# Supplementary material for: A Fractional-Order Discrete Noninvertible Map of Cubic Type: Dynamics, Control, and Synchronization
Source: Hindawi journal article supplement (doi:10.1155/2020/2935192), 2020-05-22
Supplement: f1 [file 2935192.f1.zip]

Archive with 6 entries (6 files):
- 2935192.f1/discretesanweiIN1q98b.dat
- 2935192.f1/discretesanweiIN1q98c.dat
- 2935192.f1/discretesanweiIN2q98b.dat
- 2935192.f1/discretesanweiIN2q98c.dat
- 2935192.f1/discretesanweiqIN1.dat
- 2935192.f1/discretesanweiqIN2.dat
