# Supplementary material for: A Fractional-Order Discrete Noninvertible Map of Cubic Type: Dynamics, Control, and Synchronization
Source: Hindawi journal article supplement (doi:10.1155/2020/2935192), 2020-05-22
Supplement: f1 [file 2935192.f1.zip › 2935192.f1/discretesanweiIN1q98b.dat]

  0.20000000  -0.36115078
  0.20000000  -0.36115079
  0.20000000  -0.36115080
  0.20000000  -0.36115080
  0.20000000  -0.36115081
  0.20000000  -0.36115082
  0.20000000  -0.36115082
  0.20000000  -0.36115083
  0.20000000  -0.36115084
  0.20000000  -0.36115084
  0.20000000  -0.36115085
  0.20000000  -0.36115086
  0.20000000  -0.36115086
  0.20000000  -0.36115087
  0.20000000  -0.36115088
  0.20000000  -0.36115088
  0.20000000  -0.36115089
  0.20000000  -0.36115090
  0.20000000  -0.36115091
  0.20000000  -0.36115091
  0.20000000  -0.36115092
  0.20000000  -0.36115093
  0.20000000  -0.36115093
  0.20000000  -0.36115094
  0.20000000  -0.36115095
  0.20000000  -0.36115095
  0.20000000  -0.36115096
  0.20000000  -0.36115097
  0.20000000  -0.36115097
  0.20000000  -0.36115098
  0.20000000  -0.36115099
  0.20000000  -0.36115099
  0.20000000  -0.36115100
  0.20000000  -0.36115100
  0.20000000  -0.36115101
  0.20000000  -0.36115102
  0.20000000  -0.36115102
  0.20000000  -0.36115103
  0.20000000  -0.36115104
  0.20000000  -0.36115104
  0.20100000  -0.36219510
  0.20100000  -0.36219511
  0.20100000  -0.36219512
  0.20100000  -0.36219513
  0.20100000  -0.36219513
  0.20100000  -0.36219514
  0.20100000  -0.36219515
  0.20100000  -0.36219515
  0.20100000  -0.36219516
  0.20100000  -0.36219517
  0.20100000  -0.36219517
  0.20100000  -0.36219518
  0.20100000  -0.36219519
  0.20100000  -0.36219520
  0.20100000  -0.36219520
  0.20100000  -0.36219521
  0.20100000  -0.36219522
  0.20100000  -0.36219522
  0.20100000  -0.36219523
  0.20100000  -0.36219524
  0.20100000  -0.36219524
  0.20100000  -0.36219525
  0.20100000  -0.36219526
  0.20100000  -0.36219526
  0.20100000  -0.36219527
  0.20100000  -0.36219528
  0.20100000  -0.36219528
  0.20100000  -0.36219529
  0.20100000  -0.36219530
  0.20100000  -0.36219530
  0.20100000  -0.36219531
  0.20100000  -0.36219532
  0.20100000  -0.36219532
  0.20100000  -0.36219533
  0.20100000  -0.36219534
  0.20100000  -0.36219534
  0.20100000  -0.36219535
  0.20100000  -0.36219536
  0.20100000  -0.36219536
  0.20100000  -0.36219537
  0.20200000  -0.36323462
  0.20200000  -0.36323463
  0.20200000  -0.36323463
  0.20200000  -0.36323464
  0.20200000  -0.36323465
  0.20200000  -0.36323466
  0.20200000  -0.36323466
  0.20200000  -0.36323467
  0.20200000  -0.36323468
  0.20200000  -0.36323468
  0.20200000  -0.36323469
  0.20200000  -0.36323470
  0.20200000  -0.36323470
  0.20200000  -0.36323471
  0.20200000  -0.36323472
  0.20200000  -0.36323473
  0.20200000  -0.36323473
  0.20200000  -0.36323474
  0.20200000  -0.36323475
  0.20200000  -0.36323475
  0.20200000  -0.36323476
  0.20200000  -0.36323477
  0.20200000  -0.36323477
  0.20200000  -0.36323478
  0.20200000  -0.36323479
  0.20200000  -0.36323479
  0.20200000  -0.36323480
  0.20200000  -0.36323481
  0.20200000  -0.36323482
  0.20200000  -0.36323482
  0.20200000  -0.36323483
  0.20200000  -0.36323484
  0.20200000  -0.36323484
  0.20200000  -0.36323485
  0.20200000  -0.36323486
  0.20200000  -0.36323486
  0.20200000  -0.36323487
  0.20200000  -0.36323488
  0.20200000  -0.36323488
  0.20200000  -0.36323489
  0.20300000  -0.36426937
  0.20300000  -0.36426938
  0.20300000  -0.36426939
  0.20300000  -0.36426940
  0.20300000  -0.36426940
  0.20300000  -0.36426941
  0.20300000  -0.36426942
  0.20300000  -0.36426942
  0.20300000  -0.36426943
  0.20300000  -0.36426944
  0.20300000  -0.36426945
  0.20300000  -0.36426945
  0.20300000  -0.36426946
  0.20300000  -0.36426947
  0.20300000  -0.36426947
  0.20300000  -0.36426948
  0.20300000  -0.36426949
  0.20300000  -0.36426950
  0.20300000  -0.36426950
  0.20300000  -0.36426951
  0.20300000  -0.36426952
  0.20300000  -0.36426952
  0.20300000  -0.36426953
  0.20300000  -0.36426954
  0.20300000  -0.36426954
  0.20300000  -0.36426955
  0.20300000  -0.36426956
  0.20300000  -0.36426957
  0.20300000  -0.36426957
  0.20300000  -0.36426958
  0.20300000  -0.36426959
  0.20300000  -0.36426959
  0.20300000  -0.36426960
  0.20300000  -0.36426961
  0.20300000  -0.36426961
  0.20300000  -0.36426962
  0.20300000  -0.36426963
  0.20300000  -0.36426963
  0.20300000  -0.36426964
  0.20300000  -0.36426965
  0.20400000  -0.36529941
  0.20400000  -0.36529942
  0.20400000  -0.36529943
  0.20400000  -0.36529943
  0.20400000  -0.36529944
  0.20400000  -0.36529945
  0.20400000  -0.36529946
  0.20400000  -0.36529946
  0.20400000  -0.36529947
  0.20400000  -0.36529948
  0.20400000  -0.36529949
  0.20400000  -0.36529949
  0.20400000  -0.36529950
  0.20400000  -0.36529951
  0.20400000  -0.36529951
  0.20400000  -0.36529952
  0.20400000  -0.36529953
  0.20400000  -0.36529954
  0.20400000  -0.36529954
  0.20400000  -0.36529955
  0.20400000  -0.36529956
  0.20400000  -0.36529956
  0.20400000  -0.36529957
  0.20400000  -0.36529958
  0.20400000  -0.36529958
  0.20400000  -0.36529959
  0.20400000  -0.36529960
  0.20400000  -0.36529961
  0.20400000  -0.36529961
  0.20400000  -0.36529962
  0.20400000  -0.36529963
  0.20400000  -0.36529963
  0.20400000  -0.36529964
  0.20400000  -0.36529965
  0.20400000  -0.36529965
  0.20400000  -0.36529966
  0.20400000  -0.36529967
  0.20400000  -0.36529967
  0.20400000  -0.36529968
  0.20400000  -0.36529969
  0.20500000  -0.36632478
  0.20500000  -0.36632479
  0.20500000  -0.36632479
  0.20500000  -0.36632480
  0.20500000  -0.36632481
  0.20500000  -0.36632482
  0.20500000  -0.36632482
  0.20500000  -0.36632483
  0.20500000  -0.36632484
  0.20500000  -0.36632485
  0.20500000  -0.36632485
  0.20500000  -0.36632486
  0.20500000  -0.36632487
  0.20500000  -0.36632487
  0.20500000  -0.36632488
  0.20500000  -0.36632489
  0.20500000  -0.36632490
  0.20500000  -0.36632490
  0.20500000  -0.36632491
  0.20500000  -0.36632492
  0.20500000  -0.36632493
  0.20500000  -0.36632493
  0.20500000  -0.36632494
  0.20500000  -0.36632495
  0.20500000  -0.36632495
  0.20500000  -0.36632496
  0.20500000  -0.36632497
  0.20500000  -0.36632497
  0.20500000  -0.36632498
  0.20500000  -0.36632499
  0.20500000  -0.36632500
  0.20500000  -0.36632500
  0.20500000  -0.36632501
  0.20500000  -0.36632502
  0.20500000  -0.36632502
  0.20500000  -0.36632503
  0.20500000  -0.36632504
  0.20500000  -0.36632504
  0.20500000  -0.36632505
  0.20500000  -0.36632506
  0.20600000  -0.36734552
  0.20600000  -0.36734553
  0.20600000  -0.36734553
  0.20600000  -0.36734554
  0.20600000  -0.36734555
  0.20600000  -0.36734556
  0.20600000  -0.36734556
  0.20600000  -0.36734557
  0.20600000  -0.36734558
  0.20600000  -0.36734559
  0.20600000  -0.36734559
  0.20600000  -0.36734560
  0.20600000  -0.36734561
  0.20600000  -0.36734561
  0.20600000  -0.36734562
  0.20600000  -0.36734563
  0.20600000  -0.36734564
  0.20600000  -0.36734564
  0.20600000  -0.36734565
  0.20600000  -0.36734566
  0.20600000  -0.36734567
  0.20600000  -0.36734567
  0.20600000  -0.36734568
  0.20600000  -0.36734569
  0.20600000  -0.36734569
  0.20600000  -0.36734570
  0.20600000  -0.36734571
  0.20600000  -0.36734572
  0.20600000  -0.36734572
  0.20600000  -0.36734573
  0.20600000  -0.36734574
  0.20600000  -0.36734574
  0.20600000  -0.36734575
  0.20600000  -0.36734576
  0.20600000  -0.36734577
  0.20600000  -0.36734577
  0.20600000  -0.36734578
  0.20600000  -0.36734579
  0.20600000  -0.36734579
  0.20600000  -0.36734580
  0.20700000  -0.36836167
  0.20700000  -0.36836168
  0.20700000  -0.36836169
  0.20700000  -0.36836169
  0.20700000  -0.36836170
  0.20700000  -0.36836171
  0.20700000  -0.36836172
  0.20700000  -0.36836172
  0.20700000  -0.36836173
  0.20700000  -0.36836174
  0.20700000  -0.36836175
  0.20700000  -0.36836175
  0.20700000  -0.36836176
  0.20700000  -0.36836177
  0.20700000  -0.36836178
  0.20700000  -0.36836178
  0.20700000  -0.36836179
  0.20700000  -0.36836180
  0.20700000  -0.36836181
  0.20700000  -0.36836181
  0.20700000  -0.36836182
  0.20700000  -0.36836183
  0.20700000  -0.36836184
  0.20700000  -0.36836184
  0.20700000  -0.36836185
  0.20700000  -0.36836186
  0.20700000  -0.36836186
  0.20700000  -0.36836187
  0.20700000  -0.36836188
  0.20700000  -0.36836189
  0.20700000  -0.36836189
  0.20700000  -0.36836190
  0.20700000  -0.36836191
  0.20700000  -0.36836192
  0.20700000  -0.36836192
  0.20700000  -0.36836193
  0.20700000  -0.36836194
  0.20700000  -0.36836194
  0.20700000  -0.36836195
  0.20700000  -0.36836196
  0.20800000  -0.36937328
  0.20800000  -0.36937329
  0.20800000  -0.36937330
  0.20800000  -0.36937331
  0.20800000  -0.36937331
  0.20800000  -0.36937332
  0.20800000  -0.36937333
  0.20800000  -0.36937334
  0.20800000  -0.36937334
  0.20800000  -0.36937335
  0.20800000  -0.36937336
  0.20800000  -0.36937337
  0.20800000  -0.36937337
  0.20800000  -0.36937338
  0.20800000  -0.36937339
  0.20800000  -0.36937340
  0.20800000  -0.36937340
  0.20800000  -0.36937341
  0.20800000  -0.36937342
  0.20800000  -0.36937343
  0.20800000  -0.36937343
  0.20800000  -0.36937344
  0.20800000  -0.36937345
  0.20800000  -0.36937346
  0.20800000  -0.36937346
  0.20800000  -0.36937347
  0.20800000  -0.36937348
  0.20800000  -0.36937349
  0.20800000  -0.36937349
  0.20800000  -0.36937350
  0.20800000  -0.36937351
  0.20800000  -0.36937351
  0.20800000  -0.36937352
  0.20800000  -0.36937353
  0.20800000  -0.36937354
  0.20800000  -0.36937354
  0.20800000  -0.36937355
  0.20800000  -0.36937356
  0.20800000  -0.36937356
  0.20800000  -0.36937357
  0.20900000  -0.37038039
  0.20900000  -0.37038040
  0.20900000  -0.37038041
  0.20900000  -0.37038042
  0.20900000  -0.37038042
  0.20900000  -0.37038043
  0.20900000  -0.37038044
  0.20900000  -0.37038045
  0.20900000  -0.37038046
  0.20900000  -0.37038046
  0.20900000  -0.37038047
  0.20900000  -0.37038048
  0.20900000  -0.37038049
  0.20900000  -0.37038049
  0.20900000  -0.37038050
  0.20900000  -0.37038051
  0.20900000  -0.37038052
  0.20900000  -0.37038052
  0.20900000  -0.37038053
  0.20900000  -0.37038054
  0.20900000  -0.37038055
  0.20900000  -0.37038055
  0.20900000  -0.37038056
  0.20900000  -0.37038057
  0.20900000  -0.37038058
  0.20900000  -0.37038058
  0.20900000  -0.37038059
  0.20900000  -0.37038060
  0.20900000  -0.37038061
  0.20900000  -0.37038061
  0.20900000  -0.37038062
  0.20900000  -0.37038063
  0.20900000  -0.37038063
  0.20900000  -0.37038064
  0.20900000  -0.37038065
  0.20900000  -0.37038066
  0.20900000  -0.37038066
  0.20900000  -0.37038067
  0.20900000  -0.37038068
  0.20900000  -0.37038069
  0.21000000  -0.37138304
  0.21000000  -0.37138305
  0.21000000  -0.37138306
  0.21000000  -0.37138307
  0.21000000  -0.37138308
  0.21000000  -0.37138308
  0.21000000  -0.37138309
  0.21000000  -0.37138310
  0.21000000  -0.37138311
  0.21000000  -0.37138311
  0.21000000  -0.37138312
  0.21000000  -0.37138313
  0.21000000  -0.37138314
  0.21000000  -0.37138315
  0.21000000  -0.37138315
  0.21000000  -0.37138316
  0.21000000  -0.37138317
  0.21000000  -0.37138318
  0.21000000  -0.37138318
  0.21000000  -0.37138319
  0.21000000  -0.37138320
  0.21000000  -0.37138321
  0.21000000  -0.37138321
  0.21000000  -0.37138322
  0.21000000  -0.37138323
  0.21000000  -0.37138324
  0.21000000  -0.37138324
  0.21000000  -0.37138325
  0.21000000  -0.37138326
  0.21000000  -0.37138327
  0.21000000  -0.37138327
  0.21000000  -0.37138328
  0.21000000  -0.37138329
  0.21000000  -0.37138330
  0.21000000  -0.37138330
  0.21000000  -0.37138331
  0.21000000  -0.37138332
  0.21000000  -0.37138332
  0.21000000  -0.37138333
  0.21000000  -0.37138334
  0.21100000  -0.37238128
  0.21100000  -0.37238128
  0.21100000  -0.37238129
  0.21100000  -0.37238130
  0.21100000  -0.37238131
  0.21100000  -0.37238132
  0.21100000  -0.37238132
  0.21100000  -0.37238133
  0.21100000  -0.37238134
  0.21100000  -0.37238135
  0.21100000  -0.37238135
  0.21100000  -0.37238136
  0.21100000  -0.37238137
  0.21100000  -0.37238138
  0.21100000  -0.37238139
  0.21100000  -0.37238139
  0.21100000  -0.37238140
  0.21100000  -0.37238141
  0.21100000  -0.37238142
  0.21100000  -0.37238142
  0.21100000  -0.37238143
  0.21100000  -0.37238144
  0.21100000  -0.37238145
  0.21100000  -0.37238145
  0.21100000  -0.37238146
  0.21100000  -0.37238147
  0.21100000  -0.37238148
  0.21100000  -0.37238148
  0.21100000  -0.37238149
  0.21100000  -0.37238150
  0.21100000  -0.37238151
  0.21100000  -0.37238151
  0.21100000  -0.37238152
  0.21100000  -0.37238153
  0.21100000  -0.37238154
  0.21100000  -0.37238154
  0.21100000  -0.37238155
  0.21100000  -0.37238156
  0.21100000  -0.37238157
  0.21100000  -0.37238157
  0.21200000  -0.37337513
  0.21200000  -0.37337514
  0.21200000  -0.37337514
  0.21200000  -0.37337515
  0.21200000  -0.37337516
  0.21200000  -0.37337517
  0.21200000  -0.37337518
  0.21200000  -0.37337518
  0.21200000  -0.37337519
  0.21200000  -0.37337520
  0.21200000  -0.37337521
  0.21200000  -0.37337522
  0.21200000  -0.37337522
  0.21200000  -0.37337523
  0.21200000  -0.37337524
  0.21200000  -0.37337525
  0.21200000  -0.37337525
  0.21200000  -0.37337526
  0.21200000  -0.37337527
  0.21200000  -0.37337528
  0.21200000  -0.37337529
  0.21200000  -0.37337529
  0.21200000  -0.37337530
  0.21200000  -0.37337531
  0.21200000  -0.37337532
  0.21200000  -0.37337532
  0.21200000  -0.37337533
  0.21200000  -0.37337534
  0.21200000  -0.37337535
  0.21200000  -0.37337535
  0.21200000  -0.37337536
  0.21200000  -0.37337537
  0.21200000  -0.37337538
  0.21200000  -0.37337538
  0.21200000  -0.37337539
  0.21200000  -0.37337540
  0.21200000  -0.37337541
  0.21200000  -0.37337541
  0.21200000  -0.37337542
  0.21200000  -0.37337543
  0.21300000  -0.37436464
  0.21300000  -0.37436465
  0.21300000  -0.37436466
  0.21300000  -0.37436466
  0.21300000  -0.37436467
  0.21300000  -0.37436468
  0.21300000  -0.37436469
  0.21300000  -0.37436470
  0.21300000  -0.37436470
  0.21300000  -0.37436471
  0.21300000  -0.37436472
  0.21300000  -0.37436473
  0.21300000  -0.37436474
  0.21300000  -0.37436474
  0.21300000  -0.37436475
  0.21300000  -0.37436476
  0.21300000  -0.37436477
  0.21300000  -0.37436478
  0.21300000  -0.37436478
  0.21300000  -0.37436479
  0.21300000  -0.37436480
  0.21300000  -0.37436481
  0.21300000  -0.37436481
  0.21300000  -0.37436482
  0.21300000  -0.37436483
  0.21300000  -0.37436484
  0.21300000  -0.37436485
  0.21300000  -0.37436485
  0.21300000  -0.37436486
  0.21300000  -0.37436487
  0.21300000  -0.37436488
  0.21300000  -0.37436488
  0.21300000  -0.37436489
  0.21300000  -0.37436490
  0.21300000  -0.37436491
  0.21300000  -0.37436491
  0.21300000  -0.37436492
  0.21300000  -0.37436493
  0.21300000  -0.37436494
  0.21300000  -0.37436494
  0.21400000  -0.37534985
  0.21400000  -0.37534986
  0.21400000  -0.37534987
  0.21400000  -0.37534987
  0.21400000  -0.37534988
  0.21400000  -0.37534989
  0.21400000  -0.37534990
  0.21400000  -0.37534991
  0.21400000  -0.37534992
  0.21400000  -0.37534992
  0.21400000  -0.37534993
  0.21400000  -0.37534994
  0.21400000  -0.37534995
  0.21400000  -0.37534996
  0.21400000  -0.37534996
  0.21400000  -0.37534997
  0.21400000  -0.37534998
  0.21400000  -0.37534999
  0.21400000  -0.37535000
  0.21400000  -0.37535000
  0.21400000  -0.37535001
  0.21400000  -0.37535002
  0.21400000  -0.37535003
  0.21400000  -0.37535003
  0.21400000  -0.37535004
  0.21400000  -0.37535005
  0.21400000  -0.37535006
  0.21400000  -0.37535007
  0.21400000  -0.37535007
  0.21400000  -0.37535008
  0.21400000  -0.37535009
  0.21400000  -0.37535010
  0.21400000  -0.37535010
  0.21400000  -0.37535011
  0.21400000  -0.37535012
  0.21400000  -0.37535013
  0.21400000  -0.37535013
  0.21400000  -0.37535014
  0.21400000  -0.37535015
  0.21400000  -0.37535016
  0.21500000  -0.37633080
  0.21500000  -0.37633081
  0.21500000  -0.37633081
  0.21500000  -0.37633082
  0.21500000  -0.37633083
  0.21500000  -0.37633084
  0.21500000  -0.37633085
  0.21500000  -0.37633086
  0.21500000  -0.37633086
  0.21500000  -0.37633087
  0.21500000  -0.37633088
  0.21500000  -0.37633089
  0.21500000  -0.37633090
  0.21500000  -0.37633090
  0.21500000  -0.37633091
  0.21500000  -0.37633092
  0.21500000  -0.37633093
  0.21500000  -0.37633094
  0.21500000  -0.37633094
  0.21500000  -0.37633095
  0.21500000  -0.37633096
  0.21500000  -0.37633097
  0.21500000  -0.37633098
  0.21500000  -0.37633098
  0.21500000  -0.37633099
  0.21500000  -0.37633100
  0.21500000  -0.37633101
  0.21500000  -0.37633101
  0.21500000  -0.37633102
  0.21500000  -0.37633103
  0.21500000  -0.37633104
  0.21500000  -0.37633105
  0.21500000  -0.37633105
  0.21500000  -0.37633106
  0.21500000  -0.37633107
  0.21500000  -0.37633108
  0.21500000  -0.37633108
  0.21500000  -0.37633109
  0.21500000  -0.37633110
  0.21500000  -0.37633111
  0.21600000  -0.37730752
  0.21600000  -0.37730753
  0.21600000  -0.37730754
  0.21600000  -0.37730754
  0.21600000  -0.37730755
  0.21600000  -0.37730756
  0.21600000  -0.37730757
  0.21600000  -0.37730758
  0.21600000  -0.37730759
  0.21600000  -0.37730759
  0.21600000  -0.37730760
  0.21600000  -0.37730761
  0.21600000  -0.37730762
  0.21600000  -0.37730763
  0.21600000  -0.37730763
  0.21600000  -0.37730764
  0.21600000  -0.37730765
  0.21600000  -0.37730766
  0.21600000  -0.37730767
  0.21600000  -0.37730767
  0.21600000  -0.37730768
  0.21600000  -0.37730769
  0.21600000  -0.37730770
  0.21600000  -0.37730771
  0.21600000  -0.37730771
  0.21600000  -0.37730772
  0.21600000  -0.37730773
  0.21600000  -0.37730774
  0.21600000  -0.37730775
  0.21600000  -0.37730775
  0.21600000  -0.37730776
  0.21600000  -0.37730777
  0.21600000  -0.37730778
  0.21600000  -0.37730779
  0.21600000  -0.37730779
  0.21600000  -0.37730780
  0.21600000  -0.37730781
  0.21600000  -0.37730782
  0.21600000  -0.37730782
  0.21600000  -0.37730783
  0.21700000  -0.37828005
  0.21700000  -0.37828006
  0.21700000  -0.37828007
  0.21700000  -0.37828008
  0.21700000  -0.37828009
  0.21700000  -0.37828009
  0.21700000  -0.37828010
  0.21700000  -0.37828011
  0.21700000  -0.37828012
  0.21700000  -0.37828013
  0.21700000  -0.37828014
  0.21700000  -0.37828014
  0.21700000  -0.37828015
  0.21700000  -0.37828016
  0.21700000  -0.37828017
  0.21700000  -0.37828018
  0.21700000  -0.37828018
  0.21700000  -0.37828019
  0.21700000  -0.37828020
  0.21700000  -0.37828021
  0.21700000  -0.37828022
  0.21700000  -0.37828022
  0.21700000  -0.37828023
  0.21700000  -0.37828024
  0.21700000  -0.37828025
  0.21700000  -0.37828026
  0.21700000  -0.37828026
  0.21700000  -0.37828027
  0.21700000  -0.37828028
  0.21700000  -0.37828029
  0.21700000  -0.37828030
  0.21700000  -0.37828030
  0.21700000  -0.37828031
  0.21700000  -0.37828032
  0.21700000  -0.37828033
  0.21700000  -0.37828034
  0.21700000  -0.37828034
  0.21700000  -0.37828035
  0.21700000  -0.37828036
  0.21700000  -0.37828037
  0.21800000  -0.37924843
  0.21800000  -0.37924844
  0.21800000  -0.37924845
  0.21800000  -0.37924846
  0.21800000  -0.37924847
  0.21800000  -0.37924847
  0.21800000  -0.37924848
  0.21800000  -0.37924849
  0.21800000  -0.37924850
  0.21800000  -0.37924851
  0.21800000  -0.37924852
  0.21800000  -0.37924852
  0.21800000  -0.37924853
  0.21800000  -0.37924854
  0.21800000  -0.37924855
  0.21800000  -0.37924856
  0.21800000  -0.37924857
  0.21800000  -0.37924857
  0.21800000  -0.37924858
  0.21800000  -0.37924859
  0.21800000  -0.37924860
  0.21800000  -0.37924861
  0.21800000  -0.37924861
  0.21800000  -0.37924862
  0.21800000  -0.37924863
  0.21800000  -0.37924864
  0.21800000  -0.37924865
  0.21800000  -0.37924866
  0.21800000  -0.37924866
  0.21800000  -0.37924867
  0.21800000  -0.37924868
  0.21800000  -0.37924869
  0.21800000  -0.37924869
  0.21800000  -0.37924870
  0.21800000  -0.37924871
  0.21800000  -0.37924872
  0.21800000  -0.37924873
  0.21800000  -0.37924873
  0.21800000  -0.37924874
  0.21800000  -0.37924875
  0.21900000  -0.38021270
  0.21900000  -0.38021270
  0.21900000  -0.38021271
  0.21900000  -0.38021272
  0.21900000  -0.38021273
  0.21900000  -0.38021274
  0.21900000  -0.38021275
  0.21900000  -0.38021276
  0.21900000  -0.38021276
  0.21900000  -0.38021277
  0.21900000  -0.38021278
  0.21900000  -0.38021279
  0.21900000  -0.38021280
  0.21900000  -0.38021281
  0.21900000  -0.38021281
  0.21900000  -0.38021282
  0.21900000  -0.38021283
  0.21900000  -0.38021284
  0.21900000  -0.38021285
  0.21900000  -0.38021286
  0.21900000  -0.38021286
  0.21900000  -0.38021287
  0.21900000  -0.38021288
  0.21900000  -0.38021289
  0.21900000  -0.38021290
  0.21900000  -0.38021290
  0.21900000  -0.38021291
  0.21900000  -0.38021292
  0.21900000  -0.38021293
  0.21900000  -0.38021294
  0.21900000  -0.38021295
  0.21900000  -0.38021295
  0.21900000  -0.38021296
  0.21900000  -0.38021297
  0.21900000  -0.38021298
  0.21900000  -0.38021299
  0.21900000  -0.38021299
  0.21900000  -0.38021300
  0.21900000  -0.38021301
  0.21900000  -0.38021302
  0.22000000  -0.38117288
  0.22000000  -0.38117289
  0.22000000  -0.38117290
  0.22000000  -0.38117291
  0.22000000  -0.38117291
  0.22000000  -0.38117292
  0.22000000  -0.38117293
  0.22000000  -0.38117294
  0.22000000  -0.38117295
  0.22000000  -0.38117296
  0.22000000  -0.38117296
  0.22000000  -0.38117297
  0.22000000  -0.38117298
  0.22000000  -0.38117299
  0.22000000  -0.38117300
  0.22000000  -0.38117301
  0.22000000  -0.38117302
  0.22000000  -0.38117302
  0.22000000  -0.38117303
  0.22000000  -0.38117304
  0.22000000  -0.38117305
  0.22000000  -0.38117306
  0.22000000  -0.38117307
  0.22000000  -0.38117307
  0.22000000  -0.38117308
  0.22000000  -0.38117309
  0.22000000  -0.38117310
  0.22000000  -0.38117311
  0.22000000  -0.38117311
  0.22000000  -0.38117312
  0.22000000  -0.38117313
  0.22000000  -0.38117314
  0.22000000  -0.38117315
  0.22000000  -0.38117315
  0.22000000  -0.38117316
  0.22000000  -0.38117317
  0.22000000  -0.38117318
  0.22000000  -0.38117319
  0.22000000  -0.38117319
  0.22000000  -0.38117320
  0.22100000  -0.38212902
  0.22100000  -0.38212903
  0.22100000  -0.38212903
  0.22100000  -0.38212904
  0.22100000  -0.38212905
  0.22100000  -0.38212906
  0.22100000  -0.38212907
  0.22100000  -0.38212908
  0.22100000  -0.38212909
  0.22100000  -0.38212909
  0.22100000  -0.38212910
  0.22100000  -0.38212911
  0.22100000  -0.38212912
  0.22100000  -0.38212913
  0.22100000  -0.38212914
  0.22100000  -0.38212915
  0.22100000  -0.38212915
  0.22100000  -0.38212916
  0.22100000  -0.38212917
  0.22100000  -0.38212918
  0.22100000  -0.38212919
  0.22100000  -0.38212920
  0.22100000  -0.38212920
  0.22100000  -0.38212921
  0.22100000  -0.38212922
  0.22100000  -0.38212923
  0.22100000  -0.38212924
  0.22100000  -0.38212925
  0.22100000  -0.38212925
  0.22100000  -0.38212926
  0.22100000  -0.38212927
  0.22100000  -0.38212928
  0.22100000  -0.38212929
  0.22100000  -0.38212929
  0.22100000  -0.38212930
  0.22100000  -0.38212931
  0.22100000  -0.38212932
  0.22100000  -0.38212933
  0.22100000  -0.38212933
  0.22100000  -0.38212934
  0.22200000  -0.38308114
  0.22200000  -0.38308115
  0.22200000  -0.38308116
  0.22200000  -0.38308117
  0.22200000  -0.38308118
  0.22200000  -0.38308119
  0.22200000  -0.38308120
  0.22200000  -0.38308120
  0.22200000  -0.38308121
  0.22200000  -0.38308122
  0.22200000  -0.38308123
  0.22200000  -0.38308124
  0.22200000  -0.38308125
  0.22200000  -0.38308126
  0.22200000  -0.38308126
  0.22200000  -0.38308127
  0.22200000  -0.38308128
  0.22200000  -0.38308129
  0.22200000  -0.38308130
  0.22200000  -0.38308131
  0.22200000  -0.38308131
  0.22200000  -0.38308132
  0.22200000  -0.38308133
  0.22200000  -0.38308134
  0.22200000  -0.38308135
  0.22200000  -0.38308136
  0.22200000  -0.38308136
  0.22200000  -0.38308137
  0.22200000  -0.38308138
  0.22200000  -0.38308139
  0.22200000  -0.38308140
  0.22200000  -0.38308141
  0.22200000  -0.38308141
  0.22200000  -0.38308142
  0.22200000  -0.38308143
  0.22200000  -0.38308144
  0.22200000  -0.38308145
  0.22200000  -0.38308146
  0.22200000  -0.38308146
  0.22200000  -0.38308147
  0.22300000  -0.38402929
  0.22300000  -0.38402930
  0.22300000  -0.38402931
  0.22300000  -0.38402932
  0.22300000  -0.38402933
  0.22300000  -0.38402934
  0.22300000  -0.38402934
  0.22300000  -0.38402935
  0.22300000  -0.38402936
  0.22300000  -0.38402937
  0.22300000  -0.38402938
  0.22300000  -0.38402939
  0.22300000  -0.38402940
  0.22300000  -0.38402940
  0.22300000  -0.38402941
  0.22300000  -0.38402942
  0.22300000  -0.38402943
  0.22300000  -0.38402944
  0.22300000  -0.38402945
  0.22300000  -0.38402946
  0.22300000  -0.38402946
  0.22300000  -0.38402947
  0.22300000  -0.38402948
  0.22300000  -0.38402949
  0.22300000  -0.38402950
  0.22300000  -0.38402951
  0.22300000  -0.38402952
  0.22300000  -0.38402952
  0.22300000  -0.38402953
  0.22300000  -0.38402954
  0.22300000  -0.38402955
  0.22300000  -0.38402956
  0.22300000  -0.38402957
  0.22300000  -0.38402957
  0.22300000  -0.38402958
  0.22300000  -0.38402959
  0.22300000  -0.38402960
  0.22300000  -0.38402961
  0.22300000  -0.38402961
  0.22300000  -0.38402962
  0.22400000  -0.38497350
  0.22400000  -0.38497350
  0.22400000  -0.38497351
  0.22400000  -0.38497352
  0.22400000  -0.38497353
  0.22400000  -0.38497354
  0.22400000  -0.38497355
  0.22400000  -0.38497356
  0.22400000  -0.38497357
  0.22400000  -0.38497358
  0.22400000  -0.38497358
  0.22400000  -0.38497359
  0.22400000  -0.38497360
  0.22400000  -0.38497361
  0.22400000  -0.38497362
  0.22400000  -0.38497363
  0.22400000  -0.38497364
  0.22400000  -0.38497364
  0.22400000  -0.38497365
  0.22400000  -0.38497366
  0.22400000  -0.38497367
  0.22400000  -0.38497368
  0.22400000  -0.38497369
  0.22400000  -0.38497370
  0.22400000  -0.38497370
  0.22400000  -0.38497371
  0.22400000  -0.38497372
  0.22400000  -0.38497373
  0.22400000  -0.38497374
  0.22400000  -0.38497375
  0.22400000  -0.38497376
  0.22400000  -0.38497376
  0.22400000  -0.38497377
  0.22400000  -0.38497378
  0.22400000  -0.38497379
  0.22400000  -0.38497380
  0.22400000  -0.38497380
  0.22400000  -0.38497381
  0.22400000  -0.38497382
  0.22400000  -0.38497383
  0.22500000  -0.38591379
  0.22500000  -0.38591380
  0.22500000  -0.38591381
  0.22500000  -0.38591382
  0.22500000  -0.38591383
  0.22500000  -0.38591383
  0.22500000  -0.38591384
  0.22500000  -0.38591385
  0.22500000  -0.38591386
  0.22500000  -0.38591387
  0.22500000  -0.38591388
  0.22500000  -0.38591389
  0.22500000  -0.38591390
  0.22500000  -0.38591390
  0.22500000  -0.38591391
  0.22500000  -0.38591392
  0.22500000  -0.38591393
  0.22500000  -0.38591394
  0.22500000  -0.38591395
  0.22500000  -0.38591396
  0.22500000  -0.38591397
  0.22500000  -0.38591397
  0.22500000  -0.38591398
  0.22500000  -0.38591399
  0.22500000  -0.38591400
  0.22500000  -0.38591401
  0.22500000  -0.38591402
  0.22500000  -0.38591403
  0.22500000  -0.38591403
  0.22500000  -0.38591404
  0.22500000  -0.38591405
  0.22500000  -0.38591406
  0.22500000  -0.38591407
  0.22500000  -0.38591408
  0.22500000  -0.38591408
  0.22500000  -0.38591409
  0.22500000  -0.38591410
  0.22500000  -0.38591411
  0.22500000  -0.38591412
  0.22500000  -0.38591413
  0.22600000  -0.38685021
  0.22600000  -0.38685021
  0.22600000  -0.38685022
  0.22600000  -0.38685023
  0.22600000  -0.38685024
  0.22600000  -0.38685025
  0.22600000  -0.38685026
  0.22600000  -0.38685027
  0.22600000  -0.38685028
  0.22600000  -0.38685029
  0.22600000  -0.38685029
  0.22600000  -0.38685030
  0.22600000  -0.38685031
  0.22600000  -0.38685032
  0.22600000  -0.38685033
  0.22600000  -0.38685034
  0.22600000  -0.38685035
  0.22600000  -0.38685036
  0.22600000  -0.38685036
  0.22600000  -0.38685037
  0.22600000  -0.38685038
  0.22600000  -0.38685039
  0.22600000  -0.38685040
  0.22600000  -0.38685041
  0.22600000  -0.38685042
  0.22600000  -0.38685043
  0.22600000  -0.38685043
  0.22600000  -0.38685044
  0.22600000  -0.38685045
  0.22600000  -0.38685046
  0.22600000  -0.38685047
  0.22600000  -0.38685048
  0.22600000  -0.38685048
  0.22600000  -0.38685049
  0.22600000  -0.38685050
  0.22600000  -0.38685051
  0.22600000  -0.38685052
  0.22600000  -0.38685053
  0.22600000  -0.38685054
  0.22600000  -0.38685054
  0.22700000  -0.38778277
  0.22700000  -0.38778278
  0.22700000  -0.38778279
  0.22700000  -0.38778280
  0.22700000  -0.38778281
  0.22700000  -0.38778282
  0.22700000  -0.38778283
  0.22700000  -0.38778284
  0.22700000  -0.38778285
  0.22700000  -0.38778286
  0.22700000  -0.38778286
  0.22700000  -0.38778287
  0.22700000  -0.38778288
  0.22700000  -0.38778289
  0.22700000  -0.38778290
  0.22700000  -0.38778291
  0.22700000  -0.38778292
  0.22700000  -0.38778293
  0.22700000  -0.38778293
  0.22700000  -0.38778294
  0.22700000  -0.38778295
  0.22700000  -0.38778296
  0.22700000  -0.38778297
  0.22700000  -0.38778298
  0.22700000  -0.38778299
  0.22700000  -0.38778300
  0.22700000  -0.38778300
  0.22700000  -0.38778301
  0.22700000  -0.38778302
  0.22700000  -0.38778303
  0.22700000  -0.38778304
  0.22700000  -0.38778305
  0.22700000  -0.38778306
  0.22700000  -0.38778306
  0.22700000  -0.38778307
  0.22700000  -0.38778308
  0.22700000  -0.38778309
  0.22700000  -0.38778310
  0.22700000  -0.38778311
  0.22700000  -0.38778312
  0.22800000  -0.38871153
  0.22800000  -0.38871154
  0.22800000  -0.38871155
  0.22800000  -0.38871156
  0.22800000  -0.38871157
  0.22800000  -0.38871157
  0.22800000  -0.38871158
  0.22800000  -0.38871159
  0.22800000  -0.38871160
  0.22800000  -0.38871161
  0.22800000  -0.38871162
  0.22800000  -0.38871163
  0.22800000  -0.38871164
  0.22800000  -0.38871165
  0.22800000  -0.38871166
  0.22800000  -0.38871166
  0.22800000  -0.38871167
  0.22800000  -0.38871168
  0.22800000  -0.38871169
  0.22800000  -0.38871170
  0.22800000  -0.38871171
  0.22800000  -0.38871172
  0.22800000  -0.38871173
  0.22800000  -0.38871173
  0.22800000  -0.38871174
  0.22800000  -0.38871175
  0.22800000  -0.38871176
  0.22800000  -0.38871177
  0.22800000  -0.38871178
  0.22800000  -0.38871179
  0.22800000  -0.38871180
  0.22800000  -0.38871180
  0.22800000  -0.38871181
  0.22800000  -0.38871182
  0.22800000  -0.38871183
  0.22800000  -0.38871184
  0.22800000  -0.38871185
  0.22800000  -0.38871186
  0.22800000  -0.38871186
  0.22800000  -0.38871187
  0.22900000  -0.38963650
  0.22900000  -0.38963651
  0.22900000  -0.38963652
  0.22900000  -0.38963653
  0.22900000  -0.38963654
  0.22900000  -0.38963655
  0.22900000  -0.38963656
  0.22900000  -0.38963656
  0.22900000  -0.38963657
  0.22900000  -0.38963658
  0.22900000  -0.38963659
  0.22900000  -0.38963660
  0.22900000  -0.38963661
  0.22900000  -0.38963662
  0.22900000  -0.38963663
  0.22900000  -0.38963664
  0.22900000  -0.38963665
  0.22900000  -0.38963665
  0.22900000  -0.38963666
  0.22900000  -0.38963667
  0.22900000  -0.38963668
  0.22900000  -0.38963669
  0.22900000  -0.38963670
  0.22900000  -0.38963671
  0.22900000  -0.38963672
  0.22900000  -0.38963673
  0.22900000  -0.38963673
  0.22900000  -0.38963674
  0.22900000  -0.38963675
  0.22900000  -0.38963676
  0.22900000  -0.38963677
  0.22900000  -0.38963678
  0.22900000  -0.38963679
  0.22900000  -0.38963679
  0.22900000  -0.38963680
  0.22900000  -0.38963681
  0.22900000  -0.38963682
  0.22900000  -0.38963683
  0.22900000  -0.38963684
  0.22900000  -0.38963685
  0.23000000  -0.39055772
  0.23000000  -0.39055773
  0.23000000  -0.39055774
  0.23000000  -0.39055775
  0.23000000  -0.39055776
  0.23000000  -0.39055777
  0.23000000  -0.39055777
  0.23000000  -0.39055778
  0.23000000  -0.39055779
  0.23000000  -0.39055780
  0.23000000  -0.39055781
  0.23000000  -0.39055782
  0.23000000  -0.39055783
  0.23000000  -0.39055784
  0.23000000  -0.39055785
  0.23000000  -0.39055786
  0.23000000  -0.39055787
  0.23000000  -0.39055787
  0.23000000  -0.39055788
  0.23000000  -0.39055789
  0.23000000  -0.39055790
  0.23000000  -0.39055791
  0.23000000  -0.39055792
  0.23000000  -0.39055793
  0.23000000  -0.39055794
  0.23000000  -0.39055795
  0.23000000  -0.39055795
  0.23000000  -0.39055796
  0.23000000  -0.39055797
  0.23000000  -0.39055798
  0.23000000  -0.39055799
  0.23000000  -0.39055800
  0.23000000  -0.39055801
  0.23000000  -0.39055802
  0.23000000  -0.39055802
  0.23000000  -0.39055803
  0.23000000  -0.39055804
  0.23000000  -0.39055805
  0.23000000  -0.39055806
  0.23000000  -0.39055807
  0.23100000  -0.39147522
  0.23100000  -0.39147523
  0.23100000  -0.39147524
  0.23100000  -0.39147524
  0.23100000  -0.39147525
  0.23100000  -0.39147526
  0.23100000  -0.39147527
  0.23100000  -0.39147528
  0.23100000  -0.39147529
  0.23100000  -0.39147530
  0.23100000  -0.39147531
  0.23100000  -0.39147532
  0.23100000  -0.39147533
  0.23100000  -0.39147534
  0.23100000  -0.39147535
  0.23100000  -0.39147535
  0.23100000  -0.39147536
  0.23100000  -0.39147537
  0.23100000  -0.39147538
  0.23100000  -0.39147539
  0.23100000  -0.39147540
  0.23100000  -0.39147541
  0.23100000  -0.39147542
  0.23100000  -0.39147543
  0.23100000  -0.39147544
  0.23100000  -0.39147544
  0.23100000  -0.39147545
  0.23100000  -0.39147546
  0.23100000  -0.39147547
  0.23100000  -0.39147548
  0.23100000  -0.39147549
  0.23100000  -0.39147550
  0.23100000  -0.39147551
  0.23100000  -0.39147551
  0.23100000  -0.39147552
  0.23100000  -0.39147553
  0.23100000  -0.39147554
  0.23100000  -0.39147555
  0.23100000  -0.39147556
  0.23100000  -0.39147557
  0.23200000  -0.39238902
  0.23200000  -0.39238903
  0.23200000  -0.39238904
  0.23200000  -0.39238905
  0.23200000  -0.39238906
  0.23200000  -0.39238907
  0.23200000  -0.39238908
  0.23200000  -0.39238909
  0.23200000  -0.39238910
  0.23200000  -0.39238911
  0.23200000  -0.39238911
  0.23200000  -0.39238912
  0.23200000  -0.39238913
  0.23200000  -0.39238914
  0.23200000  -0.39238915
  0.23200000  -0.39238916
  0.23200000  -0.39238917
  0.23200000  -0.39238918
  0.23200000  -0.39238919
  0.23200000  -0.39238920
  0.23200000  -0.39238921
  0.23200000  -0.39238922
  0.23200000  -0.39238922
  0.23200000  -0.39238923
  0.23200000  -0.39238924
  0.23200000  -0.39238925
  0.23200000  -0.39238926
  0.23200000  -0.39238927
  0.23200000  -0.39238928
  0.23200000  -0.39238929
  0.23200000  -0.39238930
  0.23200000  -0.39238930
  0.23200000  -0.39238931
  0.23200000  -0.39238932
  0.23200000  -0.39238933
  0.23200000  -0.39238934
  0.23200000  -0.39238935
  0.23200000  -0.39238936
  0.23200000  -0.39238937
  0.23200000  -0.39238937
  0.23300000  -0.39329916
  0.23300000  -0.39329917
  0.23300000  -0.39329918
  0.23300000  -0.39329919
  0.23300000  -0.39329920
  0.23300000  -0.39329921
  0.23300000  -0.39329922
  0.23300000  -0.39329923
  0.23300000  -0.39329924
  0.23300000  -0.39329925
  0.23300000  -0.39329926
  0.23300000  -0.39329927
  0.23300000  -0.39329928
  0.23300000  -0.39329929
  0.23300000  -0.39329930
  0.23300000  -0.39329930
  0.23300000  -0.39329931
  0.23300000  -0.39329932
  0.23300000  -0.39329933
  0.23300000  -0.39329934
  0.23300000  -0.39329935
  0.23300000  -0.39329936
  0.23300000  -0.39329937
  0.23300000  -0.39329938
  0.23300000  -0.39329939
  0.23300000  -0.39329940
  0.23300000  -0.39329940
  0.23300000  -0.39329941
  0.23300000  -0.39329942
  0.23300000  -0.39329943
  0.23300000  -0.39329944
  0.23300000  -0.39329945
  0.23300000  -0.39329946
  0.23300000  -0.39329947
  0.23300000  -0.39329948
  0.23300000  -0.39329948
  0.23300000  -0.39329949
  0.23300000  -0.39329950
  0.23300000  -0.39329951
  0.23300000  -0.39329952
  0.23400000  -0.39420567
  0.23400000  -0.39420568
  0.23400000  -0.39420569
  0.23400000  -0.39420570
  0.23400000  -0.39420571
  0.23400000  -0.39420572
  0.23400000  -0.39420573
  0.23400000  -0.39420574
  0.23400000  -0.39420575
  0.23400000  -0.39420576
  0.23400000  -0.39420577
  0.23400000  -0.39420578
  0.23400000  -0.39420579
  0.23400000  -0.39420580
  0.23400000  -0.39420581
  0.23400000  -0.39420582
  0.23400000  -0.39420582
  0.23400000  -0.39420583
  0.23400000  -0.39420584
  0.23400000  -0.39420585
  0.23400000  -0.39420586
  0.23400000  -0.39420587
  0.23400000  -0.39420588
  0.23400000  -0.39420589
  0.23400000  -0.39420590
  0.23400000  -0.39420591
  0.23400000  -0.39420592
  0.23400000  -0.39420593
  0.23400000  -0.39420593
  0.23400000  -0.39420594
  0.23400000  -0.39420595
  0.23400000  -0.39420596
  0.23400000  -0.39420597
  0.23400000  -0.39420598
  0.23400000  -0.39420599
  0.23400000  -0.39420600
  0.23400000  -0.39420601
  0.23400000  -0.39420601
  0.23400000  -0.39420602
  0.23400000  -0.39420603
  0.23500000  -0.39510858
  0.23500000  -0.39510859
  0.23500000  -0.39510860
  0.23500000  -0.39510861
  0.23500000  -0.39510862
  0.23500000  -0.39510863
  0.23500000  -0.39510864
  0.23500000  -0.39510865
  0.23500000  -0.39510866
  0.23500000  -0.39510867
  0.23500000  -0.39510868
  0.23500000  -0.39510869
  0.23500000  -0.39510869
  0.23500000  -0.39510870
  0.23500000  -0.39510871
  0.23500000  -0.39510872
  0.23500000  -0.39510873
  0.23500000  -0.39510874
  0.23500000  -0.39510875
  0.23500000  -0.39510876
  0.23500000  -0.39510877
  0.23500000  -0.39510878
  0.23500000  -0.39510879
  0.23500000  -0.39510880
  0.23500000  -0.39510881
  0.23500000  -0.39510881
  0.23500000  -0.39510882
  0.23500000  -0.39510883
  0.23500000  -0.39510884
  0.23500000  -0.39510885
  0.23500000  -0.39510886
  0.23500000  -0.39510887
  0.23500000  -0.39510888
  0.23500000  -0.39510889
  0.23500000  -0.39510890
  0.23500000  -0.39510890
  0.23500000  -0.39510891
  0.23500000  -0.39510892
  0.23500000  -0.39510893
  0.23500000  -0.39510894
  0.23600000  -0.39600791
  0.23600000  -0.39600792
  0.23600000  -0.39600793
  0.23600000  -0.39600794
  0.23600000  -0.39600795
  0.23600000  -0.39600796
  0.23600000  -0.39600797
  0.23600000  -0.39600798
  0.23600000  -0.39600799
  0.23600000  -0.39600800
  0.23600000  -0.39600801
  0.23600000  -0.39600802
  0.23600000  -0.39600803
  0.23600000  -0.39600803
  0.23600000  -0.39600804
  0.23600000  -0.39600805
  0.23600000  -0.39600806
  0.23600000  -0.39600807
  0.23600000  -0.39600808
  0.23600000  -0.39600809
  0.23600000  -0.39600810
  0.23600000  -0.39600811
  0.23600000  -0.39600812
  0.23600000  -0.39600813
  0.23600000  -0.39600814
  0.23600000  -0.39600815
  0.23600000  -0.39600816
  0.23600000  -0.39600816
  0.23600000  -0.39600817
  0.23600000  -0.39600818
  0.23600000  -0.39600819
  0.23600000  -0.39600820
  0.23600000  -0.39600821
  0.23600000  -0.39600822
  0.23600000  -0.39600823
  0.23600000  -0.39600824
  0.23600000  -0.39600825
  0.23600000  -0.39600825
  0.23600000  -0.39600826
  0.23600000  -0.39600827
  0.23700000  -0.39690369
  0.23700000  -0.39690370
  0.23700000  -0.39690371
  0.23700000  -0.39690372
  0.23700000  -0.39690373
  0.23700000  -0.39690374
  0.23700000  -0.39690375
  0.23700000  -0.39690376
  0.23700000  -0.39690377
  0.23700000  -0.39690378
  0.23700000  -0.39690379
  0.23700000  -0.39690380
  0.23700000  -0.39690381
  0.23700000  -0.39690382
  0.23700000  -0.39690383
  0.23700000  -0.39690384
  0.23700000  -0.39690385
  0.23700000  -0.39690386
  0.23700000  -0.39690387
  0.23700000  -0.39690387
  0.23700000  -0.39690388
  0.23700000  -0.39690389
  0.23700000  -0.39690390
  0.23700000  -0.39690391
  0.23700000  -0.39690392
  0.23700000  -0.39690393
  0.23700000  -0.39690394
  0.23700000  -0.39690395
  0.23700000  -0.39690396
  0.23700000  -0.39690397
  0.23700000  -0.39690398
  0.23700000  -0.39690399
  0.23700000  -0.39690399
  0.23700000  -0.39690400
  0.23700000  -0.39690401
  0.23700000  -0.39690402
  0.23700000  -0.39690403
  0.23700000  -0.39690404
  0.23700000  -0.39690405
  0.23700000  -0.39690406
  0.23800000  -0.39779596
  0.23800000  -0.39779597
  0.23800000  -0.39779598
  0.23800000  -0.39779599
  0.23800000  -0.39779600
  0.23800000  -0.39779601
  0.23800000  -0.39779602
  0.23800000  -0.39779602
  0.23800000  -0.39779603
  0.23800000  -0.39779604
  0.23800000  -0.39779605
  0.23800000  -0.39779606
  0.23800000  -0.39779607
  0.23800000  -0.39779608
  0.23800000  -0.39779609
  0.23800000  -0.39779610
  0.23800000  -0.39779611
  0.23800000  -0.39779612
  0.23800000  -0.39779613
  0.23800000  -0.39779614
  0.23800000  -0.39779615
  0.23800000  -0.39779616
  0.23800000  -0.39779617
  0.23800000  -0.39779618
  0.23800000  -0.39779619
  0.23800000  -0.39779619
  0.23800000  -0.39779620
  0.23800000  -0.39779621
  0.23800000  -0.39779622
  0.23800000  -0.39779623
  0.23800000  -0.39779624
  0.23800000  -0.39779625
  0.23800000  -0.39779626
  0.23800000  -0.39779627
  0.23800000  -0.39779628
  0.23800000  -0.39779629
  0.23800000  -0.39779630
  0.23800000  -0.39779630
  0.23800000  -0.39779631
  0.23800000  -0.39779632
  0.23900000  -0.39868473
  0.23900000  -0.39868474
  0.23900000  -0.39868475
  0.23900000  -0.39868476
  0.23900000  -0.39868477
  0.23900000  -0.39868478
  0.23900000  -0.39868479
  0.23900000  -0.39868480
  0.23900000  -0.39868481
  0.23900000  -0.39868482
  0.23900000  -0.39868482
  0.23900000  -0.39868483
  0.23900000  -0.39868484
  0.23900000  -0.39868485
  0.23900000  -0.39868486
  0.23900000  -0.39868487
  0.23900000  -0.39868488
  0.23900000  -0.39868489
  0.23900000  -0.39868490
  0.23900000  -0.39868491
  0.23900000  -0.39868492
  0.23900000  -0.39868493
  0.23900000  -0.39868494
  0.23900000  -0.39868495
  0.23900000  -0.39868496
  0.23900000  -0.39868497
  0.23900000  -0.39868498
  0.23900000  -0.39868499
  0.23900000  -0.39868499
  0.23900000  -0.39868500
  0.23900000  -0.39868501
  0.23900000  -0.39868502
  0.23900000  -0.39868503
  0.23900000  -0.39868504
  0.23900000  -0.39868505
  0.23900000  -0.39868506
  0.23900000  -0.39868507
  0.23900000  -0.39868508
  0.23900000  -0.39868509
  0.23900000  -0.39868510
  0.24000000  -0.39957003
  0.24000000  -0.39957004
  0.24000000  -0.39957005
  0.24000000  -0.39957006
  0.24000000  -0.39957007
  0.24000000  -0.39957008
  0.24000000  -0.39957009
  0.24000000  -0.39957010
  0.24000000  -0.39957011
  0.24000000  -0.39957012
  0.24000000  -0.39957013
  0.24000000  -0.39957014
  0.24000000  -0.39957015
  0.24000000  -0.39957016
  0.24000000  -0.39957017
  0.24000000  -0.39957018
  0.24000000  -0.39957019
  0.24000000  -0.39957020
  0.24000000  -0.39957021
  0.24000000  -0.39957022
  0.24000000  -0.39957023
  0.24000000  -0.39957024
  0.24000000  -0.39957025
  0.24000000  -0.39957025
  0.24000000  -0.39957026
  0.24000000  -0.39957027
  0.24000000  -0.39957028
  0.24000000  -0.39957029
  0.24000000  -0.39957030
  0.24000000  -0.39957031
  0.24000000  -0.39957032
  0.24000000  -0.39957033
  0.24000000  -0.39957034
  0.24000000  -0.39957035
  0.24000000  -0.39957036
  0.24000000  -0.39957037
  0.24000000  -0.39957038
  0.24000000  -0.39957038
  0.24000000  -0.39957039
  0.24000000  -0.39957040
  0.24100000  -0.40045190
  0.24100000  -0.40045191
  0.24100000  -0.40045192
  0.24100000  -0.40045193
  0.24100000  -0.40045194
  0.24100000  -0.40045195
  0.24100000  -0.40045196
  0.24100000  -0.40045197
  0.24100000  -0.40045198
  0.24100000  -0.40045199
  0.24100000  -0.40045200
  0.24100000  -0.40045201
  0.24100000  -0.40045202
  0.24100000  -0.40045203
  0.24100000  -0.40045204
  0.24100000  -0.40045205
  0.24100000  -0.40045206
  0.24100000  -0.40045207
  0.24100000  -0.40045208
  0.24100000  -0.40045209
  0.24100000  -0.40045209
  0.24100000  -0.40045210
  0.24100000  -0.40045211
  0.24100000  -0.40045212
  0.24100000  -0.40045213
  0.24100000  -0.40045214
  0.24100000  -0.40045215
  0.24100000  -0.40045216
  0.24100000  -0.40045217
  0.24100000  -0.40045218
  0.24100000  -0.40045219
  0.24100000  -0.40045220
  0.24100000  -0.40045221
  0.24100000  -0.40045222
  0.24100000  -0.40045223
  0.24100000  -0.40045224
  0.24100000  -0.40045224
  0.24100000  -0.40045225
  0.24100000  -0.40045226
  0.24100000  -0.40045227
  0.24200000  -0.40133036
  0.24200000  -0.40133037
  0.24200000  -0.40133038
  0.24200000  -0.40133038
  0.24200000  -0.40133039
  0.24200000  -0.40133040
  0.24200000  -0.40133041
  0.24200000  -0.40133042
  0.24200000  -0.40133043
  0.24200000  -0.40133044
  0.24200000  -0.40133045
  0.24200000  -0.40133046
  0.24200000  -0.40133047
  0.24200000  -0.40133048
  0.24200000  -0.40133049
  0.24200000  -0.40133050
  0.24200000  -0.40133051
  0.24200000  -0.40133052
  0.24200000  -0.40133053
  0.24200000  -0.40133054
  0.24200000  -0.40133055
  0.24200000  -0.40133056
  0.24200000  -0.40133057
  0.24200000  -0.40133058
  0.24200000  -0.40133059
  0.24200000  -0.40133060
  0.24200000  -0.40133061
  0.24200000  -0.40133062
  0.24200000  -0.40133063
  0.24200000  -0.40133064
  0.24200000  -0.40133065
  0.24200000  -0.40133065
  0.24200000  -0.40133066
  0.24200000  -0.40133067
  0.24200000  -0.40133068
  0.24200000  -0.40133069
  0.24200000  -0.40133070
  0.24200000  -0.40133071
  0.24200000  -0.40133072
  0.24200000  -0.40133073
  0.24300000  -0.40220542
  0.24300000  -0.40220543
  0.24300000  -0.40220544
  0.24300000  -0.40220545
  0.24300000  -0.40220546
  0.24300000  -0.40220547
  0.24300000  -0.40220548
  0.24300000  -0.40220549
  0.24300000  -0.40220550
  0.24300000  -0.40220551
  0.24300000  -0.40220552
  0.24300000  -0.40220553
  0.24300000  -0.40220554
  0.24300000  -0.40220555
  0.24300000  -0.40220556
  0.24300000  -0.40220557
  0.24300000  -0.40220558
  0.24300000  -0.40220559
  0.24300000  -0.40220560
  0.24300000  -0.40220561
  0.24300000  -0.40220562
  0.24300000  -0.40220563
  0.24300000  -0.40220564
  0.24300000  -0.40220565
  0.24300000  -0.40220566
  0.24300000  -0.40220567
  0.24300000  -0.40220568
  0.24300000  -0.40220569
  0.24300000  -0.40220570
  0.24300000  -0.40220571
  0.24300000  -0.40220572
  0.24300000  -0.40220572
  0.24300000  -0.40220573
  0.24300000  -0.40220574
  0.24300000  -0.40220575
  0.24300000  -0.40220576
  0.24300000  -0.40220577
  0.24300000  -0.40220578
  0.24300000  -0.40220579
  0.24300000  -0.40220580
  0.24400000  -0.40307713
  0.24400000  -0.40307714
  0.24400000  -0.40307715
  0.24400000  -0.40307716
  0.24400000  -0.40307717
  0.24400000  -0.40307718
  0.24400000  -0.40307719
  0.24400000  -0.40307720
  0.24400000  -0.40307721
  0.24400000  -0.40307722
  0.24400000  -0.40307723
  0.24400000  -0.40307724
  0.24400000  -0.40307725
  0.24400000  -0.40307726
  0.24400000  -0.40307727
  0.24400000  -0.40307728
  0.24400000  -0.40307729
  0.24400000  -0.40307730
  0.24400000  -0.40307731
  0.24400000  -0.40307732
  0.24400000  -0.40307733
  0.24400000  -0.40307734
  0.24400000  -0.40307735
  0.24400000  -0.40307736
  0.24400000  -0.40307737
  0.24400000  -0.40307738
  0.24400000  -0.40307739
  0.24400000  -0.40307740
  0.24400000  -0.40307741
  0.24400000  -0.40307742
  0.24400000  -0.40307743
  0.24400000  -0.40307743
  0.24400000  -0.40307744
  0.24400000  -0.40307745
  0.24400000  -0.40307746
  0.24400000  -0.40307747
  0.24400000  -0.40307748
  0.24400000  -0.40307749
  0.24400000  -0.40307750
  0.24400000  -0.40307751
  0.24500000  -0.40394551
  0.24500000  -0.40394552
  0.24500000  -0.40394553
  0.24500000  -0.40394554
  0.24500000  -0.40394555
  0.24500000  -0.40394556
  0.24500000  -0.40394557
  0.24500000  -0.40394558
  0.24500000  -0.40394559
  0.24500000  -0.40394560
  0.24500000  -0.40394561
  0.24500000  -0.40394562
  0.24500000  -0.40394563
  0.24500000  -0.40394564
  0.24500000  -0.40394565
  0.24500000  -0.40394565
  0.24500000  -0.40394566
  0.24500000  -0.40394567
  0.24500000  -0.40394568
  0.24500000  -0.40394569
  0.24500000  -0.40394570
  0.24500000  -0.40394571
  0.24500000  -0.40394572
  0.24500000  -0.40394573
  0.24500000  -0.40394574
  0.24500000  -0.40394575
  0.24500000  -0.40394576
  0.24500000  -0.40394577
  0.24500000  -0.40394578
  0.24500000  -0.40394579
  0.24500000  -0.40394580
  0.24500000  -0.40394581
  0.24500000  -0.40394582
  0.24500000  -0.40394583
  0.24500000  -0.40394584
  0.24500000  -0.40394585
  0.24500000  -0.40394586
  0.24500000  -0.40394587
  0.24500000  -0.40394588
  0.24500000  -0.40394588
  0.24600000  -0.40481057
  0.24600000  -0.40481058
  0.24600000  -0.40481059
  0.24600000  -0.40481060
  0.24600000  -0.40481061
  0.24600000  -0.40481062
  0.24600000  -0.40481063
  0.24600000  -0.40481064
  0.24600000  -0.40481065
  0.24600000  -0.40481066
  0.24600000  -0.40481067
  0.24600000  -0.40481068
  0.24600000  -0.40481069
  0.24600000  -0.40481070
  0.24600000  -0.40481071
  0.24600000  -0.40481072
  0.24600000  -0.40481073
  0.24600000  -0.40481074
  0.24600000  -0.40481075
  0.24600000  -0.40481076
  0.24600000  -0.40481077
  0.24600000  -0.40481078
  0.24600000  -0.40481079
  0.24600000  -0.40481080
  0.24600000  -0.40481081
  0.24600000  -0.40481082
  0.24600000  -0.40481083
  0.24600000  -0.40481084
  0.24600000  -0.40481085
  0.24600000  -0.40481086
  0.24600000  -0.40481086
  0.24600000  -0.40481087
  0.24600000  -0.40481088
  0.24600000  -0.40481089
  0.24600000  -0.40481090
  0.24600000  -0.40481091
  0.24600000  -0.40481092
  0.24600000  -0.40481093
  0.24600000  -0.40481094
  0.24600000  -0.40481095
  0.24700000  -0.40567235
  0.24700000  -0.40567236
  0.24700000  -0.40567237
  0.24700000  -0.40567238
  0.24700000  -0.40567239
  0.24700000  -0.40567240
  0.24700000  -0.40567241
  0.24700000  -0.40567242
  0.24700000  -0.40567243
  0.24700000  -0.40567244
  0.24700000  -0.40567245
  0.24700000  -0.40567246
  0.24700000  -0.40567247
  0.24700000  -0.40567248
  0.24700000  -0.40567249
  0.24700000  -0.40567250
  0.24700000  -0.40567251
  0.24700000  -0.40567252
  0.24700000  -0.40567253
  0.24700000  -0.40567254
  0.24700000  -0.40567255
  0.24700000  -0.40567256
  0.24700000  -0.40567257
  0.24700000  -0.40567258
  0.24700000  -0.40567259
  0.24700000  -0.40567260
  0.24700000  -0.40567261
  0.24700000  -0.40567262
  0.24700000  -0.40567263
  0.24700000  -0.40567264
  0.24700000  -0.40567264
  0.24700000  -0.40567265
  0.24700000  -0.40567266
  0.24700000  -0.40567267
  0.24700000  -0.40567268
  0.24700000  -0.40567269
  0.24700000  -0.40567270
  0.24700000  -0.40567271
  0.24700000  -0.40567272
  0.24700000  -0.40567273
  0.24800000  -0.40653087
  0.24800000  -0.40653088
  0.24800000  -0.40653089
  0.24800000  -0.40653090
  0.24800000  -0.40653091
  0.24800000  -0.40653092
  0.24800000  -0.40653093
  0.24800000  -0.40653094
  0.24800000  -0.40653095
  0.24800000  -0.40653096
  0.24800000  -0.40653097
  0.24800000  -0.40653098
  0.24800000  -0.40653099
  0.24800000  -0.40653100
  0.24800000  -0.40653101
  0.24800000  -0.40653102
  0.24800000  -0.40653103
  0.24800000  -0.40653104
  0.24800000  -0.40653105
  0.24800000  -0.40653106
  0.24800000  -0.40653107
  0.24800000  -0.40653108
  0.24800000  -0.40653109
  0.24800000  -0.40653110
  0.24800000  -0.40653111
  0.24800000  -0.40653112
  0.24800000  -0.40653113
  0.24800000  -0.40653113
  0.24800000  -0.40653114
  0.24800000  -0.40653115
  0.24800000  -0.40653116
  0.24800000  -0.40653117
  0.24800000  -0.40653118
  0.24800000  -0.40653119
  0.24800000  -0.40653120
  0.24800000  -0.40653121
  0.24800000  -0.40653122
  0.24800000  -0.40653123
  0.24800000  -0.40653124
  0.24800000  -0.40653125
  0.24900000  -0.40738615
  0.24900000  -0.40738616
  0.24900000  -0.40738617
  0.24900000  -0.40738618
  0.24900000  -0.40738619
  0.24900000  -0.40738620
  0.24900000  -0.40738621
  0.24900000  -0.40738622
  0.24900000  -0.40738623
  0.24900000  -0.40738624
  0.24900000  -0.40738625
  0.24900000  -0.40738626
  0.24900000  -0.40738627
  0.24900000  -0.40738628
  0.24900000  -0.40738629
  0.24900000  -0.40738630
  0.24900000  -0.40738631
  0.24900000  -0.40738632
  0.24900000  -0.40738633
  0.24900000  -0.40738634
  0.24900000  -0.40738635
  0.24900000  -0.40738636
  0.24900000  -0.40738637
  0.24900000  -0.40738638
  0.24900000  -0.40738639
  0.24900000  -0.40738640
  0.24900000  -0.40738641
  0.24900000  -0.40738642
  0.24900000  -0.40738643
  0.24900000  -0.40738644
  0.24900000  -0.40738645
  0.24900000  -0.40738646
  0.24900000  -0.40738647
  0.24900000  -0.40738648
  0.24900000  -0.40738649
  0.24900000  -0.40738650
  0.24900000  -0.40738650
  0.24900000  -0.40738651
  0.24900000  -0.40738652
  0.24900000  -0.40738653
  0.25000000  -0.40823822
  0.25000000  -0.40823823
  0.25000000  -0.40823824
  0.25000000  -0.40823825
  0.25000000  -0.40823826
  0.25000000  -0.40823827
  0.25000000  -0.40823828
  0.25000000  -0.40823829
  0.25000000  -0.40823830
  0.25000000  -0.40823831
  0.25000000  -0.40823832
  0.25000000  -0.40823833
  0.25000000  -0.40823834
  0.25000000  -0.40823835
  0.25000000  -0.40823836
  0.25000000  -0.40823837
  0.25000000  -0.40823838
  0.25000000  -0.40823839
  0.25000000  -0.40823840
  0.25000000  -0.40823841
  0.25000000  -0.40823842
  0.25000000  -0.40823843
  0.25000000  -0.40823844
  0.25000000  -0.40823845
  0.25000000  -0.40823846
  0.25000000  -0.40823847
  0.25000000  -0.40823848
  0.25000000  -0.40823849
  0.25000000  -0.40823850
  0.25000000  -0.40823851
  0.25000000  -0.40823852
  0.25000000  -0.40823853
  0.25000000  -0.40823854
  0.25000000  -0.40823855
  0.25000000  -0.40823856
  0.25000000  -0.40823857
  0.25000000  -0.40823858
  0.25000000  -0.40823858
  0.25000000  -0.40823859
  0.25000000  -0.40823860
  0.25100000  -0.40908710
  0.25100000  -0.40908711
  0.25100000  -0.40908712
  0.25100000  -0.40908713
  0.25100000  -0.40908714
  0.25100000  -0.40908715
  0.25100000  -0.40908716
  0.25100000  -0.40908717
  0.25100000  -0.40908718
  0.25100000  -0.40908719
  0.25100000  -0.40908720
  0.25100000  -0.40908721
  0.25100000  -0.40908722
  0.25100000  -0.40908723
  0.25100000  -0.40908724
  0.25100000  -0.40908725
  0.25100000  -0.40908726
  0.25100000  -0.40908727
  0.25100000  -0.40908728
  0.25100000  -0.40908729
  0.25100000  -0.40908730
  0.25100000  -0.40908731
  0.25100000  -0.40908732
  0.25100000  -0.40908733
  0.25100000  -0.40908734
  0.25100000  -0.40908735
  0.25100000  -0.40908736
  0.25100000  -0.40908737
  0.25100000  -0.40908738
  0.25100000  -0.40908739
  0.25100000  -0.40908740
  0.25100000  -0.40908741
  0.25100000  -0.40908742
  0.25100000  -0.40908743
  0.25100000  -0.40908744
  0.25100000  -0.40908745
  0.25100000  -0.40908746
  0.25100000  -0.40908747
  0.25100000  -0.40908748
  0.25100000  -0.40908749
  0.25200000  -0.40993281
  0.25200000  -0.40993282
  0.25200000  -0.40993283
  0.25200000  -0.40993284
  0.25200000  -0.40993285
  0.25200000  -0.40993286
  0.25200000  -0.40993287
  0.25200000  -0.40993288
  0.25200000  -0.40993289
  0.25200000  -0.40993290
  0.25200000  -0.40993291
  0.25200000  -0.40993292
  0.25200000  -0.40993293
  0.25200000  -0.40993294
  0.25200000  -0.40993295
  0.25200000  -0.40993296
  0.25200000  -0.40993297
  0.25200000  -0.40993298
  0.25200000  -0.40993299
  0.25200000  -0.40993300
  0.25200000  -0.40993301
  0.25200000  -0.40993302
  0.25200000  -0.40993303
  0.25200000  -0.40993304
  0.25200000  -0.40993305
  0.25200000  -0.40993306
  0.25200000  -0.40993307
  0.25200000  -0.40993308
  0.25200000  -0.40993309
  0.25200000  -0.40993310
  0.25200000  -0.40993311
  0.25200000  -0.40993312
  0.25200000  -0.40993313
  0.25200000  -0.40993314
  0.25200000  -0.40993315
  0.25200000  -0.40993316
  0.25200000  -0.40993317
  0.25200000  -0.40993318
  0.25200000  -0.40993319
  0.25200000  -0.40993320
  0.25300000  -0.41077538
  0.25300000  -0.41077539
  0.25300000  -0.41077540
  0.25300000  -0.41077541
  0.25300000  -0.41077542
  0.25300000  -0.41077543
  0.25300000  -0.41077544
  0.25300000  -0.41077545
  0.25300000  -0.41077546
  0.25300000  -0.41077548
  0.25300000  -0.41077549
  0.25300000  -0.41077550
  0.25300000  -0.41077551
  0.25300000  -0.41077552
  0.25300000  -0.41077553
  0.25300000  -0.41077554
  0.25300000  -0.41077555
  0.25300000  -0.41077556
  0.25300000  -0.41077557
  0.25300000  -0.41077558
  0.25300000  -0.41077559
  0.25300000  -0.41077560
  0.25300000  -0.41077561
  0.25300000  -0.41077562
  0.25300000  -0.41077563
  0.25300000  -0.41077564
  0.25300000  -0.41077565
  0.25300000  -0.41077566
  0.25300000  -0.41077567
  0.25300000  -0.41077568
  0.25300000  -0.41077569
  0.25300000  -0.41077570
  0.25300000  -0.41077571
  0.25300000  -0.41077572
  0.25300000  -0.41077573
  0.25300000  -0.41077574
  0.25300000  -0.41077575
  0.25300000  -0.41077576
  0.25300000  -0.41077577
  0.25300000  -0.41077578
  0.25400000  -0.41161483
  0.25400000  -0.41161484
  0.25400000  -0.41161485
  0.25400000  -0.41161487
  0.25400000  -0.41161488
  0.25400000  -0.41161489
  0.25400000  -0.41161490
  0.25400000  -0.41161491
  0.25400000  -0.41161492
  0.25400000  -0.41161493
  0.25400000  -0.41161494
  0.25400000  -0.41161495
  0.25400000  -0.41161496
  0.25400000  -0.41161497
  0.25400000  -0.41161498
  0.25400000  -0.41161499
  0.25400000  -0.41161500
  0.25400000  -0.41161501
  0.25400000  -0.41161502
  0.25400000  -0.41161503
  0.25400000  -0.41161504
  0.25400000  -0.41161505
  0.25400000  -0.41161506
  0.25400000  -0.41161507
  0.25400000  -0.41161508
  0.25400000  -0.41161509
  0.25400000  -0.41161510
  0.25400000  -0.41161511
  0.25400000  -0.41161512
  0.25400000  -0.41161513
  0.25400000  -0.41161514
  0.25400000  -0.41161515
  0.25400000  -0.41161516
  0.25400000  -0.41161517
  0.25400000  -0.41161518
  0.25400000  -0.41161519
  0.25400000  -0.41161520
  0.25400000  -0.41161521
  0.25400000  -0.41161522
  0.25400000  -0.41161523
  0.25500000  -0.41245119
  0.25500000  -0.41245120
  0.25500000  -0.41245121
  0.25500000  -0.41245122
  0.25500000  -0.41245123
  0.25500000  -0.41245124
  0.25500000  -0.41245125
  0.25500000  -0.41245126
  0.25500000  -0.41245127
  0.25500000  -0.41245128
  0.25500000  -0.41245129
  0.25500000  -0.41245130
  0.25500000  -0.41245131
  0.25500000  -0.41245132
  0.25500000  -0.41245133
  0.25500000  -0.41245135
  0.25500000  -0.41245136
  0.25500000  -0.41245137
  0.25500000  -0.41245138
  0.25500000  -0.41245139
  0.25500000  -0.41245140
  0.25500000  -0.41245141
  0.25500000  -0.41245142
  0.25500000  -0.41245143
  0.25500000  -0.41245144
  0.25500000  -0.41245145
  0.25500000  -0.41245146
  0.25500000  -0.41245147
  0.25500000  -0.41245148
  0.25500000  -0.41245149
  0.25500000  -0.41245150
  0.25500000  -0.41245151
  0.25500000  -0.41245152
  0.25500000  -0.41245153
  0.25500000  -0.41245154
  0.25500000  -0.41245155
  0.25500000  -0.41245156
  0.25500000  -0.41245157
  0.25500000  -0.41245158
  0.25500000  -0.41245159
  0.25600000  -0.41328447
  0.25600000  -0.41328448
  0.25600000  -0.41328449
  0.25600000  -0.41328450
  0.25600000  -0.41328451
  0.25600000  -0.41328452
  0.25600000  -0.41328453
  0.25600000  -0.41328454
  0.25600000  -0.41328455
  0.25600000  -0.41328456
  0.25600000  -0.41328457
  0.25600000  -0.41328458
  0.25600000  -0.41328459
  0.25600000  -0.41328460
  0.25600000  -0.41328462
  0.25600000  -0.41328463
  0.25600000  -0.41328464
  0.25600000  -0.41328465
  0.25600000  -0.41328466
  0.25600000  -0.41328467
  0.25600000  -0.41328468
  0.25600000  -0.41328469
  0.25600000  -0.41328470
  0.25600000  -0.41328471
  0.25600000  -0.41328472
  0.25600000  -0.41328473
  0.25600000  -0.41328474
  0.25600000  -0.41328475
  0.25600000  -0.41328476
  0.25600000  -0.41328477
  0.25600000  -0.41328478
  0.25600000  -0.41328479
  0.25600000  -0.41328480
  0.25600000  -0.41328481
  0.25600000  -0.41328482
  0.25600000  -0.41328483
  0.25600000  -0.41328484
  0.25600000  -0.41328485
  0.25600000  -0.41328486
  0.25600000  -0.41328487
  0.25700000  -0.41411470
  0.25700000  -0.41411471
  0.25700000  -0.41411472
  0.25700000  -0.41411473
  0.25700000  -0.41411474
  0.25700000  -0.41411475
  0.25700000  -0.41411476
  0.25700000  -0.41411477
  0.25700000  -0.41411478
  0.25700000  -0.41411479
  0.25700000  -0.41411480
  0.25700000  -0.41411481
  0.25700000  -0.41411482
  0.25700000  -0.41411483
  0.25700000  -0.41411484
  0.25700000  -0.41411485
  0.25700000  -0.41411486
  0.25700000  -0.41411487
  0.25700000  -0.41411488
  0.25700000  -0.41411489
  0.25700000  -0.41411490
  0.25700000  -0.41411492
  0.25700000  -0.41411493
  0.25700000  -0.41411494
  0.25700000  -0.41411495
  0.25700000  -0.41411496
  0.25700000  -0.41411497
  0.25700000  -0.41411498
  0.25700000  -0.41411499
  0.25700000  -0.41411500
  0.25700000  -0.41411501
  0.25700000  -0.41411502
  0.25700000  -0.41411503
  0.25700000  -0.41411504
  0.25700000  -0.41411505
  0.25700000  -0.41411506
  0.25700000  -0.41411507
  0.25700000  -0.41411508
  0.25700000  -0.41411509
  0.25700000  -0.41411510
  0.25800000  -0.41494189
  0.25800000  -0.41494190
  0.25800000  -0.41494191
  0.25800000  -0.41494192
  0.25800000  -0.41494193
  0.25800000  -0.41494194
  0.25800000  -0.41494196
  0.25800000  -0.41494197
  0.25800000  -0.41494198
  0.25800000  -0.41494199
  0.25800000  -0.41494200
  0.25800000  -0.41494201
  0.25800000  -0.41494202
  0.25800000  -0.41494203
  0.25800000  -0.41494204
  0.25800000  -0.41494205
  0.25800000  -0.41494206
  0.25800000  -0.41494207
  0.25800000  -0.41494208
  0.25800000  -0.41494209
  0.25800000  -0.41494210
  0.25800000  -0.41494211
  0.25800000  -0.41494212
  0.25800000  -0.41494213
  0.25800000  -0.41494214
  0.25800000  -0.41494215
  0.25800000  -0.41494216
  0.25800000  -0.41494217
  0.25800000  -0.41494218
  0.25800000  -0.41494219
  0.25800000  -0.41494220
  0.25800000  -0.41494221
  0.25800000  -0.41494222
  0.25800000  -0.41494223
  0.25800000  -0.41494224
  0.25800000  -0.41494225
  0.25800000  -0.41494226
  0.25800000  -0.41494227
  0.25800000  -0.41494228
  0.25800000  -0.41494229
  0.25900000  -0.41576608
  0.25900000  -0.41576609
  0.25900000  -0.41576610
  0.25900000  -0.41576611
  0.25900000  -0.41576612
  0.25900000  -0.41576613
  0.25900000  -0.41576614
  0.25900000  -0.41576615
  0.25900000  -0.41576616
  0.25900000  -0.41576617
  0.25900000  -0.41576618
  0.25900000  -0.41576619
  0.25900000  -0.41576620
  0.25900000  -0.41576622
  0.25900000  -0.41576623
  0.25900000  -0.41576624
  0.25900000  -0.41576625
  0.25900000  -0.41576626
  0.25900000  -0.41576627
  0.25900000  -0.41576628
  0.25900000  -0.41576629
  0.25900000  -0.41576630
  0.25900000  -0.41576631
  0.25900000  -0.41576632
  0.25900000  -0.41576633
  0.25900000  -0.41576634
  0.25900000  -0.41576635
  0.25900000  -0.41576636
  0.25900000  -0.41576637
  0.25900000  -0.41576638
  0.25900000  -0.41576639
  0.25900000  -0.41576640
  0.25900000  -0.41576641
  0.25900000  -0.41576642
  0.25900000  -0.41576643
  0.25900000  -0.41576644
  0.25900000  -0.41576645
  0.25900000  -0.41576646
  0.25900000  -0.41576647
  0.25900000  -0.41576648
  0.26000000  -0.41658727
  0.26000000  -0.41658729
  0.26000000  -0.41658730
  0.26000000  -0.41658731
  0.26000000  -0.41658732
  0.26000000  -0.41658733
  0.26000000  -0.41658734
  0.26000000  -0.41658735
  0.26000000  -0.41658736
  0.26000000  -0.41658737
  0.26000000  -0.41658738
  0.26000000  -0.41658739
  0.26000000  -0.41658740
  0.26000000  -0.41658741
  0.26000000  -0.41658742
  0.26000000  -0.41658743
  0.26000000  -0.41658744
  0.26000000  -0.41658745
  0.26000000  -0.41658747
  0.26000000  -0.41658748
  0.26000000  -0.41658749
  0.26000000  -0.41658750
  0.26000000  -0.41658751
  0.26000000  -0.41658752
  0.26000000  -0.41658753
  0.26000000  -0.41658754
  0.26000000  -0.41658755
  0.26000000  -0.41658756
  0.26000000  -0.41658757
  0.26000000  -0.41658758
  0.26000000  -0.41658759
  0.26000000  -0.41658760
  0.26000000  -0.41658761
  0.26000000  -0.41658762
  0.26000000  -0.41658763
  0.26000000  -0.41658764
  0.26000000  -0.41658765
  0.26000000  -0.41658766
  0.26000000  -0.41658767
  0.26000000  -0.41658768
  0.26100000  -0.41740550
  0.26100000  -0.41740551
  0.26100000  -0.41740553
  0.26100000  -0.41740554
  0.26100000  -0.41740555
  0.26100000  -0.41740556
  0.26100000  -0.41740557
  0.26100000  -0.41740558
  0.26100000  -0.41740559
  0.26100000  -0.41740560
  0.26100000  -0.41740561
  0.26100000  -0.41740562
  0.26100000  -0.41740563
  0.26100000  -0.41740564
  0.26100000  -0.41740565
  0.26100000  -0.41740566
  0.26100000  -0.41740567
  0.26100000  -0.41740569
  0.26100000  -0.41740570
  0.26100000  -0.41740571
  0.26100000  -0.41740572
  0.26100000  -0.41740573
  0.26100000  -0.41740574
  0.26100000  -0.41740575
  0.26100000  -0.41740576
  0.26100000  -0.41740577
  0.26100000  -0.41740578
  0.26100000  -0.41740579
  0.26100000  -0.41740580
  0.26100000  -0.41740581
  0.26100000  -0.41740582
  0.26100000  -0.41740583
  0.26100000  -0.41740584
  0.26100000  -0.41740585
  0.26100000  -0.41740586
  0.26100000  -0.41740587
  0.26100000  -0.41740588
  0.26100000  -0.41740589
  0.26100000  -0.41740590
  0.26100000  -0.41740591
  0.26200000  -0.41822079
  0.26200000  -0.41822080
  0.26200000  -0.41822081
  0.26200000  -0.41822082
  0.26200000  -0.41822083
  0.26200000  -0.41822084
  0.26200000  -0.41822085
  0.26200000  -0.41822086
  0.26200000  -0.41822087
  0.26200000  -0.41822088
  0.26200000  -0.41822089
  0.26200000  -0.41822091
  0.26200000  -0.41822092
  0.26200000  -0.41822093
  0.26200000  -0.41822094
  0.26200000  -0.41822095
  0.26200000  -0.41822096
  0.26200000  -0.41822097
  0.26200000  -0.41822098
  0.26200000  -0.41822099
  0.26200000  -0.41822100
  0.26200000  -0.41822101
  0.26200000  -0.41822102
  0.26200000  -0.41822103
  0.26200000  -0.41822104
  0.26200000  -0.41822105
  0.26200000  -0.41822106
  0.26200000  -0.41822107
  0.26200000  -0.41822108
  0.26200000  -0.41822109
  0.26200000  -0.41822110
  0.26200000  -0.41822111
  0.26200000  -0.41822112
  0.26200000  -0.41822113
  0.26200000  -0.41822115
  0.26200000  -0.41822116
  0.26200000  -0.41822117
  0.26200000  -0.41822118
  0.26200000  -0.41822119
  0.26200000  -0.41822120
  0.26300000  -0.41903314
  0.26300000  -0.41903315
  0.26300000  -0.41903317
  0.26300000  -0.41903318
  0.26300000  -0.41903319
  0.26300000  -0.41903320
  0.26300000  -0.41903321
  0.26300000  -0.41903322
  0.26300000  -0.41903323
  0.26300000  -0.41903324
  0.26300000  -0.41903325
  0.26300000  -0.41903326
  0.26300000  -0.41903327
  0.26300000  -0.41903328
  0.26300000  -0.41903329
  0.26300000  -0.41903331
  0.26300000  -0.41903332
  0.26300000  -0.41903333
  0.26300000  -0.41903334
  0.26300000  -0.41903335
  0.26300000  -0.41903336
  0.26300000  -0.41903337
  0.26300000  -0.41903338
  0.26300000  -0.41903339
  0.26300000  -0.41903340
  0.26300000  -0.41903341
  0.26300000  -0.41903342
  0.26300000  -0.41903343
  0.26300000  -0.41903344
  0.26300000  -0.41903345
  0.26300000  -0.41903346
  0.26300000  -0.41903347
  0.26300000  -0.41903348
  0.26300000  -0.41903349
  0.26300000  -0.41903350
  0.26300000  -0.41903351
  0.26300000  -0.41903352
  0.26300000  -0.41903353
  0.26300000  -0.41903354
  0.26300000  -0.41903355
  0.26400000  -0.41984259
  0.26400000  -0.41984261
  0.26400000  -0.41984262
  0.26400000  -0.41984263
  0.26400000  -0.41984264
  0.26400000  -0.41984265
  0.26400000  -0.41984266
  0.26400000  -0.41984267
  0.26400000  -0.41984268
  0.26400000  -0.41984269
  0.26400000  -0.41984270
  0.26400000  -0.41984271
  0.26400000  -0.41984272
  0.26400000  -0.41984274
  0.26400000  -0.41984275
  0.26400000  -0.41984276
  0.26400000  -0.41984277
  0.26400000  -0.41984278
  0.26400000  -0.41984279
  0.26400000  -0.41984280
  0.26400000  -0.41984281
  0.26400000  -0.41984282
  0.26400000  -0.41984283
  0.26400000  -0.41984284
  0.26400000  -0.41984285
  0.26400000  -0.41984286
  0.26400000  -0.41984287
  0.26400000  -0.41984288
  0.26400000  -0.41984289
  0.26400000  -0.41984290
  0.26400000  -0.41984291
  0.26400000  -0.41984292
  0.26400000  -0.41984293
  0.26400000  -0.41984294
  0.26400000  -0.41984296
  0.26400000  -0.41984297
  0.26400000  -0.41984298
  0.26400000  -0.41984299
  0.26400000  -0.41984300
  0.26400000  -0.41984301
  0.26500000  -0.42064916
  0.26500000  -0.42064917
  0.26500000  -0.42064918
  0.26500000  -0.42064919
  0.26500000  -0.42064920
  0.26500000  -0.42064921
  0.26500000  -0.42064923
  0.26500000  -0.42064924
  0.26500000  -0.42064925
  0.26500000  -0.42064926
  0.26500000  -0.42064927
  0.26500000  -0.42064928
  0.26500000  -0.42064929
  0.26500000  -0.42064930
  0.26500000  -0.42064931
  0.26500000  -0.42064932
  0.26500000  -0.42064933
  0.26500000  -0.42064934
  0.26500000  -0.42064935
  0.26500000  -0.42064936
  0.26500000  -0.42064938
  0.26500000  -0.42064939
  0.26500000  -0.42064940
  0.26500000  -0.42064941
  0.26500000  -0.42064942
  0.26500000  -0.42064943
  0.26500000  -0.42064944
  0.26500000  -0.42064945
  0.26500000  -0.42064946
  0.26500000  -0.42064947
  0.26500000  -0.42064948
  0.26500000  -0.42064949
  0.26500000  -0.42064950
  0.26500000  -0.42064951
  0.26500000  -0.42064952
  0.26500000  -0.42064953
  0.26500000  -0.42064954
  0.26500000  -0.42064955
  0.26500000  -0.42064956
  0.26500000  -0.42064957
  0.26600000  -0.42145286
  0.26600000  -0.42145287
  0.26600000  -0.42145288
  0.26600000  -0.42145289
  0.26600000  -0.42145290
  0.26600000  -0.42145291
  0.26600000  -0.42145292
  0.26600000  -0.42145293
  0.26600000  -0.42145295
  0.26600000  -0.42145296
  0.26600000  -0.42145297
  0.26600000  -0.42145298
  0.26600000  -0.42145299
  0.26600000  -0.42145300
  0.26600000  -0.42145301
  0.26600000  -0.42145302
  0.26600000  -0.42145303
  0.26600000  -0.42145304
  0.26600000  -0.42145305
  0.26600000  -0.42145306
  0.26600000  -0.42145307
  0.26600000  -0.42145309
  0.26600000  -0.42145310
  0.26600000  -0.42145311
  0.26600000  -0.42145312
  0.26600000  -0.42145313
  0.26600000  -0.42145314
  0.26600000  -0.42145315
  0.26600000  -0.42145316
  0.26600000  -0.42145317
  0.26600000  -0.42145318
  0.26600000  -0.42145319
  0.26600000  -0.42145320
  0.26600000  -0.42145321
  0.26600000  -0.42145322
  0.26600000  -0.42145323
  0.26600000  -0.42145324
  0.26600000  -0.42145325
  0.26600000  -0.42145326
  0.26600000  -0.42145327
  0.26700000  -0.42225371
  0.26700000  -0.42225372
  0.26700000  -0.42225373
  0.26700000  -0.42225374
  0.26700000  -0.42225375
  0.26700000  -0.42225377
  0.26700000  -0.42225378
  0.26700000  -0.42225379
  0.26700000  -0.42225380
  0.26700000  -0.42225381
  0.26700000  -0.42225382
  0.26700000  -0.42225383
  0.26700000  -0.42225384
  0.26700000  -0.42225385
  0.26700000  -0.42225386
  0.26700000  -0.42225387
  0.26700000  -0.42225389
  0.26700000  -0.42225390
  0.26700000  -0.42225391
  0.26700000  -0.42225392
  0.26700000  -0.42225393
  0.26700000  -0.42225394
  0.26700000  -0.42225395
  0.26700000  -0.42225396
  0.26700000  -0.42225397
  0.26700000  -0.42225398
  0.26700000  -0.42225399
  0.26700000  -0.42225400
  0.26700000  -0.42225401
  0.26700000  -0.42225402
  0.26700000  -0.42225403
  0.26700000  -0.42225404
  0.26700000  -0.42225405
  0.26700000  -0.42225406
  0.26700000  -0.42225407
  0.26700000  -0.42225409
  0.26700000  -0.42225410
  0.26700000  -0.42225411
  0.26700000  -0.42225412
  0.26700000  -0.42225413
  0.26800000  -0.42305174
  0.26800000  -0.42305175
  0.26800000  -0.42305176
  0.26800000  -0.42305177
  0.26800000  -0.42305178
  0.26800000  -0.42305179
  0.26800000  -0.42305180
  0.26800000  -0.42305181
  0.26800000  -0.42305182
  0.26800000  -0.42305183
  0.26800000  -0.42305185
  0.26800000  -0.42305186
  0.26800000  -0.42305187
  0.26800000  -0.42305188
  0.26800000  -0.42305189
  0.26800000  -0.42305190
  0.26800000  -0.42305191
  0.26800000  -0.42305192
  0.26800000  -0.42305193
  0.26800000  -0.42305194
  0.26800000  -0.42305195
  0.26800000  -0.42305196
  0.26800000  -0.42305198
  0.26800000  -0.42305199
  0.26800000  -0.42305200
  0.26800000  -0.42305201
  0.26800000  -0.42305202
  0.26800000  -0.42305203
  0.26800000  -0.42305204
  0.26800000  -0.42305205
  0.26800000  -0.42305206
  0.26800000  -0.42305207
  0.26800000  -0.42305208
  0.26800000  -0.42305209
  0.26800000  -0.42305210
  0.26800000  -0.42305211
  0.26800000  -0.42305212
  0.26800000  -0.42305213
  0.26800000  -0.42305214
  0.26800000  -0.42305215
  0.26900000  -0.42384695
  0.26900000  -0.42384696
  0.26900000  -0.42384698
  0.26900000  -0.42384699
  0.26900000  -0.42384700
  0.26900000  -0.42384701
  0.26900000  -0.42384702
  0.26900000  -0.42384703
  0.26900000  -0.42384704
  0.26900000  -0.42384705
  0.26900000  -0.42384706
  0.26900000  -0.42384707
  0.26900000  -0.42384709
  0.26900000  -0.42384710
  0.26900000  -0.42384711
  0.26900000  -0.42384712
  0.26900000  -0.42384713
  0.26900000  -0.42384714
  0.26900000  -0.42384715
  0.26900000  -0.42384716
  0.26900000  -0.42384717
  0.26900000  -0.42384718
  0.26900000  -0.42384719
  0.26900000  -0.42384720
  0.26900000  -0.42384721
  0.26900000  -0.42384723
  0.26900000  -0.42384724
  0.26900000  -0.42384725
  0.26900000  -0.42384726
  0.26900000  -0.42384727
  0.26900000  -0.42384728
  0.26900000  -0.42384729
  0.26900000  -0.42384730
  0.26900000  -0.42384731
  0.26900000  -0.42384732
  0.26900000  -0.42384733
  0.26900000  -0.42384734
  0.26900000  -0.42384735
  0.26900000  -0.42384736
  0.26900000  -0.42384737
  0.27000000  -0.42463938
  0.27000000  -0.42463939
  0.27000000  -0.42463940
  0.27000000  -0.42463941
  0.27000000  -0.42463943
  0.27000000  -0.42463944
  0.27000000  -0.42463945
  0.27000000  -0.42463946
  0.27000000  -0.42463947
  0.27000000  -0.42463948
  0.27000000  -0.42463949
  0.27000000  -0.42463950
  0.27000000  -0.42463951
  0.27000000  -0.42463953
  0.27000000  -0.42463954
  0.27000000  -0.42463955
  0.27000000  -0.42463956
  0.27000000  -0.42463957
  0.27000000  -0.42463958
  0.27000000  -0.42463959
  0.27000000  -0.42463960
  0.27000000  -0.42463961
  0.27000000  -0.42463962
  0.27000000  -0.42463963
  0.27000000  -0.42463964
  0.27000000  -0.42463965
  0.27000000  -0.42463967
  0.27000000  -0.42463968
  0.27000000  -0.42463969
  0.27000000  -0.42463970
  0.27000000  -0.42463971
  0.27000000  -0.42463972
  0.27000000  -0.42463973
  0.27000000  -0.42463974
  0.27000000  -0.42463975
  0.27000000  -0.42463976
  0.27000000  -0.42463977
  0.27000000  -0.42463978
  0.27000000  -0.42463979
  0.27000000  -0.42463980
  0.27100000  -0.42542904
  0.27100000  -0.42542905
  0.27100000  -0.42542906
  0.27100000  -0.42542907
  0.27100000  -0.42542908
  0.27100000  -0.42542910
  0.27100000  -0.42542911
  0.27100000  -0.42542912
  0.27100000  -0.42542913
  0.27100000  -0.42542914
  0.27100000  -0.42542915
  0.27100000  -0.42542916
  0.27100000  -0.42542917
  0.27100000  -0.42542918
  0.27100000  -0.42542919
  0.27100000  -0.42542921
  0.27100000  -0.42542922
  0.27100000  -0.42542923
  0.27100000  -0.42542924
  0.27100000  -0.42542925
  0.27100000  -0.42542926
  0.27100000  -0.42542927
  0.27100000  -0.42542928
  0.27100000  -0.42542929
  0.27100000  -0.42542930
  0.27100000  -0.42542931
  0.27100000  -0.42542932
  0.27100000  -0.42542934
  0.27100000  -0.42542935
  0.27100000  -0.42542936
  0.27100000  -0.42542937
  0.27100000  -0.42542938
  0.27100000  -0.42542939
  0.27100000  -0.42542940
  0.27100000  -0.42542941
  0.27100000  -0.42542942
  0.27100000  -0.42542943
  0.27100000  -0.42542944
  0.27100000  -0.42542945
  0.27100000  -0.42542946
  0.27200000  -0.42621595
  0.27200000  -0.42621596
  0.27200000  -0.42621597
  0.27200000  -0.42621598
  0.27200000  -0.42621599
  0.27200000  -0.42621600
  0.27200000  -0.42621601
  0.27200000  -0.42621602
  0.27200000  -0.42621604
  0.27200000  -0.42621605
  0.27200000  -0.42621606
  0.27200000  -0.42621607
  0.27200000  -0.42621608
  0.27200000  -0.42621609
  0.27200000  -0.42621610
  0.27200000  -0.42621611
  0.27200000  -0.42621612
  0.27200000  -0.42621613
  0.27200000  -0.42621615
  0.27200000  -0.42621616
  0.27200000  -0.42621617
  0.27200000  -0.42621618
  0.27200000  -0.42621619
  0.27200000  -0.42621620
  0.27200000  -0.42621621
  0.27200000  -0.42621622
  0.27200000  -0.42621623
  0.27200000  -0.42621624
  0.27200000  -0.42621625
  0.27200000  -0.42621626
  0.27200000  -0.42621627
  0.27200000  -0.42621629
  0.27200000  -0.42621630
  0.27200000  -0.42621631
  0.27200000  -0.42621632
  0.27200000  -0.42621633
  0.27200000  -0.42621634
  0.27200000  -0.42621635
  0.27200000  -0.42621636
  0.27200000  -0.42621637
  0.27300000  -0.42700012
  0.27300000  -0.42700013
  0.27300000  -0.42700014
  0.27300000  -0.42700015
  0.27300000  -0.42700016
  0.27300000  -0.42700018
  0.27300000  -0.42700019
  0.27300000  -0.42700020
  0.27300000  -0.42700021
  0.27300000  -0.42700022
  0.27300000  -0.42700023
  0.27300000  -0.42700024
  0.27300000  -0.42700025
  0.27300000  -0.42700026
  0.27300000  -0.42700028
  0.27300000  -0.42700029
  0.27300000  -0.42700030
  0.27300000  -0.42700031
  0.27300000  -0.42700032
  0.27300000  -0.42700033
  0.27300000  -0.42700034
  0.27300000  -0.42700035
  0.27300000  -0.42700036
  0.27300000  -0.42700037
  0.27300000  -0.42700038
  0.27300000  -0.42700040
  0.27300000  -0.42700041
  0.27300000  -0.42700042
  0.27300000  -0.42700043
  0.27300000  -0.42700044
  0.27300000  -0.42700045
  0.27300000  -0.42700046
  0.27300000  -0.42700047
  0.27300000  -0.42700048
  0.27300000  -0.42700049
  0.27300000  -0.42700050
  0.27300000  -0.42700051
  0.27300000  -0.42700052
  0.27300000  -0.42700053
  0.27300000  -0.42700054
  0.27400000  -0.42778158
  0.27400000  -0.42778159
  0.27400000  -0.42778160
  0.27400000  -0.42778161
  0.27400000  -0.42778162
  0.27400000  -0.42778163
  0.27400000  -0.42778165
  0.27400000  -0.42778166
  0.27400000  -0.42778167
  0.27400000  -0.42778168
  0.27400000  -0.42778169
  0.27400000  -0.42778170
  0.27400000  -0.42778171
  0.27400000  -0.42778172
  0.27400000  -0.42778173
  0.27400000  -0.42778175
  0.27400000  -0.42778176
  0.27400000  -0.42778177
  0.27400000  -0.42778178
  0.27400000  -0.42778179
  0.27400000  -0.42778180
  0.27400000  -0.42778181
  0.27400000  -0.42778182
  0.27400000  -0.42778183
  0.27400000  -0.42778184
  0.27400000  -0.42778185
  0.27400000  -0.42778187
  0.27400000  -0.42778188
  0.27400000  -0.42778189
  0.27400000  -0.42778190
  0.27400000  -0.42778191
  0.27400000  -0.42778192
  0.27400000  -0.42778193
  0.27400000  -0.42778194
  0.27400000  -0.42778195
  0.27400000  -0.42778196
  0.27400000  -0.42778197
  0.27400000  -0.42778198
  0.27400000  -0.42778199
  0.27400000  -0.42778200
  0.27500000  -0.42856034
  0.27500000  -0.42856035
  0.27500000  -0.42856036
  0.27500000  -0.42856037
  0.27500000  -0.42856038
  0.27500000  -0.42856040
  0.27500000  -0.42856041
  0.27500000  -0.42856042
  0.27500000  -0.42856043
  0.27500000  -0.42856044
  0.27500000  -0.42856045
  0.27500000  -0.42856046
  0.27500000  -0.42856047
  0.27500000  -0.42856049
  0.27500000  -0.42856050
  0.27500000  -0.42856051
  0.27500000  -0.42856052
  0.27500000  -0.42856053
  0.27500000  -0.42856054
  0.27500000  -0.42856055
  0.27500000  -0.42856056
  0.27500000  -0.42856057
  0.27500000  -0.42856058
  0.27500000  -0.42856060
  0.27500000  -0.42856061
  0.27500000  -0.42856062
  0.27500000  -0.42856063
  0.27500000  -0.42856064
  0.27500000  -0.42856065
  0.27500000  -0.42856066
  0.27500000  -0.42856067
  0.27500000  -0.42856068
  0.27500000  -0.42856069
  0.27500000  -0.42856070
  0.27500000  -0.42856071
  0.27500000  -0.42856072
  0.27500000  -0.42856073
  0.27500000  -0.42856075
  0.27500000  -0.42856076
  0.27500000  -0.42856077
  0.27600000  -0.42933642
  0.27600000  -0.42933643
  0.27600000  -0.42933644
  0.27600000  -0.42933646
  0.27600000  -0.42933647
  0.27600000  -0.42933648
  0.27600000  -0.42933649
  0.27600000  -0.42933650
  0.27600000  -0.42933651
  0.27600000  -0.42933652
  0.27600000  -0.42933653
  0.27600000  -0.42933655
  0.27600000  -0.42933656
  0.27600000  -0.42933657
  0.27600000  -0.42933658
  0.27600000  -0.42933659
  0.27600000  -0.42933660
  0.27600000  -0.42933661
  0.27600000  -0.42933662
  0.27600000  -0.42933663
  0.27600000  -0.42933665
  0.27600000  -0.42933666
  0.27600000  -0.42933667
  0.27600000  -0.42933668
  0.27600000  -0.42933669
  0.27600000  -0.42933670
  0.27600000  -0.42933671
  0.27600000  -0.42933672
  0.27600000  -0.42933673
  0.27600000  -0.42933674
  0.27600000  -0.42933675
  0.27600000  -0.42933676
  0.27600000  -0.42933678
  0.27600000  -0.42933679
  0.27600000  -0.42933680
  0.27600000  -0.42933681
  0.27600000  -0.42933682
  0.27600000  -0.42933683
  0.27600000  -0.42933684
  0.27600000  -0.42933685
  0.27700000  -0.43010984
  0.27700000  -0.43010985
  0.27700000  -0.43010986
  0.27700000  -0.43010988
  0.27700000  -0.43010989
  0.27700000  -0.43010990
  0.27700000  -0.43010991
  0.27700000  -0.43010992
  0.27700000  -0.43010993
  0.27700000  -0.43010994
  0.27700000  -0.43010996
  0.27700000  -0.43010997
  0.27700000  -0.43010998
  0.27700000  -0.43010999
  0.27700000  -0.43011000
  0.27700000  -0.43011001
  0.27700000  -0.43011002
  0.27700000  -0.43011003
  0.27700000  -0.43011004
  0.27700000  -0.43011006
  0.27700000  -0.43011007
  0.27700000  -0.43011008
  0.27700000  -0.43011009
  0.27700000  -0.43011010
  0.27700000  -0.43011011
  0.27700000  -0.43011012
  0.27700000  -0.43011013
  0.27700000  -0.43011014
  0.27700000  -0.43011015
  0.27700000  -0.43011016
  0.27700000  -0.43011018
  0.27700000  -0.43011019
  0.27700000  -0.43011020
  0.27700000  -0.43011021
  0.27700000  -0.43011022
  0.27700000  -0.43011023
  0.27700000  -0.43011024
  0.27700000  -0.43011025
  0.27700000  -0.43011026
  0.27700000  -0.43011027
  0.27800000  -0.43088062
  0.27800000  -0.43088063
  0.27800000  -0.43088064
  0.27800000  -0.43088065
  0.27800000  -0.43088066
  0.27800000  -0.43088067
  0.27800000  -0.43088069
  0.27800000  -0.43088070
  0.27800000  -0.43088071
  0.27800000  -0.43088072
  0.27800000  -0.43088073
  0.27800000  -0.43088074
  0.27800000  -0.43088075
  0.27800000  -0.43088077
  0.27800000  -0.43088078
  0.27800000  -0.43088079
  0.27800000  -0.43088080
  0.27800000  -0.43088081
  0.27800000  -0.43088082
  0.27800000  -0.43088083
  0.27800000  -0.43088084
  0.27800000  -0.43088085
  0.27800000  -0.43088087
  0.27800000  -0.43088088
  0.27800000  -0.43088089
  0.27800000  -0.43088090
  0.27800000  -0.43088091
  0.27800000  -0.43088092
  0.27800000  -0.43088093
  0.27800000  -0.43088094
  0.27800000  -0.43088095
  0.27800000  -0.43088096
  0.27800000  -0.43088097
  0.27800000  -0.43088098
  0.27800000  -0.43088100
  0.27800000  -0.43088101
  0.27800000  -0.43088102
  0.27800000  -0.43088103
  0.27800000  -0.43088104
  0.27800000  -0.43088105
  0.27900000  -0.43164877
  0.27900000  -0.43164878
  0.27900000  -0.43164879
  0.27900000  -0.43164880
  0.27900000  -0.43164881
  0.27900000  -0.43164882
  0.27900000  -0.43164884
  0.27900000  -0.43164885
  0.27900000  -0.43164886
  0.27900000  -0.43164887
  0.27900000  -0.43164888
  0.27900000  -0.43164889
  0.27900000  -0.43164890
  0.27900000  -0.43164891
  0.27900000  -0.43164893
  0.27900000  -0.43164894
  0.27900000  -0.43164895
  0.27900000  -0.43164896
  0.27900000  -0.43164897
  0.27900000  -0.43164898
  0.27900000  -0.43164899
  0.27900000  -0.43164900
  0.27900000  -0.43164902
  0.27900000  -0.43164903
  0.27900000  -0.43164904
  0.27900000  -0.43164905
  0.27900000  -0.43164906
  0.27900000  -0.43164907
  0.27900000  -0.43164908
  0.27900000  -0.43164909
  0.27900000  -0.43164910
  0.27900000  -0.43164911
  0.27900000  -0.43164912
  0.27900000  -0.43164914
  0.27900000  -0.43164915
  0.27900000  -0.43164916
  0.27900000  -0.43164917
  0.27900000  -0.43164918
  0.27900000  -0.43164919
  0.27900000  -0.43164920
  0.28000000  -0.43241431
  0.28000000  -0.43241432
  0.28000000  -0.43241433
  0.28000000  -0.43241434
  0.28000000  -0.43241435
  0.28000000  -0.43241436
  0.28000000  -0.43241437
  0.28000000  -0.43241439
  0.28000000  -0.43241440
  0.28000000  -0.43241441
  0.28000000  -0.43241442
  0.28000000  -0.43241443
  0.28000000  -0.43241444
  0.28000000  -0.43241445
  0.28000000  -0.43241447
  0.28000000  -0.43241448
  0.28000000  -0.43241449
  0.28000000  -0.43241450
  0.28000000  -0.43241451
  0.28000000  -0.43241452
  0.28000000  -0.43241453
  0.28000000  -0.43241454
  0.28000000  -0.43241455
  0.28000000  -0.43241457
  0.28000000  -0.43241458
  0.28000000  -0.43241459
  0.28000000  -0.43241460
  0.28000000  -0.43241461
  0.28000000  -0.43241462
  0.28000000  -0.43241463
  0.28000000  -0.43241464
  0.28000000  -0.43241465
  0.28000000  -0.43241466
  0.28000000  -0.43241468
  0.28000000  -0.43241469
  0.28000000  -0.43241470
  0.28000000  -0.43241471
  0.28000000  -0.43241472
  0.28000000  -0.43241473
  0.28000000  -0.43241474
  0.28100000  -0.43317725
  0.28100000  -0.43317726
  0.28100000  -0.43317727
  0.28100000  -0.43317729
  0.28100000  -0.43317730
  0.28100000  -0.43317731
  0.28100000  -0.43317732
  0.28100000  -0.43317733
  0.28100000  -0.43317734
  0.28100000  -0.43317736
  0.28100000  -0.43317737
  0.28100000  -0.43317738
  0.28100000  -0.43317739
  0.28100000  -0.43317740
  0.28100000  -0.43317741
  0.28100000  -0.43317742
  0.28100000  -0.43317743
  0.28100000  -0.43317745
  0.28100000  -0.43317746
  0.28100000  -0.43317747
  0.28100000  -0.43317748
  0.28100000  -0.43317749
  0.28100000  -0.43317750
  0.28100000  -0.43317751
  0.28100000  -0.43317752
  0.28100000  -0.43317753
  0.28100000  -0.43317755
  0.28100000  -0.43317756
  0.28100000  -0.43317757
  0.28100000  -0.43317758
  0.28100000  -0.43317759
  0.28100000  -0.43317760
  0.28100000  -0.43317761
  0.28100000  -0.43317762
  0.28100000  -0.43317763
  0.28100000  -0.43317764
  0.28100000  -0.43317765
  0.28100000  -0.43317767
  0.28100000  -0.43317768
  0.28100000  -0.43317769
  0.28200000  -0.43393762
  0.28200000  -0.43393763
  0.28200000  -0.43393764
  0.28200000  -0.43393766
  0.28200000  -0.43393767
  0.28200000  -0.43393768
  0.28200000  -0.43393769
  0.28200000  -0.43393770
  0.28200000  -0.43393771
  0.28200000  -0.43393772
  0.28200000  -0.43393774
  0.28200000  -0.43393775
  0.28200000  -0.43393776
  0.28200000  -0.43393777
  0.28200000  -0.43393778
  0.28200000  -0.43393779
  0.28200000  -0.43393780
  0.28200000  -0.43393782
  0.28200000  -0.43393783
  0.28200000  -0.43393784
  0.28200000  -0.43393785
  0.28200000  -0.43393786
  0.28200000  -0.43393787
  0.28200000  -0.43393788
  0.28200000  -0.43393789
  0.28200000  -0.43393790
  0.28200000  -0.43393792
  0.28200000  -0.43393793
  0.28200000  -0.43393794
  0.28200000  -0.43393795
  0.28200000  -0.43393796
  0.28200000  -0.43393797
  0.28200000  -0.43393798
  0.28200000  -0.43393799
  0.28200000  -0.43393800
  0.28200000  -0.43393801
  0.28200000  -0.43393802
  0.28200000  -0.43393804
  0.28200000  -0.43393805
  0.28200000  -0.43393806
  0.28300000  -0.43469543
  0.28300000  -0.43469544
  0.28300000  -0.43469545
  0.28300000  -0.43469547
  0.28300000  -0.43469548
  0.28300000  -0.43469549
  0.28300000  -0.43469550
  0.28300000  -0.43469551
  0.28300000  -0.43469552
  0.28300000  -0.43469553
  0.28300000  -0.43469555
  0.28300000  -0.43469556
  0.28300000  -0.43469557
  0.28300000  -0.43469558
  0.28300000  -0.43469559
  0.28300000  -0.43469560
  0.28300000  -0.43469561
  0.28300000  -0.43469563
  0.28300000  -0.43469564
  0.28300000  -0.43469565
  0.28300000  -0.43469566
  0.28300000  -0.43469567
  0.28300000  -0.43469568
  0.28300000  -0.43469569
  0.28300000  -0.43469570
  0.28300000  -0.43469571
  0.28300000  -0.43469573
  0.28300000  -0.43469574
  0.28300000  -0.43469575
  0.28300000  -0.43469576
  0.28300000  -0.43469577
  0.28300000  -0.43469578
  0.28300000  -0.43469579
  0.28300000  -0.43469580
  0.28300000  -0.43469581
  0.28300000  -0.43469582
  0.28300000  -0.43469584
  0.28300000  -0.43469585
  0.28300000  -0.43469586
  0.28300000  -0.43469587
  0.28400000  -0.43545070
  0.28400000  -0.43545071
  0.28400000  -0.43545072
  0.28400000  -0.43545073
  0.28400000  -0.43545074
  0.28400000  -0.43545075
  0.28400000  -0.43545077
  0.28400000  -0.43545078
  0.28400000  -0.43545079
  0.28400000  -0.43545080
  0.28400000  -0.43545081
  0.28400000  -0.43545082
  0.28400000  -0.43545083
  0.28400000  -0.43545085
  0.28400000  -0.43545086
  0.28400000  -0.43545087
  0.28400000  -0.43545088
  0.28400000  -0.43545089
  0.28400000  -0.43545090
  0.28400000  -0.43545091
  0.28400000  -0.43545093
  0.28400000  -0.43545094
  0.28400000  -0.43545095
  0.28400000  -0.43545096
  0.28400000  -0.43545097
  0.28400000  -0.43545098
  0.28400000  -0.43545099
  0.28400000  -0.43545100
  0.28400000  -0.43545101
  0.28400000  -0.43545103
  0.28400000  -0.43545104
  0.28400000  -0.43545105
  0.28400000  -0.43545106
  0.28400000  -0.43545107
  0.28400000  -0.43545108
  0.28400000  -0.43545109
  0.28400000  -0.43545110
  0.28400000  -0.43545111
  0.28400000  -0.43545112
  0.28400000  -0.43545114
  0.28500000  -0.43620343
  0.28500000  -0.43620345
  0.28500000  -0.43620346
  0.28500000  -0.43620347
  0.28500000  -0.43620348
  0.28500000  -0.43620349
  0.28500000  -0.43620350
  0.28500000  -0.43620352
  0.28500000  -0.43620353
  0.28500000  -0.43620354
  0.28500000  -0.43620355
  0.28500000  -0.43620356
  0.28500000  -0.43620357
  0.28500000  -0.43620359
  0.28500000  -0.43620360
  0.28500000  -0.43620361
  0.28500000  -0.43620362
  0.28500000  -0.43620363
  0.28500000  -0.43620364
  0.28500000  -0.43620365
  0.28500000  -0.43620366
  0.28500000  -0.43620368
  0.28500000  -0.43620369
  0.28500000  -0.43620370
  0.28500000  -0.43620371
  0.28500000  -0.43620372
  0.28500000  -0.43620373
  0.28500000  -0.43620374
  0.28500000  -0.43620375
  0.28500000  -0.43620377
  0.28500000  -0.43620378
  0.28500000  -0.43620379
  0.28500000  -0.43620380
  0.28500000  -0.43620381
  0.28500000  -0.43620382
  0.28500000  -0.43620383
  0.28500000  -0.43620384
  0.28500000  -0.43620385
  0.28500000  -0.43620386
  0.28500000  -0.43620387
  0.28600000  -0.43695366
  0.28600000  -0.43695367
  0.28600000  -0.43695368
  0.28600000  -0.43695370
  0.28600000  -0.43695371
  0.28600000  -0.43695372
  0.28600000  -0.43695373
  0.28600000  -0.43695374
  0.28600000  -0.43695375
  0.28600000  -0.43695377
  0.28600000  -0.43695378
  0.28600000  -0.43695379
  0.28600000  -0.43695380
  0.28600000  -0.43695381
  0.28600000  -0.43695382
  0.28600000  -0.43695384
  0.28600000  -0.43695385
  0.28600000  -0.43695386
  0.28600000  -0.43695387
  0.28600000  -0.43695388
  0.28600000  -0.43695389
  0.28600000  -0.43695390
  0.28600000  -0.43695391
  0.28600000  -0.43695393
  0.28600000  -0.43695394
  0.28600000  -0.43695395
  0.28600000  -0.43695396
  0.28600000  -0.43695397
  0.28600000  -0.43695398
  0.28600000  -0.43695399
  0.28600000  -0.43695400
  0.28600000  -0.43695402
  0.28600000  -0.43695403
  0.28600000  -0.43695404
  0.28600000  -0.43695405
  0.28600000  -0.43695406
  0.28600000  -0.43695407
  0.28600000  -0.43695408
  0.28600000  -0.43695409
  0.28600000  -0.43695410
  0.28700000  -0.43770139
  0.28700000  -0.43770140
  0.28700000  -0.43770142
  0.28700000  -0.43770143
  0.28700000  -0.43770144
  0.28700000  -0.43770145
  0.28700000  -0.43770146
  0.28700000  -0.43770147
  0.28700000  -0.43770149
  0.28700000  -0.43770150
  0.28700000  -0.43770151
  0.28700000  -0.43770152
  0.28700000  -0.43770153
  0.28700000  -0.43770154
  0.28700000  -0.43770156
  0.28700000  -0.43770157
  0.28700000  -0.43770158
  0.28700000  -0.43770159
  0.28700000  -0.43770160
  0.28700000  -0.43770161
  0.28700000  -0.43770162
  0.28700000  -0.43770164
  0.28700000  -0.43770165
  0.28700000  -0.43770166
  0.28700000  -0.43770167
  0.28700000  -0.43770168
  0.28700000  -0.43770169
  0.28700000  -0.43770170
  0.28700000  -0.43770171
  0.28700000  -0.43770173
  0.28700000  -0.43770174
  0.28700000  -0.43770175
  0.28700000  -0.43770176
  0.28700000  -0.43770177
  0.28700000  -0.43770178
  0.28700000  -0.43770179
  0.28700000  -0.43770180
  0.28700000  -0.43770181
  0.28700000  -0.43770182
  0.28700000  -0.43770184
  0.28800000  -0.43844664
  0.28800000  -0.43844666
  0.28800000  -0.43844667
  0.28800000  -0.43844668
  0.28800000  -0.43844669
  0.28800000  -0.43844670
  0.28800000  -0.43844672
  0.28800000  -0.43844673
  0.28800000  -0.43844674
  0.28800000  -0.43844675
  0.28800000  -0.43844676
  0.28800000  -0.43844677
  0.28800000  -0.43844678
  0.28800000  -0.43844680
  0.28800000  -0.43844681
  0.28800000  -0.43844682
  0.28800000  -0.43844683
  0.28800000  -0.43844684
  0.28800000  -0.43844685
  0.28800000  -0.43844687
  0.28800000  -0.43844688
  0.28800000  -0.43844689
  0.28800000  -0.43844690
  0.28800000  -0.43844691
  0.28800000  -0.43844692
  0.28800000  -0.43844693
  0.28800000  -0.43844694
  0.28800000  -0.43844696
  0.28800000  -0.43844697
  0.28800000  -0.43844698
  0.28800000  -0.43844699
  0.28800000  -0.43844700
  0.28800000  -0.43844701
  0.28800000  -0.43844702
  0.28800000  -0.43844703
  0.28800000  -0.43844704
  0.28800000  -0.43844706
  0.28800000  -0.43844707
  0.28800000  -0.43844708
  0.28800000  -0.43844709
  0.28900000  -0.43918943
  0.28900000  -0.43918944
  0.28900000  -0.43918946
  0.28900000  -0.43918947
  0.28900000  -0.43918948
  0.28900000  -0.43918949
  0.28900000  -0.43918950
  0.28900000  -0.43918951
  0.28900000  -0.43918953
  0.28900000  -0.43918954
  0.28900000  -0.43918955
  0.28900000  -0.43918956
  0.28900000  -0.43918957
  0.28900000  -0.43918958
  0.28900000  -0.43918960
  0.28900000  -0.43918961
  0.28900000  -0.43918962
  0.28900000  -0.43918963
  0.28900000  -0.43918964
  0.28900000  -0.43918965
  0.28900000  -0.43918966
  0.28900000  -0.43918968
  0.28900000  -0.43918969
  0.28900000  -0.43918970
  0.28900000  -0.43918971
  0.28900000  -0.43918972
  0.28900000  -0.43918973
  0.28900000  -0.43918974
  0.28900000  -0.43918975
  0.28900000  -0.43918977
  0.28900000  -0.43918978
  0.28900000  -0.43918979
  0.28900000  -0.43918980
  0.28900000  -0.43918981
  0.28900000  -0.43918982
  0.28900000  -0.43918983
  0.28900000  -0.43918984
  0.28900000  -0.43918985
  0.28900000  -0.43918987
  0.28900000  -0.43918988
  0.29000000  -0.43992977
  0.29000000  -0.43992978
  0.29000000  -0.43992979
  0.29000000  -0.43992981
  0.29000000  -0.43992982
  0.29000000  -0.43992983
  0.29000000  -0.43992984
  0.29000000  -0.43992985
  0.29000000  -0.43992986
  0.29000000  -0.43992988
  0.29000000  -0.43992989
  0.29000000  -0.43992990
  0.29000000  -0.43992991
  0.29000000  -0.43992992
  0.29000000  -0.43992993
  0.29000000  -0.43992995
  0.29000000  -0.43992996
  0.29000000  -0.43992997
  0.29000000  -0.43992998
  0.29000000  -0.43992999
  0.29000000  -0.43993000
  0.29000000  -0.43993001
  0.29000000  -0.43993003
  0.29000000  -0.43993004
  0.29000000  -0.43993005
  0.29000000  -0.43993006
  0.29000000  -0.43993007
  0.29000000  -0.43993008
  0.29000000  -0.43993009
  0.29000000  -0.43993010
  0.29000000  -0.43993012
  0.29000000  -0.43993013
  0.29000000  -0.43993014
  0.29000000  -0.43993015
  0.29000000  -0.43993016
  0.29000000  -0.43993017
  0.29000000  -0.43993018
  0.29000000  -0.43993019
  0.29000000  -0.43993020
  0.29000000  -0.43993022
  0.29100000  -0.44066767
  0.29100000  -0.44066769
  0.29100000  -0.44066770
  0.29100000  -0.44066771
  0.29100000  -0.44066772
  0.29100000  -0.44066773
  0.29100000  -0.44066775
  0.29100000  -0.44066776
  0.29100000  -0.44066777
  0.29100000  -0.44066778
  0.29100000  -0.44066779
  0.29100000  -0.44066780
  0.29100000  -0.44066782
  0.29100000  -0.44066783
  0.29100000  -0.44066784
  0.29100000  -0.44066785
  0.29100000  -0.44066786
  0.29100000  -0.44066787
  0.29100000  -0.44066789
  0.29100000  -0.44066790
  0.29100000  -0.44066791
  0.29100000  -0.44066792
  0.29100000  -0.44066793
  0.29100000  -0.44066794
  0.29100000  -0.44066795
  0.29100000  -0.44066797
  0.29100000  -0.44066798
  0.29100000  -0.44066799
  0.29100000  -0.44066800
  0.29100000  -0.44066801
  0.29100000  -0.44066802
  0.29100000  -0.44066803
  0.29100000  -0.44066804
  0.29100000  -0.44066806
  0.29100000  -0.44066807
  0.29100000  -0.44066808
  0.29100000  -0.44066809
  0.29100000  -0.44066810
  0.29100000  -0.44066811
  0.29100000  -0.44066812
  0.29200000  -0.44140316
  0.29200000  -0.44140317
  0.29200000  -0.44140318
  0.29200000  -0.44140320
  0.29200000  -0.44140321
  0.29200000  -0.44140322
  0.29200000  -0.44140323
  0.29200000  -0.44140324
  0.29200000  -0.44140326
  0.29200000  -0.44140327
  0.29200000  -0.44140328
  0.29200000  -0.44140329
  0.29200000  -0.44140330
  0.29200000  -0.44140331
  0.29200000  -0.44140333
  0.29200000  -0.44140334
  0.29200000  -0.44140335
  0.29200000  -0.44140336
  0.29200000  -0.44140337
  0.29200000  -0.44140338
  0.29200000  -0.44140339
  0.29200000  -0.44140341
  0.29200000  -0.44140342
  0.29200000  -0.44140343
  0.29200000  -0.44140344
  0.29200000  -0.44140345
  0.29200000  -0.44140346
  0.29200000  -0.44140347
  0.29200000  -0.44140349
  0.29200000  -0.44140350
  0.29200000  -0.44140351
  0.29200000  -0.44140352
  0.29200000  -0.44140353
  0.29200000  -0.44140354
  0.29200000  -0.44140355
  0.29200000  -0.44140356
  0.29200000  -0.44140358
  0.29200000  -0.44140359
  0.29200000  -0.44140360
  0.29200000  -0.44140361
  0.29300000  -0.44213624
  0.29300000  -0.44213625
  0.29300000  -0.44213627
  0.29300000  -0.44213628
  0.29300000  -0.44213629
  0.29300000  -0.44213630
  0.29300000  -0.44213631
  0.29300000  -0.44213633
  0.29300000  -0.44213634
  0.29300000  -0.44213635
  0.29300000  -0.44213636
  0.29300000  -0.44213637
  0.29300000  -0.44213638
  0.29300000  -0.44213640
  0.29300000  -0.44213641
  0.29300000  -0.44213642
  0.29300000  -0.44213643
  0.29300000  -0.44213644
  0.29300000  -0.44213645
  0.29300000  -0.44213647
  0.29300000  -0.44213648
  0.29300000  -0.44213649
  0.29300000  -0.44213650
  0.29300000  -0.44213651
  0.29300000  -0.44213652
  0.29300000  -0.44213653
  0.29300000  -0.44213655
  0.29300000  -0.44213656
  0.29300000  -0.44213657
  0.29300000  -0.44213658
  0.29300000  -0.44213659
  0.29300000  -0.44213660
  0.29300000  -0.44213661
  0.29300000  -0.44213663
  0.29300000  -0.44213664
  0.29300000  -0.44213665
  0.29300000  -0.44213666
  0.29300000  -0.44213667
  0.29300000  -0.44213668
  0.29300000  -0.44213669
  0.29400000  -0.44286694
  0.29400000  -0.44286695
  0.29400000  -0.44286696
  0.29400000  -0.44286697
  0.29400000  -0.44286698
  0.29400000  -0.44286700
  0.29400000  -0.44286701
  0.29400000  -0.44286702
  0.29400000  -0.44286703
  0.29400000  -0.44286704
  0.29400000  -0.44286705
  0.29400000  -0.44286707
  0.29400000  -0.44286708
  0.29400000  -0.44286709
  0.29400000  -0.44286710
  0.29400000  -0.44286711
  0.29400000  -0.44286713
  0.29400000  -0.44286714
  0.29400000  -0.44286715
  0.29400000  -0.44286716
  0.29400000  -0.44286717
  0.29400000  -0.44286718
  0.29400000  -0.44286719
  0.29400000  -0.44286721
  0.29400000  -0.44286722
  0.29400000  -0.44286723
  0.29400000  -0.44286724
  0.29400000  -0.44286725
  0.29400000  -0.44286726
  0.29400000  -0.44286727
  0.29400000  -0.44286729
  0.29400000  -0.44286730
  0.29400000  -0.44286731
  0.29400000  -0.44286732
  0.29400000  -0.44286733
  0.29400000  -0.44286734
  0.29400000  -0.44286735
  0.29400000  -0.44286736
  0.29400000  -0.44286738
  0.29400000  -0.44286739
  0.29500000  -0.44359525
  0.29500000  -0.44359527
  0.29500000  -0.44359528
  0.29500000  -0.44359529
  0.29500000  -0.44359530
  0.29500000  -0.44359531
  0.29500000  -0.44359533
  0.29500000  -0.44359534
  0.29500000  -0.44359535
  0.29500000  -0.44359536
  0.29500000  -0.44359537
  0.29500000  -0.44359539
  0.29500000  -0.44359540
  0.29500000  -0.44359541
  0.29500000  -0.44359542
  0.29500000  -0.44359543
  0.29500000  -0.44359544
  0.29500000  -0.44359546
  0.29500000  -0.44359547
  0.29500000  -0.44359548
  0.29500000  -0.44359549
  0.29500000  -0.44359550
  0.29500000  -0.44359551
  0.29500000  -0.44359553
  0.29500000  -0.44359554
  0.29500000  -0.44359555
  0.29500000  -0.44359556
  0.29500000  -0.44359557
  0.29500000  -0.44359558
  0.29500000  -0.44359559
  0.29500000  -0.44359561
  0.29500000  -0.44359562
  0.29500000  -0.44359563
  0.29500000  -0.44359564
  0.29500000  -0.44359565
  0.29500000  -0.44359566
  0.29500000  -0.44359567
  0.29500000  -0.44359568
  0.29500000  -0.44359570
  0.29500000  -0.44359571
  0.29600000  -0.44432121
  0.29600000  -0.44432123
  0.29600000  -0.44432124
  0.29600000  -0.44432125
  0.29600000  -0.44432126
  0.29600000  -0.44432127
  0.29600000  -0.44432129
  0.29600000  -0.44432130
  0.29600000  -0.44432131
  0.29600000  -0.44432132
  0.29600000  -0.44432133
  0.29600000  -0.44432135
  0.29600000  -0.44432136
  0.29600000  -0.44432137
  0.29600000  -0.44432138
  0.29600000  -0.44432139
  0.29600000  -0.44432140
  0.29600000  -0.44432142
  0.29600000  -0.44432143
  0.29600000  -0.44432144
  0.29600000  -0.44432145
  0.29600000  -0.44432146
  0.29600000  -0.44432147
  0.29600000  -0.44432149
  0.29600000  -0.44432150
  0.29600000  -0.44432151
  0.29600000  -0.44432152
  0.29600000  -0.44432153
  0.29600000  -0.44432154
  0.29600000  -0.44432155
  0.29600000  -0.44432157
  0.29600000  -0.44432158
  0.29600000  -0.44432159
  0.29600000  -0.44432160
  0.29600000  -0.44432161
  0.29600000  -0.44432162
  0.29600000  -0.44432163
  0.29600000  -0.44432164
  0.29600000  -0.44432166
  0.29600000  -0.44432167
  0.29700000  -0.44504483
  0.29700000  -0.44504484
  0.29700000  -0.44504485
  0.29700000  -0.44504486
  0.29700000  -0.44504488
  0.29700000  -0.44504489
  0.29700000  -0.44504490
  0.29700000  -0.44504491
  0.29700000  -0.44504492
  0.29700000  -0.44504494
  0.29700000  -0.44504495
  0.29700000  -0.44504496
  0.29700000  -0.44504497
  0.29700000  -0.44504498
  0.29700000  -0.44504499
  0.29700000  -0.44504501
  0.29700000  -0.44504502
  0.29700000  -0.44504503
  0.29700000  -0.44504504
  0.29700000  -0.44504505
  0.29700000  -0.44504506
  0.29700000  -0.44504508
  0.29700000  -0.44504509
  0.29700000  -0.44504510
  0.29700000  -0.44504511
  0.29700000  -0.44504512
  0.29700000  -0.44504513
  0.29700000  -0.44504515
  0.29700000  -0.44504516
  0.29700000  -0.44504517
  0.29700000  -0.44504518
  0.29700000  -0.44504519
  0.29700000  -0.44504520
  0.29700000  -0.44504521
  0.29700000  -0.44504523
  0.29700000  -0.44504524
  0.29700000  -0.44504525
  0.29700000  -0.44504526
  0.29700000  -0.44504527
  0.29700000  -0.44504528
  0.29800000  -0.44576611
  0.29800000  -0.44576612
  0.29800000  -0.44576613
  0.29800000  -0.44576615
  0.29800000  -0.44576616
  0.29800000  -0.44576617
  0.29800000  -0.44576618
  0.29800000  -0.44576619
  0.29800000  -0.44576621
  0.29800000  -0.44576622
  0.29800000  -0.44576623
  0.29800000  -0.44576624
  0.29800000  -0.44576625
  0.29800000  -0.44576627
  0.29800000  -0.44576628
  0.29800000  -0.44576629
  0.29800000  -0.44576630
  0.29800000  -0.44576631
  0.29800000  -0.44576632
  0.29800000  -0.44576634
  0.29800000  -0.44576635
  0.29800000  -0.44576636
  0.29800000  -0.44576637
  0.29800000  -0.44576638
  0.29800000  -0.44576639
  0.29800000  -0.44576641
  0.29800000  -0.44576642
  0.29800000  -0.44576643
  0.29800000  -0.44576644
  0.29800000  -0.44576645
  0.29800000  -0.44576646
  0.29800000  -0.44576647
  0.29800000  -0.44576649
  0.29800000  -0.44576650
  0.29800000  -0.44576651
  0.29800000  -0.44576652
  0.29800000  -0.44576653
  0.29800000  -0.44576654
  0.29800000  -0.44576655
  0.29800000  -0.44576656
  0.29900000  -0.44648508
  0.29900000  -0.44648509
  0.29900000  -0.44648510
  0.29900000  -0.44648511
  0.29900000  -0.44648512
  0.29900000  -0.44648514
  0.29900000  -0.44648515
  0.29900000  -0.44648516
  0.29900000  -0.44648517
  0.29900000  -0.44648518
  0.29900000  -0.44648520
  0.29900000  -0.44648521
  0.29900000  -0.44648522
  0.29900000  -0.44648523
  0.29900000  -0.44648524
  0.29900000  -0.44648525
  0.29900000  -0.44648527
  0.29900000  -0.44648528
  0.29900000  -0.44648529
  0.29900000  -0.44648530
  0.29900000  -0.44648531
  0.29900000  -0.44648533
  0.29900000  -0.44648534
  0.29900000  -0.44648535
  0.29900000  -0.44648536
  0.29900000  -0.44648537
  0.29900000  -0.44648538
  0.29900000  -0.44648539
  0.29900000  -0.44648541
  0.29900000  -0.44648542
  0.29900000  -0.44648543
  0.29900000  -0.44648544
  0.29900000  -0.44648545
  0.29900000  -0.44648546
  0.29900000  -0.44648547
  0.29900000  -0.44648549
  0.29900000  -0.44648550
  0.29900000  -0.44648551
  0.29900000  -0.44648552
  0.29900000  -0.44648553
  0.30000000  -0.44720174
  0.30000000  -0.44720175
  0.30000000  -0.44720176
  0.30000000  -0.44720177
  0.30000000  -0.44720179
  0.30000000  -0.44720180
  0.30000000  -0.44720181
  0.30000000  -0.44720182
  0.30000000  -0.44720183
  0.30000000  -0.44720185
  0.30000000  -0.44720186
  0.30000000  -0.44720187
  0.30000000  -0.44720188
  0.30000000  -0.44720189
  0.30000000  -0.44720191
  0.30000000  -0.44720192
  0.30000000  -0.44720193
  0.30000000  -0.44720194
  0.30000000  -0.44720195
  0.30000000  -0.44720196
  0.30000000  -0.44720198
  0.30000000  -0.44720199
  0.30000000  -0.44720200
  0.30000000  -0.44720201
  0.30000000  -0.44720202
  0.30000000  -0.44720203
  0.30000000  -0.44720205
  0.30000000  -0.44720206
  0.30000000  -0.44720207
  0.30000000  -0.44720208
  0.30000000  -0.44720209
  0.30000000  -0.44720210
  0.30000000  -0.44720211
  0.30000000  -0.44720213
  0.30000000  -0.44720214
  0.30000000  -0.44720215
  0.30000000  -0.44720216
  0.30000000  -0.44720217
  0.30000000  -0.44720218
  0.30000000  -0.44720219
  0.30100000  -0.44791611
  0.30100000  -0.44791612
  0.30100000  -0.44791613
  0.30100000  -0.44791615
  0.30100000  -0.44791616
  0.30100000  -0.44791617
  0.30100000  -0.44791618
  0.30100000  -0.44791619
  0.30100000  -0.44791621
  0.30100000  -0.44791622
  0.30100000  -0.44791623
  0.30100000  -0.44791624
  0.30100000  -0.44791625
  0.30100000  -0.44791627
  0.30100000  -0.44791628
  0.30100000  -0.44791629
  0.30100000  -0.44791630
  0.30100000  -0.44791631
  0.30100000  -0.44791633
  0.30100000  -0.44791634
  0.30100000  -0.44791635
  0.30100000  -0.44791636
  0.30100000  -0.44791637
  0.30100000  -0.44791638
  0.30100000  -0.44791640
  0.30100000  -0.44791641
  0.30100000  -0.44791642
  0.30100000  -0.44791643
  0.30100000  -0.44791644
  0.30100000  -0.44791645
  0.30100000  -0.44791646
  0.30100000  -0.44791648
  0.30100000  -0.44791649
  0.30100000  -0.44791650
  0.30100000  -0.44791651
  0.30100000  -0.44791652
  0.30100000  -0.44791653
  0.30100000  -0.44791654
  0.30100000  -0.44791656
  0.30100000  -0.44791657
  0.30200000  -0.44862821
  0.30200000  -0.44862822
  0.30200000  -0.44862823
  0.30200000  -0.44862824
  0.30200000  -0.44862825
  0.30200000  -0.44862827
  0.30200000  -0.44862828
  0.30200000  -0.44862829
  0.30200000  -0.44862830
  0.30200000  -0.44862832
  0.30200000  -0.44862833
  0.30200000  -0.44862834
  0.30200000  -0.44862835
  0.30200000  -0.44862836
  0.30200000  -0.44862837
  0.30200000  -0.44862839
  0.30200000  -0.44862840
  0.30200000  -0.44862841
  0.30200000  -0.44862842
  0.30200000  -0.44862843
  0.30200000  -0.44862845
  0.30200000  -0.44862846
  0.30200000  -0.44862847
  0.30200000  -0.44862848
  0.30200000  -0.44862849
  0.30200000  -0.44862850
  0.30200000  -0.44862852
  0.30200000  -0.44862853
  0.30200000  -0.44862854
  0.30200000  -0.44862855
  0.30200000  -0.44862856
  0.30200000  -0.44862857
  0.30200000  -0.44862859
  0.30200000  -0.44862860
  0.30200000  -0.44862861
  0.30200000  -0.44862862
  0.30200000  -0.44862863
  0.30200000  -0.44862864
  0.30200000  -0.44862865
  0.30200000  -0.44862866
  0.30300000  -0.44933804
  0.30300000  -0.44933805
  0.30300000  -0.44933806
  0.30300000  -0.44933808
  0.30300000  -0.44933809
  0.30300000  -0.44933810
  0.30300000  -0.44933811
  0.30300000  -0.44933813
  0.30300000  -0.44933814
  0.30300000  -0.44933815
  0.30300000  -0.44933816
  0.30300000  -0.44933817
  0.30300000  -0.44933819
  0.30300000  -0.44933820
  0.30300000  -0.44933821
  0.30300000  -0.44933822
  0.30300000  -0.44933823
  0.30300000  -0.44933825
  0.30300000  -0.44933826
  0.30300000  -0.44933827
  0.30300000  -0.44933828
  0.30300000  -0.44933829
  0.30300000  -0.44933830
  0.30300000  -0.44933832
  0.30300000  -0.44933833
  0.30300000  -0.44933834
  0.30300000  -0.44933835
  0.30300000  -0.44933836
  0.30300000  -0.44933837
  0.30300000  -0.44933839
  0.30300000  -0.44933840
  0.30300000  -0.44933841
  0.30300000  -0.44933842
  0.30300000  -0.44933843
  0.30300000  -0.44933844
  0.30300000  -0.44933845
  0.30300000  -0.44933847
  0.30300000  -0.44933848
  0.30300000  -0.44933849
  0.30300000  -0.44933850
  0.30400000  -0.45004563
  0.30400000  -0.45004564
  0.30400000  -0.45004565
  0.30400000  -0.45004566
  0.30400000  -0.45004567
  0.30400000  -0.45004569
  0.30400000  -0.45004570
  0.30400000  -0.45004571
  0.30400000  -0.45004572
  0.30400000  -0.45004574
  0.30400000  -0.45004575
  0.30400000  -0.45004576
  0.30400000  -0.45004577
  0.30400000  -0.45004578
  0.30400000  -0.45004580
  0.30400000  -0.45004581
  0.30400000  -0.45004582
  0.30400000  -0.45004583
  0.30400000  -0.45004584
  0.30400000  -0.45004585
  0.30400000  -0.45004587
  0.30400000  -0.45004588
  0.30400000  -0.45004589
  0.30400000  -0.45004590
  0.30400000  -0.45004591
  0.30400000  -0.45004593
  0.30400000  -0.45004594
  0.30400000  -0.45004595
  0.30400000  -0.45004596
  0.30400000  -0.45004597
  0.30400000  -0.45004598
  0.30400000  -0.45004600
  0.30400000  -0.45004601
  0.30400000  -0.45004602
  0.30400000  -0.45004603
  0.30400000  -0.45004604
  0.30400000  -0.45004605
  0.30400000  -0.45004606
  0.30400000  -0.45004608
  0.30400000  -0.45004609
  0.30500000  -0.45075098
  0.30500000  -0.45075099
  0.30500000  -0.45075100
  0.30500000  -0.45075101
  0.30500000  -0.45075102
  0.30500000  -0.45075104
  0.30500000  -0.45075105
  0.30500000  -0.45075106
  0.30500000  -0.45075107
  0.30500000  -0.45075109
  0.30500000  -0.45075110
  0.30500000  -0.45075111
  0.30500000  -0.45075112
  0.30500000  -0.45075113
  0.30500000  -0.45075115
  0.30500000  -0.45075116
  0.30500000  -0.45075117
  0.30500000  -0.45075118
  0.30500000  -0.45075119
  0.30500000  -0.45075121
  0.30500000  -0.45075122
  0.30500000  -0.45075123
  0.30500000  -0.45075124
  0.30500000  -0.45075125
  0.30500000  -0.45075126
  0.30500000  -0.45075128
  0.30500000  -0.45075129
  0.30500000  -0.45075130
  0.30500000  -0.45075131
  0.30500000  -0.45075132
  0.30500000  -0.45075133
  0.30500000  -0.45075135
  0.30500000  -0.45075136
  0.30500000  -0.45075137
  0.30500000  -0.45075138
  0.30500000  -0.45075139
  0.30500000  -0.45075140
  0.30500000  -0.45075141
  0.30500000  -0.45075143
  0.30500000  -0.45075144
  0.30600000  -0.45145410
  0.30600000  -0.45145412
  0.30600000  -0.45145413
  0.30600000  -0.45145414
  0.30600000  -0.45145415
  0.30600000  -0.45145416
  0.30600000  -0.45145418
  0.30600000  -0.45145419
  0.30600000  -0.45145420
  0.30600000  -0.45145421
  0.30600000  -0.45145423
  0.30600000  -0.45145424
  0.30600000  -0.45145425
  0.30600000  -0.45145426
  0.30600000  -0.45145427
  0.30600000  -0.45145429
  0.30600000  -0.45145430
  0.30600000  -0.45145431
  0.30600000  -0.45145432
  0.30600000  -0.45145433
  0.30600000  -0.45145435
  0.30600000  -0.45145436
  0.30600000  -0.45145437
  0.30600000  -0.45145438
  0.30600000  -0.45145439
  0.30600000  -0.45145440
  0.30600000  -0.45145442
  0.30600000  -0.45145443
  0.30600000  -0.45145444
  0.30600000  -0.45145445
  0.30600000  -0.45145446
  0.30600000  -0.45145447
  0.30600000  -0.45145449
  0.30600000  -0.45145450
  0.30600000  -0.45145451
  0.30600000  -0.45145452
  0.30600000  -0.45145453
  0.30600000  -0.45145454
  0.30600000  -0.45145455
  0.30600000  -0.45145457
  0.30700000  -0.45215502
  0.30700000  -0.45215503
  0.30700000  -0.45215505
  0.30700000  -0.45215506
  0.30700000  -0.45215507
  0.30700000  -0.45215508
  0.30700000  -0.45215510
  0.30700000  -0.45215511
  0.30700000  -0.45215512
  0.30700000  -0.45215513
  0.30700000  -0.45215514
  0.30700000  -0.45215516
  0.30700000  -0.45215517
  0.30700000  -0.45215518
  0.30700000  -0.45215519
  0.30700000  -0.45215520
  0.30700000  -0.45215522
  0.30700000  -0.45215523
  0.30700000  -0.45215524
  0.30700000  -0.45215525
  0.30700000  -0.45215526
  0.30700000  -0.45215528
  0.30700000  -0.45215529
  0.30700000  -0.45215530
  0.30700000  -0.45215531
  0.30700000  -0.45215532
  0.30700000  -0.45215533
  0.30700000  -0.45215535
  0.30700000  -0.45215536
  0.30700000  -0.45215537
  0.30700000  -0.45215538
  0.30700000  -0.45215539
  0.30700000  -0.45215540
  0.30700000  -0.45215542
  0.30700000  -0.45215543
  0.30700000  -0.45215544
  0.30700000  -0.45215545
  0.30700000  -0.45215546
  0.30700000  -0.45215547
  0.30700000  -0.45215549
  0.30800000  -0.45285374
  0.30800000  -0.45285376
  0.30800000  -0.45285377
  0.30800000  -0.45285378
  0.30800000  -0.45285379
  0.30800000  -0.45285380
  0.30800000  -0.45285382
  0.30800000  -0.45285383
  0.30800000  -0.45285384
  0.30800000  -0.45285385
  0.30800000  -0.45285387
  0.30800000  -0.45285388
  0.30800000  -0.45285389
  0.30800000  -0.45285390
  0.30800000  -0.45285391
  0.30800000  -0.45285393
  0.30800000  -0.45285394
  0.30800000  -0.45285395
  0.30800000  -0.45285396
  0.30800000  -0.45285397
  0.30800000  -0.45285399
  0.30800000  -0.45285400
  0.30800000  -0.45285401
  0.30800000  -0.45285402
  0.30800000  -0.45285403
  0.30800000  -0.45285405
  0.30800000  -0.45285406
  0.30800000  -0.45285407
  0.30800000  -0.45285408
  0.30800000  -0.45285409
  0.30800000  -0.45285410
  0.30800000  -0.45285412
  0.30800000  -0.45285413
  0.30800000  -0.45285414
  0.30800000  -0.45285415
  0.30800000  -0.45285416
  0.30800000  -0.45285417
  0.30800000  -0.45285418
  0.30800000  -0.45285420
  0.30800000  -0.45285421
  0.30900000  -0.45355028
  0.30900000  -0.45355029
  0.30900000  -0.45355031
  0.30900000  -0.45355032
  0.30900000  -0.45355033
  0.30900000  -0.45355034
  0.30900000  -0.45355036
  0.30900000  -0.45355037
  0.30900000  -0.45355038
  0.30900000  -0.45355039
  0.30900000  -0.45355040
  0.30900000  -0.45355042
  0.30900000  -0.45355043
  0.30900000  -0.45355044
  0.30900000  -0.45355045
  0.30900000  -0.45355046
  0.30900000  -0.45355048
  0.30900000  -0.45355049
  0.30900000  -0.45355050
  0.30900000  -0.45355051
  0.30900000  -0.45355052
  0.30900000  -0.45355054
  0.30900000  -0.45355055
  0.30900000  -0.45355056
  0.30900000  -0.45355057
  0.30900000  -0.45355058
  0.30900000  -0.45355060
  0.30900000  -0.45355061
  0.30900000  -0.45355062
  0.30900000  -0.45355063
  0.30900000  -0.45355064
  0.30900000  -0.45355065
  0.30900000  -0.45355067
  0.30900000  -0.45355068
  0.30900000  -0.45355069
  0.30900000  -0.45355070
  0.30900000  -0.45355071
  0.30900000  -0.45355072
  0.30900000  -0.45355074
  0.30900000  -0.45355075
  0.31000000  -0.45424465
  0.31000000  -0.45424466
  0.31000000  -0.45424467
  0.31000000  -0.45424469
  0.31000000  -0.45424470
  0.31000000  -0.45424471
  0.31000000  -0.45424472
  0.31000000  -0.45424473
  0.31000000  -0.45424475
  0.31000000  -0.45424476
  0.31000000  -0.45424477
  0.31000000  -0.45424478
  0.31000000  -0.45424480
  0.31000000  -0.45424481
  0.31000000  -0.45424482
  0.31000000  -0.45424483
  0.31000000  -0.45424484
  0.31000000  -0.45424486
  0.31000000  -0.45424487
  0.31000000  -0.45424488
  0.31000000  -0.45424489
  0.31000000  -0.45424490
  0.31000000  -0.45424492
  0.31000000  -0.45424493
  0.31000000  -0.45424494
  0.31000000  -0.45424495
  0.31000000  -0.45424496
  0.31000000  -0.45424498
  0.31000000  -0.45424499
  0.31000000  -0.45424500
  0.31000000  -0.45424501
  0.31000000  -0.45424502
  0.31000000  -0.45424503
  0.31000000  -0.45424505
  0.31000000  -0.45424506
  0.31000000  -0.45424507
  0.31000000  -0.45424508
  0.31000000  -0.45424509
  0.31000000  -0.45424510
  0.31000000  -0.45424511
  0.31100000  -0.45493686
  0.31100000  -0.45493687
  0.31100000  -0.45493688
  0.31100000  -0.45493689
  0.31100000  -0.45493691
  0.31100000  -0.45493692
  0.31100000  -0.45493693
  0.31100000  -0.45493694
  0.31100000  -0.45493696
  0.31100000  -0.45493697
  0.31100000  -0.45493698
  0.31100000  -0.45493699
  0.31100000  -0.45493700
  0.31100000  -0.45493702
  0.31100000  -0.45493703
  0.31100000  -0.45493704
  0.31100000  -0.45493705
  0.31100000  -0.45493707
  0.31100000  -0.45493708
  0.31100000  -0.45493709
  0.31100000  -0.45493710
  0.31100000  -0.45493711
  0.31100000  -0.45493713
  0.31100000  -0.45493714
  0.31100000  -0.45493715
  0.31100000  -0.45493716
  0.31100000  -0.45493717
  0.31100000  -0.45493718
  0.31100000  -0.45493720
  0.31100000  -0.45493721
  0.31100000  -0.45493722
  0.31100000  -0.45493723
  0.31100000  -0.45493724
  0.31100000  -0.45493725
  0.31100000  -0.45493727
  0.31100000  -0.45493728
  0.31100000  -0.45493729
  0.31100000  -0.45493730
  0.31100000  -0.45493731
  0.31100000  -0.45493732
  0.31200000  -0.45562692
  0.31200000  -0.45562693
  0.31200000  -0.45562694
  0.31200000  -0.45562696
  0.31200000  -0.45562697
  0.31200000  -0.45562698
  0.31200000  -0.45562699
  0.31200000  -0.45562701
  0.31200000  -0.45562702
  0.31200000  -0.45562703
  0.31200000  -0.45562704
  0.31200000  -0.45562706
  0.31200000  -0.45562707
  0.31200000  -0.45562708
  0.31200000  -0.45562709
  0.31200000  -0.45562710
  0.31200000  -0.45562712
  0.31200000  -0.45562713
  0.31200000  -0.45562714
  0.31200000  -0.45562715
  0.31200000  -0.45562716
  0.31200000  -0.45562718
  0.31200000  -0.45562719
  0.31200000  -0.45562720
  0.31200000  -0.45562721
  0.31200000  -0.45562722
  0.31200000  -0.45562724
  0.31200000  -0.45562725
  0.31200000  -0.45562726
  0.31200000  -0.45562727
  0.31200000  -0.45562728
  0.31200000  -0.45562729
  0.31200000  -0.45562731
  0.31200000  -0.45562732
  0.31200000  -0.45562733
  0.31200000  -0.45562734
  0.31200000  -0.45562735
  0.31200000  -0.45562736
  0.31200000  -0.45562738
  0.31200000  -0.45562739
  0.31300000  -0.45631485
  0.31300000  -0.45631486
  0.31300000  -0.45631487
  0.31300000  -0.45631489
  0.31300000  -0.45631490
  0.31300000  -0.45631491
  0.31300000  -0.45631492
  0.31300000  -0.45631494
  0.31300000  -0.45631495
  0.31300000  -0.45631496
  0.31300000  -0.45631497
  0.31300000  -0.45631498
  0.31300000  -0.45631500
  0.31300000  -0.45631501
  0.31300000  -0.45631502
  0.31300000  -0.45631503
  0.31300000  -0.45631505
  0.31300000  -0.45631506
  0.31300000  -0.45631507
  0.31300000  -0.45631508
  0.31300000  -0.45631509
  0.31300000  -0.45631511
  0.31300000  -0.45631512
  0.31300000  -0.45631513
  0.31300000  -0.45631514
  0.31300000  -0.45631515
  0.31300000  -0.45631517
  0.31300000  -0.45631518
  0.31300000  -0.45631519
  0.31300000  -0.45631520
  0.31300000  -0.45631521
  0.31300000  -0.45631522
  0.31300000  -0.45631524
  0.31300000  -0.45631525
  0.31300000  -0.45631526
  0.31300000  -0.45631527
  0.31300000  -0.45631528
  0.31300000  -0.45631529
  0.31300000  -0.45631531
  0.31300000  -0.45631532
  0.31400000  -0.45700066
  0.31400000  -0.45700067
  0.31400000  -0.45700068
  0.31400000  -0.45700069
  0.31400000  -0.45700071
  0.31400000  -0.45700072
  0.31400000  -0.45700073
  0.31400000  -0.45700074
  0.31400000  -0.45700076
  0.31400000  -0.45700077
  0.31400000  -0.45700078
  0.31400000  -0.45700079
  0.31400000  -0.45700080
  0.31400000  -0.45700082
  0.31400000  -0.45700083
  0.31400000  -0.45700084
  0.31400000  -0.45700085
  0.31400000  -0.45700087
  0.31400000  -0.45700088
  0.31400000  -0.45700089
  0.31400000  -0.45700090
  0.31400000  -0.45700091
  0.31400000  -0.45700093
  0.31400000  -0.45700094
  0.31400000  -0.45700095
  0.31400000  -0.45700096
  0.31400000  -0.45700097
  0.31400000  -0.45700099
  0.31400000  -0.45700100
  0.31400000  -0.45700101
  0.31400000  -0.45700102
  0.31400000  -0.45700103
  0.31400000  -0.45700104
  0.31400000  -0.45700106
  0.31400000  -0.45700107
  0.31400000  -0.45700108
  0.31400000  -0.45700109
  0.31400000  -0.45700110
  0.31400000  -0.45700111
  0.31400000  -0.45700113
  0.31500000  -0.45768435
  0.31500000  -0.45768437
  0.31500000  -0.45768438
  0.31500000  -0.45768439
  0.31500000  -0.45768440
  0.31500000  -0.45768442
  0.31500000  -0.45768443
  0.31500000  -0.45768444
  0.31500000  -0.45768445
  0.31500000  -0.45768447
  0.31500000  -0.45768448
  0.31500000  -0.45768449
  0.31500000  -0.45768450
  0.31500000  -0.45768452
  0.31500000  -0.45768453
  0.31500000  -0.45768454
  0.31500000  -0.45768455
  0.31500000  -0.45768456
  0.31500000  -0.45768458
  0.31500000  -0.45768459
  0.31500000  -0.45768460
  0.31500000  -0.45768461
  0.31500000  -0.45768462
  0.31500000  -0.45768464
  0.31500000  -0.45768465
  0.31500000  -0.45768466
  0.31500000  -0.45768467
  0.31500000  -0.45768468
  0.31500000  -0.45768470
  0.31500000  -0.45768471
  0.31500000  -0.45768472
  0.31500000  -0.45768473
  0.31500000  -0.45768474
  0.31500000  -0.45768476
  0.31500000  -0.45768477
  0.31500000  -0.45768478
  0.31500000  -0.45768479
  0.31500000  -0.45768480
  0.31500000  -0.45768481
  0.31500000  -0.45768483
  0.31600000  -0.45836596
  0.31600000  -0.45836597
  0.31600000  -0.45836598
  0.31600000  -0.45836599
  0.31600000  -0.45836601
  0.31600000  -0.45836602
  0.31600000  -0.45836603
  0.31600000  -0.45836604
  0.31600000  -0.45836606
  0.31600000  -0.45836607
  0.31600000  -0.45836608
  0.31600000  -0.45836609
  0.31600000  -0.45836610
  0.31600000  -0.45836612
  0.31600000  -0.45836613
  0.31600000  -0.45836614
  0.31600000  -0.45836615
  0.31600000  -0.45836617
  0.31600000  -0.45836618
  0.31600000  -0.45836619
  0.31600000  -0.45836620
  0.31600000  -0.45836621
  0.31600000  -0.45836623
  0.31600000  -0.45836624
  0.31600000  -0.45836625
  0.31600000  -0.45836626
  0.31600000  -0.45836627
  0.31600000  -0.45836629
  0.31600000  -0.45836630
  0.31600000  -0.45836631
  0.31600000  -0.45836632
  0.31600000  -0.45836633
  0.31600000  -0.45836635
  0.31600000  -0.45836636
  0.31600000  -0.45836637
  0.31600000  -0.45836638
  0.31600000  -0.45836639
  0.31600000  -0.45836640
  0.31600000  -0.45836642
  0.31600000  -0.45836643
  0.31700000  -0.45904547
  0.31700000  -0.45904548
  0.31700000  -0.45904550
  0.31700000  -0.45904551
  0.31700000  -0.45904552
  0.31700000  -0.45904553
  0.31700000  -0.45904555
  0.31700000  -0.45904556
  0.31700000  -0.45904557
  0.31700000  -0.45904558
  0.31700000  -0.45904560
  0.31700000  -0.45904561
  0.31700000  -0.45904562
  0.31700000  -0.45904563
  0.31700000  -0.45904564
  0.31700000  -0.45904566
  0.31700000  -0.45904567
  0.31700000  -0.45904568
  0.31700000  -0.45904569
  0.31700000  -0.45904571
  0.31700000  -0.45904572
  0.31700000  -0.45904573
  0.31700000  -0.45904574
  0.31700000  -0.45904575
  0.31700000  -0.45904577
  0.31700000  -0.45904578
  0.31700000  -0.45904579
  0.31700000  -0.45904580
  0.31700000  -0.45904581
  0.31700000  -0.45904583
  0.31700000  -0.45904584
  0.31700000  -0.45904585
  0.31700000  -0.45904586
  0.31700000  -0.45904587
  0.31700000  -0.45904589
  0.31700000  -0.45904590
  0.31700000  -0.45904591
  0.31700000  -0.45904592
  0.31700000  -0.45904593
  0.31700000  -0.45904594
  0.31800000  -0.45972291
  0.31800000  -0.45972293
  0.31800000  -0.45972294
  0.31800000  -0.45972295
  0.31800000  -0.45972296
  0.31800000  -0.45972298
  0.31800000  -0.45972299
  0.31800000  -0.45972300
  0.31800000  -0.45972301
  0.31800000  -0.45972303
  0.31800000  -0.45972304
  0.31800000  -0.45972305
  0.31800000  -0.45972306
  0.31800000  -0.45972307
  0.31800000  -0.45972309
  0.31800000  -0.45972310
  0.31800000  -0.45972311
  0.31800000  -0.45972312
  0.31800000  -0.45972314
  0.31800000  -0.45972315
  0.31800000  -0.45972316
  0.31800000  -0.45972317
  0.31800000  -0.45972318
  0.31800000  -0.45972320
  0.31800000  -0.45972321
  0.31800000  -0.45972322
  0.31800000  -0.45972323
  0.31800000  -0.45972324
  0.31800000  -0.45972326
  0.31800000  -0.45972327
  0.31800000  -0.45972328
  0.31800000  -0.45972329
  0.31800000  -0.45972330
  0.31800000  -0.45972332
  0.31800000  -0.45972333
  0.31800000  -0.45972334
  0.31800000  -0.45972335
  0.31800000  -0.45972336
  0.31800000  -0.45972337
  0.31800000  -0.45972339
  0.31900000  -0.46039829
  0.31900000  -0.46039831
  0.31900000  -0.46039832
  0.31900000  -0.46039833
  0.31900000  -0.46039834
  0.31900000  -0.46039836
  0.31900000  -0.46039837
  0.31900000  -0.46039838
  0.31900000  -0.46039839
  0.31900000  -0.46039841
  0.31900000  -0.46039842
  0.31900000  -0.46039843
  0.31900000  -0.46039844
  0.31900000  -0.46039845
  0.31900000  -0.46039847
  0.31900000  -0.46039848
  0.31900000  -0.46039849
  0.31900000  -0.46039850
  0.31900000  -0.46039852
  0.31900000  -0.46039853
  0.31900000  -0.46039854
  0.31900000  -0.46039855
  0.31900000  -0.46039856
  0.31900000  -0.46039858
  0.31900000  -0.46039859
  0.31900000  -0.46039860
  0.31900000  -0.46039861
  0.31900000  -0.46039863
  0.31900000  -0.46039864
  0.31900000  -0.46039865
  0.31900000  -0.46039866
  0.31900000  -0.46039867
  0.31900000  -0.46039868
  0.31900000  -0.46039870
  0.31900000  -0.46039871
  0.31900000  -0.46039872
  0.31900000  -0.46039873
  0.31900000  -0.46039874
  0.31900000  -0.46039876
  0.31900000  -0.46039877
  0.32000000  -0.46107162
  0.32000000  -0.46107163
  0.32000000  -0.46107165
  0.32000000  -0.46107166
  0.32000000  -0.46107167
  0.32000000  -0.46107169
  0.32000000  -0.46107170
  0.32000000  -0.46107171
  0.32000000  -0.46107172
  0.32000000  -0.46107174
  0.32000000  -0.46107175
  0.32000000  -0.46107176
  0.32000000  -0.46107177
  0.32000000  -0.46107178
  0.32000000  -0.46107180
  0.32000000  -0.46107181
  0.32000000  -0.46107182
  0.32000000  -0.46107183
  0.32000000  -0.46107185
  0.32000000  -0.46107186
  0.32000000  -0.46107187
  0.32000000  -0.46107188
  0.32000000  -0.46107189
  0.32000000  -0.46107191
  0.32000000  -0.46107192
  0.32000000  -0.46107193
  0.32000000  -0.46107194
  0.32000000  -0.46107196
  0.32000000  -0.46107197
  0.32000000  -0.46107198
  0.32000000  -0.46107199
  0.32000000  -0.46107200
  0.32000000  -0.46107201
  0.32000000  -0.46107203
  0.32000000  -0.46107204
  0.32000000  -0.46107205
  0.32000000  -0.46107206
  0.32000000  -0.46107207
  0.32000000  -0.46107209
  0.32000000  -0.46107210
  0.32100000  -0.46174291
  0.32100000  -0.46174293
  0.32100000  -0.46174294
  0.32100000  -0.46174295
  0.32100000  -0.46174296
  0.32100000  -0.46174298
  0.32100000  -0.46174299
  0.32100000  -0.46174300
  0.32100000  -0.46174301
  0.32100000  -0.46174303
  0.32100000  -0.46174304
  0.32100000  -0.46174305
  0.32100000  -0.46174306
  0.32100000  -0.46174308
  0.32100000  -0.46174309
  0.32100000  -0.46174310
  0.32100000  -0.46174311
  0.32100000  -0.46174312
  0.32100000  -0.46174314
  0.32100000  -0.46174315
  0.32100000  -0.46174316
  0.32100000  -0.46174317
  0.32100000  -0.46174319
  0.32100000  -0.46174320
  0.32100000  -0.46174321
  0.32100000  -0.46174322
  0.32100000  -0.46174323
  0.32100000  -0.46174325
  0.32100000  -0.46174326
  0.32100000  -0.46174327
  0.32100000  -0.46174328
  0.32100000  -0.46174329
  0.32100000  -0.46174331
  0.32100000  -0.46174332
  0.32100000  -0.46174333
  0.32100000  -0.46174334
  0.32100000  -0.46174335
  0.32100000  -0.46174337
  0.32100000  -0.46174338
  0.32100000  -0.46174339
  0.32200000  -0.46241218
  0.32200000  -0.46241219
  0.32200000  -0.46241220
  0.32200000  -0.46241221
  0.32200000  -0.46241223
  0.32200000  -0.46241224
  0.32200000  -0.46241225
  0.32200000  -0.46241226
  0.32200000  -0.46241228
  0.32200000  -0.46241229
  0.32200000  -0.46241230
  0.32200000  -0.46241231
  0.32200000  -0.46241233
  0.32200000  -0.46241234
  0.32200000  -0.46241235
  0.32200000  -0.46241236
  0.32200000  -0.46241238
  0.32200000  -0.46241239
  0.32200000  -0.46241240
  0.32200000  -0.46241241
  0.32200000  -0.46241242
  0.32200000  -0.46241244
  0.32200000  -0.46241245
  0.32200000  -0.46241246
  0.32200000  -0.46241247
  0.32200000  -0.46241249
  0.32200000  -0.46241250
  0.32200000  -0.46241251
  0.32200000  -0.46241252
  0.32200000  -0.46241253
  0.32200000  -0.46241255
  0.32200000  -0.46241256
  0.32200000  -0.46241257
  0.32200000  -0.46241258
  0.32200000  -0.46241259
  0.32200000  -0.46241261
  0.32200000  -0.46241262
  0.32200000  -0.46241263
  0.32200000  -0.46241264
  0.32200000  -0.46241265
  0.32300000  -0.46307942
  0.32300000  -0.46307943
  0.32300000  -0.46307945
  0.32300000  -0.46307946
  0.32300000  -0.46307947
  0.32300000  -0.46307949
  0.32300000  -0.46307950
  0.32300000  -0.46307951
  0.32300000  -0.46307952
  0.32300000  -0.46307954
  0.32300000  -0.46307955
  0.32300000  -0.46307956
  0.32300000  -0.46307957
  0.32300000  -0.46307959
  0.32300000  -0.46307960
  0.32300000  -0.46307961
  0.32300000  -0.46307962
  0.32300000  -0.46307964
  0.32300000  -0.46307965
  0.32300000  -0.46307966
  0.32300000  -0.46307967
  0.32300000  -0.46307968
  0.32300000  -0.46307970
  0.32300000  -0.46307971
  0.32300000  -0.46307972
  0.32300000  -0.46307973
  0.32300000  -0.46307974
  0.32300000  -0.46307976
  0.32300000  -0.46307977
  0.32300000  -0.46307978
  0.32300000  -0.46307979
  0.32300000  -0.46307980
  0.32300000  -0.46307982
  0.32300000  -0.46307983
  0.32300000  -0.46307984
  0.32300000  -0.46307985
  0.32300000  -0.46307986
  0.32300000  -0.46307988
  0.32300000  -0.46307989
  0.32300000  -0.46307990
  0.32400000  -0.46374466
  0.32400000  -0.46374468
  0.32400000  -0.46374469
  0.32400000  -0.46374470
  0.32400000  -0.46374471
  0.32400000  -0.46374473
  0.32400000  -0.46374474
  0.32400000  -0.46374475
  0.32400000  -0.46374476
  0.32400000  -0.46374478
  0.32400000  -0.46374479
  0.32400000  -0.46374480
  0.32400000  -0.46374481
  0.32400000  -0.46374483
  0.32400000  -0.46374484
  0.32400000  -0.46374485
  0.32400000  -0.46374486
  0.32400000  -0.46374488
  0.32400000  -0.46374489
  0.32400000  -0.46374490
  0.32400000  -0.46374491
  0.32400000  -0.46374493
  0.32400000  -0.46374494
  0.32400000  -0.46374495
  0.32400000  -0.46374496
  0.32400000  -0.46374497
  0.32400000  -0.46374499
  0.32400000  -0.46374500
  0.32400000  -0.46374501
  0.32400000  -0.46374502
  0.32400000  -0.46374504
  0.32400000  -0.46374505
  0.32400000  -0.46374506
  0.32400000  -0.46374507
  0.32400000  -0.46374508
  0.32400000  -0.46374509
  0.32400000  -0.46374511
  0.32400000  -0.46374512
  0.32400000  -0.46374513
  0.32400000  -0.46374514
  0.32500000  -0.46440791
  0.32500000  -0.46440792
  0.32500000  -0.46440794
  0.32500000  -0.46440795
  0.32500000  -0.46440796
  0.32500000  -0.46440797
  0.32500000  -0.46440799
  0.32500000  -0.46440800
  0.32500000  -0.46440801
  0.32500000  -0.46440803
  0.32500000  -0.46440804
  0.32500000  -0.46440805
  0.32500000  -0.46440806
  0.32500000  -0.46440808
  0.32500000  -0.46440809
  0.32500000  -0.46440810
  0.32500000  -0.46440811
  0.32500000  -0.46440812
  0.32500000  -0.46440814
  0.32500000  -0.46440815
  0.32500000  -0.46440816
  0.32500000  -0.46440817
  0.32500000  -0.46440819
  0.32500000  -0.46440820
  0.32500000  -0.46440821
  0.32500000  -0.46440822
  0.32500000  -0.46440823
  0.32500000  -0.46440825
  0.32500000  -0.46440826
  0.32500000  -0.46440827
  0.32500000  -0.46440828
  0.32500000  -0.46440830
  0.32500000  -0.46440831
  0.32500000  -0.46440832
  0.32500000  -0.46440833
  0.32500000  -0.46440834
  0.32500000  -0.46440835
  0.32500000  -0.46440837
  0.32500000  -0.46440838
  0.32500000  -0.46440839
  0.32600000  -0.46506918
  0.32600000  -0.46506919
  0.32600000  -0.46506920
  0.32600000  -0.46506921
  0.32600000  -0.46506923
  0.32600000  -0.46506924
  0.32600000  -0.46506925
  0.32600000  -0.46506926
  0.32600000  -0.46506928
  0.32600000  -0.46506929
  0.32600000  -0.46506930
  0.32600000  -0.46506931
  0.32600000  -0.46506933
  0.32600000  -0.46506934
  0.32600000  -0.46506935
  0.32600000  -0.46506936
  0.32600000  -0.46506938
  0.32600000  -0.46506939
  0.32600000  -0.46506940
  0.32600000  -0.46506941
  0.32600000  -0.46506943
  0.32600000  -0.46506944
  0.32600000  -0.46506945
  0.32600000  -0.46506946
  0.32600000  -0.46506948
  0.32600000  -0.46506949
  0.32600000  -0.46506950
  0.32600000  -0.46506951
  0.32600000  -0.46506952
  0.32600000  -0.46506954
  0.32600000  -0.46506955
  0.32600000  -0.46506956
  0.32600000  -0.46506957
  0.32600000  -0.46506958
  0.32600000  -0.46506960
  0.32600000  -0.46506961
  0.32600000  -0.46506962
  0.32600000  -0.46506963
  0.32600000  -0.46506964
  0.32600000  -0.46506966
  0.32700000  -0.46572847
  0.32700000  -0.46572848
  0.32700000  -0.46572849
  0.32700000  -0.46572851
  0.32700000  -0.46572852
  0.32700000  -0.46572853
  0.32700000  -0.46572854
  0.32700000  -0.46572856
  0.32700000  -0.46572857
  0.32700000  -0.46572858
  0.32700000  -0.46572859
  0.32700000  -0.46572861
  0.32700000  -0.46572862
  0.32700000  -0.46572863
  0.32700000  -0.46572864
  0.32700000  -0.46572866
  0.32700000  -0.46572867
  0.32700000  -0.46572868
  0.32700000  -0.46572869
  0.32700000  -0.46572871
  0.32700000  -0.46572872
  0.32700000  -0.46572873
  0.32700000  -0.46572874
  0.32700000  -0.46572876
  0.32700000  -0.46572877
  0.32700000  -0.46572878
  0.32700000  -0.46572879
  0.32700000  -0.46572880
  0.32700000  -0.46572882
  0.32700000  -0.46572883
  0.32700000  -0.46572884
  0.32700000  -0.46572885
  0.32700000  -0.46572886
  0.32700000  -0.46572888
  0.32700000  -0.46572889
  0.32700000  -0.46572890
  0.32700000  -0.46572891
  0.32700000  -0.46572892
  0.32700000  -0.46572894
  0.32700000  -0.46572895
  0.32800000  -0.46638580
  0.32800000  -0.46638581
  0.32800000  -0.46638582
  0.32800000  -0.46638584
  0.32800000  -0.46638585
  0.32800000  -0.46638586
  0.32800000  -0.46638587
  0.32800000  -0.46638589
  0.32800000  -0.46638590
  0.32800000  -0.46638591
  0.32800000  -0.46638593
  0.32800000  -0.46638594
  0.32800000  -0.46638595
  0.32800000  -0.46638596
  0.32800000  -0.46638598
  0.32800000  -0.46638599
  0.32800000  -0.46638600
  0.32800000  -0.46638601
  0.32800000  -0.46638603
  0.32800000  -0.46638604
  0.32800000  -0.46638605
  0.32800000  -0.46638606
  0.32800000  -0.46638607
  0.32800000  -0.46638609
  0.32800000  -0.46638610
  0.32800000  -0.46638611
  0.32800000  -0.46638612
  0.32800000  -0.46638614
  0.32800000  -0.46638615
  0.32800000  -0.46638616
  0.32800000  -0.46638617
  0.32800000  -0.46638618
  0.32800000  -0.46638620
  0.32800000  -0.46638621
  0.32800000  -0.46638622
  0.32800000  -0.46638623
  0.32800000  -0.46638624
  0.32800000  -0.46638626
  0.32800000  -0.46638627
  0.32800000  -0.46638628
  0.32900000  -0.46704118
  0.32900000  -0.46704119
  0.32900000  -0.46704120
  0.32900000  -0.46704122
  0.32900000  -0.46704123
  0.32900000  -0.46704124
  0.32900000  -0.46704125
  0.32900000  -0.46704127
  0.32900000  -0.46704128
  0.32900000  -0.46704129
  0.32900000  -0.46704131
  0.32900000  -0.46704132
  0.32900000  -0.46704133
  0.32900000  -0.46704134
  0.32900000  -0.46704136
  0.32900000  -0.46704137
  0.32900000  -0.46704138
  0.32900000  -0.46704139
  0.32900000  -0.46704141
  0.32900000  -0.46704142
  0.32900000  -0.46704143
  0.32900000  -0.46704144
  0.32900000  -0.46704146
  0.32900000  -0.46704147
  0.32900000  -0.46704148
  0.32900000  -0.46704149
  0.32900000  -0.46704150
  0.32900000  -0.46704152
  0.32900000  -0.46704153
  0.32900000  -0.46704154
  0.32900000  -0.46704155
  0.32900000  -0.46704156
  0.32900000  -0.46704158
  0.32900000  -0.46704159
  0.32900000  -0.46704160
  0.32900000  -0.46704161
  0.32900000  -0.46704162
  0.32900000  -0.46704164
  0.32900000  -0.46704165
  0.32900000  -0.46704166
  0.33000000  -0.46769462
  0.33000000  -0.46769463
  0.33000000  -0.46769464
  0.33000000  -0.46769466
  0.33000000  -0.46769467
  0.33000000  -0.46769468
  0.33000000  -0.46769469
  0.33000000  -0.46769471
  0.33000000  -0.46769472
  0.33000000  -0.46769473
  0.33000000  -0.46769475
  0.33000000  -0.46769476
  0.33000000  -0.46769477
  0.33000000  -0.46769478
  0.33000000  -0.46769480
  0.33000000  -0.46769481
  0.33000000  -0.46769482
  0.33000000  -0.46769483
  0.33000000  -0.46769485
  0.33000000  -0.46769486
  0.33000000  -0.46769487
  0.33000000  -0.46769488
  0.33000000  -0.46769490
  0.33000000  -0.46769491
  0.33000000  -0.46769492
  0.33000000  -0.46769493
  0.33000000  -0.46769494
  0.33000000  -0.46769496
  0.33000000  -0.46769497
  0.33000000  -0.46769498
  0.33000000  -0.46769499
  0.33000000  -0.46769501
  0.33000000  -0.46769502
  0.33000000  -0.46769503
  0.33000000  -0.46769504
  0.33000000  -0.46769505
  0.33000000  -0.46769507
  0.33000000  -0.46769508
  0.33000000  -0.46769509
  0.33000000  -0.46769510
  0.33100000  -0.46834613
  0.33100000  -0.46834614
  0.33100000  -0.46834615
  0.33100000  -0.46834617
  0.33100000  -0.46834618
  0.33100000  -0.46834619
  0.33100000  -0.46834621
  0.33100000  -0.46834622
  0.33100000  -0.46834623
  0.33100000  -0.46834624
  0.33100000  -0.46834626
  0.33100000  -0.46834627
  0.33100000  -0.46834628
  0.33100000  -0.46834629
  0.33100000  -0.46834631
  0.33100000  -0.46834632
  0.33100000  -0.46834633
  0.33100000  -0.46834634
  0.33100000  -0.46834636
  0.33100000  -0.46834637
  0.33100000  -0.46834638
  0.33100000  -0.46834639
  0.33100000  -0.46834641
  0.33100000  -0.46834642
  0.33100000  -0.46834643
  0.33100000  -0.46834644
  0.33100000  -0.46834646
  0.33100000  -0.46834647
  0.33100000  -0.46834648
  0.33100000  -0.46834649
  0.33100000  -0.46834650
  0.33100000  -0.46834652
  0.33100000  -0.46834653
  0.33100000  -0.46834654
  0.33100000  -0.46834655
  0.33100000  -0.46834656
  0.33100000  -0.46834658
  0.33100000  -0.46834659
  0.33100000  -0.46834660
  0.33100000  -0.46834661
  0.33200000  -0.46899572
  0.33200000  -0.46899573
  0.33200000  -0.46899575
  0.33200000  -0.46899576
  0.33200000  -0.46899577
  0.33200000  -0.46899578
  0.33200000  -0.46899580
  0.33200000  -0.46899581
  0.33200000  -0.46899582
  0.33200000  -0.46899583
  0.33200000  -0.46899585
  0.33200000  -0.46899586
  0.33200000  -0.46899587
  0.33200000  -0.46899589
  0.33200000  -0.46899590
  0.33200000  -0.46899591
  0.33200000  -0.46899592
  0.33200000  -0.46899594
  0.33200000  -0.46899595
  0.33200000  -0.46899596
  0.33200000  -0.46899597
  0.33200000  -0.46899599
  0.33200000  -0.46899600
  0.33200000  -0.46899601
  0.33200000  -0.46899602
  0.33200000  -0.46899603
  0.33200000  -0.46899605
  0.33200000  -0.46899606
  0.33200000  -0.46899607
  0.33200000  -0.46899608
  0.33200000  -0.46899610
  0.33200000  -0.46899611
  0.33200000  -0.46899612
  0.33200000  -0.46899613
  0.33200000  -0.46899614
  0.33200000  -0.46899616
  0.33200000  -0.46899617
  0.33200000  -0.46899618
  0.33200000  -0.46899619
  0.33200000  -0.46899620
  0.33300000  -0.46964340
  0.33300000  -0.46964341
  0.33300000  -0.46964343
  0.33300000  -0.46964344
  0.33300000  -0.46964345
  0.33300000  -0.46964347
  0.33300000  -0.46964348
  0.33300000  -0.46964349
  0.33300000  -0.46964350
  0.33300000  -0.46964352
  0.33300000  -0.46964353
  0.33300000  -0.46964354
  0.33300000  -0.46964356
  0.33300000  -0.46964357
  0.33300000  -0.46964358
  0.33300000  -0.46964359
  0.33300000  -0.46964361
  0.33300000  -0.46964362
  0.33300000  -0.46964363
  0.33300000  -0.46964364
  0.33300000  -0.46964366
  0.33300000  -0.46964367
  0.33300000  -0.46964368
  0.33300000  -0.46964369
  0.33300000  -0.46964370
  0.33300000  -0.46964372
  0.33300000  -0.46964373
  0.33300000  -0.46964374
  0.33300000  -0.46964375
  0.33300000  -0.46964377
  0.33300000  -0.46964378
  0.33300000  -0.46964379
  0.33300000  -0.46964380
  0.33300000  -0.46964381
  0.33300000  -0.46964383
  0.33300000  -0.46964384
  0.33300000  -0.46964385
  0.33300000  -0.46964386
  0.33300000  -0.46964388
  0.33300000  -0.46964389
  0.33400000  -0.47028918
  0.33400000  -0.47028920
  0.33400000  -0.47028921
  0.33400000  -0.47028922
  0.33400000  -0.47028924
  0.33400000  -0.47028925
  0.33400000  -0.47028926
  0.33400000  -0.47028928
  0.33400000  -0.47028929
  0.33400000  -0.47028930
  0.33400000  -0.47028931
  0.33400000  -0.47028933
  0.33400000  -0.47028934
  0.33400000  -0.47028935
  0.33400000  -0.47028936
  0.33400000  -0.47028938
  0.33400000  -0.47028939
  0.33400000  -0.47028940
  0.33400000  -0.47028941
  0.33400000  -0.47028943
  0.33400000  -0.47028944
  0.33400000  -0.47028945
  0.33400000  -0.47028946
  0.33400000  -0.47028948
  0.33400000  -0.47028949
  0.33400000  -0.47028950
  0.33400000  -0.47028951
  0.33400000  -0.47028953
  0.33400000  -0.47028954
  0.33400000  -0.47028955
  0.33400000  -0.47028956
  0.33400000  -0.47028957
  0.33400000  -0.47028959
  0.33400000  -0.47028960
  0.33400000  -0.47028961
  0.33400000  -0.47028962
  0.33400000  -0.47028964
  0.33400000  -0.47028965
  0.33400000  -0.47028966
  0.33400000  -0.47028967
  0.33500000  -0.47093308
  0.33500000  -0.47093309
  0.33500000  -0.47093311
  0.33500000  -0.47093312
  0.33500000  -0.47093313
  0.33500000  -0.47093314
  0.33500000  -0.47093316
  0.33500000  -0.47093317
  0.33500000  -0.47093318
  0.33500000  -0.47093320
  0.33500000  -0.47093321
  0.33500000  -0.47093322
  0.33500000  -0.47093323
  0.33500000  -0.47093325
  0.33500000  -0.47093326
  0.33500000  -0.47093327
  0.33500000  -0.47093328
  0.33500000  -0.47093330
  0.33500000  -0.47093331
  0.33500000  -0.47093332
  0.33500000  -0.47093333
  0.33500000  -0.47093335
  0.33500000  -0.47093336
  0.33500000  -0.47093337
  0.33500000  -0.47093338
  0.33500000  -0.47093340
  0.33500000  -0.47093341
  0.33500000  -0.47093342
  0.33500000  -0.47093343
  0.33500000  -0.47093345
  0.33500000  -0.47093346
  0.33500000  -0.47093347
  0.33500000  -0.47093348
  0.33500000  -0.47093349
  0.33500000  -0.47093351
  0.33500000  -0.47093352
  0.33500000  -0.47093353
  0.33500000  -0.47093354
  0.33500000  -0.47093356
  0.33500000  -0.47093357
  0.33600000  -0.47157510
  0.33600000  -0.47157511
  0.33600000  -0.47157512
  0.33600000  -0.47157514
  0.33600000  -0.47157515
  0.33600000  -0.47157516
  0.33600000  -0.47157517
  0.33600000  -0.47157519
  0.33600000  -0.47157520
  0.33600000  -0.47157521
  0.33600000  -0.47157523
  0.33600000  -0.47157524
  0.33600000  -0.47157525
  0.33600000  -0.47157526
  0.33600000  -0.47157528
  0.33600000  -0.47157529
  0.33600000  -0.47157530
  0.33600000  -0.47157531
  0.33600000  -0.47157533
  0.33600000  -0.47157534
  0.33600000  -0.47157535
  0.33600000  -0.47157536
  0.33600000  -0.47157538
  0.33600000  -0.47157539
  0.33600000  -0.47157540
  0.33600000  -0.47157541
  0.33600000  -0.47157543
  0.33600000  -0.47157544
  0.33600000  -0.47157545
  0.33600000  -0.47157546
  0.33600000  -0.47157548
  0.33600000  -0.47157549
  0.33600000  -0.47157550
  0.33600000  -0.47157551
  0.33600000  -0.47157552
  0.33600000  -0.47157554
  0.33600000  -0.47157555
  0.33600000  -0.47157556
  0.33600000  -0.47157557
  0.33600000  -0.47157558
  0.33700000  -0.47221524
  0.33700000  -0.47221526
  0.33700000  -0.47221527
  0.33700000  -0.47221528
  0.33700000  -0.47221530
  0.33700000  -0.47221531
  0.33700000  -0.47221532
  0.33700000  -0.47221534
  0.33700000  -0.47221535
  0.33700000  -0.47221536
  0.33700000  -0.47221537
  0.33700000  -0.47221539
  0.33700000  -0.47221540
  0.33700000  -0.47221541
  0.33700000  -0.47221542
  0.33700000  -0.47221544
  0.33700000  -0.47221545
  0.33700000  -0.47221546
  0.33700000  -0.47221548
  0.33700000  -0.47221549
  0.33700000  -0.47221550
  0.33700000  -0.47221551
  0.33700000  -0.47221553
  0.33700000  -0.47221554
  0.33700000  -0.47221555
  0.33700000  -0.47221556
  0.33700000  -0.47221557
  0.33700000  -0.47221559
  0.33700000  -0.47221560
  0.33700000  -0.47221561
  0.33700000  -0.47221562
  0.33700000  -0.47221564
  0.33700000  -0.47221565
  0.33700000  -0.47221566
  0.33700000  -0.47221567
  0.33700000  -0.47221569
  0.33700000  -0.47221570
  0.33700000  -0.47221571
  0.33700000  -0.47221572
  0.33700000  -0.47221573
  0.33800000  -0.47285353
  0.33800000  -0.47285355
  0.33800000  -0.47285356
  0.33800000  -0.47285357
  0.33800000  -0.47285359
  0.33800000  -0.47285360
  0.33800000  -0.47285361
  0.33800000  -0.47285363
  0.33800000  -0.47285364
  0.33800000  -0.47285365
  0.33800000  -0.47285366
  0.33800000  -0.47285368
  0.33800000  -0.47285369
  0.33800000  -0.47285370
  0.33800000  -0.47285371
  0.33800000  -0.47285373
  0.33800000  -0.47285374
  0.33800000  -0.47285375
  0.33800000  -0.47285377
  0.33800000  -0.47285378
  0.33800000  -0.47285379
  0.33800000  -0.47285380
  0.33800000  -0.47285382
  0.33800000  -0.47285383
  0.33800000  -0.47285384
  0.33800000  -0.47285385
  0.33800000  -0.47285387
  0.33800000  -0.47285388
  0.33800000  -0.47285389
  0.33800000  -0.47285390
  0.33800000  -0.47285391
  0.33800000  -0.47285393
  0.33800000  -0.47285394
  0.33800000  -0.47285395
  0.33800000  -0.47285396
  0.33800000  -0.47285398
  0.33800000  -0.47285399
  0.33800000  -0.47285400
  0.33800000  -0.47285401
  0.33800000  -0.47285402
  0.33900000  -0.47348998
  0.33900000  -0.47348999
  0.33900000  -0.47349000
  0.33900000  -0.47349001
  0.33900000  -0.47349003
  0.33900000  -0.47349004
  0.33900000  -0.47349005
  0.33900000  -0.47349007
  0.33900000  -0.47349008
  0.33900000  -0.47349009
  0.33900000  -0.47349011
  0.33900000  -0.47349012
  0.33900000  -0.47349013
  0.33900000  -0.47349014
  0.33900000  -0.47349016
  0.33900000  -0.47349017
  0.33900000  -0.47349018
  0.33900000  -0.47349019
  0.33900000  -0.47349021
  0.33900000  -0.47349022
  0.33900000  -0.47349023
  0.33900000  -0.47349024
  0.33900000  -0.47349026
  0.33900000  -0.47349027
  0.33900000  -0.47349028
  0.33900000  -0.47349029
  0.33900000  -0.47349031
  0.33900000  -0.47349032
  0.33900000  -0.47349033
  0.33900000  -0.47349034
  0.33900000  -0.47349036
  0.33900000  -0.47349037
  0.33900000  -0.47349038
  0.33900000  -0.47349039
  0.33900000  -0.47349040
  0.33900000  -0.47349042
  0.33900000  -0.47349043
  0.33900000  -0.47349044
  0.33900000  -0.47349045
  0.33900000  -0.47349047
  0.34000000  -0.47412458
  0.34000000  -0.47412459
  0.34000000  -0.47412460
  0.34000000  -0.47412462
  0.34000000  -0.47412463
  0.34000000  -0.47412464
  0.34000000  -0.47412466
  0.34000000  -0.47412467
  0.34000000  -0.47412468
  0.34000000  -0.47412469
  0.34000000  -0.47412471
  0.34000000  -0.47412472
  0.34000000  -0.47412473
  0.34000000  -0.47412475
  0.34000000  -0.47412476
  0.34000000  -0.47412477
  0.34000000  -0.47412478
  0.34000000  -0.47412480
  0.34000000  -0.47412481
  0.34000000  -0.47412482
  0.34000000  -0.47412483
  0.34000000  -0.47412485
  0.34000000  -0.47412486
  0.34000000  -0.47412487
  0.34000000  -0.47412488
  0.34000000  -0.47412490
  0.34000000  -0.47412491
  0.34000000  -0.47412492
  0.34000000  -0.47412493
  0.34000000  -0.47412495
  0.34000000  -0.47412496
  0.34000000  -0.47412497
  0.34000000  -0.47412498
  0.34000000  -0.47412500
  0.34000000  -0.47412501
  0.34000000  -0.47412502
  0.34000000  -0.47412503
  0.34000000  -0.47412504
  0.34000000  -0.47412506
  0.34000000  -0.47412507
  0.34100000  -0.47475735
  0.34100000  -0.47475736
  0.34100000  -0.47475738
  0.34100000  -0.47475739
  0.34100000  -0.47475740
  0.34100000  -0.47475742
  0.34100000  -0.47475743
  0.34100000  -0.47475744
  0.34100000  -0.47475745
  0.34100000  -0.47475747
  0.34100000  -0.47475748
  0.34100000  -0.47475749
  0.34100000  -0.47475751
  0.34100000  -0.47475752
  0.34100000  -0.47475753
  0.34100000  -0.47475754
  0.34100000  -0.47475756
  0.34100000  -0.47475757
  0.34100000  -0.47475758
  0.34100000  -0.47475759
  0.34100000  -0.47475761
  0.34100000  -0.47475762
  0.34100000  -0.47475763
  0.34100000  -0.47475765
  0.34100000  -0.47475766
  0.34100000  -0.47475767
  0.34100000  -0.47475768
  0.34100000  -0.47475769
  0.34100000  -0.47475771
  0.34100000  -0.47475772
  0.34100000  -0.47475773
  0.34100000  -0.47475774
  0.34100000  -0.47475776
  0.34100000  -0.47475777
  0.34100000  -0.47475778
  0.34100000  -0.47475779
  0.34100000  -0.47475781
  0.34100000  -0.47475782
  0.34100000  -0.47475783
  0.34100000  -0.47475784
  0.34200000  -0.47538830
  0.34200000  -0.47538832
  0.34200000  -0.47538833
  0.34200000  -0.47538834
  0.34200000  -0.47538836
  0.34200000  -0.47538837
  0.34200000  -0.47538838
  0.34200000  -0.47538839
  0.34200000  -0.47538841
  0.34200000  -0.47538842
  0.34200000  -0.47538843
  0.34200000  -0.47538845
  0.34200000  -0.47538846
  0.34200000  -0.47538847
  0.34200000  -0.47538848
  0.34200000  -0.47538850
  0.34200000  -0.47538851
  0.34200000  -0.47538852
  0.34200000  -0.47538854
  0.34200000  -0.47538855
  0.34200000  -0.47538856
  0.34200000  -0.47538857
  0.34200000  -0.47538859
  0.34200000  -0.47538860
  0.34200000  -0.47538861
  0.34200000  -0.47538862
  0.34200000  -0.47538864
  0.34200000  -0.47538865
  0.34200000  -0.47538866
  0.34200000  -0.47538867
  0.34200000  -0.47538869
  0.34200000  -0.47538870
  0.34200000  -0.47538871
  0.34200000  -0.47538872
  0.34200000  -0.47538873
  0.34200000  -0.47538875
  0.34200000  -0.47538876
  0.34200000  -0.47538877
  0.34200000  -0.47538878
  0.34200000  -0.47538880
  0.34300000  -0.47601745
  0.34300000  -0.47601746
  0.34300000  -0.47601747
  0.34300000  -0.47601749
  0.34300000  -0.47601750
  0.34300000  -0.47601751
  0.34300000  -0.47601752
  0.34300000  -0.47601754
  0.34300000  -0.47601755
  0.34300000  -0.47601756
  0.34300000  -0.47601758
  0.34300000  -0.47601759
  0.34300000  -0.47601760
  0.34300000  -0.47601762
  0.34300000  -0.47601763
  0.34300000  -0.47601764
  0.34300000  -0.47601765
  0.34300000  -0.47601767
  0.34300000  -0.47601768
  0.34300000  -0.47601769
  0.34300000  -0.47601770
  0.34300000  -0.47601772
  0.34300000  -0.47601773
  0.34300000  -0.47601774
  0.34300000  -0.47601775
  0.34300000  -0.47601777
  0.34300000  -0.47601778
  0.34300000  -0.47601779
  0.34300000  -0.47601780
  0.34300000  -0.47601782
  0.34300000  -0.47601783
  0.34300000  -0.47601784
  0.34300000  -0.47601785
  0.34300000  -0.47601787
  0.34300000  -0.47601788
  0.34300000  -0.47601789
  0.34300000  -0.47601790
  0.34300000  -0.47601791
  0.34300000  -0.47601793
  0.34300000  -0.47601794
  0.34400000  -0.47664479
  0.34400000  -0.47664480
  0.34400000  -0.47664481
  0.34400000  -0.47664483
  0.34400000  -0.47664484
  0.34400000  -0.47664485
  0.34400000  -0.47664487
  0.34400000  -0.47664488
  0.34400000  -0.47664489
  0.34400000  -0.47664491
  0.34400000  -0.47664492
  0.34400000  -0.47664493
  0.34400000  -0.47664494
  0.34400000  -0.47664496
  0.34400000  -0.47664497
  0.34400000  -0.47664498
  0.34400000  -0.47664500
  0.34400000  -0.47664501
  0.34400000  -0.47664502
  0.34400000  -0.47664503
  0.34400000  -0.47664505
  0.34400000  -0.47664506
  0.34400000  -0.47664507
  0.34400000  -0.47664508
  0.34400000  -0.47664510
  0.34400000  -0.47664511
  0.34400000  -0.47664512
  0.34400000  -0.47664513
  0.34400000  -0.47664515
  0.34400000  -0.47664516
  0.34400000  -0.47664517
  0.34400000  -0.47664518
  0.34400000  -0.47664520
  0.34400000  -0.47664521
  0.34400000  -0.47664522
  0.34400000  -0.47664523
  0.34400000  -0.47664525
  0.34400000  -0.47664526
  0.34400000  -0.47664527
  0.34400000  -0.47664528
  0.34500000  -0.47727034
  0.34500000  -0.47727035
  0.34500000  -0.47727037
  0.34500000  -0.47727038
  0.34500000  -0.47727039
  0.34500000  -0.47727040
  0.34500000  -0.47727042
  0.34500000  -0.47727043
  0.34500000  -0.47727044
  0.34500000  -0.47727046
  0.34500000  -0.47727047
  0.34500000  -0.47727048
  0.34500000  -0.47727050
  0.34500000  -0.47727051
  0.34500000  -0.47727052
  0.34500000  -0.47727053
  0.34500000  -0.47727055
  0.34500000  -0.47727056
  0.34500000  -0.47727057
  0.34500000  -0.47727058
  0.34500000  -0.47727060
  0.34500000  -0.47727061
  0.34500000  -0.47727062
  0.34500000  -0.47727064
  0.34500000  -0.47727065
  0.34500000  -0.47727066
  0.34500000  -0.47727067
  0.34500000  -0.47727069
  0.34500000  -0.47727070
  0.34500000  -0.47727071
  0.34500000  -0.47727072
  0.34500000  -0.47727074
  0.34500000  -0.47727075
  0.34500000  -0.47727076
  0.34500000  -0.47727077
  0.34500000  -0.47727078
  0.34500000  -0.47727080
  0.34500000  -0.47727081
  0.34500000  -0.47727082
  0.34500000  -0.47727083
  0.34600000  -0.47789411
  0.34600000  -0.47789412
  0.34600000  -0.47789413
  0.34600000  -0.47789415
  0.34600000  -0.47789416
  0.34600000  -0.47789417
  0.34600000  -0.47789419
  0.34600000  -0.47789420
  0.34600000  -0.47789421
  0.34600000  -0.47789423
  0.34600000  -0.47789424
  0.34600000  -0.47789425
  0.34600000  -0.47789426
  0.34600000  -0.47789428
  0.34600000  -0.47789429
  0.34600000  -0.47789430
  0.34600000  -0.47789432
  0.34600000  -0.47789433
  0.34600000  -0.47789434
  0.34600000  -0.47789435
  0.34600000  -0.47789437
  0.34600000  -0.47789438
  0.34600000  -0.47789439
  0.34600000  -0.47789440
  0.34600000  -0.47789442
  0.34600000  -0.47789443
  0.34600000  -0.47789444
  0.34600000  -0.47789445
  0.34600000  -0.47789447
  0.34600000  -0.47789448
  0.34600000  -0.47789449
  0.34600000  -0.47789450
  0.34600000  -0.47789452
  0.34600000  -0.47789453
  0.34600000  -0.47789454
  0.34600000  -0.47789455
  0.34600000  -0.47789457
  0.34600000  -0.47789458
  0.34600000  -0.47789459
  0.34600000  -0.47789460
  0.34700000  -0.47851610
  0.34700000  -0.47851612
  0.34700000  -0.47851613
  0.34700000  -0.47851614
  0.34700000  -0.47851616
  0.34700000  -0.47851617
  0.34700000  -0.47851618
  0.34700000  -0.47851620
  0.34700000  -0.47851621
  0.34700000  -0.47851622
  0.34700000  -0.47851623
  0.34700000  -0.47851625
  0.34700000  -0.47851626
  0.34700000  -0.47851627
  0.34700000  -0.47851629
  0.34700000  -0.47851630
  0.34700000  -0.47851631
  0.34700000  -0.47851632
  0.34700000  -0.47851634
  0.34700000  -0.47851635
  0.34700000  -0.47851636
  0.34700000  -0.47851637
  0.34700000  -0.47851639
  0.34700000  -0.47851640
  0.34700000  -0.47851641
  0.34700000  -0.47851643
  0.34700000  -0.47851644
  0.34700000  -0.47851645
  0.34700000  -0.47851646
  0.34700000  -0.47851648
  0.34700000  -0.47851649
  0.34700000  -0.47851650
  0.34700000  -0.47851651
  0.34700000  -0.47851652
  0.34700000  -0.47851654
  0.34700000  -0.47851655
  0.34700000  -0.47851656
  0.34700000  -0.47851657
  0.34700000  -0.47851659
  0.34700000  -0.47851660
  0.34800000  -0.47913633
  0.34800000  -0.47913635
  0.34800000  -0.47913636
  0.34800000  -0.47913637
  0.34800000  -0.47913639
  0.34800000  -0.47913640
  0.34800000  -0.47913641
  0.34800000  -0.47913643
  0.34800000  -0.47913644
  0.34800000  -0.47913645
  0.34800000  -0.47913647
  0.34800000  -0.47913648
  0.34800000  -0.47913649
  0.34800000  -0.47913650
  0.34800000  -0.47913652
  0.34800000  -0.47913653
  0.34800000  -0.47913654
  0.34800000  -0.47913656
  0.34800000  -0.47913657
  0.34800000  -0.47913658
  0.34800000  -0.47913659
  0.34800000  -0.47913661
  0.34800000  -0.47913662
  0.34800000  -0.47913663
  0.34800000  -0.47913664
  0.34800000  -0.47913666
  0.34800000  -0.47913667
  0.34800000  -0.47913668
  0.34800000  -0.47913669
  0.34800000  -0.47913671
  0.34800000  -0.47913672
  0.34800000  -0.47913673
  0.34800000  -0.47913674
  0.34800000  -0.47913676
  0.34800000  -0.47913677
  0.34800000  -0.47913678
  0.34800000  -0.47913679
  0.34800000  -0.47913681
  0.34800000  -0.47913682
  0.34800000  -0.47913683
  0.34900000  -0.47975481
  0.34900000  -0.47975482
  0.34900000  -0.47975484
  0.34900000  -0.47975485
  0.34900000  -0.47975486
  0.34900000  -0.47975488
  0.34900000  -0.47975489
  0.34900000  -0.47975490
  0.34900000  -0.47975492
  0.34900000  -0.47975493
  0.34900000  -0.47975494
  0.34900000  -0.47975496
  0.34900000  -0.47975497
  0.34900000  -0.47975498
  0.34900000  -0.47975499
  0.34900000  -0.47975501
  0.34900000  -0.47975502
  0.34900000  -0.47975503
  0.34900000  -0.47975505
  0.34900000  -0.47975506
  0.34900000  -0.47975507
  0.34900000  -0.47975508
  0.34900000  -0.47975510
  0.34900000  -0.47975511
  0.34900000  -0.47975512
  0.34900000  -0.47975513
  0.34900000  -0.47975515
  0.34900000  -0.47975516
  0.34900000  -0.47975517
  0.34900000  -0.47975518
  0.34900000  -0.47975520
  0.34900000  -0.47975521
  0.34900000  -0.47975522
  0.34900000  -0.47975523
  0.34900000  -0.47975525
  0.34900000  -0.47975526
  0.34900000  -0.47975527
  0.34900000  -0.47975528
  0.34900000  -0.47975530
  0.34900000  -0.47975531
  0.35000000  -0.48037154
  0.35000000  -0.48037156
  0.35000000  -0.48037157
  0.35000000  -0.48037158
  0.35000000  -0.48037160
  0.35000000  -0.48037161
  0.35000000  -0.48037162
  0.35000000  -0.48037163
  0.35000000  -0.48037165
  0.35000000  -0.48037166
  0.35000000  -0.48037167
  0.35000000  -0.48037169
  0.35000000  -0.48037170
  0.35000000  -0.48037171
  0.35000000  -0.48037173
  0.35000000  -0.48037174
  0.35000000  -0.48037175
  0.35000000  -0.48037176
  0.35000000  -0.48037178
  0.35000000  -0.48037179
  0.35000000  -0.48037180
  0.35000000  -0.48037182
  0.35000000  -0.48037183
  0.35000000  -0.48037184
  0.35000000  -0.48037185
  0.35000000  -0.48037187
  0.35000000  -0.48037188
  0.35000000  -0.48037189
  0.35000000  -0.48037190
  0.35000000  -0.48037192
  0.35000000  -0.48037193
  0.35000000  -0.48037194
  0.35000000  -0.48037195
  0.35000000  -0.48037197
  0.35000000  -0.48037198
  0.35000000  -0.48037199
  0.35000000  -0.48037200
  0.35000000  -0.48037202
  0.35000000  -0.48037203
  0.35000000  -0.48037204
  0.35100000  -0.48098654
  0.35100000  -0.48098655
  0.35100000  -0.48098656
  0.35100000  -0.48098658
  0.35100000  -0.48098659
  0.35100000  -0.48098660
  0.35100000  -0.48098662
  0.35100000  -0.48098663
  0.35100000  -0.48098664
  0.35100000  -0.48098666
  0.35100000  -0.48098667
  0.35100000  -0.48098668
  0.35100000  -0.48098669
  0.35100000  -0.48098671
  0.35100000  -0.48098672
  0.35100000  -0.48098673
  0.35100000  -0.48098675
  0.35100000  -0.48098676
  0.35100000  -0.48098677
  0.35100000  -0.48098678
  0.35100000  -0.48098680
  0.35100000  -0.48098681
  0.35100000  -0.48098682
  0.35100000  -0.48098684
  0.35100000  -0.48098685
  0.35100000  -0.48098686
  0.35100000  -0.48098687
  0.35100000  -0.48098689
  0.35100000  -0.48098690
  0.35100000  -0.48098691
  0.35100000  -0.48098692
  0.35100000  -0.48098694
  0.35100000  -0.48098695
  0.35100000  -0.48098696
  0.35100000  -0.48098697
  0.35100000  -0.48098699
  0.35100000  -0.48098700
  0.35100000  -0.48098701
  0.35100000  -0.48098702
  0.35100000  -0.48098703
  0.35200000  -0.48159980
  0.35200000  -0.48159982
  0.35200000  -0.48159983
  0.35200000  -0.48159984
  0.35200000  -0.48159986
  0.35200000  -0.48159987
  0.35200000  -0.48159988
  0.35200000  -0.48159989
  0.35200000  -0.48159991
  0.35200000  -0.48159992
  0.35200000  -0.48159993
  0.35200000  -0.48159995
  0.35200000  -0.48159996
  0.35200000  -0.48159997
  0.35200000  -0.48159999
  0.35200000  -0.48160000
  0.35200000  -0.48160001
  0.35200000  -0.48160002
  0.35200000  -0.48160004
  0.35200000  -0.48160005
  0.35200000  -0.48160006
  0.35200000  -0.48160008
  0.35200000  -0.48160009
  0.35200000  -0.48160010
  0.35200000  -0.48160011
  0.35200000  -0.48160013
  0.35200000  -0.48160014
  0.35200000  -0.48160015
  0.35200000  -0.48160016
  0.35200000  -0.48160018
  0.35200000  -0.48160019
  0.35200000  -0.48160020
  0.35200000  -0.48160021
  0.35200000  -0.48160023
  0.35200000  -0.48160024
  0.35200000  -0.48160025
  0.35200000  -0.48160026
  0.35200000  -0.48160028
  0.35200000  -0.48160029
  0.35200000  -0.48160030
  0.35300000  -0.48221135
  0.35300000  -0.48221136
  0.35300000  -0.48221138
  0.35300000  -0.48221139
  0.35300000  -0.48221140
  0.35300000  -0.48221142
  0.35300000  -0.48221143
  0.35300000  -0.48221144
  0.35300000  -0.48221145
  0.35300000  -0.48221147
  0.35300000  -0.48221148
  0.35300000  -0.48221149
  0.35300000  -0.48221151
  0.35300000  -0.48221152
  0.35300000  -0.48221153
  0.35300000  -0.48221155
  0.35300000  -0.48221156
  0.35300000  -0.48221157
  0.35300000  -0.48221158
  0.35300000  -0.48221160
  0.35300000  -0.48221161
  0.35300000  -0.48221162
  0.35300000  -0.48221164
  0.35300000  -0.48221165
  0.35300000  -0.48221166
  0.35300000  -0.48221167
  0.35300000  -0.48221169
  0.35300000  -0.48221170
  0.35300000  -0.48221171
  0.35300000  -0.48221172
  0.35300000  -0.48221174
  0.35300000  -0.48221175
  0.35300000  -0.48221176
  0.35300000  -0.48221177
  0.35300000  -0.48221179
  0.35300000  -0.48221180
  0.35300000  -0.48221181
  0.35300000  -0.48221182
  0.35300000  -0.48221184
  0.35300000  -0.48221185
  0.35400000  -0.48282119
  0.35400000  -0.48282120
  0.35400000  -0.48282121
  0.35400000  -0.48282122
  0.35400000  -0.48282124
  0.35400000  -0.48282125
  0.35400000  -0.48282126
  0.35400000  -0.48282128
  0.35400000  -0.48282129
  0.35400000  -0.48282130
  0.35400000  -0.48282132
  0.35400000  -0.48282133
  0.35400000  -0.48282134
  0.35400000  -0.48282136
  0.35400000  -0.48282137
  0.35400000  -0.48282138
  0.35400000  -0.48282139
  0.35400000  -0.48282141
  0.35400000  -0.48282142
  0.35400000  -0.48282143
  0.35400000  -0.48282145
  0.35400000  -0.48282146
  0.35400000  -0.48282147
  0.35400000  -0.48282148
  0.35400000  -0.48282150
  0.35400000  -0.48282151
  0.35400000  -0.48282152
  0.35400000  -0.48282154
  0.35400000  -0.48282155
  0.35400000  -0.48282156
  0.35400000  -0.48282157
  0.35400000  -0.48282159
  0.35400000  -0.48282160
  0.35400000  -0.48282161
  0.35400000  -0.48282162
  0.35400000  -0.48282164
  0.35400000  -0.48282165
  0.35400000  -0.48282166
  0.35400000  -0.48282167
  0.35400000  -0.48282168
  0.35500000  -0.48342932
  0.35500000  -0.48342933
  0.35500000  -0.48342935
  0.35500000  -0.48342936
  0.35500000  -0.48342937
  0.35500000  -0.48342939
  0.35500000  -0.48342940
  0.35500000  -0.48342941
  0.35500000  -0.48342942
  0.35500000  -0.48342944
  0.35500000  -0.48342945
  0.35500000  -0.48342946
  0.35500000  -0.48342948
  0.35500000  -0.48342949
  0.35500000  -0.48342950
  0.35500000  -0.48342952
  0.35500000  -0.48342953
  0.35500000  -0.48342954
  0.35500000  -0.48342955
  0.35500000  -0.48342957
  0.35500000  -0.48342958
  0.35500000  -0.48342959
  0.35500000  -0.48342961
  0.35500000  -0.48342962
  0.35500000  -0.48342963
  0.35500000  -0.48342964
  0.35500000  -0.48342966
  0.35500000  -0.48342967
  0.35500000  -0.48342968
  0.35500000  -0.48342969
  0.35500000  -0.48342971
  0.35500000  -0.48342972
  0.35500000  -0.48342973
  0.35500000  -0.48342974
  0.35500000  -0.48342976
  0.35500000  -0.48342977
  0.35500000  -0.48342978
  0.35500000  -0.48342979
  0.35500000  -0.48342981
  0.35500000  -0.48342982
  0.35600000  -0.48403576
  0.35600000  -0.48403577
  0.35600000  -0.48403579
  0.35600000  -0.48403580
  0.35600000  -0.48403581
  0.35600000  -0.48403583
  0.35600000  -0.48403584
  0.35600000  -0.48403585
  0.35600000  -0.48403587
  0.35600000  -0.48403588
  0.35600000  -0.48403589
  0.35600000  -0.48403590
  0.35600000  -0.48403592
  0.35600000  -0.48403593
  0.35600000  -0.48403594
  0.35600000  -0.48403596
  0.35600000  -0.48403597
  0.35600000  -0.48403598
  0.35600000  -0.48403600
  0.35600000  -0.48403601
  0.35600000  -0.48403602
  0.35600000  -0.48403603
  0.35600000  -0.48403605
  0.35600000  -0.48403606
  0.35600000  -0.48403607
  0.35600000  -0.48403608
  0.35600000  -0.48403610
  0.35600000  -0.48403611
  0.35600000  -0.48403612
  0.35600000  -0.48403614
  0.35600000  -0.48403615
  0.35600000  -0.48403616
  0.35600000  -0.48403617
  0.35600000  -0.48403619
  0.35600000  -0.48403620
  0.35600000  -0.48403621
  0.35600000  -0.48403622
  0.35600000  -0.48403624
  0.35600000  -0.48403625
  0.35600000  -0.48403626
  0.35700000  -0.48464051
  0.35700000  -0.48464053
  0.35700000  -0.48464054
  0.35700000  -0.48464055
  0.35700000  -0.48464057
  0.35700000  -0.48464058
  0.35700000  -0.48464059
  0.35700000  -0.48464061
  0.35700000  -0.48464062
  0.35700000  -0.48464063
  0.35700000  -0.48464065
  0.35700000  -0.48464066
  0.35700000  -0.48464067
  0.35700000  -0.48464069
  0.35700000  -0.48464070
  0.35700000  -0.48464071
  0.35700000  -0.48464073
  0.35700000  -0.48464074
  0.35700000  -0.48464075
  0.35700000  -0.48464076
  0.35700000  -0.48464078
  0.35700000  -0.48464079
  0.35700000  -0.48464080
  0.35700000  -0.48464082
  0.35700000  -0.48464083
  0.35700000  -0.48464084
  0.35700000  -0.48464085
  0.35700000  -0.48464087
  0.35700000  -0.48464088
  0.35700000  -0.48464089
  0.35700000  -0.48464090
  0.35700000  -0.48464092
  0.35700000  -0.48464093
  0.35700000  -0.48464094
  0.35700000  -0.48464095
  0.35700000  -0.48464097
  0.35700000  -0.48464098
  0.35700000  -0.48464099
  0.35700000  -0.48464100
  0.35700000  -0.48464102
  0.35800000  -0.48524359
  0.35800000  -0.48524361
  0.35800000  -0.48524362
  0.35800000  -0.48524363
  0.35800000  -0.48524365
  0.35800000  -0.48524366
  0.35800000  -0.48524367
  0.35800000  -0.48524369
  0.35800000  -0.48524370
  0.35800000  -0.48524371
  0.35800000  -0.48524373
  0.35800000  -0.48524374
  0.35800000  -0.48524375
  0.35800000  -0.48524377
  0.35800000  -0.48524378
  0.35800000  -0.48524379
  0.35800000  -0.48524380
  0.35800000  -0.48524382
  0.35800000  -0.48524383
  0.35800000  -0.48524384
  0.35800000  -0.48524386
  0.35800000  -0.48524387
  0.35800000  -0.48524388
  0.35800000  -0.48524389
  0.35800000  -0.48524391
  0.35800000  -0.48524392
  0.35800000  -0.48524393
  0.35800000  -0.48524395
  0.35800000  -0.48524396
  0.35800000  -0.48524397
  0.35800000  -0.48524398
  0.35800000  -0.48524400
  0.35800000  -0.48524401
  0.35800000  -0.48524402
  0.35800000  -0.48524403
  0.35800000  -0.48524405
  0.35800000  -0.48524406
  0.35800000  -0.48524407
  0.35800000  -0.48524408
  0.35800000  -0.48524410
  0.35900000  -0.48584500
  0.35900000  -0.48584502
  0.35900000  -0.48584503
  0.35900000  -0.48584504
  0.35900000  -0.48584506
  0.35900000  -0.48584507
  0.35900000  -0.48584508
  0.35900000  -0.48584510
  0.35900000  -0.48584511
  0.35900000  -0.48584512
  0.35900000  -0.48584514
  0.35900000  -0.48584515
  0.35900000  -0.48584516
  0.35900000  -0.48584518
  0.35900000  -0.48584519
  0.35900000  -0.48584520
  0.35900000  -0.48584522
  0.35900000  -0.48584523
  0.35900000  -0.48584524
  0.35900000  -0.48584525
  0.35900000  -0.48584527
  0.35900000  -0.48584528
  0.35900000  -0.48584529
  0.35900000  -0.48584531
  0.35900000  -0.48584532
  0.35900000  -0.48584533
  0.35900000  -0.48584534
  0.35900000  -0.48584536
  0.35900000  -0.48584537
  0.35900000  -0.48584538
  0.35900000  -0.48584539
  0.35900000  -0.48584541
  0.35900000  -0.48584542
  0.35900000  -0.48584543
  0.35900000  -0.48584544
  0.35900000  -0.48584546
  0.35900000  -0.48584547
  0.35900000  -0.48584548
  0.35900000  -0.48584549
  0.35900000  -0.48584551
  0.36000000  -0.48644475
  0.36000000  -0.48644477
  0.36000000  -0.48644478
  0.36000000  -0.48644479
  0.36000000  -0.48644481
  0.36000000  -0.48644482
  0.36000000  -0.48644483
  0.36000000  -0.48644485
  0.36000000  -0.48644486
  0.36000000  -0.48644487
  0.36000000  -0.48644489
  0.36000000  -0.48644490
  0.36000000  -0.48644491
  0.36000000  -0.48644493
  0.36000000  -0.48644494
  0.36000000  -0.48644495
  0.36000000  -0.48644497
  0.36000000  -0.48644498
  0.36000000  -0.48644499
  0.36000000  -0.48644500
  0.36000000  -0.48644502
  0.36000000  -0.48644503
  0.36000000  -0.48644504
  0.36000000  -0.48644506
  0.36000000  -0.48644507
  0.36000000  -0.48644508
  0.36000000  -0.48644509
  0.36000000  -0.48644511
  0.36000000  -0.48644512
  0.36000000  -0.48644513
  0.36000000  -0.48644515
  0.36000000  -0.48644516
  0.36000000  -0.48644517
  0.36000000  -0.48644518
  0.36000000  -0.48644520
  0.36000000  -0.48644521
  0.36000000  -0.48644522
  0.36000000  -0.48644523
  0.36000000  -0.48644525
  0.36000000  -0.48644526
  0.36100000  -0.48704285
  0.36100000  -0.48704287
  0.36100000  -0.48704288
  0.36100000  -0.48704289
  0.36100000  -0.48704291
  0.36100000  -0.48704292
  0.36100000  -0.48704293
  0.36100000  -0.48704295
  0.36100000  -0.48704296
  0.36100000  -0.48704297
  0.36100000  -0.48704299
  0.36100000  -0.48704300
  0.36100000  -0.48704301
  0.36100000  -0.48704303
  0.36100000  -0.48704304
  0.36100000  -0.48704305
  0.36100000  -0.48704307
  0.36100000  -0.48704308
  0.36100000  -0.48704309
  0.36100000  -0.48704310
  0.36100000  -0.48704312
  0.36100000  -0.48704313
  0.36100000  -0.48704314
  0.36100000  -0.48704316
  0.36100000  -0.48704317
  0.36100000  -0.48704318
  0.36100000  -0.48704319
  0.36100000  -0.48704321
  0.36100000  -0.48704322
  0.36100000  -0.48704323
  0.36100000  -0.48704324
  0.36100000  -0.48704326
  0.36100000  -0.48704327
  0.36100000  -0.48704328
  0.36100000  -0.48704330
  0.36100000  -0.48704331
  0.36100000  -0.48704332
  0.36100000  -0.48704333
  0.36100000  -0.48704334
  0.36100000  -0.48704336
  0.36200000  -0.48763931
  0.36200000  -0.48763932
  0.36200000  -0.48763934
  0.36200000  -0.48763935
  0.36200000  -0.48763936
  0.36200000  -0.48763938
  0.36200000  -0.48763939
  0.36200000  -0.48763940
  0.36200000  -0.48763942
  0.36200000  -0.48763943
  0.36200000  -0.48763944
  0.36200000  -0.48763946
  0.36200000  -0.48763947
  0.36200000  -0.48763948
  0.36200000  -0.48763949
  0.36200000  -0.48763951
  0.36200000  -0.48763952
  0.36200000  -0.48763953
  0.36200000  -0.48763955
  0.36200000  -0.48763956
  0.36200000  -0.48763957
  0.36200000  -0.48763959
  0.36200000  -0.48763960
  0.36200000  -0.48763961
  0.36200000  -0.48763962
  0.36200000  -0.48763964
  0.36200000  -0.48763965
  0.36200000  -0.48763966
  0.36200000  -0.48763968
  0.36200000  -0.48763969
  0.36200000  -0.48763970
  0.36200000  -0.48763971
  0.36200000  -0.48763973
  0.36200000  -0.48763974
  0.36200000  -0.48763975
  0.36200000  -0.48763976
  0.36200000  -0.48763978
  0.36200000  -0.48763979
  0.36200000  -0.48763980
  0.36200000  -0.48763981
  0.36300000  -0.48823413
  0.36300000  -0.48823414
  0.36300000  -0.48823416
  0.36300000  -0.48823417
  0.36300000  -0.48823418
  0.36300000  -0.48823420
  0.36300000  -0.48823421
  0.36300000  -0.48823422
  0.36300000  -0.48823424
  0.36300000  -0.48823425
  0.36300000  -0.48823426
  0.36300000  -0.48823428
  0.36300000  -0.48823429
  0.36300000  -0.48823430
  0.36300000  -0.48823431
  0.36300000  -0.48823433
  0.36300000  -0.48823434
  0.36300000  -0.48823435
  0.36300000  -0.48823437
  0.36300000  -0.48823438
  0.36300000  -0.48823439
  0.36300000  -0.48823441
  0.36300000  -0.48823442
  0.36300000  -0.48823443
  0.36300000  -0.48823444
  0.36300000  -0.48823446
  0.36300000  -0.48823447
  0.36300000  -0.48823448
  0.36300000  -0.48823450
  0.36300000  -0.48823451
  0.36300000  -0.48823452
  0.36300000  -0.48823453
  0.36300000  -0.48823455
  0.36300000  -0.48823456
  0.36300000  -0.48823457
  0.36300000  -0.48823458
  0.36300000  -0.48823460
  0.36300000  -0.48823461
  0.36300000  -0.48823462
  0.36300000  -0.48823463
  0.36400000  -0.48882732
  0.36400000  -0.48882734
  0.36400000  -0.48882735
  0.36400000  -0.48882736
  0.36400000  -0.48882738
  0.36400000  -0.48882739
  0.36400000  -0.48882740
  0.36400000  -0.48882742
  0.36400000  -0.48882743
  0.36400000  -0.48882744
  0.36400000  -0.48882746
  0.36400000  -0.48882747
  0.36400000  -0.48882748
  0.36400000  -0.48882749
  0.36400000  -0.48882751
  0.36400000  -0.48882752
  0.36400000  -0.48882753
  0.36400000  -0.48882755
  0.36400000  -0.48882756
  0.36400000  -0.48882757
  0.36400000  -0.48882759
  0.36400000  -0.48882760
  0.36400000  -0.48882761
  0.36400000  -0.48882762
  0.36400000  -0.48882764
  0.36400000  -0.48882765
  0.36400000  -0.48882766
  0.36400000  -0.48882768
  0.36400000  -0.48882769
  0.36400000  -0.48882770
  0.36400000  -0.48882771
  0.36400000  -0.48882773
  0.36400000  -0.48882774
  0.36400000  -0.48882775
  0.36400000  -0.48882776
  0.36400000  -0.48882778
  0.36400000  -0.48882779
  0.36400000  -0.48882780
  0.36400000  -0.48882781
  0.36400000  -0.48882783
  0.36500000  -0.48941889
  0.36500000  -0.48941891
  0.36500000  -0.48941892
  0.36500000  -0.48941894
  0.36500000  -0.48941895
  0.36500000  -0.48941896
  0.36500000  -0.48941898
  0.36500000  -0.48941899
  0.36500000  -0.48941900
  0.36500000  -0.48941902
  0.36500000  -0.48941903
  0.36500000  -0.48941904
  0.36500000  -0.48941905
  0.36500000  -0.48941907
  0.36500000  -0.48941908
  0.36500000  -0.48941909
  0.36500000  -0.48941911
  0.36500000  -0.48941912
  0.36500000  -0.48941913
  0.36500000  -0.48941915
  0.36500000  -0.48941916
  0.36500000  -0.48941917
  0.36500000  -0.48941919
  0.36500000  -0.48941920
  0.36500000  -0.48941921
  0.36500000  -0.48941922
  0.36500000  -0.48941924
  0.36500000  -0.48941925
  0.36500000  -0.48941926
  0.36500000  -0.48941927
  0.36500000  -0.48941929
  0.36500000  -0.48941930
  0.36500000  -0.48941931
  0.36500000  -0.48941933
  0.36500000  -0.48941934
  0.36500000  -0.48941935
  0.36500000  -0.48941936
  0.36500000  -0.48941938
  0.36500000  -0.48941939
  0.36500000  -0.48941940
  0.36600000  -0.49000886
  0.36600000  -0.49000887
  0.36600000  -0.49000888
  0.36600000  -0.49000890
  0.36600000  -0.49000891
  0.36600000  -0.49000892
  0.36600000  -0.49000894
  0.36600000  -0.49000895
  0.36600000  -0.49000896
  0.36600000  -0.49000898
  0.36600000  -0.49000899
  0.36600000  -0.49000900
  0.36600000  -0.49000902
  0.36600000  -0.49000903
  0.36600000  -0.49000904
  0.36600000  -0.49000906
  0.36600000  -0.49000907
  0.36600000  -0.49000908
  0.36600000  -0.49000910
  0.36600000  -0.49000911
  0.36600000  -0.49000912
  0.36600000  -0.49000913
  0.36600000  -0.49000915
  0.36600000  -0.49000916
  0.36600000  -0.49000917
  0.36600000  -0.49000919
  0.36600000  -0.49000920
  0.36600000  -0.49000921
  0.36600000  -0.49000922
  0.36600000  -0.49000924
  0.36600000  -0.49000925
  0.36600000  -0.49000926
  0.36600000  -0.49000927
  0.36600000  -0.49000929
  0.36600000  -0.49000930
  0.36600000  -0.49000931
  0.36600000  -0.49000933
  0.36600000  -0.49000934
  0.36600000  -0.49000935
  0.36600000  -0.49000936
  0.36700000  -0.49059721
  0.36700000  -0.49059723
  0.36700000  -0.49059724
  0.36700000  -0.49059725
  0.36700000  -0.49059727
  0.36700000  -0.49059728
  0.36700000  -0.49059730
  0.36700000  -0.49059731
  0.36700000  -0.49059732
  0.36700000  -0.49059733
  0.36700000  -0.49059735
  0.36700000  -0.49059736
  0.36700000  -0.49059737
  0.36700000  -0.49059739
  0.36700000  -0.49059740
  0.36700000  -0.49059741
  0.36700000  -0.49059743
  0.36700000  -0.49059744
  0.36700000  -0.49059745
  0.36700000  -0.49059747
  0.36700000  -0.49059748
  0.36700000  -0.49059749
  0.36700000  -0.49059751
  0.36700000  -0.49059752
  0.36700000  -0.49059753
  0.36700000  -0.49059754
  0.36700000  -0.49059756
  0.36700000  -0.49059757
  0.36700000  -0.49059758
  0.36700000  -0.49059760
  0.36700000  -0.49059761
  0.36700000  -0.49059762
  0.36700000  -0.49059763
  0.36700000  -0.49059765
  0.36700000  -0.49059766
  0.36700000  -0.49059767
  0.36700000  -0.49059768
  0.36700000  -0.49059770
  0.36700000  -0.49059771
  0.36700000  -0.49059772
  0.36800000  -0.49118398
  0.36800000  -0.49118399
  0.36800000  -0.49118400
  0.36800000  -0.49118402
  0.36800000  -0.49118403
  0.36800000  -0.49118404
  0.36800000  -0.49118406
  0.36800000  -0.49118407
  0.36800000  -0.49118408
  0.36800000  -0.49118410
  0.36800000  -0.49118411
  0.36800000  -0.49118412
  0.36800000  -0.49118414
  0.36800000  -0.49118415
  0.36800000  -0.49118416
  0.36800000  -0.49118418
  0.36800000  -0.49118419
  0.36800000  -0.49118420
  0.36800000  -0.49118422
  0.36800000  -0.49118423
  0.36800000  -0.49118424
  0.36800000  -0.49118425
  0.36800000  -0.49118427
  0.36800000  -0.49118428
  0.36800000  -0.49118429
  0.36800000  -0.49118431
  0.36800000  -0.49118432
  0.36800000  -0.49118433
  0.36800000  -0.49118434
  0.36800000  -0.49118436
  0.36800000  -0.49118437
  0.36800000  -0.49118438
  0.36800000  -0.49118440
  0.36800000  -0.49118441
  0.36800000  -0.49118442
  0.36800000  -0.49118443
  0.36800000  -0.49118445
  0.36800000  -0.49118446
  0.36800000  -0.49118447
  0.36800000  -0.49118448
  0.36900000  -0.49176915
  0.36900000  -0.49176916
  0.36900000  -0.49176918
  0.36900000  -0.49176919
  0.36900000  -0.49176920
  0.36900000  -0.49176922
  0.36900000  -0.49176923
  0.36900000  -0.49176924
  0.36900000  -0.49176926
  0.36900000  -0.49176927
  0.36900000  -0.49176928
  0.36900000  -0.49176930
  0.36900000  -0.49176931
  0.36900000  -0.49176932
  0.36900000  -0.49176934
  0.36900000  -0.49176935
  0.36900000  -0.49176936
  0.36900000  -0.49176938
  0.36900000  -0.49176939
  0.36900000  -0.49176940
  0.36900000  -0.49176942
  0.36900000  -0.49176943
  0.36900000  -0.49176944
  0.36900000  -0.49176945
  0.36900000  -0.49176947
  0.36900000  -0.49176948
  0.36900000  -0.49176949
  0.36900000  -0.49176951
  0.36900000  -0.49176952
  0.36900000  -0.49176953
  0.36900000  -0.49176954
  0.36900000  -0.49176956
  0.36900000  -0.49176957
  0.36900000  -0.49176958
  0.36900000  -0.49176960
  0.36900000  -0.49176961
  0.36900000  -0.49176962
  0.36900000  -0.49176963
  0.36900000  -0.49176965
  0.36900000  -0.49176966
  0.37000000  -0.49235274
  0.37000000  -0.49235276
  0.37000000  -0.49235277
  0.37000000  -0.49235278
  0.37000000  -0.49235280
  0.37000000  -0.49235281
  0.37000000  -0.49235282
  0.37000000  -0.49235284
  0.37000000  -0.49235285
  0.37000000  -0.49235286
  0.37000000  -0.49235288
  0.37000000  -0.49235289
  0.37000000  -0.49235290
  0.37000000  -0.49235292
  0.37000000  -0.49235293
  0.37000000  -0.49235294
  0.37000000  -0.49235296
  0.37000000  -0.49235297
  0.37000000  -0.49235298
  0.37000000  -0.49235300
  0.37000000  -0.49235301
  0.37000000  -0.49235302
  0.37000000  -0.49235304
  0.37000000  -0.49235305
  0.37000000  -0.49235306
  0.37000000  -0.49235307
  0.37000000  -0.49235309
  0.37000000  -0.49235310
  0.37000000  -0.49235311
  0.37000000  -0.49235313
  0.37000000  -0.49235314
  0.37000000  -0.49235315
  0.37000000  -0.49235316
  0.37000000  -0.49235318
  0.37000000  -0.49235319
  0.37000000  -0.49235320
  0.37000000  -0.49235321
  0.37000000  -0.49235323
  0.37000000  -0.49235324
  0.37000000  -0.49235325
  0.37100000  -0.49293476
  0.37100000  -0.49293478
  0.37100000  -0.49293479
  0.37100000  -0.49293481
  0.37100000  -0.49293482
  0.37100000  -0.49293483
  0.37100000  -0.49293485
  0.37100000  -0.49293486
  0.37100000  -0.49293487
  0.37100000  -0.49293489
  0.37100000  -0.49293490
  0.37100000  -0.49293491
  0.37100000  -0.49293493
  0.37100000  -0.49293494
  0.37100000  -0.49293495
  0.37100000  -0.49293497
  0.37100000  -0.49293498
  0.37100000  -0.49293499
  0.37100000  -0.49293500
  0.37100000  -0.49293502
  0.37100000  -0.49293503
  0.37100000  -0.49293504
  0.37100000  -0.49293506
  0.37100000  -0.49293507
  0.37100000  -0.49293508
  0.37100000  -0.49293510
  0.37100000  -0.49293511
  0.37100000  -0.49293512
  0.37100000  -0.49293513
  0.37100000  -0.49293515
  0.37100000  -0.49293516
  0.37100000  -0.49293517
  0.37100000  -0.49293519
  0.37100000  -0.49293520
  0.37100000  -0.49293521
  0.37100000  -0.49293522
  0.37100000  -0.49293524
  0.37100000  -0.49293525
  0.37100000  -0.49293526
  0.37100000  -0.49293527
  0.37200000  -0.49351522
  0.37200000  -0.49351523
  0.37200000  -0.49351525
  0.37200000  -0.49351526
  0.37200000  -0.49351527
  0.37200000  -0.49351529
  0.37200000  -0.49351530
  0.37200000  -0.49351531
  0.37200000  -0.49351533
  0.37200000  -0.49351534
  0.37200000  -0.49351535
  0.37200000  -0.49351537
  0.37200000  -0.49351538
  0.37200000  -0.49351539
  0.37200000  -0.49351541
  0.37200000  -0.49351542
  0.37200000  -0.49351543
  0.37200000  -0.49351545
  0.37200000  -0.49351546
  0.37200000  -0.49351547
  0.37200000  -0.49351549
  0.37200000  -0.49351550
  0.37200000  -0.49351551
  0.37200000  -0.49351553
  0.37200000  -0.49351554
  0.37200000  -0.49351555
  0.37200000  -0.49351556
  0.37200000  -0.49351558
  0.37200000  -0.49351559
  0.37200000  -0.49351560
  0.37200000  -0.49351562
  0.37200000  -0.49351563
  0.37200000  -0.49351564
  0.37200000  -0.49351565
  0.37200000  -0.49351567
  0.37200000  -0.49351568
  0.37200000  -0.49351569
  0.37200000  -0.49351570
  0.37200000  -0.49351572
  0.37200000  -0.49351573
  0.37300000  -0.49409412
  0.37300000  -0.49409413
  0.37300000  -0.49409414
  0.37300000  -0.49409416
  0.37300000  -0.49409417
  0.37300000  -0.49409419
  0.37300000  -0.49409420
  0.37300000  -0.49409421
  0.37300000  -0.49409423
  0.37300000  -0.49409424
  0.37300000  -0.49409425
  0.37300000  -0.49409427
  0.37300000  -0.49409428
  0.37300000  -0.49409429
  0.37300000  -0.49409431
  0.37300000  -0.49409432
  0.37300000  -0.49409433
  0.37300000  -0.49409435
  0.37300000  -0.49409436
  0.37300000  -0.49409437
  0.37300000  -0.49409438
  0.37300000  -0.49409440
  0.37300000  -0.49409441
  0.37300000  -0.49409442
  0.37300000  -0.49409444
  0.37300000  -0.49409445
  0.37300000  -0.49409446
  0.37300000  -0.49409448
  0.37300000  -0.49409449
  0.37300000  -0.49409450
  0.37300000  -0.49409451
  0.37300000  -0.49409453
  0.37300000  -0.49409454
  0.37300000  -0.49409455
  0.37300000  -0.49409456
  0.37300000  -0.49409458
  0.37300000  -0.49409459
  0.37300000  -0.49409460
  0.37300000  -0.49409462
  0.37300000  -0.49409463
  0.37400000  -0.49467147
  0.37400000  -0.49467148
  0.37400000  -0.49467149
  0.37400000  -0.49467151
  0.37400000  -0.49467152
  0.37400000  -0.49467153
  0.37400000  -0.49467155
  0.37400000  -0.49467156
  0.37400000  -0.49467157
  0.37400000  -0.49467159
  0.37400000  -0.49467160
  0.37400000  -0.49467161
  0.37400000  -0.49467163
  0.37400000  -0.49467164
  0.37400000  -0.49467165
  0.37400000  -0.49467167
  0.37400000  -0.49467168
  0.37400000  -0.49467169
  0.37400000  -0.49467171
  0.37400000  -0.49467172
  0.37400000  -0.49467173
  0.37400000  -0.49467175
  0.37400000  -0.49467176
  0.37400000  -0.49467177
  0.37400000  -0.49467178
  0.37400000  -0.49467180
  0.37400000  -0.49467181
  0.37400000  -0.49467182
  0.37400000  -0.49467184
  0.37400000  -0.49467185
  0.37400000  -0.49467186
  0.37400000  -0.49467187
  0.37400000  -0.49467189
  0.37400000  -0.49467190
  0.37400000  -0.49467191
  0.37400000  -0.49467193
  0.37400000  -0.49467194
  0.37400000  -0.49467195
  0.37400000  -0.49467196
  0.37400000  -0.49467198
  0.37500000  -0.49524727
  0.37500000  -0.49524728
  0.37500000  -0.49524730
  0.37500000  -0.49524731
  0.37500000  -0.49524732
  0.37500000  -0.49524734
  0.37500000  -0.49524735
  0.37500000  -0.49524736
  0.37500000  -0.49524738
  0.37500000  -0.49524739
  0.37500000  -0.49524740
  0.37500000  -0.49524742
  0.37500000  -0.49524743
  0.37500000  -0.49524744
  0.37500000  -0.49524746
  0.37500000  -0.49524747
  0.37500000  -0.49524748
  0.37500000  -0.49524750
  0.37500000  -0.49524751
  0.37500000  -0.49524752
  0.37500000  -0.49524754
  0.37500000  -0.49524755
  0.37500000  -0.49524756
  0.37500000  -0.49524758
  0.37500000  -0.49524759
  0.37500000  -0.49524760
  0.37500000  -0.49524761
  0.37500000  -0.49524763
  0.37500000  -0.49524764
  0.37500000  -0.49524765
  0.37500000  -0.49524767
  0.37500000  -0.49524768
  0.37500000  -0.49524769
  0.37500000  -0.49524770
  0.37500000  -0.49524772
  0.37500000  -0.49524773
  0.37500000  -0.49524774
  0.37500000  -0.49524776
  0.37500000  -0.49524777
  0.37500000  -0.49524778
  0.37600000  -0.49582154
  0.37600000  -0.49582155
  0.37600000  -0.49582157
  0.37600000  -0.49582158
  0.37600000  -0.49582159
  0.37600000  -0.49582161
  0.37600000  -0.49582162
  0.37600000  -0.49582163
  0.37600000  -0.49582165
  0.37600000  -0.49582166
  0.37600000  -0.49582167
  0.37600000  -0.49582169
  0.37600000  -0.49582170
  0.37600000  -0.49582171
  0.37600000  -0.49582173
  0.37600000  -0.49582174
  0.37600000  -0.49582175
  0.37600000  -0.49582177
  0.37600000  -0.49582178
  0.37600000  -0.49582179
  0.37600000  -0.49582181
  0.37600000  -0.49582182
  0.37600000  -0.49582183
  0.37600000  -0.49582185
  0.37600000  -0.49582186
  0.37600000  -0.49582187
  0.37600000  -0.49582188
  0.37600000  -0.49582190
  0.37600000  -0.49582191
  0.37600000  -0.49582192
  0.37600000  -0.49582194
  0.37600000  -0.49582195
  0.37600000  -0.49582196
  0.37600000  -0.49582197
  0.37600000  -0.49582199
  0.37600000  -0.49582200
  0.37600000  -0.49582201
  0.37600000  -0.49582202
  0.37600000  -0.49582204
  0.37600000  -0.49582205
  0.37700000  -0.49639428
  0.37700000  -0.49639429
  0.37700000  -0.49639431
  0.37700000  -0.49639432
  0.37700000  -0.49639433
  0.37700000  -0.49639435
  0.37700000  -0.49639436
  0.37700000  -0.49639437
  0.37700000  -0.49639439
  0.37700000  -0.49639440
  0.37700000  -0.49639441
  0.37700000  -0.49639443
  0.37700000  -0.49639444
  0.37700000  -0.49639445
  0.37700000  -0.49639447
  0.37700000  -0.49639448
  0.37700000  -0.49639449
  0.37700000  -0.49639451
  0.37700000  -0.49639452
  0.37700000  -0.49639453
  0.37700000  -0.49639455
  0.37700000  -0.49639456
  0.37700000  -0.49639457
  0.37700000  -0.49639459
  0.37700000  -0.49639460
  0.37700000  -0.49639461
  0.37700000  -0.49639463
  0.37700000  -0.49639464
  0.37700000  -0.49639465
  0.37700000  -0.49639466
  0.37700000  -0.49639468
  0.37700000  -0.49639469
  0.37700000  -0.49639470
  0.37700000  -0.49639472
  0.37700000  -0.49639473
  0.37700000  -0.49639474
  0.37700000  -0.49639475
  0.37700000  -0.49639477
  0.37700000  -0.49639478
  0.37700000  -0.49639479
  0.37800000  -0.49696550
  0.37800000  -0.49696551
  0.37800000  -0.49696553
  0.37800000  -0.49696554
  0.37800000  -0.49696555
  0.37800000  -0.49696557
  0.37800000  -0.49696558
  0.37800000  -0.49696559
  0.37800000  -0.49696561
  0.37800000  -0.49696562
  0.37800000  -0.49696563
  0.37800000  -0.49696565
  0.37800000  -0.49696566
  0.37800000  -0.49696567
  0.37800000  -0.49696569
  0.37800000  -0.49696570
  0.37800000  -0.49696571
  0.37800000  -0.49696573
  0.37800000  -0.49696574
  0.37800000  -0.49696575
  0.37800000  -0.49696577
  0.37800000  -0.49696578
  0.37800000  -0.49696579
  0.37800000  -0.49696581
  0.37800000  -0.49696582
  0.37800000  -0.49696583
  0.37800000  -0.49696584
  0.37800000  -0.49696586
  0.37800000  -0.49696587
  0.37800000  -0.49696588
  0.37800000  -0.49696590
  0.37800000  -0.49696591
  0.37800000  -0.49696592
  0.37800000  -0.49696594
  0.37800000  -0.49696595
  0.37800000  -0.49696596
  0.37800000  -0.49696597
  0.37800000  -0.49696599
  0.37800000  -0.49696600
  0.37800000  -0.49696601
  0.37900000  -0.49753520
  0.37900000  -0.49753522
  0.37900000  -0.49753523
  0.37900000  -0.49753525
  0.37900000  -0.49753526
  0.37900000  -0.49753527
  0.37900000  -0.49753529
  0.37900000  -0.49753530
  0.37900000  -0.49753531
  0.37900000  -0.49753533
  0.37900000  -0.49753534
  0.37900000  -0.49753535
  0.37900000  -0.49753537
  0.37900000  -0.49753538
  0.37900000  -0.49753539
  0.37900000  -0.49753541
  0.37900000  -0.49753542
  0.37900000  -0.49753543
  0.37900000  -0.49753545
  0.37900000  -0.49753546
  0.37900000  -0.49753547
  0.37900000  -0.49753549
  0.37900000  -0.49753550
  0.37900000  -0.49753551
  0.37900000  -0.49753552
  0.37900000  -0.49753554
  0.37900000  -0.49753555
  0.37900000  -0.49753556
  0.37900000  -0.49753558
  0.37900000  -0.49753559
  0.37900000  -0.49753560
  0.37900000  -0.49753562
  0.37900000  -0.49753563
  0.37900000  -0.49753564
  0.37900000  -0.49753565
  0.37900000  -0.49753567
  0.37900000  -0.49753568
  0.37900000  -0.49753569
  0.37900000  -0.49753570
  0.37900000  -0.49753572
  0.38000000  -0.49810340
  0.38000000  -0.49810342
  0.38000000  -0.49810343
  0.38000000  -0.49810344
  0.38000000  -0.49810346
  0.38000000  -0.49810347
  0.38000000  -0.49810348
  0.38000000  -0.49810350
  0.38000000  -0.49810351
  0.38000000  -0.49810353
  0.38000000  -0.49810354
  0.38000000  -0.49810355
  0.38000000  -0.49810357
  0.38000000  -0.49810358
  0.38000000  -0.49810359
  0.38000000  -0.49810361
  0.38000000  -0.49810362
  0.38000000  -0.49810363
  0.38000000  -0.49810365
  0.38000000  -0.49810366
  0.38000000  -0.49810367
  0.38000000  -0.49810368
  0.38000000  -0.49810370
  0.38000000  -0.49810371
  0.38000000  -0.49810372
  0.38000000  -0.49810374
  0.38000000  -0.49810375
  0.38000000  -0.49810376
  0.38000000  -0.49810378
  0.38000000  -0.49810379
  0.38000000  -0.49810380
  0.38000000  -0.49810381
  0.38000000  -0.49810383
  0.38000000  -0.49810384
  0.38000000  -0.49810385
  0.38000000  -0.49810387
  0.38000000  -0.49810388
  0.38000000  -0.49810389
  0.38000000  -0.49810390
  0.38000000  -0.49810392
  0.38100000  -0.49867010
  0.38100000  -0.49867012
  0.38100000  -0.49867013
  0.38100000  -0.49867014
  0.38100000  -0.49867016
  0.38100000  -0.49867017
  0.38100000  -0.49867018
  0.38100000  -0.49867020
  0.38100000  -0.49867021
  0.38100000  -0.49867022
  0.38100000  -0.49867024
  0.38100000  -0.49867025
  0.38100000  -0.49867027
  0.38100000  -0.49867028
  0.38100000  -0.49867029
  0.38100000  -0.49867031
  0.38100000  -0.49867032
  0.38100000  -0.49867033
  0.38100000  -0.49867034
  0.38100000  -0.49867036
  0.38100000  -0.49867037
  0.38100000  -0.49867038
  0.38100000  -0.49867040
  0.38100000  -0.49867041
  0.38100000  -0.49867042
  0.38100000  -0.49867044
  0.38100000  -0.49867045
  0.38100000  -0.49867046
  0.38100000  -0.49867048
  0.38100000  -0.49867049
  0.38100000  -0.49867050
  0.38100000  -0.49867051
  0.38100000  -0.49867053
  0.38100000  -0.49867054
  0.38100000  -0.49867055
  0.38100000  -0.49867057
  0.38100000  -0.49867058
  0.38100000  -0.49867059
  0.38100000  -0.49867060
  0.38100000  -0.49867062
  0.38200000  -0.49923531
  0.38200000  -0.49923532
  0.38200000  -0.49923534
  0.38200000  -0.49923535
  0.38200000  -0.49923536
  0.38200000  -0.49923538
  0.38200000  -0.49923539
  0.38200000  -0.49923540
  0.38200000  -0.49923542
  0.38200000  -0.49923543
  0.38200000  -0.49923544
  0.38200000  -0.49923546
  0.38200000  -0.49923547
  0.38200000  -0.49923549
  0.38200000  -0.49923550
  0.38200000  -0.49923551
  0.38200000  -0.49923553
  0.38200000  -0.49923554
  0.38200000  -0.49923555
  0.38200000  -0.49923556
  0.38200000  -0.49923558
  0.38200000  -0.49923559
  0.38200000  -0.49923560
  0.38200000  -0.49923562
  0.38200000  -0.49923563
  0.38200000  -0.49923564
  0.38200000  -0.49923566
  0.38200000  -0.49923567
  0.38200000  -0.49923568
  0.38200000  -0.49923570
  0.38200000  -0.49923571
  0.38200000  -0.49923572
  0.38200000  -0.49923573
  0.38200000  -0.49923575
  0.38200000  -0.49923576
  0.38200000  -0.49923577
  0.38200000  -0.49923579
  0.38200000  -0.49923580
  0.38200000  -0.49923581
  0.38200000  -0.49923582
  0.38300000  -0.49979903
  0.38300000  -0.49979904
  0.38300000  -0.49979906
  0.38300000  -0.49979907
  0.38300000  -0.49979908
  0.38300000  -0.49979910
  0.38300000  -0.49979911
  0.38300000  -0.49979913
  0.38300000  -0.49979914
  0.38300000  -0.49979915
  0.38300000  -0.49979917
  0.38300000  -0.49979918
  0.38300000  -0.49979919
  0.38300000  -0.49979921
  0.38300000  -0.49979922
  0.38300000  -0.49979923
  0.38300000  -0.49979925
  0.38300000  -0.49979926
  0.38300000  -0.49979927
  0.38300000  -0.49979929
  0.38300000  -0.49979930
  0.38300000  -0.49979931
  0.38300000  -0.49979933
  0.38300000  -0.49979934
  0.38300000  -0.49979935
  0.38300000  -0.49979936
  0.38300000  -0.49979938
  0.38300000  -0.49979939
  0.38300000  -0.49979940
  0.38300000  -0.49979942
  0.38300000  -0.49979943
  0.38300000  -0.49979944
  0.38300000  -0.49979946
  0.38300000  -0.49979947
  0.38300000  -0.49979948
  0.38300000  -0.49979949
  0.38300000  -0.49979951
  0.38300000  -0.49979952
  0.38300000  -0.49979953
  0.38300000  -0.49979955
  0.38400000  -0.50036127
  0.38400000  -0.50036129
  0.38400000  -0.50036130
  0.38400000  -0.50036131
  0.38400000  -0.50036133
  0.38400000  -0.50036134
  0.38400000  -0.50036135
  0.38400000  -0.50036137
  0.38400000  -0.50036138
  0.38400000  -0.50036139
  0.38400000  -0.50036141
  0.38400000  -0.50036142
  0.38400000  -0.50036144
  0.38400000  -0.50036145
  0.38400000  -0.50036146
  0.38400000  -0.50036148
  0.38400000  -0.50036149
  0.38400000  -0.50036150
  0.38400000  -0.50036152
  0.38400000  -0.50036153
  0.38400000  -0.50036154
  0.38400000  -0.50036155
  0.38400000  -0.50036157
  0.38400000  -0.50036158
  0.38400000  -0.50036159
  0.38400000  -0.50036161
  0.38400000  -0.50036162
  0.38400000  -0.50036163
  0.38400000  -0.50036165
  0.38400000  -0.50036166
  0.38400000  -0.50036167
  0.38400000  -0.50036169
  0.38400000  -0.50036170
  0.38400000  -0.50036171
  0.38400000  -0.50036172
  0.38400000  -0.50036174
  0.38400000  -0.50036175
  0.38400000  -0.50036176
  0.38400000  -0.50036177
  0.38400000  -0.50036179
  0.38500000  -0.50092204
  0.38500000  -0.50092206
  0.38500000  -0.50092207
  0.38500000  -0.50092208
  0.38500000  -0.50092210
  0.38500000  -0.50092211
  0.38500000  -0.50092212
  0.38500000  -0.50092214
  0.38500000  -0.50092215
  0.38500000  -0.50092217
  0.38500000  -0.50092218
  0.38500000  -0.50092219
  0.38500000  -0.50092221
  0.38500000  -0.50092222
  0.38500000  -0.50092223
  0.38500000  -0.50092225
  0.38500000  -0.50092226
  0.38500000  -0.50092227
  0.38500000  -0.50092229
  0.38500000  -0.50092230
  0.38500000  -0.50092231
  0.38500000  -0.50092233
  0.38500000  -0.50092234
  0.38500000  -0.50092235
  0.38500000  -0.50092236
  0.38500000  -0.50092238
  0.38500000  -0.50092239
  0.38500000  -0.50092240
  0.38500000  -0.50092242
  0.38500000  -0.50092243
  0.38500000  -0.50092244
  0.38500000  -0.50092246
  0.38500000  -0.50092247
  0.38500000  -0.50092248
  0.38500000  -0.50092249
  0.38500000  -0.50092251
  0.38500000  -0.50092252
  0.38500000  -0.50092253
  0.38500000  -0.50092255
  0.38500000  -0.50092256
  0.38600000  -0.50148135
  0.38600000  -0.50148136
  0.38600000  -0.50148138
  0.38600000  -0.50148139
  0.38600000  -0.50148140
  0.38600000  -0.50148142
  0.38600000  -0.50148143
  0.38600000  -0.50148144
  0.38600000  -0.50148146
  0.38600000  -0.50148147
  0.38600000  -0.50148148
  0.38600000  -0.50148150
  0.38600000  -0.50148151
  0.38600000  -0.50148152
  0.38600000  -0.50148154
  0.38600000  -0.50148155
  0.38600000  -0.50148156
  0.38600000  -0.50148158
  0.38600000  -0.50148159
  0.38600000  -0.50148160
  0.38600000  -0.50148162
  0.38600000  -0.50148163
  0.38600000  -0.50148164
  0.38600000  -0.50148166
  0.38600000  -0.50148167
  0.38600000  -0.50148168
  0.38600000  -0.50148170
  0.38600000  -0.50148171
  0.38600000  -0.50148172
  0.38600000  -0.50148174
  0.38600000  -0.50148175
  0.38600000  -0.50148176
  0.38600000  -0.50148177
  0.38600000  -0.50148179
  0.38600000  -0.50148180
  0.38600000  -0.50148181
  0.38600000  -0.50148183
  0.38600000  -0.50148184
  0.38600000  -0.50148185
  0.38600000  -0.50148186
  0.38700000  -0.50203919
  0.38700000  -0.50203921
  0.38700000  -0.50203922
  0.38700000  -0.50203924
  0.38700000  -0.50203925
  0.38700000  -0.50203926
  0.38700000  -0.50203928
  0.38700000  -0.50203929
  0.38700000  -0.50203930
  0.38700000  -0.50203932
  0.38700000  -0.50203933
  0.38700000  -0.50203934
  0.38700000  -0.50203936
  0.38700000  -0.50203937
  0.38700000  -0.50203938
  0.38700000  -0.50203940
  0.38700000  -0.50203941
  0.38700000  -0.50203943
  0.38700000  -0.50203944
  0.38700000  -0.50203945
  0.38700000  -0.50203946
  0.38700000  -0.50203948
  0.38700000  -0.50203949
  0.38700000  -0.50203950
  0.38700000  -0.50203952
  0.38700000  -0.50203953
  0.38700000  -0.50203954
  0.38700000  -0.50203956
  0.38700000  -0.50203957
  0.38700000  -0.50203958
  0.38700000  -0.50203960
  0.38700000  -0.50203961
  0.38700000  -0.50203962
  0.38700000  -0.50203963
  0.38700000  -0.50203965
  0.38700000  -0.50203966
  0.38700000  -0.50203967
  0.38700000  -0.50203969
  0.38700000  -0.50203970
  0.38700000  -0.50203971
  0.38800000  -0.50259559
  0.38800000  -0.50259560
  0.38800000  -0.50259562
  0.38800000  -0.50259563
  0.38800000  -0.50259565
  0.38800000  -0.50259566
  0.38800000  -0.50259567
  0.38800000  -0.50259569
  0.38800000  -0.50259570
  0.38800000  -0.50259571
  0.38800000  -0.50259573
  0.38800000  -0.50259574
  0.38800000  -0.50259575
  0.38800000  -0.50259577
  0.38800000  -0.50259578
  0.38800000  -0.50259579
  0.38800000  -0.50259581
  0.38800000  -0.50259582
  0.38800000  -0.50259583
  0.38800000  -0.50259585
  0.38800000  -0.50259586
  0.38800000  -0.50259587
  0.38800000  -0.50259589
  0.38800000  -0.50259590
  0.38800000  -0.50259591
  0.38800000  -0.50259593
  0.38800000  -0.50259594
  0.38800000  -0.50259595
  0.38800000  -0.50259597
  0.38800000  -0.50259598
  0.38800000  -0.50259599
  0.38800000  -0.50259600
  0.38800000  -0.50259602
  0.38800000  -0.50259603
  0.38800000  -0.50259604
  0.38800000  -0.50259606
  0.38800000  -0.50259607
  0.38800000  -0.50259608
  0.38800000  -0.50259609
  0.38800000  -0.50259611
  0.38900000  -0.50315054
  0.38900000  -0.50315055
  0.38900000  -0.50315057
  0.38900000  -0.50315058
  0.38900000  -0.50315060
  0.38900000  -0.50315061
  0.38900000  -0.50315062
  0.38900000  -0.50315064
  0.38900000  -0.50315065
  0.38900000  -0.50315066
  0.38900000  -0.50315068
  0.38900000  -0.50315069
  0.38900000  -0.50315070
  0.38900000  -0.50315072
  0.38900000  -0.50315073
  0.38900000  -0.50315074
  0.38900000  -0.50315076
  0.38900000  -0.50315077
  0.38900000  -0.50315078
  0.38900000  -0.50315080
  0.38900000  -0.50315081
  0.38900000  -0.50315082
  0.38900000  -0.50315084
  0.38900000  -0.50315085
  0.38900000  -0.50315086
  0.38900000  -0.50315088
  0.38900000  -0.50315089
  0.38900000  -0.50315090
  0.38900000  -0.50315092
  0.38900000  -0.50315093
  0.38900000  -0.50315094
  0.38900000  -0.50315096
  0.38900000  -0.50315097
  0.38900000  -0.50315098
  0.38900000  -0.50315099
  0.38900000  -0.50315101
  0.38900000  -0.50315102
  0.38900000  -0.50315103
  0.38900000  -0.50315105
  0.38900000  -0.50315106
  0.39000000  -0.50370405
  0.39000000  -0.50370407
  0.39000000  -0.50370408
  0.39000000  -0.50370409
  0.39000000  -0.50370411
  0.39000000  -0.50370412
  0.39000000  -0.50370414
  0.39000000  -0.50370415
  0.39000000  -0.50370416
  0.39000000  -0.50370418
  0.39000000  -0.50370419
  0.39000000  -0.50370420
  0.39000000  -0.50370422
  0.39000000  -0.50370423
  0.39000000  -0.50370424
  0.39000000  -0.50370426
  0.39000000  -0.50370427
  0.39000000  -0.50370428
  0.39000000  -0.50370430
  0.39000000  -0.50370431
  0.39000000  -0.50370432
  0.39000000  -0.50370434
  0.39000000  -0.50370435
  0.39000000  -0.50370436
  0.39000000  -0.50370438
  0.39000000  -0.50370439
  0.39000000  -0.50370440
  0.39000000  -0.50370442
  0.39000000  -0.50370443
  0.39000000  -0.50370444
  0.39000000  -0.50370446
  0.39000000  -0.50370447
  0.39000000  -0.50370448
  0.39000000  -0.50370449
  0.39000000  -0.50370451
  0.39000000  -0.50370452
  0.39000000  -0.50370453
  0.39000000  -0.50370455
  0.39000000  -0.50370456
  0.39000000  -0.50370457
  0.39100000  -0.50425613
  0.39100000  -0.50425615
  0.39100000  -0.50425616
  0.39100000  -0.50425617
  0.39100000  -0.50425619
  0.39100000  -0.50425620
  0.39100000  -0.50425622
  0.39100000  -0.50425623
  0.39100000  -0.50425624
  0.39100000  -0.50425626
  0.39100000  -0.50425627
  0.39100000  -0.50425628
  0.39100000  -0.50425630
  0.39100000  -0.50425631
  0.39100000  -0.50425632
  0.39100000  -0.50425634
  0.39100000  -0.50425635
  0.39100000  -0.50425636
  0.39100000  -0.50425638
  0.39100000  -0.50425639
  0.39100000  -0.50425640
  0.39100000  -0.50425642
  0.39100000  -0.50425643
  0.39100000  -0.50425644
  0.39100000  -0.50425646
  0.39100000  -0.50425647
  0.39100000  -0.50425648
  0.39100000  -0.50425650
  0.39100000  -0.50425651
  0.39100000  -0.50425652
  0.39100000  -0.50425654
  0.39100000  -0.50425655
  0.39100000  -0.50425656
  0.39100000  -0.50425657
  0.39100000  -0.50425659
  0.39100000  -0.50425660
  0.39100000  -0.50425661
  0.39100000  -0.50425663
  0.39100000  -0.50425664
  0.39100000  -0.50425665
  0.39200000  -0.50480679
  0.39200000  -0.50480680
  0.39200000  -0.50480682
  0.39200000  -0.50480683
  0.39200000  -0.50480684
  0.39200000  -0.50480686
  0.39200000  -0.50480687
  0.39200000  -0.50480689
  0.39200000  -0.50480690
  0.39200000  -0.50480691
  0.39200000  -0.50480693
  0.39200000  -0.50480694
  0.39200000  -0.50480695
  0.39200000  -0.50480697
  0.39200000  -0.50480698
  0.39200000  -0.50480699
  0.39200000  -0.50480701
  0.39200000  -0.50480702
  0.39200000  -0.50480703
  0.39200000  -0.50480705
  0.39200000  -0.50480706
  0.39200000  -0.50480707
  0.39200000  -0.50480709
  0.39200000  -0.50480710
  0.39200000  -0.50480711
  0.39200000  -0.50480713
  0.39200000  -0.50480714
  0.39200000  -0.50480715
  0.39200000  -0.50480717
  0.39200000  -0.50480718
  0.39200000  -0.50480719
  0.39200000  -0.50480720
  0.39200000  -0.50480722
  0.39200000  -0.50480723
  0.39200000  -0.50480724
  0.39200000  -0.50480726
  0.39200000  -0.50480727
  0.39200000  -0.50480728
  0.39200000  -0.50480730
  0.39200000  -0.50480731
  0.39300000  -0.50535603
  0.39300000  -0.50535604
  0.39300000  -0.50535605
  0.39300000  -0.50535607
  0.39300000  -0.50535608
  0.39300000  -0.50535609
  0.39300000  -0.50535611
  0.39300000  -0.50535612
  0.39300000  -0.50535614
  0.39300000  -0.50535615
  0.39300000  -0.50535616
  0.39300000  -0.50535618
  0.39300000  -0.50535619
  0.39300000  -0.50535620
  0.39300000  -0.50535622
  0.39300000  -0.50535623
  0.39300000  -0.50535624
  0.39300000  -0.50535626
  0.39300000  -0.50535627
  0.39300000  -0.50535628
  0.39300000  -0.50535630
  0.39300000  -0.50535631
  0.39300000  -0.50535632
  0.39300000  -0.50535634
  0.39300000  -0.50535635
  0.39300000  -0.50535636
  0.39300000  -0.50535638
  0.39300000  -0.50535639
  0.39300000  -0.50535640
  0.39300000  -0.50535642
  0.39300000  -0.50535643
  0.39300000  -0.50535644
  0.39300000  -0.50535646
  0.39300000  -0.50535647
  0.39300000  -0.50535648
  0.39300000  -0.50535649
  0.39300000  -0.50535651
  0.39300000  -0.50535652
  0.39300000  -0.50535653
  0.39300000  -0.50535655
  0.39400000  -0.50590385
  0.39400000  -0.50590386
  0.39400000  -0.50590388
  0.39400000  -0.50590389
  0.39400000  -0.50590391
  0.39400000  -0.50590392
  0.39400000  -0.50590393
  0.39400000  -0.50590395
  0.39400000  -0.50590396
  0.39400000  -0.50590397
  0.39400000  -0.50590399
  0.39400000  -0.50590400
  0.39400000  -0.50590401
  0.39400000  -0.50590403
  0.39400000  -0.50590404
  0.39400000  -0.50590406
  0.39400000  -0.50590407
  0.39400000  -0.50590408
  0.39400000  -0.50590410
  0.39400000  -0.50590411
  0.39400000  -0.50590412
  0.39400000  -0.50590414
  0.39400000  -0.50590415
  0.39400000  -0.50590416
  0.39400000  -0.50590418
  0.39400000  -0.50590419
  0.39400000  -0.50590420
  0.39400000  -0.50590421
  0.39400000  -0.50590423
  0.39400000  -0.50590424
  0.39400000  -0.50590425
  0.39400000  -0.50590427
  0.39400000  -0.50590428
  0.39400000  -0.50590429
  0.39400000  -0.50590431
  0.39400000  -0.50590432
  0.39400000  -0.50590433
  0.39400000  -0.50590434
  0.39400000  -0.50590436
  0.39400000  -0.50590437
  0.39500000  -0.50645027
  0.39500000  -0.50645028
  0.39500000  -0.50645030
  0.39500000  -0.50645031
  0.39500000  -0.50645032
  0.39500000  -0.50645034
  0.39500000  -0.50645035
  0.39500000  -0.50645037
  0.39500000  -0.50645038
  0.39500000  -0.50645039
  0.39500000  -0.50645041
  0.39500000  -0.50645042
  0.39500000  -0.50645043
  0.39500000  -0.50645045
  0.39500000  -0.50645046
  0.39500000  -0.50645047
  0.39500000  -0.50645049
  0.39500000  -0.50645050
  0.39500000  -0.50645051
  0.39500000  -0.50645053
  0.39500000  -0.50645054
  0.39500000  -0.50645055
  0.39500000  -0.50645057
  0.39500000  -0.50645058
  0.39500000  -0.50645059
  0.39500000  -0.50645061
  0.39500000  -0.50645062
  0.39500000  -0.50645063
  0.39500000  -0.50645065
  0.39500000  -0.50645066
  0.39500000  -0.50645067
  0.39500000  -0.50645069
  0.39500000  -0.50645070
  0.39500000  -0.50645071
  0.39500000  -0.50645073
  0.39500000  -0.50645074
  0.39500000  -0.50645075
  0.39500000  -0.50645076
  0.39500000  -0.50645078
  0.39500000  -0.50645079
  0.39600000  -0.50699529
  0.39600000  -0.50699530
  0.39600000  -0.50699532
  0.39600000  -0.50699533
  0.39600000  -0.50699534
  0.39600000  -0.50699536
  0.39600000  -0.50699537
  0.39600000  -0.50699539
  0.39600000  -0.50699540
  0.39600000  -0.50699541
  0.39600000  -0.50699543
  0.39600000  -0.50699544
  0.39600000  -0.50699545
  0.39600000  -0.50699547
  0.39600000  -0.50699548
  0.39600000  -0.50699549
  0.39600000  -0.50699551
  0.39600000  -0.50699552
  0.39600000  -0.50699553
  0.39600000  -0.50699555
  0.39600000  -0.50699556
  0.39600000  -0.50699557
  0.39600000  -0.50699559
  0.39600000  -0.50699560
  0.39600000  -0.50699561
  0.39600000  -0.50699563
  0.39600000  -0.50699564
  0.39600000  -0.50699565
  0.39600000  -0.50699567
  0.39600000  -0.50699568
  0.39600000  -0.50699569
  0.39600000  -0.50699571
  0.39600000  -0.50699572
  0.39600000  -0.50699573
  0.39600000  -0.50699575
  0.39600000  -0.50699576
  0.39600000  -0.50699577
  0.39600000  -0.50699578
  0.39600000  -0.50699580
  0.39600000  -0.50699581
  0.39700000  -0.50753892
  0.39700000  -0.50753893
  0.39700000  -0.50753894
  0.39700000  -0.50753896
  0.39700000  -0.50753897
  0.39700000  -0.50753898
  0.39700000  -0.50753900
  0.39700000  -0.50753901
  0.39700000  -0.50753903
  0.39700000  -0.50753904
  0.39700000  -0.50753905
  0.39700000  -0.50753907
  0.39700000  -0.50753908
  0.39700000  -0.50753909
  0.39700000  -0.50753911
  0.39700000  -0.50753912
  0.39700000  -0.50753913
  0.39700000  -0.50753915
  0.39700000  -0.50753916
  0.39700000  -0.50753917
  0.39700000  -0.50753919
  0.39700000  -0.50753920
  0.39700000  -0.50753921
  0.39700000  -0.50753923
  0.39700000  -0.50753924
  0.39700000  -0.50753925
  0.39700000  -0.50753927
  0.39700000  -0.50753928
  0.39700000  -0.50753929
  0.39700000  -0.50753931
  0.39700000  -0.50753932
  0.39700000  -0.50753933
  0.39700000  -0.50753935
  0.39700000  -0.50753936
  0.39700000  -0.50753937
  0.39700000  -0.50753938
  0.39700000  -0.50753940
  0.39700000  -0.50753941
  0.39700000  -0.50753942
  0.39700000  -0.50753944
  0.39800000  -0.50808115
  0.39800000  -0.50808117
  0.39800000  -0.50808118
  0.39800000  -0.50808120
  0.39800000  -0.50808121
  0.39800000  -0.50808122
  0.39800000  -0.50808124
  0.39800000  -0.50808125
  0.39800000  -0.50808126
  0.39800000  -0.50808128
  0.39800000  -0.50808129
  0.39800000  -0.50808131
  0.39800000  -0.50808132
  0.39800000  -0.50808133
  0.39800000  -0.50808135
  0.39800000  -0.50808136
  0.39800000  -0.50808137
  0.39800000  -0.50808139
  0.39800000  -0.50808140
  0.39800000  -0.50808141
  0.39800000  -0.50808143
  0.39800000  -0.50808144
  0.39800000  -0.50808145
  0.39800000  -0.50808147
  0.39800000  -0.50808148
  0.39800000  -0.50808149
  0.39800000  -0.50808151
  0.39800000  -0.50808152
  0.39800000  -0.50808153
  0.39800000  -0.50808155
  0.39800000  -0.50808156
  0.39800000  -0.50808157
  0.39800000  -0.50808159
  0.39800000  -0.50808160
  0.39800000  -0.50808161
  0.39800000  -0.50808162
  0.39800000  -0.50808164
  0.39800000  -0.50808165
  0.39800000  -0.50808166
  0.39800000  -0.50808168
  0.39900000  -0.50862201
  0.39900000  -0.50862203
  0.39900000  -0.50862204
  0.39900000  -0.50862206
  0.39900000  -0.50862207
  0.39900000  -0.50862208
  0.39900000  -0.50862210
  0.39900000  -0.50862211
  0.39900000  -0.50862212
  0.39900000  -0.50862214
  0.39900000  -0.50862215
  0.39900000  -0.50862216
  0.39900000  -0.50862218
  0.39900000  -0.50862219
  0.39900000  -0.50862221
  0.39900000  -0.50862222
  0.39900000  -0.50862223
  0.39900000  -0.50862225
  0.39900000  -0.50862226
  0.39900000  -0.50862227
  0.39900000  -0.50862229
  0.39900000  -0.50862230
  0.39900000  -0.50862231
  0.39900000  -0.50862233
  0.39900000  -0.50862234
  0.39900000  -0.50862235
  0.39900000  -0.50862237
  0.39900000  -0.50862238
  0.39900000  -0.50862239
  0.39900000  -0.50862241
  0.39900000  -0.50862242
  0.39900000  -0.50862243
  0.39900000  -0.50862244
  0.39900000  -0.50862246
  0.39900000  -0.50862247
  0.39900000  -0.50862248
  0.39900000  -0.50862250
  0.39900000  -0.50862251
  0.39900000  -0.50862252
  0.39900000  -0.50862254
  0.40000000  -0.50916150
  0.40000000  -0.50916151
  0.40000000  -0.50916153
  0.40000000  -0.50916154
  0.40000000  -0.50916155
  0.40000000  -0.50916157
  0.40000000  -0.50916158
  0.40000000  -0.50916159
  0.40000000  -0.50916161
  0.40000000  -0.50916162
  0.40000000  -0.50916164
  0.40000000  -0.50916165
  0.40000000  -0.50916166
  0.40000000  -0.50916168
  0.40000000  -0.50916169
  0.40000000  -0.50916170
  0.40000000  -0.50916172
  0.40000000  -0.50916173
  0.40000000  -0.50916174
  0.40000000  -0.50916176
  0.40000000  -0.50916177
  0.40000000  -0.50916178
  0.40000000  -0.50916180
  0.40000000  -0.50916181
  0.40000000  -0.50916182
  0.40000000  -0.50916184
  0.40000000  -0.50916185
  0.40000000  -0.50916186
  0.40000000  -0.50916188
  0.40000000  -0.50916189
  0.40000000  -0.50916190
  0.40000000  -0.50916192
  0.40000000  -0.50916193
  0.40000000  -0.50916194
  0.40000000  -0.50916196
  0.40000000  -0.50916197
  0.40000000  -0.50916198
  0.40000000  -0.50916199
  0.40000000  -0.50916201
  0.40000000  -0.50916202
  0.40100000  -0.50969961
  0.40100000  -0.50969963
  0.40100000  -0.50969964
  0.40100000  -0.50969966
  0.40100000  -0.50969967
  0.40100000  -0.50969968
  0.40100000  -0.50969970
  0.40100000  -0.50969971
  0.40100000  -0.50969972
  0.40100000  -0.50969974
  0.40100000  -0.50969975
  0.40100000  -0.50969977
  0.40100000  -0.50969978
  0.40100000  -0.50969979
  0.40100000  -0.50969981
  0.40100000  -0.50969982
  0.40100000  -0.50969983
  0.40100000  -0.50969985
  0.40100000  -0.50969986
  0.40100000  -0.50969987
  0.40100000  -0.50969989
  0.40100000  -0.50969990
  0.40100000  -0.50969991
  0.40100000  -0.50969993
  0.40100000  -0.50969994
  0.40100000  -0.50969995
  0.40100000  -0.50969997
  0.40100000  -0.50969998
  0.40100000  -0.50969999
  0.40100000  -0.50970001
  0.40100000  -0.50970002
  0.40100000  -0.50970003
  0.40100000  -0.50970005
  0.40100000  -0.50970006
  0.40100000  -0.50970007
  0.40100000  -0.50970008
  0.40100000  -0.50970010
  0.40100000  -0.50970011
  0.40100000  -0.50970012
  0.40100000  -0.50970014
  0.40200000  -0.51023637
  0.40200000  -0.51023638
  0.40200000  -0.51023640
  0.40200000  -0.51023641
  0.40200000  -0.51023642
  0.40200000  -0.51023644
  0.40200000  -0.51023645
  0.40200000  -0.51023646
  0.40200000  -0.51023648
  0.40200000  -0.51023649
  0.40200000  -0.51023651
  0.40200000  -0.51023652
  0.40200000  -0.51023653
  0.40200000  -0.51023655
  0.40200000  -0.51023656
  0.40200000  -0.51023657
  0.40200000  -0.51023659
  0.40200000  -0.51023660
  0.40200000  -0.51023661
  0.40200000  -0.51023663
  0.40200000  -0.51023664
  0.40200000  -0.51023665
  0.40200000  -0.51023667
  0.40200000  -0.51023668
  0.40200000  -0.51023669
  0.40200000  -0.51023671
  0.40200000  -0.51023672
  0.40200000  -0.51023673
  0.40200000  -0.51023675
  0.40200000  -0.51023676
  0.40200000  -0.51023677
  0.40200000  -0.51023679
  0.40200000  -0.51023680
  0.40200000  -0.51023681
  0.40200000  -0.51023683
  0.40200000  -0.51023684
  0.40200000  -0.51023685
  0.40200000  -0.51023686
  0.40200000  -0.51023688
  0.40200000  -0.51023689
  0.40300000  -0.51077177
  0.40300000  -0.51077178
  0.40300000  -0.51077179
  0.40300000  -0.51077181
  0.40300000  -0.51077182
  0.40300000  -0.51077183
  0.40300000  -0.51077185
  0.40300000  -0.51077186
  0.40300000  -0.51077188
  0.40300000  -0.51077189
  0.40300000  -0.51077190
  0.40300000  -0.51077192
  0.40300000  -0.51077193
  0.40300000  -0.51077194
  0.40300000  -0.51077196
  0.40300000  -0.51077197
  0.40300000  -0.51077199
  0.40300000  -0.51077200
  0.40300000  -0.51077201
  0.40300000  -0.51077203
  0.40300000  -0.51077204
  0.40300000  -0.51077205
  0.40300000  -0.51077207
  0.40300000  -0.51077208
  0.40300000  -0.51077209
  0.40300000  -0.51077211
  0.40300000  -0.51077212
  0.40300000  -0.51077213
  0.40300000  -0.51077215
  0.40300000  -0.51077216
  0.40300000  -0.51077217
  0.40300000  -0.51077218
  0.40300000  -0.51077220
  0.40300000  -0.51077221
  0.40300000  -0.51077222
  0.40300000  -0.51077224
  0.40300000  -0.51077225
  0.40300000  -0.51077226
  0.40300000  -0.51077228
  0.40300000  -0.51077229
  0.40400000  -0.51130581
  0.40400000  -0.51130583
  0.40400000  -0.51130584
  0.40400000  -0.51130585
  0.40400000  -0.51130587
  0.40400000  -0.51130588
  0.40400000  -0.51130590
  0.40400000  -0.51130591
  0.40400000  -0.51130592
  0.40400000  -0.51130594
  0.40400000  -0.51130595
  0.40400000  -0.51130596
  0.40400000  -0.51130598
  0.40400000  -0.51130599
  0.40400000  -0.51130601
  0.40400000  -0.51130602
  0.40400000  -0.51130603
  0.40400000  -0.51130605
  0.40400000  -0.51130606
  0.40400000  -0.51130607
  0.40400000  -0.51130609
  0.40400000  -0.51130610
  0.40400000  -0.51130611
  0.40400000  -0.51130613
  0.40400000  -0.51130614
  0.40400000  -0.51130615
  0.40400000  -0.51130617
  0.40400000  -0.51130618
  0.40400000  -0.51130619
  0.40400000  -0.51130621
  0.40400000  -0.51130622
  0.40400000  -0.51130623
  0.40400000  -0.51130625
  0.40400000  -0.51130626
  0.40400000  -0.51130627
  0.40400000  -0.51130628
  0.40400000  -0.51130630
  0.40400000  -0.51130631
  0.40400000  -0.51130632
  0.40400000  -0.51130634
  0.40500000  -0.51183852
  0.40500000  -0.51183853
  0.40500000  -0.51183854
  0.40500000  -0.51183856
  0.40500000  -0.51183857
  0.40500000  -0.51183859
  0.40500000  -0.51183860
  0.40500000  -0.51183861
  0.40500000  -0.51183863
  0.40500000  -0.51183864
  0.40500000  -0.51183865
  0.40500000  -0.51183867
  0.40500000  -0.51183868
  0.40500000  -0.51183870
  0.40500000  -0.51183871
  0.40500000  -0.51183872
  0.40500000  -0.51183874
  0.40500000  -0.51183875
  0.40500000  -0.51183876
  0.40500000  -0.51183878
  0.40500000  -0.51183879
  0.40500000  -0.51183880
  0.40500000  -0.51183882
  0.40500000  -0.51183883
  0.40500000  -0.51183884
  0.40500000  -0.51183886
  0.40500000  -0.51183887
  0.40500000  -0.51183888
  0.40500000  -0.51183890
  0.40500000  -0.51183891
  0.40500000  -0.51183892
  0.40500000  -0.51183894
  0.40500000  -0.51183895
  0.40500000  -0.51183896
  0.40500000  -0.51183898
  0.40500000  -0.51183899
  0.40500000  -0.51183900
  0.40500000  -0.51183901
  0.40500000  -0.51183903
  0.40500000  -0.51183904
  0.40600000  -0.51236988
  0.40600000  -0.51236990
  0.40600000  -0.51236991
  0.40600000  -0.51236992
  0.40600000  -0.51236994
  0.40600000  -0.51236995
  0.40600000  -0.51236996
  0.40600000  -0.51236998
  0.40600000  -0.51236999
  0.40600000  -0.51237001
  0.40600000  -0.51237002
  0.40600000  -0.51237003
  0.40600000  -0.51237005
  0.40600000  -0.51237006
  0.40600000  -0.51237007
  0.40600000  -0.51237009
  0.40600000  -0.51237010
  0.40600000  -0.51237012
  0.40600000  -0.51237013
  0.40600000  -0.51237014
  0.40600000  -0.51237016
  0.40600000  -0.51237017
  0.40600000  -0.51237018
  0.40600000  -0.51237020
  0.40600000  -0.51237021
  0.40600000  -0.51237022
  0.40600000  -0.51237024
  0.40600000  -0.51237025
  0.40600000  -0.51237026
  0.40600000  -0.51237028
  0.40600000  -0.51237029
  0.40600000  -0.51237030
  0.40600000  -0.51237031
  0.40600000  -0.51237033
  0.40600000  -0.51237034
  0.40600000  -0.51237035
  0.40600000  -0.51237037
  0.40600000  -0.51237038
  0.40600000  -0.51237039
  0.40600000  -0.51237041
  0.40700000  -0.51289991
  0.40700000  -0.51289993
  0.40700000  -0.51289994
  0.40700000  -0.51289996
  0.40700000  -0.51289997
  0.40700000  -0.51289998
  0.40700000  -0.51290000
  0.40700000  -0.51290001
  0.40700000  -0.51290003
  0.40700000  -0.51290004
  0.40700000  -0.51290005
  0.40700000  -0.51290007
  0.40700000  -0.51290008
  0.40700000  -0.51290009
  0.40700000  -0.51290011
  0.40700000  -0.51290012
  0.40700000  -0.51290013
  0.40700000  -0.51290015
  0.40700000  -0.51290016
  0.40700000  -0.51290017
  0.40700000  -0.51290019
  0.40700000  -0.51290020
  0.40700000  -0.51290022
  0.40700000  -0.51290023
  0.40700000  -0.51290024
  0.40700000  -0.51290026
  0.40700000  -0.51290027
  0.40700000  -0.51290028
  0.40700000  -0.51290030
  0.40700000  -0.51290031
  0.40700000  -0.51290032
  0.40700000  -0.51290033
  0.40700000  -0.51290035
  0.40700000  -0.51290036
  0.40700000  -0.51290037
  0.40700000  -0.51290039
  0.40700000  -0.51290040
  0.40700000  -0.51290041
  0.40700000  -0.51290043
  0.40700000  -0.51290044
  0.40800000  -0.51342862
  0.40800000  -0.51342863
  0.40800000  -0.51342865
  0.40800000  -0.51342866
  0.40800000  -0.51342868
  0.40800000  -0.51342869
  0.40800000  -0.51342870
  0.40800000  -0.51342872
  0.40800000  -0.51342873
  0.40800000  -0.51342875
  0.40800000  -0.51342876
  0.40800000  -0.51342877
  0.40800000  -0.51342879
  0.40800000  -0.51342880
  0.40800000  -0.51342881
  0.40800000  -0.51342883
  0.40800000  -0.51342884
  0.40800000  -0.51342885
  0.40800000  -0.51342887
  0.40800000  -0.51342888
  0.40800000  -0.51342889
  0.40800000  -0.51342891
  0.40800000  -0.51342892
  0.40800000  -0.51342894
  0.40800000  -0.51342895
  0.40800000  -0.51342896
  0.40800000  -0.51342898
  0.40800000  -0.51342899
  0.40800000  -0.51342900
  0.40800000  -0.51342901
  0.40800000  -0.51342903
  0.40800000  -0.51342904
  0.40800000  -0.51342905
  0.40800000  -0.51342907
  0.40800000  -0.51342908
  0.40800000  -0.51342909
  0.40800000  -0.51342911
  0.40800000  -0.51342912
  0.40800000  -0.51342913
  0.40800000  -0.51342915
  0.40900000  -0.51395601
  0.40900000  -0.51395602
  0.40900000  -0.51395603
  0.40900000  -0.51395605
  0.40900000  -0.51395606
  0.40900000  -0.51395608
  0.40900000  -0.51395609
  0.40900000  -0.51395610
  0.40900000  -0.51395612
  0.40900000  -0.51395613
  0.40900000  -0.51395614
  0.40900000  -0.51395616
  0.40900000  -0.51395617
  0.40900000  -0.51395619
  0.40900000  -0.51395620
  0.40900000  -0.51395621
  0.40900000  -0.51395623
  0.40900000  -0.51395624
  0.40900000  -0.51395625
  0.40900000  -0.51395627
  0.40900000  -0.51395628
  0.40900000  -0.51395629
  0.40900000  -0.51395631
  0.40900000  -0.51395632
  0.40900000  -0.51395633
  0.40900000  -0.51395635
  0.40900000  -0.51395636
  0.40900000  -0.51395637
  0.40900000  -0.51395639
  0.40900000  -0.51395640
  0.40900000  -0.51395641
  0.40900000  -0.51395643
  0.40900000  -0.51395644
  0.40900000  -0.51395645
  0.40900000  -0.51395647
  0.40900000  -0.51395648
  0.40900000  -0.51395649
  0.40900000  -0.51395651
  0.40900000  -0.51395652
  0.40900000  -0.51395653
  0.41000000  -0.51448208
  0.41000000  -0.51448209
  0.41000000  -0.51448210
  0.41000000  -0.51448212
  0.41000000  -0.51448213
  0.41000000  -0.51448215
  0.41000000  -0.51448216
  0.41000000  -0.51448217
  0.41000000  -0.51448219
  0.41000000  -0.51448220
  0.41000000  -0.51448222
  0.41000000  -0.51448223
  0.41000000  -0.51448224
  0.41000000  -0.51448226
  0.41000000  -0.51448227
  0.41000000  -0.51448228
  0.41000000  -0.51448230
  0.41000000  -0.51448231
  0.41000000  -0.51448232
  0.41000000  -0.51448234
  0.41000000  -0.51448235
  0.41000000  -0.51448236
  0.41000000  -0.51448238
  0.41000000  -0.51448239
  0.41000000  -0.51448241
  0.41000000  -0.51448242
  0.41000000  -0.51448243
  0.41000000  -0.51448244
  0.41000000  -0.51448246
  0.41000000  -0.51448247
  0.41000000  -0.51448248
  0.41000000  -0.51448250
  0.41000000  -0.51448251
  0.41000000  -0.51448252
  0.41000000  -0.51448254
  0.41000000  -0.51448255
  0.41000000  -0.51448256
  0.41000000  -0.51448258
  0.41000000  -0.51448259
  0.41000000  -0.51448260
  0.41100000  -0.51500684
  0.41100000  -0.51500685
  0.41100000  -0.51500687
  0.41100000  -0.51500688
  0.41100000  -0.51500689
  0.41100000  -0.51500691
  0.41100000  -0.51500692
  0.41100000  -0.51500694
  0.41100000  -0.51500695
  0.41100000  -0.51500696
  0.41100000  -0.51500698
  0.41100000  -0.51500699
  0.41100000  -0.51500700
  0.41100000  -0.51500702
  0.41100000  -0.51500703
  0.41100000  -0.51500705
  0.41100000  -0.51500706
  0.41100000  -0.51500707
  0.41100000  -0.51500709
  0.41100000  -0.51500710
  0.41100000  -0.51500711
  0.41100000  -0.51500713
  0.41100000  -0.51500714
  0.41100000  -0.51500715
  0.41100000  -0.51500717
  0.41100000  -0.51500718
  0.41100000  -0.51500719
  0.41100000  -0.51500721
  0.41100000  -0.51500722
  0.41100000  -0.51500723
  0.41100000  -0.51500725
  0.41100000  -0.51500726
  0.41100000  -0.51500727
  0.41100000  -0.51500729
  0.41100000  -0.51500730
  0.41100000  -0.51500731
  0.41100000  -0.51500733
  0.41100000  -0.51500734
  0.41100000  -0.51500735
  0.41100000  -0.51500736
  0.41200000  -0.51553030
  0.41200000  -0.51553031
  0.41200000  -0.51553032
  0.41200000  -0.51553034
  0.41200000  -0.51553035
  0.41200000  -0.51553037
  0.41200000  -0.51553038
  0.41200000  -0.51553039
  0.41200000  -0.51553041
  0.41200000  -0.51553042
  0.41200000  -0.51553043
  0.41200000  -0.51553045
  0.41200000  -0.51553046
  0.41200000  -0.51553048
  0.41200000  -0.51553049
  0.41200000  -0.51553050
  0.41200000  -0.51553052
  0.41200000  -0.51553053
  0.41200000  -0.51553054
  0.41200000  -0.51553056
  0.41200000  -0.51553057
  0.41200000  -0.51553058
  0.41200000  -0.51553060
  0.41200000  -0.51553061
  0.41200000  -0.51553062
  0.41200000  -0.51553064
  0.41200000  -0.51553065
  0.41200000  -0.51553066
  0.41200000  -0.51553068
  0.41200000  -0.51553069
  0.41200000  -0.51553070
  0.41200000  -0.51553072
  0.41200000  -0.51553073
  0.41200000  -0.51553074
  0.41200000  -0.51553076
  0.41200000  -0.51553077
  0.41200000  -0.51553078
  0.41200000  -0.51553080
  0.41200000  -0.51553081
  0.41200000  -0.51553082
  0.41300000  -0.51605246
  0.41300000  -0.51605247
  0.41300000  -0.51605248
  0.41300000  -0.51605250
  0.41300000  -0.51605251
  0.41300000  -0.51605253
  0.41300000  -0.51605254
  0.41300000  -0.51605255
  0.41300000  -0.51605257
  0.41300000  -0.51605258
  0.41300000  -0.51605260
  0.41300000  -0.51605261
  0.41300000  -0.51605262
  0.41300000  -0.51605264
  0.41300000  -0.51605265
  0.41300000  -0.51605266
  0.41300000  -0.51605268
  0.41300000  -0.51605269
  0.41300000  -0.51605270
  0.41300000  -0.51605272
  0.41300000  -0.51605273
  0.41300000  -0.51605274
  0.41300000  -0.51605276
  0.41300000  -0.51605277
  0.41300000  -0.51605279
  0.41300000  -0.51605280
  0.41300000  -0.51605281
  0.41300000  -0.51605283
  0.41300000  -0.51605284
  0.41300000  -0.51605285
  0.41300000  -0.51605287
  0.41300000  -0.51605288
  0.41300000  -0.51605289
  0.41300000  -0.51605290
  0.41300000  -0.51605292
  0.41300000  -0.51605293
  0.41300000  -0.51605294
  0.41300000  -0.51605296
  0.41300000  -0.51605297
  0.41300000  -0.51605298
  0.41400000  -0.51657332
  0.41400000  -0.51657334
  0.41400000  -0.51657335
  0.41400000  -0.51657337
  0.41400000  -0.51657338
  0.41400000  -0.51657339
  0.41400000  -0.51657341
  0.41400000  -0.51657342
  0.41400000  -0.51657344
  0.41400000  -0.51657345
  0.41400000  -0.51657346
  0.41400000  -0.51657348
  0.41400000  -0.51657349
  0.41400000  -0.51657350
  0.41400000  -0.51657352
  0.41400000  -0.51657353
  0.41400000  -0.51657355
  0.41400000  -0.51657356
  0.41400000  -0.51657357
  0.41400000  -0.51657359
  0.41400000  -0.51657360
  0.41400000  -0.51657361
  0.41400000  -0.51657363
  0.41400000  -0.51657364
  0.41400000  -0.51657365
  0.41400000  -0.51657367
  0.41400000  -0.51657368
  0.41400000  -0.51657369
  0.41400000  -0.51657371
  0.41400000  -0.51657372
  0.41400000  -0.51657373
  0.41400000  -0.51657375
  0.41400000  -0.51657376
  0.41400000  -0.51657377
  0.41400000  -0.51657379
  0.41400000  -0.51657380
  0.41400000  -0.51657381
  0.41400000  -0.51657383
  0.41400000  -0.51657384
  0.41400000  -0.51657385
  0.41500000  -0.51709291
  0.41500000  -0.51709292
  0.41500000  -0.51709293
  0.41500000  -0.51709295
  0.41500000  -0.51709296
  0.41500000  -0.51709298
  0.41500000  -0.51709299
  0.41500000  -0.51709300
  0.41500000  -0.51709302
  0.41500000  -0.51709303
  0.41500000  -0.51709304
  0.41500000  -0.51709306
  0.41500000  -0.51709307
  0.41500000  -0.51709309
  0.41500000  -0.51709310
  0.41500000  -0.51709311
  0.41500000  -0.51709313
  0.41500000  -0.51709314
  0.41500000  -0.51709315
  0.41500000  -0.51709317
  0.41500000  -0.51709318
  0.41500000  -0.51709319
  0.41500000  -0.51709321
  0.41500000  -0.51709322
  0.41500000  -0.51709323
  0.41500000  -0.51709325
  0.41500000  -0.51709326
  0.41500000  -0.51709327
  0.41500000  -0.51709329
  0.41500000  -0.51709330
  0.41500000  -0.51709331
  0.41500000  -0.51709333
  0.41500000  -0.51709334
  0.41500000  -0.51709335
  0.41500000  -0.51709337
  0.41500000  -0.51709338
  0.41500000  -0.51709339
  0.41500000  -0.51709341
  0.41500000  -0.51709342
  0.41500000  -0.51709343
  0.41600000  -0.51761121
  0.41600000  -0.51761122
  0.41600000  -0.51761123
  0.41600000  -0.51761125
  0.41600000  -0.51761126
  0.41600000  -0.51761128
  0.41600000  -0.51761129
  0.41600000  -0.51761130
  0.41600000  -0.51761132
  0.41600000  -0.51761133
  0.41600000  -0.51761134
  0.41600000  -0.51761136
  0.41600000  -0.51761137
  0.41600000  -0.51761139
  0.41600000  -0.51761140
  0.41600000  -0.51761141
  0.41600000  -0.51761143
  0.41600000  -0.51761144
  0.41600000  -0.51761145
  0.41600000  -0.51761147
  0.41600000  -0.51761148
  0.41600000  -0.51761149
  0.41600000  -0.51761151
  0.41600000  -0.51761152
  0.41600000  -0.51761154
  0.41600000  -0.51761155
  0.41600000  -0.51761156
  0.41600000  -0.51761158
  0.41600000  -0.51761159
  0.41600000  -0.51761160
  0.41600000  -0.51761162
  0.41600000  -0.51761163
  0.41600000  -0.51761164
  0.41600000  -0.51761165
  0.41600000  -0.51761167
  0.41600000  -0.51761168
  0.41600000  -0.51761169
  0.41600000  -0.51761171
  0.41600000  -0.51761172
  0.41600000  -0.51761173
  0.41700000  -0.51812823
  0.41700000  -0.51812824
  0.41700000  -0.51812826
  0.41700000  -0.51812827
  0.41700000  -0.51812829
  0.41700000  -0.51812830
  0.41700000  -0.51812831
  0.41700000  -0.51812833
  0.41700000  -0.51812834
  0.41700000  -0.51812836
  0.41700000  -0.51812837
  0.41700000  -0.51812838
  0.41700000  -0.51812840
  0.41700000  -0.51812841
  0.41700000  -0.51812842
  0.41700000  -0.51812844
  0.41700000  -0.51812845
  0.41700000  -0.51812847
  0.41700000  -0.51812848
  0.41700000  -0.51812849
  0.41700000  -0.51812851
  0.41700000  -0.51812852
  0.41700000  -0.51812853
  0.41700000  -0.51812855
  0.41700000  -0.51812856
  0.41700000  -0.51812857
  0.41700000  -0.51812859
  0.41700000  -0.51812860
  0.41700000  -0.51812861
  0.41700000  -0.51812863
  0.41700000  -0.51812864
  0.41700000  -0.51812865
  0.41700000  -0.51812867
  0.41700000  -0.51812868
  0.41700000  -0.51812869
  0.41700000  -0.51812871
  0.41700000  -0.51812872
  0.41700000  -0.51812873
  0.41700000  -0.51812875
  0.41700000  -0.51812876
  0.41800000  -0.51864398
  0.41800000  -0.51864400
  0.41800000  -0.51864401
  0.41800000  -0.51864403
  0.41800000  -0.51864404
  0.41800000  -0.51864405
  0.41800000  -0.51864407
  0.41800000  -0.51864408
  0.41800000  -0.51864410
  0.41800000  -0.51864411
  0.41800000  -0.51864412
  0.41800000  -0.51864414
  0.41800000  -0.51864415
  0.41800000  -0.51864417
  0.41800000  -0.51864418
  0.41800000  -0.51864419
  0.41800000  -0.51864421
  0.41800000  -0.51864422
  0.41800000  -0.51864423
  0.41800000  -0.51864425
  0.41800000  -0.51864426
  0.41800000  -0.51864427
  0.41800000  -0.51864429
  0.41800000  -0.51864430
  0.41800000  -0.51864431
  0.41800000  -0.51864433
  0.41800000  -0.51864434
  0.41800000  -0.51864435
  0.41800000  -0.51864437
  0.41800000  -0.51864438
  0.41800000  -0.51864439
  0.41800000  -0.51864441
  0.41800000  -0.51864442
  0.41800000  -0.51864443
  0.41800000  -0.51864445
  0.41800000  -0.51864446
  0.41800000  -0.51864447
  0.41800000  -0.51864449
  0.41800000  -0.51864450
  0.41800000  -0.51864451
  0.41900000  -0.51915847
  0.41900000  -0.51915849
  0.41900000  -0.51915850
  0.41900000  -0.51915852
  0.41900000  -0.51915853
  0.41900000  -0.51915854
  0.41900000  -0.51915856
  0.41900000  -0.51915857
  0.41900000  -0.51915859
  0.41900000  -0.51915860
  0.41900000  -0.51915861
  0.41900000  -0.51915863
  0.41900000  -0.51915864
  0.41900000  -0.51915866
  0.41900000  -0.51915867
  0.41900000  -0.51915868
  0.41900000  -0.51915870
  0.41900000  -0.51915871
  0.41900000  -0.51915872
  0.41900000  -0.51915874
  0.41900000  -0.51915875
  0.41900000  -0.51915876
  0.41900000  -0.51915878
  0.41900000  -0.51915879
  0.41900000  -0.51915880
  0.41900000  -0.51915882
  0.41900000  -0.51915883
  0.41900000  -0.51915885
  0.41900000  -0.51915886
  0.41900000  -0.51915887
  0.41900000  -0.51915889
  0.41900000  -0.51915890
  0.41900000  -0.51915891
  0.41900000  -0.51915892
  0.41900000  -0.51915894
  0.41900000  -0.51915895
  0.41900000  -0.51915896
  0.41900000  -0.51915898
  0.41900000  -0.51915899
  0.41900000  -0.51915900
  0.42000000  -0.51967170
  0.42000000  -0.51967172
  0.42000000  -0.51967173
  0.42000000  -0.51967175
  0.42000000  -0.51967176
  0.42000000  -0.51967178
  0.42000000  -0.51967179
  0.42000000  -0.51967180
  0.42000000  -0.51967182
  0.42000000  -0.51967183
  0.42000000  -0.51967184
  0.42000000  -0.51967186
  0.42000000  -0.51967187
  0.42000000  -0.51967189
  0.42000000  -0.51967190
  0.42000000  -0.51967191
  0.42000000  -0.51967193
  0.42000000  -0.51967194
  0.42000000  -0.51967195
  0.42000000  -0.51967197
  0.42000000  -0.51967198
  0.42000000  -0.51967200
  0.42000000  -0.51967201
  0.42000000  -0.51967202
  0.42000000  -0.51967204
  0.42000000  -0.51967205
  0.42000000  -0.51967206
  0.42000000  -0.51967208
  0.42000000  -0.51967209
  0.42000000  -0.51967210
  0.42000000  -0.51967212
  0.42000000  -0.51967213
  0.42000000  -0.51967214
  0.42000000  -0.51967216
  0.42000000  -0.51967217
  0.42000000  -0.51967218
  0.42000000  -0.51967220
  0.42000000  -0.51967221
  0.42000000  -0.51967222
  0.42000000  -0.51967223
  0.42100000  -0.52018368
  0.42100000  -0.52018370
  0.42100000  -0.52018371
  0.42100000  -0.52018372
  0.42100000  -0.52018374
  0.42100000  -0.52018375
  0.42100000  -0.52018377
  0.42100000  -0.52018378
  0.42100000  -0.52018379
  0.42100000  -0.52018381
  0.42100000  -0.52018382
  0.42100000  -0.52018384
  0.42100000  -0.52018385
  0.42100000  -0.52018386
  0.42100000  -0.52018388
  0.42100000  -0.52018389
  0.42100000  -0.52018390
  0.42100000  -0.52018392
  0.42100000  -0.52018393
  0.42100000  -0.52018394
  0.42100000  -0.52018396
  0.42100000  -0.52018397
  0.42100000  -0.52018399
  0.42100000  -0.52018400
  0.42100000  -0.52018401
  0.42100000  -0.52018403
  0.42100000  -0.52018404
  0.42100000  -0.52018405
  0.42100000  -0.52018407
  0.42100000  -0.52018408
  0.42100000  -0.52018409
  0.42100000  -0.52018411
  0.42100000  -0.52018412
  0.42100000  -0.52018413
  0.42100000  -0.52018415
  0.42100000  -0.52018416
  0.42100000  -0.52018417
  0.42100000  -0.52018419
  0.42100000  -0.52018420
  0.42100000  -0.52018421
  0.42200000  -0.52069441
  0.42200000  -0.52069442
  0.42200000  -0.52069444
  0.42200000  -0.52069445
  0.42200000  -0.52069447
  0.42200000  -0.52069448
  0.42200000  -0.52069449
  0.42200000  -0.52069451
  0.42200000  -0.52069452
  0.42200000  -0.52069454
  0.42200000  -0.52069455
  0.42200000  -0.52069456
  0.42200000  -0.52069458
  0.42200000  -0.52069459
  0.42200000  -0.52069460
  0.42200000  -0.52069462
  0.42200000  -0.52069463
  0.42200000  -0.52069465
  0.42200000  -0.52069466
  0.42200000  -0.52069467
  0.42200000  -0.52069469
  0.42200000  -0.52069470
  0.42200000  -0.52069471
  0.42200000  -0.52069473
  0.42200000  -0.52069474
  0.42200000  -0.52069475
  0.42200000  -0.52069477
  0.42200000  -0.52069478
  0.42200000  -0.52069479
  0.42200000  -0.52069481
  0.42200000  -0.52069482
  0.42200000  -0.52069483
  0.42200000  -0.52069485
  0.42200000  -0.52069486
  0.42200000  -0.52069487
  0.42200000  -0.52069489
  0.42200000  -0.52069490
  0.42200000  -0.52069491
  0.42200000  -0.52069493
  0.42200000  -0.52069494
  0.42300000  -0.52120389
  0.42300000  -0.52120391
  0.42300000  -0.52120392
  0.42300000  -0.52120394
  0.42300000  -0.52120395
  0.42300000  -0.52120396
  0.42300000  -0.52120398
  0.42300000  -0.52120399
  0.42300000  -0.52120401
  0.42300000  -0.52120402
  0.42300000  -0.52120403
  0.42300000  -0.52120405
  0.42300000  -0.52120406
  0.42300000  -0.52120408
  0.42300000  -0.52120409
  0.42300000  -0.52120410
  0.42300000  -0.52120412
  0.42300000  -0.52120413
  0.42300000  -0.52120414
  0.42300000  -0.52120416
  0.42300000  -0.52120417
  0.42300000  -0.52120419
  0.42300000  -0.52120420
  0.42300000  -0.52120421
  0.42300000  -0.52120423
  0.42300000  -0.52120424
  0.42300000  -0.52120425
  0.42300000  -0.52120427
  0.42300000  -0.52120428
  0.42300000  -0.52120429
  0.42300000  -0.52120431
  0.42300000  -0.52120432
  0.42300000  -0.52120433
  0.42300000  -0.52120435
  0.42300000  -0.52120436
  0.42300000  -0.52120437
  0.42300000  -0.52120439
  0.42300000  -0.52120440
  0.42300000  -0.52120441
  0.42300000  -0.52120443
  0.42400000  -0.52171214
  0.42400000  -0.52171216
  0.42400000  -0.52171217
  0.42400000  -0.52171218
  0.42400000  -0.52171220
  0.42400000  -0.52171221
  0.42400000  -0.52171223
  0.42400000  -0.52171224
  0.42400000  -0.52171225
  0.42400000  -0.52171227
  0.42400000  -0.52171228
  0.42400000  -0.52171230
  0.42400000  -0.52171231
  0.42400000  -0.52171232
  0.42400000  -0.52171234
  0.42400000  -0.52171235
  0.42400000  -0.52171236
  0.42400000  -0.52171238
  0.42400000  -0.52171239
  0.42400000  -0.52171241
  0.42400000  -0.52171242
  0.42400000  -0.52171243
  0.42400000  -0.52171245
  0.42400000  -0.52171246
  0.42400000  -0.52171247
  0.42400000  -0.52171249
  0.42400000  -0.52171250
  0.42400000  -0.52171251
  0.42400000  -0.52171253
  0.42400000  -0.52171254
  0.42400000  -0.52171255
  0.42400000  -0.52171257
  0.42400000  -0.52171258
  0.42400000  -0.52171259
  0.42400000  -0.52171261
  0.42400000  -0.52171262
  0.42400000  -0.52171263
  0.42400000  -0.52171265
  0.42400000  -0.52171266
  0.42400000  -0.52171267
  0.42500000  -0.52221916
  0.42500000  -0.52221917
  0.42500000  -0.52221918
  0.42500000  -0.52221920
  0.42500000  -0.52221921
  0.42500000  -0.52221923
  0.42500000  -0.52221924
  0.42500000  -0.52221925
  0.42500000  -0.52221927
  0.42500000  -0.52221928
  0.42500000  -0.52221930
  0.42500000  -0.52221931
  0.42500000  -0.52221932
  0.42500000  -0.52221934
  0.42500000  -0.52221935
  0.42500000  -0.52221936
  0.42500000  -0.52221938
  0.42500000  -0.52221939
  0.42500000  -0.52221941
  0.42500000  -0.52221942
  0.42500000  -0.52221943
  0.42500000  -0.52221945
  0.42500000  -0.52221946
  0.42500000  -0.52221947
  0.42500000  -0.52221949
  0.42500000  -0.52221950
  0.42500000  -0.52221951
  0.42500000  -0.52221953
  0.42500000  -0.52221954
  0.42500000  -0.52221955
  0.42500000  -0.52221957
  0.42500000  -0.52221958
  0.42500000  -0.52221959
  0.42500000  -0.52221961
  0.42500000  -0.52221962
  0.42500000  -0.52221963
  0.42500000  -0.52221965
  0.42500000  -0.52221966
  0.42500000  -0.52221967
  0.42500000  -0.52221969
  0.42600000  -0.52272494
  0.42600000  -0.52272496
  0.42600000  -0.52272497
  0.42600000  -0.52272498
  0.42600000  -0.52272500
  0.42600000  -0.52272501
  0.42600000  -0.52272503
  0.42600000  -0.52272504
  0.42600000  -0.52272505
  0.42600000  -0.52272507
  0.42600000  -0.52272508
  0.42600000  -0.52272510
  0.42600000  -0.52272511
  0.42600000  -0.52272512
  0.42600000  -0.52272514
  0.42600000  -0.52272515
  0.42600000  -0.52272517
  0.42600000  -0.52272518
  0.42600000  -0.52272519
  0.42600000  -0.52272521
  0.42600000  -0.52272522
  0.42600000  -0.52272523
  0.42600000  -0.52272525
  0.42600000  -0.52272526
  0.42600000  -0.52272527
  0.42600000  -0.52272529
  0.42600000  -0.52272530
  0.42600000  -0.52272531
  0.42600000  -0.52272533
  0.42600000  -0.52272534
  0.42600000  -0.52272535
  0.42600000  -0.52272537
  0.42600000  -0.52272538
  0.42600000  -0.52272539
  0.42600000  -0.52272541
  0.42600000  -0.52272542
  0.42600000  -0.52272543
  0.42600000  -0.52272545
  0.42600000  -0.52272546
  0.42600000  -0.52272547
  0.42700000  -0.52322951
  0.42700000  -0.52322952
  0.42700000  -0.52322953
  0.42700000  -0.52322955
  0.42700000  -0.52322956
  0.42700000  -0.52322958
  0.42700000  -0.52322959
  0.42700000  -0.52322960
  0.42700000  -0.52322962
  0.42700000  -0.52322963
  0.42700000  -0.52322965
  0.42700000  -0.52322966
  0.42700000  -0.52322967
  0.42700000  -0.52322969
  0.42700000  -0.52322970
  0.42700000  -0.52322972
  0.42700000  -0.52322973
  0.42700000  -0.52322974
  0.42700000  -0.52322976
  0.42700000  -0.52322977
  0.42700000  -0.52322978
  0.42700000  -0.52322980
  0.42700000  -0.52322981
  0.42700000  -0.52322982
  0.42700000  -0.52322984
  0.42700000  -0.52322985
  0.42700000  -0.52322987
  0.42700000  -0.52322988
  0.42700000  -0.52322989
  0.42700000  -0.52322991
  0.42700000  -0.52322992
  0.42700000  -0.52322993
  0.42700000  -0.52322995
  0.42700000  -0.52322996
  0.42700000  -0.52322997
  0.42700000  -0.52322999
  0.42700000  -0.52323000
  0.42700000  -0.52323001
  0.42700000  -0.52323002
  0.42700000  -0.52323004
  0.42800000  -0.52373285
  0.42800000  -0.52373287
  0.42800000  -0.52373288
  0.42800000  -0.52373290
  0.42800000  -0.52373291
  0.42800000  -0.52373292
  0.42800000  -0.52373294
  0.42800000  -0.52373295
  0.42800000  -0.52373297
  0.42800000  -0.52373298
  0.42800000  -0.52373299
  0.42800000  -0.52373301
  0.42800000  -0.52373302
  0.42800000  -0.52373303
  0.42800000  -0.52373305
  0.42800000  -0.52373306
  0.42800000  -0.52373308
  0.42800000  -0.52373309
  0.42800000  -0.52373310
  0.42800000  -0.52373312
  0.42800000  -0.52373313
  0.42800000  -0.52373314
  0.42800000  -0.52373316
  0.42800000  -0.52373317
  0.42800000  -0.52373319
  0.42800000  -0.52373320
  0.42800000  -0.52373321
  0.42800000  -0.52373323
  0.42800000  -0.52373324
  0.42800000  -0.52373325
  0.42800000  -0.52373327
  0.42800000  -0.52373328
  0.42800000  -0.52373329
  0.42800000  -0.52373331
  0.42800000  -0.52373332
  0.42800000  -0.52373333
  0.42800000  -0.52373335
  0.42800000  -0.52373336
  0.42800000  -0.52373337
  0.42800000  -0.52373338
  0.42900000  -0.52423499
  0.42900000  -0.52423500
  0.42900000  -0.52423502
  0.42900000  -0.52423503
  0.42900000  -0.52423504
  0.42900000  -0.52423506
  0.42900000  -0.52423507
  0.42900000  -0.52423509
  0.42900000  -0.52423510
  0.42900000  -0.52423511
  0.42900000  -0.52423513
  0.42900000  -0.52423514
  0.42900000  -0.52423516
  0.42900000  -0.52423517
  0.42900000  -0.52423518
  0.42900000  -0.52423520
  0.42900000  -0.52423521
  0.42900000  -0.52423522
  0.42900000  -0.52423524
  0.42900000  -0.52423525
  0.42900000  -0.52423527
  0.42900000  -0.52423528
  0.42900000  -0.52423529
  0.42900000  -0.52423531
  0.42900000  -0.52423532
  0.42900000  -0.52423533
  0.42900000  -0.52423535
  0.42900000  -0.52423536
  0.42900000  -0.52423537
  0.42900000  -0.52423539
  0.42900000  -0.52423540
  0.42900000  -0.52423541
  0.42900000  -0.52423543
  0.42900000  -0.52423544
  0.42900000  -0.52423545
  0.42900000  -0.52423547
  0.42900000  -0.52423548
  0.42900000  -0.52423549
  0.42900000  -0.52423551
  0.42900000  -0.52423552
  0.43000000  -0.52473591
  0.43000000  -0.52473593
  0.43000000  -0.52473594
  0.43000000  -0.52473596
  0.43000000  -0.52473597
  0.43000000  -0.52473599
  0.43000000  -0.52473600
  0.43000000  -0.52473601
  0.43000000  -0.52473603
  0.43000000  -0.52473604
  0.43000000  -0.52473606
  0.43000000  -0.52473607
  0.43000000  -0.52473608
  0.43000000  -0.52473610
  0.43000000  -0.52473611
  0.43000000  -0.52473612
  0.43000000  -0.52473614
  0.43000000  -0.52473615
  0.43000000  -0.52473617
  0.43000000  -0.52473618
  0.43000000  -0.52473619
  0.43000000  -0.52473621
  0.43000000  -0.52473622
  0.43000000  -0.52473623
  0.43000000  -0.52473625
  0.43000000  -0.52473626
  0.43000000  -0.52473627
  0.43000000  -0.52473629
  0.43000000  -0.52473630
  0.43000000  -0.52473632
  0.43000000  -0.52473633
  0.43000000  -0.52473634
  0.43000000  -0.52473636
  0.43000000  -0.52473637
  0.43000000  -0.52473638
  0.43000000  -0.52473639
  0.43000000  -0.52473641
  0.43000000  -0.52473642
  0.43000000  -0.52473643
  0.43000000  -0.52473645
  0.43100000  -0.52523564
  0.43100000  -0.52523565
  0.43100000  -0.52523567
  0.43100000  -0.52523568
  0.43100000  -0.52523570
  0.43100000  -0.52523571
  0.43100000  -0.52523573
  0.43100000  -0.52523574
  0.43100000  -0.52523575
  0.43100000  -0.52523577
  0.43100000  -0.52523578
  0.43100000  -0.52523579
  0.43100000  -0.52523581
  0.43100000  -0.52523582
  0.43100000  -0.52523584
  0.43100000  -0.52523585
  0.43100000  -0.52523586
  0.43100000  -0.52523588
  0.43100000  -0.52523589
  0.43100000  -0.52523591
  0.43100000  -0.52523592
  0.43100000  -0.52523593
  0.43100000  -0.52523595
  0.43100000  -0.52523596
  0.43100000  -0.52523597
  0.43100000  -0.52523599
  0.43100000  -0.52523600
  0.43100000  -0.52523601
  0.43100000  -0.52523603
  0.43100000  -0.52523604
  0.43100000  -0.52523605
  0.43100000  -0.52523607
  0.43100000  -0.52523608
  0.43100000  -0.52523609
  0.43100000  -0.52523611
  0.43100000  -0.52523612
  0.43100000  -0.52523613
  0.43100000  -0.52523615
  0.43100000  -0.52523616
  0.43100000  -0.52523617
  0.43200000  -0.52573417
  0.43200000  -0.52573418
  0.43200000  -0.52573420
  0.43200000  -0.52573421
  0.43200000  -0.52573423
  0.43200000  -0.52573424
  0.43200000  -0.52573425
  0.43200000  -0.52573427
  0.43200000  -0.52573428
  0.43200000  -0.52573430
  0.43200000  -0.52573431
  0.43200000  -0.52573432
  0.43200000  -0.52573434
  0.43200000  -0.52573435
  0.43200000  -0.52573436
  0.43200000  -0.52573438
  0.43200000  -0.52573439
  0.43200000  -0.52573441
  0.43200000  -0.52573442
  0.43200000  -0.52573443
  0.43200000  -0.52573445
  0.43200000  -0.52573446
  0.43200000  -0.52573447
  0.43200000  -0.52573449
  0.43200000  -0.52573450
  0.43200000  -0.52573452
  0.43200000  -0.52573453
  0.43200000  -0.52573454
  0.43200000  -0.52573456
  0.43200000  -0.52573457
  0.43200000  -0.52573458
  0.43200000  -0.52573460
  0.43200000  -0.52573461
  0.43200000  -0.52573462
  0.43200000  -0.52573464
  0.43200000  -0.52573465
  0.43200000  -0.52573466
  0.43200000  -0.52573468
  0.43200000  -0.52573469
  0.43200000  -0.52573470
  0.43300000  -0.52623150
  0.43300000  -0.52623152
  0.43300000  -0.52623153
  0.43300000  -0.52623155
  0.43300000  -0.52623156
  0.43300000  -0.52623158
  0.43300000  -0.52623159
  0.43300000  -0.52623160
  0.43300000  -0.52623162
  0.43300000  -0.52623163
  0.43300000  -0.52623165
  0.43300000  -0.52623166
  0.43300000  -0.52623167
  0.43300000  -0.52623169
  0.43300000  -0.52623170
  0.43300000  -0.52623171
  0.43300000  -0.52623173
  0.43300000  -0.52623174
  0.43300000  -0.52623176
  0.43300000  -0.52623177
  0.43300000  -0.52623178
  0.43300000  -0.52623180
  0.43300000  -0.52623181
  0.43300000  -0.52623182
  0.43300000  -0.52623184
  0.43300000  -0.52623185
  0.43300000  -0.52623187
  0.43300000  -0.52623188
  0.43300000  -0.52623189
  0.43300000  -0.52623191
  0.43300000  -0.52623192
  0.43300000  -0.52623193
  0.43300000  -0.52623195
  0.43300000  -0.52623196
  0.43300000  -0.52623197
  0.43300000  -0.52623199
  0.43300000  -0.52623200
  0.43300000  -0.52623201
  0.43300000  -0.52623203
  0.43300000  -0.52623204
  0.43400000  -0.52672765
  0.43400000  -0.52672767
  0.43400000  -0.52672768
  0.43400000  -0.52672770
  0.43400000  -0.52672771
  0.43400000  -0.52672772
  0.43400000  -0.52672774
  0.43400000  -0.52672775
  0.43400000  -0.52672777
  0.43400000  -0.52672778
  0.43400000  -0.52672779
  0.43400000  -0.52672781
  0.43400000  -0.52672782
  0.43400000  -0.52672784
  0.43400000  -0.52672785
  0.43400000  -0.52672786
  0.43400000  -0.52672788
  0.43400000  -0.52672789
  0.43400000  -0.52672791
  0.43400000  -0.52672792
  0.43400000  -0.52672793
  0.43400000  -0.52672795
  0.43400000  -0.52672796
  0.43400000  -0.52672797
  0.43400000  -0.52672799
  0.43400000  -0.52672800
  0.43400000  -0.52672801
  0.43400000  -0.52672803
  0.43400000  -0.52672804
  0.43400000  -0.52672805
  0.43400000  -0.52672807
  0.43400000  -0.52672808
  0.43400000  -0.52672809
  0.43400000  -0.52672811
  0.43400000  -0.52672812
  0.43400000  -0.52672813
  0.43400000  -0.52672815
  0.43400000  -0.52672816
  0.43400000  -0.52672817
  0.43400000  -0.52672819
  0.43500000  -0.52722262
  0.43500000  -0.52722263
  0.43500000  -0.52722265
  0.43500000  -0.52722266
  0.43500000  -0.52722268
  0.43500000  -0.52722269
  0.43500000  -0.52722271
  0.43500000  -0.52722272
  0.43500000  -0.52722273
  0.43500000  -0.52722275
  0.43500000  -0.52722276
  0.43500000  -0.52722278
  0.43500000  -0.52722279
  0.43500000  -0.52722280
  0.43500000  -0.52722282
  0.43500000  -0.52722283
  0.43500000  -0.52722284
  0.43500000  -0.52722286
  0.43500000  -0.52722287
  0.43500000  -0.52722289
  0.43500000  -0.52722290
  0.43500000  -0.52722291
  0.43500000  -0.52722293
  0.43500000  -0.52722294
  0.43500000  -0.52722295
  0.43500000  -0.52722297
  0.43500000  -0.52722298
  0.43500000  -0.52722299
  0.43500000  -0.52722301
  0.43500000  -0.52722302
  0.43500000  -0.52722303
  0.43500000  -0.52722305
  0.43500000  -0.52722306
  0.43500000  -0.52722307
  0.43500000  -0.52722309
  0.43500000  -0.52722310
  0.43500000  -0.52722311
  0.43500000  -0.52722313
  0.43500000  -0.52722314
  0.43500000  -0.52722315
  0.43600000  -0.52771641
  0.43600000  -0.52771642
  0.43600000  -0.52771644
  0.43600000  -0.52771645
  0.43600000  -0.52771647
  0.43600000  -0.52771648
  0.43600000  -0.52771649
  0.43600000  -0.52771651
  0.43600000  -0.52771652
  0.43600000  -0.52771654
  0.43600000  -0.52771655
  0.43600000  -0.52771656
  0.43600000  -0.52771658
  0.43600000  -0.52771659
  0.43600000  -0.52771661
  0.43600000  -0.52771662
  0.43600000  -0.52771663
  0.43600000  -0.52771665
  0.43600000  -0.52771666
  0.43600000  -0.52771668
  0.43600000  -0.52771669
  0.43600000  -0.52771670
  0.43600000  -0.52771672
  0.43600000  -0.52771673
  0.43600000  -0.52771674
  0.43600000  -0.52771676
  0.43600000  -0.52771677
  0.43600000  -0.52771678
  0.43600000  -0.52771680
  0.43600000  -0.52771681
  0.43600000  -0.52771682
  0.43600000  -0.52771684
  0.43600000  -0.52771685
  0.43600000  -0.52771686
  0.43600000  -0.52771688
  0.43600000  -0.52771689
  0.43600000  -0.52771690
  0.43600000  -0.52771692
  0.43600000  -0.52771693
  0.43600000  -0.52771694
  0.43700000  -0.52820903
  0.43700000  -0.52820904
  0.43700000  -0.52820905
  0.43700000  -0.52820907
  0.43700000  -0.52820908
  0.43700000  -0.52820910
  0.43700000  -0.52820911
  0.43700000  -0.52820913
  0.43700000  -0.52820914
  0.43700000  -0.52820915
  0.43700000  -0.52820917
  0.43700000  -0.52820918
  0.43700000  -0.52820920
  0.43700000  -0.52820921
  0.43700000  -0.52820922
  0.43700000  -0.52820924
  0.43700000  -0.52820925
  0.43700000  -0.52820926
  0.43700000  -0.52820928
  0.43700000  -0.52820929
  0.43700000  -0.52820931
  0.43700000  -0.52820932
  0.43700000  -0.52820933
  0.43700000  -0.52820935
  0.43700000  -0.52820936
  0.43700000  -0.52820937
  0.43700000  -0.52820939
  0.43700000  -0.52820940
  0.43700000  -0.52820941
  0.43700000  -0.52820943
  0.43700000  -0.52820944
  0.43700000  -0.52820945
  0.43700000  -0.52820947
  0.43700000  -0.52820948
  0.43700000  -0.52820949
  0.43700000  -0.52820951
  0.43700000  -0.52820952
  0.43700000  -0.52820953
  0.43700000  -0.52820955
  0.43700000  -0.52820956
  0.43800000  -0.52870047
  0.43800000  -0.52870049
  0.43800000  -0.52870050
  0.43800000  -0.52870052
  0.43800000  -0.52870053
  0.43800000  -0.52870055
  0.43800000  -0.52870056
  0.43800000  -0.52870057
  0.43800000  -0.52870059
  0.43800000  -0.52870060
  0.43800000  -0.52870062
  0.43800000  -0.52870063
  0.43800000  -0.52870064
  0.43800000  -0.52870066
  0.43800000  -0.52870067
  0.43800000  -0.52870069
  0.43800000  -0.52870070
  0.43800000  -0.52870071
  0.43800000  -0.52870073
  0.43800000  -0.52870074
  0.43800000  -0.52870075
  0.43800000  -0.52870077
  0.43800000  -0.52870078
  0.43800000  -0.52870080
  0.43800000  -0.52870081
  0.43800000  -0.52870082
  0.43800000  -0.52870084
  0.43800000  -0.52870085
  0.43800000  -0.52870086
  0.43800000  -0.52870088
  0.43800000  -0.52870089
  0.43800000  -0.52870090
  0.43800000  -0.52870092
  0.43800000  -0.52870093
  0.43800000  -0.52870094
  0.43800000  -0.52870096
  0.43800000  -0.52870097
  0.43800000  -0.52870098
  0.43800000  -0.52870100
  0.43800000  -0.52870101
  0.43900000  -0.52919076
  0.43900000  -0.52919078
  0.43900000  -0.52919079
  0.43900000  -0.52919080
  0.43900000  -0.52919082
  0.43900000  -0.52919083
  0.43900000  -0.52919085
  0.43900000  -0.52919086
  0.43900000  -0.52919087
  0.43900000  -0.52919089
  0.43900000  -0.52919090
  0.43900000  -0.52919092
  0.43900000  -0.52919093
  0.43900000  -0.52919094
  0.43900000  -0.52919096
  0.43900000  -0.52919097
  0.43900000  -0.52919099
  0.43900000  -0.52919100
  0.43900000  -0.52919101
  0.43900000  -0.52919103
  0.43900000  -0.52919104
  0.43900000  -0.52919105
  0.43900000  -0.52919107
  0.43900000  -0.52919108
  0.43900000  -0.52919110
  0.43900000  -0.52919111
  0.43900000  -0.52919112
  0.43900000  -0.52919114
  0.43900000  -0.52919115
  0.43900000  -0.52919116
  0.43900000  -0.52919118
  0.43900000  -0.52919119
  0.43900000  -0.52919120
  0.43900000  -0.52919122
  0.43900000  -0.52919123
  0.43900000  -0.52919124
  0.43900000  -0.52919126
  0.43900000  -0.52919127
  0.43900000  -0.52919128
  0.43900000  -0.52919130
  0.44000000  -0.52967989
  0.44000000  -0.52967990
  0.44000000  -0.52967992
  0.44000000  -0.52967993
  0.44000000  -0.52967995
  0.44000000  -0.52967996
  0.44000000  -0.52967997
  0.44000000  -0.52967999
  0.44000000  -0.52968000
  0.44000000  -0.52968002
  0.44000000  -0.52968003
  0.44000000  -0.52968004
  0.44000000  -0.52968006
  0.44000000  -0.52968007
  0.44000000  -0.52968009
  0.44000000  -0.52968010
  0.44000000  -0.52968011
  0.44000000  -0.52968013
  0.44000000  -0.52968014
  0.44000000  -0.52968015
  0.44000000  -0.52968017
  0.44000000  -0.52968018
  0.44000000  -0.52968020
  0.44000000  -0.52968021
  0.44000000  -0.52968022
  0.44000000  -0.52968024
  0.44000000  -0.52968025
  0.44000000  -0.52968026
  0.44000000  -0.52968028
  0.44000000  -0.52968029
  0.44000000  -0.52968030
  0.44000000  -0.52968032
  0.44000000  -0.52968033
  0.44000000  -0.52968034
  0.44000000  -0.52968036
  0.44000000  -0.52968037
  0.44000000  -0.52968038
  0.44000000  -0.52968040
  0.44000000  -0.52968041
  0.44000000  -0.52968042
  0.44100000  -0.53016786
  0.44100000  -0.53016788
  0.44100000  -0.53016789
  0.44100000  -0.53016791
  0.44100000  -0.53016792
  0.44100000  -0.53016793
  0.44100000  -0.53016795
  0.44100000  -0.53016796
  0.44100000  -0.53016798
  0.44100000  -0.53016799
  0.44100000  -0.53016800
  0.44100000  -0.53016802
  0.44100000  -0.53016803
  0.44100000  -0.53016805
  0.44100000  -0.53016806
  0.44100000  -0.53016807
  0.44100000  -0.53016809
  0.44100000  -0.53016810
  0.44100000  -0.53016812
  0.44100000  -0.53016813
  0.44100000  -0.53016814
  0.44100000  -0.53016816
  0.44100000  -0.53016817
  0.44100000  -0.53016818
  0.44100000  -0.53016820
  0.44100000  -0.53016821
  0.44100000  -0.53016822
  0.44100000  -0.53016824
  0.44100000  -0.53016825
  0.44100000  -0.53016826
  0.44100000  -0.53016828
  0.44100000  -0.53016829
  0.44100000  -0.53016831
  0.44100000  -0.53016832
  0.44100000  -0.53016833
  0.44100000  -0.53016835
  0.44100000  -0.53016836
  0.44100000  -0.53016837
  0.44100000  -0.53016839
  0.44100000  -0.53016840
  0.44200000  -0.53065469
  0.44200000  -0.53065470
  0.44200000  -0.53065472
  0.44200000  -0.53065473
  0.44200000  -0.53065474
  0.44200000  -0.53065476
  0.44200000  -0.53065477
  0.44200000  -0.53065479
  0.44200000  -0.53065480
  0.44200000  -0.53065482
  0.44200000  -0.53065483
  0.44200000  -0.53065484
  0.44200000  -0.53065486
  0.44200000  -0.53065487
  0.44200000  -0.53065489
  0.44200000  -0.53065490
  0.44200000  -0.53065491
  0.44200000  -0.53065493
  0.44200000  -0.53065494
  0.44200000  -0.53065495
  0.44200000  -0.53065497
  0.44200000  -0.53065498
  0.44200000  -0.53065500
  0.44200000  -0.53065501
  0.44200000  -0.53065502
  0.44200000  -0.53065504
  0.44200000  -0.53065505
  0.44200000  -0.53065506
  0.44200000  -0.53065508
  0.44200000  -0.53065509
  0.44200000  -0.53065510
  0.44200000  -0.53065512
  0.44200000  -0.53065513
  0.44200000  -0.53065514
  0.44200000  -0.53065516
  0.44200000  -0.53065517
  0.44200000  -0.53065518
  0.44200000  -0.53065520
  0.44200000  -0.53065521
  0.44200000  -0.53065522
  0.44300000  -0.53114037
  0.44300000  -0.53114038
  0.44300000  -0.53114040
  0.44300000  -0.53114041
  0.44300000  -0.53114043
  0.44300000  -0.53114044
  0.44300000  -0.53114045
  0.44300000  -0.53114047
  0.44300000  -0.53114048
  0.44300000  -0.53114050
  0.44300000  -0.53114051
  0.44300000  -0.53114052
  0.44300000  -0.53114054
  0.44300000  -0.53114055
  0.44300000  -0.53114057
  0.44300000  -0.53114058
  0.44300000  -0.53114059
  0.44300000  -0.53114061
  0.44300000  -0.53114062
  0.44300000  -0.53114064
  0.44300000  -0.53114065
  0.44300000  -0.53114066
  0.44300000  -0.53114068
  0.44300000  -0.53114069
  0.44300000  -0.53114070
  0.44300000  -0.53114072
  0.44300000  -0.53114073
  0.44300000  -0.53114074
  0.44300000  -0.53114076
  0.44300000  -0.53114077
  0.44300000  -0.53114079
  0.44300000  -0.53114080
  0.44300000  -0.53114081
  0.44300000  -0.53114083
  0.44300000  -0.53114084
  0.44300000  -0.53114085
  0.44300000  -0.53114087
  0.44300000  -0.53114088
  0.44300000  -0.53114089
  0.44300000  -0.53114091
  0.44400000  -0.53162491
  0.44400000  -0.53162492
  0.44400000  -0.53162494
  0.44400000  -0.53162495
  0.44400000  -0.53162497
  0.44400000  -0.53162498
  0.44400000  -0.53162500
  0.44400000  -0.53162501
  0.44400000  -0.53162502
  0.44400000  -0.53162504
  0.44400000  -0.53162505
  0.44400000  -0.53162507
  0.44400000  -0.53162508
  0.44400000  -0.53162509
  0.44400000  -0.53162511
  0.44400000  -0.53162512
  0.44400000  -0.53162514
  0.44400000  -0.53162515
  0.44400000  -0.53162516
  0.44400000  -0.53162518
  0.44400000  -0.53162519
  0.44400000  -0.53162520
  0.44400000  -0.53162522
  0.44400000  -0.53162523
  0.44400000  -0.53162525
  0.44400000  -0.53162526
  0.44400000  -0.53162527
  0.44400000  -0.53162529
  0.44400000  -0.53162530
  0.44400000  -0.53162531
  0.44400000  -0.53162533
  0.44400000  -0.53162534
  0.44400000  -0.53162535
  0.44400000  -0.53162537
  0.44400000  -0.53162538
  0.44400000  -0.53162539
  0.44400000  -0.53162541
  0.44400000  -0.53162542
  0.44400000  -0.53162543
  0.44400000  -0.53162545
  0.44500000  -0.53210832
  0.44500000  -0.53210833
  0.44500000  -0.53210835
  0.44500000  -0.53210836
  0.44500000  -0.53210837
  0.44500000  -0.53210839
  0.44500000  -0.53210840
  0.44500000  -0.53210842
  0.44500000  -0.53210843
  0.44500000  -0.53210844
  0.44500000  -0.53210846
  0.44500000  -0.53210847
  0.44500000  -0.53210849
  0.44500000  -0.53210850
  0.44500000  -0.53210851
  0.44500000  -0.53210853
  0.44500000  -0.53210854
  0.44500000  -0.53210856
  0.44500000  -0.53210857
  0.44500000  -0.53210858
  0.44500000  -0.53210860
  0.44500000  -0.53210861
  0.44500000  -0.53210863
  0.44500000  -0.53210864
  0.44500000  -0.53210865
  0.44500000  -0.53210867
  0.44500000  -0.53210868
  0.44500000  -0.53210869
  0.44500000  -0.53210871
  0.44500000  -0.53210872
  0.44500000  -0.53210873
  0.44500000  -0.53210875
  0.44500000  -0.53210876
  0.44500000  -0.53210877
  0.44500000  -0.53210879
  0.44500000  -0.53210880
  0.44500000  -0.53210881
  0.44500000  -0.53210883
  0.44500000  -0.53210884
  0.44500000  -0.53210885
  0.44600000  -0.53259059
  0.44600000  -0.53259061
  0.44600000  -0.53259062
  0.44600000  -0.53259064
  0.44600000  -0.53259065
  0.44600000  -0.53259066
  0.44600000  -0.53259068
  0.44600000  -0.53259069
  0.44600000  -0.53259071
  0.44600000  -0.53259072
  0.44600000  -0.53259074
  0.44600000  -0.53259075
  0.44600000  -0.53259076
  0.44600000  -0.53259078
  0.44600000  -0.53259079
  0.44600000  -0.53259081
  0.44600000  -0.53259082
  0.44600000  -0.53259083
  0.44600000  -0.53259085
  0.44600000  -0.53259086
  0.44600000  -0.53259087
  0.44600000  -0.53259089
  0.44600000  -0.53259090
  0.44600000  -0.53259092
  0.44600000  -0.53259093
  0.44600000  -0.53259094
  0.44600000  -0.53259096
  0.44600000  -0.53259097
  0.44600000  -0.53259098
  0.44600000  -0.53259100
  0.44600000  -0.53259101
  0.44600000  -0.53259102
  0.44600000  -0.53259104
  0.44600000  -0.53259105
  0.44600000  -0.53259106
  0.44600000  -0.53259108
  0.44600000  -0.53259109
  0.44600000  -0.53259110
  0.44600000  -0.53259112
  0.44600000  -0.53259113
  0.44700000  -0.53307174
  0.44700000  -0.53307176
  0.44700000  -0.53307177
  0.44700000  -0.53307179
  0.44700000  -0.53307180
  0.44700000  -0.53307182
  0.44700000  -0.53307183
  0.44700000  -0.53307184
  0.44700000  -0.53307186
  0.44700000  -0.53307187
  0.44700000  -0.53307189
  0.44700000  -0.53307190
  0.44700000  -0.53307191
  0.44700000  -0.53307193
  0.44700000  -0.53307194
  0.44700000  -0.53307196
  0.44700000  -0.53307197
  0.44700000  -0.53307198
  0.44700000  -0.53307200
  0.44700000  -0.53307201
  0.44700000  -0.53307203
  0.44700000  -0.53307204
  0.44700000  -0.53307205
  0.44700000  -0.53307207
  0.44700000  -0.53307208
  0.44700000  -0.53307209
  0.44700000  -0.53307211
  0.44700000  -0.53307212
  0.44700000  -0.53307213
  0.44700000  -0.53307215
  0.44700000  -0.53307216
  0.44700000  -0.53307217
  0.44700000  -0.53307219
  0.44700000  -0.53307220
  0.44700000  -0.53307222
  0.44700000  -0.53307223
  0.44700000  -0.53307224
  0.44700000  -0.53307226
  0.44700000  -0.53307227
  0.44700000  -0.53307228
  0.44800000  -0.53355177
  0.44800000  -0.53355179
  0.44800000  -0.53355180
  0.44800000  -0.53355182
  0.44800000  -0.53355183
  0.44800000  -0.53355184
  0.44800000  -0.53355186
  0.44800000  -0.53355187
  0.44800000  -0.53355189
  0.44800000  -0.53355190
  0.44800000  -0.53355192
  0.44800000  -0.53355193
  0.44800000  -0.53355194
  0.44800000  -0.53355196
  0.44800000  -0.53355197
  0.44800000  -0.53355199
  0.44800000  -0.53355200
  0.44800000  -0.53355201
  0.44800000  -0.53355203
  0.44800000  -0.53355204
  0.44800000  -0.53355205
  0.44800000  -0.53355207
  0.44800000  -0.53355208
  0.44800000  -0.53355210
  0.44800000  -0.53355211
  0.44800000  -0.53355212
  0.44800000  -0.53355214
  0.44800000  -0.53355215
  0.44800000  -0.53355216
  0.44800000  -0.53355218
  0.44800000  -0.53355219
  0.44800000  -0.53355220
  0.44800000  -0.53355222
  0.44800000  -0.53355223
  0.44800000  -0.53355224
  0.44800000  -0.53355226
  0.44800000  -0.53355227
  0.44800000  -0.53355228
  0.44800000  -0.53355230
  0.44800000  -0.53355231
  0.44900000  -0.53403069
  0.44900000  -0.53403070
  0.44900000  -0.53403071
  0.44900000  -0.53403073
  0.44900000  -0.53403074
  0.44900000  -0.53403076
  0.44900000  -0.53403077
  0.44900000  -0.53403079
  0.44900000  -0.53403080
  0.44900000  -0.53403081
  0.44900000  -0.53403083
  0.44900000  -0.53403084
  0.44900000  -0.53403086
  0.44900000  -0.53403087
  0.44900000  -0.53403088
  0.44900000  -0.53403090
  0.44900000  -0.53403091
  0.44900000  -0.53403093
  0.44900000  -0.53403094
  0.44900000  -0.53403095
  0.44900000  -0.53403097
  0.44900000  -0.53403098
  0.44900000  -0.53403099
  0.44900000  -0.53403101
  0.44900000  -0.53403102
  0.44900000  -0.53403104
  0.44900000  -0.53403105
  0.44900000  -0.53403106
  0.44900000  -0.53403108
  0.44900000  -0.53403109
  0.44900000  -0.53403110
  0.44900000  -0.53403112
  0.44900000  -0.53403113
  0.44900000  -0.53403114
  0.44900000  -0.53403116
  0.44900000  -0.53403117
  0.44900000  -0.53403118
  0.44900000  -0.53403120
  0.44900000  -0.53403121
  0.44900000  -0.53403122
  0.45000000  -0.53450849
  0.45000000  -0.53450850
  0.45000000  -0.53450852
  0.45000000  -0.53450853
  0.45000000  -0.53450854
  0.45000000  -0.53450856
  0.45000000  -0.53450857
  0.45000000  -0.53450859
  0.45000000  -0.53450860
  0.45000000  -0.53450861
  0.45000000  -0.53450863
  0.45000000  -0.53450864
  0.45000000  -0.53450866
  0.45000000  -0.53450867
  0.45000000  -0.53450868
  0.45000000  -0.53450870
  0.45000000  -0.53450871
  0.45000000  -0.53450873
  0.45000000  -0.53450874
  0.45000000  -0.53450875
  0.45000000  -0.53450877
  0.45000000  -0.53450878
  0.45000000  -0.53450880
  0.45000000  -0.53450881
  0.45000000  -0.53450882
  0.45000000  -0.53450884
  0.45000000  -0.53450885
  0.45000000  -0.53450886
  0.45000000  -0.53450888
  0.45000000  -0.53450889
  0.45000000  -0.53450890
  0.45000000  -0.53450892
  0.45000000  -0.53450893
  0.45000000  -0.53450894
  0.45000000  -0.53450896
  0.45000000  -0.53450897
  0.45000000  -0.53450898
  0.45000000  -0.53450900
  0.45000000  -0.53450901
  0.45000000  -0.53450902
  0.45100000  -0.53498518
  0.45100000  -0.53498519
  0.45100000  -0.53498521
  0.45100000  -0.53498522
  0.45100000  -0.53498524
  0.45100000  -0.53498525
  0.45100000  -0.53498526
  0.45100000  -0.53498528
  0.45100000  -0.53498529
  0.45100000  -0.53498531
  0.45100000  -0.53498532
  0.45100000  -0.53498534
  0.45100000  -0.53498535
  0.45100000  -0.53498536
  0.45100000  -0.53498538
  0.45100000  -0.53498539
  0.45100000  -0.53498540
  0.45100000  -0.53498542
  0.45100000  -0.53498543
  0.45100000  -0.53498545
  0.45100000  -0.53498546
  0.45100000  -0.53498547
  0.45100000  -0.53498549
  0.45100000  -0.53498550
  0.45100000  -0.53498552
  0.45100000  -0.53498553
  0.45100000  -0.53498554
  0.45100000  -0.53498556
  0.45100000  -0.53498557
  0.45100000  -0.53498558
  0.45100000  -0.53498560
  0.45100000  -0.53498561
  0.45100000  -0.53498562
  0.45100000  -0.53498564
  0.45100000  -0.53498565
  0.45100000  -0.53498566
  0.45100000  -0.53498568
  0.45100000  -0.53498569
  0.45100000  -0.53498570
  0.45100000  -0.53498572
  0.45200000  -0.53546077
  0.45200000  -0.53546078
  0.45200000  -0.53546080
  0.45200000  -0.53546081
  0.45200000  -0.53546083
  0.45200000  -0.53546084
  0.45200000  -0.53546085
  0.45200000  -0.53546087
  0.45200000  -0.53546088
  0.45200000  -0.53546090
  0.45200000  -0.53546091
  0.45200000  -0.53546092
  0.45200000  -0.53546094
  0.45200000  -0.53546095
  0.45200000  -0.53546097
  0.45200000  -0.53546098
  0.45200000  -0.53546099
  0.45200000  -0.53546101
  0.45200000  -0.53546102
  0.45200000  -0.53546104
  0.45200000  -0.53546105
  0.45200000  -0.53546106
  0.45200000  -0.53546108
  0.45200000  -0.53546109
  0.45200000  -0.53546110
  0.45200000  -0.53546112
  0.45200000  -0.53546113
  0.45200000  -0.53546115
  0.45200000  -0.53546116
  0.45200000  -0.53546117
  0.45200000  -0.53546119
  0.45200000  -0.53546120
  0.45200000  -0.53546121
  0.45200000  -0.53546123
  0.45200000  -0.53546124
  0.45200000  -0.53546125
  0.45200000  -0.53546127
  0.45200000  -0.53546128
  0.45200000  -0.53546129
  0.45200000  -0.53546131
  0.45300000  -0.53593526
  0.45300000  -0.53593527
  0.45300000  -0.53593529
  0.45300000  -0.53593530
  0.45300000  -0.53593532
  0.45300000  -0.53593533
  0.45300000  -0.53593534
  0.45300000  -0.53593536
  0.45300000  -0.53593537
  0.45300000  -0.53593539
  0.45300000  -0.53593540
  0.45300000  -0.53593541
  0.45300000  -0.53593543
  0.45300000  -0.53593544
  0.45300000  -0.53593546
  0.45300000  -0.53593547
  0.45300000  -0.53593548
  0.45300000  -0.53593550
  0.45300000  -0.53593551
  0.45300000  -0.53593553
  0.45300000  -0.53593554
  0.45300000  -0.53593555
  0.45300000  -0.53593557
  0.45300000  -0.53593558
  0.45300000  -0.53593559
  0.45300000  -0.53593561
  0.45300000  -0.53593562
  0.45300000  -0.53593564
  0.45300000  -0.53593565
  0.45300000  -0.53593566
  0.45300000  -0.53593568
  0.45300000  -0.53593569
  0.45300000  -0.53593570
  0.45300000  -0.53593572
  0.45300000  -0.53593573
  0.45300000  -0.53593574
  0.45300000  -0.53593576
  0.45300000  -0.53593577
  0.45300000  -0.53593578
  0.45300000  -0.53593580
  0.45400000  -0.53640865
  0.45400000  -0.53640867
  0.45400000  -0.53640868
  0.45400000  -0.53640870
  0.45400000  -0.53640871
  0.45400000  -0.53640872
  0.45400000  -0.53640874
  0.45400000  -0.53640875
  0.45400000  -0.53640877
  0.45400000  -0.53640878
  0.45400000  -0.53640880
  0.45400000  -0.53640881
  0.45400000  -0.53640882
  0.45400000  -0.53640884
  0.45400000  -0.53640885
  0.45400000  -0.53640887
  0.45400000  -0.53640888
  0.45400000  -0.53640889
  0.45400000  -0.53640891
  0.45400000  -0.53640892
  0.45400000  -0.53640894
  0.45400000  -0.53640895
  0.45400000  -0.53640896
  0.45400000  -0.53640898
  0.45400000  -0.53640899
  0.45400000  -0.53640900
  0.45400000  -0.53640902
  0.45400000  -0.53640903
  0.45400000  -0.53640904
  0.45400000  -0.53640906
  0.45400000  -0.53640907
  0.45400000  -0.53640909
  0.45400000  -0.53640910
  0.45400000  -0.53640911
  0.45400000  -0.53640913
  0.45400000  -0.53640914
  0.45400000  -0.53640915
  0.45400000  -0.53640917
  0.45400000  -0.53640918
  0.45400000  -0.53640919
  0.45500000  -0.53688096
  0.45500000  -0.53688097
  0.45500000  -0.53688099
  0.45500000  -0.53688100
  0.45500000  -0.53688102
  0.45500000  -0.53688103
  0.45500000  -0.53688104
  0.45500000  -0.53688106
  0.45500000  -0.53688107
  0.45500000  -0.53688109
  0.45500000  -0.53688110
  0.45500000  -0.53688111
  0.45500000  -0.53688113
  0.45500000  -0.53688114
  0.45500000  -0.53688116
  0.45500000  -0.53688117
  0.45500000  -0.53688118
  0.45500000  -0.53688120
  0.45500000  -0.53688121
  0.45500000  -0.53688123
  0.45500000  -0.53688124
  0.45500000  -0.53688125
  0.45500000  -0.53688127
  0.45500000  -0.53688128
  0.45500000  -0.53688130
  0.45500000  -0.53688131
  0.45500000  -0.53688132
  0.45500000  -0.53688134
  0.45500000  -0.53688135
  0.45500000  -0.53688136
  0.45500000  -0.53688138
  0.45500000  -0.53688139
  0.45500000  -0.53688140
  0.45500000  -0.53688142
  0.45500000  -0.53688143
  0.45500000  -0.53688144
  0.45500000  -0.53688146
  0.45500000  -0.53688147
  0.45500000  -0.53688148
  0.45500000  -0.53688150
  0.45600000  -0.53735218
  0.45600000  -0.53735219
  0.45600000  -0.53735221
  0.45600000  -0.53735222
  0.45600000  -0.53735223
  0.45600000  -0.53735225
  0.45600000  -0.53735226
  0.45600000  -0.53735228
  0.45600000  -0.53735229
  0.45600000  -0.53735231
  0.45600000  -0.53735232
  0.45600000  -0.53735233
  0.45600000  -0.53735235
  0.45600000  -0.53735236
  0.45600000  -0.53735238
  0.45600000  -0.53735239
  0.45600000  -0.53735240
  0.45600000  -0.53735242
  0.45600000  -0.53735243
  0.45600000  -0.53735245
  0.45600000  -0.53735246
  0.45600000  -0.53735247
  0.45600000  -0.53735249
  0.45600000  -0.53735250
  0.45600000  -0.53735251
  0.45600000  -0.53735253
  0.45600000  -0.53735254
  0.45600000  -0.53735256
  0.45600000  -0.53735257
  0.45600000  -0.53735258
  0.45600000  -0.53735260
  0.45600000  -0.53735261
  0.45600000  -0.53735262
  0.45600000  -0.53735264
  0.45600000  -0.53735265
  0.45600000  -0.53735266
  0.45600000  -0.53735268
  0.45600000  -0.53735269
  0.45600000  -0.53735270
  0.45600000  -0.53735272
  0.45700000  -0.53782231
  0.45700000  -0.53782233
  0.45700000  -0.53782234
  0.45700000  -0.53782236
  0.45700000  -0.53782237
  0.45700000  -0.53782239
  0.45700000  -0.53782240
  0.45700000  -0.53782241
  0.45700000  -0.53782243
  0.45700000  -0.53782244
  0.45700000  -0.53782246
  0.45700000  -0.53782247
  0.45700000  -0.53782248
  0.45700000  -0.53782250
  0.45700000  -0.53782251
  0.45700000  -0.53782253
  0.45700000  -0.53782254
  0.45700000  -0.53782255
  0.45700000  -0.53782257
  0.45700000  -0.53782258
  0.45700000  -0.53782260
  0.45700000  -0.53782261
  0.45700000  -0.53782262
  0.45700000  -0.53782264
  0.45700000  -0.53782265
  0.45700000  -0.53782267
  0.45700000  -0.53782268
  0.45700000  -0.53782269
  0.45700000  -0.53782271
  0.45700000  -0.53782272
  0.45700000  -0.53782273
  0.45700000  -0.53782275
  0.45700000  -0.53782276
  0.45700000  -0.53782277
  0.45700000  -0.53782279
  0.45700000  -0.53782280
  0.45700000  -0.53782281
  0.45700000  -0.53782283
  0.45700000  -0.53782284
  0.45700000  -0.53782285
  0.45800000  -0.53829137
  0.45800000  -0.53829139
  0.45800000  -0.53829140
  0.45800000  -0.53829142
  0.45800000  -0.53829143
  0.45800000  -0.53829145
  0.45800000  -0.53829146
  0.45800000  -0.53829147
  0.45800000  -0.53829149
  0.45800000  -0.53829150
  0.45800000  -0.53829152
  0.45800000  -0.53829153
  0.45800000  -0.53829154
  0.45800000  -0.53829156
  0.45800000  -0.53829157
  0.45800000  -0.53829159
  0.45800000  -0.53829160
  0.45800000  -0.53829161
  0.45800000  -0.53829163
  0.45800000  -0.53829164
  0.45800000  -0.53829166
  0.45800000  -0.53829167
  0.45800000  -0.53829168
  0.45800000  -0.53829170
  0.45800000  -0.53829171
  0.45800000  -0.53829173
  0.45800000  -0.53829174
  0.45800000  -0.53829175
  0.45800000  -0.53829177
  0.45800000  -0.53829178
  0.45800000  -0.53829179
  0.45800000  -0.53829181
  0.45800000  -0.53829182
  0.45800000  -0.53829183
  0.45800000  -0.53829185
  0.45800000  -0.53829186
  0.45800000  -0.53829187
  0.45800000  -0.53829189
  0.45800000  -0.53829190
  0.45800000  -0.53829191
  0.45900000  -0.53875936
  0.45900000  -0.53875937
  0.45900000  -0.53875939
  0.45900000  -0.53875940
  0.45900000  -0.53875942
  0.45900000  -0.53875943
  0.45900000  -0.53875945
  0.45900000  -0.53875946
  0.45900000  -0.53875947
  0.45900000  -0.53875949
  0.45900000  -0.53875950
  0.45900000  -0.53875952
  0.45900000  -0.53875953
  0.45900000  -0.53875955
  0.45900000  -0.53875956
  0.45900000  -0.53875957
  0.45900000  -0.53875959
  0.45900000  -0.53875960
  0.45900000  -0.53875962
  0.45900000  -0.53875963
  0.45900000  -0.53875964
  0.45900000  -0.53875966
  0.45900000  -0.53875967
  0.45900000  -0.53875968
  0.45900000  -0.53875970
  0.45900000  -0.53875971
  0.45900000  -0.53875973
  0.45900000  -0.53875974
  0.45900000  -0.53875975
  0.45900000  -0.53875977
  0.45900000  -0.53875978
  0.45900000  -0.53875979
  0.45900000  -0.53875981
  0.45900000  -0.53875982
  0.45900000  -0.53875983
  0.45900000  -0.53875985
  0.45900000  -0.53875986
  0.45900000  -0.53875987
  0.45900000  -0.53875989
  0.45900000  -0.53875990
  0.46000000  -0.53922628
  0.46000000  -0.53922629
  0.46000000  -0.53922631
  0.46000000  -0.53922632
  0.46000000  -0.53922634
  0.46000000  -0.53922635
  0.46000000  -0.53922636
  0.46000000  -0.53922638
  0.46000000  -0.53922639
  0.46000000  -0.53922641
  0.46000000  -0.53922642
  0.46000000  -0.53922643
  0.46000000  -0.53922645
  0.46000000  -0.53922646
  0.46000000  -0.53922648
  0.46000000  -0.53922649
  0.46000000  -0.53922650
  0.46000000  -0.53922652
  0.46000000  -0.53922653
  0.46000000  -0.53922655
  0.46000000  -0.53922656
  0.46000000  -0.53922657
  0.46000000  -0.53922659
  0.46000000  -0.53922660
  0.46000000  -0.53922662
  0.46000000  -0.53922663
  0.46000000  -0.53922664
  0.46000000  -0.53922666
  0.46000000  -0.53922667
  0.46000000  -0.53922668
  0.46000000  -0.53922670
  0.46000000  -0.53922671
  0.46000000  -0.53922672
  0.46000000  -0.53922674
  0.46000000  -0.53922675
  0.46000000  -0.53922676
  0.46000000  -0.53922678
  0.46000000  -0.53922679
  0.46000000  -0.53922680
  0.46000000  -0.53922682
  0.46100000  -0.53969213
  0.46100000  -0.53969214
  0.46100000  -0.53969216
  0.46100000  -0.53969217
  0.46100000  -0.53969219
  0.46100000  -0.53969220
  0.46100000  -0.53969222
  0.46100000  -0.53969223
  0.46100000  -0.53969224
  0.46100000  -0.53969226
  0.46100000  -0.53969227
  0.46100000  -0.53969229
  0.46100000  -0.53969230
  0.46100000  -0.53969232
  0.46100000  -0.53969233
  0.46100000  -0.53969234
  0.46100000  -0.53969236
  0.46100000  -0.53969237
  0.46100000  -0.53969239
  0.46100000  -0.53969240
  0.46100000  -0.53969241
  0.46100000  -0.53969243
  0.46100000  -0.53969244
  0.46100000  -0.53969245
  0.46100000  -0.53969247
  0.46100000  -0.53969248
  0.46100000  -0.53969250
  0.46100000  -0.53969251
  0.46100000  -0.53969252
  0.46100000  -0.53969254
  0.46100000  -0.53969255
  0.46100000  -0.53969256
  0.46100000  -0.53969258
  0.46100000  -0.53969259
  0.46100000  -0.53969260
  0.46100000  -0.53969262
  0.46100000  -0.53969263
  0.46100000  -0.53969264
  0.46100000  -0.53969266
  0.46100000  -0.53969267
  0.46200000  -0.54015692
  0.46200000  -0.54015694
  0.46200000  -0.54015695
  0.46200000  -0.54015697
  0.46200000  -0.54015698
  0.46200000  -0.54015699
  0.46200000  -0.54015701
  0.46200000  -0.54015702
  0.46200000  -0.54015704
  0.46200000  -0.54015705
  0.46200000  -0.54015706
  0.46200000  -0.54015708
  0.46200000  -0.54015709
  0.46200000  -0.54015711
  0.46200000  -0.54015712
  0.46200000  -0.54015714
  0.46200000  -0.54015715
  0.46200000  -0.54015716
  0.46200000  -0.54015718
  0.46200000  -0.54015719
  0.46200000  -0.54015720
  0.46200000  -0.54015722
  0.46200000  -0.54015723
  0.46200000  -0.54015725
  0.46200000  -0.54015726
  0.46200000  -0.54015727
  0.46200000  -0.54015729
  0.46200000  -0.54015730
  0.46200000  -0.54015731
  0.46200000  -0.54015733
  0.46200000  -0.54015734
  0.46200000  -0.54015736
  0.46200000  -0.54015737
  0.46200000  -0.54015738
  0.46200000  -0.54015740
  0.46200000  -0.54015741
  0.46200000  -0.54015742
  0.46200000  -0.54015744
  0.46200000  -0.54015745
  0.46200000  -0.54015746
  0.46300000  -0.54062066
  0.46300000  -0.54062067
  0.46300000  -0.54062069
  0.46300000  -0.54062070
  0.46300000  -0.54062071
  0.46300000  -0.54062073
  0.46300000  -0.54062074
  0.46300000  -0.54062076
  0.46300000  -0.54062077
  0.46300000  -0.54062079
  0.46300000  -0.54062080
  0.46300000  -0.54062081
  0.46300000  -0.54062083
  0.46300000  -0.54062084
  0.46300000  -0.54062086
  0.46300000  -0.54062087
  0.46300000  -0.54062088
  0.46300000  -0.54062090
  0.46300000  -0.54062091
  0.46300000  -0.54062093
  0.46300000  -0.54062094
  0.46300000  -0.54062095
  0.46300000  -0.54062097
  0.46300000  -0.54062098
  0.46300000  -0.54062100
  0.46300000  -0.54062101
  0.46300000  -0.54062102
  0.46300000  -0.54062104
  0.46300000  -0.54062105
  0.46300000  -0.54062106
  0.46300000  -0.54062108
  0.46300000  -0.54062109
  0.46300000  -0.54062110
  0.46300000  -0.54062112
  0.46300000  -0.54062113
  0.46300000  -0.54062114
  0.46300000  -0.54062116
  0.46300000  -0.54062117
  0.46300000  -0.54062118
  0.46300000  -0.54062120
  0.46400000  -0.54108334
  0.46400000  -0.54108335
  0.46400000  -0.54108337
  0.46400000  -0.54108338
  0.46400000  -0.54108340
  0.46400000  -0.54108341
  0.46400000  -0.54108343
  0.46400000  -0.54108344
  0.46400000  -0.54108345
  0.46400000  -0.54108347
  0.46400000  -0.54108348
  0.46400000  -0.54108350
  0.46400000  -0.54108351
  0.46400000  -0.54108353
  0.46400000  -0.54108354
  0.46400000  -0.54108355
  0.46400000  -0.54108357
  0.46400000  -0.54108358
  0.46400000  -0.54108360
  0.46400000  -0.54108361
  0.46400000  -0.54108362
  0.46400000  -0.54108364
  0.46400000  -0.54108365
  0.46400000  -0.54108366
  0.46400000  -0.54108368
  0.46400000  -0.54108369
  0.46400000  -0.54108371
  0.46400000  -0.54108372
  0.46400000  -0.54108373
  0.46400000  -0.54108375
  0.46400000  -0.54108376
  0.46400000  -0.54108377
  0.46400000  -0.54108379
  0.46400000  -0.54108380
  0.46400000  -0.54108381
  0.46400000  -0.54108383
  0.46400000  -0.54108384
  0.46400000  -0.54108385
  0.46400000  -0.54108387
  0.46400000  -0.54108388
  0.46500000  -0.54154497
  0.46500000  -0.54154499
  0.46500000  -0.54154500
  0.46500000  -0.54154502
  0.46500000  -0.54154503
  0.46500000  -0.54154505
  0.46500000  -0.54154506
  0.46500000  -0.54154507
  0.46500000  -0.54154509
  0.46500000  -0.54154510
  0.46500000  -0.54154512
  0.46500000  -0.54154513
  0.46500000  -0.54154515
  0.46500000  -0.54154516
  0.46500000  -0.54154517
  0.46500000  -0.54154519
  0.46500000  -0.54154520
  0.46500000  -0.54154522
  0.46500000  -0.54154523
  0.46500000  -0.54154524
  0.46500000  -0.54154526
  0.46500000  -0.54154527
  0.46500000  -0.54154528
  0.46500000  -0.54154530
  0.46500000  -0.54154531
  0.46500000  -0.54154533
  0.46500000  -0.54154534
  0.46500000  -0.54154535
  0.46500000  -0.54154537
  0.46500000  -0.54154538
  0.46500000  -0.54154539
  0.46500000  -0.54154541
  0.46500000  -0.54154542
  0.46500000  -0.54154544
  0.46500000  -0.54154545
  0.46500000  -0.54154546
  0.46500000  -0.54154548
  0.46500000  -0.54154549
  0.46500000  -0.54154550
  0.46500000  -0.54154552
  0.46600000  -0.54200556
  0.46600000  -0.54200558
  0.46600000  -0.54200559
  0.46600000  -0.54200561
  0.46600000  -0.54200562
  0.46600000  -0.54200564
  0.46600000  -0.54200565
  0.46600000  -0.54200566
  0.46600000  -0.54200568
  0.46600000  -0.54200569
  0.46600000  -0.54200571
  0.46600000  -0.54200572
  0.46600000  -0.54200574
  0.46600000  -0.54200575
  0.46600000  -0.54200576
  0.46600000  -0.54200578
  0.46600000  -0.54200579
  0.46600000  -0.54200581
  0.46600000  -0.54200582
  0.46600000  -0.54200583
  0.46600000  -0.54200585
  0.46600000  -0.54200586
  0.46600000  -0.54200588
  0.46600000  -0.54200589
  0.46600000  -0.54200590
  0.46600000  -0.54200592
  0.46600000  -0.54200593
  0.46600000  -0.54200594
  0.46600000  -0.54200596
  0.46600000  -0.54200597
  0.46600000  -0.54200598
  0.46600000  -0.54200600
  0.46600000  -0.54200601
  0.46600000  -0.54200603
  0.46600000  -0.54200604
  0.46600000  -0.54200605
  0.46600000  -0.54200607
  0.46600000  -0.54200608
  0.46600000  -0.54200609
  0.46600000  -0.54200611
  0.46700000  -0.54246511
  0.46700000  -0.54246513
  0.46700000  -0.54246514
  0.46700000  -0.54246516
  0.46700000  -0.54246517
  0.46700000  -0.54246519
  0.46700000  -0.54246520
  0.46700000  -0.54246521
  0.46700000  -0.54246523
  0.46700000  -0.54246524
  0.46700000  -0.54246526
  0.46700000  -0.54246527
  0.46700000  -0.54246529
  0.46700000  -0.54246530
  0.46700000  -0.54246531
  0.46700000  -0.54246533
  0.46700000  -0.54246534
  0.46700000  -0.54246536
  0.46700000  -0.54246537
  0.46700000  -0.54246538
  0.46700000  -0.54246540
  0.46700000  -0.54246541
  0.46700000  -0.54246542
  0.46700000  -0.54246544
  0.46700000  -0.54246545
  0.46700000  -0.54246547
  0.46700000  -0.54246548
  0.46700000  -0.54246549
  0.46700000  -0.54246551
  0.46700000  -0.54246552
  0.46700000  -0.54246553
  0.46700000  -0.54246555
  0.46700000  -0.54246556
  0.46700000  -0.54246558
  0.46700000  -0.54246559
  0.46700000  -0.54246560
  0.46700000  -0.54246562
  0.46700000  -0.54246563
  0.46700000  -0.54246564
  0.46700000  -0.54246566
  0.46800000  -0.54292363
  0.46800000  -0.54292364
  0.46800000  -0.54292366
  0.46800000  -0.54292367
  0.46800000  -0.54292368
  0.46800000  -0.54292370
  0.46800000  -0.54292371
  0.46800000  -0.54292373
  0.46800000  -0.54292374
  0.46800000  -0.54292376
  0.46800000  -0.54292377
  0.46800000  -0.54292378
  0.46800000  -0.54292380
  0.46800000  -0.54292381
  0.46800000  -0.54292383
  0.46800000  -0.54292384
  0.46800000  -0.54292385
  0.46800000  -0.54292387
  0.46800000  -0.54292388
  0.46800000  -0.54292390
  0.46800000  -0.54292391
  0.46800000  -0.54292392
  0.46800000  -0.54292394
  0.46800000  -0.54292395
  0.46800000  -0.54292397
  0.46800000  -0.54292398
  0.46800000  -0.54292399
  0.46800000  -0.54292401
  0.46800000  -0.54292402
  0.46800000  -0.54292403
  0.46800000  -0.54292405
  0.46800000  -0.54292406
  0.46800000  -0.54292408
  0.46800000  -0.54292409
  0.46800000  -0.54292410
  0.46800000  -0.54292412
  0.46800000  -0.54292413
  0.46800000  -0.54292414
  0.46800000  -0.54292416
  0.46800000  -0.54292417
  0.46900000  -0.54338111
  0.46900000  -0.54338112
  0.46900000  -0.54338114
  0.46900000  -0.54338115
  0.46900000  -0.54338117
  0.46900000  -0.54338118
  0.46900000  -0.54338119
  0.46900000  -0.54338121
  0.46900000  -0.54338122
  0.46900000  -0.54338124
  0.46900000  -0.54338125
  0.46900000  -0.54338127
  0.46900000  -0.54338128
  0.46900000  -0.54338129
  0.46900000  -0.54338131
  0.46900000  -0.54338132
  0.46900000  -0.54338134
  0.46900000  -0.54338135
  0.46900000  -0.54338136
  0.46900000  -0.54338138
  0.46900000  -0.54338139
  0.46900000  -0.54338141
  0.46900000  -0.54338142
  0.46900000  -0.54338143
  0.46900000  -0.54338145
  0.46900000  -0.54338146
  0.46900000  -0.54338147
  0.46900000  -0.54338149
  0.46900000  -0.54338150
  0.46900000  -0.54338152
  0.46900000  -0.54338153
  0.46900000  -0.54338154
  0.46900000  -0.54338156
  0.46900000  -0.54338157
  0.46900000  -0.54338158
  0.46900000  -0.54338160
  0.46900000  -0.54338161
  0.46900000  -0.54338162
  0.46900000  -0.54338164
  0.46900000  -0.54338165
  0.47000000  -0.54383756
  0.47000000  -0.54383758
  0.47000000  -0.54383759
  0.47000000  -0.54383760
  0.47000000  -0.54383762
  0.47000000  -0.54383763
  0.47000000  -0.54383765
  0.47000000  -0.54383766
  0.47000000  -0.54383768
  0.47000000  -0.54383769
  0.47000000  -0.54383770
  0.47000000  -0.54383772
  0.47000000  -0.54383773
  0.47000000  -0.54383775
  0.47000000  -0.54383776
  0.47000000  -0.54383778
  0.47000000  -0.54383779
  0.47000000  -0.54383780
  0.47000000  -0.54383782
  0.47000000  -0.54383783
  0.47000000  -0.54383784
  0.47000000  -0.54383786
  0.47000000  -0.54383787
  0.47000000  -0.54383789
  0.47000000  -0.54383790
  0.47000000  -0.54383791
  0.47000000  -0.54383793
  0.47000000  -0.54383794
  0.47000000  -0.54383796
  0.47000000  -0.54383797
  0.47000000  -0.54383798
  0.47000000  -0.54383800
  0.47000000  -0.54383801
  0.47000000  -0.54383802
  0.47000000  -0.54383804
  0.47000000  -0.54383805
  0.47000000  -0.54383806
  0.47000000  -0.54383808
  0.47000000  -0.54383809
  0.47000000  -0.54383810
  0.47100000  -0.54429299
  0.47100000  -0.54429300
  0.47100000  -0.54429302
  0.47100000  -0.54429303
  0.47100000  -0.54429305
  0.47100000  -0.54429306
  0.47100000  -0.54429308
  0.47100000  -0.54429309
  0.47100000  -0.54429310
  0.47100000  -0.54429312
  0.47100000  -0.54429313
  0.47100000  -0.54429315
  0.47100000  -0.54429316
  0.47100000  -0.54429318
  0.47100000  -0.54429319
  0.47100000  -0.54429320
  0.47100000  -0.54429322
  0.47100000  -0.54429323
  0.47100000  -0.54429325
  0.47100000  -0.54429326
  0.47100000  -0.54429327
  0.47100000  -0.54429329
  0.47100000  -0.54429330
  0.47100000  -0.54429332
  0.47100000  -0.54429333
  0.47100000  -0.54429334
  0.47100000  -0.54429336
  0.47100000  -0.54429337
  0.47100000  -0.54429338
  0.47100000  -0.54429340
  0.47100000  -0.54429341
  0.47100000  -0.54429342
  0.47100000  -0.54429344
  0.47100000  -0.54429345
  0.47100000  -0.54429347
  0.47100000  -0.54429348
  0.47100000  -0.54429349
  0.47100000  -0.54429351
  0.47100000  -0.54429352
  0.47100000  -0.54429353
  0.47200000  -0.54474740
  0.47200000  -0.54474741
  0.47200000  -0.54474743
  0.47200000  -0.54474744
  0.47200000  -0.54474746
  0.47200000  -0.54474747
  0.47200000  -0.54474748
  0.47200000  -0.54474750
  0.47200000  -0.54474751
  0.47200000  -0.54474753
  0.47200000  -0.54474754
  0.47200000  -0.54474756
  0.47200000  -0.54474757
  0.47200000  -0.54474758
  0.47200000  -0.54474760
  0.47200000  -0.54474761
  0.47200000  -0.54474763
  0.47200000  -0.54474764
  0.47200000  -0.54474765
  0.47200000  -0.54474767
  0.47200000  -0.54474768
  0.47200000  -0.54474770
  0.47200000  -0.54474771
  0.47200000  -0.54474772
  0.47200000  -0.54474774
  0.47200000  -0.54474775
  0.47200000  -0.54474776
  0.47200000  -0.54474778
  0.47200000  -0.54474779
  0.47200000  -0.54474781
  0.47200000  -0.54474782
  0.47200000  -0.54474783
  0.47200000  -0.54474785
  0.47200000  -0.54474786
  0.47200000  -0.54474787
  0.47200000  -0.54474789
  0.47200000  -0.54474790
  0.47200000  -0.54474791
  0.47200000  -0.54474793
  0.47200000  -0.54474794
  0.47300000  -0.54520079
  0.47300000  -0.54520080
  0.47300000  -0.54520082
  0.47300000  -0.54520083
  0.47300000  -0.54520085
  0.47300000  -0.54520086
  0.47300000  -0.54520088
  0.47300000  -0.54520089
  0.47300000  -0.54520090
  0.47300000  -0.54520092
  0.47300000  -0.54520093
  0.47300000  -0.54520095
  0.47300000  -0.54520096
  0.47300000  -0.54520098
  0.47300000  -0.54520099
  0.47300000  -0.54520100
  0.47300000  -0.54520102
  0.47300000  -0.54520103
  0.47300000  -0.54520105
  0.47300000  -0.54520106
  0.47300000  -0.54520107
  0.47300000  -0.54520109
  0.47300000  -0.54520110
  0.47300000  -0.54520111
  0.47300000  -0.54520113
  0.47300000  -0.54520114
  0.47300000  -0.54520116
  0.47300000  -0.54520117
  0.47300000  -0.54520118
  0.47300000  -0.54520120
  0.47300000  -0.54520121
  0.47300000  -0.54520122
  0.47300000  -0.54520124
  0.47300000  -0.54520125
  0.47300000  -0.54520127
  0.47300000  -0.54520128
  0.47300000  -0.54520129
  0.47300000  -0.54520131
  0.47300000  -0.54520132
  0.47300000  -0.54520133
  0.47400000  -0.54565317
  0.47400000  -0.54565318
  0.47400000  -0.54565320
  0.47400000  -0.54565321
  0.47400000  -0.54565323
  0.47400000  -0.54565324
  0.47400000  -0.54565325
  0.47400000  -0.54565327
  0.47400000  -0.54565328
  0.47400000  -0.54565330
  0.47400000  -0.54565331
  0.47400000  -0.54565333
  0.47400000  -0.54565334
  0.47400000  -0.54565335
  0.47400000  -0.54565337
  0.47400000  -0.54565338
  0.47400000  -0.54565340
  0.47400000  -0.54565341
  0.47400000  -0.54565342
  0.47400000  -0.54565344
  0.47400000  -0.54565345
  0.47400000  -0.54565347
  0.47400000  -0.54565348
  0.47400000  -0.54565349
  0.47400000  -0.54565351
  0.47400000  -0.54565352
  0.47400000  -0.54565353
  0.47400000  -0.54565355
  0.47400000  -0.54565356
  0.47400000  -0.54565358
  0.47400000  -0.54565359
  0.47400000  -0.54565360
  0.47400000  -0.54565362
  0.47400000  -0.54565363
  0.47400000  -0.54565364
  0.47400000  -0.54565366
  0.47400000  -0.54565367
  0.47400000  -0.54565368
  0.47400000  -0.54565370
  0.47400000  -0.54565371
  0.47500000  -0.54610454
  0.47500000  -0.54610455
  0.47500000  -0.54610457
  0.47500000  -0.54610458
  0.47500000  -0.54610460
  0.47500000  -0.54610461
  0.47500000  -0.54610462
  0.47500000  -0.54610464
  0.47500000  -0.54610465
  0.47500000  -0.54610467
  0.47500000  -0.54610468
  0.47500000  -0.54610470
  0.47500000  -0.54610471
  0.47500000  -0.54610472
  0.47500000  -0.54610474
  0.47500000  -0.54610475
  0.47500000  -0.54610477
  0.47500000  -0.54610478
  0.47500000  -0.54610479
  0.47500000  -0.54610481
  0.47500000  -0.54610482
  0.47500000  -0.54610484
  0.47500000  -0.54610485
  0.47500000  -0.54610486
  0.47500000  -0.54610488
  0.47500000  -0.54610489
  0.47500000  -0.54610491
  0.47500000  -0.54610492
  0.47500000  -0.54610493
  0.47500000  -0.54610495
  0.47500000  -0.54610496
  0.47500000  -0.54610497
  0.47500000  -0.54610499
  0.47500000  -0.54610500
  0.47500000  -0.54610501
  0.47500000  -0.54610503
  0.47500000  -0.54610504
  0.47500000  -0.54610505
  0.47500000  -0.54610507
  0.47500000  -0.54610508
  0.47600000  -0.54655490
  0.47600000  -0.54655492
  0.47600000  -0.54655493
  0.47600000  -0.54655495
  0.47600000  -0.54655496
  0.47600000  -0.54655497
  0.47600000  -0.54655499
  0.47600000  -0.54655500
  0.47600000  -0.54655502
  0.47600000  -0.54655503
  0.47600000  -0.54655505
  0.47600000  -0.54655506
  0.47600000  -0.54655507
  0.47600000  -0.54655509
  0.47600000  -0.54655510
  0.47600000  -0.54655512
  0.47600000  -0.54655513
  0.47600000  -0.54655515
  0.47600000  -0.54655516
  0.47600000  -0.54655517
  0.47600000  -0.54655519
  0.47600000  -0.54655520
  0.47600000  -0.54655521
  0.47600000  -0.54655523
  0.47600000  -0.54655524
  0.47600000  -0.54655526
  0.47600000  -0.54655527
  0.47600000  -0.54655528
  0.47600000  -0.54655530
  0.47600000  -0.54655531
  0.47600000  -0.54655532
  0.47600000  -0.54655534
  0.47600000  -0.54655535
  0.47600000  -0.54655537
  0.47600000  -0.54655538
  0.47600000  -0.54655539
  0.47600000  -0.54655541
  0.47600000  -0.54655542
  0.47600000  -0.54655543
  0.47600000  -0.54655545
  0.47700000  -0.54700427
  0.47700000  -0.54700428
  0.47700000  -0.54700430
  0.47700000  -0.54700431
  0.47700000  -0.54700432
  0.47700000  -0.54700434
  0.47700000  -0.54700435
  0.47700000  -0.54700437
  0.47700000  -0.54700438
  0.47700000  -0.54700440
  0.47700000  -0.54700441
  0.47700000  -0.54700442
  0.47700000  -0.54700444
  0.47700000  -0.54700445
  0.47700000  -0.54700447
  0.47700000  -0.54700448
  0.47700000  -0.54700449
  0.47700000  -0.54700451
  0.47700000  -0.54700452
  0.47700000  -0.54700454
  0.47700000  -0.54700455
  0.47700000  -0.54700456
  0.47700000  -0.54700458
  0.47700000  -0.54700459
  0.47700000  -0.54700461
  0.47700000  -0.54700462
  0.47700000  -0.54700463
  0.47700000  -0.54700465
  0.47700000  -0.54700466
  0.47700000  -0.54700468
  0.47700000  -0.54700469
  0.47700000  -0.54700470
  0.47700000  -0.54700472
  0.47700000  -0.54700473
  0.47700000  -0.54700474
  0.47700000  -0.54700476
  0.47700000  -0.54700477
  0.47700000  -0.54700478
  0.47700000  -0.54700480
  0.47700000  -0.54700481
  0.47800000  -0.54745263
  0.47800000  -0.54745265
  0.47800000  -0.54745266
  0.47800000  -0.54745268
  0.47800000  -0.54745269
  0.47800000  -0.54745271
  0.47800000  -0.54745272
  0.47800000  -0.54745273
  0.47800000  -0.54745275
  0.47800000  -0.54745276
  0.47800000  -0.54745278
  0.47800000  -0.54745279
  0.47800000  -0.54745281
  0.47800000  -0.54745282
  0.47800000  -0.54745283
  0.47800000  -0.54745285
  0.47800000  -0.54745286
  0.47800000  -0.54745288
  0.47800000  -0.54745289
  0.47800000  -0.54745290
  0.47800000  -0.54745292
  0.47800000  -0.54745293
  0.47800000  -0.54745295
  0.47800000  -0.54745296
  0.47800000  -0.54745297
  0.47800000  -0.54745299
  0.47800000  -0.54745300
  0.47800000  -0.54745301
  0.47800000  -0.54745303
  0.47800000  -0.54745304
  0.47800000  -0.54745306
  0.47800000  -0.54745307
  0.47800000  -0.54745308
  0.47800000  -0.54745310
  0.47800000  -0.54745311
  0.47800000  -0.54745312
  0.47800000  -0.54745314
  0.47800000  -0.54745315
  0.47800000  -0.54745316
  0.47800000  -0.54745318
  0.47900000  -0.54790001
  0.47900000  -0.54790002
  0.47900000  -0.54790003
  0.47900000  -0.54790005
  0.47900000  -0.54790006
  0.47900000  -0.54790008
  0.47900000  -0.54790009
  0.47900000  -0.54790011
  0.47900000  -0.54790012
  0.47900000  -0.54790014
  0.47900000  -0.54790015
  0.47900000  -0.54790016
  0.47900000  -0.54790018
  0.47900000  -0.54790019
  0.47900000  -0.54790021
  0.47900000  -0.54790022
  0.47900000  -0.54790023
  0.47900000  -0.54790025
  0.47900000  -0.54790026
  0.47900000  -0.54790028
  0.47900000  -0.54790029
  0.47900000  -0.54790030
  0.47900000  -0.54790032
  0.47900000  -0.54790033
  0.47900000  -0.54790035
  0.47900000  -0.54790036
  0.47900000  -0.54790037
  0.47900000  -0.54790039
  0.47900000  -0.54790040
  0.47900000  -0.54790041
  0.47900000  -0.54790043
  0.47900000  -0.54790044
  0.47900000  -0.54790046
  0.47900000  -0.54790047
  0.47900000  -0.54790048
  0.47900000  -0.54790050
  0.47900000  -0.54790051
  0.47900000  -0.54790052
  0.47900000  -0.54790054
  0.47900000  -0.54790055
  0.48000000  -0.54834639
  0.48000000  -0.54834640
  0.48000000  -0.54834642
  0.48000000  -0.54834643
  0.48000000  -0.54834645
  0.48000000  -0.54834646
  0.48000000  -0.54834648
  0.48000000  -0.54834649
  0.48000000  -0.54834650
  0.48000000  -0.54834652
  0.48000000  -0.54834653
  0.48000000  -0.54834655
  0.48000000  -0.54834656
  0.48000000  -0.54834657
  0.48000000  -0.54834659
  0.48000000  -0.54834660
  0.48000000  -0.54834662
  0.48000000  -0.54834663
  0.48000000  -0.54834665
  0.48000000  -0.54834666
  0.48000000  -0.54834667
  0.48000000  -0.54834669
  0.48000000  -0.54834670
  0.48000000  -0.54834671
  0.48000000  -0.54834673
  0.48000000  -0.54834674
  0.48000000  -0.54834676
  0.48000000  -0.54834677
  0.48000000  -0.54834678
  0.48000000  -0.54834680
  0.48000000  -0.54834681
  0.48000000  -0.54834682
  0.48000000  -0.54834684
  0.48000000  -0.54834685
  0.48000000  -0.54834687
  0.48000000  -0.54834688
  0.48000000  -0.54834689
  0.48000000  -0.54834691
  0.48000000  -0.54834692
  0.48000000  -0.54834693
  0.48100000  -0.54879179
  0.48100000  -0.54879180
  0.48100000  -0.54879181
  0.48100000  -0.54879183
  0.48100000  -0.54879184
  0.48100000  -0.54879186
  0.48100000  -0.54879187
  0.48100000  -0.54879189
  0.48100000  -0.54879190
  0.48100000  -0.54879191
  0.48100000  -0.54879193
  0.48100000  -0.54879194
  0.48100000  -0.54879196
  0.48100000  -0.54879197
  0.48100000  -0.54879199
  0.48100000  -0.54879200
  0.48100000  -0.54879201
  0.48100000  -0.54879203
  0.48100000  -0.54879204
  0.48100000  -0.54879206
  0.48100000  -0.54879207
  0.48100000  -0.54879208
  0.48100000  -0.54879210
  0.48100000  -0.54879211
  0.48100000  -0.54879213
  0.48100000  -0.54879214
  0.48100000  -0.54879215
  0.48100000  -0.54879217
  0.48100000  -0.54879218
  0.48100000  -0.54879219
  0.48100000  -0.54879221
  0.48100000  -0.54879222
  0.48100000  -0.54879224
  0.48100000  -0.54879225
  0.48100000  -0.54879226
  0.48100000  -0.54879228
  0.48100000  -0.54879229
  0.48100000  -0.54879230
  0.48100000  -0.54879232
  0.48100000  -0.54879233
  0.48200000  -0.54923620
  0.48200000  -0.54923621
  0.48200000  -0.54923623
  0.48200000  -0.54923624
  0.48200000  -0.54923626
  0.48200000  -0.54923627
  0.48200000  -0.54923629
  0.48200000  -0.54923630
  0.48200000  -0.54923631
  0.48200000  -0.54923633
  0.48200000  -0.54923634
  0.48200000  -0.54923636
  0.48200000  -0.54923637
  0.48200000  -0.54923639
  0.48200000  -0.54923640
  0.48200000  -0.54923641
  0.48200000  -0.54923643
  0.48200000  -0.54923644
  0.48200000  -0.54923646
  0.48200000  -0.54923647
  0.48200000  -0.54923648
  0.48200000  -0.54923650
  0.48200000  -0.54923651
  0.48200000  -0.54923653
  0.48200000  -0.54923654
  0.48200000  -0.54923655
  0.48200000  -0.54923657
  0.48200000  -0.54923658
  0.48200000  -0.54923660
  0.48200000  -0.54923661
  0.48200000  -0.54923662
  0.48200000  -0.54923664
  0.48200000  -0.54923665
  0.48200000  -0.54923666
  0.48200000  -0.54923668
  0.48200000  -0.54923669
  0.48200000  -0.54923670
  0.48200000  -0.54923672
  0.48200000  -0.54923673
  0.48200000  -0.54923674
  0.48300000  -0.54967964
  0.48300000  -0.54967965
  0.48300000  -0.54967966
  0.48300000  -0.54967968
  0.48300000  -0.54967969
  0.48300000  -0.54967971
  0.48300000  -0.54967972
  0.48300000  -0.54967974
  0.48300000  -0.54967975
  0.48300000  -0.54967976
  0.48300000  -0.54967978
  0.48300000  -0.54967979
  0.48300000  -0.54967981
  0.48300000  -0.54967982
  0.48300000  -0.54967984
  0.48300000  -0.54967985
  0.48300000  -0.54967986
  0.48300000  -0.54967988
  0.48300000  -0.54967989
  0.48300000  -0.54967991
  0.48300000  -0.54967992
  0.48300000  -0.54967993
  0.48300000  -0.54967995
  0.48300000  -0.54967996
  0.48300000  -0.54967998
  0.48300000  -0.54967999
  0.48300000  -0.54968000
  0.48300000  -0.54968002
  0.48300000  -0.54968003
  0.48300000  -0.54968004
  0.48300000  -0.54968006
  0.48300000  -0.54968007
  0.48300000  -0.54968009
  0.48300000  -0.54968010
  0.48300000  -0.54968011
  0.48300000  -0.54968013
  0.48300000  -0.54968014
  0.48300000  -0.54968015
  0.48300000  -0.54968017
  0.48300000  -0.54968018
  0.48400000  -0.55012210
  0.48400000  -0.55012211
  0.48400000  -0.55012212
  0.48400000  -0.55012214
  0.48400000  -0.55012215
  0.48400000  -0.55012217
  0.48400000  -0.55012218
  0.48400000  -0.55012220
  0.48400000  -0.55012221
  0.48400000  -0.55012223
  0.48400000  -0.55012224
  0.48400000  -0.55012225
  0.48400000  -0.55012227
  0.48400000  -0.55012228
  0.48400000  -0.55012230
  0.48400000  -0.55012231
  0.48400000  -0.55012232
  0.48400000  -0.55012234
  0.48400000  -0.55012235
  0.48400000  -0.55012237
  0.48400000  -0.55012238
  0.48400000  -0.55012239
  0.48400000  -0.55012241
  0.48400000  -0.55012242
  0.48400000  -0.55012244
  0.48400000  -0.55012245
  0.48400000  -0.55012246
  0.48400000  -0.55012248
  0.48400000  -0.55012249
  0.48400000  -0.55012251
  0.48400000  -0.55012252
  0.48400000  -0.55012253
  0.48400000  -0.55012255
  0.48400000  -0.55012256
  0.48400000  -0.55012257
  0.48400000  -0.55012259
  0.48400000  -0.55012260
  0.48400000  -0.55012261
  0.48400000  -0.55012263
  0.48400000  -0.55012264
  0.48500000  -0.55056358
  0.48500000  -0.55056360
  0.48500000  -0.55056361
  0.48500000  -0.55056363
  0.48500000  -0.55056364
  0.48500000  -0.55056366
  0.48500000  -0.55056367
  0.48500000  -0.55056369
  0.48500000  -0.55056370
  0.48500000  -0.55056371
  0.48500000  -0.55056373
  0.48500000  -0.55056374
  0.48500000  -0.55056376
  0.48500000  -0.55056377
  0.48500000  -0.55056379
  0.48500000  -0.55056380
  0.48500000  -0.55056381
  0.48500000  -0.55056383
  0.48500000  -0.55056384
  0.48500000  -0.55056386
  0.48500000  -0.55056387
  0.48500000  -0.55056388
  0.48500000  -0.55056390
  0.48500000  -0.55056391
  0.48500000  -0.55056393
  0.48500000  -0.55056394
  0.48500000  -0.55056395
  0.48500000  -0.55056397
  0.48500000  -0.55056398
  0.48500000  -0.55056399
  0.48500000  -0.55056401
  0.48500000  -0.55056402
  0.48500000  -0.55056404
  0.48500000  -0.55056405
  0.48500000  -0.55056406
  0.48500000  -0.55056408
  0.48500000  -0.55056409
  0.48500000  -0.55056410
  0.48500000  -0.55056412
  0.48500000  -0.55056413
  0.48600000  -0.55100411
  0.48600000  -0.55100412
  0.48600000  -0.55100413
  0.48600000  -0.55100415
  0.48600000  -0.55100416
  0.48600000  -0.55100418
  0.48600000  -0.55100419
  0.48600000  -0.55100421
  0.48600000  -0.55100422
  0.48600000  -0.55100424
  0.48600000  -0.55100425
  0.48600000  -0.55100426
  0.48600000  -0.55100428
  0.48600000  -0.55100429
  0.48600000  -0.55100431
  0.48600000  -0.55100432
  0.48600000  -0.55100433
  0.48600000  -0.55100435
  0.48600000  -0.55100436
  0.48600000  -0.55100438
  0.48600000  -0.55100439
  0.48600000  -0.55100440
  0.48600000  -0.55100442
  0.48600000  -0.55100443
  0.48600000  -0.55100445
  0.48600000  -0.55100446
  0.48600000  -0.55100447
  0.48600000  -0.55100449
  0.48600000  -0.55100450
  0.48600000  -0.55100452
  0.48600000  -0.55100453
  0.48600000  -0.55100454
  0.48600000  -0.55100456
  0.48600000  -0.55100457
  0.48600000  -0.55100458
  0.48600000  -0.55100460
  0.48600000  -0.55100461
  0.48600000  -0.55100462
  0.48600000  -0.55100464
  0.48600000  -0.55100465
  0.48700000  -0.55144366
  0.48700000  -0.55144368
  0.48700000  -0.55144369
  0.48700000  -0.55144371
  0.48700000  -0.55144372
  0.48700000  -0.55144373
  0.48700000  -0.55144375
  0.48700000  -0.55144376
  0.48700000  -0.55144378
  0.48700000  -0.55144379
  0.48700000  -0.55144381
  0.48700000  -0.55144382
  0.48700000  -0.55144383
  0.48700000  -0.55144385
  0.48700000  -0.55144386
  0.48700000  -0.55144388
  0.48700000  -0.55144389
  0.48700000  -0.55144391
  0.48700000  -0.55144392
  0.48700000  -0.55144393
  0.48700000  -0.55144395
  0.48700000  -0.55144396
  0.48700000  -0.55144398
  0.48700000  -0.55144399
  0.48700000  -0.55144400
  0.48700000  -0.55144402
  0.48700000  -0.55144403
  0.48700000  -0.55144404
  0.48700000  -0.55144406
  0.48700000  -0.55144407
  0.48700000  -0.55144409
  0.48700000  -0.55144410
  0.48700000  -0.55144411
  0.48700000  -0.55144413
  0.48700000  -0.55144414
  0.48700000  -0.55144415
  0.48700000  -0.55144417
  0.48700000  -0.55144418
  0.48700000  -0.55144419
  0.48700000  -0.55144421
  0.48800000  -0.55188226
  0.48800000  -0.55188227
  0.48800000  -0.55188229
  0.48800000  -0.55188230
  0.48800000  -0.55188232
  0.48800000  -0.55188233
  0.48800000  -0.55188235
  0.48800000  -0.55188236
  0.48800000  -0.55188237
  0.48800000  -0.55188239
  0.48800000  -0.55188240
  0.48800000  -0.55188242
  0.48800000  -0.55188243
  0.48800000  -0.55188245
  0.48800000  -0.55188246
  0.48800000  -0.55188247
  0.48800000  -0.55188249
  0.48800000  -0.55188250
  0.48800000  -0.55188252
  0.48800000  -0.55188253
  0.48800000  -0.55188254
  0.48800000  -0.55188256
  0.48800000  -0.55188257
  0.48800000  -0.55188259
  0.48800000  -0.55188260
  0.48800000  -0.55188261
  0.48800000  -0.55188263
  0.48800000  -0.55188264
  0.48800000  -0.55188265
  0.48800000  -0.55188267
  0.48800000  -0.55188268
  0.48800000  -0.55188270
  0.48800000  -0.55188271
  0.48800000  -0.55188272
  0.48800000  -0.55188274
  0.48800000  -0.55188275
  0.48800000  -0.55188276
  0.48800000  -0.55188278
  0.48800000  -0.55188279
  0.48800000  -0.55188280
  0.48900000  -0.55231990
  0.48900000  -0.55231991
  0.48900000  -0.55231993
  0.48900000  -0.55231994
  0.48900000  -0.55231996
  0.48900000  -0.55231997
  0.48900000  -0.55231998
  0.48900000  -0.55232000
  0.48900000  -0.55232001
  0.48900000  -0.55232003
  0.48900000  -0.55232004
  0.48900000  -0.55232006
  0.48900000  -0.55232007
  0.48900000  -0.55232008
  0.48900000  -0.55232010
  0.48900000  -0.55232011
  0.48900000  -0.55232013
  0.48900000  -0.55232014
  0.48900000  -0.55232015
  0.48900000  -0.55232017
  0.48900000  -0.55232018
  0.48900000  -0.55232020
  0.48900000  -0.55232021
  0.48900000  -0.55232022
  0.48900000  -0.55232024
  0.48900000  -0.55232025
  0.48900000  -0.55232027
  0.48900000  -0.55232028
  0.48900000  -0.55232029
  0.48900000  -0.55232031
  0.48900000  -0.55232032
  0.48900000  -0.55232034
  0.48900000  -0.55232035
  0.48900000  -0.55232036
  0.48900000  -0.55232038
  0.48900000  -0.55232039
  0.48900000  -0.55232040
  0.48900000  -0.55232042
  0.48900000  -0.55232043
  0.48900000  -0.55232044
  0.49000000  -0.55275658
  0.49000000  -0.55275660
  0.49000000  -0.55275661
  0.49000000  -0.55275663
  0.49000000  -0.55275664
  0.49000000  -0.55275666
  0.49000000  -0.55275667
  0.49000000  -0.55275668
  0.49000000  -0.55275670
  0.49000000  -0.55275671
  0.49000000  -0.55275673
  0.49000000  -0.55275674
  0.49000000  -0.55275676
  0.49000000  -0.55275677
  0.49000000  -0.55275678
  0.49000000  -0.55275680
  0.49000000  -0.55275681
  0.49000000  -0.55275683
  0.49000000  -0.55275684
  0.49000000  -0.55275685
  0.49000000  -0.55275687
  0.49000000  -0.55275688
  0.49000000  -0.55275690
  0.49000000  -0.55275691
  0.49000000  -0.55275692
  0.49000000  -0.55275694
  0.49000000  -0.55275695
  0.49000000  -0.55275697
  0.49000000  -0.55275698
  0.49000000  -0.55275699
  0.49000000  -0.55275701
  0.49000000  -0.55275702
  0.49000000  -0.55275703
  0.49000000  -0.55275705
  0.49000000  -0.55275706
  0.49000000  -0.55275708
  0.49000000  -0.55275709
  0.49000000  -0.55275710
  0.49000000  -0.55275712
  0.49000000  -0.55275713
  0.49100000  -0.55319232
  0.49100000  -0.55319233
  0.49100000  -0.55319235
  0.49100000  -0.55319236
  0.49100000  -0.55319238
  0.49100000  -0.55319239
  0.49100000  -0.55319241
  0.49100000  -0.55319242
  0.49100000  -0.55319243
  0.49100000  -0.55319245
  0.49100000  -0.55319246
  0.49100000  -0.55319248
  0.49100000  -0.55319249
  0.49100000  -0.55319251
  0.49100000  -0.55319252
  0.49100000  -0.55319253
  0.49100000  -0.55319255
  0.49100000  -0.55319256
  0.49100000  -0.55319258
  0.49100000  -0.55319259
  0.49100000  -0.55319260
  0.49100000  -0.55319262
  0.49100000  -0.55319263
  0.49100000  -0.55319265
  0.49100000  -0.55319266
  0.49100000  -0.55319267
  0.49100000  -0.55319269
  0.49100000  -0.55319270
  0.49100000  -0.55319272
  0.49100000  -0.55319273
  0.49100000  -0.55319274
  0.49100000  -0.55319276
  0.49100000  -0.55319277
  0.49100000  -0.55319278
  0.49100000  -0.55319280
  0.49100000  -0.55319281
  0.49100000  -0.55319282
  0.49100000  -0.55319284
  0.49100000  -0.55319285
  0.49100000  -0.55319286
  0.49200000  -0.55362711
  0.49200000  -0.55362712
  0.49200000  -0.55362714
  0.49200000  -0.55362715
  0.49200000  -0.55362717
  0.49200000  -0.55362718
  0.49200000  -0.55362719
  0.49200000  -0.55362721
  0.49200000  -0.55362722
  0.49200000  -0.55362724
  0.49200000  -0.55362725
  0.49200000  -0.55362727
  0.49200000  -0.55362728
  0.49200000  -0.55362729
  0.49200000  -0.55362731
  0.49200000  -0.55362732
  0.49200000  -0.55362734
  0.49200000  -0.55362735
  0.49200000  -0.55362737
  0.49200000  -0.55362738
  0.49200000  -0.55362739
  0.49200000  -0.55362741
  0.49200000  -0.55362742
  0.49200000  -0.55362744
  0.49200000  -0.55362745
  0.49200000  -0.55362746
  0.49200000  -0.55362748
  0.49200000  -0.55362749
  0.49200000  -0.55362750
  0.49200000  -0.55362752
  0.49200000  -0.55362753
  0.49200000  -0.55362755
  0.49200000  -0.55362756
  0.49200000  -0.55362757
  0.49200000  -0.55362759
  0.49200000  -0.55362760
  0.49200000  -0.55362761
  0.49200000  -0.55362763
  0.49200000  -0.55362764
  0.49200000  -0.55362765
  0.49300000  -0.55406095
  0.49300000  -0.55406097
  0.49300000  -0.55406098
  0.49300000  -0.55406100
  0.49300000  -0.55406101
  0.49300000  -0.55406103
  0.49300000  -0.55406104
  0.49300000  -0.55406105
  0.49300000  -0.55406107
  0.49300000  -0.55406108
  0.49300000  -0.55406110
  0.49300000  -0.55406111
  0.49300000  -0.55406113
  0.49300000  -0.55406114
  0.49300000  -0.55406115
  0.49300000  -0.55406117
  0.49300000  -0.55406118
  0.49300000  -0.55406120
  0.49300000  -0.55406121
  0.49300000  -0.55406123
  0.49300000  -0.55406124
  0.49300000  -0.55406125
  0.49300000  -0.55406127
  0.49300000  -0.55406128
  0.49300000  -0.55406129
  0.49300000  -0.55406131
  0.49300000  -0.55406132
  0.49300000  -0.55406134
  0.49300000  -0.55406135
  0.49300000  -0.55406136
  0.49300000  -0.55406138
  0.49300000  -0.55406139
  0.49300000  -0.55406141
  0.49300000  -0.55406142
  0.49300000  -0.55406143
  0.49300000  -0.55406145
  0.49300000  -0.55406146
  0.49300000  -0.55406147
  0.49300000  -0.55406149
  0.49300000  -0.55406150
  0.49400000  -0.55449386
  0.49400000  -0.55449387
  0.49400000  -0.55449389
  0.49400000  -0.55449390
  0.49400000  -0.55449392
  0.49400000  -0.55449393
  0.49400000  -0.55449395
  0.49400000  -0.55449396
  0.49400000  -0.55449398
  0.49400000  -0.55449399
  0.49400000  -0.55449400
  0.49400000  -0.55449402
  0.49400000  -0.55449403
  0.49400000  -0.55449405
  0.49400000  -0.55449406
  0.49400000  -0.55449408
  0.49400000  -0.55449409
  0.49400000  -0.55449410
  0.49400000  -0.55449412
  0.49400000  -0.55449413
  0.49400000  -0.55449415
  0.49400000  -0.55449416
  0.49400000  -0.55449417
  0.49400000  -0.55449419
  0.49400000  -0.55449420
  0.49400000  -0.55449422
  0.49400000  -0.55449423
  0.49400000  -0.55449424
  0.49400000  -0.55449426
  0.49400000  -0.55449427
  0.49400000  -0.55449428
  0.49400000  -0.55449430
  0.49400000  -0.55449431
  0.49400000  -0.55449433
  0.49400000  -0.55449434
  0.49400000  -0.55449435
  0.49400000  -0.55449437
  0.49400000  -0.55449438
  0.49400000  -0.55449439
  0.49400000  -0.55449441
  0.49500000  -0.55492583
  0.49500000  -0.55492584
  0.49500000  -0.55492586
  0.49500000  -0.55492587
  0.49500000  -0.55492589
  0.49500000  -0.55492590
  0.49500000  -0.55492592
  0.49500000  -0.55492593
  0.49500000  -0.55492595
  0.49500000  -0.55492596
  0.49500000  -0.55492597
  0.49500000  -0.55492599
  0.49500000  -0.55492600
  0.49500000  -0.55492602
  0.49500000  -0.55492603
  0.49500000  -0.55492605
  0.49500000  -0.55492606
  0.49500000  -0.55492607
  0.49500000  -0.55492609
  0.49500000  -0.55492610
  0.49500000  -0.55492612
  0.49500000  -0.55492613
  0.49500000  -0.55492614
  0.49500000  -0.55492616
  0.49500000  -0.55492617
  0.49500000  -0.55492619
  0.49500000  -0.55492620
  0.49500000  -0.55492621
  0.49500000  -0.55492623
  0.49500000  -0.55492624
  0.49500000  -0.55492625
  0.49500000  -0.55492627
  0.49500000  -0.55492628
  0.49500000  -0.55492630
  0.49500000  -0.55492631
  0.49500000  -0.55492632
  0.49500000  -0.55492634
  0.49500000  -0.55492635
  0.49500000  -0.55492636
  0.49500000  -0.55492638
  0.49600000  -0.55535687
  0.49600000  -0.55535688
  0.49600000  -0.55535690
  0.49600000  -0.55535691
  0.49600000  -0.55535693
  0.49600000  -0.55535694
  0.49600000  -0.55535695
  0.49600000  -0.55535697
  0.49600000  -0.55535698
  0.49600000  -0.55535700
  0.49600000  -0.55535701
  0.49600000  -0.55535703
  0.49600000  -0.55535704
  0.49600000  -0.55535705
  0.49600000  -0.55535707
  0.49600000  -0.55535708
  0.49600000  -0.55535710
  0.49600000  -0.55535711
  0.49600000  -0.55535712
  0.49600000  -0.55535714
  0.49600000  -0.55535715
  0.49600000  -0.55535717
  0.49600000  -0.55535718
  0.49600000  -0.55535719
  0.49600000  -0.55535721
  0.49600000  -0.55535722
  0.49600000  -0.55535724
  0.49600000  -0.55535725
  0.49600000  -0.55535726
  0.49600000  -0.55535728
  0.49600000  -0.55535729
  0.49600000  -0.55535731
  0.49600000  -0.55535732
  0.49600000  -0.55535733
  0.49600000  -0.55535735
  0.49600000  -0.55535736
  0.49600000  -0.55535737
  0.49600000  -0.55535739
  0.49600000  -0.55535740
  0.49600000  -0.55535741
  0.49700000  -0.55578698
  0.49700000  -0.55578699
  0.49700000  -0.55578700
  0.49700000  -0.55578702
  0.49700000  -0.55578703
  0.49700000  -0.55578705
  0.49700000  -0.55578706
  0.49700000  -0.55578708
  0.49700000  -0.55578709
  0.49700000  -0.55578711
  0.49700000  -0.55578712
  0.49700000  -0.55578713
  0.49700000  -0.55578715
  0.49700000  -0.55578716
  0.49700000  -0.55578718
  0.49700000  -0.55578719
  0.49700000  -0.55578720
  0.49700000  -0.55578722
  0.49700000  -0.55578723
  0.49700000  -0.55578725
  0.49700000  -0.55578726
  0.49700000  -0.55578728
  0.49700000  -0.55578729
  0.49700000  -0.55578730
  0.49700000  -0.55578732
  0.49700000  -0.55578733
  0.49700000  -0.55578734
  0.49700000  -0.55578736
  0.49700000  -0.55578737
  0.49700000  -0.55578739
  0.49700000  -0.55578740
  0.49700000  -0.55578741
  0.49700000  -0.55578743
  0.49700000  -0.55578744
  0.49700000  -0.55578745
  0.49700000  -0.55578747
  0.49700000  -0.55578748
  0.49700000  -0.55578750
  0.49700000  -0.55578751
  0.49700000  -0.55578752
  0.49800000  -0.55621616
  0.49800000  -0.55621617
  0.49800000  -0.55621619
  0.49800000  -0.55621620
  0.49800000  -0.55621622
  0.49800000  -0.55621623
  0.49800000  -0.55621624
  0.49800000  -0.55621626
  0.49800000  -0.55621627
  0.49800000  -0.55621629
  0.49800000  -0.55621630
  0.49800000  -0.55621632
  0.49800000  -0.55621633
  0.49800000  -0.55621634
  0.49800000  -0.55621636
  0.49800000  -0.55621637
  0.49800000  -0.55621639
  0.49800000  -0.55621640
  0.49800000  -0.55621642
  0.49800000  -0.55621643
  0.49800000  -0.55621644
  0.49800000  -0.55621646
  0.49800000  -0.55621647
  0.49800000  -0.55621649
  0.49800000  -0.55621650
  0.49800000  -0.55621651
  0.49800000  -0.55621653
  0.49800000  -0.55621654
  0.49800000  -0.55621655
  0.49800000  -0.55621657
  0.49800000  -0.55621658
  0.49800000  -0.55621660
  0.49800000  -0.55621661
  0.49800000  -0.55621662
  0.49800000  -0.55621664
  0.49800000  -0.55621665
  0.49800000  -0.55621666
  0.49800000  -0.55621668
  0.49800000  -0.55621669
  0.49800000  -0.55621670
  0.49900000  -0.55664442
  0.49900000  -0.55664443
  0.49900000  -0.55664445
  0.49900000  -0.55664446
  0.49900000  -0.55664447
  0.49900000  -0.55664449
  0.49900000  -0.55664450
  0.49900000  -0.55664452
  0.49900000  -0.55664453
  0.49900000  -0.55664455
  0.49900000  -0.55664456
  0.49900000  -0.55664458
  0.49900000  -0.55664459
  0.49900000  -0.55664460
  0.49900000  -0.55664462
  0.49900000  -0.55664463
  0.49900000  -0.55664465
  0.49900000  -0.55664466
  0.49900000  -0.55664467
  0.49900000  -0.55664469
  0.49900000  -0.55664470
  0.49900000  -0.55664472
  0.49900000  -0.55664473
  0.49900000  -0.55664474
  0.49900000  -0.55664476
  0.49900000  -0.55664477
  0.49900000  -0.55664479
  0.49900000  -0.55664480
  0.49900000  -0.55664481
  0.49900000  -0.55664483
  0.49900000  -0.55664484
  0.49900000  -0.55664486
  0.49900000  -0.55664487
  0.49900000  -0.55664488
  0.49900000  -0.55664490
  0.49900000  -0.55664491
  0.49900000  -0.55664492
  0.49900000  -0.55664494
  0.49900000  -0.55664495
  0.49900000  -0.55664496
  0.50000000  -0.55707176
  0.50000000  -0.55707177
  0.50000000  -0.55707179
  0.50000000  -0.55707180
  0.50000000  -0.55707182
  0.50000000  -0.55707183
  0.50000000  -0.55707184
  0.50000000  -0.55707186
  0.50000000  -0.55707187
  0.50000000  -0.55707189
  0.50000000  -0.55707190
  0.50000000  -0.55707192
  0.50000000  -0.55707193
  0.50000000  -0.55707194
  0.50000000  -0.55707196
  0.50000000  -0.55707197
  0.50000000  -0.55707199
  0.50000000  -0.55707200
  0.50000000  -0.55707202
  0.50000000  -0.55707203
  0.50000000  -0.55707204
  0.50000000  -0.55707206
  0.50000000  -0.55707207
  0.50000000  -0.55707209
  0.50000000  -0.55707210
  0.50000000  -0.55707211
  0.50000000  -0.55707213
  0.50000000  -0.55707214
  0.50000000  -0.55707215
  0.50000000  -0.55707217
  0.50000000  -0.55707218
  0.50000000  -0.55707220
  0.50000000  -0.55707221
  0.50000000  -0.55707222
  0.50000000  -0.55707224
  0.50000000  -0.55707225
  0.50000000  -0.55707226
  0.50000000  -0.55707228
  0.50000000  -0.55707229
  0.50000000  -0.55707230
  0.50100000  -0.55749818
  0.50100000  -0.55749820
  0.50100000  -0.55749821
  0.50100000  -0.55749823
  0.50100000  -0.55749824
  0.50100000  -0.55749825
  0.50100000  -0.55749827
  0.50100000  -0.55749828
  0.50100000  -0.55749830
  0.50100000  -0.55749831
  0.50100000  -0.55749833
  0.50100000  -0.55749834
  0.50100000  -0.55749835
  0.50100000  -0.55749837
  0.50100000  -0.55749838
  0.50100000  -0.55749840
  0.50100000  -0.55749841
  0.50100000  -0.55749843
  0.50100000  -0.55749844
  0.50100000  -0.55749845
  0.50100000  -0.55749847
  0.50100000  -0.55749848
  0.50100000  -0.55749850
  0.50100000  -0.55749851
  0.50100000  -0.55749852
  0.50100000  -0.55749854
  0.50100000  -0.55749855
  0.50100000  -0.55749857
  0.50100000  -0.55749858
  0.50100000  -0.55749859
  0.50100000  -0.55749861
  0.50100000  -0.55749862
  0.50100000  -0.55749863
  0.50100000  -0.55749865
  0.50100000  -0.55749866
  0.50100000  -0.55749868
  0.50100000  -0.55749869
  0.50100000  -0.55749870
  0.50100000  -0.55749872
  0.50100000  -0.55749873
  0.50200000  -0.55792369
  0.50200000  -0.55792371
  0.50200000  -0.55792372
  0.50200000  -0.55792374
  0.50200000  -0.55792375
  0.50200000  -0.55792377
  0.50200000  -0.55792378
  0.50200000  -0.55792379
  0.50200000  -0.55792381
  0.50200000  -0.55792382
  0.50200000  -0.55792384
  0.50200000  -0.55792385
  0.50200000  -0.55792387
  0.50200000  -0.55792388
  0.50200000  -0.55792390
  0.50200000  -0.55792391
  0.50200000  -0.55792392
  0.50200000  -0.55792394
  0.50200000  -0.55792395
  0.50200000  -0.55792397
  0.50200000  -0.55792398
  0.50200000  -0.55792399
  0.50200000  -0.55792401
  0.50200000  -0.55792402
  0.50200000  -0.55792404
  0.50200000  -0.55792405
  0.50200000  -0.55792406
  0.50200000  -0.55792408
  0.50200000  -0.55792409
  0.50200000  -0.55792411
  0.50200000  -0.55792412
  0.50200000  -0.55792413
  0.50200000  -0.55792415
  0.50200000  -0.55792416
  0.50200000  -0.55792417
  0.50200000  -0.55792419
  0.50200000  -0.55792420
  0.50200000  -0.55792421
  0.50200000  -0.55792423
  0.50200000  -0.55792424
  0.50300000  -0.55834830
  0.50300000  -0.55834831
  0.50300000  -0.55834833
  0.50300000  -0.55834834
  0.50300000  -0.55834835
  0.50300000  -0.55834837
  0.50300000  -0.55834838
  0.50300000  -0.55834840
  0.50300000  -0.55834841
  0.50300000  -0.55834843
  0.50300000  -0.55834844
  0.50300000  -0.55834846
  0.50300000  -0.55834847
  0.50300000  -0.55834848
  0.50300000  -0.55834850
  0.50300000  -0.55834851
  0.50300000  -0.55834853
  0.50300000  -0.55834854
  0.50300000  -0.55834855
  0.50300000  -0.55834857
  0.50300000  -0.55834858
  0.50300000  -0.55834860
  0.50300000  -0.55834861
  0.50300000  -0.55834862
  0.50300000  -0.55834864
  0.50300000  -0.55834865
  0.50300000  -0.55834867
  0.50300000  -0.55834868
  0.50300000  -0.55834869
  0.50300000  -0.55834871
  0.50300000  -0.55834872
  0.50300000  -0.55834874
  0.50300000  -0.55834875
  0.50300000  -0.55834876
  0.50300000  -0.55834878
  0.50300000  -0.55834879
  0.50300000  -0.55834880
  0.50300000  -0.55834882
  0.50300000  -0.55834883
  0.50300000  -0.55834884
  0.50400000  -0.55877199
  0.50400000  -0.55877201
  0.50400000  -0.55877202
  0.50400000  -0.55877204
  0.50400000  -0.55877205
  0.50400000  -0.55877207
  0.50400000  -0.55877208
  0.50400000  -0.55877209
  0.50400000  -0.55877211
  0.50400000  -0.55877212
  0.50400000  -0.55877214
  0.50400000  -0.55877215
  0.50400000  -0.55877217
  0.50400000  -0.55877218
  0.50400000  -0.55877219
  0.50400000  -0.55877221
  0.50400000  -0.55877222
  0.50400000  -0.55877224
  0.50400000  -0.55877225
  0.50400000  -0.55877227
  0.50400000  -0.55877228
  0.50400000  -0.55877229
  0.50400000  -0.55877231
  0.50400000  -0.55877232
  0.50400000  -0.55877234
  0.50400000  -0.55877235
  0.50400000  -0.55877236
  0.50400000  -0.55877238
  0.50400000  -0.55877239
  0.50400000  -0.55877240
  0.50400000  -0.55877242
  0.50400000  -0.55877243
  0.50400000  -0.55877245
  0.50400000  -0.55877246
  0.50400000  -0.55877247
  0.50400000  -0.55877249
  0.50400000  -0.55877250
  0.50400000  -0.55877251
  0.50400000  -0.55877253
  0.50400000  -0.55877254
  0.50500000  -0.55919479
  0.50500000  -0.55919480
  0.50500000  -0.55919482
  0.50500000  -0.55919483
  0.50500000  -0.55919484
  0.50500000  -0.55919486
  0.50500000  -0.55919487
  0.50500000  -0.55919489
  0.50500000  -0.55919490
  0.50500000  -0.55919492
  0.50500000  -0.55919493
  0.50500000  -0.55919495
  0.50500000  -0.55919496
  0.50500000  -0.55919497
  0.50500000  -0.55919499
  0.50500000  -0.55919500
  0.50500000  -0.55919502
  0.50500000  -0.55919503
  0.50500000  -0.55919505
  0.50500000  -0.55919506
  0.50500000  -0.55919507
  0.50500000  -0.55919509
  0.50500000  -0.55919510
  0.50500000  -0.55919512
  0.50500000  -0.55919513
  0.50500000  -0.55919514
  0.50500000  -0.55919516
  0.50500000  -0.55919517
  0.50500000  -0.55919518
  0.50500000  -0.55919520
  0.50500000  -0.55919521
  0.50500000  -0.55919523
  0.50500000  -0.55919524
  0.50500000  -0.55919525
  0.50500000  -0.55919527
  0.50500000  -0.55919528
  0.50500000  -0.55919529
  0.50500000  -0.55919531
  0.50500000  -0.55919532
  0.50500000  -0.55919534
  0.50600000  -0.55961668
  0.50600000  -0.55961670
  0.50600000  -0.55961671
  0.50600000  -0.55961672
  0.50600000  -0.55961674
  0.50600000  -0.55961675
  0.50600000  -0.55961677
  0.50600000  -0.55961678
  0.50600000  -0.55961680
  0.50600000  -0.55961681
  0.50600000  -0.55961683
  0.50600000  -0.55961684
  0.50600000  -0.55961685
  0.50600000  -0.55961687
  0.50600000  -0.55961688
  0.50600000  -0.55961690
  0.50600000  -0.55961691
  0.50600000  -0.55961693
  0.50600000  -0.55961694
  0.50600000  -0.55961695
  0.50600000  -0.55961697
  0.50600000  -0.55961698
  0.50600000  -0.55961700
  0.50600000  -0.55961701
  0.50600000  -0.55961702
  0.50600000  -0.55961704
  0.50600000  -0.55961705
  0.50600000  -0.55961707
  0.50600000  -0.55961708
  0.50600000  -0.55961709
  0.50600000  -0.55961711
  0.50600000  -0.55961712
  0.50600000  -0.55961713
  0.50600000  -0.55961715
  0.50600000  -0.55961716
  0.50600000  -0.55961718
  0.50600000  -0.55961719
  0.50600000  -0.55961720
  0.50600000  -0.55961722
  0.50600000  -0.55961723
  0.50700000  -0.56003768
  0.50700000  -0.56003769
  0.50700000  -0.56003771
  0.50700000  -0.56003772
  0.50700000  -0.56003774
  0.50700000  -0.56003775
  0.50700000  -0.56003777
  0.50700000  -0.56003778
  0.50700000  -0.56003780
  0.50700000  -0.56003781
  0.50700000  -0.56003782
  0.50700000  -0.56003784
  0.50700000  -0.56003785
  0.50700000  -0.56003787
  0.50700000  -0.56003788
  0.50700000  -0.56003790
  0.50700000  -0.56003791
  0.50700000  -0.56003792
  0.50700000  -0.56003794
  0.50700000  -0.56003795
  0.50700000  -0.56003797
  0.50700000  -0.56003798
  0.50700000  -0.56003799
  0.50700000  -0.56003801
  0.50700000  -0.56003802
  0.50700000  -0.56003804
  0.50700000  -0.56003805
  0.50700000  -0.56003806
  0.50700000  -0.56003808
  0.50700000  -0.56003809
  0.50700000  -0.56003811
  0.50700000  -0.56003812
  0.50700000  -0.56003813
  0.50700000  -0.56003815
  0.50700000  -0.56003816
  0.50700000  -0.56003817
  0.50700000  -0.56003819
  0.50700000  -0.56003820
  0.50700000  -0.56003821
  0.50700000  -0.56003823
  0.50800000  -0.56045778
  0.50800000  -0.56045780
  0.50800000  -0.56045781
  0.50800000  -0.56045783
  0.50800000  -0.56045784
  0.50800000  -0.56045786
  0.50800000  -0.56045787
  0.50800000  -0.56045789
  0.50800000  -0.56045790
  0.50800000  -0.56045791
  0.50800000  -0.56045793
  0.50800000  -0.56045794
  0.50800000  -0.56045796
  0.50800000  -0.56045797
  0.50800000  -0.56045799
  0.50800000  -0.56045800
  0.50800000  -0.56045801
  0.50800000  -0.56045803
  0.50800000  -0.56045804
  0.50800000  -0.56045806
  0.50800000  -0.56045807
  0.50800000  -0.56045809
  0.50800000  -0.56045810
  0.50800000  -0.56045811
  0.50800000  -0.56045813
  0.50800000  -0.56045814
  0.50800000  -0.56045815
  0.50800000  -0.56045817
  0.50800000  -0.56045818
  0.50800000  -0.56045820
  0.50800000  -0.56045821
  0.50800000  -0.56045822
  0.50800000  -0.56045824
  0.50800000  -0.56045825
  0.50800000  -0.56045827
  0.50800000  -0.56045828
  0.50800000  -0.56045829
  0.50800000  -0.56045831
  0.50800000  -0.56045832
  0.50800000  -0.56045833
  0.50900000  -0.56087700
  0.50900000  -0.56087701
  0.50900000  -0.56087703
  0.50900000  -0.56087704
  0.50900000  -0.56087706
  0.50900000  -0.56087707
  0.50900000  -0.56087709
  0.50900000  -0.56087710
  0.50900000  -0.56087712
  0.50900000  -0.56087713
  0.50900000  -0.56087714
  0.50900000  -0.56087716
  0.50900000  -0.56087717
  0.50900000  -0.56087719
  0.50900000  -0.56087720
  0.50900000  -0.56087722
  0.50900000  -0.56087723
  0.50900000  -0.56087724
  0.50900000  -0.56087726
  0.50900000  -0.56087727
  0.50900000  -0.56087729
  0.50900000  -0.56087730
  0.50900000  -0.56087731
  0.50900000  -0.56087733
  0.50900000  -0.56087734
  0.50900000  -0.56087736
  0.50900000  -0.56087737
  0.50900000  -0.56087738
  0.50900000  -0.56087740
  0.50900000  -0.56087741
  0.50900000  -0.56087743
  0.50900000  -0.56087744
  0.50900000  -0.56087745
  0.50900000  -0.56087747
  0.50900000  -0.56087748
  0.50900000  -0.56087749
  0.50900000  -0.56087751
  0.50900000  -0.56087752
  0.50900000  -0.56087753
  0.50900000  -0.56087755
  0.51000000  -0.56129533
  0.51000000  -0.56129534
  0.51000000  -0.56129536
  0.51000000  -0.56129537
  0.51000000  -0.56129539
  0.51000000  -0.56129540
  0.51000000  -0.56129542
  0.51000000  -0.56129543
  0.51000000  -0.56129544
  0.51000000  -0.56129546
  0.51000000  -0.56129547
  0.51000000  -0.56129549
  0.51000000  -0.56129550
  0.51000000  -0.56129552
  0.51000000  -0.56129553
  0.51000000  -0.56129554
  0.51000000  -0.56129556
  0.51000000  -0.56129557
  0.51000000  -0.56129559
  0.51000000  -0.56129560
  0.51000000  -0.56129561
  0.51000000  -0.56129563
  0.51000000  -0.56129564
  0.51000000  -0.56129566
  0.51000000  -0.56129567
  0.51000000  -0.56129568
  0.51000000  -0.56129570
  0.51000000  -0.56129571
  0.51000000  -0.56129573
  0.51000000  -0.56129574
  0.51000000  -0.56129575
  0.51000000  -0.56129577
  0.51000000  -0.56129578
  0.51000000  -0.56129580
  0.51000000  -0.56129581
  0.51000000  -0.56129582
  0.51000000  -0.56129584
  0.51000000  -0.56129585
  0.51000000  -0.56129586
  0.51000000  -0.56129588
  0.51100000  -0.56171277
  0.51100000  -0.56171279
  0.51100000  -0.56171280
  0.51100000  -0.56171282
  0.51100000  -0.56171283
  0.51100000  -0.56171285
  0.51100000  -0.56171286
  0.51100000  -0.56171287
  0.51100000  -0.56171289
  0.51100000  -0.56171290
  0.51100000  -0.56171292
  0.51100000  -0.56171293
  0.51100000  -0.56171295
  0.51100000  -0.56171296
  0.51100000  -0.56171298
  0.51100000  -0.56171299
  0.51100000  -0.56171300
  0.51100000  -0.56171302
  0.51100000  -0.56171303
  0.51100000  -0.56171305
  0.51100000  -0.56171306
  0.51100000  -0.56171307
  0.51100000  -0.56171309
  0.51100000  -0.56171310
  0.51100000  -0.56171312
  0.51100000  -0.56171313
  0.51100000  -0.56171314
  0.51100000  -0.56171316
  0.51100000  -0.56171317
  0.51100000  -0.56171319
  0.51100000  -0.56171320
  0.51100000  -0.56171321
  0.51100000  -0.56171323
  0.51100000  -0.56171324
  0.51100000  -0.56171325
  0.51100000  -0.56171327
  0.51100000  -0.56171328
  0.51100000  -0.56171330
  0.51100000  -0.56171331
  0.51100000  -0.56171332
  0.51200000  -0.56212934
  0.51200000  -0.56212935
  0.51200000  -0.56212937
  0.51200000  -0.56212938
  0.51200000  -0.56212940
  0.51200000  -0.56212941
  0.51200000  -0.56212942
  0.51200000  -0.56212944
  0.51200000  -0.56212945
  0.51200000  -0.56212947
  0.51200000  -0.56212948
  0.51200000  -0.56212950
  0.51200000  -0.56212951
  0.51200000  -0.56212953
  0.51200000  -0.56212954
  0.51200000  -0.56212955
  0.51200000  -0.56212957
  0.51200000  -0.56212958
  0.51200000  -0.56212960
  0.51200000  -0.56212961
  0.51200000  -0.56212962
  0.51200000  -0.56212964
  0.51200000  -0.56212965
  0.51200000  -0.56212967
  0.51200000  -0.56212968
  0.51200000  -0.56212969
  0.51200000  -0.56212971
  0.51200000  -0.56212972
  0.51200000  -0.56212974
  0.51200000  -0.56212975
  0.51200000  -0.56212976
  0.51200000  -0.56212978
  0.51200000  -0.56212979
  0.51200000  -0.56212981
  0.51200000  -0.56212982
  0.51200000  -0.56212983
  0.51200000  -0.56212985
  0.51200000  -0.56212986
  0.51200000  -0.56212987
  0.51200000  -0.56212989
  0.51300000  -0.56254502
  0.51300000  -0.56254504
  0.51300000  -0.56254505
  0.51300000  -0.56254507
  0.51300000  -0.56254508
  0.51300000  -0.56254510
  0.51300000  -0.56254511
  0.51300000  -0.56254513
  0.51300000  -0.56254514
  0.51300000  -0.56254516
  0.51300000  -0.56254517
  0.51300000  -0.56254518
  0.51300000  -0.56254520
  0.51300000  -0.56254521
  0.51300000  -0.56254523
  0.51300000  -0.56254524
  0.51300000  -0.56254526
  0.51300000  -0.56254527
  0.51300000  -0.56254528
  0.51300000  -0.56254530
  0.51300000  -0.56254531
  0.51300000  -0.56254533
  0.51300000  -0.56254534
  0.51300000  -0.56254535
  0.51300000  -0.56254537
  0.51300000  -0.56254538
  0.51300000  -0.56254540
  0.51300000  -0.56254541
  0.51300000  -0.56254542
  0.51300000  -0.56254544
  0.51300000  -0.56254545
  0.51300000  -0.56254547
  0.51300000  -0.56254548
  0.51300000  -0.56254549
  0.51300000  -0.56254551
  0.51300000  -0.56254552
  0.51300000  -0.56254553
  0.51300000  -0.56254555
  0.51300000  -0.56254556
  0.51300000  -0.56254557
  0.51400000  -0.56295984
  0.51400000  -0.56295985
  0.51400000  -0.56295987
  0.51400000  -0.56295988
  0.51400000  -0.56295990
  0.51400000  -0.56295991
  0.51400000  -0.56295993
  0.51400000  -0.56295994
  0.51400000  -0.56295995
  0.51400000  -0.56295997
  0.51400000  -0.56295998
  0.51400000  -0.56296000
  0.51400000  -0.56296001
  0.51400000  -0.56296003
  0.51400000  -0.56296004
  0.51400000  -0.56296005
  0.51400000  -0.56296007
  0.51400000  -0.56296008
  0.51400000  -0.56296010
  0.51400000  -0.56296011
  0.51400000  -0.56296013
  0.51400000  -0.56296014
  0.51400000  -0.56296015
  0.51400000  -0.56296017
  0.51400000  -0.56296018
  0.51400000  -0.56296020
  0.51400000  -0.56296021
  0.51400000  -0.56296022
  0.51400000  -0.56296024
  0.51400000  -0.56296025
  0.51400000  -0.56296026
  0.51400000  -0.56296028
  0.51400000  -0.56296029
  0.51400000  -0.56296031
  0.51400000  -0.56296032
  0.51400000  -0.56296033
  0.51400000  -0.56296035
  0.51400000  -0.56296036
  0.51400000  -0.56296037
  0.51400000  -0.56296039
  0.51500000  -0.56337378
  0.51500000  -0.56337379
  0.51500000  -0.56337381
  0.51500000  -0.56337382
  0.51500000  -0.56337384
  0.51500000  -0.56337385
  0.51500000  -0.56337387
  0.51500000  -0.56337388
  0.51500000  -0.56337390
  0.51500000  -0.56337391
  0.51500000  -0.56337393
  0.51500000  -0.56337394
  0.51500000  -0.56337395
  0.51500000  -0.56337397
  0.51500000  -0.56337398
  0.51500000  -0.56337400
  0.51500000  -0.56337401
  0.51500000  -0.56337403
  0.51500000  -0.56337404
  0.51500000  -0.56337405
  0.51500000  -0.56337407
  0.51500000  -0.56337408
  0.51500000  -0.56337410
  0.51500000  -0.56337411
  0.51500000  -0.56337412
  0.51500000  -0.56337414
  0.51500000  -0.56337415
  0.51500000  -0.56337417
  0.51500000  -0.56337418
  0.51500000  -0.56337419
  0.51500000  -0.56337421
  0.51500000  -0.56337422
  0.51500000  -0.56337423
  0.51500000  -0.56337425
  0.51500000  -0.56337426
  0.51500000  -0.56337428
  0.51500000  -0.56337429
  0.51500000  -0.56337430
  0.51500000  -0.56337432
  0.51500000  -0.56337433
  0.51600000  -0.56378685
  0.51600000  -0.56378687
  0.51600000  -0.56378688
  0.51600000  -0.56378690
  0.51600000  -0.56378691
  0.51600000  -0.56378693
  0.51600000  -0.56378694
  0.51600000  -0.56378696
  0.51600000  -0.56378697
  0.51600000  -0.56378699
  0.51600000  -0.56378700
  0.51600000  -0.56378701
  0.51600000  -0.56378703
  0.51600000  -0.56378704
  0.51600000  -0.56378706
  0.51600000  -0.56378707
  0.51600000  -0.56378709
  0.51600000  -0.56378710
  0.51600000  -0.56378711
  0.51600000  -0.56378713
  0.51600000  -0.56378714
  0.51600000  -0.56378716
  0.51600000  -0.56378717
  0.51600000  -0.56378718
  0.51600000  -0.56378720
  0.51600000  -0.56378721
  0.51600000  -0.56378723
  0.51600000  -0.56378724
  0.51600000  -0.56378725
  0.51600000  -0.56378727
  0.51600000  -0.56378728
  0.51600000  -0.56378729
  0.51600000  -0.56378731
  0.51600000  -0.56378732
  0.51600000  -0.56378734
  0.51600000  -0.56378735
  0.51600000  -0.56378736
  0.51600000  -0.56378738
  0.51600000  -0.56378739
  0.51600000  -0.56378740
  0.51700000  -0.56419906
  0.51700000  -0.56419908
  0.51700000  -0.56419909
  0.51700000  -0.56419911
  0.51700000  -0.56419912
  0.51700000  -0.56419914
  0.51700000  -0.56419915
  0.51700000  -0.56419917
  0.51700000  -0.56419918
  0.51700000  -0.56419919
  0.51700000  -0.56419921
  0.51700000  -0.56419922
  0.51700000  -0.56419924
  0.51700000  -0.56419925
  0.51700000  -0.56419927
  0.51700000  -0.56419928
  0.51700000  -0.56419929
  0.51700000  -0.56419931
  0.51700000  -0.56419932
  0.51700000  -0.56419934
  0.51700000  -0.56419935
  0.51700000  -0.56419937
  0.51700000  -0.56419938
  0.51700000  -0.56419939
  0.51700000  -0.56419941
  0.51700000  -0.56419942
  0.51700000  -0.56419944
  0.51700000  -0.56419945
  0.51700000  -0.56419946
  0.51700000  -0.56419948
  0.51700000  -0.56419949
  0.51700000  -0.56419950
  0.51700000  -0.56419952
  0.51700000  -0.56419953
  0.51700000  -0.56419955
  0.51700000  -0.56419956
  0.51700000  -0.56419957
  0.51700000  -0.56419959
  0.51700000  -0.56419960
  0.51700000  -0.56419961
  0.51800000  -0.56461041
  0.51800000  -0.56461043
  0.51800000  -0.56461044
  0.51800000  -0.56461045
  0.51800000  -0.56461047
  0.51800000  -0.56461048
  0.51800000  -0.56461050
  0.51800000  -0.56461051
  0.51800000  -0.56461053
  0.51800000  -0.56461054
  0.51800000  -0.56461056
  0.51800000  -0.56461057
  0.51800000  -0.56461058
  0.51800000  -0.56461060
  0.51800000  -0.56461061
  0.51800000  -0.56461063
  0.51800000  -0.56461064
  0.51800000  -0.56461066
  0.51800000  -0.56461067
  0.51800000  -0.56461068
  0.51800000  -0.56461070
  0.51800000  -0.56461071
  0.51800000  -0.56461073
  0.51800000  -0.56461074
  0.51800000  -0.56461075
  0.51800000  -0.56461077
  0.51800000  -0.56461078
  0.51800000  -0.56461080
  0.51800000  -0.56461081
  0.51800000  -0.56461082
  0.51800000  -0.56461084
  0.51800000  -0.56461085
  0.51800000  -0.56461087
  0.51800000  -0.56461088
  0.51800000  -0.56461089
  0.51800000  -0.56461091
  0.51800000  -0.56461092
  0.51800000  -0.56461093
  0.51800000  -0.56461095
  0.51800000  -0.56461096
  0.51900000  -0.56502090
  0.51900000  -0.56502091
  0.51900000  -0.56502093
  0.51900000  -0.56502094
  0.51900000  -0.56502096
  0.51900000  -0.56502097
  0.51900000  -0.56502099
  0.51900000  -0.56502100
  0.51900000  -0.56502102
  0.51900000  -0.56502103
  0.51900000  -0.56502104
  0.51900000  -0.56502106
  0.51900000  -0.56502107
  0.51900000  -0.56502109
  0.51900000  -0.56502110
  0.51900000  -0.56502112
  0.51900000  -0.56502113
  0.51900000  -0.56502114
  0.51900000  -0.56502116
  0.51900000  -0.56502117
  0.51900000  -0.56502119
  0.51900000  -0.56502120
  0.51900000  -0.56502122
  0.51900000  -0.56502123
  0.51900000  -0.56502124
  0.51900000  -0.56502126
  0.51900000  -0.56502127
  0.51900000  -0.56502128
  0.51900000  -0.56502130
  0.51900000  -0.56502131
  0.51900000  -0.56502133
  0.51900000  -0.56502134
  0.51900000  -0.56502135
  0.51900000  -0.56502137
  0.51900000  -0.56502138
  0.51900000  -0.56502140
  0.51900000  -0.56502141
  0.51900000  -0.56502142
  0.51900000  -0.56502144
  0.51900000  -0.56502145
  0.52000000  -0.56543053
  0.52000000  -0.56543055
  0.52000000  -0.56543056
  0.52000000  -0.56543058
  0.52000000  -0.56543059
  0.52000000  -0.56543060
  0.52000000  -0.56543062
  0.52000000  -0.56543063
  0.52000000  -0.56543065
  0.52000000  -0.56543066
  0.52000000  -0.56543068
  0.52000000  -0.56543069
  0.52000000  -0.56543071
  0.52000000  -0.56543072
  0.52000000  -0.56543073
  0.52000000  -0.56543075
  0.52000000  -0.56543076
  0.52000000  -0.56543078
  0.52000000  -0.56543079
  0.52000000  -0.56543081
  0.52000000  -0.56543082
  0.52000000  -0.56543083
  0.52000000  -0.56543085
  0.52000000  -0.56543086
  0.52000000  -0.56543088
  0.52000000  -0.56543089
  0.52000000  -0.56543090
  0.52000000  -0.56543092
  0.52000000  -0.56543093
  0.52000000  -0.56543095
  0.52000000  -0.56543096
  0.52000000  -0.56543097
  0.52000000  -0.56543099
  0.52000000  -0.56543100
  0.52000000  -0.56543101
  0.52000000  -0.56543103
  0.52000000  -0.56543104
  0.52000000  -0.56543106
  0.52000000  -0.56543107
  0.52000000  -0.56543108
  0.52100000  -0.56583931
  0.52100000  -0.56583933
  0.52100000  -0.56583934
  0.52100000  -0.56583936
  0.52100000  -0.56583937
  0.52100000  -0.56583938
  0.52100000  -0.56583940
  0.52100000  -0.56583941
  0.52100000  -0.56583943
  0.52100000  -0.56583944
  0.52100000  -0.56583946
  0.52100000  -0.56583947
  0.52100000  -0.56583949
  0.52100000  -0.56583950
  0.52100000  -0.56583951
  0.52100000  -0.56583953
  0.52100000  -0.56583954
  0.52100000  -0.56583956
  0.52100000  -0.56583957
  0.52100000  -0.56583959
  0.52100000  -0.56583960
  0.52100000  -0.56583961
  0.52100000  -0.56583963
  0.52100000  -0.56583964
  0.52100000  -0.56583966
  0.52100000  -0.56583967
  0.52100000  -0.56583968
  0.52100000  -0.56583970
  0.52100000  -0.56583971
  0.52100000  -0.56583973
  0.52100000  -0.56583974
  0.52100000  -0.56583975
  0.52100000  -0.56583977
  0.52100000  -0.56583978
  0.52100000  -0.56583979
  0.52100000  -0.56583981
  0.52100000  -0.56583982
  0.52100000  -0.56583984
  0.52100000  -0.56583985
  0.52100000  -0.56583986
  0.52200000  -0.56624724
  0.52200000  -0.56624726
  0.52200000  -0.56624727
  0.52200000  -0.56624729
  0.52200000  -0.56624730
  0.52200000  -0.56624731
  0.52200000  -0.56624733
  0.52200000  -0.56624734
  0.52200000  -0.56624736
  0.52200000  -0.56624737
  0.52200000  -0.56624739
  0.52200000  -0.56624740
  0.52200000  -0.56624742
  0.52200000  -0.56624743
  0.52200000  -0.56624744
  0.52200000  -0.56624746
  0.52200000  -0.56624747
  0.52200000  -0.56624749
  0.52200000  -0.56624750
  0.52200000  -0.56624752
  0.52200000  -0.56624753
  0.52200000  -0.56624754
  0.52200000  -0.56624756
  0.52200000  -0.56624757
  0.52200000  -0.56624759
  0.52200000  -0.56624760
  0.52200000  -0.56624761
  0.52200000  -0.56624763
  0.52200000  -0.56624764
  0.52200000  -0.56624766
  0.52200000  -0.56624767
  0.52200000  -0.56624768
  0.52200000  -0.56624770
  0.52200000  -0.56624771
  0.52200000  -0.56624772
  0.52200000  -0.56624774
  0.52200000  -0.56624775
  0.52200000  -0.56624777
  0.52200000  -0.56624778
  0.52200000  -0.56624779
  0.52300000  -0.56665432
  0.52300000  -0.56665434
  0.52300000  -0.56665435
  0.52300000  -0.56665437
  0.52300000  -0.56665438
  0.52300000  -0.56665440
  0.52300000  -0.56665441
  0.52300000  -0.56665443
  0.52300000  -0.56665444
  0.52300000  -0.56665446
  0.52300000  -0.56665447
  0.52300000  -0.56665448
  0.52300000  -0.56665450
  0.52300000  -0.56665451
  0.52300000  -0.56665453
  0.52300000  -0.56665454
  0.52300000  -0.56665456
  0.52300000  -0.56665457
  0.52300000  -0.56665458
  0.52300000  -0.56665460
  0.52300000  -0.56665461
  0.52300000  -0.56665463
  0.52300000  -0.56665464
  0.52300000  -0.56665465
  0.52300000  -0.56665467
  0.52300000  -0.56665468
  0.52300000  -0.56665470
  0.52300000  -0.56665471
  0.52300000  -0.56665472
  0.52300000  -0.56665474
  0.52300000  -0.56665475
  0.52300000  -0.56665477
  0.52300000  -0.56665478
  0.52300000  -0.56665479
  0.52300000  -0.56665481
  0.52300000  -0.56665482
  0.52300000  -0.56665483
  0.52300000  -0.56665485
  0.52300000  -0.56665486
  0.52300000  -0.56665488
  0.52400000  -0.56706056
  0.52400000  -0.56706058
  0.52400000  -0.56706059
  0.52400000  -0.56706061
  0.52400000  -0.56706062
  0.52400000  -0.56706064
  0.52400000  -0.56706065
  0.52400000  -0.56706067
  0.52400000  -0.56706068
  0.52400000  -0.56706069
  0.52400000  -0.56706071
  0.52400000  -0.56706072
  0.52400000  -0.56706074
  0.52400000  -0.56706075
  0.52400000  -0.56706077
  0.52400000  -0.56706078
  0.52400000  -0.56706079
  0.52400000  -0.56706081
  0.52400000  -0.56706082
  0.52400000  -0.56706084
  0.52400000  -0.56706085
  0.52400000  -0.56706087
  0.52400000  -0.56706088
  0.52400000  -0.56706089
  0.52400000  -0.56706091
  0.52400000  -0.56706092
  0.52400000  -0.56706094
  0.52400000  -0.56706095
  0.52400000  -0.56706096
  0.52400000  -0.56706098
  0.52400000  -0.56706099
  0.52400000  -0.56706100
  0.52400000  -0.56706102
  0.52400000  -0.56706103
  0.52400000  -0.56706105
  0.52400000  -0.56706106
  0.52400000  -0.56706107
  0.52400000  -0.56706109
  0.52400000  -0.56706110
  0.52400000  -0.56706111
  0.52500000  -0.56746596
  0.52500000  -0.56746598
  0.52500000  -0.56746599
  0.52500000  -0.56746601
  0.52500000  -0.56746602
  0.52500000  -0.56746603
  0.52500000  -0.56746605
  0.52500000  -0.56746606
  0.52500000  -0.56746608
  0.52500000  -0.56746609
  0.52500000  -0.56746611
  0.52500000  -0.56746612
  0.52500000  -0.56746614
  0.52500000  -0.56746615
  0.52500000  -0.56746616
  0.52500000  -0.56746618
  0.52500000  -0.56746619
  0.52500000  -0.56746621
  0.52500000  -0.56746622
  0.52500000  -0.56746624
  0.52500000  -0.56746625
  0.52500000  -0.56746626
  0.52500000  -0.56746628
  0.52500000  -0.56746629
  0.52500000  -0.56746631
  0.52500000  -0.56746632
  0.52500000  -0.56746633
  0.52500000  -0.56746635
  0.52500000  -0.56746636
  0.52500000  -0.56746638
  0.52500000  -0.56746639
  0.52500000  -0.56746640
  0.52500000  -0.56746642
  0.52500000  -0.56746643
  0.52500000  -0.56746644
  0.52500000  -0.56746646
  0.52500000  -0.56746647
  0.52500000  -0.56746649
  0.52500000  -0.56746650
  0.52500000  -0.56746651
  0.52600000  -0.56787052
  0.52600000  -0.56787054
  0.52600000  -0.56787055
  0.52600000  -0.56787057
  0.52600000  -0.56787058
  0.52600000  -0.56787059
  0.52600000  -0.56787061
  0.52600000  -0.56787062
  0.52600000  -0.56787064
  0.52600000  -0.56787065
  0.52600000  -0.56787067
  0.52600000  -0.56787068
  0.52600000  -0.56787070
  0.52600000  -0.56787071
  0.52600000  -0.56787072
  0.52600000  -0.56787074
  0.52600000  -0.56787075
  0.52600000  -0.56787077
  0.52600000  -0.56787078
  0.52600000  -0.56787080
  0.52600000  -0.56787081
  0.52600000  -0.56787082
  0.52600000  -0.56787084
  0.52600000  -0.56787085
  0.52600000  -0.56787087
  0.52600000  -0.56787088
  0.52600000  -0.56787089
  0.52600000  -0.56787091
  0.52600000  -0.56787092
  0.52600000  -0.56787094
  0.52600000  -0.56787095
  0.52600000  -0.56787096
  0.52600000  -0.56787098
  0.52600000  -0.56787099
  0.52600000  -0.56787100
  0.52600000  -0.56787102
  0.52600000  -0.56787103
  0.52600000  -0.56787105
  0.52600000  -0.56787106
  0.52600000  -0.56787107
  0.52700000  -0.56827425
  0.52700000  -0.56827426
  0.52700000  -0.56827428
  0.52700000  -0.56827429
  0.52700000  -0.56827430
  0.52700000  -0.56827432
  0.52700000  -0.56827433
  0.52700000  -0.56827435
  0.52700000  -0.56827436
  0.52700000  -0.56827438
  0.52700000  -0.56827439
  0.52700000  -0.56827441
  0.52700000  -0.56827442
  0.52700000  -0.56827443
  0.52700000  -0.56827445
  0.52700000  -0.56827446
  0.52700000  -0.56827448
  0.52700000  -0.56827449
  0.52700000  -0.56827451
  0.52700000  -0.56827452
  0.52700000  -0.56827453
  0.52700000  -0.56827455
  0.52700000  -0.56827456
  0.52700000  -0.56827458
  0.52700000  -0.56827459
  0.52700000  -0.56827460
  0.52700000  -0.56827462
  0.52700000  -0.56827463
  0.52700000  -0.56827465
  0.52700000  -0.56827466
  0.52700000  -0.56827467
  0.52700000  -0.56827469
  0.52700000  -0.56827470
  0.52700000  -0.56827472
  0.52700000  -0.56827473
  0.52700000  -0.56827474
  0.52700000  -0.56827476
  0.52700000  -0.56827477
  0.52700000  -0.56827478
  0.52700000  -0.56827480
  0.52800000  -0.56867714
  0.52800000  -0.56867715
  0.52800000  -0.56867717
  0.52800000  -0.56867718
  0.52800000  -0.56867720
  0.52800000  -0.56867721
  0.52800000  -0.56867723
  0.52800000  -0.56867724
  0.52800000  -0.56867726
  0.52800000  -0.56867727
  0.52800000  -0.56867728
  0.52800000  -0.56867730
  0.52800000  -0.56867731
  0.52800000  -0.56867733
  0.52800000  -0.56867734
  0.52800000  -0.56867736
  0.52800000  -0.56867737
  0.52800000  -0.56867738
  0.52800000  -0.56867740
  0.52800000  -0.56867741
  0.52800000  -0.56867743
  0.52800000  -0.56867744
  0.52800000  -0.56867745
  0.52800000  -0.56867747
  0.52800000  -0.56867748
  0.52800000  -0.56867750
  0.52800000  -0.56867751
  0.52800000  -0.56867752
  0.52800000  -0.56867754
  0.52800000  -0.56867755
  0.52800000  -0.56867757
  0.52800000  -0.56867758
  0.52800000  -0.56867759
  0.52800000  -0.56867761
  0.52800000  -0.56867762
  0.52800000  -0.56867764
  0.52800000  -0.56867765
  0.52800000  -0.56867766
  0.52800000  -0.56867768
  0.52800000  -0.56867769
  0.52900000  -0.56907920
  0.52900000  -0.56907922
  0.52900000  -0.56907923
  0.52900000  -0.56907925
  0.52900000  -0.56907926
  0.52900000  -0.56907927
  0.52900000  -0.56907929
  0.52900000  -0.56907930
  0.52900000  -0.56907932
  0.52900000  -0.56907933
  0.52900000  -0.56907935
  0.52900000  -0.56907936
  0.52900000  -0.56907938
  0.52900000  -0.56907939
  0.52900000  -0.56907940
  0.52900000  -0.56907942
  0.52900000  -0.56907943
  0.52900000  -0.56907945
  0.52900000  -0.56907946
  0.52900000  -0.56907948
  0.52900000  -0.56907949
  0.52900000  -0.56907950
  0.52900000  -0.56907952
  0.52900000  -0.56907953
  0.52900000  -0.56907955
  0.52900000  -0.56907956
  0.52900000  -0.56907957
  0.52900000  -0.56907959
  0.52900000  -0.56907960
  0.52900000  -0.56907962
  0.52900000  -0.56907963
  0.52900000  -0.56907964
  0.52900000  -0.56907966
  0.52900000  -0.56907967
  0.52900000  -0.56907968
  0.52900000  -0.56907970
  0.52900000  -0.56907971
  0.52900000  -0.56907973
  0.52900000  -0.56907974
  0.52900000  -0.56907975
  0.53000000  -0.56948044
  0.53000000  -0.56948045
  0.53000000  -0.56948047
  0.53000000  -0.56948048
  0.53000000  -0.56948050
  0.53000000  -0.56948051
  0.53000000  -0.56948053
  0.53000000  -0.56948054
  0.53000000  -0.56948055
  0.53000000  -0.56948057
  0.53000000  -0.56948058
  0.53000000  -0.56948060
  0.53000000  -0.56948061
  0.53000000  -0.56948063
  0.53000000  -0.56948064
  0.53000000  -0.56948066
  0.53000000  -0.56948067
  0.53000000  -0.56948068
  0.53000000  -0.56948070
  0.53000000  -0.56948071
  0.53000000  -0.56948073
  0.53000000  -0.56948074
  0.53000000  -0.56948075
  0.53000000  -0.56948077
  0.53000000  -0.56948078
  0.53000000  -0.56948080
  0.53000000  -0.56948081
  0.53000000  -0.56948082
  0.53000000  -0.56948084
  0.53000000  -0.56948085
  0.53000000  -0.56948087
  0.53000000  -0.56948088
  0.53000000  -0.56948089
  0.53000000  -0.56948091
  0.53000000  -0.56948092
  0.53000000  -0.56948093
  0.53000000  -0.56948095
  0.53000000  -0.56948096
  0.53000000  -0.56948098
  0.53000000  -0.56948099
  0.53100000  -0.56988085
  0.53100000  -0.56988086
  0.53100000  -0.56988088
  0.53100000  -0.56988089
  0.53100000  -0.56988091
  0.53100000  -0.56988092
  0.53100000  -0.56988094
  0.53100000  -0.56988095
  0.53100000  -0.56988097
  0.53100000  -0.56988098
  0.53100000  -0.56988100
  0.53100000  -0.56988101
  0.53100000  -0.56988102
  0.53100000  -0.56988104
  0.53100000  -0.56988105
  0.53100000  -0.56988107
  0.53100000  -0.56988108
  0.53100000  -0.56988110
  0.53100000  -0.56988111
  0.53100000  -0.56988112
  0.53100000  -0.56988114
  0.53100000  -0.56988115
  0.53100000  -0.56988117
  0.53100000  -0.56988118
  0.53100000  -0.56988119
  0.53100000  -0.56988121
  0.53100000  -0.56988122
  0.53100000  -0.56988124
  0.53100000  -0.56988125
  0.53100000  -0.56988126
  0.53100000  -0.56988128
  0.53100000  -0.56988129
  0.53100000  -0.56988131
  0.53100000  -0.56988132
  0.53100000  -0.56988133
  0.53100000  -0.56988135
  0.53100000  -0.56988136
  0.53100000  -0.56988137
  0.53100000  -0.56988139
  0.53100000  -0.56988140
  0.53200000  -0.57028044
  0.53200000  -0.57028046
  0.53200000  -0.57028047
  0.53200000  -0.57028049
  0.53200000  -0.57028050
  0.53200000  -0.57028052
  0.53200000  -0.57028053
  0.53200000  -0.57028054
  0.53200000  -0.57028056
  0.53200000  -0.57028057
  0.53200000  -0.57028059
  0.53200000  -0.57028060
  0.53200000  -0.57028062
  0.53200000  -0.57028063
  0.53200000  -0.57028065
  0.53200000  -0.57028066
  0.53200000  -0.57028067
  0.53200000  -0.57028069
  0.53200000  -0.57028070
  0.53200000  -0.57028072
  0.53200000  -0.57028073
  0.53200000  -0.57028074
  0.53200000  -0.57028076
  0.53200000  -0.57028077
  0.53200000  -0.57028079
  0.53200000  -0.57028080
  0.53200000  -0.57028081
  0.53200000  -0.57028083
  0.53200000  -0.57028084
  0.53200000  -0.57028086
  0.53200000  -0.57028087
  0.53200000  -0.57028088
  0.53200000  -0.57028090
  0.53200000  -0.57028091
  0.53200000  -0.57028093
  0.53200000  -0.57028094
  0.53200000  -0.57028095
  0.53200000  -0.57028097
  0.53200000  -0.57028098
  0.53200000  -0.57028099
  0.53300000  -0.57067922
  0.53300000  -0.57067923
  0.53300000  -0.57067924
  0.53300000  -0.57067926
  0.53300000  -0.57067927
  0.53300000  -0.57067929
  0.53300000  -0.57067930
  0.53300000  -0.57067932
  0.53300000  -0.57067933
  0.53300000  -0.57067935
  0.53300000  -0.57067936
  0.53300000  -0.57067938
  0.53300000  -0.57067939
  0.53300000  -0.57067940
  0.53300000  -0.57067942
  0.53300000  -0.57067943
  0.53300000  -0.57067945
  0.53300000  -0.57067946
  0.53300000  -0.57067948
  0.53300000  -0.57067949
  0.53300000  -0.57067950
  0.53300000  -0.57067952
  0.53300000  -0.57067953
  0.53300000  -0.57067955
  0.53300000  -0.57067956
  0.53300000  -0.57067957
  0.53300000  -0.57067959
  0.53300000  -0.57067960
  0.53300000  -0.57067962
  0.53300000  -0.57067963
  0.53300000  -0.57067964
  0.53300000  -0.57067966
  0.53300000  -0.57067967
  0.53300000  -0.57067969
  0.53300000  -0.57067970
  0.53300000  -0.57067971
  0.53300000  -0.57067973
  0.53300000  -0.57067974
  0.53300000  -0.57067975
  0.53300000  -0.57067977
  0.53400000  -0.57107717
  0.53400000  -0.57107719
  0.53400000  -0.57107720
  0.53400000  -0.57107722
  0.53400000  -0.57107723
  0.53400000  -0.57107725
  0.53400000  -0.57107726
  0.53400000  -0.57107728
  0.53400000  -0.57107729
  0.53400000  -0.57107731
  0.53400000  -0.57107732
  0.53400000  -0.57107733
  0.53400000  -0.57107735
  0.53400000  -0.57107736
  0.53400000  -0.57107738
  0.53400000  -0.57107739
  0.53400000  -0.57107741
  0.53400000  -0.57107742
  0.53400000  -0.57107743
  0.53400000  -0.57107745
  0.53400000  -0.57107746
  0.53400000  -0.57107748
  0.53400000  -0.57107749
  0.53400000  -0.57107750
  0.53400000  -0.57107752
  0.53400000  -0.57107753
  0.53400000  -0.57107755
  0.53400000  -0.57107756
  0.53400000  -0.57107757
  0.53400000  -0.57107759
  0.53400000  -0.57107760
  0.53400000  -0.57107762
  0.53400000  -0.57107763
  0.53400000  -0.57107764
  0.53400000  -0.57107766
  0.53400000  -0.57107767
  0.53400000  -0.57107769
  0.53400000  -0.57107770
  0.53400000  -0.57107771
  0.53400000  -0.57107773
  0.53500000  -0.57147432
  0.53500000  -0.57147433
  0.53500000  -0.57147435
  0.53500000  -0.57147436
  0.53500000  -0.57147438
  0.53500000  -0.57147439
  0.53500000  -0.57147441
  0.53500000  -0.57147442
  0.53500000  -0.57147444
  0.53500000  -0.57147445
  0.53500000  -0.57147447
  0.53500000  -0.57147448
  0.53500000  -0.57147449
  0.53500000  -0.57147451
  0.53500000  -0.57147452
  0.53500000  -0.57147454
  0.53500000  -0.57147455
  0.53500000  -0.57147457
  0.53500000  -0.57147458
  0.53500000  -0.57147459
  0.53500000  -0.57147461
  0.53500000  -0.57147462
  0.53500000  -0.57147464
  0.53500000  -0.57147465
  0.53500000  -0.57147466
  0.53500000  -0.57147468
  0.53500000  -0.57147469
  0.53500000  -0.57147471
  0.53500000  -0.57147472
  0.53500000  -0.57147473
  0.53500000  -0.57147475
  0.53500000  -0.57147476
  0.53500000  -0.57147478
  0.53500000  -0.57147479
  0.53500000  -0.57147480
  0.53500000  -0.57147482
  0.53500000  -0.57147483
  0.53500000  -0.57147484
  0.53500000  -0.57147486
  0.53500000  -0.57147487
  0.53600000  -0.57187066
  0.53600000  -0.57187067
  0.53600000  -0.57187069
  0.53600000  -0.57187070
  0.53600000  -0.57187071
  0.53600000  -0.57187073
  0.53600000  -0.57187074
  0.53600000  -0.57187076
  0.53600000  -0.57187077
  0.53600000  -0.57187079
  0.53600000  -0.57187080
  0.53600000  -0.57187082
  0.53600000  -0.57187083
  0.53600000  -0.57187084
  0.53600000  -0.57187086
  0.53600000  -0.57187087
  0.53600000  -0.57187089
  0.53600000  -0.57187090
  0.53600000  -0.57187092
  0.53600000  -0.57187093
  0.53600000  -0.57187094
  0.53600000  -0.57187096
  0.53600000  -0.57187097
  0.53600000  -0.57187099
  0.53600000  -0.57187100
  0.53600000  -0.57187101
  0.53600000  -0.57187103
  0.53600000  -0.57187104
  0.53600000  -0.57187106
  0.53600000  -0.57187107
  0.53600000  -0.57187108
  0.53600000  -0.57187110
  0.53600000  -0.57187111
  0.53600000  -0.57187113
  0.53600000  -0.57187114
  0.53600000  -0.57187115
  0.53600000  -0.57187117
  0.53600000  -0.57187118
  0.53600000  -0.57187119
  0.53600000  -0.57187121
  0.53700000  -0.57226618
  0.53700000  -0.57226620
  0.53700000  -0.57226621
  0.53700000  -0.57226623
  0.53700000  -0.57226624
  0.53700000  -0.57226626
  0.53700000  -0.57226627
  0.53700000  -0.57226629
  0.53700000  -0.57226630
  0.53700000  -0.57226632
  0.53700000  -0.57226633
  0.53700000  -0.57226635
  0.53700000  -0.57226636
  0.53700000  -0.57226637
  0.53700000  -0.57226639
  0.53700000  -0.57226640
  0.53700000  -0.57226642
  0.53700000  -0.57226643
  0.53700000  -0.57226645
  0.53700000  -0.57226646
  0.53700000  -0.57226647
  0.53700000  -0.57226649
  0.53700000  -0.57226650
  0.53700000  -0.57226652
  0.53700000  -0.57226653
  0.53700000  -0.57226654
  0.53700000  -0.57226656
  0.53700000  -0.57226657
  0.53700000  -0.57226659
  0.53700000  -0.57226660
  0.53700000  -0.57226661
  0.53700000  -0.57226663
  0.53700000  -0.57226664
  0.53700000  -0.57226666
  0.53700000  -0.57226667
  0.53700000  -0.57226668
  0.53700000  -0.57226670
  0.53700000  -0.57226671
  0.53700000  -0.57226672
  0.53700000  -0.57226674
  0.53800000  -0.57266091
  0.53800000  -0.57266092
  0.53800000  -0.57266094
  0.53800000  -0.57266095
  0.53800000  -0.57266097
  0.53800000  -0.57266098
  0.53800000  -0.57266100
  0.53800000  -0.57266101
  0.53800000  -0.57266103
  0.53800000  -0.57266104
  0.53800000  -0.57266106
  0.53800000  -0.57266107
  0.53800000  -0.57266108
  0.53800000  -0.57266110
  0.53800000  -0.57266111
  0.53800000  -0.57266113
  0.53800000  -0.57266114
  0.53800000  -0.57266116
  0.53800000  -0.57266117
  0.53800000  -0.57266118
  0.53800000  -0.57266120
  0.53800000  -0.57266121
  0.53800000  -0.57266123
  0.53800000  -0.57266124
  0.53800000  -0.57266125
  0.53800000  -0.57266127
  0.53800000  -0.57266128
  0.53800000  -0.57266130
  0.53800000  -0.57266131
  0.53800000  -0.57266132
  0.53800000  -0.57266134
  0.53800000  -0.57266135
  0.53800000  -0.57266137
  0.53800000  -0.57266138
  0.53800000  -0.57266139
  0.53800000  -0.57266141
  0.53800000  -0.57266142
  0.53800000  -0.57266143
  0.53800000  -0.57266145
  0.53800000  -0.57266146
  0.53900000  -0.57305483
  0.53900000  -0.57305485
  0.53900000  -0.57305486
  0.53900000  -0.57305488
  0.53900000  -0.57305489
  0.53900000  -0.57305491
  0.53900000  -0.57305492
  0.53900000  -0.57305494
  0.53900000  -0.57305495
  0.53900000  -0.57305496
  0.53900000  -0.57305498
  0.53900000  -0.57305499
  0.53900000  -0.57305501
  0.53900000  -0.57305502
  0.53900000  -0.57305504
  0.53900000  -0.57305505
  0.53900000  -0.57305507
  0.53900000  -0.57305508
  0.53900000  -0.57305509
  0.53900000  -0.57305511
  0.53900000  -0.57305512
  0.53900000  -0.57305514
  0.53900000  -0.57305515
  0.53900000  -0.57305516
  0.53900000  -0.57305518
  0.53900000  -0.57305519
  0.53900000  -0.57305521
  0.53900000  -0.57305522
  0.53900000  -0.57305523
  0.53900000  -0.57305525
  0.53900000  -0.57305526
  0.53900000  -0.57305528
  0.53900000  -0.57305529
  0.53900000  -0.57305530
  0.53900000  -0.57305532
  0.53900000  -0.57305533
  0.53900000  -0.57305534
  0.53900000  -0.57305536
  0.53900000  -0.57305537
  0.53900000  -0.57305539
  0.54000000  -0.57344796
  0.54000000  -0.57344797
  0.54000000  -0.57344799
  0.54000000  -0.57344800
  0.54000000  -0.57344802
  0.54000000  -0.57344803
  0.54000000  -0.57344805
  0.54000000  -0.57344806
  0.54000000  -0.57344807
  0.54000000  -0.57344809
  0.54000000  -0.57344810
  0.54000000  -0.57344812
  0.54000000  -0.57344813
  0.54000000  -0.57344815
  0.54000000  -0.57344816
  0.54000000  -0.57344818
  0.54000000  -0.57344819
  0.54000000  -0.57344820
  0.54000000  -0.57344822
  0.54000000  -0.57344823
  0.54000000  -0.57344825
  0.54000000  -0.57344826
  0.54000000  -0.57344827
  0.54000000  -0.57344829
  0.54000000  -0.57344830
  0.54000000  -0.57344832
  0.54000000  -0.57344833
  0.54000000  -0.57344834
  0.54000000  -0.57344836
  0.54000000  -0.57344837
  0.54000000  -0.57344839
  0.54000000  -0.57344840
  0.54000000  -0.57344841
  0.54000000  -0.57344843
  0.54000000  -0.57344844
  0.54000000  -0.57344846
  0.54000000  -0.57344847
  0.54000000  -0.57344848
  0.54000000  -0.57344850
  0.54000000  -0.57344851
  0.54100000  -0.57384029
  0.54100000  -0.57384030
  0.54100000  -0.57384032
  0.54100000  -0.57384033
  0.54100000  -0.57384034
  0.54100000  -0.57384036
  0.54100000  -0.57384037
  0.54100000  -0.57384039
  0.54100000  -0.57384040
  0.54100000  -0.57384042
  0.54100000  -0.57384043
  0.54100000  -0.57384045
  0.54100000  -0.57384046
  0.54100000  -0.57384048
  0.54100000  -0.57384049
  0.54100000  -0.57384050
  0.54100000  -0.57384052
  0.54100000  -0.57384053
  0.54100000  -0.57384055
  0.54100000  -0.57384056
  0.54100000  -0.57384058
  0.54100000  -0.57384059
  0.54100000  -0.57384060
  0.54100000  -0.57384062
  0.54100000  -0.57384063
  0.54100000  -0.57384065
  0.54100000  -0.57384066
  0.54100000  -0.57384067
  0.54100000  -0.57384069
  0.54100000  -0.57384070
  0.54100000  -0.57384072
  0.54100000  -0.57384073
  0.54100000  -0.57384074
  0.54100000  -0.57384076
  0.54100000  -0.57384077
  0.54100000  -0.57384078
  0.54100000  -0.57384080
  0.54100000  -0.57384081
  0.54100000  -0.57384083
  0.54100000  -0.57384084
  0.54200000  -0.57423182
  0.54200000  -0.57423184
  0.54200000  -0.57423185
  0.54200000  -0.57423187
  0.54200000  -0.57423188
  0.54200000  -0.57423189
  0.54200000  -0.57423191
  0.54200000  -0.57423192
  0.54200000  -0.57423194
  0.54200000  -0.57423195
  0.54200000  -0.57423197
  0.54200000  -0.57423198
  0.54200000  -0.57423200
  0.54200000  -0.57423201
  0.54200000  -0.57423202
  0.54200000  -0.57423204
  0.54200000  -0.57423205
  0.54200000  -0.57423207
  0.54200000  -0.57423208
  0.54200000  -0.57423210
  0.54200000  -0.57423211
  0.54200000  -0.57423212
  0.54200000  -0.57423214
  0.54200000  -0.57423215
  0.54200000  -0.57423217
  0.54200000  -0.57423218
  0.54200000  -0.57423219
  0.54200000  -0.57423221
  0.54200000  -0.57423222
  0.54200000  -0.57423224
  0.54200000  -0.57423225
  0.54200000  -0.57423226
  0.54200000  -0.57423228
  0.54200000  -0.57423229
  0.54200000  -0.57423231
  0.54200000  -0.57423232
  0.54200000  -0.57423233
  0.54200000  -0.57423235
  0.54200000  -0.57423236
  0.54200000  -0.57423237
  0.54300000  -0.57462257
  0.54300000  -0.57462258
  0.54300000  -0.57462260
  0.54300000  -0.57462261
  0.54300000  -0.57462262
  0.54300000  -0.57462264
  0.54300000  -0.57462265
  0.54300000  -0.57462267
  0.54300000  -0.57462268
  0.54300000  -0.57462270
  0.54300000  -0.57462271
  0.54300000  -0.57462273
  0.54300000  -0.57462274
  0.54300000  -0.57462275
  0.54300000  -0.57462277
  0.54300000  -0.57462278
  0.54300000  -0.57462280
  0.54300000  -0.57462281
  0.54300000  -0.57462283
  0.54300000  -0.57462284
  0.54300000  -0.57462285
  0.54300000  -0.57462287
  0.54300000  -0.57462288
  0.54300000  -0.57462290
  0.54300000  -0.57462291
  0.54300000  -0.57462293
  0.54300000  -0.57462294
  0.54300000  -0.57462295
  0.54300000  -0.57462297
  0.54300000  -0.57462298
  0.54300000  -0.57462299
  0.54300000  -0.57462301
  0.54300000  -0.57462302
  0.54300000  -0.57462304
  0.54300000  -0.57462305
  0.54300000  -0.57462306
  0.54300000  -0.57462308
  0.54300000  -0.57462309
  0.54300000  -0.57462311
  0.54300000  -0.57462312
  0.54400000  -0.57501252
  0.54400000  -0.57501254
  0.54400000  -0.57501255
  0.54400000  -0.57501257
  0.54400000  -0.57501258
  0.54400000  -0.57501260
  0.54400000  -0.57501261
  0.54400000  -0.57501262
  0.54400000  -0.57501264
  0.54400000  -0.57501265
  0.54400000  -0.57501267
  0.54400000  -0.57501268
  0.54400000  -0.57501270
  0.54400000  -0.57501271
  0.54400000  -0.57501273
  0.54400000  -0.57501274
  0.54400000  -0.57501275
  0.54400000  -0.57501277
  0.54400000  -0.57501278
  0.54400000  -0.57501280
  0.54400000  -0.57501281
  0.54400000  -0.57501283
  0.54400000  -0.57501284
  0.54400000  -0.57501285
  0.54400000  -0.57501287
  0.54400000  -0.57501288
  0.54400000  -0.57501290
  0.54400000  -0.57501291
  0.54400000  -0.57501292
  0.54400000  -0.57501294
  0.54400000  -0.57501295
  0.54400000  -0.57501297
  0.54400000  -0.57501298
  0.54400000  -0.57501299
  0.54400000  -0.57501301
  0.54400000  -0.57501302
  0.54400000  -0.57501303
  0.54400000  -0.57501305
  0.54400000  -0.57501306
  0.54400000  -0.57501308
  0.54500000  -0.57540169
  0.54500000  -0.57540171
  0.54500000  -0.57540172
  0.54500000  -0.57540174
  0.54500000  -0.57540175
  0.54500000  -0.57540177
  0.54500000  -0.57540178
  0.54500000  -0.57540180
  0.54500000  -0.57540181
  0.54500000  -0.57540182
  0.54500000  -0.57540184
  0.54500000  -0.57540185
  0.54500000  -0.57540187
  0.54500000  -0.57540188
  0.54500000  -0.57540190
  0.54500000  -0.57540191
  0.54500000  -0.57540193
  0.54500000  -0.57540194
  0.54500000  -0.57540195
  0.54500000  -0.57540197
  0.54500000  -0.57540198
  0.54500000  -0.57540200
  0.54500000  -0.57540201
  0.54500000  -0.57540202
  0.54500000  -0.57540204
  0.54500000  -0.57540205
  0.54500000  -0.57540207
  0.54500000  -0.57540208
  0.54500000  -0.57540209
  0.54500000  -0.57540211
  0.54500000  -0.57540212
  0.54500000  -0.57540214
  0.54500000  -0.57540215
  0.54500000  -0.57540216
  0.54500000  -0.57540218
  0.54500000  -0.57540219
  0.54500000  -0.57540221
  0.54500000  -0.57540222
  0.54500000  -0.57540223
  0.54500000  -0.57540225
  0.54600000  -0.57579008
  0.54600000  -0.57579010
  0.54600000  -0.57579011
  0.54600000  -0.57579013
  0.54600000  -0.57579014
  0.54600000  -0.57579015
  0.54600000  -0.57579017
  0.54600000  -0.57579018
  0.54600000  -0.57579020
  0.54600000  -0.57579021
  0.54600000  -0.57579023
  0.54600000  -0.57579024
  0.54600000  -0.57579026
  0.54600000  -0.57579027
  0.54600000  -0.57579028
  0.54600000  -0.57579030
  0.54600000  -0.57579031
  0.54600000  -0.57579033
  0.54600000  -0.57579034
  0.54600000  -0.57579036
  0.54600000  -0.57579037
  0.54600000  -0.57579038
  0.54600000  -0.57579040
  0.54600000  -0.57579041
  0.54600000  -0.57579043
  0.54600000  -0.57579044
  0.54600000  -0.57579045
  0.54600000  -0.57579047
  0.54600000  -0.57579048
  0.54600000  -0.57579050
  0.54600000  -0.57579051
  0.54600000  -0.57579052
  0.54600000  -0.57579054
  0.54600000  -0.57579055
  0.54600000  -0.57579057
  0.54600000  -0.57579058
  0.54600000  -0.57579059
  0.54600000  -0.57579061
  0.54600000  -0.57579062
  0.54600000  -0.57579063
  0.54700000  -0.57617769
  0.54700000  -0.57617770
  0.54700000  -0.57617772
  0.54700000  -0.57617773
  0.54700000  -0.57617775
  0.54700000  -0.57617776
  0.54700000  -0.57617778
  0.54700000  -0.57617779
  0.54700000  -0.57617781
  0.54700000  -0.57617782
  0.54700000  -0.57617784
  0.54700000  -0.57617785
  0.54700000  -0.57617786
  0.54700000  -0.57617788
  0.54700000  -0.57617789
  0.54700000  -0.57617791
  0.54700000  -0.57617792
  0.54700000  -0.57617794
  0.54700000  -0.57617795
  0.54700000  -0.57617796
  0.54700000  -0.57617798
  0.54700000  -0.57617799
  0.54700000  -0.57617801
  0.54700000  -0.57617802
  0.54700000  -0.57617803
  0.54700000  -0.57617805
  0.54700000  -0.57617806
  0.54700000  -0.57617808
  0.54700000  -0.57617809
  0.54700000  -0.57617810
  0.54700000  -0.57617812
  0.54700000  -0.57617813
  0.54700000  -0.57617815
  0.54700000  -0.57617816
  0.54700000  -0.57617817
  0.54700000  -0.57617819
  0.54700000  -0.57617820
  0.54700000  -0.57617822
  0.54700000  -0.57617823
  0.54700000  -0.57617824
  0.54800000  -0.57656452
  0.54800000  -0.57656453
  0.54800000  -0.57656455
  0.54800000  -0.57656456
  0.54800000  -0.57656458
  0.54800000  -0.57656459
  0.54800000  -0.57656461
  0.54800000  -0.57656462
  0.54800000  -0.57656464
  0.54800000  -0.57656465
  0.54800000  -0.57656467
  0.54800000  -0.57656468
  0.54800000  -0.57656469
  0.54800000  -0.57656471
  0.54800000  -0.57656472
  0.54800000  -0.57656474
  0.54800000  -0.57656475
  0.54800000  -0.57656477
  0.54800000  -0.57656478
  0.54800000  -0.57656479
  0.54800000  -0.57656481
  0.54800000  -0.57656482
  0.54800000  -0.57656484
  0.54800000  -0.57656485
  0.54800000  -0.57656487
  0.54800000  -0.57656488
  0.54800000  -0.57656489
  0.54800000  -0.57656491
  0.54800000  -0.57656492
  0.54800000  -0.57656494
  0.54800000  -0.57656495
  0.54800000  -0.57656496
  0.54800000  -0.57656498
  0.54800000  -0.57656499
  0.54800000  -0.57656500
  0.54800000  -0.57656502
  0.54800000  -0.57656503
  0.54800000  -0.57656505
  0.54800000  -0.57656506
  0.54800000  -0.57656507
  0.54900000  -0.57695058
  0.54900000  -0.57695059
  0.54900000  -0.57695060
  0.54900000  -0.57695062
  0.54900000  -0.57695063
  0.54900000  -0.57695065
  0.54900000  -0.57695066
  0.54900000  -0.57695068
  0.54900000  -0.57695069
  0.54900000  -0.57695071
  0.54900000  -0.57695072
  0.54900000  -0.57695074
  0.54900000  -0.57695075
  0.54900000  -0.57695076
  0.54900000  -0.57695078
  0.54900000  -0.57695079
  0.54900000  -0.57695081
  0.54900000  -0.57695082
  0.54900000  -0.57695084
  0.54900000  -0.57695085
  0.54900000  -0.57695086
  0.54900000  -0.57695088
  0.54900000  -0.57695089
  0.54900000  -0.57695091
  0.54900000  -0.57695092
  0.54900000  -0.57695094
  0.54900000  -0.57695095
  0.54900000  -0.57695096
  0.54900000  -0.57695098
  0.54900000  -0.57695099
  0.54900000  -0.57695101
  0.54900000  -0.57695102
  0.54900000  -0.57695103
  0.54900000  -0.57695105
  0.54900000  -0.57695106
  0.54900000  -0.57695107
  0.54900000  -0.57695109
  0.54900000  -0.57695110
  0.54900000  -0.57695112
  0.54900000  -0.57695113
  0.55000000  -0.57733586
  0.55000000  -0.57733587
  0.55000000  -0.57733589
  0.55000000  -0.57733590
  0.55000000  -0.57733592
  0.55000000  -0.57733593
  0.55000000  -0.57733595
  0.55000000  -0.57733596
  0.55000000  -0.57733598
  0.55000000  -0.57733599
  0.55000000  -0.57733600
  0.55000000  -0.57733602
  0.55000000  -0.57733603
  0.55000000  -0.57733605
  0.55000000  -0.57733606
  0.55000000  -0.57733608
  0.55000000  -0.57733609
  0.55000000  -0.57733611
  0.55000000  -0.57733612
  0.55000000  -0.57733613
  0.55000000  -0.57733615
  0.55000000  -0.57733616
  0.55000000  -0.57733618
  0.55000000  -0.57733619
  0.55000000  -0.57733620
  0.55000000  -0.57733622
  0.55000000  -0.57733623
  0.55000000  -0.57733625
  0.55000000  -0.57733626
  0.55000000  -0.57733627
  0.55000000  -0.57733629
  0.55000000  -0.57733630
  0.55000000  -0.57733632
  0.55000000  -0.57733633
  0.55000000  -0.57733634
  0.55000000  -0.57733636
  0.55000000  -0.57733637
  0.55000000  -0.57733638
  0.55000000  -0.57733640
  0.55000000  -0.57733641
  0.55100000  -0.57772037
  0.55100000  -0.57772039
  0.55100000  -0.57772040
  0.55100000  -0.57772042
  0.55100000  -0.57772043
  0.55100000  -0.57772045
  0.55100000  -0.57772046
  0.55100000  -0.57772047
  0.55100000  -0.57772049
  0.55100000  -0.57772050
  0.55100000  -0.57772052
  0.55100000  -0.57772053
  0.55100000  -0.57772055
  0.55100000  -0.57772056
  0.55100000  -0.57772058
  0.55100000  -0.57772059
  0.55100000  -0.57772060
  0.55100000  -0.57772062
  0.55100000  -0.57772063
  0.55100000  -0.57772065
  0.55100000  -0.57772066
  0.55100000  -0.57772068
  0.55100000  -0.57772069
  0.55100000  -0.57772070
  0.55100000  -0.57772072
  0.55100000  -0.57772073
  0.55100000  -0.57772075
  0.55100000  -0.57772076
  0.55100000  -0.57772077
  0.55100000  -0.57772079
  0.55100000  -0.57772080
  0.55100000  -0.57772082
  0.55100000  -0.57772083
  0.55100000  -0.57772084
  0.55100000  -0.57772086
  0.55100000  -0.57772087
  0.55100000  -0.57772088
  0.55100000  -0.57772090
  0.55100000  -0.57772091
  0.55100000  -0.57772093
  0.55200000  -0.57810412
  0.55200000  -0.57810413
  0.55200000  -0.57810415
  0.55200000  -0.57810416
  0.55200000  -0.57810418
  0.55200000  -0.57810419
  0.55200000  -0.57810421
  0.55200000  -0.57810422
  0.55200000  -0.57810424
  0.55200000  -0.57810425
  0.55200000  -0.57810426
  0.55200000  -0.57810428
  0.55200000  -0.57810429
  0.55200000  -0.57810431
  0.55200000  -0.57810432
  0.55200000  -0.57810434
  0.55200000  -0.57810435
  0.55200000  -0.57810437
  0.55200000  -0.57810438
  0.55200000  -0.57810439
  0.55200000  -0.57810441
  0.55200000  -0.57810442
  0.55200000  -0.57810444
  0.55200000  -0.57810445
  0.55200000  -0.57810446
  0.55200000  -0.57810448
  0.55200000  -0.57810449
  0.55200000  -0.57810451
  0.55200000  -0.57810452
  0.55200000  -0.57810453
  0.55200000  -0.57810455
  0.55200000  -0.57810456
  0.55200000  -0.57810458
  0.55200000  -0.57810459
  0.55200000  -0.57810460
  0.55200000  -0.57810462
  0.55200000  -0.57810463
  0.55200000  -0.57810464
  0.55200000  -0.57810466
  0.55200000  -0.57810467
  0.55300000  -0.57848710
  0.55300000  -0.57848711
  0.55300000  -0.57848713
  0.55300000  -0.57848714
  0.55300000  -0.57848716
  0.55300000  -0.57848717
  0.55300000  -0.57848719
  0.55300000  -0.57848720
  0.55300000  -0.57848722
  0.55300000  -0.57848723
  0.55300000  -0.57848725
  0.55300000  -0.57848726
  0.55300000  -0.57848728
  0.55300000  -0.57848729
  0.55300000  -0.57848730
  0.55300000  -0.57848732
  0.55300000  -0.57848733
  0.55300000  -0.57848735
  0.55300000  -0.57848736
  0.55300000  -0.57848738
  0.55300000  -0.57848739
  0.55300000  -0.57848740
  0.55300000  -0.57848742
  0.55300000  -0.57848743
  0.55300000  -0.57848745
  0.55300000  -0.57848746
  0.55300000  -0.57848747
  0.55300000  -0.57848749
  0.55300000  -0.57848750
  0.55300000  -0.57848752
  0.55300000  -0.57848753
  0.55300000  -0.57848754
  0.55300000  -0.57848756
  0.55300000  -0.57848757
  0.55300000  -0.57848759
  0.55300000  -0.57848760
  0.55300000  -0.57848761
  0.55300000  -0.57848763
  0.55300000  -0.57848764
  0.55300000  -0.57848765
  0.55400000  -0.57886932
  0.55400000  -0.57886933
  0.55400000  -0.57886935
  0.55400000  -0.57886936
  0.55400000  -0.57886938
  0.55400000  -0.57886939
  0.55400000  -0.57886941
  0.55400000  -0.57886942
  0.55400000  -0.57886944
  0.55400000  -0.57886945
  0.55400000  -0.57886947
  0.55400000  -0.57886948
  0.55400000  -0.57886949
  0.55400000  -0.57886951
  0.55400000  -0.57886952
  0.55400000  -0.57886954
  0.55400000  -0.57886955
  0.55400000  -0.57886957
  0.55400000  -0.57886958
  0.55400000  -0.57886959
  0.55400000  -0.57886961
  0.55400000  -0.57886962
  0.55400000  -0.57886964
  0.55400000  -0.57886965
  0.55400000  -0.57886967
  0.55400000  -0.57886968
  0.55400000  -0.57886969
  0.55400000  -0.57886971
  0.55400000  -0.57886972
  0.55400000  -0.57886974
  0.55400000  -0.57886975
  0.55400000  -0.57886976
  0.55400000  -0.57886978
  0.55400000  -0.57886979
  0.55400000  -0.57886980
  0.55400000  -0.57886982
  0.55400000  -0.57886983
  0.55400000  -0.57886985
  0.55400000  -0.57886986
  0.55400000  -0.57886987
  0.55500000  -0.57925078
  0.55500000  -0.57925079
  0.55500000  -0.57925081
  0.55500000  -0.57925082
  0.55500000  -0.57925084
  0.55500000  -0.57925085
  0.55500000  -0.57925087
  0.55500000  -0.57925088
  0.55500000  -0.57925090
  0.55500000  -0.57925091
  0.55500000  -0.57925093
  0.55500000  -0.57925094
  0.55500000  -0.57925095
  0.55500000  -0.57925097
  0.55500000  -0.57925098
  0.55500000  -0.57925100
  0.55500000  -0.57925101
  0.55500000  -0.57925103
  0.55500000  -0.57925104
  0.55500000  -0.57925105
  0.55500000  -0.57925107
  0.55500000  -0.57925108
  0.55500000  -0.57925110
  0.55500000  -0.57925111
  0.55500000  -0.57925113
  0.55500000  -0.57925114
  0.55500000  -0.57925115
  0.55500000  -0.57925117
  0.55500000  -0.57925118
  0.55500000  -0.57925120
  0.55500000  -0.57925121
  0.55500000  -0.57925122
  0.55500000  -0.57925124
  0.55500000  -0.57925125
  0.55500000  -0.57925126
  0.55500000  -0.57925128
  0.55500000  -0.57925129
  0.55500000  -0.57925131
  0.55500000  -0.57925132
  0.55500000  -0.57925133
  0.55600000  -0.57963148
  0.55600000  -0.57963150
  0.55600000  -0.57963151
  0.55600000  -0.57963153
  0.55600000  -0.57963154
  0.55600000  -0.57963156
  0.55600000  -0.57963157
  0.55600000  -0.57963158
  0.55600000  -0.57963160
  0.55600000  -0.57963161
  0.55600000  -0.57963163
  0.55600000  -0.57963164
  0.55600000  -0.57963166
  0.55600000  -0.57963167
  0.55600000  -0.57963169
  0.55600000  -0.57963170
  0.55600000  -0.57963171
  0.55600000  -0.57963173
  0.55600000  -0.57963174
  0.55600000  -0.57963176
  0.55600000  -0.57963177
  0.55600000  -0.57963179
  0.55600000  -0.57963180
  0.55600000  -0.57963181
  0.55600000  -0.57963183
  0.55600000  -0.57963184
  0.55600000  -0.57963186
  0.55600000  -0.57963187
  0.55600000  -0.57963188
  0.55600000  -0.57963190
  0.55600000  -0.57963191
  0.55600000  -0.57963193
  0.55600000  -0.57963194
  0.55600000  -0.57963195
  0.55600000  -0.57963197
  0.55600000  -0.57963198
  0.55600000  -0.57963200
  0.55600000  -0.57963201
  0.55600000  -0.57963202
  0.55600000  -0.57963204
  0.55700000  -0.58001143
  0.55700000  -0.58001145
  0.55700000  -0.58001146
  0.55700000  -0.58001147
  0.55700000  -0.58001149
  0.55700000  -0.58001150
  0.55700000  -0.58001152
  0.55700000  -0.58001153
  0.55700000  -0.58001155
  0.55700000  -0.58001156
  0.55700000  -0.58001158
  0.55700000  -0.58001159
  0.55700000  -0.58001161
  0.55700000  -0.58001162
  0.55700000  -0.58001163
  0.55700000  -0.58001165
  0.55700000  -0.58001166
  0.55700000  -0.58001168
  0.55700000  -0.58001169
  0.55700000  -0.58001171
  0.55700000  -0.58001172
  0.55700000  -0.58001173
  0.55700000  -0.58001175
  0.55700000  -0.58001176
  0.55700000  -0.58001178
  0.55700000  -0.58001179
  0.55700000  -0.58001180
  0.55700000  -0.58001182
  0.55700000  -0.58001183
  0.55700000  -0.58001185
  0.55700000  -0.58001186
  0.55700000  -0.58001187
  0.55700000  -0.58001189
  0.55700000  -0.58001190
  0.55700000  -0.58001192
  0.55700000  -0.58001193
  0.55700000  -0.58001194
  0.55700000  -0.58001196
  0.55700000  -0.58001197
  0.55700000  -0.58001198
  0.55800000  -0.58039063
  0.55800000  -0.58039064
  0.55800000  -0.58039066
  0.55800000  -0.58039067
  0.55800000  -0.58039069
  0.55800000  -0.58039070
  0.55800000  -0.58039071
  0.55800000  -0.58039073
  0.55800000  -0.58039074
  0.55800000  -0.58039076
  0.55800000  -0.58039077
  0.55800000  -0.58039079
  0.55800000  -0.58039080
  0.55800000  -0.58039082
  0.55800000  -0.58039083
  0.55800000  -0.58039084
  0.55800000  -0.58039086
  0.55800000  -0.58039087
  0.55800000  -0.58039089
  0.55800000  -0.58039090
  0.55800000  -0.58039092
  0.55800000  -0.58039093
  0.55800000  -0.58039094
  0.55800000  -0.58039096
  0.55800000  -0.58039097
  0.55800000  -0.58039099
  0.55800000  -0.58039100
  0.55800000  -0.58039101
  0.55800000  -0.58039103
  0.55800000  -0.58039104
  0.55800000  -0.58039106
  0.55800000  -0.58039107
  0.55800000  -0.58039108
  0.55800000  -0.58039110
  0.55800000  -0.58039111
  0.55800000  -0.58039113
  0.55800000  -0.58039114
  0.55800000  -0.58039115
  0.55800000  -0.58039117
  0.55800000  -0.58039118
  0.55900000  -0.58076907
  0.55900000  -0.58076909
  0.55900000  -0.58076910
  0.55900000  -0.58076912
  0.55900000  -0.58076913
  0.55900000  -0.58076915
  0.55900000  -0.58076916
  0.55900000  -0.58076918
  0.55900000  -0.58076919
  0.55900000  -0.58076920
  0.55900000  -0.58076922
  0.55900000  -0.58076923
  0.55900000  -0.58076925
  0.55900000  -0.58076926
  0.55900000  -0.58076928
  0.55900000  -0.58076929
  0.55900000  -0.58076931
  0.55900000  -0.58076932
  0.55900000  -0.58076933
  0.55900000  -0.58076935
  0.55900000  -0.58076936
  0.55900000  -0.58076938
  0.55900000  -0.58076939
  0.55900000  -0.58076941
  0.55900000  -0.58076942
  0.55900000  -0.58076943
  0.55900000  -0.58076945
  0.55900000  -0.58076946
  0.55900000  -0.58076948
  0.55900000  -0.58076949
  0.55900000  -0.58076950
  0.55900000  -0.58076952
  0.55900000  -0.58076953
  0.55900000  -0.58076954
  0.55900000  -0.58076956
  0.55900000  -0.58076957
  0.55900000  -0.58076959
  0.55900000  -0.58076960
  0.55900000  -0.58076961
  0.55900000  -0.58076963
  0.56000000  -0.58114677
  0.56000000  -0.58114679
  0.56000000  -0.58114680
  0.56000000  -0.58114682
  0.56000000  -0.58114683
  0.56000000  -0.58114685
  0.56000000  -0.58114686
  0.56000000  -0.58114687
  0.56000000  -0.58114689
  0.56000000  -0.58114690
  0.56000000  -0.58114692
  0.56000000  -0.58114693
  0.56000000  -0.58114695
  0.56000000  -0.58114696
  0.56000000  -0.58114698
  0.56000000  -0.58114699
  0.56000000  -0.58114700
  0.56000000  -0.58114702
  0.56000000  -0.58114703
  0.56000000  -0.58114705
  0.56000000  -0.58114706
  0.56000000  -0.58114708
  0.56000000  -0.58114709
  0.56000000  -0.58114710
  0.56000000  -0.58114712
  0.56000000  -0.58114713
  0.56000000  -0.58114715
  0.56000000  -0.58114716
  0.56000000  -0.58114717
  0.56000000  -0.58114719
  0.56000000  -0.58114720
  0.56000000  -0.58114722
  0.56000000  -0.58114723
  0.56000000  -0.58114724
  0.56000000  -0.58114726
  0.56000000  -0.58114727
  0.56000000  -0.58114729
  0.56000000  -0.58114730
  0.56000000  -0.58114731
  0.56000000  -0.58114733
  0.56100000  -0.58152373
  0.56100000  -0.58152374
  0.56100000  -0.58152376
  0.56100000  -0.58152377
  0.56100000  -0.58152379
  0.56100000  -0.58152380
  0.56100000  -0.58152381
  0.56100000  -0.58152383
  0.56100000  -0.58152384
  0.56100000  -0.58152386
  0.56100000  -0.58152387
  0.56100000  -0.58152389
  0.56100000  -0.58152390
  0.56100000  -0.58152392
  0.56100000  -0.58152393
  0.56100000  -0.58152395
  0.56100000  -0.58152396
  0.56100000  -0.58152397
  0.56100000  -0.58152399
  0.56100000  -0.58152400
  0.56100000  -0.58152402
  0.56100000  -0.58152403
  0.56100000  -0.58152404
  0.56100000  -0.58152406
  0.56100000  -0.58152407
  0.56100000  -0.58152409
  0.56100000  -0.58152410
  0.56100000  -0.58152412
  0.56100000  -0.58152413
  0.56100000  -0.58152414
  0.56100000  -0.58152416
  0.56100000  -0.58152417
  0.56100000  -0.58152418
  0.56100000  -0.58152420
  0.56100000  -0.58152421
  0.56100000  -0.58152423
  0.56100000  -0.58152424
  0.56100000  -0.58152425
  0.56100000  -0.58152427
  0.56100000  -0.58152428
  0.56200000  -0.58189994
  0.56200000  -0.58189995
  0.56200000  -0.58189997
  0.56200000  -0.58189998
  0.56200000  -0.58190000
  0.56200000  -0.58190001
  0.56200000  -0.58190003
  0.56200000  -0.58190004
  0.56200000  -0.58190006
  0.56200000  -0.58190007
  0.56200000  -0.58190009
  0.56200000  -0.58190010
  0.56200000  -0.58190011
  0.56200000  -0.58190013
  0.56200000  -0.58190014
  0.56200000  -0.58190016
  0.56200000  -0.58190017
  0.56200000  -0.58190019
  0.56200000  -0.58190020
  0.56200000  -0.58190021
  0.56200000  -0.58190023
  0.56200000  -0.58190024
  0.56200000  -0.58190026
  0.56200000  -0.58190027
  0.56200000  -0.58190029
  0.56200000  -0.58190030
  0.56200000  -0.58190031
  0.56200000  -0.58190033
  0.56200000  -0.58190034
  0.56200000  -0.58190036
  0.56200000  -0.58190037
  0.56200000  -0.58190038
  0.56200000  -0.58190040
  0.56200000  -0.58190041
  0.56200000  -0.58190042
  0.56200000  -0.58190044
  0.56200000  -0.58190045
  0.56200000  -0.58190047
  0.56200000  -0.58190048
  0.56200000  -0.58190049
  0.56300000  -0.58227541
  0.56300000  -0.58227543
  0.56300000  -0.58227544
  0.56300000  -0.58227546
  0.56300000  -0.58227547
  0.56300000  -0.58227548
  0.56300000  -0.58227550
  0.56300000  -0.58227551
  0.56300000  -0.58227553
  0.56300000  -0.58227554
  0.56300000  -0.58227556
  0.56300000  -0.58227557
  0.56300000  -0.58227559
  0.56300000  -0.58227560
  0.56300000  -0.58227562
  0.56300000  -0.58227563
  0.56300000  -0.58227564
  0.56300000  -0.58227566
  0.56300000  -0.58227567
  0.56300000  -0.58227569
  0.56300000  -0.58227570
  0.56300000  -0.58227572
  0.56300000  -0.58227573
  0.56300000  -0.58227574
  0.56300000  -0.58227576
  0.56300000  -0.58227577
  0.56300000  -0.58227579
  0.56300000  -0.58227580
  0.56300000  -0.58227581
  0.56300000  -0.58227583
  0.56300000  -0.58227584
  0.56300000  -0.58227586
  0.56300000  -0.58227587
  0.56300000  -0.58227588
  0.56300000  -0.58227590
  0.56300000  -0.58227591
  0.56300000  -0.58227592
  0.56300000  -0.58227594
  0.56300000  -0.58227595
  0.56300000  -0.58227597
  0.56400000  -0.58265015
  0.56400000  -0.58265016
  0.56400000  -0.58265018
  0.56400000  -0.58265019
  0.56400000  -0.58265021
  0.56400000  -0.58265022
  0.56400000  -0.58265023
  0.56400000  -0.58265025
  0.56400000  -0.58265026
  0.56400000  -0.58265028
  0.56400000  -0.58265029
  0.56400000  -0.58265031
  0.56400000  -0.58265032
  0.56400000  -0.58265034
  0.56400000  -0.58265035
  0.56400000  -0.58265036
  0.56400000  -0.58265038
  0.56400000  -0.58265039
  0.56400000  -0.58265041
  0.56400000  -0.58265042
  0.56400000  -0.58265044
  0.56400000  -0.58265045
  0.56400000  -0.58265046
  0.56400000  -0.58265048
  0.56400000  -0.58265049
  0.56400000  -0.58265051
  0.56400000  -0.58265052
  0.56400000  -0.58265053
  0.56400000  -0.58265055
  0.56400000  -0.58265056
  0.56400000  -0.58265058
  0.56400000  -0.58265059
  0.56400000  -0.58265060
  0.56400000  -0.58265062
  0.56400000  -0.58265063
  0.56400000  -0.58265065
  0.56400000  -0.58265066
  0.56400000  -0.58265067
  0.56400000  -0.58265069
  0.56400000  -0.58265070
  0.56500000  -0.58302415
  0.56500000  -0.58302416
  0.56500000  -0.58302418
  0.56500000  -0.58302419
  0.56500000  -0.58302420
  0.56500000  -0.58302422
  0.56500000  -0.58302423
  0.56500000  -0.58302425
  0.56500000  -0.58302426
  0.56500000  -0.58302428
  0.56500000  -0.58302429
  0.56500000  -0.58302431
  0.56500000  -0.58302432
  0.56500000  -0.58302434
  0.56500000  -0.58302435
  0.56500000  -0.58302436
  0.56500000  -0.58302438
  0.56500000  -0.58302439
  0.56500000  -0.58302441
  0.56500000  -0.58302442
  0.56500000  -0.58302444
  0.56500000  -0.58302445
  0.56500000  -0.58302446
  0.56500000  -0.58302448
  0.56500000  -0.58302449
  0.56500000  -0.58302451
  0.56500000  -0.58302452
  0.56500000  -0.58302453
  0.56500000  -0.58302455
  0.56500000  -0.58302456
  0.56500000  -0.58302458
  0.56500000  -0.58302459
  0.56500000  -0.58302460
  0.56500000  -0.58302462
  0.56500000  -0.58302463
  0.56500000  -0.58302465
  0.56500000  -0.58302466
  0.56500000  -0.58302467
  0.56500000  -0.58302469
  0.56500000  -0.58302470
  0.56600000  -0.58339741
  0.56600000  -0.58339743
  0.56600000  -0.58339744
  0.56600000  -0.58339746
  0.56600000  -0.58339747
  0.56600000  -0.58339749
  0.56600000  -0.58339750
  0.56600000  -0.58339752
  0.56600000  -0.58339753
  0.56600000  -0.58339755
  0.56600000  -0.58339756
  0.56600000  -0.58339757
  0.56600000  -0.58339759
  0.56600000  -0.58339760
  0.56600000  -0.58339762
  0.56600000  -0.58339763
  0.56600000  -0.58339765
  0.56600000  -0.58339766
  0.56600000  -0.58339767
  0.56600000  -0.58339769
  0.56600000  -0.58339770
  0.56600000  -0.58339772
  0.56600000  -0.58339773
  0.56600000  -0.58339775
  0.56600000  -0.58339776
  0.56600000  -0.58339777
  0.56600000  -0.58339779
  0.56600000  -0.58339780
  0.56600000  -0.58339782
  0.56600000  -0.58339783
  0.56600000  -0.58339784
  0.56600000  -0.58339786
  0.56600000  -0.58339787
  0.56600000  -0.58339789
  0.56600000  -0.58339790
  0.56600000  -0.58339791
  0.56600000  -0.58339793
  0.56600000  -0.58339794
  0.56600000  -0.58339795
  0.56600000  -0.58339797
  0.56700000  -0.58376995
  0.56700000  -0.58376996
  0.56700000  -0.58376998
  0.56700000  -0.58376999
  0.56700000  -0.58377001
  0.56700000  -0.58377002
  0.56700000  -0.58377004
  0.56700000  -0.58377005
  0.56700000  -0.58377007
  0.56700000  -0.58377008
  0.56700000  -0.58377010
  0.56700000  -0.58377011
  0.56700000  -0.58377013
  0.56700000  -0.58377014
  0.56700000  -0.58377015
  0.56700000  -0.58377017
  0.56700000  -0.58377018
  0.56700000  -0.58377020
  0.56700000  -0.58377021
  0.56700000  -0.58377023
  0.56700000  -0.58377024
  0.56700000  -0.58377025
  0.56700000  -0.58377027
  0.56700000  -0.58377028
  0.56700000  -0.58377030
  0.56700000  -0.58377031
  0.56700000  -0.58377032
  0.56700000  -0.58377034
  0.56700000  -0.58377035
  0.56700000  -0.58377037
  0.56700000  -0.58377038
  0.56700000  -0.58377039
  0.56700000  -0.58377041
  0.56700000  -0.58377042
  0.56700000  -0.58377044
  0.56700000  -0.58377045
  0.56700000  -0.58377046
  0.56700000  -0.58377048
  0.56700000  -0.58377049
  0.56700000  -0.58377050
  0.56800000  -0.58414176
  0.56800000  -0.58414177
  0.56800000  -0.58414179
  0.56800000  -0.58414180
  0.56800000  -0.58414182
  0.56800000  -0.58414183
  0.56800000  -0.58414185
  0.56800000  -0.58414186
  0.56800000  -0.58414188
  0.56800000  -0.58414189
  0.56800000  -0.58414191
  0.56800000  -0.58414192
  0.56800000  -0.58414193
  0.56800000  -0.58414195
  0.56800000  -0.58414196
  0.56800000  -0.58414198
  0.56800000  -0.58414199
  0.56800000  -0.58414201
  0.56800000  -0.58414202
  0.56800000  -0.58414203
  0.56800000  -0.58414205
  0.56800000  -0.58414206
  0.56800000  -0.58414208
  0.56800000  -0.58414209
  0.56800000  -0.58414211
  0.56800000  -0.58414212
  0.56800000  -0.58414213
  0.56800000  -0.58414215
  0.56800000  -0.58414216
  0.56800000  -0.58414218
  0.56800000  -0.58414219
  0.56800000  -0.58414220
  0.56800000  -0.58414222
  0.56800000  -0.58414223
  0.56800000  -0.58414225
  0.56800000  -0.58414226
  0.56800000  -0.58414227
  0.56800000  -0.58414229
  0.56800000  -0.58414230
  0.56800000  -0.58414231
  0.56900000  -0.58451284
  0.56900000  -0.58451286
  0.56900000  -0.58451287
  0.56900000  -0.58451289
  0.56900000  -0.58451290
  0.56900000  -0.58451292
  0.56900000  -0.58451293
  0.56900000  -0.58451295
  0.56900000  -0.58451296
  0.56900000  -0.58451297
  0.56900000  -0.58451299
  0.56900000  -0.58451300
  0.56900000  -0.58451302
  0.56900000  -0.58451303
  0.56900000  -0.58451305
  0.56900000  -0.58451306
  0.56900000  -0.58451308
  0.56900000  -0.58451309
  0.56900000  -0.58451310
  0.56900000  -0.58451312
  0.56900000  -0.58451313
  0.56900000  -0.58451315
  0.56900000  -0.58451316
  0.56900000  -0.58451318
  0.56900000  -0.58451319
  0.56900000  -0.58451320
  0.56900000  -0.58451322
  0.56900000  -0.58451323
  0.56900000  -0.58451325
  0.56900000  -0.58451326
  0.56900000  -0.58451327
  0.56900000  -0.58451329
  0.56900000  -0.58451330
  0.56900000  -0.58451331
  0.56900000  -0.58451333
  0.56900000  -0.58451334
  0.56900000  -0.58451336
  0.56900000  -0.58451337
  0.56900000  -0.58451338
  0.56900000  -0.58451340
  0.57000000  -0.58488320
  0.57000000  -0.58488322
  0.57000000  -0.58488323
  0.57000000  -0.58488325
  0.57000000  -0.58488326
  0.57000000  -0.58488328
  0.57000000  -0.58488329
  0.57000000  -0.58488331
  0.57000000  -0.58488332
  0.57000000  -0.58488333
  0.57000000  -0.58488335
  0.57000000  -0.58488336
  0.57000000  -0.58488338
  0.57000000  -0.58488339
  0.57000000  -0.58488341
  0.57000000  -0.58488342
  0.57000000  -0.58488344
  0.57000000  -0.58488345
  0.57000000  -0.58488346
  0.57000000  -0.58488348
  0.57000000  -0.58488349
  0.57000000  -0.58488351
  0.57000000  -0.58488352
  0.57000000  -0.58488354
  0.57000000  -0.58488355
  0.57000000  -0.58488356
  0.57000000  -0.58488358
  0.57000000  -0.58488359
  0.57000000  -0.58488361
  0.57000000  -0.58488362
  0.57000000  -0.58488363
  0.57000000  -0.58488365
  0.57000000  -0.58488366
  0.57000000  -0.58488368
  0.57000000  -0.58488369
  0.57000000  -0.58488370
  0.57000000  -0.58488372
  0.57000000  -0.58488373
  0.57000000  -0.58488374
  0.57000000  -0.58488376
  0.57100000  -0.58525284
  0.57100000  -0.58525286
  0.57100000  -0.58525287
  0.57100000  -0.58525289
  0.57100000  -0.58525290
  0.57100000  -0.58525292
  0.57100000  -0.58525293
  0.57100000  -0.58525294
  0.57100000  -0.58525296
  0.57100000  -0.58525297
  0.57100000  -0.58525299
  0.57100000  -0.58525300
  0.57100000  -0.58525302
  0.57100000  -0.58525303
  0.57100000  -0.58525305
  0.57100000  -0.58525306
  0.57100000  -0.58525308
  0.57100000  -0.58525309
  0.57100000  -0.58525310
  0.57100000  -0.58525312
  0.57100000  -0.58525313
  0.57100000  -0.58525315
  0.57100000  -0.58525316
  0.57100000  -0.58525317
  0.57100000  -0.58525319
  0.57100000  -0.58525320
  0.57100000  -0.58525322
  0.57100000  -0.58525323
  0.57100000  -0.58525324
  0.57100000  -0.58525326
  0.57100000  -0.58525327
  0.57100000  -0.58525329
  0.57100000  -0.58525330
  0.57100000  -0.58525331
  0.57100000  -0.58525333
  0.57100000  -0.58525334
  0.57100000  -0.58525336
  0.57100000  -0.58525337
  0.57100000  -0.58525338
  0.57100000  -0.58525340
  0.57200000  -0.58562176
  0.57200000  -0.58562178
  0.57200000  -0.58562179
  0.57200000  -0.58562181
  0.57200000  -0.58562182
  0.57200000  -0.58562184
  0.57200000  -0.58562185
  0.57200000  -0.58562187
  0.57200000  -0.58562188
  0.57200000  -0.58562189
  0.57200000  -0.58562191
  0.57200000  -0.58562192
  0.57200000  -0.58562194
  0.57200000  -0.58562195
  0.57200000  -0.58562197
  0.57200000  -0.58562198
  0.57200000  -0.58562200
  0.57200000  -0.58562201
  0.57200000  -0.58562202
  0.57200000  -0.58562204
  0.57200000  -0.58562205
  0.57200000  -0.58562207
  0.57200000  -0.58562208
  0.57200000  -0.58562210
  0.57200000  -0.58562211
  0.57200000  -0.58562212
  0.57200000  -0.58562214
  0.57200000  -0.58562215
  0.57200000  -0.58562217
  0.57200000  -0.58562218
  0.57200000  -0.58562219
  0.57200000  -0.58562221
  0.57200000  -0.58562222
  0.57200000  -0.58562224
  0.57200000  -0.58562225
  0.57200000  -0.58562226
  0.57200000  -0.58562228
  0.57200000  -0.58562229
  0.57200000  -0.58562230
  0.57200000  -0.58562232
  0.57300000  -0.58598997
  0.57300000  -0.58598998
  0.57300000  -0.58599000
  0.57300000  -0.58599001
  0.57300000  -0.58599003
  0.57300000  -0.58599004
  0.57300000  -0.58599006
  0.57300000  -0.58599007
  0.57300000  -0.58599008
  0.57300000  -0.58599010
  0.57300000  -0.58599011
  0.57300000  -0.58599013
  0.57300000  -0.58599014
  0.57300000  -0.58599016
  0.57300000  -0.58599017
  0.57300000  -0.58599019
  0.57300000  -0.58599020
  0.57300000  -0.58599021
  0.57300000  -0.58599023
  0.57300000  -0.58599024
  0.57300000  -0.58599026
  0.57300000  -0.58599027
  0.57300000  -0.58599029
  0.57300000  -0.58599030
  0.57300000  -0.58599031
  0.57300000  -0.58599033
  0.57300000  -0.58599034
  0.57300000  -0.58599036
  0.57300000  -0.58599037
  0.57300000  -0.58599038
  0.57300000  -0.58599040
  0.57300000  -0.58599041
  0.57300000  -0.58599043
  0.57300000  -0.58599044
  0.57300000  -0.58599045
  0.57300000  -0.58599047
  0.57300000  -0.58599048
  0.57300000  -0.58599050
  0.57300000  -0.58599051
  0.57300000  -0.58599052
  0.57400000  -0.58635746
  0.57400000  -0.58635747
  0.57400000  -0.58635749
  0.57400000  -0.58635750
  0.57400000  -0.58635752
  0.57400000  -0.58635753
  0.57400000  -0.58635755
  0.57400000  -0.58635756
  0.57400000  -0.58635758
  0.57400000  -0.58635759
  0.57400000  -0.58635760
  0.57400000  -0.58635762
  0.57400000  -0.58635763
  0.57400000  -0.58635765
  0.57400000  -0.58635766
  0.57400000  -0.58635768
  0.57400000  -0.58635769
  0.57400000  -0.58635771
  0.57400000  -0.58635772
  0.57400000  -0.58635773
  0.57400000  -0.58635775
  0.57400000  -0.58635776
  0.57400000  -0.58635778
  0.57400000  -0.58635779
  0.57400000  -0.58635780
  0.57400000  -0.58635782
  0.57400000  -0.58635783
  0.57400000  -0.58635785
  0.57400000  -0.58635786
  0.57400000  -0.58635787
  0.57400000  -0.58635789
  0.57400000  -0.58635790
  0.57400000  -0.58635792
  0.57400000  -0.58635793
  0.57400000  -0.58635794
  0.57400000  -0.58635796
  0.57400000  -0.58635797
  0.57400000  -0.58635799
  0.57400000  -0.58635800
  0.57400000  -0.58635801
  0.57500000  -0.58672424
  0.57500000  -0.58672425
  0.57500000  -0.58672427
  0.57500000  -0.58672428
  0.57500000  -0.58672430
  0.57500000  -0.58672431
  0.57500000  -0.58672433
  0.57500000  -0.58672434
  0.57500000  -0.58672435
  0.57500000  -0.58672437
  0.57500000  -0.58672438
  0.57500000  -0.58672440
  0.57500000  -0.58672441
  0.57500000  -0.58672443
  0.57500000  -0.58672444
  0.57500000  -0.58672446
  0.57500000  -0.58672447
  0.57500000  -0.58672448
  0.57500000  -0.58672450
  0.57500000  -0.58672451
  0.57500000  -0.58672453
  0.57500000  -0.58672454
  0.57500000  -0.58672456
  0.57500000  -0.58672457
  0.57500000  -0.58672458
  0.57500000  -0.58672460
  0.57500000  -0.58672461
  0.57500000  -0.58672463
  0.57500000  -0.58672464
  0.57500000  -0.58672465
  0.57500000  -0.58672467
  0.57500000  -0.58672468
  0.57500000  -0.58672470
  0.57500000  -0.58672471
  0.57500000  -0.58672472
  0.57500000  -0.58672474
  0.57500000  -0.58672475
  0.57500000  -0.58672476
  0.57500000  -0.58672478
  0.57500000  -0.58672479
  0.57600000  -0.58709031
  0.57600000  -0.58709032
  0.57600000  -0.58709034
  0.57600000  -0.58709035
  0.57600000  -0.58709037
  0.57600000  -0.58709038
  0.57600000  -0.58709039
  0.57600000  -0.58709041
  0.57600000  -0.58709042
  0.57600000  -0.58709044
  0.57600000  -0.58709045
  0.57600000  -0.58709047
  0.57600000  -0.58709048
  0.57600000  -0.58709050
  0.57600000  -0.58709051
  0.57600000  -0.58709053
  0.57600000  -0.58709054
  0.57600000  -0.58709055
  0.57600000  -0.58709057
  0.57600000  -0.58709058
  0.57600000  -0.58709060
  0.57600000  -0.58709061
  0.57600000  -0.58709063
  0.57600000  -0.58709064
  0.57600000  -0.58709065
  0.57600000  -0.58709067
  0.57600000  -0.58709068
  0.57600000  -0.58709070
  0.57600000  -0.58709071
  0.57600000  -0.58709072
  0.57600000  -0.58709074
  0.57600000  -0.58709075
  0.57600000  -0.58709077
  0.57600000  -0.58709078
  0.57600000  -0.58709079
  0.57600000  -0.58709081
  0.57600000  -0.58709082
  0.57600000  -0.58709083
  0.57600000  -0.58709085
  0.57600000  -0.58709086
  0.57700000  -0.58745567
  0.57700000  -0.58745568
  0.57700000  -0.58745570
  0.57700000  -0.58745571
  0.57700000  -0.58745573
  0.57700000  -0.58745574
  0.57700000  -0.58745576
  0.57700000  -0.58745577
  0.57700000  -0.58745579
  0.57700000  -0.58745580
  0.57700000  -0.58745582
  0.57700000  -0.58745583
  0.57700000  -0.58745584
  0.57700000  -0.58745586
  0.57700000  -0.58745587
  0.57700000  -0.58745589
  0.57700000  -0.58745590
  0.57700000  -0.58745592
  0.57700000  -0.58745593
  0.57700000  -0.58745595
  0.57700000  -0.58745596
  0.57700000  -0.58745597
  0.57700000  -0.58745599
  0.57700000  -0.58745600
  0.57700000  -0.58745602
  0.57700000  -0.58745603
  0.57700000  -0.58745604
  0.57700000  -0.58745606
  0.57700000  -0.58745607
  0.57700000  -0.58745609
  0.57700000  -0.58745610
  0.57700000  -0.58745611
  0.57700000  -0.58745613
  0.57700000  -0.58745614
  0.57700000  -0.58745616
  0.57700000  -0.58745617
  0.57700000  -0.58745618
  0.57700000  -0.58745620
  0.57700000  -0.58745621
  0.57700000  -0.58745622
  0.57800000  -0.58782033
  0.57800000  -0.58782034
  0.57800000  -0.58782036
  0.57800000  -0.58782037
  0.57800000  -0.58782039
  0.57800000  -0.58782040
  0.57800000  -0.58782041
  0.57800000  -0.58782043
  0.57800000  -0.58782044
  0.57800000  -0.58782046
  0.57800000  -0.58782047
  0.57800000  -0.58782049
  0.57800000  -0.58782050
  0.57800000  -0.58782052
  0.57800000  -0.58782053
  0.57800000  -0.58782055
  0.57800000  -0.58782056
  0.57800000  -0.58782057
  0.57800000  -0.58782059
  0.57800000  -0.58782060
  0.57800000  -0.58782062
  0.57800000  -0.58782063
  0.57800000  -0.58782065
  0.57800000  -0.58782066
  0.57800000  -0.58782067
  0.57800000  -0.58782069
  0.57800000  -0.58782070
  0.57800000  -0.58782072
  0.57800000  -0.58782073
  0.57800000  -0.58782074
  0.57800000  -0.58782076
  0.57800000  -0.58782077
  0.57800000  -0.58782079
  0.57800000  -0.58782080
  0.57800000  -0.58782081
  0.57800000  -0.58782083
  0.57800000  -0.58782084
  0.57800000  -0.58782085
  0.57800000  -0.58782087
  0.57800000  -0.58782088
  0.57900000  -0.58818428
  0.57900000  -0.58818430
  0.57900000  -0.58818431
  0.57900000  -0.58818433
  0.57900000  -0.58818434
  0.57900000  -0.58818436
  0.57900000  -0.58818437
  0.57900000  -0.58818438
  0.57900000  -0.58818440
  0.57900000  -0.58818441
  0.57900000  -0.58818443
  0.57900000  -0.58818444
  0.57900000  -0.58818446
  0.57900000  -0.58818447
  0.57900000  -0.58818449
  0.57900000  -0.58818450
  0.57900000  -0.58818451
  0.57900000  -0.58818453
  0.57900000  -0.58818454
  0.57900000  -0.58818456
  0.57900000  -0.58818457
  0.57900000  -0.58818459
  0.57900000  -0.58818460
  0.57900000  -0.58818461
  0.57900000  -0.58818463
  0.57900000  -0.58818464
  0.57900000  -0.58818466
  0.57900000  -0.58818467
  0.57900000  -0.58818468
  0.57900000  -0.58818470
  0.57900000  -0.58818471
  0.57900000  -0.58818473
  0.57900000  -0.58818474
  0.57900000  -0.58818475
  0.57900000  -0.58818477
  0.57900000  -0.58818478
  0.57900000  -0.58818480
  0.57900000  -0.58818481
  0.57900000  -0.58818482
  0.57900000  -0.58818484
  0.58000000  -0.58854754
  0.58000000  -0.58854755
  0.58000000  -0.58854757
  0.58000000  -0.58854758
  0.58000000  -0.58854760
  0.58000000  -0.58854761
  0.58000000  -0.58854762
  0.58000000  -0.58854764
  0.58000000  -0.58854765
  0.58000000  -0.58854767
  0.58000000  -0.58854768
  0.58000000  -0.58854770
  0.58000000  -0.58854771
  0.58000000  -0.58854773
  0.58000000  -0.58854774
  0.58000000  -0.58854776
  0.58000000  -0.58854777
  0.58000000  -0.58854778
  0.58000000  -0.58854780
  0.58000000  -0.58854781
  0.58000000  -0.58854783
  0.58000000  -0.58854784
  0.58000000  -0.58854786
  0.58000000  -0.58854787
  0.58000000  -0.58854788
  0.58000000  -0.58854790
  0.58000000  -0.58854791
  0.58000000  -0.58854793
  0.58000000  -0.58854794
  0.58000000  -0.58854795
  0.58000000  -0.58854797
  0.58000000  -0.58854798
  0.58000000  -0.58854800
  0.58000000  -0.58854801
  0.58000000  -0.58854802
  0.58000000  -0.58854804
  0.58000000  -0.58854805
  0.58000000  -0.58854806
  0.58000000  -0.58854808
  0.58000000  -0.58854809
  0.58100000  -0.58891009
  0.58100000  -0.58891011
  0.58100000  -0.58891012
  0.58100000  -0.58891014
  0.58100000  -0.58891015
  0.58100000  -0.58891017
  0.58100000  -0.58891018
  0.58100000  -0.58891020
  0.58100000  -0.58891021
  0.58100000  -0.58891022
  0.58100000  -0.58891024
  0.58100000  -0.58891025
  0.58100000  -0.58891027
  0.58100000  -0.58891028
  0.58100000  -0.58891030
  0.58100000  -0.58891031
  0.58100000  -0.58891033
  0.58100000  -0.58891034
  0.58100000  -0.58891035
  0.58100000  -0.58891037
  0.58100000  -0.58891038
  0.58100000  -0.58891040
  0.58100000  -0.58891041
  0.58100000  -0.58891043
  0.58100000  -0.58891044
  0.58100000  -0.58891045
  0.58100000  -0.58891047
  0.58100000  -0.58891048
  0.58100000  -0.58891050
  0.58100000  -0.58891051
  0.58100000  -0.58891052
  0.58100000  -0.58891054
  0.58100000  -0.58891055
  0.58100000  -0.58891057
  0.58100000  -0.58891058
  0.58100000  -0.58891059
  0.58100000  -0.58891061
  0.58100000  -0.58891062
  0.58100000  -0.58891063
  0.58100000  -0.58891065
  0.58200000  -0.58927195
  0.58200000  -0.58927197
  0.58200000  -0.58927198
  0.58200000  -0.58927200
  0.58200000  -0.58927201
  0.58200000  -0.58927203
  0.58200000  -0.58927204
  0.58200000  -0.58927206
  0.58200000  -0.58927207
  0.58200000  -0.58927209
  0.58200000  -0.58927210
  0.58200000  -0.58927211
  0.58200000  -0.58927213
  0.58200000  -0.58927214
  0.58200000  -0.58927216
  0.58200000  -0.58927217
  0.58200000  -0.58927219
  0.58200000  -0.58927220
  0.58200000  -0.58927222
  0.58200000  -0.58927223
  0.58200000  -0.58927224
  0.58200000  -0.58927226
  0.58200000  -0.58927227
  0.58200000  -0.58927229
  0.58200000  -0.58927230
  0.58200000  -0.58927231
  0.58200000  -0.58927233
  0.58200000  -0.58927234
  0.58200000  -0.58927236
  0.58200000  -0.58927237
  0.58200000  -0.58927238
  0.58200000  -0.58927240
  0.58200000  -0.58927241
  0.58200000  -0.58927243
  0.58200000  -0.58927244
  0.58200000  -0.58927245
  0.58200000  -0.58927247
  0.58200000  -0.58927248
  0.58200000  -0.58927250
  0.58200000  -0.58927251
  0.58300000  -0.58963312
  0.58300000  -0.58963314
  0.58300000  -0.58963315
  0.58300000  -0.58963316
  0.58300000  -0.58963318
  0.58300000  -0.58963319
  0.58300000  -0.58963321
  0.58300000  -0.58963322
  0.58300000  -0.58963324
  0.58300000  -0.58963325
  0.58300000  -0.58963327
  0.58300000  -0.58963328
  0.58300000  -0.58963330
  0.58300000  -0.58963331
  0.58300000  -0.58963332
  0.58300000  -0.58963334
  0.58300000  -0.58963335
  0.58300000  -0.58963337
  0.58300000  -0.58963338
  0.58300000  -0.58963340
  0.58300000  -0.58963341
  0.58300000  -0.58963343
  0.58300000  -0.58963344
  0.58300000  -0.58963345
  0.58300000  -0.58963347
  0.58300000  -0.58963348
  0.58300000  -0.58963350
  0.58300000  -0.58963351
  0.58300000  -0.58963352
  0.58300000  -0.58963354
  0.58300000  -0.58963355
  0.58300000  -0.58963357
  0.58300000  -0.58963358
  0.58300000  -0.58963359
  0.58300000  -0.58963361
  0.58300000  -0.58963362
  0.58300000  -0.58963363
  0.58300000  -0.58963365
  0.58300000  -0.58963366
  0.58300000  -0.58963368
  0.58400000  -0.58999360
  0.58400000  -0.58999361
  0.58400000  -0.58999363
  0.58400000  -0.58999364
  0.58400000  -0.58999365
  0.58400000  -0.58999367
  0.58400000  -0.58999368
  0.58400000  -0.58999370
  0.58400000  -0.58999371
  0.58400000  -0.58999373
  0.58400000  -0.58999374
  0.58400000  -0.58999376
  0.58400000  -0.58999377
  0.58400000  -0.58999379
  0.58400000  -0.58999380
  0.58400000  -0.58999381
  0.58400000  -0.58999383
  0.58400000  -0.58999384
  0.58400000  -0.58999386
  0.58400000  -0.58999387
  0.58400000  -0.58999389
  0.58400000  -0.58999390
  0.58400000  -0.58999391
  0.58400000  -0.58999393
[truncated: 1,681,057 more chars]
