# Supplementary material for: A Fractional-Order Discrete Noninvertible Map of Cubic Type: Dynamics, Control, and Synchronization
Source: Hindawi journal article supplement (doi:10.1155/2020/2935192), 2020-05-22
Supplement: f1 [file 2935192.f1.zip › 2935192.f1/discretesanweiIN1q98c.dat]

  0.20000000  -0.68744484
  0.20000000   0.68744788
  0.20000000  -0.68744484
  0.20000000   0.68744787
  0.20000000  -0.68744484
  0.20000000   0.68744787
  0.20000000  -0.68744485
  0.20000000   0.68744787
  0.20000000  -0.68744485
  0.20000000   0.68744786
  0.20000000  -0.68744485
  0.20000000   0.68744786
  0.20000000  -0.68744485
  0.20000000   0.68744786
  0.20000000  -0.68744486
  0.20000000   0.68744785
  0.20000000  -0.68744486
  0.20000000   0.68744785
  0.20000000  -0.68744486
  0.20000000   0.68744785
  0.20000000  -0.68744487
  0.20000000   0.68744785
  0.20000000  -0.68744487
  0.20000000   0.68744784
  0.20000000  -0.68744487
  0.20000000   0.68744784
  0.20000000  -0.68744488
  0.20000000   0.68744784
  0.20000000  -0.68744488
  0.20000000   0.68744783
  0.20000000  -0.68744488
  0.20000000   0.68744783
  0.20000000  -0.68744488
  0.20000000   0.68744783
  0.20000000  -0.68744489
  0.20000000   0.68744782
  0.20000000  -0.68744489
  0.20000000   0.68744782
  0.20000000  -0.68744489
  0.20000000   0.68744782
  0.20080000  -0.68729377
  0.20080000   0.68729680
  0.20080000  -0.68729377
  0.20080000   0.68729680
  0.20080000  -0.68729378
  0.20080000   0.68729680
  0.20080000  -0.68729378
  0.20080000   0.68729679
  0.20080000  -0.68729378
  0.20080000   0.68729679
  0.20080000  -0.68729379
  0.20080000   0.68729679
  0.20080000  -0.68729379
  0.20080000   0.68729678
  0.20080000  -0.68729379
  0.20080000   0.68729678
  0.20080000  -0.68729379
  0.20080000   0.68729678
  0.20080000  -0.68729380
  0.20080000   0.68729678
  0.20080000  -0.68729380
  0.20080000   0.68729677
  0.20080000  -0.68729380
  0.20080000   0.68729677
  0.20080000  -0.68729381
  0.20080000   0.68729677
  0.20080000  -0.68729381
  0.20080000   0.68729676
  0.20080000  -0.68729381
  0.20080000   0.68729676
  0.20080000  -0.68729382
  0.20080000   0.68729676
  0.20080000  -0.68729382
  0.20080000   0.68729675
  0.20080000  -0.68729382
  0.20080000   0.68729675
  0.20080000  -0.68729382
  0.20080000   0.68729675
  0.20080000  -0.68729383
  0.20080000   0.68729675
  0.20160000  -0.68714254
  0.20160000   0.68714556
  0.20160000  -0.68714254
  0.20160000   0.68714556
  0.20160000  -0.68714254
  0.20160000   0.68714556
  0.20160000  -0.68714255
  0.20160000   0.68714555
  0.20160000  -0.68714255
  0.20160000   0.68714555
  0.20160000  -0.68714255
  0.20160000   0.68714555
  0.20160000  -0.68714256
  0.20160000   0.68714554
  0.20160000  -0.68714256
  0.20160000   0.68714554
  0.20160000  -0.68714256
  0.20160000   0.68714554
  0.20160000  -0.68714257
  0.20160000   0.68714554
  0.20160000  -0.68714257
  0.20160000   0.68714553
  0.20160000  -0.68714257
  0.20160000   0.68714553
  0.20160000  -0.68714257
  0.20160000   0.68714553
  0.20160000  -0.68714258
  0.20160000   0.68714552
  0.20160000  -0.68714258
  0.20160000   0.68714552
  0.20160000  -0.68714258
  0.20160000   0.68714552
  0.20160000  -0.68714259
  0.20160000   0.68714552
  0.20160000  -0.68714259
  0.20160000   0.68714551
  0.20160000  -0.68714259
  0.20160000   0.68714551
  0.20160000  -0.68714259
  0.20160000   0.68714551
  0.20240000  -0.68699114
  0.20240000   0.68699416
  0.20240000  -0.68699114
  0.20240000   0.68699415
  0.20240000  -0.68699115
  0.20240000   0.68699415
  0.20240000  -0.68699115
  0.20240000   0.68699415
  0.20240000  -0.68699115
  0.20240000   0.68699415
  0.20240000  -0.68699116
  0.20240000   0.68699414
  0.20240000  -0.68699116
  0.20240000   0.68699414
  0.20240000  -0.68699116
  0.20240000   0.68699414
  0.20240000  -0.68699116
  0.20240000   0.68699413
  0.20240000  -0.68699117
  0.20240000   0.68699413
  0.20240000  -0.68699117
  0.20240000   0.68699413
  0.20240000  -0.68699117
  0.20240000   0.68699412
  0.20240000  -0.68699118
  0.20240000   0.68699412
  0.20240000  -0.68699118
  0.20240000   0.68699412
  0.20240000  -0.68699118
  0.20240000   0.68699412
  0.20240000  -0.68699119
  0.20240000   0.68699411
  0.20240000  -0.68699119
  0.20240000   0.68699411
  0.20240000  -0.68699119
  0.20240000   0.68699411
  0.20240000  -0.68699119
  0.20240000   0.68699410
  0.20240000  -0.68699120
  0.20240000   0.68699410
  0.20320000  -0.68683958
  0.20320000   0.68684259
  0.20320000  -0.68683958
  0.20320000   0.68684258
  0.20320000  -0.68683958
  0.20320000   0.68684258
  0.20320000  -0.68683958
  0.20320000   0.68684258
  0.20320000  -0.68683959
  0.20320000   0.68684257
  0.20320000  -0.68683959
  0.20320000   0.68684257
  0.20320000  -0.68683959
  0.20320000   0.68684257
  0.20320000  -0.68683960
  0.20320000   0.68684256
  0.20320000  -0.68683960
  0.20320000   0.68684256
  0.20320000  -0.68683960
  0.20320000   0.68684256
  0.20320000  -0.68683961
  0.20320000   0.68684256
  0.20320000  -0.68683961
  0.20320000   0.68684255
  0.20320000  -0.68683961
  0.20320000   0.68684255
  0.20320000  -0.68683961
  0.20320000   0.68684255
  0.20320000  -0.68683962
  0.20320000   0.68684254
  0.20320000  -0.68683962
  0.20320000   0.68684254
  0.20320000  -0.68683962
  0.20320000   0.68684254
  0.20320000  -0.68683963
  0.20320000   0.68684254
  0.20320000  -0.68683963
  0.20320000   0.68684253
  0.20320000  -0.68683963
  0.20320000   0.68684253
  0.20400000  -0.68668784
  0.20400000   0.68669085
  0.20400000  -0.68668785
  0.20400000   0.68669084
  0.20400000  -0.68668785
  0.20400000   0.68669084
  0.20400000  -0.68668785
  0.20400000   0.68669084
  0.20400000  -0.68668786
  0.20400000   0.68669084
  0.20400000  -0.68668786
  0.20400000   0.68669083
  0.20400000  -0.68668786
  0.20400000   0.68669083
  0.20400000  -0.68668787
  0.20400000   0.68669083
  0.20400000  -0.68668787
  0.20400000   0.68669082
  0.20400000  -0.68668787
  0.20400000   0.68669082
  0.20400000  -0.68668787
  0.20400000   0.68669082
  0.20400000  -0.68668788
  0.20400000   0.68669081
  0.20400000  -0.68668788
  0.20400000   0.68669081
  0.20400000  -0.68668788
  0.20400000   0.68669081
  0.20400000  -0.68668789
  0.20400000   0.68669081
  0.20400000  -0.68668789
  0.20400000   0.68669080
  0.20400000  -0.68668789
  0.20400000   0.68669080
  0.20400000  -0.68668789
  0.20400000   0.68669080
  0.20400000  -0.68668790
  0.20400000   0.68669079
  0.20400000  -0.68668790
  0.20400000   0.68669079
  0.20480000  -0.68653595
  0.20480000   0.68653894
  0.20480000  -0.68653595
  0.20480000   0.68653894
  0.20480000  -0.68653595
  0.20480000   0.68653894
  0.20480000  -0.68653595
  0.20480000   0.68653893
  0.20480000  -0.68653596
  0.20480000   0.68653893
  0.20480000  -0.68653596
  0.20480000   0.68653893
  0.20480000  -0.68653596
  0.20480000   0.68653892
  0.20480000  -0.68653597
  0.20480000   0.68653892
  0.20480000  -0.68653597
  0.20480000   0.68653892
  0.20480000  -0.68653597
  0.20480000   0.68653891
  0.20480000  -0.68653598
  0.20480000   0.68653891
  0.20480000  -0.68653598
  0.20480000   0.68653891
  0.20480000  -0.68653598
  0.20480000   0.68653891
  0.20480000  -0.68653598
  0.20480000   0.68653890
  0.20480000  -0.68653599
  0.20480000   0.68653890
  0.20480000  -0.68653599
  0.20480000   0.68653890
  0.20480000  -0.68653599
  0.20480000   0.68653889
  0.20480000  -0.68653600
  0.20480000   0.68653889
  0.20480000  -0.68653600
  0.20480000   0.68653889
  0.20480000  -0.68653600
  0.20480000   0.68653889
  0.20560000  -0.68638388
  0.20560000   0.68638687
  0.20560000  -0.68638388
  0.20560000   0.68638687
  0.20560000  -0.68638389
  0.20560000   0.68638686
  0.20560000  -0.68638389
  0.20560000   0.68638686
  0.20560000  -0.68638389
  0.20560000   0.68638686
  0.20560000  -0.68638389
  0.20560000   0.68638685
  0.20560000  -0.68638390
  0.20560000   0.68638685
  0.20560000  -0.68638390
  0.20560000   0.68638685
  0.20560000  -0.68638390
  0.20560000   0.68638684
  0.20560000  -0.68638391
  0.20560000   0.68638684
  0.20560000  -0.68638391
  0.20560000   0.68638684
  0.20560000  -0.68638391
  0.20560000   0.68638684
  0.20560000  -0.68638392
  0.20560000   0.68638683
  0.20560000  -0.68638392
  0.20560000   0.68638683
  0.20560000  -0.68638392
  0.20560000   0.68638683
  0.20560000  -0.68638392
  0.20560000   0.68638682
  0.20560000  -0.68638393
  0.20560000   0.68638682
  0.20560000  -0.68638393
  0.20560000   0.68638682
  0.20560000  -0.68638393
  0.20560000   0.68638682
  0.20560000  -0.68638394
  0.20560000   0.68638681
  0.20640000  -0.68623165
  0.20640000   0.68623463
  0.20640000  -0.68623165
  0.20640000   0.68623462
  0.20640000  -0.68623165
  0.20640000   0.68623462
  0.20640000  -0.68623166
  0.20640000   0.68623462
  0.20640000  -0.68623166
  0.20640000   0.68623462
  0.20640000  -0.68623166
  0.20640000   0.68623461
  0.20640000  -0.68623166
  0.20640000   0.68623461
  0.20640000  -0.68623167
  0.20640000   0.68623461
  0.20640000  -0.68623167
  0.20640000   0.68623460
  0.20640000  -0.68623167
  0.20640000   0.68623460
  0.20640000  -0.68623168
  0.20640000   0.68623460
  0.20640000  -0.68623168
  0.20640000   0.68623459
  0.20640000  -0.68623168
  0.20640000   0.68623459
  0.20640000  -0.68623168
  0.20640000   0.68623459
  0.20640000  -0.68623169
  0.20640000   0.68623459
  0.20640000  -0.68623169
  0.20640000   0.68623458
  0.20640000  -0.68623169
  0.20640000   0.68623458
  0.20640000  -0.68623170
  0.20640000   0.68623458
  0.20640000  -0.68623170
  0.20640000   0.68623457
  0.20640000  -0.68623170
  0.20640000   0.68623457
  0.20720000  -0.68607924
  0.20720000   0.68608222
  0.20720000  -0.68607925
  0.20720000   0.68608222
  0.20720000  -0.68607925
  0.20720000   0.68608221
  0.20720000  -0.68607925
  0.20720000   0.68608221
  0.20720000  -0.68607926
  0.20720000   0.68608221
  0.20720000  -0.68607926
  0.20720000   0.68608220
  0.20720000  -0.68607926
  0.20720000   0.68608220
  0.20720000  -0.68607927
  0.20720000   0.68608220
  0.20720000  -0.68607927
  0.20720000   0.68608219
  0.20720000  -0.68607927
  0.20720000   0.68608219
  0.20720000  -0.68607927
  0.20720000   0.68608219
  0.20720000  -0.68607928
  0.20720000   0.68608219
  0.20720000  -0.68607928
  0.20720000   0.68608218
  0.20720000  -0.68607928
  0.20720000   0.68608218
  0.20720000  -0.68607929
  0.20720000   0.68608218
  0.20720000  -0.68607929
  0.20720000   0.68608217
  0.20720000  -0.68607929
  0.20720000   0.68608217
  0.20720000  -0.68607929
  0.20720000   0.68608217
  0.20720000  -0.68607930
  0.20720000   0.68608217
  0.20720000  -0.68607930
  0.20720000   0.68608216
  0.20800000  -0.68592667
  0.20800000   0.68592964
  0.20800000  -0.68592668
  0.20800000   0.68592964
  0.20800000  -0.68592668
  0.20800000   0.68592964
  0.20800000  -0.68592668
  0.20800000   0.68592963
  0.20800000  -0.68592669
  0.20800000   0.68592963
  0.20800000  -0.68592669
  0.20800000   0.68592963
  0.20800000  -0.68592669
  0.20800000   0.68592962
  0.20800000  -0.68592670
  0.20800000   0.68592962
  0.20800000  -0.68592670
  0.20800000   0.68592962
  0.20800000  -0.68592670
  0.20800000   0.68592961
  0.20800000  -0.68592670
  0.20800000   0.68592961
  0.20800000  -0.68592671
  0.20800000   0.68592961
  0.20800000  -0.68592671
  0.20800000   0.68592961
  0.20800000  -0.68592671
  0.20800000   0.68592960
  0.20800000  -0.68592672
  0.20800000   0.68592960
  0.20800000  -0.68592672
  0.20800000   0.68592960
  0.20800000  -0.68592672
  0.20800000   0.68592959
  0.20800000  -0.68592672
  0.20800000   0.68592959
  0.20800000  -0.68592673
  0.20800000   0.68592959
  0.20800000  -0.68592673
  0.20800000   0.68592959
  0.20880000  -0.68577394
  0.20880000   0.68577690
  0.20880000  -0.68577394
  0.20880000   0.68577689
  0.20880000  -0.68577394
  0.20880000   0.68577689
  0.20880000  -0.68577395
  0.20880000   0.68577689
  0.20880000  -0.68577395
  0.20880000   0.68577688
  0.20880000  -0.68577395
  0.20880000   0.68577688
  0.20880000  -0.68577395
  0.20880000   0.68577688
  0.20880000  -0.68577396
  0.20880000   0.68577688
  0.20880000  -0.68577396
  0.20880000   0.68577687
  0.20880000  -0.68577396
  0.20880000   0.68577687
  0.20880000  -0.68577397
  0.20880000   0.68577687
  0.20880000  -0.68577397
  0.20880000   0.68577686
  0.20880000  -0.68577397
  0.20880000   0.68577686
  0.20880000  -0.68577397
  0.20880000   0.68577686
  0.20880000  -0.68577398
  0.20880000   0.68577685
  0.20880000  -0.68577398
  0.20880000   0.68577685
  0.20880000  -0.68577398
  0.20880000   0.68577685
  0.20880000  -0.68577399
  0.20880000   0.68577685
  0.20880000  -0.68577399
  0.20880000   0.68577684
  0.20880000  -0.68577399
  0.20880000   0.68577684
  0.20960000  -0.68562103
  0.20960000   0.68562398
  0.20960000  -0.68562103
  0.20960000   0.68562398
  0.20960000  -0.68562104
  0.20960000   0.68562398
  0.20960000  -0.68562104
  0.20960000   0.68562397
  0.20960000  -0.68562104
  0.20960000   0.68562397
  0.20960000  -0.68562104
  0.20960000   0.68562397
  0.20960000  -0.68562105
  0.20960000   0.68562396
  0.20960000  -0.68562105
  0.20960000   0.68562396
  0.20960000  -0.68562105
  0.20960000   0.68562396
  0.20960000  -0.68562106
  0.20960000   0.68562395
  0.20960000  -0.68562106
  0.20960000   0.68562395
  0.20960000  -0.68562106
  0.20960000   0.68562395
  0.20960000  -0.68562106
  0.20960000   0.68562395
  0.20960000  -0.68562107
  0.20960000   0.68562394
  0.20960000  -0.68562107
  0.20960000   0.68562394
  0.20960000  -0.68562107
  0.20960000   0.68562394
  0.20960000  -0.68562108
  0.20960000   0.68562393
  0.20960000  -0.68562108
  0.20960000   0.68562393
  0.20960000  -0.68562108
  0.20960000   0.68562393
  0.20960000  -0.68562108
  0.20960000   0.68562393
  0.21040000  -0.68546795
  0.21040000   0.68547090
  0.21040000  -0.68546796
  0.21040000   0.68547090
  0.21040000  -0.68546796
  0.21040000   0.68547089
  0.21040000  -0.68546796
  0.21040000   0.68547089
  0.21040000  -0.68546797
  0.21040000   0.68547089
  0.21040000  -0.68546797
  0.21040000   0.68547088
  0.21040000  -0.68546797
  0.21040000   0.68547088
  0.21040000  -0.68546797
  0.21040000   0.68547088
  0.21040000  -0.68546798
  0.21040000   0.68547087
  0.21040000  -0.68546798
  0.21040000   0.68547087
  0.21040000  -0.68546798
  0.21040000   0.68547087
  0.21040000  -0.68546799
  0.21040000   0.68547087
  0.21040000  -0.68546799
  0.21040000   0.68547086
  0.21040000  -0.68546799
  0.21040000   0.68547086
  0.21040000  -0.68546799
  0.21040000   0.68547086
  0.21040000  -0.68546800
  0.21040000   0.68547085
  0.21040000  -0.68546800
  0.21040000   0.68547085
  0.21040000  -0.68546800
  0.21040000   0.68547085
  0.21040000  -0.68546801
  0.21040000   0.68547085
  0.21040000  -0.68546801
  0.21040000   0.68547084
  0.21120000  -0.68531471
  0.21120000   0.68531765
  0.21120000  -0.68531471
  0.21120000   0.68531764
  0.21120000  -0.68531471
  0.21120000   0.68531764
  0.21120000  -0.68531472
  0.21120000   0.68531764
  0.21120000  -0.68531472
  0.21120000   0.68531763
  0.21120000  -0.68531472
  0.21120000   0.68531763
  0.21120000  -0.68531473
  0.21120000   0.68531763
  0.21120000  -0.68531473
  0.21120000   0.68531762
  0.21120000  -0.68531473
  0.21120000   0.68531762
  0.21120000  -0.68531473
  0.21120000   0.68531762
  0.21120000  -0.68531474
  0.21120000   0.68531762
  0.21120000  -0.68531474
  0.21120000   0.68531761
  0.21120000  -0.68531474
  0.21120000   0.68531761
  0.21120000  -0.68531475
  0.21120000   0.68531761
  0.21120000  -0.68531475
  0.21120000   0.68531760
  0.21120000  -0.68531475
  0.21120000   0.68531760
  0.21120000  -0.68531475
  0.21120000   0.68531760
  0.21120000  -0.68531476
  0.21120000   0.68531760
  0.21120000  -0.68531476
  0.21120000   0.68531759
  0.21120000  -0.68531476
  0.21120000   0.68531759
  0.21200000  -0.68516129
  0.21200000   0.68516422
  0.21200000  -0.68516130
  0.21200000   0.68516422
  0.21200000  -0.68516130
  0.21200000   0.68516422
  0.21200000  -0.68516130
  0.21200000   0.68516421
  0.21200000  -0.68516130
  0.21200000   0.68516421
  0.21200000  -0.68516131
  0.21200000   0.68516421
  0.21200000  -0.68516131
  0.21200000   0.68516420
  0.21200000  -0.68516131
  0.21200000   0.68516420
  0.21200000  -0.68516132
  0.21200000   0.68516420
  0.21200000  -0.68516132
  0.21200000   0.68516420
  0.21200000  -0.68516132
  0.21200000   0.68516419
  0.21200000  -0.68516132
  0.21200000   0.68516419
  0.21200000  -0.68516133
  0.21200000   0.68516419
  0.21200000  -0.68516133
  0.21200000   0.68516418
  0.21200000  -0.68516133
  0.21200000   0.68516418
  0.21200000  -0.68516134
  0.21200000   0.68516418
  0.21200000  -0.68516134
  0.21200000   0.68516418
  0.21200000  -0.68516134
  0.21200000   0.68516417
  0.21200000  -0.68516134
  0.21200000   0.68516417
  0.21200000  -0.68516135
  0.21200000   0.68516417
  0.21280000  -0.68500771
  0.21280000   0.68501063
  0.21280000  -0.68500771
  0.21280000   0.68501063
  0.21280000  -0.68500771
  0.21280000   0.68501062
  0.21280000  -0.68500772
  0.21280000   0.68501062
  0.21280000  -0.68500772
  0.21280000   0.68501062
  0.21280000  -0.68500772
  0.21280000   0.68501062
  0.21280000  -0.68500772
  0.21280000   0.68501061
  0.21280000  -0.68500773
  0.21280000   0.68501061
  0.21280000  -0.68500773
  0.21280000   0.68501061
  0.21280000  -0.68500773
  0.21280000   0.68501060
  0.21280000  -0.68500774
  0.21280000   0.68501060
  0.21280000  -0.68500774
  0.21280000   0.68501060
  0.21280000  -0.68500774
  0.21280000   0.68501059
  0.21280000  -0.68500774
  0.21280000   0.68501059
  0.21280000  -0.68500775
  0.21280000   0.68501059
  0.21280000  -0.68500775
  0.21280000   0.68501059
  0.21280000  -0.68500775
  0.21280000   0.68501058
  0.21280000  -0.68500776
  0.21280000   0.68501058
  0.21280000  -0.68500776
  0.21280000   0.68501058
  0.21280000  -0.68500776
  0.21280000   0.68501058
  0.21360000  -0.68485395
  0.21360000   0.68485687
  0.21360000  -0.68485395
  0.21360000   0.68485686
  0.21360000  -0.68485396
  0.21360000   0.68485686
  0.21360000  -0.68485396
  0.21360000   0.68485686
  0.21360000  -0.68485396
  0.21360000   0.68485686
  0.21360000  -0.68485397
  0.21360000   0.68485685
  0.21360000  -0.68485397
  0.21360000   0.68485685
  0.21360000  -0.68485397
  0.21360000   0.68485685
  0.21360000  -0.68485397
  0.21360000   0.68485684
  0.21360000  -0.68485398
  0.21360000   0.68485684
  0.21360000  -0.68485398
  0.21360000   0.68485684
  0.21360000  -0.68485398
  0.21360000   0.68485683
  0.21360000  -0.68485399
  0.21360000   0.68485683
  0.21360000  -0.68485399
  0.21360000   0.68485683
  0.21360000  -0.68485399
  0.21360000   0.68485683
  0.21360000  -0.68485399
  0.21360000   0.68485682
  0.21360000  -0.68485400
  0.21360000   0.68485682
  0.21360000  -0.68485400
  0.21360000   0.68485682
  0.21360000  -0.68485400
  0.21360000   0.68485682
  0.21360000  -0.68485401
  0.21360000   0.68485681
  0.21440000  -0.68470002
  0.21440000   0.68470293
  0.21440000  -0.68470003
  0.21440000   0.68470293
  0.21440000  -0.68470003
  0.21440000   0.68470293
  0.21440000  -0.68470003
  0.21440000   0.68470292
  0.21440000  -0.68470004
  0.21440000   0.68470292
  0.21440000  -0.68470004
  0.21440000   0.68470292
  0.21440000  -0.68470004
  0.21440000   0.68470292
  0.21440000  -0.68470005
  0.21440000   0.68470291
  0.21440000  -0.68470005
  0.21440000   0.68470291
  0.21440000  -0.68470005
  0.21440000   0.68470291
  0.21440000  -0.68470005
  0.21440000   0.68470290
  0.21440000  -0.68470006
  0.21440000   0.68470290
  0.21440000  -0.68470006
  0.21440000   0.68470290
  0.21440000  -0.68470006
  0.21440000   0.68470290
  0.21440000  -0.68470007
  0.21440000   0.68470289
  0.21440000  -0.68470007
  0.21440000   0.68470289
  0.21440000  -0.68470007
  0.21440000   0.68470289
  0.21440000  -0.68470007
  0.21440000   0.68470288
  0.21440000  -0.68470008
  0.21440000   0.68470288
  0.21440000  -0.68470008
  0.21440000   0.68470288
  0.21520000  -0.68454593
  0.21520000   0.68454883
  0.21520000  -0.68454593
  0.21520000   0.68454883
  0.21520000  -0.68454593
  0.21520000   0.68454882
  0.21520000  -0.68454594
  0.21520000   0.68454882
  0.21520000  -0.68454594
  0.21520000   0.68454882
  0.21520000  -0.68454594
  0.21520000   0.68454881
  0.21520000  -0.68454595
  0.21520000   0.68454881
  0.21520000  -0.68454595
  0.21520000   0.68454881
  0.21520000  -0.68454595
  0.21520000   0.68454881
  0.21520000  -0.68454595
  0.21520000   0.68454880
  0.21520000  -0.68454596
  0.21520000   0.68454880
  0.21520000  -0.68454596
  0.21520000   0.68454880
  0.21520000  -0.68454596
  0.21520000   0.68454879
  0.21520000  -0.68454597
  0.21520000   0.68454879
  0.21520000  -0.68454597
  0.21520000   0.68454879
  0.21520000  -0.68454597
  0.21520000   0.68454879
  0.21520000  -0.68454597
  0.21520000   0.68454878
  0.21520000  -0.68454598
  0.21520000   0.68454878
  0.21520000  -0.68454598
  0.21520000   0.68454878
  0.21520000  -0.68454598
  0.21520000   0.68454878
  0.21600000  -0.68439166
  0.21600000   0.68439455
  0.21600000  -0.68439166
  0.21600000   0.68439455
  0.21600000  -0.68439167
  0.21600000   0.68439455
  0.21600000  -0.68439167
  0.21600000   0.68439455
  0.21600000  -0.68439167
  0.21600000   0.68439454
  0.21600000  -0.68439167
  0.21600000   0.68439454
  0.21600000  -0.68439168
  0.21600000   0.68439454
  0.21600000  -0.68439168
  0.21600000   0.68439453
  0.21600000  -0.68439168
  0.21600000   0.68439453
  0.21600000  -0.68439169
  0.21600000   0.68439453
  0.21600000  -0.68439169
  0.21600000   0.68439452
  0.21600000  -0.68439169
  0.21600000   0.68439452
  0.21600000  -0.68439169
  0.21600000   0.68439452
  0.21600000  -0.68439170
  0.21600000   0.68439452
  0.21600000  -0.68439170
  0.21600000   0.68439451
  0.21600000  -0.68439170
  0.21600000   0.68439451
  0.21600000  -0.68439171
  0.21600000   0.68439451
  0.21600000  -0.68439171
  0.21600000   0.68439451
  0.21600000  -0.68439171
  0.21600000   0.68439450
  0.21600000  -0.68439171
  0.21600000   0.68439450
  0.21680000  -0.68423722
  0.21680000   0.68424011
  0.21680000  -0.68423722
  0.21680000   0.68424010
  0.21680000  -0.68423723
  0.21680000   0.68424010
  0.21680000  -0.68423723
  0.21680000   0.68424010
  0.21680000  -0.68423723
  0.21680000   0.68424010
  0.21680000  -0.68423723
  0.21680000   0.68424009
  0.21680000  -0.68423724
  0.21680000   0.68424009
  0.21680000  -0.68423724
  0.21680000   0.68424009
  0.21680000  -0.68423724
  0.21680000   0.68424008
  0.21680000  -0.68423725
  0.21680000   0.68424008
  0.21680000  -0.68423725
  0.21680000   0.68424008
  0.21680000  -0.68423725
  0.21680000   0.68424008
  0.21680000  -0.68423725
  0.21680000   0.68424007
  0.21680000  -0.68423726
  0.21680000   0.68424007
  0.21680000  -0.68423726
  0.21680000   0.68424007
  0.21680000  -0.68423726
  0.21680000   0.68424006
  0.21680000  -0.68423727
  0.21680000   0.68424006
  0.21680000  -0.68423727
  0.21680000   0.68424006
  0.21680000  -0.68423727
  0.21680000   0.68424006
  0.21680000  -0.68423727
  0.21680000   0.68424005
  0.21760000  -0.68408261
  0.21760000   0.68408549
  0.21760000  -0.68408261
  0.21760000   0.68408549
  0.21760000  -0.68408261
  0.21760000   0.68408548
  0.21760000  -0.68408262
  0.21760000   0.68408548
  0.21760000  -0.68408262
  0.21760000   0.68408548
  0.21760000  -0.68408262
  0.21760000   0.68408547
  0.21760000  -0.68408263
  0.21760000   0.68408547
  0.21760000  -0.68408263
  0.21760000   0.68408547
  0.21760000  -0.68408263
  0.21760000   0.68408546
  0.21760000  -0.68408263
  0.21760000   0.68408546
  0.21760000  -0.68408264
  0.21760000   0.68408546
  0.21760000  -0.68408264
  0.21760000   0.68408546
  0.21760000  -0.68408264
  0.21760000   0.68408545
  0.21760000  -0.68408265
  0.21760000   0.68408545
  0.21760000  -0.68408265
  0.21760000   0.68408545
  0.21760000  -0.68408265
  0.21760000   0.68408545
  0.21760000  -0.68408265
  0.21760000   0.68408544
  0.21760000  -0.68408266
  0.21760000   0.68408544
  0.21760000  -0.68408266
  0.21760000   0.68408544
  0.21760000  -0.68408266
  0.21760000   0.68408543
  0.21840000  -0.68392782
  0.21840000   0.68393070
  0.21840000  -0.68392783
  0.21840000   0.68393069
  0.21840000  -0.68392783
  0.21840000   0.68393069
  0.21840000  -0.68392783
  0.21840000   0.68393069
  0.21840000  -0.68392784
  0.21840000   0.68393069
  0.21840000  -0.68392784
  0.21840000   0.68393068
  0.21840000  -0.68392784
  0.21840000   0.68393068
  0.21840000  -0.68392784
  0.21840000   0.68393068
  0.21840000  -0.68392785
  0.21840000   0.68393067
  0.21840000  -0.68392785
  0.21840000   0.68393067
  0.21840000  -0.68392785
  0.21840000   0.68393067
  0.21840000  -0.68392786
  0.21840000   0.68393067
  0.21840000  -0.68392786
  0.21840000   0.68393066
  0.21840000  -0.68392786
  0.21840000   0.68393066
  0.21840000  -0.68392786
  0.21840000   0.68393066
  0.21840000  -0.68392787
  0.21840000   0.68393065
  0.21840000  -0.68392787
  0.21840000   0.68393065
  0.21840000  -0.68392787
  0.21840000   0.68393065
  0.21840000  -0.68392788
  0.21840000   0.68393065
  0.21840000  -0.68392788
  0.21840000   0.68393064
  0.21920000  -0.68377287
  0.21920000   0.68377573
  0.21920000  -0.68377287
  0.21920000   0.68377573
  0.21920000  -0.68377287
  0.21920000   0.68377573
  0.21920000  -0.68377288
  0.21920000   0.68377573
  0.21920000  -0.68377288
  0.21920000   0.68377572
  0.21920000  -0.68377288
  0.21920000   0.68377572
  0.21920000  -0.68377289
  0.21920000   0.68377572
  0.21920000  -0.68377289
  0.21920000   0.68377571
  0.21920000  -0.68377289
  0.21920000   0.68377571
  0.21920000  -0.68377289
  0.21920000   0.68377571
  0.21920000  -0.68377290
  0.21920000   0.68377571
  0.21920000  -0.68377290
  0.21920000   0.68377570
  0.21920000  -0.68377290
  0.21920000   0.68377570
  0.21920000  -0.68377291
  0.21920000   0.68377570
  0.21920000  -0.68377291
  0.21920000   0.68377569
  0.21920000  -0.68377291
  0.21920000   0.68377569
  0.21920000  -0.68377291
  0.21920000   0.68377569
  0.21920000  -0.68377292
  0.21920000   0.68377569
  0.21920000  -0.68377292
  0.21920000   0.68377568
  0.21920000  -0.68377292
  0.21920000   0.68377568
  0.22000000  -0.68361774
  0.22000000   0.68362060
  0.22000000  -0.68361774
  0.22000000   0.68362060
  0.22000000  -0.68361775
  0.22000000   0.68362059
  0.22000000  -0.68361775
  0.22000000   0.68362059
  0.22000000  -0.68361775
  0.22000000   0.68362059
  0.22000000  -0.68361775
  0.22000000   0.68362058
  0.22000000  -0.68361776
  0.22000000   0.68362058
  0.22000000  -0.68361776
  0.22000000   0.68362058
  0.22000000  -0.68361776
  0.22000000   0.68362058
  0.22000000  -0.68361777
  0.22000000   0.68362057
  0.22000000  -0.68361777
  0.22000000   0.68362057
  0.22000000  -0.68361777
  0.22000000   0.68362057
  0.22000000  -0.68361777
  0.22000000   0.68362056
  0.22000000  -0.68361778
  0.22000000   0.68362056
  0.22000000  -0.68361778
  0.22000000   0.68362056
  0.22000000  -0.68361778
  0.22000000   0.68362056
  0.22000000  -0.68361779
  0.22000000   0.68362055
  0.22000000  -0.68361779
  0.22000000   0.68362055
  0.22000000  -0.68361779
  0.22000000   0.68362055
  0.22000000  -0.68361779
  0.22000000   0.68362054
  0.22080000  -0.68346244
  0.22080000   0.68346529
  0.22080000  -0.68346244
  0.22080000   0.68346529
  0.22080000  -0.68346244
  0.22080000   0.68346528
  0.22080000  -0.68346245
  0.22080000   0.68346528
  0.22080000  -0.68346245
  0.22080000   0.68346528
  0.22080000  -0.68346245
  0.22080000   0.68346528
  0.22080000  -0.68346246
  0.22080000   0.68346527
  0.22080000  -0.68346246
  0.22080000   0.68346527
  0.22080000  -0.68346246
  0.22080000   0.68346527
  0.22080000  -0.68346246
  0.22080000   0.68346526
  0.22080000  -0.68346247
  0.22080000   0.68346526
  0.22080000  -0.68346247
  0.22080000   0.68346526
  0.22080000  -0.68346247
  0.22080000   0.68346526
  0.22080000  -0.68346248
  0.22080000   0.68346525
  0.22080000  -0.68346248
  0.22080000   0.68346525
  0.22080000  -0.68346248
  0.22080000   0.68346525
  0.22080000  -0.68346248
  0.22080000   0.68346524
  0.22080000  -0.68346249
  0.22080000   0.68346524
  0.22080000  -0.68346249
  0.22080000   0.68346524
  0.22080000  -0.68346249
  0.22080000   0.68346524
  0.22160000  -0.68330696
  0.22160000   0.68330981
  0.22160000  -0.68330697
  0.22160000   0.68330980
  0.22160000  -0.68330697
  0.22160000   0.68330980
  0.22160000  -0.68330697
  0.22160000   0.68330980
  0.22160000  -0.68330698
  0.22160000   0.68330980
  0.22160000  -0.68330698
  0.22160000   0.68330979
  0.22160000  -0.68330698
  0.22160000   0.68330979
  0.22160000  -0.68330698
  0.22160000   0.68330979
  0.22160000  -0.68330699
  0.22160000   0.68330978
  0.22160000  -0.68330699
  0.22160000   0.68330978
  0.22160000  -0.68330699
  0.22160000   0.68330978
  0.22160000  -0.68330699
  0.22160000   0.68330978
  0.22160000  -0.68330700
  0.22160000   0.68330977
  0.22160000  -0.68330700
  0.22160000   0.68330977
  0.22160000  -0.68330700
  0.22160000   0.68330977
  0.22160000  -0.68330701
  0.22160000   0.68330977
  0.22160000  -0.68330701
  0.22160000   0.68330976
  0.22160000  -0.68330701
  0.22160000   0.68330976
  0.22160000  -0.68330701
  0.22160000   0.68330976
  0.22160000  -0.68330702
  0.22160000   0.68330975
  0.22240000  -0.68315131
  0.22240000   0.68315415
  0.22240000  -0.68315132
  0.22240000   0.68315415
  0.22240000  -0.68315132
  0.22240000   0.68315415
  0.22240000  -0.68315132
  0.22240000   0.68315414
  0.22240000  -0.68315133
  0.22240000   0.68315414
  0.22240000  -0.68315133
  0.22240000   0.68315414
  0.22240000  -0.68315133
  0.22240000   0.68315413
  0.22240000  -0.68315134
  0.22240000   0.68315413
  0.22240000  -0.68315134
  0.22240000   0.68315413
  0.22240000  -0.68315134
  0.22240000   0.68315413
  0.22240000  -0.68315134
  0.22240000   0.68315412
  0.22240000  -0.68315135
  0.22240000   0.68315412
  0.22240000  -0.68315135
  0.22240000   0.68315412
  0.22240000  -0.68315135
  0.22240000   0.68315412
  0.22240000  -0.68315135
  0.22240000   0.68315411
  0.22240000  -0.68315136
  0.22240000   0.68315411
  0.22240000  -0.68315136
  0.22240000   0.68315411
  0.22240000  -0.68315136
  0.22240000   0.68315410
  0.22240000  -0.68315137
  0.22240000   0.68315410
  0.22240000  -0.68315137
  0.22240000   0.68315410
  0.22320000  -0.68299549
  0.22320000   0.68299832
  0.22320000  -0.68299550
  0.22320000   0.68299832
  0.22320000  -0.68299550
  0.22320000   0.68299832
  0.22320000  -0.68299550
  0.22320000   0.68299831
  0.22320000  -0.68299550
  0.22320000   0.68299831
  0.22320000  -0.68299551
  0.22320000   0.68299831
  0.22320000  -0.68299551
  0.22320000   0.68299831
  0.22320000  -0.68299551
  0.22320000   0.68299830
  0.22320000  -0.68299552
  0.22320000   0.68299830
  0.22320000  -0.68299552
  0.22320000   0.68299830
  0.22320000  -0.68299552
  0.22320000   0.68299829
  0.22320000  -0.68299552
  0.22320000   0.68299829
  0.22320000  -0.68299553
  0.22320000   0.68299829
  0.22320000  -0.68299553
  0.22320000   0.68299829
  0.22320000  -0.68299553
  0.22320000   0.68299828
  0.22320000  -0.68299553
  0.22320000   0.68299828
  0.22320000  -0.68299554
  0.22320000   0.68299828
  0.22320000  -0.68299554
  0.22320000   0.68299827
  0.22320000  -0.68299554
  0.22320000   0.68299827
  0.22320000  -0.68299555
  0.22320000   0.68299827
  0.22400000  -0.68283950
  0.22400000   0.68284232
  0.22400000  -0.68283950
  0.22400000   0.68284232
  0.22400000  -0.68283950
  0.22400000   0.68284231
  0.22400000  -0.68283950
  0.22400000   0.68284231
  0.22400000  -0.68283951
  0.22400000   0.68284231
  0.22400000  -0.68283951
  0.22400000   0.68284230
  0.22400000  -0.68283951
  0.22400000   0.68284230
  0.22400000  -0.68283952
  0.22400000   0.68284230
  0.22400000  -0.68283952
  0.22400000   0.68284230
  0.22400000  -0.68283952
  0.22400000   0.68284229
  0.22400000  -0.68283952
  0.22400000   0.68284229
  0.22400000  -0.68283953
  0.22400000   0.68284229
  0.22400000  -0.68283953
  0.22400000   0.68284228
  0.22400000  -0.68283953
  0.22400000   0.68284228
  0.22400000  -0.68283954
  0.22400000   0.68284228
  0.22400000  -0.68283954
  0.22400000   0.68284228
  0.22400000  -0.68283954
  0.22400000   0.68284227
  0.22400000  -0.68283954
  0.22400000   0.68284227
  0.22400000  -0.68283955
  0.22400000   0.68284227
  0.22400000  -0.68283955
  0.22400000   0.68284227
  0.22480000  -0.68268333
  0.22480000   0.68268614
  0.22480000  -0.68268333
  0.22480000   0.68268614
  0.22480000  -0.68268333
  0.22480000   0.68268613
  0.22480000  -0.68268333
  0.22480000   0.68268613
  0.22480000  -0.68268334
  0.22480000   0.68268613
  0.22480000  -0.68268334
  0.22480000   0.68268613
  0.22480000  -0.68268334
  0.22480000   0.68268612
  0.22480000  -0.68268335
  0.22480000   0.68268612
  0.22480000  -0.68268335
  0.22480000   0.68268612
  0.22480000  -0.68268335
  0.22480000   0.68268612
  0.22480000  -0.68268335
  0.22480000   0.68268611
  0.22480000  -0.68268336
  0.22480000   0.68268611
  0.22480000  -0.68268336
  0.22480000   0.68268611
  0.22480000  -0.68268336
  0.22480000   0.68268610
  0.22480000  -0.68268336
  0.22480000   0.68268610
  0.22480000  -0.68268337
  0.22480000   0.68268610
  0.22480000  -0.68268337
  0.22480000   0.68268610
  0.22480000  -0.68268337
  0.22480000   0.68268609
  0.22480000  -0.68268338
  0.22480000   0.68268609
  0.22480000  -0.68268338
  0.22480000   0.68268609
  0.22560000  -0.68252698
  0.22560000   0.68252979
  0.22560000  -0.68252698
  0.22560000   0.68252978
  0.22560000  -0.68252699
  0.22560000   0.68252978
  0.22560000  -0.68252699
  0.22560000   0.68252978
  0.22560000  -0.68252699
  0.22560000   0.68252978
  0.22560000  -0.68252699
  0.22560000   0.68252977
  0.22560000  -0.68252700
  0.22560000   0.68252977
  0.22560000  -0.68252700
  0.22560000   0.68252977
  0.22560000  -0.68252700
  0.22560000   0.68252977
  0.22560000  -0.68252700
  0.22560000   0.68252976
  0.22560000  -0.68252701
  0.22560000   0.68252976
  0.22560000  -0.68252701
  0.22560000   0.68252976
  0.22560000  -0.68252701
  0.22560000   0.68252975
  0.22560000  -0.68252702
  0.22560000   0.68252975
  0.22560000  -0.68252702
  0.22560000   0.68252975
  0.22560000  -0.68252702
  0.22560000   0.68252975
  0.22560000  -0.68252702
  0.22560000   0.68252974
  0.22560000  -0.68252703
  0.22560000   0.68252974
  0.22560000  -0.68252703
  0.22560000   0.68252974
  0.22560000  -0.68252703
  0.22560000   0.68252974
  0.22640000  -0.68237046
  0.22640000   0.68237326
  0.22640000  -0.68237046
  0.22640000   0.68237326
  0.22640000  -0.68237046
  0.22640000   0.68237325
  0.22640000  -0.68237047
  0.22640000   0.68237325
  0.22640000  -0.68237047
  0.22640000   0.68237325
  0.22640000  -0.68237047
  0.22640000   0.68237325
  0.22640000  -0.68237048
  0.22640000   0.68237324
  0.22640000  -0.68237048
  0.22640000   0.68237324
  0.22640000  -0.68237048
  0.22640000   0.68237324
  0.22640000  -0.68237048
  0.22640000   0.68237323
  0.22640000  -0.68237049
  0.22640000   0.68237323
  0.22640000  -0.68237049
  0.22640000   0.68237323
  0.22640000  -0.68237049
  0.22640000   0.68237323
  0.22640000  -0.68237049
  0.22640000   0.68237322
  0.22640000  -0.68237050
  0.22640000   0.68237322
  0.22640000  -0.68237050
  0.22640000   0.68237322
  0.22640000  -0.68237050
  0.22640000   0.68237322
  0.22640000  -0.68237051
  0.22640000   0.68237321
  0.22640000  -0.68237051
  0.22640000   0.68237321
  0.22640000  -0.68237051
  0.22640000   0.68237321
  0.22720000  -0.68221376
  0.22720000   0.68221656
  0.22720000  -0.68221376
  0.22720000   0.68221655
  0.22720000  -0.68221377
  0.22720000   0.68221655
  0.22720000  -0.68221377
  0.22720000   0.68221655
  0.22720000  -0.68221377
  0.22720000   0.68221654
  0.22720000  -0.68221378
  0.22720000   0.68221654
  0.22720000  -0.68221378
  0.22720000   0.68221654
  0.22720000  -0.68221378
  0.22720000   0.68221654
  0.22720000  -0.68221378
  0.22720000   0.68221653
  0.22720000  -0.68221379
  0.22720000   0.68221653
  0.22720000  -0.68221379
  0.22720000   0.68221653
  0.22720000  -0.68221379
  0.22720000   0.68221653
  0.22720000  -0.68221380
  0.22720000   0.68221652
  0.22720000  -0.68221380
  0.22720000   0.68221652
  0.22720000  -0.68221380
  0.22720000   0.68221652
  0.22720000  -0.68221380
  0.22720000   0.68221651
  0.22720000  -0.68221381
  0.22720000   0.68221651
  0.22720000  -0.68221381
  0.22720000   0.68221651
  0.22720000  -0.68221381
  0.22720000   0.68221651
  0.22720000  -0.68221381
  0.22720000   0.68221650
  0.22800000  -0.68205689
  0.22800000   0.68205968
  0.22800000  -0.68205689
  0.22800000   0.68205967
  0.22800000  -0.68205690
  0.22800000   0.68205967
  0.22800000  -0.68205690
  0.22800000   0.68205967
  0.22800000  -0.68205690
  0.22800000   0.68205967
  0.22800000  -0.68205690
  0.22800000   0.68205966
  0.22800000  -0.68205691
  0.22800000   0.68205966
  0.22800000  -0.68205691
  0.22800000   0.68205966
  0.22800000  -0.68205691
  0.22800000   0.68205965
  0.22800000  -0.68205692
  0.22800000   0.68205965
  0.22800000  -0.68205692
  0.22800000   0.68205965
  0.22800000  -0.68205692
  0.22800000   0.68205965
  0.22800000  -0.68205692
  0.22800000   0.68205964
  0.22800000  -0.68205693
  0.22800000   0.68205964
  0.22800000  -0.68205693
  0.22800000   0.68205964
  0.22800000  -0.68205693
  0.22800000   0.68205964
  0.22800000  -0.68205693
  0.22800000   0.68205963
  0.22800000  -0.68205694
  0.22800000   0.68205963
  0.22800000  -0.68205694
  0.22800000   0.68205963
  0.22800000  -0.68205694
  0.22800000   0.68205962
  0.22880000  -0.68189984
  0.22880000   0.68190262
  0.22880000  -0.68189984
  0.22880000   0.68190262
  0.22880000  -0.68189985
  0.22880000   0.68190262
  0.22880000  -0.68189985
  0.22880000   0.68190261
  0.22880000  -0.68189985
  0.22880000   0.68190261
  0.22880000  -0.68189986
  0.22880000   0.68190261
  0.22880000  -0.68189986
  0.22880000   0.68190261
  0.22880000  -0.68189986
  0.22880000   0.68190260
  0.22880000  -0.68189986
  0.22880000   0.68190260
  0.22880000  -0.68189987
  0.22880000   0.68190260
  0.22880000  -0.68189987
  0.22880000   0.68190259
  0.22880000  -0.68189987
  0.22880000   0.68190259
  0.22880000  -0.68189988
  0.22880000   0.68190259
  0.22880000  -0.68189988
  0.22880000   0.68190259
  0.22880000  -0.68189988
  0.22880000   0.68190258
  0.22880000  -0.68189988
  0.22880000   0.68190258
  0.22880000  -0.68189989
  0.22880000   0.68190258
  0.22880000  -0.68189989
  0.22880000   0.68190258
  0.22880000  -0.68189989
  0.22880000   0.68190257
  0.22880000  -0.68189989
  0.22880000   0.68190257
  0.22960000  -0.68174262
  0.22960000   0.68174539
  0.22960000  -0.68174262
  0.22960000   0.68174539
  0.22960000  -0.68174262
  0.22960000   0.68174538
  0.22960000  -0.68174263
  0.22960000   0.68174538
  0.22960000  -0.68174263
  0.22960000   0.68174538
  0.22960000  -0.68174263
  0.22960000   0.68174538
  0.22960000  -0.68174263
  0.22960000   0.68174537
  0.22960000  -0.68174264
  0.22960000   0.68174537
  0.22960000  -0.68174264
  0.22960000   0.68174537
  0.22960000  -0.68174264
  0.22960000   0.68174537
  0.22960000  -0.68174265
  0.22960000   0.68174536
  0.22960000  -0.68174265
  0.22960000   0.68174536
  0.22960000  -0.68174265
  0.22960000   0.68174536
  0.22960000  -0.68174265
  0.22960000   0.68174535
  0.22960000  -0.68174266
  0.22960000   0.68174535
  0.22960000  -0.68174266
  0.22960000   0.68174535
  0.22960000  -0.68174266
  0.22960000   0.68174535
  0.22960000  -0.68174266
  0.22960000   0.68174534
  0.22960000  -0.68174267
  0.22960000   0.68174534
  0.22960000  -0.68174267
  0.22960000   0.68174534
  0.23040000  -0.68158522
  0.23040000   0.68158798
  0.23040000  -0.68158522
  0.23040000   0.68158798
  0.23040000  -0.68158522
  0.23040000   0.68158798
  0.23040000  -0.68158523
  0.23040000   0.68158797
  0.23040000  -0.68158523
  0.23040000   0.68158797
  0.23040000  -0.68158523
  0.23040000   0.68158797
  0.23040000  -0.68158523
  0.23040000   0.68158797
  0.23040000  -0.68158524
  0.23040000   0.68158796
  0.23040000  -0.68158524
  0.23040000   0.68158796
  0.23040000  -0.68158524
  0.23040000   0.68158796
  0.23040000  -0.68158524
  0.23040000   0.68158795
  0.23040000  -0.68158525
  0.23040000   0.68158795
  0.23040000  -0.68158525
  0.23040000   0.68158795
  0.23040000  -0.68158525
  0.23040000   0.68158795
  0.23040000  -0.68158526
  0.23040000   0.68158794
  0.23040000  -0.68158526
  0.23040000   0.68158794
  0.23040000  -0.68158526
  0.23040000   0.68158794
  0.23040000  -0.68158526
  0.23040000   0.68158794
  0.23040000  -0.68158527
  0.23040000   0.68158793
  0.23040000  -0.68158527
  0.23040000   0.68158793
  0.23120000  -0.68142764
  0.23120000   0.68143040
  0.23120000  -0.68142764
  0.23120000   0.68143039
  0.23120000  -0.68142764
  0.23120000   0.68143039
  0.23120000  -0.68142765
  0.23120000   0.68143039
  0.23120000  -0.68142765
  0.23120000   0.68143039
  0.23120000  -0.68142765
  0.23120000   0.68143038
  0.23120000  -0.68142766
  0.23120000   0.68143038
  0.23120000  -0.68142766
  0.23120000   0.68143038
  0.23120000  -0.68142766
  0.23120000   0.68143038
  0.23120000  -0.68142766
  0.23120000   0.68143037
  0.23120000  -0.68142767
  0.23120000   0.68143037
  0.23120000  -0.68142767
  0.23120000   0.68143037
  0.23120000  -0.68142767
  0.23120000   0.68143036
  0.23120000  -0.68142767
  0.23120000   0.68143036
  0.23120000  -0.68142768
  0.23120000   0.68143036
  0.23120000  -0.68142768
  0.23120000   0.68143036
  0.23120000  -0.68142768
  0.23120000   0.68143035
  0.23120000  -0.68142769
  0.23120000   0.68143035
  0.23120000  -0.68142769
  0.23120000   0.68143035
  0.23120000  -0.68142769
  0.23120000   0.68143035
  0.23200000  -0.68126988
  0.23200000   0.68127264
  0.23200000  -0.68126989
  0.23200000   0.68127263
  0.23200000  -0.68126989
  0.23200000   0.68127263
  0.23200000  -0.68126989
  0.23200000   0.68127263
  0.23200000  -0.68126989
  0.23200000   0.68127262
  0.23200000  -0.68126990
  0.23200000   0.68127262
  0.23200000  -0.68126990
  0.23200000   0.68127262
  0.23200000  -0.68126990
  0.23200000   0.68127262
  0.23200000  -0.68126991
  0.23200000   0.68127261
  0.23200000  -0.68126991
  0.23200000   0.68127261
  0.23200000  -0.68126991
  0.23200000   0.68127261
  0.23200000  -0.68126991
  0.23200000   0.68127260
  0.23200000  -0.68126992
  0.23200000   0.68127260
  0.23200000  -0.68126992
  0.23200000   0.68127260
  0.23200000  -0.68126992
  0.23200000   0.68127260
  0.23200000  -0.68126992
  0.23200000   0.68127259
  0.23200000  -0.68126993
  0.23200000   0.68127259
  0.23200000  -0.68126993
  0.23200000   0.68127259
  0.23200000  -0.68126993
  0.23200000   0.68127259
  0.23200000  -0.68126994
  0.23200000   0.68127258
  0.23280000  -0.68111195
  0.23280000   0.68111470
  0.23280000  -0.68111195
  0.23280000   0.68111469
  0.23280000  -0.68111196
  0.23280000   0.68111469
  0.23280000  -0.68111196
  0.23280000   0.68111469
  0.23280000  -0.68111196
  0.23280000   0.68111468
  0.23280000  -0.68111196
  0.23280000   0.68111468
  0.23280000  -0.68111197
  0.23280000   0.68111468
  0.23280000  -0.68111197
  0.23280000   0.68111468
  0.23280000  -0.68111197
  0.23280000   0.68111467
  0.23280000  -0.68111198
  0.23280000   0.68111467
  0.23280000  -0.68111198
  0.23280000   0.68111467
  0.23280000  -0.68111198
  0.23280000   0.68111467
  0.23280000  -0.68111198
  0.23280000   0.68111466
  0.23280000  -0.68111199
  0.23280000   0.68111466
  0.23280000  -0.68111199
  0.23280000   0.68111466
  0.23280000  -0.68111199
  0.23280000   0.68111465
  0.23280000  -0.68111199
  0.23280000   0.68111465
  0.23280000  -0.68111200
  0.23280000   0.68111465
  0.23280000  -0.68111200
  0.23280000   0.68111465
  0.23280000  -0.68111200
  0.23280000   0.68111464
  0.23360000  -0.68095384
  0.23360000   0.68095658
  0.23360000  -0.68095384
  0.23360000   0.68095657
  0.23360000  -0.68095385
  0.23360000   0.68095657
  0.23360000  -0.68095385
  0.23360000   0.68095657
  0.23360000  -0.68095385
  0.23360000   0.68095657
  0.23360000  -0.68095385
  0.23360000   0.68095656
  0.23360000  -0.68095386
  0.23360000   0.68095656
  0.23360000  -0.68095386
  0.23360000   0.68095656
  0.23360000  -0.68095386
  0.23360000   0.68095656
  0.23360000  -0.68095386
  0.23360000   0.68095655
  0.23360000  -0.68095387
  0.23360000   0.68095655
  0.23360000  -0.68095387
  0.23360000   0.68095655
  0.23360000  -0.68095387
  0.23360000   0.68095654
  0.23360000  -0.68095388
  0.23360000   0.68095654
  0.23360000  -0.68095388
  0.23360000   0.68095654
  0.23360000  -0.68095388
  0.23360000   0.68095654
  0.23360000  -0.68095388
  0.23360000   0.68095653
  0.23360000  -0.68095389
  0.23360000   0.68095653
  0.23360000  -0.68095389
  0.23360000   0.68095653
  0.23360000  -0.68095389
  0.23360000   0.68095653
  0.23440000  -0.68079555
  0.23440000   0.68079828
  0.23440000  -0.68079555
  0.23440000   0.68079828
  0.23440000  -0.68079556
  0.23440000   0.68079828
  0.23440000  -0.68079556
  0.23440000   0.68079827
  0.23440000  -0.68079556
  0.23440000   0.68079827
  0.23440000  -0.68079556
  0.23440000   0.68079827
  0.23440000  -0.68079557
  0.23440000   0.68079827
  0.23440000  -0.68079557
  0.23440000   0.68079826
  0.23440000  -0.68079557
  0.23440000   0.68079826
  0.23440000  -0.68079558
  0.23440000   0.68079826
  0.23440000  -0.68079558
  0.23440000   0.68079825
  0.23440000  -0.68079558
  0.23440000   0.68079825
  0.23440000  -0.68079558
  0.23440000   0.68079825
  0.23440000  -0.68079559
  0.23440000   0.68079825
  0.23440000  -0.68079559
  0.23440000   0.68079824
  0.23440000  -0.68079559
  0.23440000   0.68079824
  0.23440000  -0.68079559
  0.23440000   0.68079824
  0.23440000  -0.68079560
  0.23440000   0.68079824
  0.23440000  -0.68079560
  0.23440000   0.68079823
  0.23440000  -0.68079560
  0.23440000   0.68079823
  0.23520000  -0.68063708
  0.23520000   0.68063981
  0.23520000  -0.68063709
  0.23520000   0.68063980
  0.23520000  -0.68063709
  0.23520000   0.68063980
  0.23520000  -0.68063709
  0.23520000   0.68063980
  0.23520000  -0.68063709
  0.23520000   0.68063980
  0.23520000  -0.68063710
  0.23520000   0.68063979
  0.23520000  -0.68063710
  0.23520000   0.68063979
  0.23520000  -0.68063710
  0.23520000   0.68063979
  0.23520000  -0.68063711
  0.23520000   0.68063979
  0.23520000  -0.68063711
  0.23520000   0.68063978
  0.23520000  -0.68063711
  0.23520000   0.68063978
  0.23520000  -0.68063711
  0.23520000   0.68063978
  0.23520000  -0.68063712
  0.23520000   0.68063977
  0.23520000  -0.68063712
  0.23520000   0.68063977
  0.23520000  -0.68063712
  0.23520000   0.68063977
  0.23520000  -0.68063712
  0.23520000   0.68063977
  0.23520000  -0.68063713
  0.23520000   0.68063976
  0.23520000  -0.68063713
  0.23520000   0.68063976
  0.23520000  -0.68063713
  0.23520000   0.68063976
  0.23520000  -0.68063713
  0.23520000   0.68063976
  0.23600000  -0.68047844
  0.23600000   0.68048115
  0.23600000  -0.68047844
  0.23600000   0.68048115
  0.23600000  -0.68047844
  0.23600000   0.68048115
  0.23600000  -0.68047845
  0.23600000   0.68048115
  0.23600000  -0.68047845
  0.23600000   0.68048114
  0.23600000  -0.68047845
  0.23600000   0.68048114
  0.23600000  -0.68047845
  0.23600000   0.68048114
  0.23600000  -0.68047846
  0.23600000   0.68048113
  0.23600000  -0.68047846
  0.23600000   0.68048113
  0.23600000  -0.68047846
  0.23600000   0.68048113
  0.23600000  -0.68047846
  0.23600000   0.68048113
  0.23600000  -0.68047847
  0.23600000   0.68048112
  0.23600000  -0.68047847
  0.23600000   0.68048112
  0.23600000  -0.68047847
  0.23600000   0.68048112
  0.23600000  -0.68047848
  0.23600000   0.68048112
  0.23600000  -0.68047848
  0.23600000   0.68048111
  0.23600000  -0.68047848
  0.23600000   0.68048111
  0.23600000  -0.68047848
  0.23600000   0.68048111
  0.23600000  -0.68047849
  0.23600000   0.68048111
  0.23600000  -0.68047849
  0.23600000   0.68048110
  0.23680000  -0.68031961
  0.23680000   0.68032232
  0.23680000  -0.68031961
  0.23680000   0.68032232
  0.23680000  -0.68031962
  0.23680000   0.68032232
  0.23680000  -0.68031962
  0.23680000   0.68032231
  0.23680000  -0.68031962
  0.23680000   0.68032231
  0.23680000  -0.68031963
  0.23680000   0.68032231
  0.23680000  -0.68031963
  0.23680000   0.68032231
  0.23680000  -0.68031963
  0.23680000   0.68032230
  0.23680000  -0.68031963
  0.23680000   0.68032230
  0.23680000  -0.68031964
  0.23680000   0.68032230
  0.23680000  -0.68031964
  0.23680000   0.68032229
  0.23680000  -0.68031964
  0.23680000   0.68032229
  0.23680000  -0.68031964
  0.23680000   0.68032229
  0.23680000  -0.68031965
  0.23680000   0.68032229
  0.23680000  -0.68031965
  0.23680000   0.68032228
  0.23680000  -0.68031965
  0.23680000   0.68032228
  0.23680000  -0.68031966
  0.23680000   0.68032228
  0.23680000  -0.68031966
  0.23680000   0.68032228
  0.23680000  -0.68031966
  0.23680000   0.68032227
  0.23680000  -0.68031966
  0.23680000   0.68032227
  0.23760000  -0.68016061
  0.23760000   0.68016331
  0.23760000  -0.68016061
  0.23760000   0.68016331
  0.23760000  -0.68016061
  0.23760000   0.68016330
  0.23760000  -0.68016062
  0.23760000   0.68016330
  0.23760000  -0.68016062
  0.23760000   0.68016330
  0.23760000  -0.68016062
  0.23760000   0.68016330
  0.23760000  -0.68016062
  0.23760000   0.68016329
  0.23760000  -0.68016063
  0.23760000   0.68016329
  0.23760000  -0.68016063
  0.23760000   0.68016329
  0.23760000  -0.68016063
  0.23760000   0.68016329
  0.23760000  -0.68016063
  0.23760000   0.68016328
  0.23760000  -0.68016064
  0.23760000   0.68016328
  0.23760000  -0.68016064
  0.23760000   0.68016328
  0.23760000  -0.68016064
  0.23760000   0.68016327
  0.23760000  -0.68016065
  0.23760000   0.68016327
  0.23760000  -0.68016065
  0.23760000   0.68016327
  0.23760000  -0.68016065
  0.23760000   0.68016327
  0.23760000  -0.68016065
  0.23760000   0.68016326
  0.23760000  -0.68016066
  0.23760000   0.68016326
  0.23760000  -0.68016066
  0.23760000   0.68016326
  0.23840000  -0.68000142
  0.23840000   0.68000412
  0.23840000  -0.68000143
  0.23840000   0.68000412
  0.23840000  -0.68000143
  0.23840000   0.68000411
  0.23840000  -0.68000143
  0.23840000   0.68000411
  0.23840000  -0.68000143
  0.23840000   0.68000411
  0.23840000  -0.68000144
  0.23840000   0.68000410
  0.23840000  -0.68000144
  0.23840000   0.68000410
  0.23840000  -0.68000144
  0.23840000   0.68000410
  0.23840000  -0.68000144
  0.23840000   0.68000410
  0.23840000  -0.68000145
  0.23840000   0.68000409
  0.23840000  -0.68000145
  0.23840000   0.68000409
  0.23840000  -0.68000145
  0.23840000   0.68000409
  0.23840000  -0.68000146
  0.23840000   0.68000409
  0.23840000  -0.68000146
  0.23840000   0.68000408
  0.23840000  -0.68000146
  0.23840000   0.68000408
  0.23840000  -0.68000146
  0.23840000   0.68000408
  0.23840000  -0.68000147
  0.23840000   0.68000408
  0.23840000  -0.68000147
  0.23840000   0.68000407
  0.23840000  -0.68000147
  0.23840000   0.68000407
  0.23840000  -0.68000147
  0.23840000   0.68000407
  0.23920000  -0.67984206
  0.23920000   0.67984475
  0.23920000  -0.67984206
  0.23920000   0.67984474
  0.23920000  -0.67984206
  0.23920000   0.67984474
  0.23920000  -0.67984207
  0.23920000   0.67984474
  0.23920000  -0.67984207
  0.23920000   0.67984474
  0.23920000  -0.67984207
  0.23920000   0.67984473
  0.23920000  -0.67984207
  0.23920000   0.67984473
  0.23920000  -0.67984208
  0.23920000   0.67984473
  0.23920000  -0.67984208
  0.23920000   0.67984472
  0.23920000  -0.67984208
  0.23920000   0.67984472
  0.23920000  -0.67984209
  0.23920000   0.67984472
  0.23920000  -0.67984209
  0.23920000   0.67984472
  0.23920000  -0.67984209
  0.23920000   0.67984471
  0.23920000  -0.67984209
  0.23920000   0.67984471
  0.23920000  -0.67984210
  0.23920000   0.67984471
  0.23920000  -0.67984210
  0.23920000   0.67984471
  0.23920000  -0.67984210
  0.23920000   0.67984470
  0.23920000  -0.67984210
  0.23920000   0.67984470
  0.23920000  -0.67984211
  0.23920000   0.67984470
  0.23920000  -0.67984211
  0.23920000   0.67984470
  0.24000000  -0.67968251
  0.24000000   0.67968519
  0.24000000  -0.67968252
  0.24000000   0.67968519
  0.24000000  -0.67968252
  0.24000000   0.67968519
  0.24000000  -0.67968252
  0.24000000   0.67968519
  0.24000000  -0.67968252
  0.24000000   0.67968518
  0.24000000  -0.67968253
  0.24000000   0.67968518
  0.24000000  -0.67968253
  0.24000000   0.67968518
  0.24000000  -0.67968253
  0.24000000   0.67968518
  0.24000000  -0.67968253
  0.24000000   0.67968517
  0.24000000  -0.67968254
  0.24000000   0.67968517
  0.24000000  -0.67968254
  0.24000000   0.67968517
  0.24000000  -0.67968254
  0.24000000   0.67968516
  0.24000000  -0.67968255
  0.24000000   0.67968516
  0.24000000  -0.67968255
  0.24000000   0.67968516
  0.24000000  -0.67968255
  0.24000000   0.67968516
  0.24000000  -0.67968255
  0.24000000   0.67968515
  0.24000000  -0.67968256
  0.24000000   0.67968515
  0.24000000  -0.67968256
  0.24000000   0.67968515
  0.24000000  -0.67968256
  0.24000000   0.67968515
  0.24000000  -0.67968256
  0.24000000   0.67968514
  0.24080000  -0.67952279
  0.24080000   0.67952546
  0.24080000  -0.67952279
  0.24080000   0.67952546
  0.24080000  -0.67952279
  0.24080000   0.67952546
  0.24080000  -0.67952280
  0.24080000   0.67952545
  0.24080000  -0.67952280
  0.24080000   0.67952545
  0.24080000  -0.67952280
  0.24080000   0.67952545
  0.24080000  -0.67952280
  0.24080000   0.67952545
  0.24080000  -0.67952281
  0.24080000   0.67952544
  0.24080000  -0.67952281
  0.24080000   0.67952544
  0.24080000  -0.67952281
  0.24080000   0.67952544
  0.24080000  -0.67952281
  0.24080000   0.67952543
  0.24080000  -0.67952282
  0.24080000   0.67952543
  0.24080000  -0.67952282
  0.24080000   0.67952543
  0.24080000  -0.67952282
  0.24080000   0.67952543
  0.24080000  -0.67952282
  0.24080000   0.67952542
  0.24080000  -0.67952283
  0.24080000   0.67952542
  0.24080000  -0.67952283
  0.24080000   0.67952542
  0.24080000  -0.67952283
  0.24080000   0.67952542
  0.24080000  -0.67952283
  0.24080000   0.67952541
  0.24080000  -0.67952284
  0.24080000   0.67952541
  0.24160000  -0.67936288
  0.24160000   0.67936555
  0.24160000  -0.67936288
  0.24160000   0.67936554
  0.24160000  -0.67936289
  0.24160000   0.67936554
  0.24160000  -0.67936289
  0.24160000   0.67936554
  0.24160000  -0.67936289
  0.24160000   0.67936554
  0.24160000  -0.67936289
  0.24160000   0.67936553
  0.24160000  -0.67936290
  0.24160000   0.67936553
  0.24160000  -0.67936290
  0.24160000   0.67936553
  0.24160000  -0.67936290
  0.24160000   0.67936553
  0.24160000  -0.67936290
  0.24160000   0.67936552
  0.24160000  -0.67936291
  0.24160000   0.67936552
  0.24160000  -0.67936291
  0.24160000   0.67936552
  0.24160000  -0.67936291
  0.24160000   0.67936552
  0.24160000  -0.67936291
  0.24160000   0.67936551
  0.24160000  -0.67936292
  0.24160000   0.67936551
  0.24160000  -0.67936292
  0.24160000   0.67936551
  0.24160000  -0.67936292
  0.24160000   0.67936551
  0.24160000  -0.67936293
  0.24160000   0.67936550
  0.24160000  -0.67936293
  0.24160000   0.67936550
  0.24160000  -0.67936293
  0.24160000   0.67936550
  0.24240000  -0.67920279
  0.24240000   0.67920545
  0.24240000  -0.67920279
  0.24240000   0.67920545
  0.24240000  -0.67920280
  0.24240000   0.67920545
  0.24240000  -0.67920280
  0.24240000   0.67920544
  0.24240000  -0.67920280
  0.24240000   0.67920544
  0.24240000  -0.67920281
  0.24240000   0.67920544
  0.24240000  -0.67920281
  0.24240000   0.67920544
  0.24240000  -0.67920281
  0.24240000   0.67920543
  0.24240000  -0.67920281
  0.24240000   0.67920543
  0.24240000  -0.67920282
  0.24240000   0.67920543
  0.24240000  -0.67920282
  0.24240000   0.67920543
  0.24240000  -0.67920282
  0.24240000   0.67920542
  0.24240000  -0.67920282
  0.24240000   0.67920542
  0.24240000  -0.67920283
  0.24240000   0.67920542
  0.24240000  -0.67920283
  0.24240000   0.67920542
  0.24240000  -0.67920283
  0.24240000   0.67920541
  0.24240000  -0.67920283
  0.24240000   0.67920541
  0.24240000  -0.67920284
  0.24240000   0.67920541
  0.24240000  -0.67920284
  0.24240000   0.67920541
  0.24240000  -0.67920284
  0.24240000   0.67920540
  0.24320000  -0.67904252
  0.24320000   0.67904518
  0.24320000  -0.67904252
  0.24320000   0.67904517
  0.24320000  -0.67904253
  0.24320000   0.67904517
  0.24320000  -0.67904253
  0.24320000   0.67904517
  0.24320000  -0.67904253
  0.24320000   0.67904516
  0.24320000  -0.67904254
  0.24320000   0.67904516
  0.24320000  -0.67904254
  0.24320000   0.67904516
  0.24320000  -0.67904254
  0.24320000   0.67904516
  0.24320000  -0.67904254
  0.24320000   0.67904515
  0.24320000  -0.67904255
  0.24320000   0.67904515
  0.24320000  -0.67904255
  0.24320000   0.67904515
  0.24320000  -0.67904255
  0.24320000   0.67904515
  0.24320000  -0.67904255
  0.24320000   0.67904514
  0.24320000  -0.67904256
  0.24320000   0.67904514
  0.24320000  -0.67904256
  0.24320000   0.67904514
  0.24320000  -0.67904256
  0.24320000   0.67904514
  0.24320000  -0.67904256
  0.24320000   0.67904513
  0.24320000  -0.67904257
  0.24320000   0.67904513
  0.24320000  -0.67904257
  0.24320000   0.67904513
  0.24320000  -0.67904257
  0.24320000   0.67904513
  0.24400000  -0.67888207
  0.24400000   0.67888472
  0.24400000  -0.67888207
  0.24400000   0.67888471
  0.24400000  -0.67888208
  0.24400000   0.67888471
  0.24400000  -0.67888208
  0.24400000   0.67888471
  0.24400000  -0.67888208
  0.24400000   0.67888471
  0.24400000  -0.67888208
  0.24400000   0.67888470
  0.24400000  -0.67888209
  0.24400000   0.67888470
  0.24400000  -0.67888209
  0.24400000   0.67888470
  0.24400000  -0.67888209
  0.24400000   0.67888470
  0.24400000  -0.67888209
  0.24400000   0.67888469
  0.24400000  -0.67888210
  0.24400000   0.67888469
  0.24400000  -0.67888210
  0.24400000   0.67888469
  0.24400000  -0.67888210
  0.24400000   0.67888468
  0.24400000  -0.67888210
  0.24400000   0.67888468
  0.24400000  -0.67888211
  0.24400000   0.67888468
  0.24400000  -0.67888211
  0.24400000   0.67888468
  0.24400000  -0.67888211
  0.24400000   0.67888467
  0.24400000  -0.67888211
  0.24400000   0.67888467
  0.24400000  -0.67888212
  0.24400000   0.67888467
  0.24400000  -0.67888212
  0.24400000   0.67888467
  0.24480000  -0.67872144
  0.24480000   0.67872408
  0.24480000  -0.67872144
  0.24480000   0.67872407
  0.24480000  -0.67872144
  0.24480000   0.67872407
  0.24480000  -0.67872144
  0.24480000   0.67872407
  0.24480000  -0.67872145
  0.24480000   0.67872406
  0.24480000  -0.67872145
  0.24480000   0.67872406
  0.24480000  -0.67872145
  0.24480000   0.67872406
  0.24480000  -0.67872145
  0.24480000   0.67872406
  0.24480000  -0.67872146
  0.24480000   0.67872405
  0.24480000  -0.67872146
  0.24480000   0.67872405
  0.24480000  -0.67872146
  0.24480000   0.67872405
  0.24480000  -0.67872146
  0.24480000   0.67872405
  0.24480000  -0.67872147
  0.24480000   0.67872404
  0.24480000  -0.67872147
  0.24480000   0.67872404
  0.24480000  -0.67872147
  0.24480000   0.67872404
  0.24480000  -0.67872148
  0.24480000   0.67872404
  0.24480000  -0.67872148
  0.24480000   0.67872403
  0.24480000  -0.67872148
  0.24480000   0.67872403
  0.24480000  -0.67872148
  0.24480000   0.67872403
  0.24480000  -0.67872149
  0.24480000   0.67872403
  0.24560000  -0.67856062
  0.24560000   0.67856325
  0.24560000  -0.67856062
  0.24560000   0.67856325
  0.24560000  -0.67856062
  0.24560000   0.67856325
  0.24560000  -0.67856063
  0.24560000   0.67856324
  0.24560000  -0.67856063
  0.24560000   0.67856324
  0.24560000  -0.67856063
  0.24560000   0.67856324
  0.24560000  -0.67856063
  0.24560000   0.67856324
  0.24560000  -0.67856064
  0.24560000   0.67856323
  0.24560000  -0.67856064
  0.24560000   0.67856323
  0.24560000  -0.67856064
  0.24560000   0.67856323
  0.24560000  -0.67856065
  0.24560000   0.67856322
  0.24560000  -0.67856065
  0.24560000   0.67856322
  0.24560000  -0.67856065
  0.24560000   0.67856322
  0.24560000  -0.67856065
  0.24560000   0.67856322
  0.24560000  -0.67856066
  0.24560000   0.67856321
  0.24560000  -0.67856066
  0.24560000   0.67856321
  0.24560000  -0.67856066
  0.24560000   0.67856321
  0.24560000  -0.67856066
  0.24560000   0.67856321
  0.24560000  -0.67856067
  0.24560000   0.67856320
  0.24560000  -0.67856067
  0.24560000   0.67856320
  0.24640000  -0.67839962
  0.24640000   0.67840224
  0.24640000  -0.67839962
  0.24640000   0.67840224
  0.24640000  -0.67839962
  0.24640000   0.67840224
  0.24640000  -0.67839963
  0.24640000   0.67840224
  0.24640000  -0.67839963
  0.24640000   0.67840223
  0.24640000  -0.67839963
  0.24640000   0.67840223
  0.24640000  -0.67839963
  0.24640000   0.67840223
  0.24640000  -0.67839964
  0.24640000   0.67840223
  0.24640000  -0.67839964
  0.24640000   0.67840222
  0.24640000  -0.67839964
  0.24640000   0.67840222
  0.24640000  -0.67839965
  0.24640000   0.67840222
  0.24640000  -0.67839965
  0.24640000   0.67840222
  0.24640000  -0.67839965
  0.24640000   0.67840221
  0.24640000  -0.67839965
  0.24640000   0.67840221
  0.24640000  -0.67839966
  0.24640000   0.67840221
  0.24640000  -0.67839966
  0.24640000   0.67840221
  0.24640000  -0.67839966
  0.24640000   0.67840220
  0.24640000  -0.67839966
  0.24640000   0.67840220
  0.24640000  -0.67839967
  0.24640000   0.67840220
  0.24640000  -0.67839967
  0.24640000   0.67840220
  0.24720000  -0.67823844
  0.24720000   0.67824105
  0.24720000  -0.67823844
  0.24720000   0.67824105
  0.24720000  -0.67823844
  0.24720000   0.67824105
  0.24720000  -0.67823844
  0.24720000   0.67824105
  0.24720000  -0.67823845
  0.24720000   0.67824104
  0.24720000  -0.67823845
  0.24720000   0.67824104
  0.24720000  -0.67823845
  0.24720000   0.67824104
  0.24720000  -0.67823845
  0.24720000   0.67824104
  0.24720000  -0.67823846
  0.24720000   0.67824103
  0.24720000  -0.67823846
  0.24720000   0.67824103
  0.24720000  -0.67823846
  0.24720000   0.67824103
  0.24720000  -0.67823846
  0.24720000   0.67824103
  0.24720000  -0.67823847
  0.24720000   0.67824102
  0.24720000  -0.67823847
  0.24720000   0.67824102
  0.24720000  -0.67823847
  0.24720000   0.67824102
  0.24720000  -0.67823847
  0.24720000   0.67824102
  0.24720000  -0.67823848
  0.24720000   0.67824101
  0.24720000  -0.67823848
  0.24720000   0.67824101
  0.24720000  -0.67823848
  0.24720000   0.67824101
  0.24720000  -0.67823848
  0.24720000   0.67824101
  0.24800000  -0.67807707
  0.24800000   0.67807968
  0.24800000  -0.67807707
  0.24800000   0.67807968
  0.24800000  -0.67807707
  0.24800000   0.67807967
  0.24800000  -0.67807708
  0.24800000   0.67807967
  0.24800000  -0.67807708
  0.24800000   0.67807967
  0.24800000  -0.67807708
  0.24800000   0.67807967
  0.24800000  -0.67807708
  0.24800000   0.67807966
  0.24800000  -0.67807709
  0.24800000   0.67807966
  0.24800000  -0.67807709
  0.24800000   0.67807966
  0.24800000  -0.67807709
  0.24800000   0.67807966
  0.24800000  -0.67807709
  0.24800000   0.67807965
  0.24800000  -0.67807710
  0.24800000   0.67807965
  0.24800000  -0.67807710
  0.24800000   0.67807965
  0.24800000  -0.67807710
  0.24800000   0.67807965
  0.24800000  -0.67807710
  0.24800000   0.67807964
  0.24800000  -0.67807711
  0.24800000   0.67807964
  0.24800000  -0.67807711
  0.24800000   0.67807964
  0.24800000  -0.67807711
  0.24800000   0.67807964
  0.24800000  -0.67807711
  0.24800000   0.67807963
  0.24800000  -0.67807712
  0.24800000   0.67807963
  0.24880000  -0.67791552
  0.24880000   0.67791812
  0.24880000  -0.67791552
  0.24880000   0.67791812
  0.24880000  -0.67791552
  0.24880000   0.67791812
  0.24880000  -0.67791553
  0.24880000   0.67791811
  0.24880000  -0.67791553
  0.24880000   0.67791811
  0.24880000  -0.67791553
  0.24880000   0.67791811
  0.24880000  -0.67791553
  0.24880000   0.67791811
  0.24880000  -0.67791554
  0.24880000   0.67791810
  0.24880000  -0.67791554
  0.24880000   0.67791810
  0.24880000  -0.67791554
  0.24880000   0.67791810
  0.24880000  -0.67791554
  0.24880000   0.67791810
  0.24880000  -0.67791555
  0.24880000   0.67791809
  0.24880000  -0.67791555
  0.24880000   0.67791809
  0.24880000  -0.67791555
  0.24880000   0.67791809
  0.24880000  -0.67791555
  0.24880000   0.67791809
  0.24880000  -0.67791556
  0.24880000   0.67791808
  0.24880000  -0.67791556
  0.24880000   0.67791808
  0.24880000  -0.67791556
  0.24880000   0.67791808
  0.24880000  -0.67791556
  0.24880000   0.67791808
  0.24880000  -0.67791557
  0.24880000   0.67791807
  0.24960000  -0.67775378
  0.24960000   0.67775638
  0.24960000  -0.67775378
  0.24960000   0.67775638
  0.24960000  -0.67775379
  0.24960000   0.67775637
  0.24960000  -0.67775379
  0.24960000   0.67775637
  0.24960000  -0.67775379
  0.24960000   0.67775637
  0.24960000  -0.67775380
  0.24960000   0.67775637
  0.24960000  -0.67775380
  0.24960000   0.67775636
  0.24960000  -0.67775380
  0.24960000   0.67775636
  0.24960000  -0.67775380
  0.24960000   0.67775636
  0.24960000  -0.67775381
  0.24960000   0.67775636
  0.24960000  -0.67775381
  0.24960000   0.67775635
  0.24960000  -0.67775381
  0.24960000   0.67775635
  0.24960000  -0.67775381
  0.24960000   0.67775635
  0.24960000  -0.67775382
  0.24960000   0.67775635
  0.24960000  -0.67775382
  0.24960000   0.67775634
  0.24960000  -0.67775382
  0.24960000   0.67775634
  0.24960000  -0.67775382
  0.24960000   0.67775634
  0.24960000  -0.67775383
  0.24960000   0.67775634
  0.24960000  -0.67775383
  0.24960000   0.67775633
  0.24960000  -0.67775383
  0.24960000   0.67775633
  0.25040000  -0.67759186
  0.25040000   0.67759445
  0.25040000  -0.67759186
  0.25040000   0.67759445
  0.25040000  -0.67759187
  0.25040000   0.67759445
  0.25040000  -0.67759187
  0.25040000   0.67759445
  0.25040000  -0.67759187
  0.25040000   0.67759444
  0.25040000  -0.67759188
  0.25040000   0.67759444
  0.25040000  -0.67759188
  0.25040000   0.67759444
  0.25040000  -0.67759188
  0.25040000   0.67759444
  0.25040000  -0.67759188
  0.25040000   0.67759443
  0.25040000  -0.67759189
  0.25040000   0.67759443
  0.25040000  -0.67759189
  0.25040000   0.67759443
  0.25040000  -0.67759189
  0.25040000   0.67759442
  0.25040000  -0.67759189
  0.25040000   0.67759442
  0.25040000  -0.67759190
  0.25040000   0.67759442
  0.25040000  -0.67759190
  0.25040000   0.67759442
  0.25040000  -0.67759190
  0.25040000   0.67759441
  0.25040000  -0.67759190
  0.25040000   0.67759441
  0.25040000  -0.67759191
  0.25040000   0.67759441
  0.25040000  -0.67759191
  0.25040000   0.67759441
  0.25040000  -0.67759191
  0.25040000   0.67759440
  0.25120000  -0.67742976
  0.25120000   0.67743234
  0.25120000  -0.67742976
  0.25120000   0.67743234
  0.25120000  -0.67742976
  0.25120000   0.67743234
  0.25120000  -0.67742977
  0.25120000   0.67743233
  0.25120000  -0.67742977
  0.25120000   0.67743233
  0.25120000  -0.67742977
  0.25120000   0.67743233
  0.25120000  -0.67742977
  0.25120000   0.67743233
  0.25120000  -0.67742978
  0.25120000   0.67743232
  0.25120000  -0.67742978
  0.25120000   0.67743232
  0.25120000  -0.67742978
  0.25120000   0.67743232
  0.25120000  -0.67742978
  0.25120000   0.67743232
  0.25120000  -0.67742979
  0.25120000   0.67743231
  0.25120000  -0.67742979
  0.25120000   0.67743231
  0.25120000  -0.67742979
  0.25120000   0.67743231
  0.25120000  -0.67742979
  0.25120000   0.67743231
  0.25120000  -0.67742980
  0.25120000   0.67743230
  0.25120000  -0.67742980
  0.25120000   0.67743230
  0.25120000  -0.67742980
  0.25120000   0.67743230
  0.25120000  -0.67742980
  0.25120000   0.67743230
  0.25120000  -0.67742981
  0.25120000   0.67743229
  0.25200000  -0.67726747
  0.25200000   0.67727004
  0.25200000  -0.67726747
  0.25200000   0.67727004
  0.25200000  -0.67726747
  0.25200000   0.67727004
  0.25200000  -0.67726748
  0.25200000   0.67727004
  0.25200000  -0.67726748
  0.25200000   0.67727003
  0.25200000  -0.67726748
  0.25200000   0.67727003
  0.25200000  -0.67726748
  0.25200000   0.67727003
  0.25200000  -0.67726749
  0.25200000   0.67727003
  0.25200000  -0.67726749
  0.25200000   0.67727002
  0.25200000  -0.67726749
  0.25200000   0.67727002
  0.25200000  -0.67726749
  0.25200000   0.67727002
  0.25200000  -0.67726750
  0.25200000   0.67727002
  0.25200000  -0.67726750
  0.25200000   0.67727001
  0.25200000  -0.67726750
  0.25200000   0.67727001
  0.25200000  -0.67726750
  0.25200000   0.67727001
  0.25200000  -0.67726751
  0.25200000   0.67727001
  0.25200000  -0.67726751
  0.25200000   0.67727000
  0.25200000  -0.67726751
  0.25200000   0.67727000
  0.25200000  -0.67726751
  0.25200000   0.67727000
  0.25200000  -0.67726752
  0.25200000   0.67727000
  0.25280000  -0.67710499
  0.25280000   0.67710756
  0.25280000  -0.67710499
  0.25280000   0.67710756
  0.25280000  -0.67710500
  0.25280000   0.67710756
  0.25280000  -0.67710500
  0.25280000   0.67710755
  0.25280000  -0.67710500
  0.25280000   0.67710755
  0.25280000  -0.67710500
  0.25280000   0.67710755
  0.25280000  -0.67710501
  0.25280000   0.67710755
  0.25280000  -0.67710501
  0.25280000   0.67710754
  0.25280000  -0.67710501
  0.25280000   0.67710754
  0.25280000  -0.67710501
  0.25280000   0.67710754
  0.25280000  -0.67710502
  0.25280000   0.67710754
  0.25280000  -0.67710502
  0.25280000   0.67710753
  0.25280000  -0.67710502
  0.25280000   0.67710753
  0.25280000  -0.67710502
  0.25280000   0.67710753
  0.25280000  -0.67710503
  0.25280000   0.67710753
  0.25280000  -0.67710503
  0.25280000   0.67710752
  0.25280000  -0.67710503
  0.25280000   0.67710752
  0.25280000  -0.67710503
  0.25280000   0.67710752
  0.25280000  -0.67710504
  0.25280000   0.67710752
  0.25280000  -0.67710504
  0.25280000   0.67710751
  0.25360000  -0.67694233
  0.25360000   0.67694489
  0.25360000  -0.67694233
  0.25360000   0.67694489
  0.25360000  -0.67694234
  0.25360000   0.67694489
  0.25360000  -0.67694234
  0.25360000   0.67694489
  0.25360000  -0.67694234
  0.25360000   0.67694488
  0.25360000  -0.67694234
  0.25360000   0.67694488
  0.25360000  -0.67694235
  0.25360000   0.67694488
  0.25360000  -0.67694235
  0.25360000   0.67694488
  0.25360000  -0.67694235
  0.25360000   0.67694487
  0.25360000  -0.67694235
  0.25360000   0.67694487
  0.25360000  -0.67694236
  0.25360000   0.67694487
  0.25360000  -0.67694236
  0.25360000   0.67694487
  0.25360000  -0.67694236
  0.25360000   0.67694486
  0.25360000  -0.67694236
  0.25360000   0.67694486
  0.25360000  -0.67694237
  0.25360000   0.67694486
  0.25360000  -0.67694237
  0.25360000   0.67694486
  0.25360000  -0.67694237
  0.25360000   0.67694485
  0.25360000  -0.67694237
  0.25360000   0.67694485
  0.25360000  -0.67694238
  0.25360000   0.67694485
  0.25360000  -0.67694238
  0.25360000   0.67694485
  0.25440000  -0.67677948
  0.25440000   0.67678204
  0.25440000  -0.67677948
  0.25440000   0.67678204
  0.25440000  -0.67677949
  0.25440000   0.67678203
  0.25440000  -0.67677949
  0.25440000   0.67678203
  0.25440000  -0.67677949
  0.25440000   0.67678203
  0.25440000  -0.67677949
  0.25440000   0.67678203
  0.25440000  -0.67677950
  0.25440000   0.67678202
  0.25440000  -0.67677950
  0.25440000   0.67678202
  0.25440000  -0.67677950
  0.25440000   0.67678202
  0.25440000  -0.67677950
  0.25440000   0.67678202
  0.25440000  -0.67677951
  0.25440000   0.67678201
  0.25440000  -0.67677951
  0.25440000   0.67678201
  0.25440000  -0.67677951
  0.25440000   0.67678201
  0.25440000  -0.67677952
  0.25440000   0.67678201
  0.25440000  -0.67677952
  0.25440000   0.67678200
  0.25440000  -0.67677952
  0.25440000   0.67678200
  0.25440000  -0.67677952
  0.25440000   0.67678200
  0.25440000  -0.67677952
  0.25440000   0.67678200
  0.25440000  -0.67677953
  0.25440000   0.67678199
  0.25440000  -0.67677953
  0.25440000   0.67678199
  0.25520000  -0.67661645
  0.25520000   0.67661900
  0.25520000  -0.67661645
  0.25520000   0.67661899
  0.25520000  -0.67661645
  0.25520000   0.67661899
  0.25520000  -0.67661645
  0.25520000   0.67661899
  0.25520000  -0.67661646
  0.25520000   0.67661899
  0.25520000  -0.67661646
  0.25520000   0.67661898
  0.25520000  -0.67661646
  0.25520000   0.67661898
  0.25520000  -0.67661647
  0.25520000   0.67661898
  0.25520000  -0.67661647
  0.25520000   0.67661898
  0.25520000  -0.67661647
  0.25520000   0.67661897
  0.25520000  -0.67661647
  0.25520000   0.67661897
  0.25520000  -0.67661648
  0.25520000   0.67661897
  0.25520000  -0.67661648
  0.25520000   0.67661897
  0.25520000  -0.67661648
  0.25520000   0.67661896
  0.25520000  -0.67661648
  0.25520000   0.67661896
  0.25520000  -0.67661649
  0.25520000   0.67661896
  0.25520000  -0.67661649
  0.25520000   0.67661896
  0.25520000  -0.67661649
  0.25520000   0.67661895
  0.25520000  -0.67661649
  0.25520000   0.67661895
  0.25520000  -0.67661649
  0.25520000   0.67661895
  0.25600000  -0.67645323
  0.25600000   0.67645577
  0.25600000  -0.67645323
  0.25600000   0.67645577
  0.25600000  -0.67645323
  0.25600000   0.67645576
  0.25600000  -0.67645323
  0.25600000   0.67645576
  0.25600000  -0.67645324
  0.25600000   0.67645576
  0.25600000  -0.67645324
  0.25600000   0.67645576
  0.25600000  -0.67645324
  0.25600000   0.67645575
  0.25600000  -0.67645324
  0.25600000   0.67645575
  0.25600000  -0.67645325
  0.25600000   0.67645575
  0.25600000  -0.67645325
  0.25600000   0.67645575
  0.25600000  -0.67645325
  0.25600000   0.67645574
  0.25600000  -0.67645325
  0.25600000   0.67645574
  0.25600000  -0.67645326
  0.25600000   0.67645574
  0.25600000  -0.67645326
  0.25600000   0.67645574
  0.25600000  -0.67645326
  0.25600000   0.67645573
  0.25600000  -0.67645326
  0.25600000   0.67645573
  0.25600000  -0.67645327
  0.25600000   0.67645573
  0.25600000  -0.67645327
  0.25600000   0.67645573
  0.25600000  -0.67645327
  0.25600000   0.67645572
  0.25600000  -0.67645327
  0.25600000   0.67645572
  0.25680000  -0.67628982
  0.25680000   0.67629235
  0.25680000  -0.67628982
  0.25680000   0.67629235
  0.25680000  -0.67628982
  0.25680000   0.67629235
  0.25680000  -0.67628982
  0.25680000   0.67629235
  0.25680000  -0.67628983
  0.25680000   0.67629234
  0.25680000  -0.67628983
  0.25680000   0.67629234
  0.25680000  -0.67628983
  0.25680000   0.67629234
  0.25680000  -0.67628983
  0.25680000   0.67629233
  0.25680000  -0.67628984
  0.25680000   0.67629233
  0.25680000  -0.67628984
  0.25680000   0.67629233
  0.25680000  -0.67628984
  0.25680000   0.67629233
  0.25680000  -0.67628984
  0.25680000   0.67629232
  0.25680000  -0.67628985
  0.25680000   0.67629232
  0.25680000  -0.67628985
  0.25680000   0.67629232
  0.25680000  -0.67628985
  0.25680000   0.67629232
  0.25680000  -0.67628985
  0.25680000   0.67629232
  0.25680000  -0.67628986
  0.25680000   0.67629231
  0.25680000  -0.67628986
  0.25680000   0.67629231
  0.25680000  -0.67628986
  0.25680000   0.67629231
  0.25680000  -0.67628986
  0.25680000   0.67629231
  0.25760000  -0.67612622
  0.25760000   0.67612875
  0.25760000  -0.67612622
  0.25760000   0.67612875
  0.25760000  -0.67612623
  0.25760000   0.67612874
  0.25760000  -0.67612623
  0.25760000   0.67612874
  0.25760000  -0.67612623
  0.25760000   0.67612874
  0.25760000  -0.67612623
  0.25760000   0.67612874
  0.25760000  -0.67612624
  0.25760000   0.67612873
  0.25760000  -0.67612624
  0.25760000   0.67612873
  0.25760000  -0.67612624
  0.25760000   0.67612873
  0.25760000  -0.67612624
  0.25760000   0.67612873
  0.25760000  -0.67612625
  0.25760000   0.67612872
  0.25760000  -0.67612625
  0.25760000   0.67612872
  0.25760000  -0.67612625
  0.25760000   0.67612872
  0.25760000  -0.67612625
  0.25760000   0.67612872
  0.25760000  -0.67612626
  0.25760000   0.67612871
  0.25760000  -0.67612626
  0.25760000   0.67612871
  0.25760000  -0.67612626
  0.25760000   0.67612871
  0.25760000  -0.67612626
  0.25760000   0.67612871
  0.25760000  -0.67612627
  0.25760000   0.67612870
  0.25760000  -0.67612627
  0.25760000   0.67612870
  0.25840000  -0.67596244
  0.25840000   0.67596496
  0.25840000  -0.67596244
  0.25840000   0.67596496
  0.25840000  -0.67596244
  0.25840000   0.67596495
  0.25840000  -0.67596244
  0.25840000   0.67596495
  0.25840000  -0.67596245
  0.25840000   0.67596495
  0.25840000  -0.67596245
  0.25840000   0.67596495
  0.25840000  -0.67596245
  0.25840000   0.67596494
  0.25840000  -0.67596245
  0.25840000   0.67596494
  0.25840000  -0.67596246
  0.25840000   0.67596494
  0.25840000  -0.67596246
  0.25840000   0.67596494
  0.25840000  -0.67596246
  0.25840000   0.67596493
  0.25840000  -0.67596246
  0.25840000   0.67596493
  0.25840000  -0.67596247
  0.25840000   0.67596493
  0.25840000  -0.67596247
  0.25840000   0.67596493
  0.25840000  -0.67596247
  0.25840000   0.67596492
  0.25840000  -0.67596247
  0.25840000   0.67596492
  0.25840000  -0.67596248
  0.25840000   0.67596492
  0.25840000  -0.67596248
  0.25840000   0.67596492
  0.25840000  -0.67596248
  0.25840000   0.67596491
  0.25840000  -0.67596248
  0.25840000   0.67596491
  0.25920000  -0.67579846
  0.25920000   0.67580098
  0.25920000  -0.67579847
  0.25920000   0.67580098
  0.25920000  -0.67579847
  0.25920000   0.67580097
  0.25920000  -0.67579847
  0.25920000   0.67580097
  0.25920000  -0.67579847
  0.25920000   0.67580097
  0.25920000  -0.67579848
  0.25920000   0.67580097
  0.25920000  -0.67579848
  0.25920000   0.67580096
  0.25920000  -0.67579848
  0.25920000   0.67580096
  0.25920000  -0.67579848
  0.25920000   0.67580096
  0.25920000  -0.67579849
  0.25920000   0.67580096
  0.25920000  -0.67579849
  0.25920000   0.67580095
  0.25920000  -0.67579849
  0.25920000   0.67580095
  0.25920000  -0.67579849
  0.25920000   0.67580095
  0.25920000  -0.67579850
  0.25920000   0.67580095
  0.25920000  -0.67579850
  0.25920000   0.67580094
  0.25920000  -0.67579850
  0.25920000   0.67580094
  0.25920000  -0.67579850
  0.25920000   0.67580094
  0.25920000  -0.67579851
  0.25920000   0.67580094
  0.25920000  -0.67579851
  0.25920000   0.67580093
  0.25920000  -0.67579851
  0.25920000   0.67580093
  0.26000000  -0.67563430
  0.26000000   0.67563681
  0.26000000  -0.67563430
  0.26000000   0.67563681
  0.26000000  -0.67563431
  0.26000000   0.67563681
  0.26000000  -0.67563431
  0.26000000   0.67563680
  0.26000000  -0.67563431
  0.26000000   0.67563680
  0.26000000  -0.67563431
  0.26000000   0.67563680
  0.26000000  -0.67563432
  0.26000000   0.67563679
  0.26000000  -0.67563432
  0.26000000   0.67563679
  0.26000000  -0.67563432
  0.26000000   0.67563679
  0.26000000  -0.67563432
  0.26000000   0.67563679
  0.26000000  -0.67563433
  0.26000000   0.67563679
  0.26000000  -0.67563433
  0.26000000   0.67563678
  0.26000000  -0.67563433
  0.26000000   0.67563678
  0.26000000  -0.67563433
  0.26000000   0.67563678
  0.26000000  -0.67563434
  0.26000000   0.67563678
  0.26000000  -0.67563434
  0.26000000   0.67563677
  0.26000000  -0.67563434
  0.26000000   0.67563677
  0.26000000  -0.67563434
  0.26000000   0.67563677
  0.26000000  -0.67563435
  0.26000000   0.67563677
  0.26000000  -0.67563435
  0.26000000   0.67563676
  0.26080000  -0.67546995
  0.26080000   0.67547245
  0.26080000  -0.67546995
  0.26080000   0.67547245
  0.26080000  -0.67546996
  0.26080000   0.67547245
  0.26080000  -0.67546996
  0.26080000   0.67547245
  0.26080000  -0.67546996
  0.26080000   0.67547244
  0.26080000  -0.67546996
  0.26080000   0.67547244
  0.26080000  -0.67546997
  0.26080000   0.67547244
  0.26080000  -0.67546997
  0.26080000   0.67547244
  0.26080000  -0.67546997
  0.26080000   0.67547243
  0.26080000  -0.67546997
  0.26080000   0.67547243
  0.26080000  -0.67546998
  0.26080000   0.67547243
  0.26080000  -0.67546998
  0.26080000   0.67547243
  0.26080000  -0.67546998
  0.26080000   0.67547242
  0.26080000  -0.67546998
  0.26080000   0.67547242
  0.26080000  -0.67546999
  0.26080000   0.67547242
  0.26080000  -0.67546999
  0.26080000   0.67547242
  0.26080000  -0.67546999
  0.26080000   0.67547241
  0.26080000  -0.67546999
  0.26080000   0.67547241
  0.26080000  -0.67547000
  0.26080000   0.67547241
  0.26080000  -0.67547000
  0.26080000   0.67547241
  0.26160000  -0.67530541
  0.26160000   0.67530791
  0.26160000  -0.67530541
  0.26160000   0.67530790
  0.26160000  -0.67530542
  0.26160000   0.67530790
  0.26160000  -0.67530542
  0.26160000   0.67530790
  0.26160000  -0.67530542
  0.26160000   0.67530790
  0.26160000  -0.67530542
  0.26160000   0.67530789
  0.26160000  -0.67530543
  0.26160000   0.67530789
  0.26160000  -0.67530543
  0.26160000   0.67530789
  0.26160000  -0.67530543
  0.26160000   0.67530789
  0.26160000  -0.67530543
  0.26160000   0.67530788
  0.26160000  -0.67530544
  0.26160000   0.67530788
  0.26160000  -0.67530544
  0.26160000   0.67530788
  0.26160000  -0.67530544
  0.26160000   0.67530788
  0.26160000  -0.67530544
  0.26160000   0.67530787
  0.26160000  -0.67530545
  0.26160000   0.67530787
  0.26160000  -0.67530545
  0.26160000   0.67530787
  0.26160000  -0.67530545
  0.26160000   0.67530787
  0.26160000  -0.67530545
  0.26160000   0.67530786
  0.26160000  -0.67530546
  0.26160000   0.67530786
  0.26160000  -0.67530546
  0.26160000   0.67530786
  0.26240000  -0.67514068
  0.26240000   0.67514317
  0.26240000  -0.67514068
  0.26240000   0.67514317
  0.26240000  -0.67514069
  0.26240000   0.67514316
  0.26240000  -0.67514069
  0.26240000   0.67514316
  0.26240000  -0.67514069
  0.26240000   0.67514316
  0.26240000  -0.67514069
  0.26240000   0.67514316
  0.26240000  -0.67514070
  0.26240000   0.67514315
  0.26240000  -0.67514070
  0.26240000   0.67514315
  0.26240000  -0.67514070
  0.26240000   0.67514315
  0.26240000  -0.67514070
  0.26240000   0.67514315
  0.26240000  -0.67514071
  0.26240000   0.67514315
  0.26240000  -0.67514071
  0.26240000   0.67514314
  0.26240000  -0.67514071
  0.26240000   0.67514314
  0.26240000  -0.67514071
  0.26240000   0.67514314
  0.26240000  -0.67514072
  0.26240000   0.67514314
  0.26240000  -0.67514072
  0.26240000   0.67514313
  0.26240000  -0.67514072
  0.26240000   0.67514313
  0.26240000  -0.67514072
  0.26240000   0.67514313
  0.26240000  -0.67514073
  0.26240000   0.67514313
  0.26240000  -0.67514073
  0.26240000   0.67514312
  0.26320000  -0.67497576
  0.26320000   0.67497824
  0.26320000  -0.67497576
  0.26320000   0.67497824
  0.26320000  -0.67497577
  0.26320000   0.67497824
  0.26320000  -0.67497577
  0.26320000   0.67497824
  0.26320000  -0.67497577
  0.26320000   0.67497823
  0.26320000  -0.67497577
  0.26320000   0.67497823
  0.26320000  -0.67497578
  0.26320000   0.67497823
  0.26320000  -0.67497578
  0.26320000   0.67497823
  0.26320000  -0.67497578
  0.26320000   0.67497822
  0.26320000  -0.67497578
  0.26320000   0.67497822
  0.26320000  -0.67497579
  0.26320000   0.67497822
  0.26320000  -0.67497579
  0.26320000   0.67497822
  0.26320000  -0.67497579
  0.26320000   0.67497821
  0.26320000  -0.67497579
  0.26320000   0.67497821
  0.26320000  -0.67497580
  0.26320000   0.67497821
  0.26320000  -0.67497580
  0.26320000   0.67497821
  0.26320000  -0.67497580
  0.26320000   0.67497820
  0.26320000  -0.67497580
  0.26320000   0.67497820
  0.26320000  -0.67497581
  0.26320000   0.67497820
  0.26320000  -0.67497581
  0.26320000   0.67497820
  0.26400000  -0.67481065
  0.26400000   0.67481313
  0.26400000  -0.67481065
  0.26400000   0.67481312
  0.26400000  -0.67481066
  0.26400000   0.67481312
  0.26400000  -0.67481066
  0.26400000   0.67481312
  0.26400000  -0.67481066
  0.26400000   0.67481312
  0.26400000  -0.67481066
  0.26400000   0.67481311
  0.26400000  -0.67481067
  0.26400000   0.67481311
  0.26400000  -0.67481067
  0.26400000   0.67481311
  0.26400000  -0.67481067
  0.26400000   0.67481311
  0.26400000  -0.67481067
  0.26400000   0.67481310
  0.26400000  -0.67481068
  0.26400000   0.67481310
  0.26400000  -0.67481068
  0.26400000   0.67481310
  0.26400000  -0.67481068
  0.26400000   0.67481310
  0.26400000  -0.67481068
  0.26400000   0.67481310
  0.26400000  -0.67481069
  0.26400000   0.67481309
  0.26400000  -0.67481069
  0.26400000   0.67481309
  0.26400000  -0.67481069
  0.26400000   0.67481309
  0.26400000  -0.67481069
  0.26400000   0.67481309
  0.26400000  -0.67481070
  0.26400000   0.67481308
  0.26400000  -0.67481070
  0.26400000   0.67481308
  0.26480000  -0.67464535
  0.26480000   0.67464782
  0.26480000  -0.67464535
  0.26480000   0.67464782
  0.26480000  -0.67464536
  0.26480000   0.67464781
  0.26480000  -0.67464536
  0.26480000   0.67464781
  0.26480000  -0.67464536
  0.26480000   0.67464781
  0.26480000  -0.67464536
  0.26480000   0.67464781
  0.26480000  -0.67464537
  0.26480000   0.67464780
  0.26480000  -0.67464537
  0.26480000   0.67464780
  0.26480000  -0.67464537
  0.26480000   0.67464780
  0.26480000  -0.67464537
  0.26480000   0.67464780
  0.26480000  -0.67464538
  0.26480000   0.67464780
  0.26480000  -0.67464538
  0.26480000   0.67464779
  0.26480000  -0.67464538
  0.26480000   0.67464779
  0.26480000  -0.67464538
  0.26480000   0.67464779
  0.26480000  -0.67464539
  0.26480000   0.67464779
  0.26480000  -0.67464539
  0.26480000   0.67464778
  0.26480000  -0.67464539
  0.26480000   0.67464778
  0.26480000  -0.67464539
  0.26480000   0.67464778
  0.26480000  -0.67464540
  0.26480000   0.67464778
  0.26480000  -0.67464540
  0.26480000   0.67464777
  0.26560000  -0.67447986
  0.26560000   0.67448232
  0.26560000  -0.67447986
  0.26560000   0.67448232
  0.26560000  -0.67447987
  0.26560000   0.67448232
  0.26560000  -0.67447987
  0.26560000   0.67448231
  0.26560000  -0.67447987
  0.26560000   0.67448231
  0.26560000  -0.67447987
  0.26560000   0.67448231
  0.26560000  -0.67447988
  0.26560000   0.67448231
  0.26560000  -0.67447988
  0.26560000   0.67448230
  0.26560000  -0.67447988
  0.26560000   0.67448230
  0.26560000  -0.67447988
  0.26560000   0.67448230
  0.26560000  -0.67447988
  0.26560000   0.67448230
  0.26560000  -0.67447989
  0.26560000   0.67448229
  0.26560000  -0.67447989
  0.26560000   0.67448229
  0.26560000  -0.67447989
  0.26560000   0.67448229
  0.26560000  -0.67447989
  0.26560000   0.67448229
  0.26560000  -0.67447990
  0.26560000   0.67448228
  0.26560000  -0.67447990
  0.26560000   0.67448228
  0.26560000  -0.67447990
  0.26560000   0.67448228
  0.26560000  -0.67447990
  0.26560000   0.67448228
  0.26560000  -0.67447991
  0.26560000   0.67448228
  0.26640000  -0.67431418
  0.26640000   0.67431663
  0.26640000  -0.67431418
  0.26640000   0.67431663
  0.26640000  -0.67431418
  0.26640000   0.67431663
  0.26640000  -0.67431418
  0.26640000   0.67431662
  0.26640000  -0.67431419
  0.26640000   0.67431662
  0.26640000  -0.67431419
  0.26640000   0.67431662
  0.26640000  -0.67431419
  0.26640000   0.67431662
  0.26640000  -0.67431419
  0.26640000   0.67431661
  0.26640000  -0.67431420
  0.26640000   0.67431661
  0.26640000  -0.67431420
  0.26640000   0.67431661
  0.26640000  -0.67431420
  0.26640000   0.67431661
  0.26640000  -0.67431420
  0.26640000   0.67431660
  0.26640000  -0.67431421
  0.26640000   0.67431660
  0.26640000  -0.67431421
  0.26640000   0.67431660
  0.26640000  -0.67431421
  0.26640000   0.67431660
  0.26640000  -0.67431421
  0.26640000   0.67431660
  0.26640000  -0.67431422
  0.26640000   0.67431659
  0.26640000  -0.67431422
  0.26640000   0.67431659
  0.26640000  -0.67431422
  0.26640000   0.67431659
  0.26640000  -0.67431422
  0.26640000   0.67431659
  0.26720000  -0.67414830
  0.26720000   0.67415075
  0.26720000  -0.67414830
  0.26720000   0.67415075
  0.26720000  -0.67414831
  0.26720000   0.67415075
  0.26720000  -0.67414831
  0.26720000   0.67415074
  0.26720000  -0.67414831
  0.26720000   0.67415074
  0.26720000  -0.67414831
  0.26720000   0.67415074
  0.26720000  -0.67414832
  0.26720000   0.67415074
  0.26720000  -0.67414832
  0.26720000   0.67415073
  0.26720000  -0.67414832
  0.26720000   0.67415073
  0.26720000  -0.67414832
  0.26720000   0.67415073
  0.26720000  -0.67414833
  0.26720000   0.67415073
  0.26720000  -0.67414833
  0.26720000   0.67415072
  0.26720000  -0.67414833
  0.26720000   0.67415072
  0.26720000  -0.67414833
  0.26720000   0.67415072
  0.26720000  -0.67414834
  0.26720000   0.67415072
  0.26720000  -0.67414834
  0.26720000   0.67415071
  0.26720000  -0.67414834
  0.26720000   0.67415071
  0.26720000  -0.67414834
  0.26720000   0.67415071
  0.26720000  -0.67414835
  0.26720000   0.67415071
  0.26720000  -0.67414835
  0.26720000   0.67415070
  0.26800000  -0.67398224
  0.26800000   0.67398468
  0.26800000  -0.67398224
  0.26800000   0.67398467
  0.26800000  -0.67398224
  0.26800000   0.67398467
  0.26800000  -0.67398224
  0.26800000   0.67398467
  0.26800000  -0.67398225
  0.26800000   0.67398467
  0.26800000  -0.67398225
  0.26800000   0.67398466
  0.26800000  -0.67398225
  0.26800000   0.67398466
  0.26800000  -0.67398225
  0.26800000   0.67398466
  0.26800000  -0.67398226
  0.26800000   0.67398466
  0.26800000  -0.67398226
  0.26800000   0.67398465
  0.26800000  -0.67398226
  0.26800000   0.67398465
  0.26800000  -0.67398226
  0.26800000   0.67398465
  0.26800000  -0.67398226
  0.26800000   0.67398465
  0.26800000  -0.67398227
  0.26800000   0.67398464
  0.26800000  -0.67398227
  0.26800000   0.67398464
  0.26800000  -0.67398227
  0.26800000   0.67398464
  0.26800000  -0.67398227
  0.26800000   0.67398464
  0.26800000  -0.67398228
  0.26800000   0.67398464
  0.26800000  -0.67398228
  0.26800000   0.67398463
  0.26800000  -0.67398228
  0.26800000   0.67398463
  0.26880000  -0.67381598
  0.26880000   0.67381841
  0.26880000  -0.67381598
  0.26880000   0.67381841
  0.26880000  -0.67381598
  0.26880000   0.67381841
  0.26880000  -0.67381598
  0.26880000   0.67381840
  0.26880000  -0.67381599
  0.26880000   0.67381840
  0.26880000  -0.67381599
  0.26880000   0.67381840
  0.26880000  -0.67381599
  0.26880000   0.67381840
  0.26880000  -0.67381599
  0.26880000   0.67381839
  0.26880000  -0.67381600
  0.26880000   0.67381839
  0.26880000  -0.67381600
  0.26880000   0.67381839
  0.26880000  -0.67381600
  0.26880000   0.67381839
  0.26880000  -0.67381600
  0.26880000   0.67381838
  0.26880000  -0.67381601
  0.26880000   0.67381838
  0.26880000  -0.67381601
  0.26880000   0.67381838
  0.26880000  -0.67381601
  0.26880000   0.67381838
  0.26880000  -0.67381601
  0.26880000   0.67381837
  0.26880000  -0.67381601
  0.26880000   0.67381837
  0.26880000  -0.67381602
  0.26880000   0.67381837
  0.26880000  -0.67381602
  0.26880000   0.67381837
  0.26880000  -0.67381602
  0.26880000   0.67381836
  0.26960000  -0.67364952
  0.26960000   0.67365195
  0.26960000  -0.67364953
  0.26960000   0.67365195
  0.26960000  -0.67364953
  0.26960000   0.67365195
  0.26960000  -0.67364953
  0.26960000   0.67365194
  0.26960000  -0.67364953
  0.26960000   0.67365194
  0.26960000  -0.67364954
  0.26960000   0.67365194
  0.26960000  -0.67364954
  0.26960000   0.67365194
  0.26960000  -0.67364954
  0.26960000   0.67365193
  0.26960000  -0.67364954
  0.26960000   0.67365193
  0.26960000  -0.67364955
  0.26960000   0.67365193
  0.26960000  -0.67364955
  0.26960000   0.67365193
  0.26960000  -0.67364955
  0.26960000   0.67365193
  0.26960000  -0.67364955
  0.26960000   0.67365192
  0.26960000  -0.67364956
  0.26960000   0.67365192
  0.26960000  -0.67364956
  0.26960000   0.67365192
  0.26960000  -0.67364956
  0.26960000   0.67365192
  0.26960000  -0.67364956
  0.26960000   0.67365191
  0.26960000  -0.67364957
  0.26960000   0.67365191
  0.26960000  -0.67364957
  0.26960000   0.67365191
  0.26960000  -0.67364957
  0.26960000   0.67365191
  0.27040000  -0.67348288
  0.27040000   0.67348530
  0.27040000  -0.67348288
  0.27040000   0.67348530
  0.27040000  -0.67348288
  0.27040000   0.67348529
  0.27040000  -0.67348289
  0.27040000   0.67348529
  0.27040000  -0.67348289
  0.27040000   0.67348529
  0.27040000  -0.67348289
  0.27040000   0.67348529
  0.27040000  -0.67348289
  0.27040000   0.67348529
  0.27040000  -0.67348290
  0.27040000   0.67348528
  0.27040000  -0.67348290
  0.27040000   0.67348528
  0.27040000  -0.67348290
  0.27040000   0.67348528
  0.27040000  -0.67348290
  0.27040000   0.67348528
  0.27040000  -0.67348291
  0.27040000   0.67348527
  0.27040000  -0.67348291
  0.27040000   0.67348527
  0.27040000  -0.67348291
  0.27040000   0.67348527
  0.27040000  -0.67348291
  0.27040000   0.67348527
  0.27040000  -0.67348292
  0.27040000   0.67348526
  0.27040000  -0.67348292
  0.27040000   0.67348526
  0.27040000  -0.67348292
  0.27040000   0.67348526
  0.27040000  -0.67348292
  0.27040000   0.67348526
  0.27040000  -0.67348292
  0.27040000   0.67348525
  0.27120000  -0.67331604
  0.27120000   0.67331845
  0.27120000  -0.67331604
  0.27120000   0.67331845
  0.27120000  -0.67331605
  0.27120000   0.67331845
  0.27120000  -0.67331605
  0.27120000   0.67331845
  0.27120000  -0.67331605
  0.27120000   0.67331844
  0.27120000  -0.67331605
  0.27120000   0.67331844
  0.27120000  -0.67331605
  0.27120000   0.67331844
  0.27120000  -0.67331606
  0.27120000   0.67331844
  0.27120000  -0.67331606
  0.27120000   0.67331843
  0.27120000  -0.67331606
  0.27120000   0.67331843
  0.27120000  -0.67331606
  0.27120000   0.67331843
  0.27120000  -0.67331607
  0.27120000   0.67331843
  0.27120000  -0.67331607
  0.27120000   0.67331843
  0.27120000  -0.67331607
  0.27120000   0.67331842
  0.27120000  -0.67331607
  0.27120000   0.67331842
  0.27120000  -0.67331608
  0.27120000   0.67331842
  0.27120000  -0.67331608
  0.27120000   0.67331842
  0.27120000  -0.67331608
  0.27120000   0.67331841
  0.27120000  -0.67331608
  0.27120000   0.67331841
  0.27120000  -0.67331609
  0.27120000   0.67331841
  0.27200000  -0.67314901
  0.27200000   0.67315142
  0.27200000  -0.67314901
  0.27200000   0.67315141
  0.27200000  -0.67314901
  0.27200000   0.67315141
  0.27200000  -0.67314902
  0.27200000   0.67315141
  0.27200000  -0.67314902
  0.27200000   0.67315141
  0.27200000  -0.67314902
  0.27200000   0.67315140
  0.27200000  -0.67314902
  0.27200000   0.67315140
  0.27200000  -0.67314902
  0.27200000   0.67315140
  0.27200000  -0.67314903
  0.27200000   0.67315140
  0.27200000  -0.67314903
  0.27200000   0.67315139
  0.27200000  -0.67314903
  0.27200000   0.67315139
  0.27200000  -0.67314903
  0.27200000   0.67315139
  0.27200000  -0.67314904
  0.27200000   0.67315139
  0.27200000  -0.67314904
  0.27200000   0.67315138
  0.27200000  -0.67314904
  0.27200000   0.67315138
  0.27200000  -0.67314904
  0.27200000   0.67315138
  0.27200000  -0.67314905
  0.27200000   0.67315138
  0.27200000  -0.67314905
  0.27200000   0.67315137
  0.27200000  -0.67314905
  0.27200000   0.67315137
  0.27200000  -0.67314905
  0.27200000   0.67315137
  0.27280000  -0.67298178
  0.27280000   0.67298418
  0.27280000  -0.67298178
  0.27280000   0.67298418
  0.27280000  -0.67298179
  0.27280000   0.67298418
  0.27280000  -0.67298179
  0.27280000   0.67298417
  0.27280000  -0.67298179
  0.27280000   0.67298417
  0.27280000  -0.67298179
  0.27280000   0.67298417
  0.27280000  -0.67298180
  0.27280000   0.67298417
  0.27280000  -0.67298180
  0.27280000   0.67298416
  0.27280000  -0.67298180
  0.27280000   0.67298416
  0.27280000  -0.67298180
  0.27280000   0.67298416
  0.27280000  -0.67298181
  0.27280000   0.67298416
  0.27280000  -0.67298181
  0.27280000   0.67298416
  0.27280000  -0.67298181
  0.27280000   0.67298415
  0.27280000  -0.67298181
  0.27280000   0.67298415
  0.27280000  -0.67298181
  0.27280000   0.67298415
  0.27280000  -0.67298182
  0.27280000   0.67298415
  0.27280000  -0.67298182
  0.27280000   0.67298414
  0.27280000  -0.67298182
  0.27280000   0.67298414
  0.27280000  -0.67298182
  0.27280000   0.67298414
  0.27280000  -0.67298183
  0.27280000   0.67298414
  0.27360000  -0.67281436
  0.27360000   0.67281675
  0.27360000  -0.67281436
  0.27360000   0.67281675
  0.27360000  -0.67281436
  0.27360000   0.67281675
  0.27360000  -0.67281437
  0.27360000   0.67281675
  0.27360000  -0.67281437
  0.27360000   0.67281674
  0.27360000  -0.67281437
  0.27360000   0.67281674
  0.27360000  -0.67281437
  0.27360000   0.67281674
  0.27360000  -0.67281438
  0.27360000   0.67281674
  0.27360000  -0.67281438
  0.27360000   0.67281673
  0.27360000  -0.67281438
  0.27360000   0.67281673
  0.27360000  -0.67281438
  0.27360000   0.67281673
  0.27360000  -0.67281439
  0.27360000   0.67281673
  0.27360000  -0.67281439
  0.27360000   0.67281672
  0.27360000  -0.67281439
  0.27360000   0.67281672
  0.27360000  -0.67281439
  0.27360000   0.67281672
  0.27360000  -0.67281440
  0.27360000   0.67281672
  0.27360000  -0.67281440
  0.27360000   0.67281672
  0.27360000  -0.67281440
  0.27360000   0.67281671
  0.27360000  -0.67281440
  0.27360000   0.67281671
  0.27360000  -0.67281440
  0.27360000   0.67281671
  0.27440000  -0.67264674
  0.27440000   0.67264913
  0.27440000  -0.67264675
  0.27440000   0.67264913
  0.27440000  -0.67264675
  0.27440000   0.67264913
  0.27440000  -0.67264675
  0.27440000   0.67264912
  0.27440000  -0.67264675
  0.27440000   0.67264912
  0.27440000  -0.67264676
  0.27440000   0.67264912
  0.27440000  -0.67264676
  0.27440000   0.67264912
  0.27440000  -0.67264676
  0.27440000   0.67264911
  0.27440000  -0.67264676
  0.27440000   0.67264911
  0.27440000  -0.67264677
  0.27440000   0.67264911
  0.27440000  -0.67264677
  0.27440000   0.67264911
  0.27440000  -0.67264677
  0.27440000   0.67264910
  0.27440000  -0.67264677
  0.27440000   0.67264910
  0.27440000  -0.67264677
  0.27440000   0.67264910
  0.27440000  -0.67264678
  0.27440000   0.67264910
  0.27440000  -0.67264678
  0.27440000   0.67264910
  0.27440000  -0.67264678
  0.27440000   0.67264909
  0.27440000  -0.67264678
  0.27440000   0.67264909
  0.27440000  -0.67264679
  0.27440000   0.67264909
  0.27440000  -0.67264679
  0.27440000   0.67264909
  0.27520000  -0.67247893
  0.27520000   0.67248131
  0.27520000  -0.67247893
  0.27520000   0.67248131
  0.27520000  -0.67247894
  0.27520000   0.67248131
  0.27520000  -0.67247894
  0.27520000   0.67248131
  0.27520000  -0.67247894
  0.27520000   0.67248130
  0.27520000  -0.67247894
  0.27520000   0.67248130
  0.27520000  -0.67247895
  0.27520000   0.67248130
  0.27520000  -0.67247895
  0.27520000   0.67248130
  0.27520000  -0.67247895
  0.27520000   0.67248129
  0.27520000  -0.67247895
  0.27520000   0.67248129
  0.27520000  -0.67247896
  0.27520000   0.67248129
  0.27520000  -0.67247896
  0.27520000   0.67248129
  0.27520000  -0.67247896
  0.27520000   0.67248128
  0.27520000  -0.67247896
  0.27520000   0.67248128
  0.27520000  -0.67247897
  0.27520000   0.67248128
  0.27520000  -0.67247897
  0.27520000   0.67248128
  0.27520000  -0.67247897
  0.27520000   0.67248127
  0.27520000  -0.67247897
  0.27520000   0.67248127
  0.27520000  -0.67247897
  0.27520000   0.67248127
  0.27520000  -0.67247898
  0.27520000   0.67248127
  0.27600000  -0.67231092
  0.27600000   0.67231330
  0.27600000  -0.67231093
  0.27600000   0.67231330
  0.27600000  -0.67231093
  0.27600000   0.67231329
  0.27600000  -0.67231093
  0.27600000   0.67231329
  0.27600000  -0.67231093
  0.27600000   0.67231329
  0.27600000  -0.67231094
  0.27600000   0.67231329
  0.27600000  -0.67231094
  0.27600000   0.67231328
  0.27600000  -0.67231094
  0.27600000   0.67231328
  0.27600000  -0.67231094
  0.27600000   0.67231328
  0.27600000  -0.67231095
  0.27600000   0.67231328
  0.27600000  -0.67231095
  0.27600000   0.67231327
  0.27600000  -0.67231095
  0.27600000   0.67231327
  0.27600000  -0.67231095
  0.27600000   0.67231327
  0.27600000  -0.67231096
  0.27600000   0.67231327
  0.27600000  -0.67231096
  0.27600000   0.67231327
  0.27600000  -0.67231096
  0.27600000   0.67231326
  0.27600000  -0.67231096
  0.27600000   0.67231326
  0.27600000  -0.67231096
  0.27600000   0.67231326
  0.27600000  -0.67231097
  0.27600000   0.67231326
  0.27600000  -0.67231097
  0.27600000   0.67231325
  0.27680000  -0.67214272
  0.27680000   0.67214509
  0.27680000  -0.67214272
  0.27680000   0.67214509
  0.27680000  -0.67214273
  0.27680000   0.67214508
  0.27680000  -0.67214273
  0.27680000   0.67214508
  0.27680000  -0.67214273
  0.27680000   0.67214508
  0.27680000  -0.67214273
  0.27680000   0.67214508
  0.27680000  -0.67214274
  0.27680000   0.67214507
  0.27680000  -0.67214274
  0.27680000   0.67214507
  0.27680000  -0.67214274
  0.27680000   0.67214507
  0.27680000  -0.67214274
  0.27680000   0.67214507
  0.27680000  -0.67214275
  0.27680000   0.67214507
  0.27680000  -0.67214275
  0.27680000   0.67214506
  0.27680000  -0.67214275
  0.27680000   0.67214506
  0.27680000  -0.67214275
  0.27680000   0.67214506
  0.27680000  -0.67214275
  0.27680000   0.67214506
  0.27680000  -0.67214276
  0.27680000   0.67214505
  0.27680000  -0.67214276
  0.27680000   0.67214505
  0.27680000  -0.67214276
  0.27680000   0.67214505
  0.27680000  -0.67214276
  0.27680000   0.67214505
  0.27680000  -0.67214277
  0.27680000   0.67214504
  0.27760000  -0.67197432
  0.27760000   0.67197668
  0.27760000  -0.67197432
  0.27760000   0.67197668
  0.27760000  -0.67197433
  0.27760000   0.67197668
  0.27760000  -0.67197433
  0.27760000   0.67197668
  0.27760000  -0.67197433
  0.27760000   0.67197667
  0.27760000  -0.67197433
  0.27760000   0.67197667
  0.27760000  -0.67197434
  0.27760000   0.67197667
  0.27760000  -0.67197434
  0.27760000   0.67197667
  0.27760000  -0.67197434
  0.27760000   0.67197666
  0.27760000  -0.67197434
  0.27760000   0.67197666
  0.27760000  -0.67197435
  0.27760000   0.67197666
  0.27760000  -0.67197435
  0.27760000   0.67197666
  0.27760000  -0.67197435
  0.27760000   0.67197665
  0.27760000  -0.67197435
  0.27760000   0.67197665
  0.27760000  -0.67197436
  0.27760000   0.67197665
  0.27760000  -0.67197436
  0.27760000   0.67197665
  0.27760000  -0.67197436
  0.27760000   0.67197665
  0.27760000  -0.67197436
  0.27760000   0.67197664
  0.27760000  -0.67197436
  0.27760000   0.67197664
  0.27760000  -0.67197437
  0.27760000   0.67197664
  0.27840000  -0.67180573
  0.27840000   0.67180808
  0.27840000  -0.67180573
  0.27840000   0.67180808
  0.27840000  -0.67180573
  0.27840000   0.67180808
  0.27840000  -0.67180573
  0.27840000   0.67180807
  0.27840000  -0.67180574
  0.27840000   0.67180807
  0.27840000  -0.67180574
  0.27840000   0.67180807
  0.27840000  -0.67180574
  0.27840000   0.67180807
  0.27840000  -0.67180574
  0.27840000   0.67180806
  0.27840000  -0.67180575
  0.27840000   0.67180806
  0.27840000  -0.67180575
  0.27840000   0.67180806
  0.27840000  -0.67180575
  0.27840000   0.67180806
  0.27840000  -0.67180575
  0.27840000   0.67180805
  0.27840000  -0.67180575
  0.27840000   0.67180805
  0.27840000  -0.67180576
  0.27840000   0.67180805
  0.27840000  -0.67180576
  0.27840000   0.67180805
  0.27840000  -0.67180576
  0.27840000   0.67180805
  0.27840000  -0.67180576
  0.27840000   0.67180804
  0.27840000  -0.67180577
  0.27840000   0.67180804
  0.27840000  -0.67180577
  0.27840000   0.67180804
  0.27840000  -0.67180577
  0.27840000   0.67180804
  0.27920000  -0.67163693
  0.27920000   0.67163928
  0.27920000  -0.67163694
  0.27920000   0.67163928
  0.27920000  -0.67163694
  0.27920000   0.67163928
  0.27920000  -0.67163694
  0.27920000   0.67163927
  0.27920000  -0.67163694
  0.27920000   0.67163927
  0.27920000  -0.67163694
  0.27920000   0.67163927
  0.27920000  -0.67163695
  0.27920000   0.67163927
  0.27920000  -0.67163695
  0.27920000   0.67163926
  0.27920000  -0.67163695
  0.27920000   0.67163926
  0.27920000  -0.67163695
  0.27920000   0.67163926
  0.27920000  -0.67163696
  0.27920000   0.67163926
  0.27920000  -0.67163696
  0.27920000   0.67163925
  0.27920000  -0.67163696
  0.27920000   0.67163925
  0.27920000  -0.67163696
  0.27920000   0.67163925
  0.27920000  -0.67163697
  0.27920000   0.67163925
  0.27920000  -0.67163697
  0.27920000   0.67163925
  0.27920000  -0.67163697
  0.27920000   0.67163924
  0.27920000  -0.67163697
  0.27920000   0.67163924
  0.27920000  -0.67163697
  0.27920000   0.67163924
  0.27920000  -0.67163698
  0.27920000   0.67163924
  0.28000000  -0.67146794
  0.28000000   0.67147028
  0.28000000  -0.67146794
  0.28000000   0.67147028
  0.28000000  -0.67146795
  0.28000000   0.67147028
  0.28000000  -0.67146795
  0.28000000   0.67147028
  0.28000000  -0.67146795
  0.28000000   0.67147027
  0.28000000  -0.67146795
  0.28000000   0.67147027
  0.28000000  -0.67146796
  0.28000000   0.67147027
  0.28000000  -0.67146796
  0.28000000   0.67147027
  0.28000000  -0.67146796
  0.28000000   0.67147026
  0.28000000  -0.67146796
  0.28000000   0.67147026
  0.28000000  -0.67146797
  0.28000000   0.67147026
  0.28000000  -0.67146797
  0.28000000   0.67147026
  0.28000000  -0.67146797
  0.28000000   0.67147026
  0.28000000  -0.67146797
  0.28000000   0.67147025
  0.28000000  -0.67146797
  0.28000000   0.67147025
  0.28000000  -0.67146798
  0.28000000   0.67147025
  0.28000000  -0.67146798
  0.28000000   0.67147025
  0.28000000  -0.67146798
  0.28000000   0.67147024
  0.28000000  -0.67146798
  0.28000000   0.67147024
  0.28000000  -0.67146799
  0.28000000   0.67147024
  0.28080000  -0.67129875
  0.28080000   0.67130109
  0.28080000  -0.67129876
  0.28080000   0.67130109
  0.28080000  -0.67129876
  0.28080000   0.67130108
  0.28080000  -0.67129876
  0.28080000   0.67130108
  0.28080000  -0.67129876
  0.28080000   0.67130108
  0.28080000  -0.67129877
  0.28080000   0.67130108
  0.28080000  -0.67129877
  0.28080000   0.67130107
  0.28080000  -0.67129877
  0.28080000   0.67130107
  0.28080000  -0.67129877
  0.28080000   0.67130107
  0.28080000  -0.67129878
  0.28080000   0.67130107
  0.28080000  -0.67129878
  0.28080000   0.67130106
  0.28080000  -0.67129878
  0.28080000   0.67130106
  0.28080000  -0.67129878
  0.28080000   0.67130106
  0.28080000  -0.67129878
  0.28080000   0.67130106
  0.28080000  -0.67129879
  0.28080000   0.67130106
  0.28080000  -0.67129879
  0.28080000   0.67130105
  0.28080000  -0.67129879
  0.28080000   0.67130105
  0.28080000  -0.67129879
  0.28080000   0.67130105
  0.28080000  -0.67129880
  0.28080000   0.67130105
  0.28080000  -0.67129880
  0.28080000   0.67130104
  0.28160000  -0.67112937
  0.28160000   0.67113169
  0.28160000  -0.67112937
  0.28160000   0.67113169
  0.28160000  -0.67112937
  0.28160000   0.67113169
  0.28160000  -0.67112937
  0.28160000   0.67113169
  0.28160000  -0.67112938
  0.28160000   0.67113169
  0.28160000  -0.67112938
  0.28160000   0.67113168
  0.28160000  -0.67112938
  0.28160000   0.67113168
  0.28160000  -0.67112938
  0.28160000   0.67113168
  0.28160000  -0.67112939
  0.28160000   0.67113168
  0.28160000  -0.67112939
  0.28160000   0.67113167
  0.28160000  -0.67112939
  0.28160000   0.67113167
  0.28160000  -0.67112939
  0.28160000   0.67113167
  0.28160000  -0.67112940
  0.28160000   0.67113167
  0.28160000  -0.67112940
  0.28160000   0.67113166
  0.28160000  -0.67112940
  0.28160000   0.67113166
  0.28160000  -0.67112940
  0.28160000   0.67113166
  0.28160000  -0.67112940
  0.28160000   0.67113166
  0.28160000  -0.67112941
  0.28160000   0.67113166
  0.28160000  -0.67112941
  0.28160000   0.67113165
  0.28160000  -0.67112941
  0.28160000   0.67113165
  0.28240000  -0.67095978
  0.28240000   0.67096210
  0.28240000  -0.67095978
  0.28240000   0.67096210
  0.28240000  -0.67095979
  0.28240000   0.67096210
  0.28240000  -0.67095979
  0.28240000   0.67096210
  0.28240000  -0.67095979
  0.28240000   0.67096209
  0.28240000  -0.67095979
  0.28240000   0.67096209
  0.28240000  -0.67095980
  0.28240000   0.67096209
  0.28240000  -0.67095980
  0.28240000   0.67096209
  0.28240000  -0.67095980
  0.28240000   0.67096208
  0.28240000  -0.67095980
  0.28240000   0.67096208
  0.28240000  -0.67095981
  0.28240000   0.67096208
  0.28240000  -0.67095981
  0.28240000   0.67096208
  0.28240000  -0.67095981
  0.28240000   0.67096208
  0.28240000  -0.67095981
  0.28240000   0.67096207
  0.28240000  -0.67095981
  0.28240000   0.67096207
  0.28240000  -0.67095982
  0.28240000   0.67096207
  0.28240000  -0.67095982
  0.28240000   0.67096207
  0.28240000  -0.67095982
  0.28240000   0.67096206
  0.28240000  -0.67095982
  0.28240000   0.67096206
  0.28240000  -0.67095983
  0.28240000   0.67096206
  0.28320000  -0.67079000
  0.28320000   0.67079231
  0.28320000  -0.67079000
  0.28320000   0.67079231
  0.28320000  -0.67079000
  0.28320000   0.67079231
  0.28320000  -0.67079001
  0.28320000   0.67079231
  0.28320000  -0.67079001
  0.28320000   0.67079230
  0.28320000  -0.67079001
  0.28320000   0.67079230
  0.28320000  -0.67079001
  0.28320000   0.67079230
  0.28320000  -0.67079001
  0.28320000   0.67079230
  0.28320000  -0.67079002
  0.28320000   0.67079229
  0.28320000  -0.67079002
  0.28320000   0.67079229
  0.28320000  -0.67079002
  0.28320000   0.67079229
  0.28320000  -0.67079002
  0.28320000   0.67079229
  0.28320000  -0.67079003
  0.28320000   0.67079228
  0.28320000  -0.67079003
  0.28320000   0.67079228
  0.28320000  -0.67079003
  0.28320000   0.67079228
  0.28320000  -0.67079003
  0.28320000   0.67079228
  0.28320000  -0.67079004
  0.28320000   0.67079228
  0.28320000  -0.67079004
  0.28320000   0.67079227
  0.28320000  -0.67079004
  0.28320000   0.67079227
  0.28320000  -0.67079004
  0.28320000   0.67079227
  0.28400000  -0.67062002
  0.28400000   0.67062232
  0.28400000  -0.67062002
  0.28400000   0.67062232
  0.28400000  -0.67062002
  0.28400000   0.67062232
  0.28400000  -0.67062002
  0.28400000   0.67062232
  0.28400000  -0.67062002
  0.28400000   0.67062231
  0.28400000  -0.67062003
  0.28400000   0.67062231
  0.28400000  -0.67062003
  0.28400000   0.67062231
  0.28400000  -0.67062003
  0.28400000   0.67062231
  0.28400000  -0.67062003
  0.28400000   0.67062230
  0.28400000  -0.67062004
  0.28400000   0.67062230
  0.28400000  -0.67062004
  0.28400000   0.67062230
  0.28400000  -0.67062004
  0.28400000   0.67062230
  0.28400000  -0.67062004
  0.28400000   0.67062230
  0.28400000  -0.67062005
  0.28400000   0.67062229
  0.28400000  -0.67062005
  0.28400000   0.67062229
  0.28400000  -0.67062005
  0.28400000   0.67062229
  0.28400000  -0.67062005
  0.28400000   0.67062229
  0.28400000  -0.67062005
  0.28400000   0.67062228
  0.28400000  -0.67062006
  0.28400000   0.67062228
  0.28400000  -0.67062006
  0.28400000   0.67062228
  0.28480000  -0.67044983
  0.28480000   0.67045213
  0.28480000  -0.67044983
  0.28480000   0.67045213
  0.28480000  -0.67044984
  0.28480000   0.67045213
  0.28480000  -0.67044984
  0.28480000   0.67045213
  0.28480000  -0.67044984
  0.28480000   0.67045212
  0.28480000  -0.67044984
  0.28480000   0.67045212
  0.28480000  -0.67044985
  0.28480000   0.67045212
  0.28480000  -0.67044985
  0.28480000   0.67045212
  0.28480000  -0.67044985
  0.28480000   0.67045211
  0.28480000  -0.67044985
  0.28480000   0.67045211
  0.28480000  -0.67044986
  0.28480000   0.67045211
  0.28480000  -0.67044986
  0.28480000   0.67045211
  0.28480000  -0.67044986
  0.28480000   0.67045211
  0.28480000  -0.67044986
  0.28480000   0.67045210
  0.28480000  -0.67044986
  0.28480000   0.67045210
  0.28480000  -0.67044987
  0.28480000   0.67045210
  0.28480000  -0.67044987
  0.28480000   0.67045210
  0.28480000  -0.67044987
  0.28480000   0.67045209
  0.28480000  -0.67044987
  0.28480000   0.67045209
  0.28480000  -0.67044988
  0.28480000   0.67045209
  0.28560000  -0.67027945
  0.28560000   0.67028174
  0.28560000  -0.67027945
  0.28560000   0.67028174
  0.28560000  -0.67027945
  0.28560000   0.67028174
  0.28560000  -0.67027946
  0.28560000   0.67028174
  0.28560000  -0.67027946
  0.28560000   0.67028173
  0.28560000  -0.67027946
  0.28560000   0.67028173
  0.28560000  -0.67027946
  0.28560000   0.67028173
  0.28560000  -0.67027947
  0.28560000   0.67028173
  0.28560000  -0.67027947
  0.28560000   0.67028173
  0.28560000  -0.67027947
  0.28560000   0.67028172
  0.28560000  -0.67027947
  0.28560000   0.67028172
  0.28560000  -0.67027947
  0.28560000   0.67028172
  0.28560000  -0.67027948
  0.28560000   0.67028172
  0.28560000  -0.67027948
  0.28560000   0.67028171
  0.28560000  -0.67027948
  0.28560000   0.67028171
  0.28560000  -0.67027948
  0.28560000   0.67028171
  0.28560000  -0.67027949
  0.28560000   0.67028171
  0.28560000  -0.67027949
  0.28560000   0.67028171
  0.28560000  -0.67027949
  0.28560000   0.67028170
  0.28560000  -0.67027949
  0.28560000   0.67028170
  0.28640000  -0.67010887
  0.28640000   0.67011115
  0.28640000  -0.67010887
  0.28640000   0.67011115
  0.28640000  -0.67010887
  0.28640000   0.67011115
  0.28640000  -0.67010887
  0.28640000   0.67011115
  0.28640000  -0.67010888
  0.28640000   0.67011115
  0.28640000  -0.67010888
  0.28640000   0.67011114
  0.28640000  -0.67010888
  0.28640000   0.67011114
  0.28640000  -0.67010888
  0.28640000   0.67011114
  0.28640000  -0.67010888
  0.28640000   0.67011114
  0.28640000  -0.67010889
  0.28640000   0.67011113
  0.28640000  -0.67010889
  0.28640000   0.67011113
  0.28640000  -0.67010889
  0.28640000   0.67011113
  0.28640000  -0.67010889
  0.28640000   0.67011113
  0.28640000  -0.67010890
  0.28640000   0.67011112
  0.28640000  -0.67010890
  0.28640000   0.67011112
  0.28640000  -0.67010890
  0.28640000   0.67011112
  0.28640000  -0.67010890
  0.28640000   0.67011112
  0.28640000  -0.67010890
  0.28640000   0.67011112
  0.28640000  -0.67010891
  0.28640000   0.67011111
  0.28640000  -0.67010891
  0.28640000   0.67011111
  0.28720000  -0.66993808
  0.28720000   0.66994036
  0.28720000  -0.66993808
  0.28720000   0.66994036
  0.28720000  -0.66993809
  0.28720000   0.66994036
  0.28720000  -0.66993809
  0.28720000   0.66994036
  0.28720000  -0.66993809
  0.28720000   0.66994035
  0.28720000  -0.66993809
  0.28720000   0.66994035
  0.28720000  -0.66993810
  0.28720000   0.66994035
  0.28720000  -0.66993810
  0.28720000   0.66994035
  0.28720000  -0.66993810
  0.28720000   0.66994035
  0.28720000  -0.66993810
  0.28720000   0.66994034
  0.28720000  -0.66993811
  0.28720000   0.66994034
  0.28720000  -0.66993811
  0.28720000   0.66994034
  0.28720000  -0.66993811
  0.28720000   0.66994034
  0.28720000  -0.66993811
  0.28720000   0.66994033
  0.28720000  -0.66993811
  0.28720000   0.66994033
  0.28720000  -0.66993812
  0.28720000   0.66994033
  0.28720000  -0.66993812
  0.28720000   0.66994033
  0.28720000  -0.66993812
  0.28720000   0.66994033
  0.28720000  -0.66993812
  0.28720000   0.66994032
  0.28720000  -0.66993813
  0.28720000   0.66994032
  0.28800000  -0.66976710
  0.28800000   0.66976937
  0.28800000  -0.66976710
  0.28800000   0.66976937
  0.28800000  -0.66976710
  0.28800000   0.66976937
  0.28800000  -0.66976710
  0.28800000   0.66976937
  0.28800000  -0.66976711
  0.28800000   0.66976936
  0.28800000  -0.66976711
  0.28800000   0.66976936
  0.28800000  -0.66976711
  0.28800000   0.66976936
  0.28800000  -0.66976711
  0.28800000   0.66976936
  0.28800000  -0.66976712
  0.28800000   0.66976935
  0.28800000  -0.66976712
  0.28800000   0.66976935
  0.28800000  -0.66976712
  0.28800000   0.66976935
  0.28800000  -0.66976712
  0.28800000   0.66976935
  0.28800000  -0.66976712
  0.28800000   0.66976935
  0.28800000  -0.66976713
  0.28800000   0.66976934
  0.28800000  -0.66976713
  0.28800000   0.66976934
  0.28800000  -0.66976713
  0.28800000   0.66976934
  0.28800000  -0.66976713
  0.28800000   0.66976934
  0.28800000  -0.66976714
  0.28800000   0.66976933
  0.28800000  -0.66976714
  0.28800000   0.66976933
  0.28800000  -0.66976714
  0.28800000   0.66976933
  0.28880000  -0.66959591
  0.28880000   0.66959818
  0.28880000  -0.66959591
  0.28880000   0.66959818
  0.28880000  -0.66959592
  0.28880000   0.66959817
  0.28880000  -0.66959592
  0.28880000   0.66959817
  0.28880000  -0.66959592
  0.28880000   0.66959817
  0.28880000  -0.66959592
  0.28880000   0.66959817
  0.28880000  -0.66959593
  0.28880000   0.66959817
  0.28880000  -0.66959593
  0.28880000   0.66959816
  0.28880000  -0.66959593
  0.28880000   0.66959816
  0.28880000  -0.66959593
  0.28880000   0.66959816
  0.28880000  -0.66959593
  0.28880000   0.66959816
  0.28880000  -0.66959594
  0.28880000   0.66959815
  0.28880000  -0.66959594
  0.28880000   0.66959815
  0.28880000  -0.66959594
  0.28880000   0.66959815
  0.28880000  -0.66959594
  0.28880000   0.66959815
  0.28880000  -0.66959595
  0.28880000   0.66959815
  0.28880000  -0.66959595
  0.28880000   0.66959814
  0.28880000  -0.66959595
  0.28880000   0.66959814
  0.28880000  -0.66959595
  0.28880000   0.66959814
  0.28880000  -0.66959595
  0.28880000   0.66959814
  0.28960000  -0.66942452
  0.28960000   0.66942678
  0.28960000  -0.66942453
  0.28960000   0.66942678
  0.28960000  -0.66942453
  0.28960000   0.66942678
  0.28960000  -0.66942453
  0.28960000   0.66942678
  0.28960000  -0.66942453
  0.28960000   0.66942678
  0.28960000  -0.66942453
  0.28960000   0.66942677
  0.28960000  -0.66942454
  0.28960000   0.66942677
  0.28960000  -0.66942454
  0.28960000   0.66942677
  0.28960000  -0.66942454
  0.28960000   0.66942677
  0.28960000  -0.66942454
  0.28960000   0.66942676
  0.28960000  -0.66942455
  0.28960000   0.66942676
  0.28960000  -0.66942455
  0.28960000   0.66942676
  0.28960000  -0.66942455
  0.28960000   0.66942676
  0.28960000  -0.66942455
  0.28960000   0.66942676
  0.28960000  -0.66942455
  0.28960000   0.66942675
  0.28960000  -0.66942456
  0.28960000   0.66942675
  0.28960000  -0.66942456
  0.28960000   0.66942675
  0.28960000  -0.66942456
  0.28960000   0.66942675
  0.28960000  -0.66942456
  0.28960000   0.66942674
  0.28960000  -0.66942457
  0.28960000   0.66942674
  0.29040000  -0.66925293
  0.29040000   0.66925519
  0.29040000  -0.66925293
  0.29040000   0.66925519
  0.29040000  -0.66925294
  0.29040000   0.66925518
  0.29040000  -0.66925294
  0.29040000   0.66925518
  0.29040000  -0.66925294
  0.29040000   0.66925518
  0.29040000  -0.66925294
  0.29040000   0.66925518
  0.29040000  -0.66925295
  0.29040000   0.66925517
  0.29040000  -0.66925295
  0.29040000   0.66925517
  0.29040000  -0.66925295
  0.29040000   0.66925517
  0.29040000  -0.66925295
  0.29040000   0.66925517
  0.29040000  -0.66925296
  0.29040000   0.66925517
  0.29040000  -0.66925296
  0.29040000   0.66925516
  0.29040000  -0.66925296
  0.29040000   0.66925516
  0.29040000  -0.66925296
  0.29040000   0.66925516
  0.29040000  -0.66925296
  0.29040000   0.66925516
  0.29040000  -0.66925297
  0.29040000   0.66925515
  0.29040000  -0.66925297
  0.29040000   0.66925515
  0.29040000  -0.66925297
  0.29040000   0.66925515
  0.29040000  -0.66925297
  0.29040000   0.66925515
  0.29040000  -0.66925297
  0.29040000   0.66925515
  0.29120000  -0.66908114
  0.29120000   0.66908339
  0.29120000  -0.66908114
  0.29120000   0.66908339
  0.29120000  -0.66908114
  0.29120000   0.66908338
  0.29120000  -0.66908115
  0.29120000   0.66908338
  0.29120000  -0.66908115
  0.29120000   0.66908338
  0.29120000  -0.66908115
  0.29120000   0.66908338
  0.29120000  -0.66908115
  0.29120000   0.66908337
  0.29120000  -0.66908116
  0.29120000   0.66908337
  0.29120000  -0.66908116
  0.29120000   0.66908337
  0.29120000  -0.66908116
  0.29120000   0.66908337
  0.29120000  -0.66908116
  0.29120000   0.66908337
  0.29120000  -0.66908116
  0.29120000   0.66908336
  0.29120000  -0.66908117
  0.29120000   0.66908336
  0.29120000  -0.66908117
  0.29120000   0.66908336
  0.29120000  -0.66908117
  0.29120000   0.66908336
  0.29120000  -0.66908117
  0.29120000   0.66908335
  0.29120000  -0.66908118
  0.29120000   0.66908335
  0.29120000  -0.66908118
  0.29120000   0.66908335
  0.29120000  -0.66908118
  0.29120000   0.66908335
  0.29120000  -0.66908118
  0.29120000   0.66908335
  0.29200000  -0.66890914
  0.29200000   0.66891139
  0.29200000  -0.66890915
  0.29200000   0.66891138
  0.29200000  -0.66890915
  0.29200000   0.66891138
  0.29200000  -0.66890915
  0.29200000   0.66891138
  0.29200000  -0.66890915
  0.29200000   0.66891138
  0.29200000  -0.66890915
  0.29200000   0.66891137
  0.29200000  -0.66890916
  0.29200000   0.66891137
  0.29200000  -0.66890916
  0.29200000   0.66891137
  0.29200000  -0.66890916
  0.29200000   0.66891137
  0.29200000  -0.66890916
  0.29200000   0.66891137
  0.29200000  -0.66890917
  0.29200000   0.66891136
  0.29200000  -0.66890917
  0.29200000   0.66891136
  0.29200000  -0.66890917
  0.29200000   0.66891136
  0.29200000  -0.66890917
  0.29200000   0.66891136
  0.29200000  -0.66890917
  0.29200000   0.66891135
  0.29200000  -0.66890918
  0.29200000   0.66891135
  0.29200000  -0.66890918
  0.29200000   0.66891135
  0.29200000  -0.66890918
  0.29200000   0.66891135
  0.29200000  -0.66890918
  0.29200000   0.66891135
  0.29200000  -0.66890919
  0.29200000   0.66891134
  0.29280000  -0.66873694
  0.29280000   0.66873918
  0.29280000  -0.66873695
  0.29280000   0.66873918
  0.29280000  -0.66873695
  0.29280000   0.66873918
  0.29280000  -0.66873695
  0.29280000   0.66873917
  0.29280000  -0.66873695
  0.29280000   0.66873917
  0.29280000  -0.66873696
  0.29280000   0.66873917
  0.29280000  -0.66873696
  0.29280000   0.66873917
  0.29280000  -0.66873696
  0.29280000   0.66873916
  0.29280000  -0.66873696
  0.29280000   0.66873916
  0.29280000  -0.66873696
  0.29280000   0.66873916
  0.29280000  -0.66873697
  0.29280000   0.66873916
  0.29280000  -0.66873697
  0.29280000   0.66873916
  0.29280000  -0.66873697
  0.29280000   0.66873915
  0.29280000  -0.66873697
  0.29280000   0.66873915
  0.29280000  -0.66873698
  0.29280000   0.66873915
  0.29280000  -0.66873698
  0.29280000   0.66873915
  0.29280000  -0.66873698
  0.29280000   0.66873914
  0.29280000  -0.66873698
  0.29280000   0.66873914
  0.29280000  -0.66873698
  0.29280000   0.66873914
  0.29280000  -0.66873699
  0.29280000   0.66873914
  0.29360000  -0.66856454
  0.29360000   0.66856677
  0.29360000  -0.66856454
  0.29360000   0.66856677
  0.29360000  -0.66856455
  0.29360000   0.66856677
  0.29360000  -0.66856455
  0.29360000   0.66856676
  0.29360000  -0.66856455
  0.29360000   0.66856676
  0.29360000  -0.66856455
  0.29360000   0.66856676
  0.29360000  -0.66856455
  0.29360000   0.66856676
  0.29360000  -0.66856456
  0.29360000   0.66856675
  0.29360000  -0.66856456
  0.29360000   0.66856675
  0.29360000  -0.66856456
  0.29360000   0.66856675
  0.29360000  -0.66856456
  0.29360000   0.66856675
  0.29360000  -0.66856457
  0.29360000   0.66856675
  0.29360000  -0.66856457
  0.29360000   0.66856674
  0.29360000  -0.66856457
  0.29360000   0.66856674
  0.29360000  -0.66856457
  0.29360000   0.66856674
  0.29360000  -0.66856457
  0.29360000   0.66856674
  0.29360000  -0.66856458
  0.29360000   0.66856673
  0.29360000  -0.66856458
  0.29360000   0.66856673
  0.29360000  -0.66856458
  0.29360000   0.66856673
  0.29360000  -0.66856458
  0.29360000   0.66856673
  0.29440000  -0.66839193
  0.29440000   0.66839416
  0.29440000  -0.66839194
  0.29440000   0.66839415
  0.29440000  -0.66839194
  0.29440000   0.66839415
  0.29440000  -0.66839194
  0.29440000   0.66839415
  0.29440000  -0.66839194
  0.29440000   0.66839415
  0.29440000  -0.66839195
  0.29440000   0.66839415
  0.29440000  -0.66839195
  0.29440000   0.66839414
  0.29440000  -0.66839195
  0.29440000   0.66839414
  0.29440000  -0.66839195
  0.29440000   0.66839414
  0.29440000  -0.66839195
  0.29440000   0.66839414
  0.29440000  -0.66839196
  0.29440000   0.66839413
  0.29440000  -0.66839196
  0.29440000   0.66839413
  0.29440000  -0.66839196
  0.29440000   0.66839413
  0.29440000  -0.66839196
  0.29440000   0.66839413
  0.29440000  -0.66839196
  0.29440000   0.66839413
  0.29440000  -0.66839197
  0.29440000   0.66839412
  0.29440000  -0.66839197
  0.29440000   0.66839412
  0.29440000  -0.66839197
  0.29440000   0.66839412
  0.29440000  -0.66839197
  0.29440000   0.66839412
  0.29440000  -0.66839198
  0.29440000   0.66839411
  0.29520000  -0.66821912
  0.29520000   0.66822134
  0.29520000  -0.66821912
  0.29520000   0.66822134
  0.29520000  -0.66821913
  0.29520000   0.66822133
  0.29520000  -0.66821913
  0.29520000   0.66822133
  0.29520000  -0.66821913
  0.29520000   0.66822133
  0.29520000  -0.66821913
  0.29520000   0.66822133
  0.29520000  -0.66821914
  0.29520000   0.66822133
  0.29520000  -0.66821914
  0.29520000   0.66822132
  0.29520000  -0.66821914
  0.29520000   0.66822132
  0.29520000  -0.66821914
  0.29520000   0.66822132
  0.29520000  -0.66821914
  0.29520000   0.66822132
  0.29520000  -0.66821915
  0.29520000   0.66822131
  0.29520000  -0.66821915
  0.29520000   0.66822131
  0.29520000  -0.66821915
  0.29520000   0.66822131
  0.29520000  -0.66821915
  0.29520000   0.66822131
  0.29520000  -0.66821916
  0.29520000   0.66822131
  0.29520000  -0.66821916
  0.29520000   0.66822130
  0.29520000  -0.66821916
  0.29520000   0.66822130
  0.29520000  -0.66821916
  0.29520000   0.66822130
  0.29520000  -0.66821916
  0.29520000   0.66822130
  0.29600000  -0.66804611
  0.29600000   0.66804832
  0.29600000  -0.66804611
  0.29600000   0.66804831
  0.29600000  -0.66804611
  0.29600000   0.66804831
  0.29600000  -0.66804611
  0.29600000   0.66804831
  0.29600000  -0.66804611
  0.29600000   0.66804831
  0.29600000  -0.66804612
  0.29600000   0.66804830
  0.29600000  -0.66804612
  0.29600000   0.66804830
  0.29600000  -0.66804612
  0.29600000   0.66804830
  0.29600000  -0.66804612
  0.29600000   0.66804830
  0.29600000  -0.66804613
  0.29600000   0.66804830
  0.29600000  -0.66804613
  0.29600000   0.66804829
  0.29600000  -0.66804613
  0.29600000   0.66804829
  0.29600000  -0.66804613
  0.29600000   0.66804829
  0.29600000  -0.66804613
  0.29600000   0.66804829
  0.29600000  -0.66804614
  0.29600000   0.66804828
  0.29600000  -0.66804614
  0.29600000   0.66804828
  0.29600000  -0.66804614
  0.29600000   0.66804828
  0.29600000  -0.66804614
  0.29600000   0.66804828
  0.29600000  -0.66804615
  0.29600000   0.66804828
  0.29600000  -0.66804615
  0.29600000   0.66804827
  0.29680000  -0.66787288
  0.29680000   0.66787509
  0.29680000  -0.66787289
  0.29680000   0.66787509
  0.29680000  -0.66787289
  0.29680000   0.66787508
  0.29680000  -0.66787289
  0.29680000   0.66787508
  0.29680000  -0.66787289
  0.29680000   0.66787508
  0.29680000  -0.66787290
  0.29680000   0.66787508
  0.29680000  -0.66787290
  0.29680000   0.66787507
  0.29680000  -0.66787290
  0.29680000   0.66787507
  0.29680000  -0.66787290
  0.29680000   0.66787507
  0.29680000  -0.66787290
  0.29680000   0.66787507
  0.29680000  -0.66787291
  0.29680000   0.66787507
  0.29680000  -0.66787291
  0.29680000   0.66787506
  0.29680000  -0.66787291
  0.29680000   0.66787506
  0.29680000  -0.66787291
  0.29680000   0.66787506
  0.29680000  -0.66787291
  0.29680000   0.66787506
  0.29680000  -0.66787292
  0.29680000   0.66787505
  0.29680000  -0.66787292
  0.29680000   0.66787505
  0.29680000  -0.66787292
  0.29680000   0.66787505
  0.29680000  -0.66787292
  0.29680000   0.66787505
  0.29680000  -0.66787293
  0.29680000   0.66787505
  0.29760000  -0.66769946
  0.29760000   0.66770165
  0.29760000  -0.66769946
  0.29760000   0.66770165
  0.29760000  -0.66769946
  0.29760000   0.66770165
  0.29760000  -0.66769946
  0.29760000   0.66770165
  0.29760000  -0.66769947
  0.29760000   0.66770164
  0.29760000  -0.66769947
  0.29760000   0.66770164
  0.29760000  -0.66769947
  0.29760000   0.66770164
  0.29760000  -0.66769947
  0.29760000   0.66770164
  0.29760000  -0.66769947
  0.29760000   0.66770164
  0.29760000  -0.66769948
  0.29760000   0.66770163
  0.29760000  -0.66769948
  0.29760000   0.66770163
  0.29760000  -0.66769948
  0.29760000   0.66770163
  0.29760000  -0.66769948
  0.29760000   0.66770163
  0.29760000  -0.66769949
  0.29760000   0.66770163
  0.29760000  -0.66769949
  0.29760000   0.66770162
  0.29760000  -0.66769949
  0.29760000   0.66770162
  0.29760000  -0.66769949
  0.29760000   0.66770162
  0.29760000  -0.66769949
  0.29760000   0.66770162
  0.29760000  -0.66769950
  0.29760000   0.66770161
  0.29760000  -0.66769950
  0.29760000   0.66770161
  0.29840000  -0.66752582
  0.29840000   0.66752801
  0.29840000  -0.66752583
  0.29840000   0.66752801
  0.29840000  -0.66752583
  0.29840000   0.66752801
  0.29840000  -0.66752583
  0.29840000   0.66752801
  0.29840000  -0.66752583
  0.29840000   0.66752800
  0.29840000  -0.66752583
  0.29840000   0.66752800
  0.29840000  -0.66752584
  0.29840000   0.66752800
  0.29840000  -0.66752584
  0.29840000   0.66752800
  0.29840000  -0.66752584
  0.29840000   0.66752800
  0.29840000  -0.66752584
  0.29840000   0.66752799
  0.29840000  -0.66752585
  0.29840000   0.66752799
  0.29840000  -0.66752585
  0.29840000   0.66752799
  0.29840000  -0.66752585
  0.29840000   0.66752799
  0.29840000  -0.66752585
  0.29840000   0.66752799
  0.29840000  -0.66752585
  0.29840000   0.66752798
  0.29840000  -0.66752586
  0.29840000   0.66752798
  0.29840000  -0.66752586
  0.29840000   0.66752798
  0.29840000  -0.66752586
  0.29840000   0.66752798
  0.29840000  -0.66752586
  0.29840000   0.66752797
  0.29840000  -0.66752586
  0.29840000   0.66752797
  0.29920000  -0.66735198
  0.29920000   0.66735417
  0.29920000  -0.66735199
  0.29920000   0.66735417
  0.29920000  -0.66735199
  0.29920000   0.66735416
  0.29920000  -0.66735199
  0.29920000   0.66735416
  0.29920000  -0.66735199
  0.29920000   0.66735416
  0.29920000  -0.66735199
  0.29920000   0.66735416
  0.29920000  -0.66735200
  0.29920000   0.66735415
  0.29920000  -0.66735200
  0.29920000   0.66735415
  0.29920000  -0.66735200
  0.29920000   0.66735415
  0.29920000  -0.66735200
  0.29920000   0.66735415
  0.29920000  -0.66735201
  0.29920000   0.66735415
  0.29920000  -0.66735201
  0.29920000   0.66735414
  0.29920000  -0.66735201
  0.29920000   0.66735414
  0.29920000  -0.66735201
  0.29920000   0.66735414
  0.29920000  -0.66735201
  0.29920000   0.66735414
  0.29920000  -0.66735202
  0.29920000   0.66735414
  0.29920000  -0.66735202
  0.29920000   0.66735413
  0.29920000  -0.66735202
  0.29920000   0.66735413
  0.29920000  -0.66735202
  0.29920000   0.66735413
  0.29920000  -0.66735202
  0.29920000   0.66735413
  0.30000000  -0.66717794
  0.30000000   0.66718011
  0.30000000  -0.66717794
  0.30000000   0.66718011
  0.30000000  -0.66717794
  0.30000000   0.66718011
  0.30000000  -0.66717794
  0.30000000   0.66718011
  0.30000000  -0.66717795
  0.30000000   0.66718011
  0.30000000  -0.66717795
  0.30000000   0.66718010
  0.30000000  -0.66717795
  0.30000000   0.66718010
  0.30000000  -0.66717795
  0.30000000   0.66718010
  0.30000000  -0.66717795
  0.30000000   0.66718010
  0.30000000  -0.66717796
  0.30000000   0.66718009
  0.30000000  -0.66717796
  0.30000000   0.66718009
  0.30000000  -0.66717796
  0.30000000   0.66718009
  0.30000000  -0.66717796
  0.30000000   0.66718009
  0.30000000  -0.66717797
  0.30000000   0.66718009
  0.30000000  -0.66717797
  0.30000000   0.66718008
  0.30000000  -0.66717797
  0.30000000   0.66718008
  0.30000000  -0.66717797
  0.30000000   0.66718008
  0.30000000  -0.66717797
  0.30000000   0.66718008
  0.30000000  -0.66717798
  0.30000000   0.66718008
  0.30000000  -0.66717798
  0.30000000   0.66718007
  0.30080000  -0.66700368
  0.30080000   0.66700585
  0.30080000  -0.66700369
  0.30080000   0.66700585
  0.30080000  -0.66700369
  0.30080000   0.66700585
  0.30080000  -0.66700369
  0.30080000   0.66700585
  0.30080000  -0.66700369
  0.30080000   0.66700585
  0.30080000  -0.66700369
  0.30080000   0.66700584
  0.30080000  -0.66700370
  0.30080000   0.66700584
  0.30080000  -0.66700370
  0.30080000   0.66700584
  0.30080000  -0.66700370
  0.30080000   0.66700584
  0.30080000  -0.66700370
  0.30080000   0.66700583
  0.30080000  -0.66700371
  0.30080000   0.66700583
  0.30080000  -0.66700371
  0.30080000   0.66700583
  0.30080000  -0.66700371
  0.30080000   0.66700583
  0.30080000  -0.66700371
  0.30080000   0.66700583
  0.30080000  -0.66700371
  0.30080000   0.66700582
  0.30080000  -0.66700372
  0.30080000   0.66700582
  0.30080000  -0.66700372
  0.30080000   0.66700582
  0.30080000  -0.66700372
  0.30080000   0.66700582
  0.30080000  -0.66700372
  0.30080000   0.66700582
  0.30080000  -0.66700372
  0.30080000   0.66700581
  0.30160000  -0.66682922
  0.30160000   0.66683139
  0.30160000  -0.66682922
  0.30160000   0.66683138
  0.30160000  -0.66682923
  0.30160000   0.66683138
  0.30160000  -0.66682923
  0.30160000   0.66683138
  0.30160000  -0.66682923
  0.30160000   0.66683138
  0.30160000  -0.66682923
  0.30160000   0.66683138
  0.30160000  -0.66682924
  0.30160000   0.66683137
  0.30160000  -0.66682924
  0.30160000   0.66683137
  0.30160000  -0.66682924
  0.30160000   0.66683137
  0.30160000  -0.66682924
  0.30160000   0.66683137
  0.30160000  -0.66682924
  0.30160000   0.66683137
  0.30160000  -0.66682925
  0.30160000   0.66683136
  0.30160000  -0.66682925
  0.30160000   0.66683136
  0.30160000  -0.66682925
  0.30160000   0.66683136
  0.30160000  -0.66682925
  0.30160000   0.66683136
  0.30160000  -0.66682925
  0.30160000   0.66683135
  0.30160000  -0.66682926
  0.30160000   0.66683135
  0.30160000  -0.66682926
  0.30160000   0.66683135
  0.30160000  -0.66682926
  0.30160000   0.66683135
  0.30160000  -0.66682926
  0.30160000   0.66683135
  0.30240000  -0.66665455
  0.30240000   0.66665671
  0.30240000  -0.66665456
  0.30240000   0.66665671
  0.30240000  -0.66665456
  0.30240000   0.66665671
  0.30240000  -0.66665456
  0.30240000   0.66665670
  0.30240000  -0.66665456
  0.30240000   0.66665670
  0.30240000  -0.66665456
  0.30240000   0.66665670
  0.30240000  -0.66665457
  0.30240000   0.66665670
  0.30240000  -0.66665457
  0.30240000   0.66665670
  0.30240000  -0.66665457
  0.30240000   0.66665669
  0.30240000  -0.66665457
  0.30240000   0.66665669
  0.30240000  -0.66665457
  0.30240000   0.66665669
  0.30240000  -0.66665458
  0.30240000   0.66665669
  0.30240000  -0.66665458
  0.30240000   0.66665669
  0.30240000  -0.66665458
  0.30240000   0.66665668
  0.30240000  -0.66665458
  0.30240000   0.66665668
  0.30240000  -0.66665459
  0.30240000   0.66665668
  0.30240000  -0.66665459
  0.30240000   0.66665668
  0.30240000  -0.66665459
  0.30240000   0.66665667
  0.30240000  -0.66665459
  0.30240000   0.66665667
  0.30240000  -0.66665459
  0.30240000   0.66665667
  0.30320000  -0.66647968
  0.30320000   0.66648183
  0.30320000  -0.66647968
  0.30320000   0.66648183
  0.30320000  -0.66647968
  0.30320000   0.66648182
  0.30320000  -0.66647968
  0.30320000   0.66648182
  0.30320000  -0.66647968
  0.30320000   0.66648182
  0.30320000  -0.66647969
  0.30320000   0.66648182
  0.30320000  -0.66647969
  0.30320000   0.66648181
  0.30320000  -0.66647969
  0.30320000   0.66648181
  0.30320000  -0.66647969
  0.30320000   0.66648181
  0.30320000  -0.66647970
  0.30320000   0.66648181
  0.30320000  -0.66647970
  0.30320000   0.66648181
  0.30320000  -0.66647970
  0.30320000   0.66648180
  0.30320000  -0.66647970
  0.30320000   0.66648180
  0.30320000  -0.66647970
  0.30320000   0.66648180
  0.30320000  -0.66647971
  0.30320000   0.66648180
  0.30320000  -0.66647971
  0.30320000   0.66648180
  0.30320000  -0.66647971
  0.30320000   0.66648179
  0.30320000  -0.66647971
  0.30320000   0.66648179
  0.30320000  -0.66647971
  0.30320000   0.66648179
  0.30320000  -0.66647972
  0.30320000   0.66648179
  0.30400000  -0.66630459
  0.30400000   0.66630673
  0.30400000  -0.66630459
  0.30400000   0.66630673
  0.30400000  -0.66630459
  0.30400000   0.66630673
  0.30400000  -0.66630460
  0.30400000   0.66630673
  0.30400000  -0.66630460
  0.30400000   0.66630673
  0.30400000  -0.66630460
  0.30400000   0.66630672
  0.30400000  -0.66630460
  0.30400000   0.66630672
  0.30400000  -0.66630460
  0.30400000   0.66630672
  0.30400000  -0.66630461
  0.30400000   0.66630672
  0.30400000  -0.66630461
  0.30400000   0.66630672
  0.30400000  -0.66630461
  0.30400000   0.66630671
  0.30400000  -0.66630461
  0.30400000   0.66630671
  0.30400000  -0.66630462
  0.30400000   0.66630671
  0.30400000  -0.66630462
  0.30400000   0.66630671
  0.30400000  -0.66630462
  0.30400000   0.66630670
  0.30400000  -0.66630462
  0.30400000   0.66630670
  0.30400000  -0.66630462
  0.30400000   0.66630670
  0.30400000  -0.66630463
  0.30400000   0.66630670
  0.30400000  -0.66630463
  0.30400000   0.66630670
  0.30400000  -0.66630463
  0.30400000   0.66630669
  0.30480000  -0.66612929
  0.30480000   0.66613143
  0.30480000  -0.66612930
  0.30480000   0.66613143
  0.30480000  -0.66612930
  0.30480000   0.66613143
  0.30480000  -0.66612930
  0.30480000   0.66613143
  0.30480000  -0.66612930
  0.30480000   0.66613142
  0.30480000  -0.66612930
  0.30480000   0.66613142
  0.30480000  -0.66612931
  0.30480000   0.66613142
  0.30480000  -0.66612931
  0.30480000   0.66613142
  0.30480000  -0.66612931
  0.30480000   0.66613142
  0.30480000  -0.66612931
  0.30480000   0.66613141
  0.30480000  -0.66612932
  0.30480000   0.66613141
  0.30480000  -0.66612932
  0.30480000   0.66613141
  0.30480000  -0.66612932
  0.30480000   0.66613141
  0.30480000  -0.66612932
  0.30480000   0.66613141
  0.30480000  -0.66612932
  0.30480000   0.66613140
  0.30480000  -0.66612933
  0.30480000   0.66613140
  0.30480000  -0.66612933
  0.30480000   0.66613140
  0.30480000  -0.66612933
  0.30480000   0.66613140
  0.30480000  -0.66612933
  0.30480000   0.66613140
  0.30480000  -0.66612933
  0.30480000   0.66613139
  0.30560000  -0.66595379
  0.30560000   0.66595592
  0.30560000  -0.66595379
  0.30560000   0.66595592
  0.30560000  -0.66595379
  0.30560000   0.66595592
  0.30560000  -0.66595380
  0.30560000   0.66595592
  0.30560000  -0.66595380
  0.30560000   0.66595591
  0.30560000  -0.66595380
  0.30560000   0.66595591
  0.30560000  -0.66595380
  0.30560000   0.66595591
  0.30560000  -0.66595380
  0.30560000   0.66595591
  0.30560000  -0.66595381
  0.30560000   0.66595590
  0.30560000  -0.66595381
  0.30560000   0.66595590
  0.30560000  -0.66595381
  0.30560000   0.66595590
  0.30560000  -0.66595381
  0.30560000   0.66595590
  0.30560000  -0.66595381
  0.30560000   0.66595590
  0.30560000  -0.66595382
  0.30560000   0.66595589
  0.30560000  -0.66595382
  0.30560000   0.66595589
  0.30560000  -0.66595382
  0.30560000   0.66595589
  0.30560000  -0.66595382
  0.30560000   0.66595589
  0.30560000  -0.66595383
  0.30560000   0.66595589
  0.30560000  -0.66595383
  0.30560000   0.66595588
  0.30560000  -0.66595383
  0.30560000   0.66595588
  0.30640000  -0.66577807
  0.30640000   0.66578020
  0.30640000  -0.66577808
  0.30640000   0.66578020
  0.30640000  -0.66577808
  0.30640000   0.66578020
  0.30640000  -0.66577808
  0.30640000   0.66578019
  0.30640000  -0.66577808
  0.30640000   0.66578019
  0.30640000  -0.66577809
  0.30640000   0.66578019
  0.30640000  -0.66577809
  0.30640000   0.66578019
  0.30640000  -0.66577809
  0.30640000   0.66578019
  0.30640000  -0.66577809
  0.30640000   0.66578018
  0.30640000  -0.66577809
  0.30640000   0.66578018
  0.30640000  -0.66577810
  0.30640000   0.66578018
  0.30640000  -0.66577810
  0.30640000   0.66578018
  0.30640000  -0.66577810
  0.30640000   0.66578018
  0.30640000  -0.66577810
  0.30640000   0.66578017
  0.30640000  -0.66577810
  0.30640000   0.66578017
  0.30640000  -0.66577811
  0.30640000   0.66578017
  0.30640000  -0.66577811
  0.30640000   0.66578017
  0.30640000  -0.66577811
  0.30640000   0.66578016
  0.30640000  -0.66577811
  0.30640000   0.66578016
  0.30640000  -0.66577811
  0.30640000   0.66578016
  0.30720000  -0.66560215
  0.30720000   0.66560427
  0.30720000  -0.66560215
  0.30720000   0.66560427
  0.30720000  -0.66560215
  0.30720000   0.66560427
  0.30720000  -0.66560216
  0.30720000   0.66560426
  0.30720000  -0.66560216
  0.30720000   0.66560426
  0.30720000  -0.66560216
  0.30720000   0.66560426
  0.30720000  -0.66560216
  0.30720000   0.66560426
  0.30720000  -0.66560216
  0.30720000   0.66560425
  0.30720000  -0.66560217
  0.30720000   0.66560425
  0.30720000  -0.66560217
  0.30720000   0.66560425
  0.30720000  -0.66560217
  0.30720000   0.66560425
  0.30720000  -0.66560217
  0.30720000   0.66560425
  0.30720000  -0.66560218
  0.30720000   0.66560424
  0.30720000  -0.66560218
  0.30720000   0.66560424
  0.30720000  -0.66560218
  0.30720000   0.66560424
  0.30720000  -0.66560218
  0.30720000   0.66560424
  0.30720000  -0.66560218
  0.30720000   0.66560424
  0.30720000  -0.66560219
  0.30720000   0.66560423
  0.30720000  -0.66560219
  0.30720000   0.66560423
  0.30720000  -0.66560219
  0.30720000   0.66560423
  0.30800000  -0.66542601
  0.30800000   0.66542813
  0.30800000  -0.66542602
  0.30800000   0.66542813
  0.30800000  -0.66542602
  0.30800000   0.66542812
  0.30800000  -0.66542602
  0.30800000   0.66542812
  0.30800000  -0.66542602
  0.30800000   0.66542812
  0.30800000  -0.66542602
  0.30800000   0.66542812
  0.30800000  -0.66542603
  0.30800000   0.66542811
  0.30800000  -0.66542603
  0.30800000   0.66542811
  0.30800000  -0.66542603
  0.30800000   0.66542811
  0.30800000  -0.66542603
  0.30800000   0.66542811
  0.30800000  -0.66542604
  0.30800000   0.66542811
  0.30800000  -0.66542604
  0.30800000   0.66542810
  0.30800000  -0.66542604
  0.30800000   0.66542810
  0.30800000  -0.66542604
  0.30800000   0.66542810
  0.30800000  -0.66542604
  0.30800000   0.66542810
  0.30800000  -0.66542605
  0.30800000   0.66542810
  0.30800000  -0.66542605
  0.30800000   0.66542809
  0.30800000  -0.66542605
  0.30800000   0.66542809
  0.30800000  -0.66542605
  0.30800000   0.66542809
  0.30800000  -0.66542605
  0.30800000   0.66542809
  0.30880000  -0.66524967
  0.30880000   0.66525177
  0.30880000  -0.66524967
  0.30880000   0.66525177
  0.30880000  -0.66524967
  0.30880000   0.66525177
  0.30880000  -0.66524967
  0.30880000   0.66525177
  0.30880000  -0.66524968
  0.30880000   0.66525177
  0.30880000  -0.66524968
  0.30880000   0.66525176
  0.30880000  -0.66524968
  0.30880000   0.66525176
  0.30880000  -0.66524968
  0.30880000   0.66525176
  0.30880000  -0.66524968
  0.30880000   0.66525176
  0.30880000  -0.66524969
  0.30880000   0.66525176
  0.30880000  -0.66524969
  0.30880000   0.66525175
  0.30880000  -0.66524969
  0.30880000   0.66525175
  0.30880000  -0.66524969
  0.30880000   0.66525175
  0.30880000  -0.66524969
  0.30880000   0.66525175
  0.30880000  -0.66524970
  0.30880000   0.66525174
  0.30880000  -0.66524970
  0.30880000   0.66525174
  0.30880000  -0.66524970
  0.30880000   0.66525174
  0.30880000  -0.66524970
  0.30880000   0.66525174
  0.30880000  -0.66524970
  0.30880000   0.66525174
  0.30880000  -0.66524971
  0.30880000   0.66525173
  0.30960000  -0.66507311
  0.30960000   0.66507521
  0.30960000  -0.66507311
  0.30960000   0.66507521
  0.30960000  -0.66507311
  0.30960000   0.66507521
  0.30960000  -0.66507312
  0.30960000   0.66507520
  0.30960000  -0.66507312
  0.30960000   0.66507520
  0.30960000  -0.66507312
  0.30960000   0.66507520
  0.30960000  -0.66507312
  0.30960000   0.66507520
  0.30960000  -0.66507312
  0.30960000   0.66507519
  0.30960000  -0.66507313
  0.30960000   0.66507519
  0.30960000  -0.66507313
  0.30960000   0.66507519
  0.30960000  -0.66507313
  0.30960000   0.66507519
  0.30960000  -0.66507313
  0.30960000   0.66507519
  0.30960000  -0.66507313
  0.30960000   0.66507518
  0.30960000  -0.66507314
  0.30960000   0.66507518
  0.30960000  -0.66507314
  0.30960000   0.66507518
  0.30960000  -0.66507314
  0.30960000   0.66507518
  0.30960000  -0.66507314
  0.30960000   0.66507518
  0.30960000  -0.66507314
  0.30960000   0.66507517
  0.30960000  -0.66507315
  0.30960000   0.66507517
  0.30960000  -0.66507315
  0.30960000   0.66507517
  0.31040000  -0.66489634
  0.31040000   0.66489843
  0.31040000  -0.66489634
  0.31040000   0.66489843
  0.31040000  -0.66489634
  0.31040000   0.66489843
  0.31040000  -0.66489634
  0.31040000   0.66489843
  0.31040000  -0.66489635
  0.31040000   0.66489842
  0.31040000  -0.66489635
  0.31040000   0.66489842
  0.31040000  -0.66489635
  0.31040000   0.66489842
  0.31040000  -0.66489635
  0.31040000   0.66489842
  0.31040000  -0.66489636
  0.31040000   0.66489842
  0.31040000  -0.66489636
  0.31040000   0.66489841
  0.31040000  -0.66489636
  0.31040000   0.66489841
  0.31040000  -0.66489636
  0.31040000   0.66489841
  0.31040000  -0.66489636
  0.31040000   0.66489841
  0.31040000  -0.66489637
  0.31040000   0.66489841
  0.31040000  -0.66489637
  0.31040000   0.66489840
  0.31040000  -0.66489637
  0.31040000   0.66489840
  0.31040000  -0.66489637
  0.31040000   0.66489840
  0.31040000  -0.66489637
  0.31040000   0.66489840
  0.31040000  -0.66489638
  0.31040000   0.66489840
  0.31040000  -0.66489638
  0.31040000   0.66489839
  0.31120000  -0.66471936
  0.31120000   0.66472144
  0.31120000  -0.66471936
  0.31120000   0.66472144
  0.31120000  -0.66471936
  0.31120000   0.66472144
  0.31120000  -0.66471936
  0.31120000   0.66472144
  0.31120000  -0.66471936
  0.31120000   0.66472144
  0.31120000  -0.66471937
  0.31120000   0.66472143
  0.31120000  -0.66471937
  0.31120000   0.66472143
  0.31120000  -0.66471937
  0.31120000   0.66472143
  0.31120000  -0.66471937
  0.31120000   0.66472143
  0.31120000  -0.66471938
  0.31120000   0.66472143
  0.31120000  -0.66471938
  0.31120000   0.66472142
  0.31120000  -0.66471938
  0.31120000   0.66472142
  0.31120000  -0.66471938
  0.31120000   0.66472142
  0.31120000  -0.66471938
  0.31120000   0.66472142
  0.31120000  -0.66471939
  0.31120000   0.66472142
  0.31120000  -0.66471939
  0.31120000   0.66472141
  0.31120000  -0.66471939
  0.31120000   0.66472141
  0.31120000  -0.66471939
  0.31120000   0.66472141
  0.31120000  -0.66471939
  0.31120000   0.66472141
  0.31120000  -0.66471940
  0.31120000   0.66472141
  0.31200000  -0.66454216
  0.31200000   0.66454424
  0.31200000  -0.66454216
  0.31200000   0.66454424
  0.31200000  -0.66454217
  0.31200000   0.66454424
  0.31200000  -0.66454217
  0.31200000   0.66454424
  0.31200000  -0.66454217
  0.31200000   0.66454423
  0.31200000  -0.66454217
  0.31200000   0.66454423
  0.31200000  -0.66454217
  0.31200000   0.66454423
  0.31200000  -0.66454218
  0.31200000   0.66454423
  0.31200000  -0.66454218
  0.31200000   0.66454423
  0.31200000  -0.66454218
  0.31200000   0.66454422
  0.31200000  -0.66454218
  0.31200000   0.66454422
  0.31200000  -0.66454218
  0.31200000   0.66454422
  0.31200000  -0.66454219
  0.31200000   0.66454422
  0.31200000  -0.66454219
  0.31200000   0.66454422
  0.31200000  -0.66454219
  0.31200000   0.66454421
  0.31200000  -0.66454219
  0.31200000   0.66454421
  0.31200000  -0.66454219
  0.31200000   0.66454421
  0.31200000  -0.66454220
  0.31200000   0.66454421
  0.31200000  -0.66454220
  0.31200000   0.66454421
  0.31200000  -0.66454220
  0.31200000   0.66454420
  0.31280000  -0.66436475
  0.31280000   0.66436683
  0.31280000  -0.66436475
  0.31280000   0.66436683
  0.31280000  -0.66436476
  0.31280000   0.66436682
  0.31280000  -0.66436476
  0.31280000   0.66436682
  0.31280000  -0.66436476
  0.31280000   0.66436682
  0.31280000  -0.66436476
  0.31280000   0.66436682
  0.31280000  -0.66436477
  0.31280000   0.66436682
  0.31280000  -0.66436477
  0.31280000   0.66436681
  0.31280000  -0.66436477
  0.31280000   0.66436681
  0.31280000  -0.66436477
  0.31280000   0.66436681
  0.31280000  -0.66436477
  0.31280000   0.66436681
  0.31280000  -0.66436478
  0.31280000   0.66436681
  0.31280000  -0.66436478
  0.31280000   0.66436680
  0.31280000  -0.66436478
  0.31280000   0.66436680
  0.31280000  -0.66436478
  0.31280000   0.66436680
  0.31280000  -0.66436478
  0.31280000   0.66436680
  0.31280000  -0.66436479
  0.31280000   0.66436680
  0.31280000  -0.66436479
  0.31280000   0.66436679
  0.31280000  -0.66436479
  0.31280000   0.66436679
  0.31280000  -0.66436479
  0.31280000   0.66436679
  0.31360000  -0.66418713
  0.31360000   0.66418920
  0.31360000  -0.66418713
  0.31360000   0.66418920
  0.31360000  -0.66418714
  0.31360000   0.66418920
  0.31360000  -0.66418714
  0.31360000   0.66418919
  0.31360000  -0.66418714
  0.31360000   0.66418919
  0.31360000  -0.66418714
  0.31360000   0.66418919
  0.31360000  -0.66418714
  0.31360000   0.66418919
  0.31360000  -0.66418715
  0.31360000   0.66418919
  0.31360000  -0.66418715
  0.31360000   0.66418918
  0.31360000  -0.66418715
  0.31360000   0.66418918
  0.31360000  -0.66418715
  0.31360000   0.66418918
  0.31360000  -0.66418715
  0.31360000   0.66418918
  0.31360000  -0.66418716
  0.31360000   0.66418918
  0.31360000  -0.66418716
  0.31360000   0.66418917
  0.31360000  -0.66418716
  0.31360000   0.66418917
  0.31360000  -0.66418716
  0.31360000   0.66418917
  0.31360000  -0.66418716
  0.31360000   0.66418917
  0.31360000  -0.66418717
  0.31360000   0.66418917
  0.31360000  -0.66418717
  0.31360000   0.66418916
  0.31360000  -0.66418717
  0.31360000   0.66418916
  0.31440000  -0.66400930
  0.31440000   0.66401136
  0.31440000  -0.66400930
  0.31440000   0.66401136
  0.31440000  -0.66400930
  0.31440000   0.66401135
  0.31440000  -0.66400930
  0.31440000   0.66401135
  0.31440000  -0.66400930
  0.31440000   0.66401135
  0.31440000  -0.66400931
  0.31440000   0.66401135
  0.31440000  -0.66400931
  0.31440000   0.66401135
  0.31440000  -0.66400931
  0.31440000   0.66401134
  0.31440000  -0.66400931
  0.31440000   0.66401134
  0.31440000  -0.66400931
  0.31440000   0.66401134
  0.31440000  -0.66400932
  0.31440000   0.66401134
  0.31440000  -0.66400932
  0.31440000   0.66401134
  0.31440000  -0.66400932
  0.31440000   0.66401133
  0.31440000  -0.66400932
  0.31440000   0.66401133
  0.31440000  -0.66400932
  0.31440000   0.66401133
  0.31440000  -0.66400933
  0.31440000   0.66401133
  0.31440000  -0.66400933
  0.31440000   0.66401133
  0.31440000  -0.66400933
  0.31440000   0.66401132
  0.31440000  -0.66400933
  0.31440000   0.66401132
  0.31440000  -0.66400933
  0.31440000   0.66401132
  0.31520000  -0.66383125
  0.31520000   0.66383330
  0.31520000  -0.66383125
  0.31520000   0.66383330
  0.31520000  -0.66383125
  0.31520000   0.66383330
  0.31520000  -0.66383125
  0.31520000   0.66383330
  0.31520000  -0.66383125
  0.31520000   0.66383329
  0.31520000  -0.66383126
  0.31520000   0.66383329
  0.31520000  -0.66383126
  0.31520000   0.66383329
  0.31520000  -0.66383126
  0.31520000   0.66383329
  0.31520000  -0.66383126
  0.31520000   0.66383329
  0.31520000  -0.66383126
  0.31520000   0.66383328
  0.31520000  -0.66383127
  0.31520000   0.66383328
  0.31520000  -0.66383127
  0.31520000   0.66383328
  0.31520000  -0.66383127
  0.31520000   0.66383328
  0.31520000  -0.66383127
  0.31520000   0.66383328
  0.31520000  -0.66383127
  0.31520000   0.66383327
  0.31520000  -0.66383128
  0.31520000   0.66383327
  0.31520000  -0.66383128
  0.31520000   0.66383327
  0.31520000  -0.66383128
  0.31520000   0.66383327
  0.31520000  -0.66383128
  0.31520000   0.66383327
  0.31520000  -0.66383128
  0.31520000   0.66383326
  0.31600000  -0.66365298
  0.31600000   0.66365503
  0.31600000  -0.66365298
  0.31600000   0.66365503
  0.31600000  -0.66365298
  0.31600000   0.66365503
  0.31600000  -0.66365299
  0.31600000   0.66365502
  0.31600000  -0.66365299
  0.31600000   0.66365502
  0.31600000  -0.66365299
  0.31600000   0.66365502
  0.31600000  -0.66365299
  0.31600000   0.66365502
  0.31600000  -0.66365300
  0.31600000   0.66365502
  0.31600000  -0.66365300
  0.31600000   0.66365501
  0.31600000  -0.66365300
  0.31600000   0.66365501
  0.31600000  -0.66365300
  0.31600000   0.66365501
  0.31600000  -0.66365300
  0.31600000   0.66365501
  0.31600000  -0.66365301
  0.31600000   0.66365501
  0.31600000  -0.66365301
  0.31600000   0.66365500
  0.31600000  -0.66365301
  0.31600000   0.66365500
  0.31600000  -0.66365301
  0.31600000   0.66365500
  0.31600000  -0.66365301
  0.31600000   0.66365500
  0.31600000  -0.66365302
  0.31600000   0.66365500
  0.31600000  -0.66365302
  0.31600000   0.66365499
  0.31600000  -0.66365302
  0.31600000   0.66365499
  0.31680000  -0.66347450
  0.31680000   0.66347654
  0.31680000  -0.66347450
  0.31680000   0.66347654
  0.31680000  -0.66347451
  0.31680000   0.66347654
  0.31680000  -0.66347451
  0.31680000   0.66347654
  0.31680000  -0.66347451
  0.31680000   0.66347654
  0.31680000  -0.66347451
  0.31680000   0.66347653
  0.31680000  -0.66347451
  0.31680000   0.66347653
  0.31680000  -0.66347452
  0.31680000   0.66347653
  0.31680000  -0.66347452
  0.31680000   0.66347653
  0.31680000  -0.66347452
  0.31680000   0.66347653
  0.31680000  -0.66347452
  0.31680000   0.66347652
  0.31680000  -0.66347452
  0.31680000   0.66347652
  0.31680000  -0.66347453
  0.31680000   0.66347652
  0.31680000  -0.66347453
  0.31680000   0.66347652
  0.31680000  -0.66347453
  0.31680000   0.66347652
  0.31680000  -0.66347453
  0.31680000   0.66347651
  0.31680000  -0.66347453
  0.31680000   0.66347651
  0.31680000  -0.66347454
  0.31680000   0.66347651
  0.31680000  -0.66347454
  0.31680000   0.66347651
  0.31680000  -0.66347454
  0.31680000   0.66347651
  0.31760000  -0.66329581
  0.31760000   0.66329784
  0.31760000  -0.66329581
  0.31760000   0.66329784
  0.31760000  -0.66329581
  0.31760000   0.66329784
  0.31760000  -0.66329581
  0.31760000   0.66329784
  0.31760000  -0.66329581
  0.31760000   0.66329784
  0.31760000  -0.66329582
  0.31760000   0.66329783
  0.31760000  -0.66329582
  0.31760000   0.66329783
  0.31760000  -0.66329582
  0.31760000   0.66329783
  0.31760000  -0.66329582
  0.31760000   0.66329783
  0.31760000  -0.66329582
  0.31760000   0.66329782
  0.31760000  -0.66329583
  0.31760000   0.66329782
  0.31760000  -0.66329583
  0.31760000   0.66329782
  0.31760000  -0.66329583
  0.31760000   0.66329782
  0.31760000  -0.66329583
  0.31760000   0.66329782
  0.31760000  -0.66329583
  0.31760000   0.66329781
  0.31760000  -0.66329584
  0.31760000   0.66329781
  0.31760000  -0.66329584
  0.31760000   0.66329781
  0.31760000  -0.66329584
  0.31760000   0.66329781
  0.31760000  -0.66329584
  0.31760000   0.66329781
  0.31760000  -0.66329584
  0.31760000   0.66329781
  0.31840000  -0.66311689
  0.31840000   0.66311893
  0.31840000  -0.66311690
  0.31840000   0.66311892
  0.31840000  -0.66311690
  0.31840000   0.66311892
  0.31840000  -0.66311690
  0.31840000   0.66311892
  0.31840000  -0.66311690
  0.31840000   0.66311892
  0.31840000  -0.66311690
  0.31840000   0.66311892
  0.31840000  -0.66311691
  0.31840000   0.66311891
  0.31840000  -0.66311691
  0.31840000   0.66311891
  0.31840000  -0.66311691
  0.31840000   0.66311891
  0.31840000  -0.66311691
  0.31840000   0.66311891
  0.31840000  -0.66311691
  0.31840000   0.66311891
  0.31840000  -0.66311692
  0.31840000   0.66311890
  0.31840000  -0.66311692
  0.31840000   0.66311890
  0.31840000  -0.66311692
  0.31840000   0.66311890
  0.31840000  -0.66311692
  0.31840000   0.66311890
  0.31840000  -0.66311692
  0.31840000   0.66311890
  0.31840000  -0.66311693
  0.31840000   0.66311889
  0.31840000  -0.66311693
  0.31840000   0.66311889
  0.31840000  -0.66311693
  0.31840000   0.66311889
  0.31840000  -0.66311693
  0.31840000   0.66311889
  0.31920000  -0.66293777
  0.31920000   0.66293979
  0.31920000  -0.66293777
  0.31920000   0.66293979
  0.31920000  -0.66293777
  0.31920000   0.66293979
  0.31920000  -0.66293777
  0.31920000   0.66293979
  0.31920000  -0.66293778
  0.31920000   0.66293978
  0.31920000  -0.66293778
  0.31920000   0.66293978
  0.31920000  -0.66293778
  0.31920000   0.66293978
  0.31920000  -0.66293778
  0.31920000   0.66293978
  0.31920000  -0.66293778
  0.31920000   0.66293978
  0.31920000  -0.66293779
  0.31920000   0.66293977
  0.31920000  -0.66293779
  0.31920000   0.66293977
  0.31920000  -0.66293779
  0.31920000   0.66293977
  0.31920000  -0.66293779
  0.31920000   0.66293977
  0.31920000  -0.66293779
  0.31920000   0.66293977
  0.31920000  -0.66293780
  0.31920000   0.66293976
  0.31920000  -0.66293780
  0.31920000   0.66293976
  0.31920000  -0.66293780
  0.31920000   0.66293976
  0.31920000  -0.66293780
  0.31920000   0.66293976
  0.31920000  -0.66293780
  0.31920000   0.66293976
  0.31920000  -0.66293780
  0.31920000   0.66293975
  0.32000000  -0.66275842
  0.32000000   0.66276044
  0.32000000  -0.66275842
  0.32000000   0.66276044
  0.32000000  -0.66275843
  0.32000000   0.66276044
  0.32000000  -0.66275843
  0.32000000   0.66276044
  0.32000000  -0.66275843
  0.32000000   0.66276043
  0.32000000  -0.66275843
  0.32000000   0.66276043
  0.32000000  -0.66275843
  0.32000000   0.66276043
  0.32000000  -0.66275844
  0.32000000   0.66276043
  0.32000000  -0.66275844
  0.32000000   0.66276043
  0.32000000  -0.66275844
  0.32000000   0.66276042
  0.32000000  -0.66275844
  0.32000000   0.66276042
  0.32000000  -0.66275844
  0.32000000   0.66276042
  0.32000000  -0.66275845
  0.32000000   0.66276042
  0.32000000  -0.66275845
  0.32000000   0.66276042
  0.32000000  -0.66275845
  0.32000000   0.66276041
  0.32000000  -0.66275845
  0.32000000   0.66276041
  0.32000000  -0.66275845
  0.32000000   0.66276041
  0.32000000  -0.66275846
  0.32000000   0.66276041
  0.32000000  -0.66275846
  0.32000000   0.66276041
  0.32000000  -0.66275846
  0.32000000   0.66276040
  0.32080000  -0.66257886
  0.32080000   0.66258087
  0.32080000  -0.66257886
  0.32080000   0.66258087
  0.32080000  -0.66257887
  0.32080000   0.66258087
  0.32080000  -0.66257887
  0.32080000   0.66258087
  0.32080000  -0.66257887
  0.32080000   0.66258087
  0.32080000  -0.66257887
  0.32080000   0.66258086
  0.32080000  -0.66257887
  0.32080000   0.66258086
  0.32080000  -0.66257888
  0.32080000   0.66258086
  0.32080000  -0.66257888
  0.32080000   0.66258086
  0.32080000  -0.66257888
  0.32080000   0.66258086
  0.32080000  -0.66257888
  0.32080000   0.66258085
  0.32080000  -0.66257888
  0.32080000   0.66258085
  0.32080000  -0.66257889
  0.32080000   0.66258085
  0.32080000  -0.66257889
  0.32080000   0.66258085
  0.32080000  -0.66257889
  0.32080000   0.66258085
  0.32080000  -0.66257889
  0.32080000   0.66258084
  0.32080000  -0.66257889
  0.32080000   0.66258084
  0.32080000  -0.66257889
  0.32080000   0.66258084
  0.32080000  -0.66257890
  0.32080000   0.66258084
  0.32080000  -0.66257890
  0.32080000   0.66258084
  0.32160000  -0.66239908
  0.32160000   0.66240109
  0.32160000  -0.66239908
  0.32160000   0.66240109
  0.32160000  -0.66239909
  0.32160000   0.66240108
  0.32160000  -0.66239909
  0.32160000   0.66240108
  0.32160000  -0.66239909
  0.32160000   0.66240108
  0.32160000  -0.66239909
  0.32160000   0.66240108
  0.32160000  -0.66239909
  0.32160000   0.66240108
  0.32160000  -0.66239910
  0.32160000   0.66240107
  0.32160000  -0.66239910
  0.32160000   0.66240107
  0.32160000  -0.66239910
  0.32160000   0.66240107
  0.32160000  -0.66239910
  0.32160000   0.66240107
  0.32160000  -0.66239910
  0.32160000   0.66240107
  0.32160000  -0.66239911
  0.32160000   0.66240106
  0.32160000  -0.66239911
  0.32160000   0.66240106
  0.32160000  -0.66239911
  0.32160000   0.66240106
  0.32160000  -0.66239911
  0.32160000   0.66240106
  0.32160000  -0.66239911
  0.32160000   0.66240106
  0.32160000  -0.66239912
  0.32160000   0.66240105
  0.32160000  -0.66239912
  0.32160000   0.66240105
  0.32160000  -0.66239912
  0.32160000   0.66240105
  0.32240000  -0.66221908
  0.32240000   0.66222109
  0.32240000  -0.66221909
  0.32240000   0.66222108
  0.32240000  -0.66221909
  0.32240000   0.66222108
  0.32240000  -0.66221909
  0.32240000   0.66222108
  0.32240000  -0.66221909
  0.32240000   0.66222108
  0.32240000  -0.66221909
  0.32240000   0.66222107
  0.32240000  -0.66221910
  0.32240000   0.66222107
  0.32240000  -0.66221910
  0.32240000   0.66222107
  0.32240000  -0.66221910
  0.32240000   0.66222107
  0.32240000  -0.66221910
  0.32240000   0.66222107
  0.32240000  -0.66221910
  0.32240000   0.66222106
  0.32240000  -0.66221911
  0.32240000   0.66222106
  0.32240000  -0.66221911
  0.32240000   0.66222106
  0.32240000  -0.66221911
  0.32240000   0.66222106
  0.32240000  -0.66221911
  0.32240000   0.66222106
  0.32240000  -0.66221911
  0.32240000   0.66222106
  0.32240000  -0.66221912
  0.32240000   0.66222105
  0.32240000  -0.66221912
  0.32240000   0.66222105
  0.32240000  -0.66221912
  0.32240000   0.66222105
  0.32240000  -0.66221912
  0.32240000   0.66222105
  0.32320000  -0.66203887
  0.32320000   0.66204086
  0.32320000  -0.66203887
  0.32320000   0.66204086
  0.32320000  -0.66203887
  0.32320000   0.66204086
  0.32320000  -0.66203888
  0.32320000   0.66204086
  0.32320000  -0.66203888
  0.32320000   0.66204086
  0.32320000  -0.66203888
  0.32320000   0.66204085
  0.32320000  -0.66203888
  0.32320000   0.66204085
  0.32320000  -0.66203888
  0.32320000   0.66204085
  0.32320000  -0.66203889
  0.32320000   0.66204085
  0.32320000  -0.66203889
  0.32320000   0.66204085
  0.32320000  -0.66203889
  0.32320000   0.66204084
  0.32320000  -0.66203889
  0.32320000   0.66204084
  0.32320000  -0.66203889
  0.32320000   0.66204084
  0.32320000  -0.66203890
  0.32320000   0.66204084
  0.32320000  -0.66203890
  0.32320000   0.66204084
  0.32320000  -0.66203890
  0.32320000   0.66204083
  0.32320000  -0.66203890
  0.32320000   0.66204083
  0.32320000  -0.66203890
  0.32320000   0.66204083
  0.32320000  -0.66203890
  0.32320000   0.66204083
  0.32320000  -0.66203891
  0.32320000   0.66204083
  0.32400000  -0.66185843
  0.32400000   0.66186042
  0.32400000  -0.66185844
  0.32400000   0.66186042
  0.32400000  -0.66185844
  0.32400000   0.66186042
  0.32400000  -0.66185844
  0.32400000   0.66186042
  0.32400000  -0.66185844
  0.32400000   0.66186041
  0.32400000  -0.66185845
  0.32400000   0.66186041
  0.32400000  -0.66185845
  0.32400000   0.66186041
  0.32400000  -0.66185845
  0.32400000   0.66186041
  0.32400000  -0.66185845
  0.32400000   0.66186041
  0.32400000  -0.66185845
  0.32400000   0.66186040
  0.32400000  -0.66185845
  0.32400000   0.66186040
  0.32400000  -0.66185846
  0.32400000   0.66186040
  0.32400000  -0.66185846
  0.32400000   0.66186040
  0.32400000  -0.66185846
  0.32400000   0.66186040
  0.32400000  -0.66185846
  0.32400000   0.66186039
  0.32400000  -0.66185846
  0.32400000   0.66186039
  0.32400000  -0.66185847
  0.32400000   0.66186039
  0.32400000  -0.66185847
  0.32400000   0.66186039
  0.32400000  -0.66185847
  0.32400000   0.66186039
  0.32400000  -0.66185847
  0.32400000   0.66186039
  0.32480000  -0.66167778
  0.32480000   0.66167976
  0.32480000  -0.66167778
  0.32480000   0.66167976
  0.32480000  -0.66167779
  0.32480000   0.66167976
  0.32480000  -0.66167779
  0.32480000   0.66167976
  0.32480000  -0.66167779
  0.32480000   0.66167975
  0.32480000  -0.66167779
  0.32480000   0.66167975
  0.32480000  -0.66167779
  0.32480000   0.66167975
  0.32480000  -0.66167780
  0.32480000   0.66167975
  0.32480000  -0.66167780
  0.32480000   0.66167975
  0.32480000  -0.66167780
  0.32480000   0.66167974
  0.32480000  -0.66167780
  0.32480000   0.66167974
  0.32480000  -0.66167780
  0.32480000   0.66167974
  0.32480000  -0.66167781
  0.32480000   0.66167974
  0.32480000  -0.66167781
  0.32480000   0.66167974
  0.32480000  -0.66167781
  0.32480000   0.66167974
  0.32480000  -0.66167781
  0.32480000   0.66167973
  0.32480000  -0.66167781
  0.32480000   0.66167973
  0.32480000  -0.66167781
  0.32480000   0.66167973
  0.32480000  -0.66167782
  0.32480000   0.66167973
  0.32480000  -0.66167782
  0.32480000   0.66167973
  0.32560000  -0.66149691
  0.32560000   0.66149888
  0.32560000  -0.66149691
  0.32560000   0.66149888
  0.32560000  -0.66149691
  0.32560000   0.66149888
  0.32560000  -0.66149691
  0.32560000   0.66149888
  0.32560000  -0.66149692
  0.32560000   0.66149888
  0.32560000  -0.66149692
  0.32560000   0.66149887
  0.32560000  -0.66149692
  0.32560000   0.66149887
  0.32560000  -0.66149692
  0.32560000   0.66149887
  0.32560000  -0.66149692
  0.32560000   0.66149887
  0.32560000  -0.66149693
  0.32560000   0.66149887
  0.32560000  -0.66149693
  0.32560000   0.66149886
  0.32560000  -0.66149693
  0.32560000   0.66149886
  0.32560000  -0.66149693
  0.32560000   0.66149886
  0.32560000  -0.66149693
  0.32560000   0.66149886
  0.32560000  -0.66149694
  0.32560000   0.66149886
  0.32560000  -0.66149694
  0.32560000   0.66149885
  0.32560000  -0.66149694
  0.32560000   0.66149885
  0.32560000  -0.66149694
  0.32560000   0.66149885
  0.32560000  -0.66149694
  0.32560000   0.66149885
  0.32560000  -0.66149695
  0.32560000   0.66149885
  0.32640000  -0.66131581
  0.32640000   0.66131778
  0.32640000  -0.66131582
  0.32640000   0.66131778
  0.32640000  -0.66131582
  0.32640000   0.66131778
  0.32640000  -0.66131582
  0.32640000   0.66131778
  0.32640000  -0.66131582
  0.32640000   0.66131778
  0.32640000  -0.66131582
  0.32640000   0.66131777
  0.32640000  -0.66131583
  0.32640000   0.66131777
  0.32640000  -0.66131583
  0.32640000   0.66131777
  0.32640000  -0.66131583
  0.32640000   0.66131777
  0.32640000  -0.66131583
  0.32640000   0.66131777
  0.32640000  -0.66131583
  0.32640000   0.66131776
  0.32640000  -0.66131584
  0.32640000   0.66131776
  0.32640000  -0.66131584
  0.32640000   0.66131776
  0.32640000  -0.66131584
  0.32640000   0.66131776
  0.32640000  -0.66131584
  0.32640000   0.66131776
  0.32640000  -0.66131584
  0.32640000   0.66131775
  0.32640000  -0.66131585
  0.32640000   0.66131775
  0.32640000  -0.66131585
  0.32640000   0.66131775
  0.32640000  -0.66131585
  0.32640000   0.66131775
  0.32640000  -0.66131585
  0.32640000   0.66131775
  0.32720000  -0.66113450
  0.32720000   0.66113646
  0.32720000  -0.66113450
  0.32720000   0.66113646
  0.32720000  -0.66113450
  0.32720000   0.66113646
  0.32720000  -0.66113451
  0.32720000   0.66113646
  0.32720000  -0.66113451
  0.32720000   0.66113646
  0.32720000  -0.66113451
  0.32720000   0.66113645
  0.32720000  -0.66113451
  0.32720000   0.66113645
  0.32720000  -0.66113451
  0.32720000   0.66113645
  0.32720000  -0.66113452
  0.32720000   0.66113645
  0.32720000  -0.66113452
  0.32720000   0.66113645
  0.32720000  -0.66113452
  0.32720000   0.66113644
  0.32720000  -0.66113452
  0.32720000   0.66113644
  0.32720000  -0.66113452
  0.32720000   0.66113644
  0.32720000  -0.66113453
  0.32720000   0.66113644
  0.32720000  -0.66113453
  0.32720000   0.66113644
  0.32720000  -0.66113453
  0.32720000   0.66113643
  0.32720000  -0.66113453
  0.32720000   0.66113643
  0.32720000  -0.66113453
  0.32720000   0.66113643
  0.32720000  -0.66113454
  0.32720000   0.66113643
  0.32720000  -0.66113454
  0.32720000   0.66113643
  0.32800000  -0.66095297
  0.32800000   0.66095492
  0.32800000  -0.66095297
  0.32800000   0.66095492
  0.32800000  -0.66095297
  0.32800000   0.66095492
  0.32800000  -0.66095297
  0.32800000   0.66095492
  0.32800000  -0.66095297
  0.32800000   0.66095491
  0.32800000  -0.66095298
  0.32800000   0.66095491
  0.32800000  -0.66095298
  0.32800000   0.66095491
  0.32800000  -0.66095298
  0.32800000   0.66095491
  0.32800000  -0.66095298
  0.32800000   0.66095491
  0.32800000  -0.66095298
  0.32800000   0.66095490
  0.32800000  -0.66095299
  0.32800000   0.66095490
  0.32800000  -0.66095299
  0.32800000   0.66095490
  0.32800000  -0.66095299
  0.32800000   0.66095490
  0.32800000  -0.66095299
  0.32800000   0.66095490
  0.32800000  -0.66095299
  0.32800000   0.66095490
  0.32800000  -0.66095299
  0.32800000   0.66095489
  0.32800000  -0.66095300
  0.32800000   0.66095489
  0.32800000  -0.66095300
  0.32800000   0.66095489
  0.32800000  -0.66095300
  0.32800000   0.66095489
  0.32800000  -0.66095300
  0.32800000   0.66095489
  0.32880000  -0.66077121
  0.32880000   0.66077316
  0.32880000  -0.66077121
  0.32880000   0.66077316
  0.32880000  -0.66077121
  0.32880000   0.66077316
  0.32880000  -0.66077122
  0.32880000   0.66077315
  0.32880000  -0.66077122
  0.32880000   0.66077315
  0.32880000  -0.66077122
  0.32880000   0.66077315
  0.32880000  -0.66077122
  0.32880000   0.66077315
  0.32880000  -0.66077122
  0.32880000   0.66077315
  0.32880000  -0.66077123
  0.32880000   0.66077314
  0.32880000  -0.66077123
  0.32880000   0.66077314
  0.32880000  -0.66077123
  0.32880000   0.66077314
  0.32880000  -0.66077123
  0.32880000   0.66077314
  0.32880000  -0.66077123
  0.32880000   0.66077314
  0.32880000  -0.66077123
  0.32880000   0.66077313
  0.32880000  -0.66077124
  0.32880000   0.66077313
  0.32880000  -0.66077124
  0.32880000   0.66077313
  0.32880000  -0.66077124
  0.32880000   0.66077313
  0.32880000  -0.66077124
  0.32880000   0.66077313
  0.32880000  -0.66077124
  0.32880000   0.66077313
  0.32880000  -0.66077125
  0.32880000   0.66077312
  0.32960000  -0.66058923
  0.32960000   0.66059118
  0.32960000  -0.66058923
  0.32960000   0.66059117
  0.32960000  -0.66058924
  0.32960000   0.66059117
  0.32960000  -0.66058924
  0.32960000   0.66059117
  0.32960000  -0.66058924
  0.32960000   0.66059117
  0.32960000  -0.66058924
  0.32960000   0.66059117
  0.32960000  -0.66058924
  0.32960000   0.66059116
  0.32960000  -0.66058925
  0.32960000   0.66059116
  0.32960000  -0.66058925
  0.32960000   0.66059116
  0.32960000  -0.66058925
  0.32960000   0.66059116
  0.32960000  -0.66058925
  0.32960000   0.66059116
  0.32960000  -0.66058925
  0.32960000   0.66059115
  0.32960000  -0.66058925
  0.32960000   0.66059115
  0.32960000  -0.66058926
  0.32960000   0.66059115
  0.32960000  -0.66058926
  0.32960000   0.66059115
  0.32960000  -0.66058926
  0.32960000   0.66059115
  0.32960000  -0.66058926
  0.32960000   0.66059115
  0.32960000  -0.66058926
  0.32960000   0.66059114
  0.32960000  -0.66058927
  0.32960000   0.66059114
  0.32960000  -0.66058927
  0.32960000   0.66059114
  0.33040000  -0.66040703
  0.33040000   0.66040897
  0.33040000  -0.66040703
  0.33040000   0.66040897
  0.33040000  -0.66040704
  0.33040000   0.66040897
  0.33040000  -0.66040704
  0.33040000   0.66040896
  0.33040000  -0.66040704
  0.33040000   0.66040896
  0.33040000  -0.66040704
  0.33040000   0.66040896
  0.33040000  -0.66040704
  0.33040000   0.66040896
  0.33040000  -0.66040704
  0.33040000   0.66040896
  0.33040000  -0.66040705
  0.33040000   0.66040895
  0.33040000  -0.66040705
  0.33040000   0.66040895
  0.33040000  -0.66040705
  0.33040000   0.66040895
  0.33040000  -0.66040705
  0.33040000   0.66040895
  0.33040000  -0.66040705
  0.33040000   0.66040895
  0.33040000  -0.66040706
  0.33040000   0.66040894
  0.33040000  -0.66040706
  0.33040000   0.66040894
  0.33040000  -0.66040706
  0.33040000   0.66040894
  0.33040000  -0.66040706
  0.33040000   0.66040894
  0.33040000  -0.66040706
  0.33040000   0.66040894
  0.33040000  -0.66040707
  0.33040000   0.66040894
  0.33040000  -0.66040707
  0.33040000   0.66040893
  0.33120000  -0.66022461
  0.33120000   0.66022654
  0.33120000  -0.66022461
  0.33120000   0.66022654
  0.33120000  -0.66022461
  0.33120000   0.66022654
  0.33120000  -0.66022461
  0.33120000   0.66022653
  0.33120000  -0.66022462
  0.33120000   0.66022653
  0.33120000  -0.66022462
  0.33120000   0.66022653
  0.33120000  -0.66022462
  0.33120000   0.66022653
  0.33120000  -0.66022462
  0.33120000   0.66022653
  0.33120000  -0.66022462
  0.33120000   0.66022653
  0.33120000  -0.66022463
  0.33120000   0.66022652
  0.33120000  -0.66022463
  0.33120000   0.66022652
  0.33120000  -0.66022463
  0.33120000   0.66022652
  0.33120000  -0.66022463
  0.33120000   0.66022652
  0.33120000  -0.66022463
  0.33120000   0.66022652
  0.33120000  -0.66022464
  0.33120000   0.66022651
  0.33120000  -0.66022464
  0.33120000   0.66022651
  0.33120000  -0.66022464
  0.33120000   0.66022651
  0.33120000  -0.66022464
  0.33120000   0.66022651
  0.33120000  -0.66022464
  0.33120000   0.66022651
  0.33120000  -0.66022464
  0.33120000   0.66022650
  0.33200000  -0.66004196
  0.33200000   0.66004389
  0.33200000  -0.66004196
  0.33200000   0.66004389
  0.33200000  -0.66004197
  0.33200000   0.66004388
  0.33200000  -0.66004197
  0.33200000   0.66004388
  0.33200000  -0.66004197
  0.33200000   0.66004388
  0.33200000  -0.66004197
  0.33200000   0.66004388
  0.33200000  -0.66004197
  0.33200000   0.66004388
  0.33200000  -0.66004198
  0.33200000   0.66004387
  0.33200000  -0.66004198
  0.33200000   0.66004387
  0.33200000  -0.66004198
  0.33200000   0.66004387
  0.33200000  -0.66004198
  0.33200000   0.66004387
  0.33200000  -0.66004198
  0.33200000   0.66004387
  0.33200000  -0.66004199
  0.33200000   0.66004387
  0.33200000  -0.66004199
  0.33200000   0.66004386
  0.33200000  -0.66004199
  0.33200000   0.66004386
  0.33200000  -0.66004199
  0.33200000   0.66004386
  0.33200000  -0.66004199
  0.33200000   0.66004386
  0.33200000  -0.66004199
  0.33200000   0.66004386
  0.33200000  -0.66004200
  0.33200000   0.66004385
  0.33200000  -0.66004200
  0.33200000   0.66004385
  0.33280000  -0.65985909
  0.33280000   0.65986101
  0.33280000  -0.65985909
  0.33280000   0.65986101
  0.33280000  -0.65985910
  0.33280000   0.65986101
  0.33280000  -0.65985910
  0.33280000   0.65986101
  0.33280000  -0.65985910
  0.33280000   0.65986101
  0.33280000  -0.65985910
  0.33280000   0.65986100
  0.33280000  -0.65985910
  0.33280000   0.65986100
  0.33280000  -0.65985911
  0.33280000   0.65986100
  0.33280000  -0.65985911
  0.33280000   0.65986100
  0.33280000  -0.65985911
  0.33280000   0.65986100
  0.33280000  -0.65985911
  0.33280000   0.65986099
  0.33280000  -0.65985911
  0.33280000   0.65986099
  0.33280000  -0.65985912
  0.33280000   0.65986099
  0.33280000  -0.65985912
  0.33280000   0.65986099
  0.33280000  -0.65985912
  0.33280000   0.65986099
  0.33280000  -0.65985912
  0.33280000   0.65986098
  0.33280000  -0.65985912
  0.33280000   0.65986098
  0.33280000  -0.65985913
  0.33280000   0.65986098
  0.33280000  -0.65985913
  0.33280000   0.65986098
  0.33280000  -0.65985913
  0.33280000   0.65986098
  0.33360000  -0.65967600
  0.33360000   0.65967791
  0.33360000  -0.65967600
  0.33360000   0.65967791
  0.33360000  -0.65967600
  0.33360000   0.65967791
  0.33360000  -0.65967601
  0.33360000   0.65967791
  0.33360000  -0.65967601
  0.33360000   0.65967791
  0.33360000  -0.65967601
  0.33360000   0.65967790
  0.33360000  -0.65967601
  0.33360000   0.65967790
  0.33360000  -0.65967601
  0.33360000   0.65967790
  0.33360000  -0.65967601
  0.33360000   0.65967790
  0.33360000  -0.65967602
  0.33360000   0.65967790
  0.33360000  -0.65967602
  0.33360000   0.65967789
  0.33360000  -0.65967602
  0.33360000   0.65967789
  0.33360000  -0.65967602
  0.33360000   0.65967789
  0.33360000  -0.65967602
  0.33360000   0.65967789
  0.33360000  -0.65967603
  0.33360000   0.65967789
  0.33360000  -0.65967603
  0.33360000   0.65967788
  0.33360000  -0.65967603
  0.33360000   0.65967788
  0.33360000  -0.65967603
  0.33360000   0.65967788
  0.33360000  -0.65967603
  0.33360000   0.65967788
  0.33360000  -0.65967604
  0.33360000   0.65967788
  0.33440000  -0.65949268
  0.33440000   0.65949459
  0.33440000  -0.65949268
  0.33440000   0.65949459
  0.33440000  -0.65949269
  0.33440000   0.65949459
  0.33440000  -0.65949269
  0.33440000   0.65949458
  0.33440000  -0.65949269
  0.33440000   0.65949458
  0.33440000  -0.65949269
  0.33440000   0.65949458
  0.33440000  -0.65949269
  0.33440000   0.65949458
  0.33440000  -0.65949269
  0.33440000   0.65949458
  0.33440000  -0.65949270
  0.33440000   0.65949457
  0.33440000  -0.65949270
  0.33440000   0.65949457
  0.33440000  -0.65949270
  0.33440000   0.65949457
  0.33440000  -0.65949270
  0.33440000   0.65949457
  0.33440000  -0.65949270
  0.33440000   0.65949457
  0.33440000  -0.65949271
  0.33440000   0.65949456
  0.33440000  -0.65949271
  0.33440000   0.65949456
  0.33440000  -0.65949271
  0.33440000   0.65949456
  0.33440000  -0.65949271
  0.33440000   0.65949456
  0.33440000  -0.65949271
  0.33440000   0.65949456
  0.33440000  -0.65949272
  0.33440000   0.65949456
  0.33440000  -0.65949272
  0.33440000   0.65949455
  0.33520000  -0.65930914
  0.33520000   0.65931104
  0.33520000  -0.65930914
  0.33520000   0.65931104
  0.33520000  -0.65930914
  0.33520000   0.65931104
  0.33520000  -0.65930914
  0.33520000   0.65931103
  0.33520000  -0.65930915
  0.33520000   0.65931103
  0.33520000  -0.65930915
  0.33520000   0.65931103
  0.33520000  -0.65930915
  0.33520000   0.65931103
  0.33520000  -0.65930915
  0.33520000   0.65931103
  0.33520000  -0.65930915
  0.33520000   0.65931103
  0.33520000  -0.65930916
  0.33520000   0.65931102
  0.33520000  -0.65930916
  0.33520000   0.65931102
  0.33520000  -0.65930916
  0.33520000   0.65931102
  0.33520000  -0.65930916
  0.33520000   0.65931102
  0.33520000  -0.65930916
  0.33520000   0.65931102
  0.33520000  -0.65930917
  0.33520000   0.65931101
  0.33520000  -0.65930917
  0.33520000   0.65931101
  0.33520000  -0.65930917
  0.33520000   0.65931101
  0.33520000  -0.65930917
  0.33520000   0.65931101
  0.33520000  -0.65930917
  0.33520000   0.65931101
  0.33520000  -0.65930917
  0.33520000   0.65931100
  0.33600000  -0.65912537
  0.33600000   0.65912727
  0.33600000  -0.65912537
  0.33600000   0.65912726
  0.33600000  -0.65912537
  0.33600000   0.65912726
  0.33600000  -0.65912538
  0.33600000   0.65912726
  0.33600000  -0.65912538
  0.33600000   0.65912726
  0.33600000  -0.65912538
  0.33600000   0.65912726
  0.33600000  -0.65912538
  0.33600000   0.65912726
  0.33600000  -0.65912538
  0.33600000   0.65912725
  0.33600000  -0.65912539
  0.33600000   0.65912725
  0.33600000  -0.65912539
  0.33600000   0.65912725
  0.33600000  -0.65912539
  0.33600000   0.65912725
  0.33600000  -0.65912539
  0.33600000   0.65912725
  0.33600000  -0.65912539
  0.33600000   0.65912724
  0.33600000  -0.65912540
  0.33600000   0.65912724
  0.33600000  -0.65912540
  0.33600000   0.65912724
  0.33600000  -0.65912540
  0.33600000   0.65912724
  0.33600000  -0.65912540
  0.33600000   0.65912724
  0.33600000  -0.65912540
  0.33600000   0.65912723
  0.33600000  -0.65912540
  0.33600000   0.65912723
  0.33600000  -0.65912541
  0.33600000   0.65912723
  0.33680000  -0.65894138
  0.33680000   0.65894327
  0.33680000  -0.65894138
  0.33680000   0.65894327
  0.33680000  -0.65894138
  0.33680000   0.65894326
  0.33680000  -0.65894138
  0.33680000   0.65894326
  0.33680000  -0.65894138
  0.33680000   0.65894326
  0.33680000  -0.65894139
  0.33680000   0.65894326
  0.33680000  -0.65894139
  0.33680000   0.65894326
  0.33680000  -0.65894139
  0.33680000   0.65894325
  0.33680000  -0.65894139
  0.33680000   0.65894325
  0.33680000  -0.65894139
  0.33680000   0.65894325
  0.33680000  -0.65894140
  0.33680000   0.65894325
  0.33680000  -0.65894140
  0.33680000   0.65894325
  0.33680000  -0.65894140
  0.33680000   0.65894324
  0.33680000  -0.65894140
  0.33680000   0.65894324
  0.33680000  -0.65894140
  0.33680000   0.65894324
  0.33680000  -0.65894141
  0.33680000   0.65894324
  0.33680000  -0.65894141
  0.33680000   0.65894324
  0.33680000  -0.65894141
  0.33680000   0.65894324
  0.33680000  -0.65894141
  0.33680000   0.65894323
  0.33680000  -0.65894141
  0.33680000   0.65894323
  0.33760000  -0.65875716
  0.33760000   0.65875904
  0.33760000  -0.65875716
  0.33760000   0.65875904
  0.33760000  -0.65875716
  0.33760000   0.65875904
  0.33760000  -0.65875716
  0.33760000   0.65875904
  0.33760000  -0.65875717
  0.33760000   0.65875903
  0.33760000  -0.65875717
  0.33760000   0.65875903
  0.33760000  -0.65875717
  0.33760000   0.65875903
  0.33760000  -0.65875717
  0.33760000   0.65875903
  0.33760000  -0.65875717
  0.33760000   0.65875903
  0.33760000  -0.65875717
  0.33760000   0.65875902
  0.33760000  -0.65875718
  0.33760000   0.65875902
  0.33760000  -0.65875718
  0.33760000   0.65875902
  0.33760000  -0.65875718
  0.33760000   0.65875902
  0.33760000  -0.65875718
  0.33760000   0.65875902
  0.33760000  -0.65875718
  0.33760000   0.65875901
  0.33760000  -0.65875719
  0.33760000   0.65875901
  0.33760000  -0.65875719
  0.33760000   0.65875901
  0.33760000  -0.65875719
  0.33760000   0.65875901
  0.33760000  -0.65875719
  0.33760000   0.65875901
  0.33760000  -0.65875719
  0.33760000   0.65875901
  0.33840000  -0.65857271
  0.33840000   0.65857459
  0.33840000  -0.65857271
  0.33840000   0.65857459
  0.33840000  -0.65857272
  0.33840000   0.65857459
  0.33840000  -0.65857272
  0.33840000   0.65857458
  0.33840000  -0.65857272
  0.33840000   0.65857458
  0.33840000  -0.65857272
  0.33840000   0.65857458
  0.33840000  -0.65857272
  0.33840000   0.65857458
  0.33840000  -0.65857272
  0.33840000   0.65857458
  0.33840000  -0.65857273
  0.33840000   0.65857457
  0.33840000  -0.65857273
  0.33840000   0.65857457
  0.33840000  -0.65857273
  0.33840000   0.65857457
  0.33840000  -0.65857273
  0.33840000   0.65857457
  0.33840000  -0.65857273
  0.33840000   0.65857457
  0.33840000  -0.65857274
  0.33840000   0.65857456
  0.33840000  -0.65857274
  0.33840000   0.65857456
  0.33840000  -0.65857274
  0.33840000   0.65857456
  0.33840000  -0.65857274
  0.33840000   0.65857456
  0.33840000  -0.65857274
  0.33840000   0.65857456
  0.33840000  -0.65857274
  0.33840000   0.65857456
  0.33840000  -0.65857275
  0.33840000   0.65857455
  0.33920000  -0.65838804
  0.33920000   0.65838991
  0.33920000  -0.65838804
  0.33920000   0.65838991
  0.33920000  -0.65838804
  0.33920000   0.65838991
  0.33920000  -0.65838804
  0.33920000   0.65838990
  0.33920000  -0.65838805
  0.33920000   0.65838990
  0.33920000  -0.65838805
  0.33920000   0.65838990
  0.33920000  -0.65838805
  0.33920000   0.65838990
  0.33920000  -0.65838805
  0.33920000   0.65838990
  0.33920000  -0.65838805
  0.33920000   0.65838989
  0.33920000  -0.65838806
  0.33920000   0.65838989
  0.33920000  -0.65838806
  0.33920000   0.65838989
  0.33920000  -0.65838806
  0.33920000   0.65838989
  0.33920000  -0.65838806
  0.33920000   0.65838989
  0.33920000  -0.65838806
  0.33920000   0.65838989
  0.33920000  -0.65838806
  0.33920000   0.65838988
  0.33920000  -0.65838807
  0.33920000   0.65838988
  0.33920000  -0.65838807
  0.33920000   0.65838988
  0.33920000  -0.65838807
  0.33920000   0.65838988
  0.33920000  -0.65838807
  0.33920000   0.65838988
  0.33920000  -0.65838807
  0.33920000   0.65838987
  0.34000000  -0.65820314
  0.34000000   0.65820500
  0.34000000  -0.65820314
  0.34000000   0.65820500
  0.34000000  -0.65820314
  0.34000000   0.65820500
  0.34000000  -0.65820314
  0.34000000   0.65820500
  0.34000000  -0.65820315
  0.34000000   0.65820500
  0.34000000  -0.65820315
  0.34000000   0.65820499
  0.34000000  -0.65820315
  0.34000000   0.65820499
  0.34000000  -0.65820315
  0.34000000   0.65820499
  0.34000000  -0.65820315
  0.34000000   0.65820499
  0.34000000  -0.65820315
  0.34000000   0.65820499
  0.34000000  -0.65820316
  0.34000000   0.65820498
  0.34000000  -0.65820316
  0.34000000   0.65820498
  0.34000000  -0.65820316
  0.34000000   0.65820498
  0.34000000  -0.65820316
  0.34000000   0.65820498
  0.34000000  -0.65820316
  0.34000000   0.65820498
  0.34000000  -0.65820317
  0.34000000   0.65820498
  0.34000000  -0.65820317
  0.34000000   0.65820497
  0.34000000  -0.65820317
  0.34000000   0.65820497
  0.34000000  -0.65820317
  0.34000000   0.65820497
  0.34000000  -0.65820317
  0.34000000   0.65820497
  0.34080000  -0.65801801
  0.34080000   0.65801987
  0.34080000  -0.65801801
  0.34080000   0.65801987
  0.34080000  -0.65801801
  0.34080000   0.65801986
  0.34080000  -0.65801801
  0.34080000   0.65801986
  0.34080000  -0.65801802
  0.34080000   0.65801986
  0.34080000  -0.65801802
  0.34080000   0.65801986
  0.34080000  -0.65801802
  0.34080000   0.65801986
  0.34080000  -0.65801802
  0.34080000   0.65801986
  0.34080000  -0.65801802
  0.34080000   0.65801985
  0.34080000  -0.65801803
  0.34080000   0.65801985
  0.34080000  -0.65801803
  0.34080000   0.65801985
  0.34080000  -0.65801803
  0.34080000   0.65801985
  0.34080000  -0.65801803
  0.34080000   0.65801985
  0.34080000  -0.65801803
  0.34080000   0.65801984
  0.34080000  -0.65801803
  0.34080000   0.65801984
  0.34080000  -0.65801804
  0.34080000   0.65801984
  0.34080000  -0.65801804
  0.34080000   0.65801984
  0.34080000  -0.65801804
  0.34080000   0.65801984
  0.34080000  -0.65801804
  0.34080000   0.65801984
  0.34080000  -0.65801804
  0.34080000   0.65801983
  0.34160000  -0.65783265
  0.34160000   0.65783451
  0.34160000  -0.65783265
  0.34160000   0.65783450
  0.34160000  -0.65783266
  0.34160000   0.65783450
  0.34160000  -0.65783266
  0.34160000   0.65783450
  0.34160000  -0.65783266
  0.34160000   0.65783450
  0.34160000  -0.65783266
  0.34160000   0.65783450
  0.34160000  -0.65783266
  0.34160000   0.65783449
  0.34160000  -0.65783267
  0.34160000   0.65783449
  0.34160000  -0.65783267
  0.34160000   0.65783449
  0.34160000  -0.65783267
  0.34160000   0.65783449
  0.34160000  -0.65783267
  0.34160000   0.65783449
  0.34160000  -0.65783267
  0.34160000   0.65783448
  0.34160000  -0.65783267
  0.34160000   0.65783448
  0.34160000  -0.65783268
  0.34160000   0.65783448
  0.34160000  -0.65783268
  0.34160000   0.65783448
  0.34160000  -0.65783268
  0.34160000   0.65783448
  0.34160000  -0.65783268
  0.34160000   0.65783448
  0.34160000  -0.65783268
  0.34160000   0.65783447
  0.34160000  -0.65783269
  0.34160000   0.65783447
  0.34160000  -0.65783269
  0.34160000   0.65783447
  0.34240000  -0.65764707
  0.34240000   0.65764891
  0.34240000  -0.65764707
  0.34240000   0.65764891
  0.34240000  -0.65764707
  0.34240000   0.65764891
  0.34240000  -0.65764707
  0.34240000   0.65764891
  0.34240000  -0.65764707
  0.34240000   0.65764891
  0.34240000  -0.65764708
  0.34240000   0.65764890
  0.34240000  -0.65764708
  0.34240000   0.65764890
  0.34240000  -0.65764708
  0.34240000   0.65764890
  0.34240000  -0.65764708
  0.34240000   0.65764890
  0.34240000  -0.65764708
  0.34240000   0.65764890
  0.34240000  -0.65764708
  0.34240000   0.65764890
  0.34240000  -0.65764709
  0.34240000   0.65764889
  0.34240000  -0.65764709
  0.34240000   0.65764889
  0.34240000  -0.65764709
  0.34240000   0.65764889
  0.34240000  -0.65764709
  0.34240000   0.65764889
  0.34240000  -0.65764709
  0.34240000   0.65764889
  0.34240000  -0.65764710
  0.34240000   0.65764888
  0.34240000  -0.65764710
  0.34240000   0.65764888
  0.34240000  -0.65764710
  0.34240000   0.65764888
  0.34240000  -0.65764710
  0.34240000   0.65764888
  0.34320000  -0.65746125
  0.34320000   0.65746309
  0.34320000  -0.65746125
  0.34320000   0.65746309
  0.34320000  -0.65746126
  0.34320000   0.65746309
  0.34320000  -0.65746126
  0.34320000   0.65746309
  0.34320000  -0.65746126
  0.34320000   0.65746309
  0.34320000  -0.65746126
  0.34320000   0.65746308
  0.34320000  -0.65746126
  0.34320000   0.65746308
  0.34320000  -0.65746126
  0.34320000   0.65746308
  0.34320000  -0.65746127
  0.34320000   0.65746308
  0.34320000  -0.65746127
  0.34320000   0.65746308
  0.34320000  -0.65746127
  0.34320000   0.65746307
  0.34320000  -0.65746127
  0.34320000   0.65746307
  0.34320000  -0.65746127
  0.34320000   0.65746307
  0.34320000  -0.65746128
  0.34320000   0.65746307
  0.34320000  -0.65746128
  0.34320000   0.65746307
  0.34320000  -0.65746128
  0.34320000   0.65746307
  0.34320000  -0.65746128
  0.34320000   0.65746306
  0.34320000  -0.65746128
  0.34320000   0.65746306
  0.34320000  -0.65746128
  0.34320000   0.65746306
  0.34320000  -0.65746129
  0.34320000   0.65746306
  0.34400000  -0.65727521
  0.34400000   0.65727704
  0.34400000  -0.65727521
  0.34400000   0.65727704
  0.34400000  -0.65727521
  0.34400000   0.65727704
  0.34400000  -0.65727521
  0.34400000   0.65727704
  0.34400000  -0.65727521
  0.34400000   0.65727703
  0.34400000  -0.65727522
  0.34400000   0.65727703
  0.34400000  -0.65727522
  0.34400000   0.65727703
  0.34400000  -0.65727522
  0.34400000   0.65727703
  0.34400000  -0.65727522
  0.34400000   0.65727703
  0.34400000  -0.65727522
  0.34400000   0.65727703
  0.34400000  -0.65727523
  0.34400000   0.65727702
  0.34400000  -0.65727523
  0.34400000   0.65727702
  0.34400000  -0.65727523
  0.34400000   0.65727702
  0.34400000  -0.65727523
  0.34400000   0.65727702
  0.34400000  -0.65727523
  0.34400000   0.65727702
  0.34400000  -0.65727523
  0.34400000   0.65727701
  0.34400000  -0.65727524
  0.34400000   0.65727701
  0.34400000  -0.65727524
  0.34400000   0.65727701
  0.34400000  -0.65727524
  0.34400000   0.65727701
  0.34400000  -0.65727524
  0.34400000   0.65727701
  0.34480000  -0.65708893
  0.34480000   0.65709076
  0.34480000  -0.65708893
  0.34480000   0.65709076
  0.34480000  -0.65708894
  0.34480000   0.65709076
  0.34480000  -0.65708894
  0.34480000   0.65709076
  0.34480000  -0.65708894
  0.34480000   0.65709075
  0.34480000  -0.65708894
  0.34480000   0.65709075
  0.34480000  -0.65708894
  0.34480000   0.65709075
  0.34480000  -0.65708895
  0.34480000   0.65709075
  0.34480000  -0.65708895
  0.34480000   0.65709075
  0.34480000  -0.65708895
  0.34480000   0.65709075
  0.34480000  -0.65708895
  0.34480000   0.65709074
  0.34480000  -0.65708895
  0.34480000   0.65709074
  0.34480000  -0.65708895
  0.34480000   0.65709074
  0.34480000  -0.65708896
  0.34480000   0.65709074
  0.34480000  -0.65708896
  0.34480000   0.65709074
  0.34480000  -0.65708896
  0.34480000   0.65709073
  0.34480000  -0.65708896
  0.34480000   0.65709073
  0.34480000  -0.65708896
  0.34480000   0.65709073
  0.34480000  -0.65708896
  0.34480000   0.65709073
  0.34480000  -0.65708897
  0.34480000   0.65709073
  0.34560000  -0.65690243
  0.34560000   0.65690425
  0.34560000  -0.65690243
  0.34560000   0.65690425
  0.34560000  -0.65690243
  0.34560000   0.65690425
  0.34560000  -0.65690243
  0.34560000   0.65690424
  0.34560000  -0.65690243
  0.34560000   0.65690424
  0.34560000  -0.65690244
  0.34560000   0.65690424
  0.34560000  -0.65690244
  0.34560000   0.65690424
  0.34560000  -0.65690244
  0.34560000   0.65690424
  0.34560000  -0.65690244
  0.34560000   0.65690424
  0.34560000  -0.65690244
  0.34560000   0.65690423
  0.34560000  -0.65690245
  0.34560000   0.65690423
  0.34560000  -0.65690245
  0.34560000   0.65690423
  0.34560000  -0.65690245
  0.34560000   0.65690423
  0.34560000  -0.65690245
  0.34560000   0.65690423
  0.34560000  -0.65690245
  0.34560000   0.65690423
  0.34560000  -0.65690245
  0.34560000   0.65690422
  0.34560000  -0.65690246
  0.34560000   0.65690422
  0.34560000  -0.65690246
  0.34560000   0.65690422
  0.34560000  -0.65690246
  0.34560000   0.65690422
  0.34560000  -0.65690246
  0.34560000   0.65690422
  0.34640000  -0.65671569
  0.34640000   0.65671751
  0.34640000  -0.65671569
  0.34640000   0.65671751
  0.34640000  -0.65671569
  0.34640000   0.65671750
  0.34640000  -0.65671570
  0.34640000   0.65671750
  0.34640000  -0.65671570
  0.34640000   0.65671750
  0.34640000  -0.65671570
  0.34640000   0.65671750
  0.34640000  -0.65671570
  0.34640000   0.65671750
  0.34640000  -0.65671570
  0.34640000   0.65671750
  0.34640000  -0.65671571
  0.34640000   0.65671749
  0.34640000  -0.65671571
  0.34640000   0.65671749
  0.34640000  -0.65671571
  0.34640000   0.65671749
  0.34640000  -0.65671571
  0.34640000   0.65671749
  0.34640000  -0.65671571
  0.34640000   0.65671749
  0.34640000  -0.65671571
  0.34640000   0.65671748
  0.34640000  -0.65671572
  0.34640000   0.65671748
  0.34640000  -0.65671572
  0.34640000   0.65671748
  0.34640000  -0.65671572
  0.34640000   0.65671748
  0.34640000  -0.65671572
  0.34640000   0.65671748
  0.34640000  -0.65671572
  0.34640000   0.65671748
  0.34640000  -0.65671572
  0.34640000   0.65671747
  0.34720000  -0.65652872
  0.34720000   0.65653053
  0.34720000  -0.65652872
  0.34720000   0.65653053
  0.34720000  -0.65652873
  0.34720000   0.65653053
  0.34720000  -0.65652873
  0.34720000   0.65653053
  0.34720000  -0.65652873
  0.34720000   0.65653053
  0.34720000  -0.65652873
  0.34720000   0.65653053
  0.34720000  -0.65652873
  0.34720000   0.65653052
  0.34720000  -0.65652874
  0.34720000   0.65653052
  0.34720000  -0.65652874
  0.34720000   0.65653052
  0.34720000  -0.65652874
  0.34720000   0.65653052
  0.34720000  -0.65652874
  0.34720000   0.65653052
  0.34720000  -0.65652874
  0.34720000   0.65653051
  0.34720000  -0.65652874
  0.34720000   0.65653051
  0.34720000  -0.65652875
  0.34720000   0.65653051
  0.34720000  -0.65652875
  0.34720000   0.65653051
  0.34720000  -0.65652875
  0.34720000   0.65653051
  0.34720000  -0.65652875
  0.34720000   0.65653051
  0.34720000  -0.65652875
  0.34720000   0.65653050
  0.34720000  -0.65652876
  0.34720000   0.65653050
  0.34720000  -0.65652876
  0.34720000   0.65653050
  0.34800000  -0.65634152
  0.34800000   0.65634333
  0.34800000  -0.65634153
  0.34800000   0.65634333
  0.34800000  -0.65634153
  0.34800000   0.65634333
  0.34800000  -0.65634153
  0.34800000   0.65634332
  0.34800000  -0.65634153
  0.34800000   0.65634332
  0.34800000  -0.65634153
  0.34800000   0.65634332
  0.34800000  -0.65634153
  0.34800000   0.65634332
  0.34800000  -0.65634154
  0.34800000   0.65634332
  0.34800000  -0.65634154
  0.34800000   0.65634331
  0.34800000  -0.65634154
  0.34800000   0.65634331
  0.34800000  -0.65634154
  0.34800000   0.65634331
  0.34800000  -0.65634154
  0.34800000   0.65634331
  0.34800000  -0.65634155
  0.34800000   0.65634331
  0.34800000  -0.65634155
  0.34800000   0.65634331
  0.34800000  -0.65634155
  0.34800000   0.65634330
  0.34800000  -0.65634155
  0.34800000   0.65634330
  0.34800000  -0.65634155
  0.34800000   0.65634330
  0.34800000  -0.65634155
  0.34800000   0.65634330
  0.34800000  -0.65634156
  0.34800000   0.65634330
  0.34800000  -0.65634156
  0.34800000   0.65634330
  0.34880000  -0.65615409
  0.34880000   0.65615589
  0.34880000  -0.65615409
  0.34880000   0.65615589
  0.34880000  -0.65615410
  0.34880000   0.65615589
  0.34880000  -0.65615410
  0.34880000   0.65615589
  0.34880000  -0.65615410
  0.34880000   0.65615588
  0.34880000  -0.65615410
  0.34880000   0.65615588
  0.34880000  -0.65615410
  0.34880000   0.65615588
  0.34880000  -0.65615410
  0.34880000   0.65615588
  0.34880000  -0.65615411
  0.34880000   0.65615588
  0.34880000  -0.65615411
  0.34880000   0.65615587
  0.34880000  -0.65615411
  0.34880000   0.65615587
  0.34880000  -0.65615411
  0.34880000   0.65615587
  0.34880000  -0.65615411
  0.34880000   0.65615587
  0.34880000  -0.65615411
  0.34880000   0.65615587
  0.34880000  -0.65615412
  0.34880000   0.65615587
  0.34880000  -0.65615412
  0.34880000   0.65615586
  0.34880000  -0.65615412
  0.34880000   0.65615586
  0.34880000  -0.65615412
  0.34880000   0.65615586
  0.34880000  -0.65615412
  0.34880000   0.65615586
  0.34880000  -0.65615413
  0.34880000   0.65615586
  0.34960000  -0.65596643
  0.34960000   0.65596822
  0.34960000  -0.65596643
  0.34960000   0.65596822
  0.34960000  -0.65596643
  0.34960000   0.65596822
  0.34960000  -0.65596643
  0.34960000   0.65596822
  0.34960000  -0.65596643
  0.34960000   0.65596821
  0.34960000  -0.65596644
  0.34960000   0.65596821
  0.34960000  -0.65596644
  0.34960000   0.65596821
  0.34960000  -0.65596644
  0.34960000   0.65596821
  0.34960000  -0.65596644
  0.34960000   0.65596821
  0.34960000  -0.65596644
  0.34960000   0.65596820
  0.34960000  -0.65596644
  0.34960000   0.65596820
  0.34960000  -0.65596645
  0.34960000   0.65596820
  0.34960000  -0.65596645
  0.34960000   0.65596820
  0.34960000  -0.65596645
  0.34960000   0.65596820
  0.34960000  -0.65596645
  0.34960000   0.65596820
  0.34960000  -0.65596645
  0.34960000   0.65596819
  0.34960000  -0.65596646
  0.34960000   0.65596819
  0.34960000  -0.65596646
  0.34960000   0.65596819
  0.34960000  -0.65596646
  0.34960000   0.65596819
  0.34960000  -0.65596646
  0.34960000   0.65596819
  0.35040000  -0.65577853
  0.35040000   0.65578032
  0.35040000  -0.65577853
  0.35040000   0.65578031
  0.35040000  -0.65577853
  0.35040000   0.65578031
  0.35040000  -0.65577853
  0.35040000   0.65578031
  0.35040000  -0.65577854
  0.35040000   0.65578031
  0.35040000  -0.65577854
  0.35040000   0.65578031
  0.35040000  -0.65577854
  0.35040000   0.65578031
  0.35040000  -0.65577854
  0.35040000   0.65578030
  0.35040000  -0.65577854
  0.35040000   0.65578030
  0.35040000  -0.65577854
  0.35040000   0.65578030
  0.35040000  -0.65577855
  0.35040000   0.65578030
  0.35040000  -0.65577855
  0.35040000   0.65578030
  0.35040000  -0.65577855
  0.35040000   0.65578030
  0.35040000  -0.65577855
  0.35040000   0.65578029
  0.35040000  -0.65577855
  0.35040000   0.65578029
  0.35040000  -0.65577856
  0.35040000   0.65578029
  0.35040000  -0.65577856
  0.35040000   0.65578029
  0.35040000  -0.65577856
  0.35040000   0.65578029
  0.35040000  -0.65577856
  0.35040000   0.65578028
  0.35040000  -0.65577856
  0.35040000   0.65578028
  0.35120000  -0.65559040
  0.35120000   0.65559218
  0.35120000  -0.65559040
  0.35120000   0.65559218
  0.35120000  -0.65559040
  0.35120000   0.65559218
  0.35120000  -0.65559040
  0.35120000   0.65559217
  0.35120000  -0.65559040
  0.35120000   0.65559217
  0.35120000  -0.65559041
  0.35120000   0.65559217
  0.35120000  -0.65559041
  0.35120000   0.65559217
  0.35120000  -0.65559041
  0.35120000   0.65559217
  0.35120000  -0.65559041
  0.35120000   0.65559216
  0.35120000  -0.65559041
  0.35120000   0.65559216
  0.35120000  -0.65559041
  0.35120000   0.65559216
  0.35120000  -0.65559042
  0.35120000   0.65559216
  0.35120000  -0.65559042
  0.35120000   0.65559216
  0.35120000  -0.65559042
  0.35120000   0.65559216
  0.35120000  -0.65559042
  0.35120000   0.65559215
  0.35120000  -0.65559042
  0.35120000   0.65559215
  0.35120000  -0.65559043
  0.35120000   0.65559215
  0.35120000  -0.65559043
  0.35120000   0.65559215
  0.35120000  -0.65559043
  0.35120000   0.65559215
  0.35120000  -0.65559043
  0.35120000   0.65559215
  0.35200000  -0.65540203
  0.35200000   0.65540381
  0.35200000  -0.65540203
  0.35200000   0.65540381
  0.35200000  -0.65540203
  0.35200000   0.65540380
  0.35200000  -0.65540204
  0.35200000   0.65540380
  0.35200000  -0.65540204
  0.35200000   0.65540380
  0.35200000  -0.65540204
  0.35200000   0.65540380
  0.35200000  -0.65540204
  0.35200000   0.65540380
  0.35200000  -0.65540204
  0.35200000   0.65540379
  0.35200000  -0.65540205
  0.35200000   0.65540379
  0.35200000  -0.65540205
  0.35200000   0.65540379
  0.35200000  -0.65540205
  0.35200000   0.65540379
  0.35200000  -0.65540205
  0.35200000   0.65540379
  0.35200000  -0.65540205
  0.35200000   0.65540379
  0.35200000  -0.65540205
  0.35200000   0.65540378
  0.35200000  -0.65540206
  0.35200000   0.65540378
  0.35200000  -0.65540206
  0.35200000   0.65540378
  0.35200000  -0.65540206
  0.35200000   0.65540378
  0.35200000  -0.65540206
  0.35200000   0.65540378
  0.35200000  -0.65540206
  0.35200000   0.65540378
  0.35200000  -0.65540206
  0.35200000   0.65540377
  0.35280000  -0.65521343
  0.35280000   0.65521520
  0.35280000  -0.65521343
  0.35280000   0.65521520
  0.35280000  -0.65521343
  0.35280000   0.65521520
  0.35280000  -0.65521344
  0.35280000   0.65521519
  0.35280000  -0.65521344
  0.35280000   0.65521519
  0.35280000  -0.65521344
  0.35280000   0.65521519
  0.35280000  -0.65521344
  0.35280000   0.65521519
  0.35280000  -0.65521344
  0.35280000   0.65521519
  0.35280000  -0.65521344
  0.35280000   0.65521519
  0.35280000  -0.65521345
  0.35280000   0.65521518
  0.35280000  -0.65521345
  0.35280000   0.65521518
  0.35280000  -0.65521345
  0.35280000   0.65521518
  0.35280000  -0.65521345
  0.35280000   0.65521518
  0.35280000  -0.65521345
  0.35280000   0.65521518
  0.35280000  -0.65521345
  0.35280000   0.65521518
  0.35280000  -0.65521346
  0.35280000   0.65521517
  0.35280000  -0.65521346
  0.35280000   0.65521517
  0.35280000  -0.65521346
  0.35280000   0.65521517
  0.35280000  -0.65521346
  0.35280000   0.65521517
  0.35280000  -0.65521346
  0.35280000   0.65521517
  0.35360000  -0.65502459
  0.35360000   0.65502636
  0.35360000  -0.65502460
  0.35360000   0.65502636
  0.35360000  -0.65502460
  0.35360000   0.65502635
  0.35360000  -0.65502460
  0.35360000   0.65502635
  0.35360000  -0.65502460
  0.35360000   0.65502635
  0.35360000  -0.65502460
  0.35360000   0.65502635
  0.35360000  -0.65502461
  0.35360000   0.65502635
  0.35360000  -0.65502461
  0.35360000   0.65502635
  0.35360000  -0.65502461
  0.35360000   0.65502634
  0.35360000  -0.65502461
  0.35360000   0.65502634
  0.35360000  -0.65502461
  0.35360000   0.65502634
  0.35360000  -0.65502461
  0.35360000   0.65502634
  0.35360000  -0.65502462
  0.35360000   0.65502634
  0.35360000  -0.65502462
  0.35360000   0.65502634
  0.35360000  -0.65502462
  0.35360000   0.65502633
  0.35360000  -0.65502462
  0.35360000   0.65502633
  0.35360000  -0.65502462
  0.35360000   0.65502633
  0.35360000  -0.65502462
  0.35360000   0.65502633
  0.35360000  -0.65502463
  0.35360000   0.65502633
  0.35360000  -0.65502463
  0.35360000   0.65502633
  0.35440000  -0.65483552
  0.35440000   0.65483728
  0.35440000  -0.65483552
  0.35440000   0.65483728
  0.35440000  -0.65483553
  0.35440000   0.65483728
  0.35440000  -0.65483553
  0.35440000   0.65483728
  0.35440000  -0.65483553
  0.35440000   0.65483727
  0.35440000  -0.65483553
  0.35440000   0.65483727
  0.35440000  -0.65483553
  0.35440000   0.65483727
  0.35440000  -0.65483554
  0.35440000   0.65483727
  0.35440000  -0.65483554
  0.35440000   0.65483727
  0.35440000  -0.65483554
  0.35440000   0.65483727
  0.35440000  -0.65483554
  0.35440000   0.65483726
  0.35440000  -0.65483554
  0.35440000   0.65483726
  0.35440000  -0.65483554
  0.35440000   0.65483726
  0.35440000  -0.65483555
  0.35440000   0.65483726
  0.35440000  -0.65483555
  0.35440000   0.65483726
  0.35440000  -0.65483555
  0.35440000   0.65483726
  0.35440000  -0.65483555
  0.35440000   0.65483725
  0.35440000  -0.65483555
  0.35440000   0.65483725
  0.35440000  -0.65483555
  0.35440000   0.65483725
  0.35440000  -0.65483556
  0.35440000   0.65483725
  0.35520000  -0.65464622
  0.35520000   0.65464797
  0.35520000  -0.65464622
  0.35520000   0.65464797
  0.35520000  -0.65464622
  0.35520000   0.65464796
  0.35520000  -0.65464622
  0.35520000   0.65464796
  0.35520000  -0.65464622
  0.35520000   0.65464796
  0.35520000  -0.65464622
  0.35520000   0.65464796
  0.35520000  -0.65464623
  0.35520000   0.65464796
  0.35520000  -0.65464623
  0.35520000   0.65464796
  0.35520000  -0.65464623
  0.35520000   0.65464795
  0.35520000  -0.65464623
  0.35520000   0.65464795
  0.35520000  -0.65464623
  0.35520000   0.65464795
  0.35520000  -0.65464623
  0.35520000   0.65464795
  0.35520000  -0.65464624
  0.35520000   0.65464795
  0.35520000  -0.65464624
  0.35520000   0.65464795
  0.35520000  -0.65464624
  0.35520000   0.65464794
  0.35520000  -0.65464624
  0.35520000   0.65464794
  0.35520000  -0.65464624
  0.35520000   0.65464794
  0.35520000  -0.65464625
  0.35520000   0.65464794
  0.35520000  -0.65464625
  0.35520000   0.65464794
  0.35520000  -0.65464625
  0.35520000   0.65464794
  0.35600000  -0.65445667
  0.35600000   0.65445842
  0.35600000  -0.65445667
  0.35600000   0.65445842
  0.35600000  -0.65445668
  0.35600000   0.65445841
  0.35600000  -0.65445668
  0.35600000   0.65445841
  0.35600000  -0.65445668
  0.35600000   0.65445841
  0.35600000  -0.65445668
  0.35600000   0.65445841
  0.35600000  -0.65445668
  0.35600000   0.65445841
  0.35600000  -0.65445668
  0.35600000   0.65445841
  0.35600000  -0.65445669
  0.35600000   0.65445840
  0.35600000  -0.65445669
  0.35600000   0.65445840
  0.35600000  -0.65445669
  0.35600000   0.65445840
  0.35600000  -0.65445669
  0.35600000   0.65445840
  0.35600000  -0.65445669
  0.35600000   0.65445840
  0.35600000  -0.65445669
  0.35600000   0.65445840
  0.35600000  -0.65445670
  0.35600000   0.65445839
  0.35600000  -0.65445670
  0.35600000   0.65445839
  0.35600000  -0.65445670
  0.35600000   0.65445839
  0.35600000  -0.65445670
  0.35600000   0.65445839
  0.35600000  -0.65445670
  0.35600000   0.65445839
  0.35600000  -0.65445670
  0.35600000   0.65445839
  0.35680000  -0.65426689
  0.35680000   0.65426863
  0.35680000  -0.65426689
  0.35680000   0.65426863
  0.35680000  -0.65426689
  0.35680000   0.65426863
  0.35680000  -0.65426690
  0.35680000   0.65426863
  0.35680000  -0.65426690
  0.35680000   0.65426862
  0.35680000  -0.65426690
  0.35680000   0.65426862
  0.35680000  -0.65426690
  0.35680000   0.65426862
  0.35680000  -0.65426690
  0.35680000   0.65426862
  0.35680000  -0.65426690
  0.35680000   0.65426862
  0.35680000  -0.65426691
  0.35680000   0.65426862
  0.35680000  -0.65426691
  0.35680000   0.65426861
  0.35680000  -0.65426691
  0.35680000   0.65426861
  0.35680000  -0.65426691
  0.35680000   0.65426861
  0.35680000  -0.65426691
  0.35680000   0.65426861
  0.35680000  -0.65426691
  0.35680000   0.65426861
  0.35680000  -0.65426692
  0.35680000   0.65426861
  0.35680000  -0.65426692
  0.35680000   0.65426860
  0.35680000  -0.65426692
  0.35680000   0.65426860
  0.35680000  -0.65426692
  0.35680000   0.65426860
  0.35680000  -0.65426692
  0.35680000   0.65426860
  0.35760000  -0.65407687
  0.35760000   0.65407861
  0.35760000  -0.65407687
  0.35760000   0.65407861
  0.35760000  -0.65407688
  0.35760000   0.65407860
  0.35760000  -0.65407688
  0.35760000   0.65407860
  0.35760000  -0.65407688
  0.35760000   0.65407860
  0.35760000  -0.65407688
  0.35760000   0.65407860
  0.35760000  -0.65407688
  0.35760000   0.65407860
  0.35760000  -0.65407688
  0.35760000   0.65407859
  0.35760000  -0.65407689
  0.35760000   0.65407859
  0.35760000  -0.65407689
  0.35760000   0.65407859
  0.35760000  -0.65407689
  0.35760000   0.65407859
  0.35760000  -0.65407689
  0.35760000   0.65407859
  0.35760000  -0.65407689
  0.35760000   0.65407859
  0.35760000  -0.65407689
  0.35760000   0.65407858
  0.35760000  -0.65407690
  0.35760000   0.65407858
  0.35760000  -0.65407690
  0.35760000   0.65407858
  0.35760000  -0.65407690
  0.35760000   0.65407858
  0.35760000  -0.65407690
  0.35760000   0.65407858
  0.35760000  -0.65407690
  0.35760000   0.65407858
  0.35760000  -0.65407690
  0.35760000   0.65407857
  0.35840000  -0.65388662
  0.35840000   0.65388834
  0.35840000  -0.65388662
  0.35840000   0.65388834
  0.35840000  -0.65388662
  0.35840000   0.65388834
  0.35840000  -0.65388662
  0.35840000   0.65388834
  0.35840000  -0.65388662
  0.35840000   0.65388834
  0.35840000  -0.65388662
  0.35840000   0.65388834
  0.35840000  -0.65388663
  0.35840000   0.65388833
  0.35840000  -0.65388663
  0.35840000   0.65388833
  0.35840000  -0.65388663
  0.35840000   0.65388833
  0.35840000  -0.65388663
  0.35840000   0.65388833
  0.35840000  -0.65388663
  0.35840000   0.65388833
  0.35840000  -0.65388663
  0.35840000   0.65388833
  0.35840000  -0.65388664
  0.35840000   0.65388832
  0.35840000  -0.65388664
  0.35840000   0.65388832
  0.35840000  -0.65388664
  0.35840000   0.65388832
  0.35840000  -0.65388664
  0.35840000   0.65388832
  0.35840000  -0.65388664
  0.35840000   0.65388832
  0.35840000  -0.65388664
  0.35840000   0.65388832
  0.35840000  -0.65388665
  0.35840000   0.65388831
  0.35840000  -0.65388665
  0.35840000   0.65388831
  0.35920000  -0.65369612
  0.35920000   0.65369784
  0.35920000  -0.65369612
  0.35920000   0.65369784
  0.35920000  -0.65369612
  0.35920000   0.65369784
  0.35920000  -0.65369613
  0.35920000   0.65369784
  0.35920000  -0.65369613
  0.35920000   0.65369784
  0.35920000  -0.65369613
  0.35920000   0.65369784
  0.35920000  -0.65369613
  0.35920000   0.65369783
  0.35920000  -0.65369613
  0.35920000   0.65369783
  0.35920000  -0.65369613
  0.35920000   0.65369783
  0.35920000  -0.65369614
  0.35920000   0.65369783
  0.35920000  -0.65369614
  0.35920000   0.65369783
  0.35920000  -0.65369614
  0.35920000   0.65369783
  0.35920000  -0.65369614
  0.35920000   0.65369782
  0.35920000  -0.65369614
  0.35920000   0.65369782
  0.35920000  -0.65369615
  0.35920000   0.65369782
  0.35920000  -0.65369615
  0.35920000   0.65369782
  0.35920000  -0.65369615
  0.35920000   0.65369782
  0.35920000  -0.65369615
  0.35920000   0.65369782
  0.35920000  -0.65369615
  0.35920000   0.65369781
  0.35920000  -0.65369615
  0.35920000   0.65369781
  0.36000000  -0.65350539
  0.36000000   0.65350710
  0.36000000  -0.65350539
  0.36000000   0.65350710
  0.36000000  -0.65350539
  0.36000000   0.65350710
  0.36000000  -0.65350539
  0.36000000   0.65350710
  0.36000000  -0.65350539
  0.36000000   0.65350710
  0.36000000  -0.65350540
  0.36000000   0.65350710
  0.36000000  -0.65350540
  0.36000000   0.65350709
  0.36000000  -0.65350540
  0.36000000   0.65350709
  0.36000000  -0.65350540
  0.36000000   0.65350709
  0.36000000  -0.65350540
  0.36000000   0.65350709
  0.36000000  -0.65350540
  0.36000000   0.65350709
  0.36000000  -0.65350541
  0.36000000   0.65350709
  0.36000000  -0.65350541
  0.36000000   0.65350708
  0.36000000  -0.65350541
  0.36000000   0.65350708
  0.36000000  -0.65350541
  0.36000000   0.65350708
  0.36000000  -0.65350541
  0.36000000   0.65350708
  0.36000000  -0.65350541
  0.36000000   0.65350708
  0.36000000  -0.65350542
  0.36000000   0.65350708
  0.36000000  -0.65350542
  0.36000000   0.65350707
  0.36000000  -0.65350542
  0.36000000   0.65350707
  0.36080000  -0.65331441
  0.36080000   0.65331613
  0.36080000  -0.65331442
  0.36080000   0.65331612
  0.36080000  -0.65331442
  0.36080000   0.65331612
  0.36080000  -0.65331442
  0.36080000   0.65331612
  0.36080000  -0.65331442
  0.36080000   0.65331612
  0.36080000  -0.65331442
  0.36080000   0.65331612
  0.36080000  -0.65331442
  0.36080000   0.65331612
  0.36080000  -0.65331443
  0.36080000   0.65331611
  0.36080000  -0.65331443
  0.36080000   0.65331611
  0.36080000  -0.65331443
  0.36080000   0.65331611
  0.36080000  -0.65331443
  0.36080000   0.65331611
  0.36080000  -0.65331443
  0.36080000   0.65331611
  0.36080000  -0.65331443
  0.36080000   0.65331611
  0.36080000  -0.65331444
  0.36080000   0.65331610
  0.36080000  -0.65331444
  0.36080000   0.65331610
  0.36080000  -0.65331444
  0.36080000   0.65331610
  0.36080000  -0.65331444
  0.36080000   0.65331610
  0.36080000  -0.65331444
  0.36080000   0.65331610
  0.36080000  -0.65331444
  0.36080000   0.65331610
  0.36080000  -0.65331445
  0.36080000   0.65331609
  0.36160000  -0.65312320
  0.36160000   0.65312491
  0.36160000  -0.65312320
  0.36160000   0.65312491
  0.36160000  -0.65312321
  0.36160000   0.65312490
  0.36160000  -0.65312321
  0.36160000   0.65312490
  0.36160000  -0.65312321
  0.36160000   0.65312490
  0.36160000  -0.65312321
  0.36160000   0.65312490
  0.36160000  -0.65312321
  0.36160000   0.65312490
  0.36160000  -0.65312321
  0.36160000   0.65312490
  0.36160000  -0.65312322
  0.36160000   0.65312489
  0.36160000  -0.65312322
  0.36160000   0.65312489
  0.36160000  -0.65312322
  0.36160000   0.65312489
  0.36160000  -0.65312322
  0.36160000   0.65312489
  0.36160000  -0.65312322
  0.36160000   0.65312489
  0.36160000  -0.65312322
  0.36160000   0.65312489
  0.36160000  -0.65312323
  0.36160000   0.65312488
  0.36160000  -0.65312323
  0.36160000   0.65312488
  0.36160000  -0.65312323
  0.36160000   0.65312488
  0.36160000  -0.65312323
  0.36160000   0.65312488
  0.36160000  -0.65312323
  0.36160000   0.65312488
  0.36160000  -0.65312323
  0.36160000   0.65312488
  0.36240000  -0.65293175
  0.36240000   0.65293345
  0.36240000  -0.65293175
  0.36240000   0.65293345
  0.36240000  -0.65293175
  0.36240000   0.65293345
  0.36240000  -0.65293175
  0.36240000   0.65293344
  0.36240000  -0.65293176
  0.36240000   0.65293344
  0.36240000  -0.65293176
  0.36240000   0.65293344
  0.36240000  -0.65293176
  0.36240000   0.65293344
  0.36240000  -0.65293176
  0.36240000   0.65293344
  0.36240000  -0.65293176
  0.36240000   0.65293343
  0.36240000  -0.65293176
  0.36240000   0.65293343
  0.36240000  -0.65293177
  0.36240000   0.65293343
  0.36240000  -0.65293177
  0.36240000   0.65293343
  0.36240000  -0.65293177
  0.36240000   0.65293343
  0.36240000  -0.65293177
  0.36240000   0.65293343
  0.36240000  -0.65293177
  0.36240000   0.65293342
  0.36240000  -0.65293177
  0.36240000   0.65293342
  0.36240000  -0.65293178
  0.36240000   0.65293342
  0.36240000  -0.65293178
  0.36240000   0.65293342
  0.36240000  -0.65293178
  0.36240000   0.65293342
  0.36240000  -0.65293178
  0.36240000   0.65293342
  0.36320000  -0.65274005
  0.36320000   0.65274175
  0.36320000  -0.65274006
  0.36320000   0.65274175
  0.36320000  -0.65274006
  0.36320000   0.65274175
  0.36320000  -0.65274006
  0.36320000   0.65274174
  0.36320000  -0.65274006
  0.36320000   0.65274174
  0.36320000  -0.65274006
  0.36320000   0.65274174
  0.36320000  -0.65274006
  0.36320000   0.65274174
  0.36320000  -0.65274007
  0.36320000   0.65274174
  0.36320000  -0.65274007
  0.36320000   0.65274174
  0.36320000  -0.65274007
  0.36320000   0.65274173
  0.36320000  -0.65274007
  0.36320000   0.65274173
  0.36320000  -0.65274007
  0.36320000   0.65274173
  0.36320000  -0.65274008
  0.36320000   0.65274173
  0.36320000  -0.65274008
  0.36320000   0.65274173
  0.36320000  -0.65274008
  0.36320000   0.65274173
  0.36320000  -0.65274008
  0.36320000   0.65274172
  0.36320000  -0.65274008
  0.36320000   0.65274172
  0.36320000  -0.65274008
  0.36320000   0.65274172
  0.36320000  -0.65274008
  0.36320000   0.65274172
  0.36320000  -0.65274009
  0.36320000   0.65274172
  0.36400000  -0.65254812
  0.36400000   0.65254981
  0.36400000  -0.65254812
  0.36400000   0.65254981
  0.36400000  -0.65254812
  0.36400000   0.65254980
  0.36400000  -0.65254812
  0.36400000   0.65254980
  0.36400000  -0.65254813
  0.36400000   0.65254980
  0.36400000  -0.65254813
  0.36400000   0.65254980
  0.36400000  -0.65254813
  0.36400000   0.65254980
  0.36400000  -0.65254813
  0.36400000   0.65254980
  0.36400000  -0.65254813
  0.36400000   0.65254979
  0.36400000  -0.65254813
  0.36400000   0.65254979
  0.36400000  -0.65254814
  0.36400000   0.65254979
  0.36400000  -0.65254814
  0.36400000   0.65254979
  0.36400000  -0.65254814
  0.36400000   0.65254979
  0.36400000  -0.65254814
  0.36400000   0.65254979
  0.36400000  -0.65254814
  0.36400000   0.65254978
  0.36400000  -0.65254814
  0.36400000   0.65254978
  0.36400000  -0.65254815
  0.36400000   0.65254978
  0.36400000  -0.65254815
  0.36400000   0.65254978
  0.36400000  -0.65254815
  0.36400000   0.65254978
  0.36400000  -0.65254815
  0.36400000   0.65254978
  0.36480000  -0.65235594
  0.36480000   0.65235763
  0.36480000  -0.65235594
  0.36480000   0.65235762
  0.36480000  -0.65235595
  0.36480000   0.65235762
  0.36480000  -0.65235595
  0.36480000   0.65235762
  0.36480000  -0.65235595
  0.36480000   0.65235762
  0.36480000  -0.65235595
  0.36480000   0.65235762
  0.36480000  -0.65235595
  0.36480000   0.65235762
  0.36480000  -0.65235595
  0.36480000   0.65235761
  0.36480000  -0.65235596
  0.36480000   0.65235761
  0.36480000  -0.65235596
  0.36480000   0.65235761
  0.36480000  -0.65235596
  0.36480000   0.65235761
  0.36480000  -0.65235596
  0.36480000   0.65235761
  0.36480000  -0.65235596
  0.36480000   0.65235761
  0.36480000  -0.65235596
  0.36480000   0.65235760
  0.36480000  -0.65235597
  0.36480000   0.65235760
  0.36480000  -0.65235597
  0.36480000   0.65235760
  0.36480000  -0.65235597
  0.36480000   0.65235760
  0.36480000  -0.65235597
  0.36480000   0.65235760
  0.36480000  -0.65235597
  0.36480000   0.65235760
  0.36480000  -0.65235597
  0.36480000   0.65235759
  0.36560000  -0.65216352
  0.36560000   0.65216520
  0.36560000  -0.65216353
  0.36560000   0.65216520
  0.36560000  -0.65216353
  0.36560000   0.65216520
  0.36560000  -0.65216353
  0.36560000   0.65216520
  0.36560000  -0.65216353
  0.36560000   0.65216519
  0.36560000  -0.65216353
  0.36560000   0.65216519
  0.36560000  -0.65216353
  0.36560000   0.65216519
  0.36560000  -0.65216354
  0.36560000   0.65216519
  0.36560000  -0.65216354
  0.36560000   0.65216519
  0.36560000  -0.65216354
  0.36560000   0.65216519
  0.36560000  -0.65216354
  0.36560000   0.65216518
  0.36560000  -0.65216354
  0.36560000   0.65216518
  0.36560000  -0.65216354
  0.36560000   0.65216518
  0.36560000  -0.65216355
  0.36560000   0.65216518
  0.36560000  -0.65216355
  0.36560000   0.65216518
  0.36560000  -0.65216355
  0.36560000   0.65216518
  0.36560000  -0.65216355
  0.36560000   0.65216517
  0.36560000  -0.65216355
  0.36560000   0.65216517
  0.36560000  -0.65216355
  0.36560000   0.65216517
  0.36560000  -0.65216356
  0.36560000   0.65216517
  0.36640000  -0.65197086
  0.36640000   0.65197253
  0.36640000  -0.65197086
  0.36640000   0.65197253
  0.36640000  -0.65197087
  0.36640000   0.65197253
  0.36640000  -0.65197087
  0.36640000   0.65197253
  0.36640000  -0.65197087
  0.36640000   0.65197253
  0.36640000  -0.65197087
  0.36640000   0.65197252
  0.36640000  -0.65197087
  0.36640000   0.65197252
  0.36640000  -0.65197087
  0.36640000   0.65197252
  0.36640000  -0.65197088
  0.36640000   0.65197252
  0.36640000  -0.65197088
  0.36640000   0.65197252
  0.36640000  -0.65197088
  0.36640000   0.65197252
  0.36640000  -0.65197088
  0.36640000   0.65197251
  0.36640000  -0.65197088
  0.36640000   0.65197251
  0.36640000  -0.65197088
  0.36640000   0.65197251
  0.36640000  -0.65197089
  0.36640000   0.65197251
  0.36640000  -0.65197089
  0.36640000   0.65197251
  0.36640000  -0.65197089
  0.36640000   0.65197251
  0.36640000  -0.65197089
  0.36640000   0.65197250
  0.36640000  -0.65197089
  0.36640000   0.65197250
  0.36640000  -0.65197089
  0.36640000   0.65197250
  0.36720000  -0.65177796
  0.36720000   0.65177962
  0.36720000  -0.65177796
  0.36720000   0.65177962
  0.36720000  -0.65177796
  0.36720000   0.65177962
  0.36720000  -0.65177796
  0.36720000   0.65177962
  0.36720000  -0.65177796
  0.36720000   0.65177962
  0.36720000  -0.65177797
  0.36720000   0.65177961
  0.36720000  -0.65177797
  0.36720000   0.65177961
  0.36720000  -0.65177797
  0.36720000   0.65177961
  0.36720000  -0.65177797
  0.36720000   0.65177961
  0.36720000  -0.65177797
  0.36720000   0.65177961
  0.36720000  -0.65177797
  0.36720000   0.65177961
  0.36720000  -0.65177798
  0.36720000   0.65177960
  0.36720000  -0.65177798
  0.36720000   0.65177960
  0.36720000  -0.65177798
  0.36720000   0.65177960
  0.36720000  -0.65177798
  0.36720000   0.65177960
  0.36720000  -0.65177798
  0.36720000   0.65177960
  0.36720000  -0.65177798
  0.36720000   0.65177960
  0.36720000  -0.65177799
  0.36720000   0.65177959
  0.36720000  -0.65177799
  0.36720000   0.65177959
  0.36720000  -0.65177799
  0.36720000   0.65177959
  0.36800000  -0.65158481
  0.36800000   0.65158647
  0.36800000  -0.65158481
  0.36800000   0.65158647
  0.36800000  -0.65158481
  0.36800000   0.65158646
  0.36800000  -0.65158481
  0.36800000   0.65158646
  0.36800000  -0.65158482
  0.36800000   0.65158646
  0.36800000  -0.65158482
  0.36800000   0.65158646
  0.36800000  -0.65158482
  0.36800000   0.65158646
  0.36800000  -0.65158482
  0.36800000   0.65158646
  0.36800000  -0.65158482
  0.36800000   0.65158645
  0.36800000  -0.65158482
  0.36800000   0.65158645
  0.36800000  -0.65158482
  0.36800000   0.65158645
  0.36800000  -0.65158483
  0.36800000   0.65158645
  0.36800000  -0.65158483
  0.36800000   0.65158645
  0.36800000  -0.65158483
  0.36800000   0.65158645
  0.36800000  -0.65158483
  0.36800000   0.65158644
  0.36800000  -0.65158483
  0.36800000   0.65158644
  0.36800000  -0.65158483
  0.36800000   0.65158644
  0.36800000  -0.65158484
  0.36800000   0.65158644
  0.36800000  -0.65158484
  0.36800000   0.65158644
  0.36800000  -0.65158484
  0.36800000   0.65158644
  0.36880000  -0.65139142
  0.36880000   0.65139307
  0.36880000  -0.65139142
  0.36880000   0.65139307
  0.36880000  -0.65139142
  0.36880000   0.65139307
  0.36880000  -0.65139142
  0.36880000   0.65139306
  0.36880000  -0.65139142
  0.36880000   0.65139306
  0.36880000  -0.65139142
  0.36880000   0.65139306
  0.36880000  -0.65139143
  0.36880000   0.65139306
  0.36880000  -0.65139143
  0.36880000   0.65139306
  0.36880000  -0.65139143
  0.36880000   0.65139306
  0.36880000  -0.65139143
  0.36880000   0.65139305
  0.36880000  -0.65139143
  0.36880000   0.65139305
  0.36880000  -0.65139143
  0.36880000   0.65139305
  0.36880000  -0.65139144
  0.36880000   0.65139305
  0.36880000  -0.65139144
  0.36880000   0.65139305
  0.36880000  -0.65139144
  0.36880000   0.65139305
  0.36880000  -0.65139144
  0.36880000   0.65139304
  0.36880000  -0.65139144
  0.36880000   0.65139304
  0.36880000  -0.65139144
  0.36880000   0.65139304
  0.36880000  -0.65139145
  0.36880000   0.65139304
  0.36880000  -0.65139145
  0.36880000   0.65139304
  0.36960000  -0.65119778
  0.36960000   0.65119943
  0.36960000  -0.65119778
  0.36960000   0.65119942
  0.36960000  -0.65119778
  0.36960000   0.65119942
  0.36960000  -0.65119778
  0.36960000   0.65119942
  0.36960000  -0.65119778
  0.36960000   0.65119942
  0.36960000  -0.65119779
  0.36960000   0.65119942
  0.36960000  -0.65119779
  0.36960000   0.65119942
  0.36960000  -0.65119779
  0.36960000   0.65119941
  0.36960000  -0.65119779
  0.36960000   0.65119941
  0.36960000  -0.65119779
  0.36960000   0.65119941
  0.36960000  -0.65119779
  0.36960000   0.65119941
  0.36960000  -0.65119780
  0.36960000   0.65119941
  0.36960000  -0.65119780
  0.36960000   0.65119941
  0.36960000  -0.65119780
  0.36960000   0.65119941
  0.36960000  -0.65119780
  0.36960000   0.65119940
  0.36960000  -0.65119780
  0.36960000   0.65119940
  0.36960000  -0.65119780
  0.36960000   0.65119940
  0.36960000  -0.65119781
  0.36960000   0.65119940
  0.36960000  -0.65119781
  0.36960000   0.65119940
  0.36960000  -0.65119781
  0.36960000   0.65119940
  0.37040000  -0.65100390
  0.37040000   0.65100554
  0.37040000  -0.65100390
  0.37040000   0.65100554
  0.37040000  -0.65100390
  0.37040000   0.65100553
  0.37040000  -0.65100390
  0.37040000   0.65100553
  0.37040000  -0.65100390
  0.37040000   0.65100553
  0.37040000  -0.65100390
  0.37040000   0.65100553
  0.37040000  -0.65100391
  0.37040000   0.65100553
  0.37040000  -0.65100391
  0.37040000   0.65100553
  0.37040000  -0.65100391
  0.37040000   0.65100552
  0.37040000  -0.65100391
  0.37040000   0.65100552
  0.37040000  -0.65100391
  0.37040000   0.65100552
  0.37040000  -0.65100391
  0.37040000   0.65100552
  0.37040000  -0.65100392
  0.37040000   0.65100552
  0.37040000  -0.65100392
  0.37040000   0.65100552
  0.37040000  -0.65100392
  0.37040000   0.65100552
  0.37040000  -0.65100392
  0.37040000   0.65100551
  0.37040000  -0.65100392
  0.37040000   0.65100551
  0.37040000  -0.65100392
  0.37040000   0.65100551
  0.37040000  -0.65100392
  0.37040000   0.65100551
  0.37040000  -0.65100393
  0.37040000   0.65100551
  0.37120000  -0.65080977
  0.37120000   0.65081140
  0.37120000  -0.65080977
  0.37120000   0.65081140
  0.37120000  -0.65080977
  0.37120000   0.65081140
  0.37120000  -0.65080977
  0.37120000   0.65081140
  0.37120000  -0.65080977
  0.37120000   0.65081140
  0.37120000  -0.65080978
  0.37120000   0.65081140
  0.37120000  -0.65080978
  0.37120000   0.65081139
  0.37120000  -0.65080978
  0.37120000   0.65081139
  0.37120000  -0.65080978
  0.37120000   0.65081139
  0.37120000  -0.65080978
  0.37120000   0.65081139
  0.37120000  -0.65080978
  0.37120000   0.65081139
  0.37120000  -0.65080979
  0.37120000   0.65081139
  0.37120000  -0.65080979
  0.37120000   0.65081138
  0.37120000  -0.65080979
  0.37120000   0.65081138
  0.37120000  -0.65080979
  0.37120000   0.65081138
  0.37120000  -0.65080979
  0.37120000   0.65081138
  0.37120000  -0.65080979
  0.37120000   0.65081138
  0.37120000  -0.65080979
  0.37120000   0.65081138
  0.37120000  -0.65080980
  0.37120000   0.65081138
  0.37120000  -0.65080980
  0.37120000   0.65081137
  0.37200000  -0.65061539
  0.37200000   0.65061702
  0.37200000  -0.65061539
  0.37200000   0.65061702
  0.37200000  -0.65061540
  0.37200000   0.65061702
  0.37200000  -0.65061540
  0.37200000   0.65061702
  0.37200000  -0.65061540
  0.37200000   0.65061702
  0.37200000  -0.65061540
  0.37200000   0.65061702
  0.37200000  -0.65061540
  0.37200000   0.65061701
  0.37200000  -0.65061540
  0.37200000   0.65061701
  0.37200000  -0.65061541
  0.37200000   0.65061701
  0.37200000  -0.65061541
  0.37200000   0.65061701
  0.37200000  -0.65061541
  0.37200000   0.65061701
  0.37200000  -0.65061541
  0.37200000   0.65061701
  0.37200000  -0.65061541
  0.37200000   0.65061700
  0.37200000  -0.65061541
  0.37200000   0.65061700
  0.37200000  -0.65061542
  0.37200000   0.65061700
  0.37200000  -0.65061542
  0.37200000   0.65061700
  0.37200000  -0.65061542
  0.37200000   0.65061700
  0.37200000  -0.65061542
  0.37200000   0.65061700
  0.37200000  -0.65061542
  0.37200000   0.65061700
  0.37200000  -0.65061542
  0.37200000   0.65061699
  0.37280000  -0.65042077
  0.37280000   0.65042240
  0.37280000  -0.65042077
  0.37280000   0.65042240
  0.37280000  -0.65042078
  0.37280000   0.65042239
  0.37280000  -0.65042078
  0.37280000   0.65042239
  0.37280000  -0.65042078
  0.37280000   0.65042239
  0.37280000  -0.65042078
  0.37280000   0.65042239
  0.37280000  -0.65042078
  0.37280000   0.65042239
  0.37280000  -0.65042078
  0.37280000   0.65042239
  0.37280000  -0.65042079
  0.37280000   0.65042238
  0.37280000  -0.65042079
  0.37280000   0.65042238
  0.37280000  -0.65042079
  0.37280000   0.65042238
  0.37280000  -0.65042079
  0.37280000   0.65042238
  0.37280000  -0.65042079
  0.37280000   0.65042238
  0.37280000  -0.65042079
  0.37280000   0.65042238
  0.37280000  -0.65042079
  0.37280000   0.65042238
  0.37280000  -0.65042080
  0.37280000   0.65042237
  0.37280000  -0.65042080
  0.37280000   0.65042237
  0.37280000  -0.65042080
  0.37280000   0.65042237
  0.37280000  -0.65042080
  0.37280000   0.65042237
  0.37280000  -0.65042080
  0.37280000   0.65042237
  0.37360000  -0.65022590
  0.37360000   0.65022752
  0.37360000  -0.65022591
  0.37360000   0.65022752
  0.37360000  -0.65022591
  0.37360000   0.65022752
  0.37360000  -0.65022591
  0.37360000   0.65022752
  0.37360000  -0.65022591
  0.37360000   0.65022752
  0.37360000  -0.65022591
  0.37360000   0.65022752
  0.37360000  -0.65022591
  0.37360000   0.65022751
  0.37360000  -0.65022592
  0.37360000   0.65022751
  0.37360000  -0.65022592
  0.37360000   0.65022751
  0.37360000  -0.65022592
  0.37360000   0.65022751
  0.37360000  -0.65022592
  0.37360000   0.65022751
  0.37360000  -0.65022592
  0.37360000   0.65022751
  0.37360000  -0.65022592
  0.37360000   0.65022750
  0.37360000  -0.65022593
  0.37360000   0.65022750
  0.37360000  -0.65022593
  0.37360000   0.65022750
  0.37360000  -0.65022593
  0.37360000   0.65022750
  0.37360000  -0.65022593
  0.37360000   0.65022750
  0.37360000  -0.65022593
  0.37360000   0.65022750
  0.37360000  -0.65022593
  0.37360000   0.65022750
  0.37360000  -0.65022593
  0.37360000   0.65022749
  0.37440000  -0.65003079
  0.37440000   0.65003240
  0.37440000  -0.65003079
  0.37440000   0.65003240
  0.37440000  -0.65003079
  0.37440000   0.65003240
  0.37440000  -0.65003079
  0.37440000   0.65003240
  0.37440000  -0.65003079
  0.37440000   0.65003240
  0.37440000  -0.65003080
  0.37440000   0.65003239
  0.37440000  -0.65003080
  0.37440000   0.65003239
  0.37440000  -0.65003080
  0.37440000   0.65003239
  0.37440000  -0.65003080
  0.37440000   0.65003239
  0.37440000  -0.65003080
  0.37440000   0.65003239
  0.37440000  -0.65003080
  0.37440000   0.65003239
  0.37440000  -0.65003081
  0.37440000   0.65003238
  0.37440000  -0.65003081
  0.37440000   0.65003238
  0.37440000  -0.65003081
  0.37440000   0.65003238
  0.37440000  -0.65003081
  0.37440000   0.65003238
  0.37440000  -0.65003081
  0.37440000   0.65003238
  0.37440000  -0.65003081
  0.37440000   0.65003238
  0.37440000  -0.65003082
  0.37440000   0.65003238
  0.37440000  -0.65003082
  0.37440000   0.65003237
  0.37440000  -0.65003082
  0.37440000   0.65003237
  0.37520000  -0.64983542
  0.37520000   0.64983703
  0.37520000  -0.64983543
  0.37520000   0.64983703
  0.37520000  -0.64983543
  0.37520000   0.64983703
  0.37520000  -0.64983543
  0.37520000   0.64983703
  0.37520000  -0.64983543
  0.37520000   0.64983703
  0.37520000  -0.64983543
  0.37520000   0.64983703
  0.37520000  -0.64983543
  0.37520000   0.64983702
  0.37520000  -0.64983544
  0.37520000   0.64983702
  0.37520000  -0.64983544
  0.37520000   0.64983702
  0.37520000  -0.64983544
  0.37520000   0.64983702
  0.37520000  -0.64983544
  0.37520000   0.64983702
  0.37520000  -0.64983544
  0.37520000   0.64983702
  0.37520000  -0.64983544
  0.37520000   0.64983701
  0.37520000  -0.64983545
  0.37520000   0.64983701
  0.37520000  -0.64983545
  0.37520000   0.64983701
  0.37520000  -0.64983545
  0.37520000   0.64983701
  0.37520000  -0.64983545
  0.37520000   0.64983701
  0.37520000  -0.64983545
  0.37520000   0.64983701
  0.37520000  -0.64983545
  0.37520000   0.64983700
  0.37520000  -0.64983545
  0.37520000   0.64983700
  0.37600000  -0.64963981
  0.37600000   0.64964142
  0.37600000  -0.64963981
  0.37600000   0.64964141
  0.37600000  -0.64963982
  0.37600000   0.64964141
  0.37600000  -0.64963982
  0.37600000   0.64964141
  0.37600000  -0.64963982
  0.37600000   0.64964141
  0.37600000  -0.64963982
  0.37600000   0.64964141
  0.37600000  -0.64963982
  0.37600000   0.64964141
  0.37600000  -0.64963982
  0.37600000   0.64964140
  0.37600000  -0.64963983
  0.37600000   0.64964140
  0.37600000  -0.64963983
  0.37600000   0.64964140
  0.37600000  -0.64963983
  0.37600000   0.64964140
  0.37600000  -0.64963983
  0.37600000   0.64964140
  0.37600000  -0.64963983
  0.37600000   0.64964140
  0.37600000  -0.64963983
  0.37600000   0.64964139
  0.37600000  -0.64963983
  0.37600000   0.64964139
  0.37600000  -0.64963984
  0.37600000   0.64964139
  0.37600000  -0.64963984
  0.37600000   0.64964139
  0.37600000  -0.64963984
  0.37600000   0.64964139
  0.37600000  -0.64963984
  0.37600000   0.64964139
  0.37600000  -0.64963984
  0.37600000   0.64964139
  0.37680000  -0.64944395
  0.37680000   0.64944555
  0.37680000  -0.64944395
  0.37680000   0.64944555
  0.37680000  -0.64944395
  0.37680000   0.64944555
  0.37680000  -0.64944396
  0.37680000   0.64944554
  0.37680000  -0.64944396
  0.37680000   0.64944554
  0.37680000  -0.64944396
  0.37680000   0.64944554
  0.37680000  -0.64944396
  0.37680000   0.64944554
  0.37680000  -0.64944396
  0.37680000   0.64944554
  0.37680000  -0.64944396
  0.37680000   0.64944554
  0.37680000  -0.64944397
  0.37680000   0.64944553
  0.37680000  -0.64944397
  0.37680000   0.64944553
  0.37680000  -0.64944397
  0.37680000   0.64944553
  0.37680000  -0.64944397
  0.37680000   0.64944553
  0.37680000  -0.64944397
  0.37680000   0.64944553
  0.37680000  -0.64944397
  0.37680000   0.64944553
  0.37680000  -0.64944397
  0.37680000   0.64944552
  0.37680000  -0.64944398
  0.37680000   0.64944552
  0.37680000  -0.64944398
  0.37680000   0.64944552
  0.37680000  -0.64944398
  0.37680000   0.64944552
  0.37680000  -0.64944398
  0.37680000   0.64944552
  0.37760000  -0.64924784
  0.37760000   0.64924943
  0.37760000  -0.64924784
  0.37760000   0.64924943
  0.37760000  -0.64924784
  0.37760000   0.64924943
  0.37760000  -0.64924784
  0.37760000   0.64924943
  0.37760000  -0.64924785
  0.37760000   0.64924943
  0.37760000  -0.64924785
  0.37760000   0.64924942
  0.37760000  -0.64924785
  0.37760000   0.64924942
  0.37760000  -0.64924785
  0.37760000   0.64924942
  0.37760000  -0.64924785
  0.37760000   0.64924942
  0.37760000  -0.64924785
  0.37760000   0.64924942
  0.37760000  -0.64924786
  0.37760000   0.64924942
  0.37760000  -0.64924786
  0.37760000   0.64924941
  0.37760000  -0.64924786
  0.37760000   0.64924941
  0.37760000  -0.64924786
  0.37760000   0.64924941
  0.37760000  -0.64924786
  0.37760000   0.64924941
  0.37760000  -0.64924786
  0.37760000   0.64924941
  0.37760000  -0.64924787
  0.37760000   0.64924941
  0.37760000  -0.64924787
  0.37760000   0.64924940
  0.37760000  -0.64924787
  0.37760000   0.64924940
  0.37760000  -0.64924787
  0.37760000   0.64924940
  0.37840000  -0.64905148
  0.37840000   0.64905306
  0.37840000  -0.64905148
  0.37840000   0.64905306
  0.37840000  -0.64905148
  0.37840000   0.64905306
  0.37840000  -0.64905148
  0.37840000   0.64905306
  0.37840000  -0.64905148
  0.37840000   0.64905306
  0.37840000  -0.64905149
  0.37840000   0.64905306
  0.37840000  -0.64905149
  0.37840000   0.64905306
  0.37840000  -0.64905149
  0.37840000   0.64905305
  0.37840000  -0.64905149
  0.37840000   0.64905305
  0.37840000  -0.64905149
  0.37840000   0.64905305
  0.37840000  -0.64905149
  0.37840000   0.64905305
  0.37840000  -0.64905150
  0.37840000   0.64905305
  0.37840000  -0.64905150
  0.37840000   0.64905305
  0.37840000  -0.64905150
  0.37840000   0.64905304
  0.37840000  -0.64905150
  0.37840000   0.64905304
  0.37840000  -0.64905150
  0.37840000   0.64905304
  0.37840000  -0.64905150
  0.37840000   0.64905304
  0.37840000  -0.64905151
  0.37840000   0.64905304
  0.37840000  -0.64905151
  0.37840000   0.64905304
  0.37840000  -0.64905151
  0.37840000   0.64905303
  0.37920000  -0.64885487
  0.37920000   0.64885645
  0.37920000  -0.64885487
  0.37920000   0.64885645
  0.37920000  -0.64885487
  0.37920000   0.64885644
  0.37920000  -0.64885487
  0.37920000   0.64885644
  0.37920000  -0.64885487
  0.37920000   0.64885644
  0.37920000  -0.64885487
  0.37920000   0.64885644
  0.37920000  -0.64885488
  0.37920000   0.64885644
  0.37920000  -0.64885488
  0.37920000   0.64885644
  0.37920000  -0.64885488
  0.37920000   0.64885643
  0.37920000  -0.64885488
  0.37920000   0.64885643
  0.37920000  -0.64885488
  0.37920000   0.64885643
  0.37920000  -0.64885488
  0.37920000   0.64885643
  0.37920000  -0.64885489
  0.37920000   0.64885643
  0.37920000  -0.64885489
  0.37920000   0.64885643
  0.37920000  -0.64885489
  0.37920000   0.64885643
  0.37920000  -0.64885489
  0.37920000   0.64885642
  0.37920000  -0.64885489
  0.37920000   0.64885642
  0.37920000  -0.64885489
  0.37920000   0.64885642
  0.37920000  -0.64885489
  0.37920000   0.64885642
  0.37920000  -0.64885490
  0.37920000   0.64885642
  0.38000000  -0.64865800
  0.38000000   0.64865958
  0.38000000  -0.64865801
  0.38000000   0.64865958
  0.38000000  -0.64865801
  0.38000000   0.64865958
  0.38000000  -0.64865801
  0.38000000   0.64865957
  0.38000000  -0.64865801
  0.38000000   0.64865957
  0.38000000  -0.64865801
  0.38000000   0.64865957
  0.38000000  -0.64865801
  0.38000000   0.64865957
  0.38000000  -0.64865801
  0.38000000   0.64865957
  0.38000000  -0.64865802
  0.38000000   0.64865957
  0.38000000  -0.64865802
  0.38000000   0.64865956
  0.38000000  -0.64865802
  0.38000000   0.64865956
  0.38000000  -0.64865802
  0.38000000   0.64865956
  0.38000000  -0.64865802
  0.38000000   0.64865956
  0.38000000  -0.64865802
  0.38000000   0.64865956
  0.38000000  -0.64865803
  0.38000000   0.64865956
  0.38000000  -0.64865803
  0.38000000   0.64865956
  0.38000000  -0.64865803
  0.38000000   0.64865955
  0.38000000  -0.64865803
  0.38000000   0.64865955
  0.38000000  -0.64865803
  0.38000000   0.64865955
  0.38000000  -0.64865803
  0.38000000   0.64865955
  0.38080000  -0.64846089
  0.38080000   0.64846246
  0.38080000  -0.64846089
  0.38080000   0.64846246
  0.38080000  -0.64846089
  0.38080000   0.64846246
  0.38080000  -0.64846089
  0.38080000   0.64846245
  0.38080000  -0.64846090
  0.38080000   0.64846245
  0.38080000  -0.64846090
  0.38080000   0.64846245
  0.38080000  -0.64846090
  0.38080000   0.64846245
  0.38080000  -0.64846090
  0.38080000   0.64846245
  0.38080000  -0.64846090
  0.38080000   0.64846245
  0.38080000  -0.64846090
  0.38080000   0.64846244
  0.38080000  -0.64846090
  0.38080000   0.64846244
  0.38080000  -0.64846091
  0.38080000   0.64846244
  0.38080000  -0.64846091
  0.38080000   0.64846244
  0.38080000  -0.64846091
  0.38080000   0.64846244
  0.38080000  -0.64846091
  0.38080000   0.64846244
  0.38080000  -0.64846091
  0.38080000   0.64846244
  0.38080000  -0.64846091
  0.38080000   0.64846243
  0.38080000  -0.64846092
  0.38080000   0.64846243
  0.38080000  -0.64846092
  0.38080000   0.64846243
  0.38080000  -0.64846092
  0.38080000   0.64846243
  0.38160000  -0.64826352
  0.38160000   0.64826509
  0.38160000  -0.64826352
  0.38160000   0.64826508
  0.38160000  -0.64826353
  0.38160000   0.64826508
  0.38160000  -0.64826353
  0.38160000   0.64826508
  0.38160000  -0.64826353
  0.38160000   0.64826508
  0.38160000  -0.64826353
  0.38160000   0.64826508
  0.38160000  -0.64826353
  0.38160000   0.64826508
  0.38160000  -0.64826353
  0.38160000   0.64826508
  0.38160000  -0.64826354
  0.38160000   0.64826507
  0.38160000  -0.64826354
  0.38160000   0.64826507
  0.38160000  -0.64826354
  0.38160000   0.64826507
  0.38160000  -0.64826354
  0.38160000   0.64826507
  0.38160000  -0.64826354
  0.38160000   0.64826507
  0.38160000  -0.64826354
  0.38160000   0.64826507
  0.38160000  -0.64826354
  0.38160000   0.64826506
  0.38160000  -0.64826355
  0.38160000   0.64826506
  0.38160000  -0.64826355
  0.38160000   0.64826506
  0.38160000  -0.64826355
  0.38160000   0.64826506
  0.38160000  -0.64826355
  0.38160000   0.64826506
  0.38160000  -0.64826355
  0.38160000   0.64826506
  0.38240000  -0.64806590
  0.38240000   0.64806746
  0.38240000  -0.64806590
  0.38240000   0.64806746
  0.38240000  -0.64806591
  0.38240000   0.64806746
  0.38240000  -0.64806591
  0.38240000   0.64806746
  0.38240000  -0.64806591
  0.38240000   0.64806746
  0.38240000  -0.64806591
  0.38240000   0.64806745
  0.38240000  -0.64806591
  0.38240000   0.64806745
  0.38240000  -0.64806591
  0.38240000   0.64806745
  0.38240000  -0.64806592
  0.38240000   0.64806745
  0.38240000  -0.64806592
  0.38240000   0.64806745
  0.38240000  -0.64806592
  0.38240000   0.64806745
  0.38240000  -0.64806592
  0.38240000   0.64806744
  0.38240000  -0.64806592
  0.38240000   0.64806744
  0.38240000  -0.64806592
  0.38240000   0.64806744
  0.38240000  -0.64806592
  0.38240000   0.64806744
  0.38240000  -0.64806593
  0.38240000   0.64806744
  0.38240000  -0.64806593
  0.38240000   0.64806744
  0.38240000  -0.64806593
  0.38240000   0.64806744
  0.38240000  -0.64806593
  0.38240000   0.64806743
  0.38240000  -0.64806593
  0.38240000   0.64806743
  0.38320000  -0.64786803
  0.38320000   0.64786958
  0.38320000  -0.64786803
  0.38320000   0.64786958
  0.38320000  -0.64786803
  0.38320000   0.64786958
  0.38320000  -0.64786804
  0.38320000   0.64786958
  0.38320000  -0.64786804
  0.38320000   0.64786958
  0.38320000  -0.64786804
  0.38320000   0.64786958
  0.38320000  -0.64786804
  0.38320000   0.64786957
  0.38320000  -0.64786804
  0.38320000   0.64786957
  0.38320000  -0.64786804
  0.38320000   0.64786957
  0.38320000  -0.64786804
  0.38320000   0.64786957
  0.38320000  -0.64786805
  0.38320000   0.64786957
  0.38320000  -0.64786805
  0.38320000   0.64786957
  0.38320000  -0.64786805
  0.38320000   0.64786956
  0.38320000  -0.64786805
  0.38320000   0.64786956
  0.38320000  -0.64786805
  0.38320000   0.64786956
  0.38320000  -0.64786805
  0.38320000   0.64786956
  0.38320000  -0.64786806
  0.38320000   0.64786956
  0.38320000  -0.64786806
  0.38320000   0.64786956
  0.38320000  -0.64786806
  0.38320000   0.64786956
  0.38320000  -0.64786806
  0.38320000   0.64786955
  0.38400000  -0.64766990
  0.38400000   0.64767145
  0.38400000  -0.64766991
  0.38400000   0.64767145
  0.38400000  -0.64766991
  0.38400000   0.64767145
  0.38400000  -0.64766991
  0.38400000   0.64767145
  0.38400000  -0.64766991
  0.38400000   0.64767145
  0.38400000  -0.64766991
  0.38400000   0.64767144
  0.38400000  -0.64766991
  0.38400000   0.64767144
  0.38400000  -0.64766992
  0.38400000   0.64767144
  0.38400000  -0.64766992
  0.38400000   0.64767144
  0.38400000  -0.64766992
  0.38400000   0.64767144
  0.38400000  -0.64766992
  0.38400000   0.64767144
  0.38400000  -0.64766992
  0.38400000   0.64767143
  0.38400000  -0.64766992
  0.38400000   0.64767143
  0.38400000  -0.64766992
  0.38400000   0.64767143
  0.38400000  -0.64766993
  0.38400000   0.64767143
  0.38400000  -0.64766993
  0.38400000   0.64767143
  0.38400000  -0.64766993
  0.38400000   0.64767143
  0.38400000  -0.64766993
  0.38400000   0.64767143
  0.38400000  -0.64766993
  0.38400000   0.64767142
  0.38400000  -0.64766993
  0.38400000   0.64767142
  0.38480000  -0.64747152
  0.38480000   0.64747307
  0.38480000  -0.64747153
  0.38480000   0.64747306
  0.38480000  -0.64747153
  0.38480000   0.64747306
  0.38480000  -0.64747153
  0.38480000   0.64747306
  0.38480000  -0.64747153
  0.38480000   0.64747306
  0.38480000  -0.64747153
  0.38480000   0.64747306
  0.38480000  -0.64747153
  0.38480000   0.64747306
  0.38480000  -0.64747153
  0.38480000   0.64747305
  0.38480000  -0.64747154
  0.38480000   0.64747305
  0.38480000  -0.64747154
  0.38480000   0.64747305
  0.38480000  -0.64747154
  0.38480000   0.64747305
  0.38480000  -0.64747154
  0.38480000   0.64747305
  0.38480000  -0.64747154
  0.38480000   0.64747305
  0.38480000  -0.64747154
  0.38480000   0.64747305
  0.38480000  -0.64747155
  0.38480000   0.64747304
  0.38480000  -0.64747155
  0.38480000   0.64747304
  0.38480000  -0.64747155
  0.38480000   0.64747304
  0.38480000  -0.64747155
  0.38480000   0.64747304
  0.38480000  -0.64747155
  0.38480000   0.64747304
  0.38480000  -0.64747155
  0.38480000   0.64747304
  0.38560000  -0.64727289
  0.38560000   0.64727442
  0.38560000  -0.64727289
  0.38560000   0.64727442
  0.38560000  -0.64727289
  0.38560000   0.64727442
  0.38560000  -0.64727289
  0.38560000   0.64727442
  0.38560000  -0.64727289
  0.38560000   0.64727442
  0.38560000  -0.64727290
  0.38560000   0.64727442
  0.38560000  -0.64727290
  0.38560000   0.64727442
  0.38560000  -0.64727290
  0.38560000   0.64727441
  0.38560000  -0.64727290
  0.38560000   0.64727441
  0.38560000  -0.64727290
  0.38560000   0.64727441
  0.38560000  -0.64727290
  0.38560000   0.64727441
  0.38560000  -0.64727291
  0.38560000   0.64727441
  0.38560000  -0.64727291
  0.38560000   0.64727441
  0.38560000  -0.64727291
  0.38560000   0.64727440
  0.38560000  -0.64727291
  0.38560000   0.64727440
  0.38560000  -0.64727291
  0.38560000   0.64727440
  0.38560000  -0.64727291
  0.38560000   0.64727440
  0.38560000  -0.64727291
  0.38560000   0.64727440
  0.38560000  -0.64727292
  0.38560000   0.64727440
  0.38560000  -0.64727292
  0.38560000   0.64727440
  0.38640000  -0.64707400
  0.38640000   0.64707553
  0.38640000  -0.64707400
  0.38640000   0.64707553
  0.38640000  -0.64707400
  0.38640000   0.64707553
  0.38640000  -0.64707400
  0.38640000   0.64707552
  0.38640000  -0.64707400
  0.38640000   0.64707552
  0.38640000  -0.64707401
  0.38640000   0.64707552
  0.38640000  -0.64707401
  0.38640000   0.64707552
  0.38640000  -0.64707401
  0.38640000   0.64707552
  0.38640000  -0.64707401
  0.38640000   0.64707552
  0.38640000  -0.64707401
  0.38640000   0.64707551
  0.38640000  -0.64707401
  0.38640000   0.64707551
  0.38640000  -0.64707401
  0.38640000   0.64707551
  0.38640000  -0.64707402
  0.38640000   0.64707551
  0.38640000  -0.64707402
  0.38640000   0.64707551
  0.38640000  -0.64707402
  0.38640000   0.64707551
  0.38640000  -0.64707402
  0.38640000   0.64707551
  0.38640000  -0.64707402
  0.38640000   0.64707550
  0.38640000  -0.64707402
  0.38640000   0.64707550
  0.38640000  -0.64707403
  0.38640000   0.64707550
  0.38640000  -0.64707403
  0.38640000   0.64707550
  0.38720000  -0.64687485
  0.38720000   0.64687638
  0.38720000  -0.64687485
  0.38720000   0.64687638
  0.38720000  -0.64687485
  0.38720000   0.64687637
  0.38720000  -0.64687486
  0.38720000   0.64687637
  0.38720000  -0.64687486
  0.38720000   0.64687637
  0.38720000  -0.64687486
  0.38720000   0.64687637
  0.38720000  -0.64687486
  0.38720000   0.64687637
  0.38720000  -0.64687486
  0.38720000   0.64687637
  0.38720000  -0.64687486
  0.38720000   0.64687636
  0.38720000  -0.64687487
  0.38720000   0.64687636
  0.38720000  -0.64687487
  0.38720000   0.64687636
  0.38720000  -0.64687487
  0.38720000   0.64687636
  0.38720000  -0.64687487
  0.38720000   0.64687636
  0.38720000  -0.64687487
  0.38720000   0.64687636
  0.38720000  -0.64687487
  0.38720000   0.64687636
  0.38720000  -0.64687487
  0.38720000   0.64687635
  0.38720000  -0.64687488
  0.38720000   0.64687635
  0.38720000  -0.64687488
  0.38720000   0.64687635
  0.38720000  -0.64687488
  0.38720000   0.64687635
  0.38720000  -0.64687488
  0.38720000   0.64687635
  0.38800000  -0.64667545
  0.38800000   0.64667697
  0.38800000  -0.64667545
  0.38800000   0.64667697
  0.38800000  -0.64667545
  0.38800000   0.64667697
  0.38800000  -0.64667545
  0.38800000   0.64667696
  0.38800000  -0.64667546
  0.38800000   0.64667696
  0.38800000  -0.64667546
  0.38800000   0.64667696
  0.38800000  -0.64667546
  0.38800000   0.64667696
  0.38800000  -0.64667546
  0.38800000   0.64667696
  0.38800000  -0.64667546
  0.38800000   0.64667696
  0.38800000  -0.64667546
  0.38800000   0.64667696
  0.38800000  -0.64667546
  0.38800000   0.64667695
  0.38800000  -0.64667547
  0.38800000   0.64667695
  0.38800000  -0.64667547
  0.38800000   0.64667695
  0.38800000  -0.64667547
  0.38800000   0.64667695
  0.38800000  -0.64667547
  0.38800000   0.64667695
  0.38800000  -0.64667547
  0.38800000   0.64667695
  0.38800000  -0.64667547
  0.38800000   0.64667695
  0.38800000  -0.64667548
  0.38800000   0.64667694
  0.38800000  -0.64667548
  0.38800000   0.64667694
  0.38800000  -0.64667548
  0.38800000   0.64667694
  0.38880000  -0.64647579
  0.38880000   0.64647730
  0.38880000  -0.64647579
  0.38880000   0.64647730
  0.38880000  -0.64647579
  0.38880000   0.64647730
  0.38880000  -0.64647579
  0.38880000   0.64647730
  0.38880000  -0.64647580
  0.38880000   0.64647730
  0.38880000  -0.64647580
  0.38880000   0.64647730
  0.38880000  -0.64647580
  0.38880000   0.64647730
  0.38880000  -0.64647580
  0.38880000   0.64647729
  0.38880000  -0.64647580
  0.38880000   0.64647729
  0.38880000  -0.64647580
  0.38880000   0.64647729
  0.38880000  -0.64647581
  0.38880000   0.64647729
  0.38880000  -0.64647581
  0.38880000   0.64647729
  0.38880000  -0.64647581
  0.38880000   0.64647729
  0.38880000  -0.64647581
  0.38880000   0.64647728
  0.38880000  -0.64647581
  0.38880000   0.64647728
  0.38880000  -0.64647581
  0.38880000   0.64647728
  0.38880000  -0.64647581
  0.38880000   0.64647728
  0.38880000  -0.64647582
  0.38880000   0.64647728
  0.38880000  -0.64647582
  0.38880000   0.64647728
  0.38880000  -0.64647582
  0.38880000   0.64647728
  0.38960000  -0.64627587
  0.38960000   0.64627738
  0.38960000  -0.64627587
  0.38960000   0.64627738
  0.38960000  -0.64627588
  0.38960000   0.64627738
  0.38960000  -0.64627588
  0.38960000   0.64627738
  0.38960000  -0.64627588
  0.38960000   0.64627738
  0.38960000  -0.64627588
  0.38960000   0.64627737
  0.38960000  -0.64627588
  0.38960000   0.64627737
  0.38960000  -0.64627588
  0.38960000   0.64627737
  0.38960000  -0.64627589
  0.38960000   0.64627737
  0.38960000  -0.64627589
  0.38960000   0.64627737
  0.38960000  -0.64627589
  0.38960000   0.64627737
  0.38960000  -0.64627589
  0.38960000   0.64627737
  0.38960000  -0.64627589
  0.38960000   0.64627736
  0.38960000  -0.64627589
  0.38960000   0.64627736
  0.38960000  -0.64627589
  0.38960000   0.64627736
  0.38960000  -0.64627590
  0.38960000   0.64627736
  0.38960000  -0.64627590
  0.38960000   0.64627736
  0.38960000  -0.64627590
  0.38960000   0.64627736
  0.38960000  -0.64627590
  0.38960000   0.64627736
  0.38960000  -0.64627590
  0.38960000   0.64627735
  0.39040000  -0.64607570
  0.39040000   0.64607720
  0.39040000  -0.64607570
  0.39040000   0.64607720
  0.39040000  -0.64607570
  0.39040000   0.64607720
  0.39040000  -0.64607570
  0.39040000   0.64607720
  0.39040000  -0.64607571
  0.39040000   0.64607720
  0.39040000  -0.64607571
  0.39040000   0.64607719
  0.39040000  -0.64607571
  0.39040000   0.64607719
  0.39040000  -0.64607571
  0.39040000   0.64607719
  0.39040000  -0.64607571
  0.39040000   0.64607719
  0.39040000  -0.64607571
  0.39040000   0.64607719
  0.39040000  -0.64607571
  0.39040000   0.64607719
  0.39040000  -0.64607572
  0.39040000   0.64607719
  0.39040000  -0.64607572
  0.39040000   0.64607718
  0.39040000  -0.64607572
  0.39040000   0.64607718
  0.39040000  -0.64607572
  0.39040000   0.64607718
  0.39040000  -0.64607572
  0.39040000   0.64607718
  0.39040000  -0.64607572
  0.39040000   0.64607718
  0.39040000  -0.64607572
  0.39040000   0.64607718
  0.39040000  -0.64607573
  0.39040000   0.64607718
  0.39040000  -0.64607573
  0.39040000   0.64607717
  0.39120000  -0.64587527
  0.39120000   0.64587676
  0.39120000  -0.64587527
  0.39120000   0.64587676
  0.39120000  -0.64587527
  0.39120000   0.64587676
  0.39120000  -0.64587527
  0.39120000   0.64587676
  0.39120000  -0.64587527
  0.39120000   0.64587676
  0.39120000  -0.64587527
  0.39120000   0.64587676
  0.39120000  -0.64587528
  0.39120000   0.64587676
  0.39120000  -0.64587528
  0.39120000   0.64587675
  0.39120000  -0.64587528
  0.39120000   0.64587675
  0.39120000  -0.64587528
  0.39120000   0.64587675
  0.39120000  -0.64587528
  0.39120000   0.64587675
  0.39120000  -0.64587528
  0.39120000   0.64587675
  0.39120000  -0.64587528
  0.39120000   0.64587675
  0.39120000  -0.64587529
  0.39120000   0.64587674
  0.39120000  -0.64587529
  0.39120000   0.64587674
  0.39120000  -0.64587529
  0.39120000   0.64587674
  0.39120000  -0.64587529
  0.39120000   0.64587674
  0.39120000  -0.64587529
  0.39120000   0.64587674
  0.39120000  -0.64587529
  0.39120000   0.64587674
  0.39120000  -0.64587529
  0.39120000   0.64587674
  0.39200000  -0.64567457
  0.39200000   0.64567607
  0.39200000  -0.64567458
  0.39200000   0.64567607
  0.39200000  -0.64567458
  0.39200000   0.64567606
  0.39200000  -0.64567458
  0.39200000   0.64567606
  0.39200000  -0.64567458
  0.39200000   0.64567606
  0.39200000  -0.64567458
  0.39200000   0.64567606
  0.39200000  -0.64567458
  0.39200000   0.64567606
  0.39200000  -0.64567458
  0.39200000   0.64567606
  0.39200000  -0.64567459
  0.39200000   0.64567605
  0.39200000  -0.64567459
  0.39200000   0.64567605
  0.39200000  -0.64567459
  0.39200000   0.64567605
  0.39200000  -0.64567459
  0.39200000   0.64567605
  0.39200000  -0.64567459
  0.39200000   0.64567605
  0.39200000  -0.64567459
  0.39200000   0.64567605
  0.39200000  -0.64567460
  0.39200000   0.64567605
  0.39200000  -0.64567460
  0.39200000   0.64567604
  0.39200000  -0.64567460
  0.39200000   0.64567604
  0.39200000  -0.64567460
  0.39200000   0.64567604
  0.39200000  -0.64567460
  0.39200000   0.64567604
  0.39200000  -0.64567460
  0.39200000   0.64567604
  0.39280000  -0.64547362
  0.39280000   0.64547511
  0.39280000  -0.64547362
  0.39280000   0.64547511
  0.39280000  -0.64547363
  0.39280000   0.64547511
  0.39280000  -0.64547363
  0.39280000   0.64547511
  0.39280000  -0.64547363
  0.39280000   0.64547510
  0.39280000  -0.64547363
  0.39280000   0.64547510
  0.39280000  -0.64547363
  0.39280000   0.64547510
  0.39280000  -0.64547363
  0.39280000   0.64547510
  0.39280000  -0.64547364
  0.39280000   0.64547510
  0.39280000  -0.64547364
  0.39280000   0.64547510
  0.39280000  -0.64547364
  0.39280000   0.64547510
  0.39280000  -0.64547364
  0.39280000   0.64547509
  0.39280000  -0.64547364
  0.39280000   0.64547509
  0.39280000  -0.64547364
  0.39280000   0.64547509
  0.39280000  -0.64547364
  0.39280000   0.64547509
  0.39280000  -0.64547365
  0.39280000   0.64547509
  0.39280000  -0.64547365
  0.39280000   0.64547509
  0.39280000  -0.64547365
  0.39280000   0.64547509
  0.39280000  -0.64547365
  0.39280000   0.64547508
  0.39280000  -0.64547365
  0.39280000   0.64547508
  0.39360000  -0.64527241
  0.39360000   0.64527389
  0.39360000  -0.64527241
  0.39360000   0.64527389
  0.39360000  -0.64527241
  0.39360000   0.64527389
  0.39360000  -0.64527242
  0.39360000   0.64527389
  0.39360000  -0.64527242
  0.39360000   0.64527389
  0.39360000  -0.64527242
  0.39360000   0.64527389
  0.39360000  -0.64527242
  0.39360000   0.64527388
  0.39360000  -0.64527242
  0.39360000   0.64527388
  0.39360000  -0.64527242
  0.39360000   0.64527388
  0.39360000  -0.64527243
  0.39360000   0.64527388
  0.39360000  -0.64527243
  0.39360000   0.64527388
  0.39360000  -0.64527243
  0.39360000   0.64527388
  0.39360000  -0.64527243
  0.39360000   0.64527388
  0.39360000  -0.64527243
  0.39360000   0.64527387
  0.39360000  -0.64527243
  0.39360000   0.64527387
  0.39360000  -0.64527243
  0.39360000   0.64527387
  0.39360000  -0.64527244
  0.39360000   0.64527387
  0.39360000  -0.64527244
  0.39360000   0.64527387
  0.39360000  -0.64527244
  0.39360000   0.64527387
  0.39360000  -0.64527244
  0.39360000   0.64527387
  0.39440000  -0.64507094
  0.39440000   0.64507242
  0.39440000  -0.64507094
  0.39440000   0.64507242
  0.39440000  -0.64507094
  0.39440000   0.64507241
  0.39440000  -0.64507094
  0.39440000   0.64507241
  0.39440000  -0.64507095
  0.39440000   0.64507241
  0.39440000  -0.64507095
  0.39440000   0.64507241
  0.39440000  -0.64507095
  0.39440000   0.64507241
  0.39440000  -0.64507095
  0.39440000   0.64507241
  0.39440000  -0.64507095
  0.39440000   0.64507240
  0.39440000  -0.64507095
  0.39440000   0.64507240
  0.39440000  -0.64507096
  0.39440000   0.64507240
  0.39440000  -0.64507096
  0.39440000   0.64507240
  0.39440000  -0.64507096
  0.39440000   0.64507240
  0.39440000  -0.64507096
  0.39440000   0.64507240
  0.39440000  -0.64507096
  0.39440000   0.64507240
  0.39440000  -0.64507096
  0.39440000   0.64507239
  0.39440000  -0.64507096
  0.39440000   0.64507239
  0.39440000  -0.64507097
  0.39440000   0.64507239
  0.39440000  -0.64507097
  0.39440000   0.64507239
  0.39440000  -0.64507097
  0.39440000   0.64507239
  0.39520000  -0.64486921
  0.39520000   0.64487068
  0.39520000  -0.64486921
  0.39520000   0.64487068
  0.39520000  -0.64486921
  0.39520000   0.64487068
  0.39520000  -0.64486921
  0.39520000   0.64487067
  0.39520000  -0.64486921
  0.39520000   0.64487067
  0.39520000  -0.64486921
  0.39520000   0.64487067
  0.39520000  -0.64486922
  0.39520000   0.64487067
  0.39520000  -0.64486922
  0.39520000   0.64487067
  0.39520000  -0.64486922
  0.39520000   0.64487067
  0.39520000  -0.64486922
  0.39520000   0.64487067
  0.39520000  -0.64486922
  0.39520000   0.64487066
  0.39520000  -0.64486922
  0.39520000   0.64487066
  0.39520000  -0.64486923
  0.39520000   0.64487066
  0.39520000  -0.64486923
  0.39520000   0.64487066
  0.39520000  -0.64486923
  0.39520000   0.64487066
  0.39520000  -0.64486923
  0.39520000   0.64487066
  0.39520000  -0.64486923
  0.39520000   0.64487066
  0.39520000  -0.64486923
  0.39520000   0.64487065
  0.39520000  -0.64486923
  0.39520000   0.64487065
  0.39520000  -0.64486924
  0.39520000   0.64487065
  0.39600000  -0.64466721
  0.39600000   0.64466868
  0.39600000  -0.64466721
  0.39600000   0.64466868
  0.39600000  -0.64466722
  0.39600000   0.64466868
  0.39600000  -0.64466722
  0.39600000   0.64466867
  0.39600000  -0.64466722
  0.39600000   0.64466867
  0.39600000  -0.64466722
  0.39600000   0.64466867
  0.39600000  -0.64466722
  0.39600000   0.64466867
  0.39600000  -0.64466722
  0.39600000   0.64466867
  0.39600000  -0.64466722
  0.39600000   0.64466867
  0.39600000  -0.64466723
  0.39600000   0.64466867
  0.39600000  -0.64466723
  0.39600000   0.64466866
  0.39600000  -0.64466723
  0.39600000   0.64466866
  0.39600000  -0.64466723
  0.39600000   0.64466866
  0.39600000  -0.64466723
  0.39600000   0.64466866
  0.39600000  -0.64466723
  0.39600000   0.64466866
  0.39600000  -0.64466724
  0.39600000   0.64466866
  0.39600000  -0.64466724
  0.39600000   0.64466866
  0.39600000  -0.64466724
  0.39600000   0.64466865
  0.39600000  -0.64466724
  0.39600000   0.64466865
  0.39600000  -0.64466724
  0.39600000   0.64466865
  0.39680000  -0.64446496
  0.39680000   0.64446642
  0.39680000  -0.64446496
  0.39680000   0.64446642
  0.39680000  -0.64446496
  0.39680000   0.64446641
  0.39680000  -0.64446496
  0.39680000   0.64446641
  0.39680000  -0.64446496
  0.39680000   0.64446641
  0.39680000  -0.64446496
  0.39680000   0.64446641
  0.39680000  -0.64446497
  0.39680000   0.64446641
  0.39680000  -0.64446497
  0.39680000   0.64446641
  0.39680000  -0.64446497
  0.39680000   0.64446641
  0.39680000  -0.64446497
  0.39680000   0.64446640
  0.39680000  -0.64446497
  0.39680000   0.64446640
  0.39680000  -0.64446497
  0.39680000   0.64446640
  0.39680000  -0.64446497
  0.39680000   0.64446640
  0.39680000  -0.64446498
  0.39680000   0.64446640
  0.39680000  -0.64446498
  0.39680000   0.64446640
  0.39680000  -0.64446498
  0.39680000   0.64446640
  0.39680000  -0.64446498
  0.39680000   0.64446639
  0.39680000  -0.64446498
  0.39680000   0.64446639
  0.39680000  -0.64446498
  0.39680000   0.64446639
  0.39680000  -0.64446498
  0.39680000   0.64446639
  0.39760000  -0.64426244
  0.39760000   0.64426389
  0.39760000  -0.64426244
  0.39760000   0.64426389
  0.39760000  -0.64426244
  0.39760000   0.64426389
  0.39760000  -0.64426244
  0.39760000   0.64426389
  0.39760000  -0.64426244
  0.39760000   0.64426389
  0.39760000  -0.64426244
  0.39760000   0.64426388
  0.39760000  -0.64426245
  0.39760000   0.64426388
  0.39760000  -0.64426245
  0.39760000   0.64426388
  0.39760000  -0.64426245
  0.39760000   0.64426388
  0.39760000  -0.64426245
  0.39760000   0.64426388
  0.39760000  -0.64426245
  0.39760000   0.64426388
  0.39760000  -0.64426245
  0.39760000   0.64426388
  0.39760000  -0.64426246
  0.39760000   0.64426387
  0.39760000  -0.64426246
  0.39760000   0.64426387
  0.39760000  -0.64426246
  0.39760000   0.64426387
  0.39760000  -0.64426246
  0.39760000   0.64426387
  0.39760000  -0.64426246
  0.39760000   0.64426387
  0.39760000  -0.64426246
  0.39760000   0.64426387
  0.39760000  -0.64426246
  0.39760000   0.64426387
  0.39760000  -0.64426246
  0.39760000   0.64426387
  0.39840000  -0.64405966
  0.39840000   0.64406110
  0.39840000  -0.64405966
  0.39840000   0.64406110
  0.39840000  -0.64405966
  0.39840000   0.64406110
  0.39840000  -0.64405966
  0.39840000   0.64406110
  0.39840000  -0.64405966
  0.39840000   0.64406110
  0.39840000  -0.64405966
  0.39840000   0.64406110
  0.39840000  -0.64405966
  0.39840000   0.64406110
  0.39840000  -0.64405967
  0.39840000   0.64406109
  0.39840000  -0.64405967
  0.39840000   0.64406109
  0.39840000  -0.64405967
  0.39840000   0.64406109
  0.39840000  -0.64405967
  0.39840000   0.64406109
  0.39840000  -0.64405967
  0.39840000   0.64406109
  0.39840000  -0.64405967
  0.39840000   0.64406109
  0.39840000  -0.64405967
  0.39840000   0.64406109
  0.39840000  -0.64405968
  0.39840000   0.64406108
  0.39840000  -0.64405968
  0.39840000   0.64406108
  0.39840000  -0.64405968
  0.39840000   0.64406108
  0.39840000  -0.64405968
  0.39840000   0.64406108
  0.39840000  -0.64405968
  0.39840000   0.64406108
  0.39840000  -0.64405968
  0.39840000   0.64406108
  0.39920000  -0.64385661
  0.39920000   0.64385805
  0.39920000  -0.64385661
  0.39920000   0.64385805
  0.39920000  -0.64385661
  0.39920000   0.64385805
  0.39920000  -0.64385661
  0.39920000   0.64385805
  0.39920000  -0.64385661
  0.39920000   0.64385805
  0.39920000  -0.64385662
  0.39920000   0.64385805
  0.39920000  -0.64385662
  0.39920000   0.64385804
  0.39920000  -0.64385662
  0.39920000   0.64385804
  0.39920000  -0.64385662
  0.39920000   0.64385804
  0.39920000  -0.64385662
  0.39920000   0.64385804
  0.39920000  -0.64385662
  0.39920000   0.64385804
  0.39920000  -0.64385663
  0.39920000   0.64385804
  0.39920000  -0.64385663
  0.39920000   0.64385804
  0.39920000  -0.64385663
  0.39920000   0.64385803
  0.39920000  -0.64385663
  0.39920000   0.64385803
  0.39920000  -0.64385663
  0.39920000   0.64385803
  0.39920000  -0.64385663
  0.39920000   0.64385803
  0.39920000  -0.64385663
  0.39920000   0.64385803
  0.39920000  -0.64385663
  0.39920000   0.64385803
  0.39920000  -0.64385664
  0.39920000   0.64385803
  0.40000000  -0.64365330
  0.40000000   0.64365474
  0.40000000  -0.64365330
  0.40000000   0.64365474
  0.40000000  -0.64365330
  0.40000000   0.64365473
  0.40000000  -0.64365330
  0.40000000   0.64365473
  0.40000000  -0.64365330
  0.40000000   0.64365473
  0.40000000  -0.64365331
  0.40000000   0.64365473
  0.40000000  -0.64365331
  0.40000000   0.64365473
  0.40000000  -0.64365331
  0.40000000   0.64365473
  0.40000000  -0.64365331
  0.40000000   0.64365473
  0.40000000  -0.64365331
  0.40000000   0.64365472
  0.40000000  -0.64365331
  0.40000000   0.64365472
  0.40000000  -0.64365331
  0.40000000   0.64365472
  0.40000000  -0.64365332
  0.40000000   0.64365472
  0.40000000  -0.64365332
  0.40000000   0.64365472
  0.40000000  -0.64365332
  0.40000000   0.64365472
  0.40000000  -0.64365332
  0.40000000   0.64365472
  0.40000000  -0.64365332
  0.40000000   0.64365471
  0.40000000  -0.64365332
  0.40000000   0.64365471
  0.40000000  -0.64365332
  0.40000000   0.64365471
  0.40000000  -0.64365333
  0.40000000   0.64365471
  0.40080000  -0.64344972
  0.40080000   0.64345116
  0.40080000  -0.64344972
  0.40080000   0.64345116
  0.40080000  -0.64344973
  0.40080000   0.64345115
  0.40080000  -0.64344973
  0.40080000   0.64345115
  0.40080000  -0.64344973
  0.40080000   0.64345115
  0.40080000  -0.64344973
  0.40080000   0.64345115
  0.40080000  -0.64344973
  0.40080000   0.64345115
  0.40080000  -0.64344973
  0.40080000   0.64345115
  0.40080000  -0.64344973
  0.40080000   0.64345115
  0.40080000  -0.64344974
  0.40080000   0.64345114
  0.40080000  -0.64344974
  0.40080000   0.64345114
  0.40080000  -0.64344974
  0.40080000   0.64345114
  0.40080000  -0.64344974
  0.40080000   0.64345114
  0.40080000  -0.64344974
  0.40080000   0.64345114
  0.40080000  -0.64344974
  0.40080000   0.64345114
  0.40080000  -0.64344974
  0.40080000   0.64345114
  0.40080000  -0.64344975
  0.40080000   0.64345113
  0.40080000  -0.64344975
  0.40080000   0.64345113
  0.40080000  -0.64344975
  0.40080000   0.64345113
  0.40080000  -0.64344975
  0.40080000   0.64345113
  0.40160000  -0.64324588
  0.40160000   0.64324731
  0.40160000  -0.64324588
  0.40160000   0.64324731
  0.40160000  -0.64324589
  0.40160000   0.64324731
  0.40160000  -0.64324589
  0.40160000   0.64324731
  0.40160000  -0.64324589
  0.40160000   0.64324731
  0.40160000  -0.64324589
  0.40160000   0.64324730
  0.40160000  -0.64324589
  0.40160000   0.64324730
  0.40160000  -0.64324589
  0.40160000   0.64324730
  0.40160000  -0.64324589
  0.40160000   0.64324730
  0.40160000  -0.64324590
  0.40160000   0.64324730
  0.40160000  -0.64324590
  0.40160000   0.64324730
  0.40160000  -0.64324590
  0.40160000   0.64324730
  0.40160000  -0.64324590
  0.40160000   0.64324729
  0.40160000  -0.64324590
  0.40160000   0.64324729
  0.40160000  -0.64324590
  0.40160000   0.64324729
  0.40160000  -0.64324590
  0.40160000   0.64324729
  0.40160000  -0.64324591
  0.40160000   0.64324729
  0.40160000  -0.64324591
  0.40160000   0.64324729
  0.40160000  -0.64324591
  0.40160000   0.64324729
  0.40160000  -0.64324591
  0.40160000   0.64324728
  0.40240000  -0.64304178
  0.40240000   0.64304320
  0.40240000  -0.64304178
  0.40240000   0.64304320
  0.40240000  -0.64304178
  0.40240000   0.64304320
  0.40240000  -0.64304178
  0.40240000   0.64304319
  0.40240000  -0.64304178
  0.40240000   0.64304319
  0.40240000  -0.64304178
  0.40240000   0.64304319
  0.40240000  -0.64304178
  0.40240000   0.64304319
  0.40240000  -0.64304179
  0.40240000   0.64304319
  0.40240000  -0.64304179
  0.40240000   0.64304319
  0.40240000  -0.64304179
  0.40240000   0.64304319
  0.40240000  -0.64304179
  0.40240000   0.64304318
  0.40240000  -0.64304179
  0.40240000   0.64304318
  0.40240000  -0.64304179
  0.40240000   0.64304318
  0.40240000  -0.64304179
  0.40240000   0.64304318
  0.40240000  -0.64304180
  0.40240000   0.64304318
  0.40240000  -0.64304180
  0.40240000   0.64304318
  0.40240000  -0.64304180
  0.40240000   0.64304318
  0.40240000  -0.64304180
  0.40240000   0.64304318
  0.40240000  -0.64304180
  0.40240000   0.64304317
  0.40240000  -0.64304180
  0.40240000   0.64304317
  0.40320000  -0.64283740
  0.40320000   0.64283882
  0.40320000  -0.64283740
  0.40320000   0.64283882
  0.40320000  -0.64283741
  0.40320000   0.64283882
  0.40320000  -0.64283741
  0.40320000   0.64283882
  0.40320000  -0.64283741
  0.40320000   0.64283882
  0.40320000  -0.64283741
  0.40320000   0.64283881
  0.40320000  -0.64283741
  0.40320000   0.64283881
  0.40320000  -0.64283741
  0.40320000   0.64283881
  0.40320000  -0.64283741
  0.40320000   0.64283881
  0.40320000  -0.64283742
  0.40320000   0.64283881
  0.40320000  -0.64283742
  0.40320000   0.64283881
  0.40320000  -0.64283742
  0.40320000   0.64283881
  0.40320000  -0.64283742
  0.40320000   0.64283880
  0.40320000  -0.64283742
  0.40320000   0.64283880
  0.40320000  -0.64283742
  0.40320000   0.64283880
  0.40320000  -0.64283742
  0.40320000   0.64283880
  0.40320000  -0.64283743
  0.40320000   0.64283880
  0.40320000  -0.64283743
  0.40320000   0.64283880
  0.40320000  -0.64283743
  0.40320000   0.64283880
  0.40320000  -0.64283743
  0.40320000   0.64283879
  0.40400000  -0.64263276
  0.40400000   0.64263418
  0.40400000  -0.64263276
  0.40400000   0.64263417
  0.40400000  -0.64263277
  0.40400000   0.64263417
  0.40400000  -0.64263277
  0.40400000   0.64263417
  0.40400000  -0.64263277
  0.40400000   0.64263417
  0.40400000  -0.64263277
  0.40400000   0.64263417
  0.40400000  -0.64263277
  0.40400000   0.64263417
  0.40400000  -0.64263277
  0.40400000   0.64263417
  0.40400000  -0.64263277
  0.40400000   0.64263416
  0.40400000  -0.64263278
  0.40400000   0.64263416
  0.40400000  -0.64263278
  0.40400000   0.64263416
  0.40400000  -0.64263278
  0.40400000   0.64263416
  0.40400000  -0.64263278
  0.40400000   0.64263416
  0.40400000  -0.64263278
  0.40400000   0.64263416
  0.40400000  -0.64263278
  0.40400000   0.64263416
  0.40400000  -0.64263278
  0.40400000   0.64263415
  0.40400000  -0.64263279
  0.40400000   0.64263415
  0.40400000  -0.64263279
  0.40400000   0.64263415
  0.40400000  -0.64263279
  0.40400000   0.64263415
  0.40400000  -0.64263279
  0.40400000   0.64263415
  0.40480000  -0.64242786
  0.40480000   0.64242926
  0.40480000  -0.64242786
  0.40480000   0.64242926
  0.40480000  -0.64242786
  0.40480000   0.64242926
  0.40480000  -0.64242786
  0.40480000   0.64242926
  0.40480000  -0.64242786
  0.40480000   0.64242926
  0.40480000  -0.64242786
  0.40480000   0.64242926
  0.40480000  -0.64242786
  0.40480000   0.64242925
  0.40480000  -0.64242787
  0.40480000   0.64242925
  0.40480000  -0.64242787
  0.40480000   0.64242925
  0.40480000  -0.64242787
  0.40480000   0.64242925
  0.40480000  -0.64242787
  0.40480000   0.64242925
  0.40480000  -0.64242787
  0.40480000   0.64242925
  0.40480000  -0.64242787
  0.40480000   0.64242925
  0.40480000  -0.64242787
  0.40480000   0.64242924
  0.40480000  -0.64242787
  0.40480000   0.64242924
  0.40480000  -0.64242788
  0.40480000   0.64242924
  0.40480000  -0.64242788
  0.40480000   0.64242924
  0.40480000  -0.64242788
  0.40480000   0.64242924
  0.40480000  -0.64242788
  0.40480000   0.64242924
  0.40480000  -0.64242788
  0.40480000   0.64242924
  0.40560000  -0.64222268
  0.40560000   0.64222408
  0.40560000  -0.64222268
  0.40560000   0.64222408
  0.40560000  -0.64222268
  0.40560000   0.64222408
  0.40560000  -0.64222268
  0.40560000   0.64222408
  0.40560000  -0.64222269
  0.40560000   0.64222408
  0.40560000  -0.64222269
  0.40560000   0.64222407
  0.40560000  -0.64222269
  0.40560000   0.64222407
  0.40560000  -0.64222269
  0.40560000   0.64222407
  0.40560000  -0.64222269
  0.40560000   0.64222407
  0.40560000  -0.64222269
  0.40560000   0.64222407
  0.40560000  -0.64222269
  0.40560000   0.64222407
  0.40560000  -0.64222269
  0.40560000   0.64222407
  0.40560000  -0.64222270
  0.40560000   0.64222406
  0.40560000  -0.64222270
  0.40560000   0.64222406
  0.40560000  -0.64222270
  0.40560000   0.64222406
  0.40560000  -0.64222270
  0.40560000   0.64222406
  0.40560000  -0.64222270
  0.40560000   0.64222406
  0.40560000  -0.64222270
  0.40560000   0.64222406
  0.40560000  -0.64222270
  0.40560000   0.64222406
  0.40560000  -0.64222271
  0.40560000   0.64222405
  0.40640000  -0.64201723
  0.40640000   0.64201863
  0.40640000  -0.64201724
  0.40640000   0.64201863
  0.40640000  -0.64201724
  0.40640000   0.64201863
  0.40640000  -0.64201724
  0.40640000   0.64201863
  0.40640000  -0.64201724
  0.40640000   0.64201863
  0.40640000  -0.64201724
  0.40640000   0.64201862
  0.40640000  -0.64201724
  0.40640000   0.64201862
  0.40640000  -0.64201724
  0.40640000   0.64201862
  0.40640000  -0.64201725
  0.40640000   0.64201862
  0.40640000  -0.64201725
  0.40640000   0.64201862
  0.40640000  -0.64201725
  0.40640000   0.64201862
  0.40640000  -0.64201725
  0.40640000   0.64201862
  0.40640000  -0.64201725
  0.40640000   0.64201861
  0.40640000  -0.64201725
  0.40640000   0.64201861
  0.40640000  -0.64201725
  0.40640000   0.64201861
  0.40640000  -0.64201726
  0.40640000   0.64201861
  0.40640000  -0.64201726
  0.40640000   0.64201861
  0.40640000  -0.64201726
  0.40640000   0.64201861
  0.40640000  -0.64201726
  0.40640000   0.64201861
  0.40640000  -0.64201726
  0.40640000   0.64201861
  0.40720000  -0.64181152
  0.40720000   0.64181291
  0.40720000  -0.64181152
  0.40720000   0.64181291
  0.40720000  -0.64181152
  0.40720000   0.64181291
  0.40720000  -0.64181153
  0.40720000   0.64181291
  0.40720000  -0.64181153
  0.40720000   0.64181291
  0.40720000  -0.64181153
  0.40720000   0.64181291
  0.40720000  -0.64181153
  0.40720000   0.64181290
  0.40720000  -0.64181153
  0.40720000   0.64181290
  0.40720000  -0.64181153
  0.40720000   0.64181290
  0.40720000  -0.64181153
  0.40720000   0.64181290
  0.40720000  -0.64181153
  0.40720000   0.64181290
  0.40720000  -0.64181154
  0.40720000   0.64181290
  0.40720000  -0.64181154
  0.40720000   0.64181290
  0.40720000  -0.64181154
  0.40720000   0.64181289
  0.40720000  -0.64181154
  0.40720000   0.64181289
  0.40720000  -0.64181154
  0.40720000   0.64181289
  0.40720000  -0.64181154
  0.40720000   0.64181289
  0.40720000  -0.64181154
  0.40720000   0.64181289
  0.40720000  -0.64181155
  0.40720000   0.64181289
  0.40720000  -0.64181155
  0.40720000   0.64181289
  0.40800000  -0.64160554
  0.40800000   0.64160692
  0.40800000  -0.64160554
  0.40800000   0.64160692
  0.40800000  -0.64160554
  0.40800000   0.64160692
  0.40800000  -0.64160554
  0.40800000   0.64160692
  0.40800000  -0.64160554
  0.40800000   0.64160692
  0.40800000  -0.64160554
  0.40800000   0.64160692
  0.40800000  -0.64160555
  0.40800000   0.64160691
  0.40800000  -0.64160555
  0.40800000   0.64160691
  0.40800000  -0.64160555
  0.40800000   0.64160691
  0.40800000  -0.64160555
  0.40800000   0.64160691
  0.40800000  -0.64160555
  0.40800000   0.64160691
  0.40800000  -0.64160555
  0.40800000   0.64160691
  0.40800000  -0.64160555
  0.40800000   0.64160691
  0.40800000  -0.64160556
  0.40800000   0.64160691
  0.40800000  -0.64160556
  0.40800000   0.64160690
  0.40800000  -0.64160556
  0.40800000   0.64160690
  0.40800000  -0.64160556
  0.40800000   0.64160690
  0.40800000  -0.64160556
  0.40800000   0.64160690
  0.40800000  -0.64160556
  0.40800000   0.64160690
  0.40800000  -0.64160556
  0.40800000   0.64160690
  0.40880000  -0.64139928
  0.40880000   0.64140066
  0.40880000  -0.64139928
  0.40880000   0.64140066
  0.40880000  -0.64139929
  0.40880000   0.64140066
  0.40880000  -0.64139929
  0.40880000   0.64140066
  0.40880000  -0.64139929
  0.40880000   0.64140066
  0.40880000  -0.64139929
  0.40880000   0.64140066
  0.40880000  -0.64139929
  0.40880000   0.64140066
  0.40880000  -0.64139929
  0.40880000   0.64140065
  0.40880000  -0.64139929
  0.40880000   0.64140065
  0.40880000  -0.64139930
  0.40880000   0.64140065
  0.40880000  -0.64139930
  0.40880000   0.64140065
  0.40880000  -0.64139930
  0.40880000   0.64140065
  0.40880000  -0.64139930
  0.40880000   0.64140065
  0.40880000  -0.64139930
  0.40880000   0.64140065
  0.40880000  -0.64139930
  0.40880000   0.64140064
  0.40880000  -0.64139930
  0.40880000   0.64140064
  0.40880000  -0.64139931
  0.40880000   0.64140064
  0.40880000  -0.64139931
  0.40880000   0.64140064
  0.40880000  -0.64139931
  0.40880000   0.64140064
  0.40880000  -0.64139931
  0.40880000   0.64140064
  0.40960000  -0.64119276
  0.40960000   0.64119413
  0.40960000  -0.64119276
  0.40960000   0.64119413
  0.40960000  -0.64119276
  0.40960000   0.64119413
  0.40960000  -0.64119276
  0.40960000   0.64119413
  0.40960000  -0.64119276
  0.40960000   0.64119413
  0.40960000  -0.64119276
  0.40960000   0.64119413
  0.40960000  -0.64119277
  0.40960000   0.64119413
  0.40960000  -0.64119277
  0.40960000   0.64119412
  0.40960000  -0.64119277
  0.40960000   0.64119412
  0.40960000  -0.64119277
  0.40960000   0.64119412
  0.40960000  -0.64119277
  0.40960000   0.64119412
  0.40960000  -0.64119277
  0.40960000   0.64119412
  0.40960000  -0.64119277
  0.40960000   0.64119412
  0.40960000  -0.64119278
  0.40960000   0.64119412
  0.40960000  -0.64119278
  0.40960000   0.64119411
  0.40960000  -0.64119278
  0.40960000   0.64119411
  0.40960000  -0.64119278
  0.40960000   0.64119411
  0.40960000  -0.64119278
  0.40960000   0.64119411
  0.40960000  -0.64119278
  0.40960000   0.64119411
  0.40960000  -0.64119278
  0.40960000   0.64119411
  0.41040000  -0.64098596
  0.41040000   0.64098733
  0.41040000  -0.64098596
  0.41040000   0.64098733
  0.41040000  -0.64098596
  0.41040000   0.64098733
  0.41040000  -0.64098597
  0.41040000   0.64098733
  0.41040000  -0.64098597
  0.41040000   0.64098733
  0.41040000  -0.64098597
  0.41040000   0.64098733
  0.41040000  -0.64098597
  0.41040000   0.64098732
  0.41040000  -0.64098597
  0.41040000   0.64098732
  0.41040000  -0.64098597
  0.41040000   0.64098732
  0.41040000  -0.64098597
  0.41040000   0.64098732
  0.41040000  -0.64098598
  0.41040000   0.64098732
  0.41040000  -0.64098598
  0.41040000   0.64098732
  0.41040000  -0.64098598
  0.41040000   0.64098732
  0.41040000  -0.64098598
  0.41040000   0.64098731
  0.41040000  -0.64098598
  0.41040000   0.64098731
  0.41040000  -0.64098598
  0.41040000   0.64098731
  0.41040000  -0.64098598
  0.41040000   0.64098731
  0.41040000  -0.64098598
  0.41040000   0.64098731
  0.41040000  -0.64098599
  0.41040000   0.64098731
  0.41040000  -0.64098599
  0.41040000   0.64098731
  0.41120000  -0.64077889
  0.41120000   0.64078026
  0.41120000  -0.64077889
  0.41120000   0.64078026
  0.41120000  -0.64077890
  0.41120000   0.64078026
  0.41120000  -0.64077890
  0.41120000   0.64078025
  0.41120000  -0.64077890
  0.41120000   0.64078025
  0.41120000  -0.64077890
  0.41120000   0.64078025
  0.41120000  -0.64077890
  0.41120000   0.64078025
  0.41120000  -0.64077890
  0.41120000   0.64078025
  0.41120000  -0.64077890
  0.41120000   0.64078025
  0.41120000  -0.64077891
  0.41120000   0.64078025
  0.41120000  -0.64077891
  0.41120000   0.64078024
  0.41120000  -0.64077891
  0.41120000   0.64078024
  0.41120000  -0.64077891
  0.41120000   0.64078024
  0.41120000  -0.64077891
  0.41120000   0.64078024
  0.41120000  -0.64077891
  0.41120000   0.64078024
  0.41120000  -0.64077891
  0.41120000   0.64078024
  0.41120000  -0.64077891
  0.41120000   0.64078024
  0.41120000  -0.64077892
  0.41120000   0.64078023
  0.41120000  -0.64077892
  0.41120000   0.64078023
  0.41120000  -0.64077892
  0.41120000   0.64078023
  0.41200000  -0.64057155
  0.41200000   0.64057291
  0.41200000  -0.64057155
  0.41200000   0.64057291
  0.41200000  -0.64057155
  0.41200000   0.64057291
  0.41200000  -0.64057156
  0.41200000   0.64057291
  0.41200000  -0.64057156
  0.41200000   0.64057291
  0.41200000  -0.64057156
  0.41200000   0.64057290
  0.41200000  -0.64057156
  0.41200000   0.64057290
  0.41200000  -0.64057156
  0.41200000   0.64057290
  0.41200000  -0.64057156
  0.41200000   0.64057290
  0.41200000  -0.64057156
  0.41200000   0.64057290
  0.41200000  -0.64057156
  0.41200000   0.64057290
  0.41200000  -0.64057157
  0.41200000   0.64057290
  0.41200000  -0.64057157
  0.41200000   0.64057290
  0.41200000  -0.64057157
  0.41200000   0.64057289
  0.41200000  -0.64057157
  0.41200000   0.64057289
  0.41200000  -0.64057157
  0.41200000   0.64057289
  0.41200000  -0.64057157
  0.41200000   0.64057289
  0.41200000  -0.64057157
  0.41200000   0.64057289
  0.41200000  -0.64057158
  0.41200000   0.64057289
  0.41200000  -0.64057158
  0.41200000   0.64057289
  0.41280000  -0.64036394
  0.41280000   0.64036529
  0.41280000  -0.64036394
  0.41280000   0.64036529
  0.41280000  -0.64036394
  0.41280000   0.64036529
  0.41280000  -0.64036394
  0.41280000   0.64036529
  0.41280000  -0.64036394
  0.41280000   0.64036529
  0.41280000  -0.64036394
  0.41280000   0.64036528
  0.41280000  -0.64036394
  0.41280000   0.64036528
  0.41280000  -0.64036395
  0.41280000   0.64036528
  0.41280000  -0.64036395
  0.41280000   0.64036528
  0.41280000  -0.64036395
  0.41280000   0.64036528
  0.41280000  -0.64036395
  0.41280000   0.64036528
  0.41280000  -0.64036395
  0.41280000   0.64036528
  0.41280000  -0.64036395
  0.41280000   0.64036528
  0.41280000  -0.64036395
  0.41280000   0.64036527
  0.41280000  -0.64036396
  0.41280000   0.64036527
  0.41280000  -0.64036396
  0.41280000   0.64036527
  0.41280000  -0.64036396
  0.41280000   0.64036527
  0.41280000  -0.64036396
  0.41280000   0.64036527
  0.41280000  -0.64036396
  0.41280000   0.64036527
  0.41280000  -0.64036396
  0.41280000   0.64036527
  0.41360000  -0.64015605
  0.41360000   0.64015740
  0.41360000  -0.64015605
  0.41360000   0.64015740
  0.41360000  -0.64015605
  0.41360000   0.64015740
  0.41360000  -0.64015605
  0.41360000   0.64015739
  0.41360000  -0.64015605
  0.41360000   0.64015739
  0.41360000  -0.64015606
  0.41360000   0.64015739
  0.41360000  -0.64015606
  0.41360000   0.64015739
  0.41360000  -0.64015606
  0.41360000   0.64015739
  0.41360000  -0.64015606
  0.41360000   0.64015739
  0.41360000  -0.64015606
  0.41360000   0.64015739
  0.41360000  -0.64015606
  0.41360000   0.64015738
  0.41360000  -0.64015606
  0.41360000   0.64015738
  0.41360000  -0.64015606
  0.41360000   0.64015738
  0.41360000  -0.64015607
  0.41360000   0.64015738
  0.41360000  -0.64015607
  0.41360000   0.64015738
  0.41360000  -0.64015607
  0.41360000   0.64015738
  0.41360000  -0.64015607
  0.41360000   0.64015738
  0.41360000  -0.64015607
  0.41360000   0.64015738
  0.41360000  -0.64015607
  0.41360000   0.64015737
  0.41360000  -0.64015607
  0.41360000   0.64015737
  0.41440000  -0.63994789
  0.41440000   0.63994923
  0.41440000  -0.63994789
  0.41440000   0.63994923
  0.41440000  -0.63994789
  0.41440000   0.63994923
  0.41440000  -0.63994789
  0.41440000   0.63994923
  0.41440000  -0.63994789
  0.41440000   0.63994922
  0.41440000  -0.63994789
  0.41440000   0.63994922
  0.41440000  -0.63994789
  0.41440000   0.63994922
  0.41440000  -0.63994789
  0.41440000   0.63994922
  0.41440000  -0.63994790
  0.41440000   0.63994922
  0.41440000  -0.63994790
  0.41440000   0.63994922
  0.41440000  -0.63994790
  0.41440000   0.63994922
  0.41440000  -0.63994790
  0.41440000   0.63994922
  0.41440000  -0.63994790
  0.41440000   0.63994921
  0.41440000  -0.63994790
  0.41440000   0.63994921
  0.41440000  -0.63994790
  0.41440000   0.63994921
  0.41440000  -0.63994791
  0.41440000   0.63994921
  0.41440000  -0.63994791
  0.41440000   0.63994921
  0.41440000  -0.63994791
  0.41440000   0.63994921
  0.41440000  -0.63994791
  0.41440000   0.63994921
  0.41440000  -0.63994791
  0.41440000   0.63994920
  0.41520000  -0.63973945
  0.41520000   0.63974079
  0.41520000  -0.63973945
  0.41520000   0.63974079
  0.41520000  -0.63973945
  0.41520000   0.63974078
  0.41520000  -0.63973945
  0.41520000   0.63974078
  0.41520000  -0.63973945
  0.41520000   0.63974078
  0.41520000  -0.63973945
  0.41520000   0.63974078
  0.41520000  -0.63973946
  0.41520000   0.63974078
  0.41520000  -0.63973946
  0.41520000   0.63974078
  0.41520000  -0.63973946
  0.41520000   0.63974078
  0.41520000  -0.63973946
  0.41520000   0.63974078
  0.41520000  -0.63973946
  0.41520000   0.63974077
  0.41520000  -0.63973946
  0.41520000   0.63974077
  0.41520000  -0.63973946
  0.41520000   0.63974077
  0.41520000  -0.63973946
  0.41520000   0.63974077
  0.41520000  -0.63973947
  0.41520000   0.63974077
  0.41520000  -0.63973947
  0.41520000   0.63974077
  0.41520000  -0.63973947
  0.41520000   0.63974077
  0.41520000  -0.63973947
  0.41520000   0.63974076
  0.41520000  -0.63973947
  0.41520000   0.63974076
  0.41520000  -0.63973947
  0.41520000   0.63974076
  0.41600000  -0.63953073
  0.41600000   0.63953207
  0.41600000  -0.63953074
  0.41600000   0.63953207
  0.41600000  -0.63953074
  0.41600000   0.63953207
  0.41600000  -0.63953074
  0.41600000   0.63953206
  0.41600000  -0.63953074
  0.41600000   0.63953206
  0.41600000  -0.63953074
  0.41600000   0.63953206
  0.41600000  -0.63953074
  0.41600000   0.63953206
  0.41600000  -0.63953074
  0.41600000   0.63953206
  0.41600000  -0.63953074
  0.41600000   0.63953206
  0.41600000  -0.63953075
  0.41600000   0.63953206
  0.41600000  -0.63953075
  0.41600000   0.63953206
  0.41600000  -0.63953075
  0.41600000   0.63953205
  0.41600000  -0.63953075
  0.41600000   0.63953205
  0.41600000  -0.63953075
  0.41600000   0.63953205
  0.41600000  -0.63953075
  0.41600000   0.63953205
  0.41600000  -0.63953075
  0.41600000   0.63953205
  0.41600000  -0.63953076
  0.41600000   0.63953205
  0.41600000  -0.63953076
  0.41600000   0.63953205
  0.41600000  -0.63953076
  0.41600000   0.63953204
  0.41600000  -0.63953076
  0.41600000   0.63953204
  0.41680000  -0.63932174
  0.41680000   0.63932307
  0.41680000  -0.63932175
  0.41680000   0.63932307
  0.41680000  -0.63932175
  0.41680000   0.63932307
  0.41680000  -0.63932175
  0.41680000   0.63932307
  0.41680000  -0.63932175
  0.41680000   0.63932307
  0.41680000  -0.63932175
  0.41680000   0.63932307
  0.41680000  -0.63932175
  0.41680000   0.63932307
  0.41680000  -0.63932175
  0.41680000   0.63932306
  0.41680000  -0.63932176
  0.41680000   0.63932306
  0.41680000  -0.63932176
  0.41680000   0.63932306
  0.41680000  -0.63932176
  0.41680000   0.63932306
  0.41680000  -0.63932176
  0.41680000   0.63932306
  0.41680000  -0.63932176
  0.41680000   0.63932306
  0.41680000  -0.63932176
  0.41680000   0.63932306
  0.41680000  -0.63932176
  0.41680000   0.63932306
  0.41680000  -0.63932176
  0.41680000   0.63932305
  0.41680000  -0.63932177
  0.41680000   0.63932305
  0.41680000  -0.63932177
  0.41680000   0.63932305
  0.41680000  -0.63932177
  0.41680000   0.63932305
  0.41680000  -0.63932177
  0.41680000   0.63932305
  0.41760000  -0.63911248
  0.41760000   0.63911380
  0.41760000  -0.63911248
  0.41760000   0.63911380
  0.41760000  -0.63911248
  0.41760000   0.63911380
  0.41760000  -0.63911248
  0.41760000   0.63911380
  0.41760000  -0.63911248
  0.41760000   0.63911380
  0.41760000  -0.63911249
  0.41760000   0.63911380
  0.41760000  -0.63911249
  0.41760000   0.63911379
  0.41760000  -0.63911249
  0.41760000   0.63911379
  0.41760000  -0.63911249
  0.41760000   0.63911379
  0.41760000  -0.63911249
  0.41760000   0.63911379
  0.41760000  -0.63911249
  0.41760000   0.63911379
  0.41760000  -0.63911249
  0.41760000   0.63911379
  0.41760000  -0.63911249
  0.41760000   0.63911379
  0.41760000  -0.63911250
  0.41760000   0.63911379
  0.41760000  -0.63911250
  0.41760000   0.63911378
  0.41760000  -0.63911250
  0.41760000   0.63911378
  0.41760000  -0.63911250
  0.41760000   0.63911378
  0.41760000  -0.63911250
  0.41760000   0.63911378
  0.41760000  -0.63911250
  0.41760000   0.63911378
  0.41760000  -0.63911250
  0.41760000   0.63911378
  0.41840000  -0.63890293
  0.41840000   0.63890425
  0.41840000  -0.63890294
  0.41840000   0.63890425
  0.41840000  -0.63890294
  0.41840000   0.63890425
  0.41840000  -0.63890294
  0.41840000   0.63890425
  0.41840000  -0.63890294
  0.41840000   0.63890425
  0.41840000  -0.63890294
  0.41840000   0.63890425
  0.41840000  -0.63890294
  0.41840000   0.63890425
  0.41840000  -0.63890294
  0.41840000   0.63890425
  0.41840000  -0.63890295
  0.41840000   0.63890424
  0.41840000  -0.63890295
  0.41840000   0.63890424
  0.41840000  -0.63890295
  0.41840000   0.63890424
  0.41840000  -0.63890295
  0.41840000   0.63890424
  0.41840000  -0.63890295
  0.41840000   0.63890424
  0.41840000  -0.63890295
  0.41840000   0.63890424
  0.41840000  -0.63890295
  0.41840000   0.63890424
  0.41840000  -0.63890295
  0.41840000   0.63890423
  0.41840000  -0.63890296
  0.41840000   0.63890423
  0.41840000  -0.63890296
  0.41840000   0.63890423
  0.41840000  -0.63890296
  0.41840000   0.63890423
  0.41840000  -0.63890296
  0.41840000   0.63890423
  0.41920000  -0.63869311
  0.41920000   0.63869443
  0.41920000  -0.63869311
  0.41920000   0.63869443
  0.41920000  -0.63869312
  0.41920000   0.63869443
  0.41920000  -0.63869312
  0.41920000   0.63869442
  0.41920000  -0.63869312
  0.41920000   0.63869442
  0.41920000  -0.63869312
  0.41920000   0.63869442
  0.41920000  -0.63869312
  0.41920000   0.63869442
  0.41920000  -0.63869312
  0.41920000   0.63869442
  0.41920000  -0.63869312
  0.41920000   0.63869442
  0.41920000  -0.63869313
  0.41920000   0.63869442
  0.41920000  -0.63869313
  0.41920000   0.63869441
  0.41920000  -0.63869313
  0.41920000   0.63869441
  0.41920000  -0.63869313
  0.41920000   0.63869441
  0.41920000  -0.63869313
  0.41920000   0.63869441
  0.41920000  -0.63869313
  0.41920000   0.63869441
  0.41920000  -0.63869313
  0.41920000   0.63869441
  0.41920000  -0.63869313
  0.41920000   0.63869441
  0.41920000  -0.63869314
  0.41920000   0.63869441
  0.41920000  -0.63869314
  0.41920000   0.63869440
  0.41920000  -0.63869314
  0.41920000   0.63869440
  0.42000000  -0.63848301
  0.42000000   0.63848432
  0.42000000  -0.63848302
  0.42000000   0.63848432
  0.42000000  -0.63848302
  0.42000000   0.63848432
  0.42000000  -0.63848302
  0.42000000   0.63848432
  0.42000000  -0.63848302
  0.42000000   0.63848432
  0.42000000  -0.63848302
  0.42000000   0.63848432
  0.42000000  -0.63848302
  0.42000000   0.63848432
  0.42000000  -0.63848302
  0.42000000   0.63848431
  0.42000000  -0.63848302
  0.42000000   0.63848431
  0.42000000  -0.63848303
  0.42000000   0.63848431
  0.42000000  -0.63848303
  0.42000000   0.63848431
  0.42000000  -0.63848303
  0.42000000   0.63848431
  0.42000000  -0.63848303
  0.42000000   0.63848431
  0.42000000  -0.63848303
  0.42000000   0.63848431
  0.42000000  -0.63848303
  0.42000000   0.63848430
  0.42000000  -0.63848303
  0.42000000   0.63848430
  0.42000000  -0.63848303
  0.42000000   0.63848430
  0.42000000  -0.63848304
  0.42000000   0.63848430
  0.42000000  -0.63848304
  0.42000000   0.63848430
  0.42000000  -0.63848304
  0.42000000   0.63848430
  0.42080000  -0.63827263
  0.42080000   0.63827394
  0.42080000  -0.63827264
  0.42080000   0.63827394
  0.42080000  -0.63827264
  0.42080000   0.63827394
  0.42080000  -0.63827264
  0.42080000   0.63827394
  0.42080000  -0.63827264
  0.42080000   0.63827393
  0.42080000  -0.63827264
  0.42080000   0.63827393
  0.42080000  -0.63827264
  0.42080000   0.63827393
  0.42080000  -0.63827264
  0.42080000   0.63827393
  0.42080000  -0.63827265
  0.42080000   0.63827393
  0.42080000  -0.63827265
  0.42080000   0.63827393
  0.42080000  -0.63827265
  0.42080000   0.63827393
  0.42080000  -0.63827265
  0.42080000   0.63827392
  0.42080000  -0.63827265
  0.42080000   0.63827392
  0.42080000  -0.63827265
  0.42080000   0.63827392
  0.42080000  -0.63827265
  0.42080000   0.63827392
  0.42080000  -0.63827265
  0.42080000   0.63827392
  0.42080000  -0.63827266
  0.42080000   0.63827392
  0.42080000  -0.63827266
  0.42080000   0.63827392
  0.42080000  -0.63827266
  0.42080000   0.63827392
  0.42080000  -0.63827266
  0.42080000   0.63827391
  0.42160000  -0.63806198
  0.42160000   0.63806328
  0.42160000  -0.63806198
  0.42160000   0.63806327
  0.42160000  -0.63806198
  0.42160000   0.63806327
  0.42160000  -0.63806198
  0.42160000   0.63806327
  0.42160000  -0.63806198
  0.42160000   0.63806327
  0.42160000  -0.63806198
  0.42160000   0.63806327
  0.42160000  -0.63806198
  0.42160000   0.63806327
  0.42160000  -0.63806199
  0.42160000   0.63806327
  0.42160000  -0.63806199
  0.42160000   0.63806327
  0.42160000  -0.63806199
  0.42160000   0.63806326
  0.42160000  -0.63806199
  0.42160000   0.63806326
  0.42160000  -0.63806199
  0.42160000   0.63806326
  0.42160000  -0.63806199
  0.42160000   0.63806326
  0.42160000  -0.63806199
  0.42160000   0.63806326
  0.42160000  -0.63806199
  0.42160000   0.63806326
  0.42160000  -0.63806200
  0.42160000   0.63806326
  0.42160000  -0.63806200
  0.42160000   0.63806325
  0.42160000  -0.63806200
  0.42160000   0.63806325
  0.42160000  -0.63806200
  0.42160000   0.63806325
  0.42160000  -0.63806200
  0.42160000   0.63806325
  0.42240000  -0.63785104
  0.42240000   0.63785233
  0.42240000  -0.63785104
  0.42240000   0.63785233
  0.42240000  -0.63785104
  0.42240000   0.63785233
  0.42240000  -0.63785104
  0.42240000   0.63785233
  0.42240000  -0.63785104
  0.42240000   0.63785233
  0.42240000  -0.63785104
  0.42240000   0.63785233
  0.42240000  -0.63785105
  0.42240000   0.63785232
  0.42240000  -0.63785105
  0.42240000   0.63785232
  0.42240000  -0.63785105
  0.42240000   0.63785232
  0.42240000  -0.63785105
  0.42240000   0.63785232
  0.42240000  -0.63785105
  0.42240000   0.63785232
  0.42240000  -0.63785105
  0.42240000   0.63785232
  0.42240000  -0.63785105
  0.42240000   0.63785232
  0.42240000  -0.63785105
  0.42240000   0.63785231
  0.42240000  -0.63785106
  0.42240000   0.63785231
  0.42240000  -0.63785106
  0.42240000   0.63785231
  0.42240000  -0.63785106
  0.42240000   0.63785231
  0.42240000  -0.63785106
  0.42240000   0.63785231
  0.42240000  -0.63785106
  0.42240000   0.63785231
  0.42240000  -0.63785106
  0.42240000   0.63785231
  0.42320000  -0.63763982
  0.42320000   0.63764111
  0.42320000  -0.63763982
  0.42320000   0.63764111
  0.42320000  -0.63763982
  0.42320000   0.63764110
  0.42320000  -0.63763982
  0.42320000   0.63764110
  0.42320000  -0.63763982
  0.42320000   0.63764110
  0.42320000  -0.63763982
  0.42320000   0.63764110
  0.42320000  -0.63763983
  0.42320000   0.63764110
  0.42320000  -0.63763983
  0.42320000   0.63764110
  0.42320000  -0.63763983
  0.42320000   0.63764110
  0.42320000  -0.63763983
  0.42320000   0.63764110
  0.42320000  -0.63763983
  0.42320000   0.63764109
  0.42320000  -0.63763983
  0.42320000   0.63764109
  0.42320000  -0.63763983
  0.42320000   0.63764109
  0.42320000  -0.63763983
  0.42320000   0.63764109
  0.42320000  -0.63763984
  0.42320000   0.63764109
  0.42320000  -0.63763984
  0.42320000   0.63764109
  0.42320000  -0.63763984
  0.42320000   0.63764109
  0.42320000  -0.63763984
  0.42320000   0.63764109
  0.42320000  -0.63763984
  0.42320000   0.63764108
  0.42320000  -0.63763984
  0.42320000   0.63764108
  0.42400000  -0.63742832
  0.42400000   0.63742960
  0.42400000  -0.63742832
  0.42400000   0.63742960
  0.42400000  -0.63742832
  0.42400000   0.63742960
  0.42400000  -0.63742832
  0.42400000   0.63742960
  0.42400000  -0.63742832
  0.42400000   0.63742960
  0.42400000  -0.63742832
  0.42400000   0.63742959
  0.42400000  -0.63742832
  0.42400000   0.63742959
  0.42400000  -0.63742833
  0.42400000   0.63742959
  0.42400000  -0.63742833
  0.42400000   0.63742959
  0.42400000  -0.63742833
  0.42400000   0.63742959
  0.42400000  -0.63742833
  0.42400000   0.63742959
  0.42400000  -0.63742833
  0.42400000   0.63742959
  0.42400000  -0.63742833
  0.42400000   0.63742959
  0.42400000  -0.63742833
  0.42400000   0.63742958
  0.42400000  -0.63742834
  0.42400000   0.63742958
  0.42400000  -0.63742834
  0.42400000   0.63742958
  0.42400000  -0.63742834
  0.42400000   0.63742958
  0.42400000  -0.63742834
  0.42400000   0.63742958
  0.42400000  -0.63742834
  0.42400000   0.63742958
  0.42400000  -0.63742834
  0.42400000   0.63742958
  0.42480000  -0.63721653
  0.42480000   0.63721781
  0.42480000  -0.63721654
  0.42480000   0.63721781
  0.42480000  -0.63721654
  0.42480000   0.63721781
  0.42480000  -0.63721654
  0.42480000   0.63721781
  0.42480000  -0.63721654
  0.42480000   0.63721781
  0.42480000  -0.63721654
  0.42480000   0.63721781
  0.42480000  -0.63721654
  0.42480000   0.63721781
  0.42480000  -0.63721654
  0.42480000   0.63721780
  0.42480000  -0.63721654
  0.42480000   0.63721780
  0.42480000  -0.63721655
  0.42480000   0.63721780
  0.42480000  -0.63721655
  0.42480000   0.63721780
  0.42480000  -0.63721655
  0.42480000   0.63721780
  0.42480000  -0.63721655
  0.42480000   0.63721780
  0.42480000  -0.63721655
  0.42480000   0.63721780
  0.42480000  -0.63721655
  0.42480000   0.63721780
  0.42480000  -0.63721655
  0.42480000   0.63721779
  0.42480000  -0.63721655
  0.42480000   0.63721779
  0.42480000  -0.63721656
  0.42480000   0.63721779
  0.42480000  -0.63721656
  0.42480000   0.63721779
  0.42480000  -0.63721656
  0.42480000   0.63721779
  0.42560000  -0.63700447
  0.42560000   0.63700574
  0.42560000  -0.63700447
  0.42560000   0.63700574
  0.42560000  -0.63700447
  0.42560000   0.63700574
  0.42560000  -0.63700447
  0.42560000   0.63700574
  0.42560000  -0.63700447
  0.42560000   0.63700574
  0.42560000  -0.63700447
  0.42560000   0.63700574
  0.42560000  -0.63700448
  0.42560000   0.63700573
  0.42560000  -0.63700448
  0.42560000   0.63700573
  0.42560000  -0.63700448
  0.42560000   0.63700573
  0.42560000  -0.63700448
  0.42560000   0.63700573
  0.42560000  -0.63700448
  0.42560000   0.63700573
  0.42560000  -0.63700448
  0.42560000   0.63700573
  0.42560000  -0.63700448
  0.42560000   0.63700573
  0.42560000  -0.63700448
  0.42560000   0.63700573
  0.42560000  -0.63700449
  0.42560000   0.63700572
  0.42560000  -0.63700449
  0.42560000   0.63700572
  0.42560000  -0.63700449
  0.42560000   0.63700572
  0.42560000  -0.63700449
  0.42560000   0.63700572
  0.42560000  -0.63700449
  0.42560000   0.63700572
  0.42560000  -0.63700449
  0.42560000   0.63700572
  0.42640000  -0.63679212
  0.42640000   0.63679339
  0.42640000  -0.63679212
  0.42640000   0.63679339
  0.42640000  -0.63679212
  0.42640000   0.63679339
  0.42640000  -0.63679212
  0.42640000   0.63679338
  0.42640000  -0.63679212
  0.42640000   0.63679338
  0.42640000  -0.63679213
  0.42640000   0.63679338
  0.42640000  -0.63679213
  0.42640000   0.63679338
  0.42640000  -0.63679213
  0.42640000   0.63679338
  0.42640000  -0.63679213
  0.42640000   0.63679338
  0.42640000  -0.63679213
  0.42640000   0.63679338
  0.42640000  -0.63679213
  0.42640000   0.63679338
  0.42640000  -0.63679213
  0.42640000   0.63679337
  0.42640000  -0.63679213
  0.42640000   0.63679337
  0.42640000  -0.63679214
  0.42640000   0.63679337
  0.42640000  -0.63679214
  0.42640000   0.63679337
  0.42640000  -0.63679214
  0.42640000   0.63679337
  0.42640000  -0.63679214
  0.42640000   0.63679337
  0.42640000  -0.63679214
  0.42640000   0.63679337
  0.42640000  -0.63679214
  0.42640000   0.63679337
  0.42640000  -0.63679214
  0.42640000   0.63679336
  0.42720000  -0.63657949
  0.42720000   0.63658075
  0.42720000  -0.63657949
  0.42720000   0.63658075
  0.42720000  -0.63657949
  0.42720000   0.63658075
  0.42720000  -0.63657949
  0.42720000   0.63658075
  0.42720000  -0.63657949
  0.42720000   0.63658075
  0.42720000  -0.63657949
  0.42720000   0.63658074
  0.42720000  -0.63657949
  0.42720000   0.63658074
  0.42720000  -0.63657950
  0.42720000   0.63658074
  0.42720000  -0.63657950
  0.42720000   0.63658074
  0.42720000  -0.63657950
  0.42720000   0.63658074
  0.42720000  -0.63657950
  0.42720000   0.63658074
  0.42720000  -0.63657950
  0.42720000   0.63658074
  0.42720000  -0.63657950
  0.42720000   0.63658074
  0.42720000  -0.63657950
  0.42720000   0.63658073
  0.42720000  -0.63657950
  0.42720000   0.63658073
  0.42720000  -0.63657951
  0.42720000   0.63658073
  0.42720000  -0.63657951
  0.42720000   0.63658073
  0.42720000  -0.63657951
  0.42720000   0.63658073
  0.42720000  -0.63657951
  0.42720000   0.63658073
  0.42720000  -0.63657951
  0.42720000   0.63658073
  0.42800000  -0.63636657
  0.42800000   0.63636783
  0.42800000  -0.63636657
  0.42800000   0.63636783
  0.42800000  -0.63636657
  0.42800000   0.63636783
  0.42800000  -0.63636657
  0.42800000   0.63636783
  0.42800000  -0.63636657
  0.42800000   0.63636782
  0.42800000  -0.63636658
  0.42800000   0.63636782
  0.42800000  -0.63636658
  0.42800000   0.63636782
  0.42800000  -0.63636658
  0.42800000   0.63636782
  0.42800000  -0.63636658
  0.42800000   0.63636782
  0.42800000  -0.63636658
  0.42800000   0.63636782
  0.42800000  -0.63636658
  0.42800000   0.63636782
  0.42800000  -0.63636658
  0.42800000   0.63636782
  0.42800000  -0.63636658
  0.42800000   0.63636781
  0.42800000  -0.63636659
  0.42800000   0.63636781
  0.42800000  -0.63636659
  0.42800000   0.63636781
  0.42800000  -0.63636659
  0.42800000   0.63636781
  0.42800000  -0.63636659
  0.42800000   0.63636781
  0.42800000  -0.63636659
  0.42800000   0.63636781
  0.42800000  -0.63636659
  0.42800000   0.63636781
  0.42800000  -0.63636659
  0.42800000   0.63636781
  0.42880000  -0.63615337
  0.42880000   0.63615462
  0.42880000  -0.63615337
  0.42880000   0.63615462
  0.42880000  -0.63615337
  0.42880000   0.63615462
  0.42880000  -0.63615337
  0.42880000   0.63615462
  0.42880000  -0.63615337
  0.42880000   0.63615462
  0.42880000  -0.63615337
  0.42880000   0.63615462
  0.42880000  -0.63615338
  0.42880000   0.63615461
  0.42880000  -0.63615338
  0.42880000   0.63615461
  0.42880000  -0.63615338
  0.42880000   0.63615461
  0.42880000  -0.63615338
  0.42880000   0.63615461
  0.42880000  -0.63615338
  0.42880000   0.63615461
  0.42880000  -0.63615338
  0.42880000   0.63615461
  0.42880000  -0.63615338
  0.42880000   0.63615461
  0.42880000  -0.63615338
  0.42880000   0.63615461
  0.42880000  -0.63615339
  0.42880000   0.63615460
  0.42880000  -0.63615339
  0.42880000   0.63615460
  0.42880000  -0.63615339
  0.42880000   0.63615460
  0.42880000  -0.63615339
  0.42880000   0.63615460
  0.42880000  -0.63615339
  0.42880000   0.63615460
  0.42880000  -0.63615339
  0.42880000   0.63615460
  0.42960000  -0.63593988
  0.42960000   0.63594113
  0.42960000  -0.63593988
  0.42960000   0.63594113
  0.42960000  -0.63593988
  0.42960000   0.63594113
  0.42960000  -0.63593988
  0.42960000   0.63594113
  0.42960000  -0.63593988
  0.42960000   0.63594112
  0.42960000  -0.63593989
  0.42960000   0.63594112
  0.42960000  -0.63593989
  0.42960000   0.63594112
  0.42960000  -0.63593989
  0.42960000   0.63594112
  0.42960000  -0.63593989
  0.42960000   0.63594112
  0.42960000  -0.63593989
  0.42960000   0.63594112
  0.42960000  -0.63593989
  0.42960000   0.63594112
  0.42960000  -0.63593989
  0.42960000   0.63594112
  0.42960000  -0.63593989
  0.42960000   0.63594111
  0.42960000  -0.63593990
  0.42960000   0.63594111
  0.42960000  -0.63593990
  0.42960000   0.63594111
  0.42960000  -0.63593990
  0.42960000   0.63594111
  0.42960000  -0.63593990
  0.42960000   0.63594111
  0.42960000  -0.63593990
  0.42960000   0.63594111
  0.42960000  -0.63593990
  0.42960000   0.63594111
  0.42960000  -0.63593990
  0.42960000   0.63594111
  0.43040000  -0.63572611
  0.43040000   0.63572735
  0.43040000  -0.63572611
  0.43040000   0.63572735
  0.43040000  -0.63572611
  0.43040000   0.63572735
  0.43040000  -0.63572611
  0.43040000   0.63572735
  0.43040000  -0.63572611
  0.43040000   0.63572735
  0.43040000  -0.63572611
  0.43040000   0.63572734
  0.43040000  -0.63572611
  0.43040000   0.63572734
  0.43040000  -0.63572611
  0.43040000   0.63572734
  0.43040000  -0.63572612
  0.43040000   0.63572734
  0.43040000  -0.63572612
  0.43040000   0.63572734
  0.43040000  -0.63572612
  0.43040000   0.63572734
  0.43040000  -0.63572612
  0.43040000   0.63572734
  0.43040000  -0.63572612
  0.43040000   0.63572734
  0.43040000  -0.63572612
  0.43040000   0.63572733
  0.43040000  -0.63572612
  0.43040000   0.63572733
  0.43040000  -0.63572612
  0.43040000   0.63572733
  0.43040000  -0.63572613
  0.43040000   0.63572733
  0.43040000  -0.63572613
  0.43040000   0.63572733
  0.43040000  -0.63572613
  0.43040000   0.63572733
  0.43040000  -0.63572613
  0.43040000   0.63572733
  0.43120000  -0.63551204
  0.43120000   0.63551328
  0.43120000  -0.63551205
  0.43120000   0.63551328
  0.43120000  -0.63551205
  0.43120000   0.63551328
  0.43120000  -0.63551205
  0.43120000   0.63551328
  0.43120000  -0.63551205
  0.43120000   0.63551328
  0.43120000  -0.63551205
  0.43120000   0.63551328
  0.43120000  -0.63551205
  0.43120000   0.63551328
  0.43120000  -0.63551205
  0.43120000   0.63551328
  0.43120000  -0.63551205
  0.43120000   0.63551327
  0.43120000  -0.63551206
  0.43120000   0.63551327
  0.43120000  -0.63551206
  0.43120000   0.63551327
  0.43120000  -0.63551206
  0.43120000   0.63551327
  0.43120000  -0.63551206
  0.43120000   0.63551327
  0.43120000  -0.63551206
  0.43120000   0.63551327
  0.43120000  -0.63551206
  0.43120000   0.63551327
  0.43120000  -0.63551206
  0.43120000   0.63551327
  0.43120000  -0.63551206
  0.43120000   0.63551326
  0.43120000  -0.63551207
  0.43120000   0.63551326
  0.43120000  -0.63551207
  0.43120000   0.63551326
  0.43120000  -0.63551207
  0.43120000   0.63551326
  0.43200000  -0.63529770
  0.43200000   0.63529893
  0.43200000  -0.63529770
  0.43200000   0.63529893
  0.43200000  -0.63529770
  0.43200000   0.63529893
  0.43200000  -0.63529770
  0.43200000   0.63529893
  0.43200000  -0.63529770
  0.43200000   0.63529893
  0.43200000  -0.63529770
  0.43200000   0.63529892
  0.43200000  -0.63529770
  0.43200000   0.63529892
  0.43200000  -0.63529770
  0.43200000   0.63529892
  0.43200000  -0.63529771
  0.43200000   0.63529892
  0.43200000  -0.63529771
  0.43200000   0.63529892
  0.43200000  -0.63529771
  0.43200000   0.63529892
  0.43200000  -0.63529771
  0.43200000   0.63529892
  0.43200000  -0.63529771
  0.43200000   0.63529892
  0.43200000  -0.63529771
  0.43200000   0.63529891
  0.43200000  -0.63529771
  0.43200000   0.63529891
  0.43200000  -0.63529771
  0.43200000   0.63529891
  0.43200000  -0.63529772
  0.43200000   0.63529891
  0.43200000  -0.63529772
  0.43200000   0.63529891
  0.43200000  -0.63529772
  0.43200000   0.63529891
  0.43200000  -0.63529772
  0.43200000   0.63529891
  0.43280000  -0.63508306
  0.43280000   0.63508429
  0.43280000  -0.63508306
  0.43280000   0.63508429
  0.43280000  -0.63508306
  0.43280000   0.63508429
  0.43280000  -0.63508306
  0.43280000   0.63508429
  0.43280000  -0.63508306
  0.43280000   0.63508428
  0.43280000  -0.63508307
  0.43280000   0.63508428
  0.43280000  -0.63508307
  0.43280000   0.63508428
  0.43280000  -0.63508307
  0.43280000   0.63508428
  0.43280000  -0.63508307
  0.43280000   0.63508428
  0.43280000  -0.63508307
  0.43280000   0.63508428
  0.43280000  -0.63508307
  0.43280000   0.63508428
  0.43280000  -0.63508307
  0.43280000   0.63508428
  0.43280000  -0.63508307
  0.43280000   0.63508427
  0.43280000  -0.63508308
  0.43280000   0.63508427
  0.43280000  -0.63508308
  0.43280000   0.63508427
  0.43280000  -0.63508308
  0.43280000   0.63508427
  0.43280000  -0.63508308
  0.43280000   0.63508427
  0.43280000  -0.63508308
  0.43280000   0.63508427
  0.43280000  -0.63508308
  0.43280000   0.63508427
  0.43280000  -0.63508308
  0.43280000   0.63508427
  0.43360000  -0.63486813
  0.43360000   0.63486936
  0.43360000  -0.63486814
  0.43360000   0.63486936
  0.43360000  -0.63486814
  0.43360000   0.63486936
  0.43360000  -0.63486814
  0.43360000   0.63486936
  0.43360000  -0.63486814
  0.43360000   0.63486935
  0.43360000  -0.63486814
  0.43360000   0.63486935
  0.43360000  -0.63486814
  0.43360000   0.63486935
  0.43360000  -0.63486814
  0.43360000   0.63486935
  0.43360000  -0.63486814
  0.43360000   0.63486935
  0.43360000  -0.63486815
  0.43360000   0.63486935
  0.43360000  -0.63486815
  0.43360000   0.63486935
  0.43360000  -0.63486815
  0.43360000   0.63486935
  0.43360000  -0.63486815
  0.43360000   0.63486934
  0.43360000  -0.63486815
  0.43360000   0.63486934
  0.43360000  -0.63486815
  0.43360000   0.63486934
  0.43360000  -0.63486815
  0.43360000   0.63486934
  0.43360000  -0.63486815
  0.43360000   0.63486934
  0.43360000  -0.63486815
  0.43360000   0.63486934
  0.43360000  -0.63486816
  0.43360000   0.63486934
  0.43360000  -0.63486816
  0.43360000   0.63486934
  0.43440000  -0.63465292
  0.43440000   0.63465414
  0.43440000  -0.63465292
  0.43440000   0.63465414
  0.43440000  -0.63465292
  0.43440000   0.63465414
  0.43440000  -0.63465292
  0.43440000   0.63465414
  0.43440000  -0.63465292
  0.43440000   0.63465413
  0.43440000  -0.63465293
  0.43440000   0.63465413
  0.43440000  -0.63465293
  0.43440000   0.63465413
  0.43440000  -0.63465293
  0.43440000   0.63465413
  0.43440000  -0.63465293
  0.43440000   0.63465413
  0.43440000  -0.63465293
  0.43440000   0.63465413
  0.43440000  -0.63465293
  0.43440000   0.63465413
  0.43440000  -0.63465293
  0.43440000   0.63465413
  0.43440000  -0.63465293
  0.43440000   0.63465413
  0.43440000  -0.63465294
  0.43440000   0.63465412
  0.43440000  -0.63465294
  0.43440000   0.63465412
  0.43440000  -0.63465294
  0.43440000   0.63465412
  0.43440000  -0.63465294
  0.43440000   0.63465412
  0.43440000  -0.63465294
  0.43440000   0.63465412
  0.43440000  -0.63465294
  0.43440000   0.63465412
  0.43440000  -0.63465294
  0.43440000   0.63465412
  0.43520000  -0.63443741
  0.43520000   0.63443863
  0.43520000  -0.63443742
  0.43520000   0.63443863
  0.43520000  -0.63443742
  0.43520000   0.63443863
  0.43520000  -0.63443742
  0.43520000   0.63443863
  0.43520000  -0.63443742
  0.43520000   0.63443863
  0.43520000  -0.63443742
  0.43520000   0.63443862
  0.43520000  -0.63443742
  0.43520000   0.63443862
  0.43520000  -0.63443742
  0.43520000   0.63443862
  0.43520000  -0.63443742
  0.43520000   0.63443862
  0.43520000  -0.63443743
  0.43520000   0.63443862
  0.43520000  -0.63443743
  0.43520000   0.63443862
  0.43520000  -0.63443743
  0.43520000   0.63443862
  0.43520000  -0.63443743
  0.43520000   0.63443862
  0.43520000  -0.63443743
  0.43520000   0.63443861
  0.43520000  -0.63443743
  0.43520000   0.63443861
  0.43520000  -0.63443743
  0.43520000   0.63443861
  0.43520000  -0.63443743
  0.43520000   0.63443861
  0.43520000  -0.63443744
  0.43520000   0.63443861
  0.43520000  -0.63443744
  0.43520000   0.63443861
  0.43520000  -0.63443744
  0.43520000   0.63443861
  0.43600000  -0.63422162
  0.43600000   0.63422283
  0.43600000  -0.63422162
  0.43600000   0.63422283
  0.43600000  -0.63422162
  0.43600000   0.63422283
  0.43600000  -0.63422162
  0.43600000   0.63422283
  0.43600000  -0.63422162
  0.43600000   0.63422283
  0.43600000  -0.63422163
  0.43600000   0.63422282
  0.43600000  -0.63422163
  0.43600000   0.63422282
  0.43600000  -0.63422163
  0.43600000   0.63422282
  0.43600000  -0.63422163
  0.43600000   0.63422282
  0.43600000  -0.63422163
  0.43600000   0.63422282
  0.43600000  -0.63422163
  0.43600000   0.63422282
  0.43600000  -0.63422163
  0.43600000   0.63422282
  0.43600000  -0.63422163
  0.43600000   0.63422282
  0.43600000  -0.63422164
  0.43600000   0.63422281
  0.43600000  -0.63422164
  0.43600000   0.63422281
  0.43600000  -0.63422164
  0.43600000   0.63422281
  0.43600000  -0.63422164
  0.43600000   0.63422281
  0.43600000  -0.63422164
  0.43600000   0.63422281
  0.43600000  -0.63422164
  0.43600000   0.63422281
  0.43600000  -0.63422164
  0.43600000   0.63422281
  0.43680000  -0.63400553
  0.43680000   0.63400674
  0.43680000  -0.63400553
  0.43680000   0.63400674
  0.43680000  -0.63400554
  0.43680000   0.63400674
  0.43680000  -0.63400554
  0.43680000   0.63400674
  0.43680000  -0.63400554
  0.43680000   0.63400673
  0.43680000  -0.63400554
  0.43680000   0.63400673
  0.43680000  -0.63400554
  0.43680000   0.63400673
  0.43680000  -0.63400554
  0.43680000   0.63400673
  0.43680000  -0.63400554
  0.43680000   0.63400673
  0.43680000  -0.63400554
  0.43680000   0.63400673
  0.43680000  -0.63400555
  0.43680000   0.63400673
  0.43680000  -0.63400555
  0.43680000   0.63400673
  0.43680000  -0.63400555
  0.43680000   0.63400672
  0.43680000  -0.63400555
  0.43680000   0.63400672
  0.43680000  -0.63400555
  0.43680000   0.63400672
  0.43680000  -0.63400555
  0.43680000   0.63400672
  0.43680000  -0.63400555
  0.43680000   0.63400672
  0.43680000  -0.63400555
  0.43680000   0.63400672
  0.43680000  -0.63400556
  0.43680000   0.63400672
  0.43680000  -0.63400556
  0.43680000   0.63400672
  0.43760000  -0.63378916
  0.43760000   0.63379036
  0.43760000  -0.63378916
  0.43760000   0.63379036
  0.43760000  -0.63378916
  0.43760000   0.63379035
  0.43760000  -0.63378916
  0.43760000   0.63379035
  0.43760000  -0.63378916
  0.43760000   0.63379035
  0.43760000  -0.63378916
  0.43760000   0.63379035
  0.43760000  -0.63378916
  0.43760000   0.63379035
  0.43760000  -0.63378916
  0.43760000   0.63379035
  0.43760000  -0.63378916
  0.43760000   0.63379035
  0.43760000  -0.63378917
  0.43760000   0.63379035
  0.43760000  -0.63378917
  0.43760000   0.63379034
  0.43760000  -0.63378917
  0.43760000   0.63379034
  0.43760000  -0.63378917
  0.43760000   0.63379034
  0.43760000  -0.63378917
  0.43760000   0.63379034
  0.43760000  -0.63378917
  0.43760000   0.63379034
  0.43760000  -0.63378917
  0.43760000   0.63379034
  0.43760000  -0.63378917
  0.43760000   0.63379034
  0.43760000  -0.63378918
  0.43760000   0.63379034
  0.43760000  -0.63378918
  0.43760000   0.63379033
  0.43760000  -0.63378918
  0.43760000   0.63379033
  0.43840000  -0.63357248
  0.43840000   0.63357368
  0.43840000  -0.63357249
  0.43840000   0.63357368
  0.43840000  -0.63357249
  0.43840000   0.63357368
  0.43840000  -0.63357249
  0.43840000   0.63357368
  0.43840000  -0.63357249
  0.43840000   0.63357368
  0.43840000  -0.63357249
  0.43840000   0.63357367
  0.43840000  -0.63357249
  0.43840000   0.63357367
  0.43840000  -0.63357249
  0.43840000   0.63357367
  0.43840000  -0.63357249
  0.43840000   0.63357367
  0.43840000  -0.63357250
  0.43840000   0.63357367
  0.43840000  -0.63357250
  0.43840000   0.63357367
  0.43840000  -0.63357250
  0.43840000   0.63357367
  0.43840000  -0.63357250
  0.43840000   0.63357367
  0.43840000  -0.63357250
  0.43840000   0.63357367
  0.43840000  -0.63357250
  0.43840000   0.63357366
  0.43840000  -0.63357250
  0.43840000   0.63357366
  0.43840000  -0.63357250
  0.43840000   0.63357366
  0.43840000  -0.63357250
  0.43840000   0.63357366
  0.43840000  -0.63357251
  0.43840000   0.63357366
  0.43840000  -0.63357251
  0.43840000   0.63357366
  0.43920000  -0.63335552
  0.43920000   0.63335671
  0.43920000  -0.63335552
  0.43920000   0.63335671
  0.43920000  -0.63335552
  0.43920000   0.63335671
  0.43920000  -0.63335552
  0.43920000   0.63335671
  0.43920000  -0.63335553
  0.43920000   0.63335671
  0.43920000  -0.63335553
  0.43920000   0.63335671
  0.43920000  -0.63335553
  0.43920000   0.63335671
  0.43920000  -0.63335553
  0.43920000   0.63335670
  0.43920000  -0.63335553
  0.43920000   0.63335670
  0.43920000  -0.63335553
  0.43920000   0.63335670
  0.43920000  -0.63335553
  0.43920000   0.63335670
  0.43920000  -0.63335553
  0.43920000   0.63335670
  0.43920000  -0.63335554
  0.43920000   0.63335670
  0.43920000  -0.63335554
  0.43920000   0.63335670
  0.43920000  -0.63335554
  0.43920000   0.63335670
  0.43920000  -0.63335554
  0.43920000   0.63335669
  0.43920000  -0.63335554
  0.43920000   0.63335669
  0.43920000  -0.63335554
  0.43920000   0.63335669
  0.43920000  -0.63335554
  0.43920000   0.63335669
  0.43920000  -0.63335554
  0.43920000   0.63335669
  0.44000000  -0.63313826
  0.44000000   0.63313945
  0.44000000  -0.63313826
  0.44000000   0.63313945
  0.44000000  -0.63313827
  0.44000000   0.63313945
  0.44000000  -0.63313827
  0.44000000   0.63313945
  0.44000000  -0.63313827
  0.44000000   0.63313945
  0.44000000  -0.63313827
  0.44000000   0.63313944
  0.44000000  -0.63313827
  0.44000000   0.63313944
  0.44000000  -0.63313827
  0.44000000   0.63313944
  0.44000000  -0.63313827
  0.44000000   0.63313944
  0.44000000  -0.63313827
  0.44000000   0.63313944
  0.44000000  -0.63313828
  0.44000000   0.63313944
  0.44000000  -0.63313828
  0.44000000   0.63313944
  0.44000000  -0.63313828
  0.44000000   0.63313944
  0.44000000  -0.63313828
  0.44000000   0.63313943
  0.44000000  -0.63313828
  0.44000000   0.63313943
  0.44000000  -0.63313828
  0.44000000   0.63313943
  0.44000000  -0.63313828
  0.44000000   0.63313943
  0.44000000  -0.63313828
  0.44000000   0.63313943
  0.44000000  -0.63313828
  0.44000000   0.63313943
  0.44000000  -0.63313829
  0.44000000   0.63313943
  0.44080000  -0.63292071
  0.44080000   0.63292189
  0.44080000  -0.63292071
  0.44080000   0.63292189
  0.44080000  -0.63292071
  0.44080000   0.63292189
  0.44080000  -0.63292071
  0.44080000   0.63292189
  0.44080000  -0.63292072
  0.44080000   0.63292189
  0.44080000  -0.63292072
  0.44080000   0.63292189
  0.44080000  -0.63292072
  0.44080000   0.63292189
  0.44080000  -0.63292072
  0.44080000   0.63292189
  0.44080000  -0.63292072
  0.44080000   0.63292188
  0.44080000  -0.63292072
  0.44080000   0.63292188
  0.44080000  -0.63292072
  0.44080000   0.63292188
  0.44080000  -0.63292072
  0.44080000   0.63292188
  0.44080000  -0.63292073
  0.44080000   0.63292188
  0.44080000  -0.63292073
  0.44080000   0.63292188
  0.44080000  -0.63292073
  0.44080000   0.63292188
  0.44080000  -0.63292073
  0.44080000   0.63292188
  0.44080000  -0.63292073
  0.44080000   0.63292187
  0.44080000  -0.63292073
  0.44080000   0.63292187
  0.44080000  -0.63292073
  0.44080000   0.63292187
  0.44080000  -0.63292073
  0.44080000   0.63292187
  0.44160000  -0.63270286
  0.44160000   0.63270404
  0.44160000  -0.63270287
  0.44160000   0.63270404
  0.44160000  -0.63270287
  0.44160000   0.63270404
  0.44160000  -0.63270287
  0.44160000   0.63270404
  0.44160000  -0.63270287
  0.44160000   0.63270404
  0.44160000  -0.63270287
  0.44160000   0.63270404
  0.44160000  -0.63270287
  0.44160000   0.63270403
  0.44160000  -0.63270287
  0.44160000   0.63270403
  0.44160000  -0.63270287
  0.44160000   0.63270403
  0.44160000  -0.63270288
  0.44160000   0.63270403
  0.44160000  -0.63270288
  0.44160000   0.63270403
  0.44160000  -0.63270288
  0.44160000   0.63270403
  0.44160000  -0.63270288
  0.44160000   0.63270403
  0.44160000  -0.63270288
  0.44160000   0.63270403
  0.44160000  -0.63270288
  0.44160000   0.63270403
  0.44160000  -0.63270288
  0.44160000   0.63270402
  0.44160000  -0.63270288
  0.44160000   0.63270402
  0.44160000  -0.63270288
  0.44160000   0.63270402
  0.44160000  -0.63270289
  0.44160000   0.63270402
  0.44160000  -0.63270289
  0.44160000   0.63270402
  0.44240000  -0.63248472
  0.44240000   0.63248589
  0.44240000  -0.63248472
  0.44240000   0.63248589
  0.44240000  -0.63248472
  0.44240000   0.63248589
  0.44240000  -0.63248473
  0.44240000   0.63248589
  0.44240000  -0.63248473
  0.44240000   0.63248589
  0.44240000  -0.63248473
  0.44240000   0.63248589
  0.44240000  -0.63248473
  0.44240000   0.63248589
  0.44240000  -0.63248473
  0.44240000   0.63248589
  0.44240000  -0.63248473
  0.44240000   0.63248589
  0.44240000  -0.63248473
  0.44240000   0.63248588
  0.44240000  -0.63248473
  0.44240000   0.63248588
  0.44240000  -0.63248473
  0.44240000   0.63248588
  0.44240000  -0.63248474
  0.44240000   0.63248588
  0.44240000  -0.63248474
  0.44240000   0.63248588
  0.44240000  -0.63248474
  0.44240000   0.63248588
  0.44240000  -0.63248474
  0.44240000   0.63248588
  0.44240000  -0.63248474
  0.44240000   0.63248588
  0.44240000  -0.63248474
  0.44240000   0.63248587
  0.44240000  -0.63248474
  0.44240000   0.63248587
  0.44240000  -0.63248474
  0.44240000   0.63248587
  0.44320000  -0.63226628
  0.44320000   0.63226745
  0.44320000  -0.63226628
  0.44320000   0.63226745
  0.44320000  -0.63226629
  0.44320000   0.63226745
  0.44320000  -0.63226629
  0.44320000   0.63226745
  0.44320000  -0.63226629
  0.44320000   0.63226745
  0.44320000  -0.63226629
  0.44320000   0.63226745
  0.44320000  -0.63226629
  0.44320000   0.63226744
  0.44320000  -0.63226629
  0.44320000   0.63226744
  0.44320000  -0.63226629
  0.44320000   0.63226744
  0.44320000  -0.63226629
  0.44320000   0.63226744
  0.44320000  -0.63226629
  0.44320000   0.63226744
  0.44320000  -0.63226630
  0.44320000   0.63226744
  0.44320000  -0.63226630
  0.44320000   0.63226744
  0.44320000  -0.63226630
  0.44320000   0.63226744
  0.44320000  -0.63226630
  0.44320000   0.63226743
  0.44320000  -0.63226630
  0.44320000   0.63226743
  0.44320000  -0.63226630
  0.44320000   0.63226743
  0.44320000  -0.63226630
  0.44320000   0.63226743
  0.44320000  -0.63226630
  0.44320000   0.63226743
  0.44320000  -0.63226631
  0.44320000   0.63226743
  0.44400000  -0.63204755
  0.44400000   0.63204871
  0.44400000  -0.63204755
  0.44400000   0.63204871
  0.44400000  -0.63204755
  0.44400000   0.63204871
  0.44400000  -0.63204755
  0.44400000   0.63204871
  0.44400000  -0.63204755
  0.44400000   0.63204871
  0.44400000  -0.63204755
  0.44400000   0.63204870
  0.44400000  -0.63204755
  0.44400000   0.63204870
  0.44400000  -0.63204756
  0.44400000   0.63204870
  0.44400000  -0.63204756
  0.44400000   0.63204870
  0.44400000  -0.63204756
  0.44400000   0.63204870
  0.44400000  -0.63204756
  0.44400000   0.63204870
  0.44400000  -0.63204756
  0.44400000   0.63204870
  0.44400000  -0.63204756
  0.44400000   0.63204870
  0.44400000  -0.63204756
  0.44400000   0.63204870
  0.44400000  -0.63204756
  0.44400000   0.63204869
  0.44400000  -0.63204756
  0.44400000   0.63204869
  0.44400000  -0.63204757
  0.44400000   0.63204869
  0.44400000  -0.63204757
  0.44400000   0.63204869
  0.44400000  -0.63204757
  0.44400000   0.63204869
  0.44400000  -0.63204757
  0.44400000   0.63204869
  0.44480000  -0.63182851
  0.44480000   0.63182967
  0.44480000  -0.63182852
  0.44480000   0.63182967
  0.44480000  -0.63182852
  0.44480000   0.63182967
  0.44480000  -0.63182852
  0.44480000   0.63182967
  0.44480000  -0.63182852
  0.44480000   0.63182967
  0.44480000  -0.63182852
  0.44480000   0.63182967
  0.44480000  -0.63182852
  0.44480000   0.63182967
  0.44480000  -0.63182852
  0.44480000   0.63182966
  0.44480000  -0.63182852
  0.44480000   0.63182966
  0.44480000  -0.63182852
  0.44480000   0.63182966
  0.44480000  -0.63182853
  0.44480000   0.63182966
  0.44480000  -0.63182853
  0.44480000   0.63182966
  0.44480000  -0.63182853
  0.44480000   0.63182966
  0.44480000  -0.63182853
  0.44480000   0.63182966
  0.44480000  -0.63182853
  0.44480000   0.63182966
  0.44480000  -0.63182853
  0.44480000   0.63182966
  0.44480000  -0.63182853
  0.44480000   0.63182965
  0.44480000  -0.63182853
  0.44480000   0.63182965
  0.44480000  -0.63182853
  0.44480000   0.63182965
  0.44480000  -0.63182854
  0.44480000   0.63182965
  0.44560000  -0.63160918
  0.44560000   0.63161034
  0.44560000  -0.63160918
  0.44560000   0.63161034
  0.44560000  -0.63160918
  0.44560000   0.63161033
  0.44560000  -0.63160919
  0.44560000   0.63161033
  0.44560000  -0.63160919
  0.44560000   0.63161033
  0.44560000  -0.63160919
  0.44560000   0.63161033
  0.44560000  -0.63160919
  0.44560000   0.63161033
  0.44560000  -0.63160919
  0.44560000   0.63161033
  0.44560000  -0.63160919
  0.44560000   0.63161033
  0.44560000  -0.63160919
  0.44560000   0.63161033
  0.44560000  -0.63160919
  0.44560000   0.63161032
  0.44560000  -0.63160920
  0.44560000   0.63161032
  0.44560000  -0.63160920
  0.44560000   0.63161032
  0.44560000  -0.63160920
  0.44560000   0.63161032
  0.44560000  -0.63160920
  0.44560000   0.63161032
  0.44560000  -0.63160920
  0.44560000   0.63161032
  0.44560000  -0.63160920
  0.44560000   0.63161032
  0.44560000  -0.63160920
  0.44560000   0.63161032
  0.44560000  -0.63160920
  0.44560000   0.63161032
  0.44560000  -0.63160920
  0.44560000   0.63161031
  0.44640000  -0.63138955
  0.44640000   0.63139070
  0.44640000  -0.63138955
  0.44640000   0.63139070
  0.44640000  -0.63138955
  0.44640000   0.63139070
  0.44640000  -0.63138956
  0.44640000   0.63139070
  0.44640000  -0.63138956
  0.44640000   0.63139070
  0.44640000  -0.63138956
  0.44640000   0.63139070
  0.44640000  -0.63138956
  0.44640000   0.63139069
  0.44640000  -0.63138956
  0.44640000   0.63139069
  0.44640000  -0.63138956
  0.44640000   0.63139069
  0.44640000  -0.63138956
  0.44640000   0.63139069
  0.44640000  -0.63138956
  0.44640000   0.63139069
  0.44640000  -0.63138956
  0.44640000   0.63139069
  0.44640000  -0.63138957
  0.44640000   0.63139069
  0.44640000  -0.63138957
  0.44640000   0.63139069
  0.44640000  -0.63138957
  0.44640000   0.63139069
  0.44640000  -0.63138957
  0.44640000   0.63139068
  0.44640000  -0.63138957
  0.44640000   0.63139068
  0.44640000  -0.63138957
  0.44640000   0.63139068
  0.44640000  -0.63138957
  0.44640000   0.63139068
  0.44640000  -0.63138957
  0.44640000   0.63139068
  0.44720000  -0.63116962
  0.44720000   0.63117077
  0.44720000  -0.63116962
  0.44720000   0.63117077
  0.44720000  -0.63116962
  0.44720000   0.63117076
  0.44720000  -0.63116963
  0.44720000   0.63117076
  0.44720000  -0.63116963
  0.44720000   0.63117076
  0.44720000  -0.63116963
  0.44720000   0.63117076
  0.44720000  -0.63116963
  0.44720000   0.63117076
  0.44720000  -0.63116963
  0.44720000   0.63117076
  0.44720000  -0.63116963
  0.44720000   0.63117076
  0.44720000  -0.63116963
  0.44720000   0.63117076
  0.44720000  -0.63116963
  0.44720000   0.63117076
  0.44720000  -0.63116963
  0.44720000   0.63117075
  0.44720000  -0.63116964
  0.44720000   0.63117075
  0.44720000  -0.63116964
  0.44720000   0.63117075
  0.44720000  -0.63116964
  0.44720000   0.63117075
  0.44720000  -0.63116964
  0.44720000   0.63117075
  0.44720000  -0.63116964
  0.44720000   0.63117075
  0.44720000  -0.63116964
  0.44720000   0.63117075
  0.44720000  -0.63116964
  0.44720000   0.63117075
  0.44720000  -0.63116964
  0.44720000   0.63117075
  0.44800000  -0.63094939
  0.44800000   0.63095053
  0.44800000  -0.63094939
  0.44800000   0.63095053
  0.44800000  -0.63094939
  0.44800000   0.63095053
  0.44800000  -0.63094940
  0.44800000   0.63095053
  0.44800000  -0.63094940
  0.44800000   0.63095053
  0.44800000  -0.63094940
  0.44800000   0.63095053
  0.44800000  -0.63094940
  0.44800000   0.63095052
  0.44800000  -0.63094940
  0.44800000   0.63095052
  0.44800000  -0.63094940
  0.44800000   0.63095052
  0.44800000  -0.63094940
  0.44800000   0.63095052
  0.44800000  -0.63094940
  0.44800000   0.63095052
  0.44800000  -0.63094940
  0.44800000   0.63095052
  0.44800000  -0.63094941
  0.44800000   0.63095052
  0.44800000  -0.63094941
  0.44800000   0.63095052
  0.44800000  -0.63094941
  0.44800000   0.63095052
  0.44800000  -0.63094941
  0.44800000   0.63095051
  0.44800000  -0.63094941
  0.44800000   0.63095051
  0.44800000  -0.63094941
  0.44800000   0.63095051
  0.44800000  -0.63094941
  0.44800000   0.63095051
  0.44800000  -0.63094941
  0.44800000   0.63095051
  0.44880000  -0.63072886
  0.44880000   0.63073000
  0.44880000  -0.63072886
  0.44880000   0.63073000
  0.44880000  -0.63072886
  0.44880000   0.63072999
  0.44880000  -0.63072886
  0.44880000   0.63072999
  0.44880000  -0.63072887
  0.44880000   0.63072999
  0.44880000  -0.63072887
  0.44880000   0.63072999
  0.44880000  -0.63072887
  0.44880000   0.63072999
  0.44880000  -0.63072887
  0.44880000   0.63072999
  0.44880000  -0.63072887
  0.44880000   0.63072999
  0.44880000  -0.63072887
  0.44880000   0.63072999
  0.44880000  -0.63072887
  0.44880000   0.63072998
  0.44880000  -0.63072887
  0.44880000   0.63072998
  0.44880000  -0.63072887
  0.44880000   0.63072998
  0.44880000  -0.63072888
  0.44880000   0.63072998
  0.44880000  -0.63072888
  0.44880000   0.63072998
  0.44880000  -0.63072888
  0.44880000   0.63072998
  0.44880000  -0.63072888
  0.44880000   0.63072998
  0.44880000  -0.63072888
  0.44880000   0.63072998
  0.44880000  -0.63072888
  0.44880000   0.63072998
  0.44880000  -0.63072888
  0.44880000   0.63072997
  0.44960000  -0.63050803
  0.44960000   0.63050916
  0.44960000  -0.63050803
  0.44960000   0.63050916
  0.44960000  -0.63050803
  0.44960000   0.63050916
  0.44960000  -0.63050803
  0.44960000   0.63050916
  0.44960000  -0.63050803
  0.44960000   0.63050915
  0.44960000  -0.63050803
  0.44960000   0.63050915
  0.44960000  -0.63050804
  0.44960000   0.63050915
  0.44960000  -0.63050804
  0.44960000   0.63050915
  0.44960000  -0.63050804
  0.44960000   0.63050915
  0.44960000  -0.63050804
  0.44960000   0.63050915
  0.44960000  -0.63050804
  0.44960000   0.63050915
  0.44960000  -0.63050804
  0.44960000   0.63050915
  0.44960000  -0.63050804
  0.44960000   0.63050915
  0.44960000  -0.63050804
  0.44960000   0.63050914
  0.44960000  -0.63050804
  0.44960000   0.63050914
  0.44960000  -0.63050805
  0.44960000   0.63050914
  0.44960000  -0.63050805
  0.44960000   0.63050914
  0.44960000  -0.63050805
  0.44960000   0.63050914
  0.44960000  -0.63050805
  0.44960000   0.63050914
  0.44960000  -0.63050805
  0.44960000   0.63050914
  0.45040000  -0.63028689
  0.45040000   0.63028802
  0.45040000  -0.63028689
  0.45040000   0.63028802
  0.45040000  -0.63028690
  0.45040000   0.63028802
  0.45040000  -0.63028690
  0.45040000   0.63028802
  0.45040000  -0.63028690
  0.45040000   0.63028802
  0.45040000  -0.63028690
  0.45040000   0.63028801
  0.45040000  -0.63028690
  0.45040000   0.63028801
  0.45040000  -0.63028690
  0.45040000   0.63028801
  0.45040000  -0.63028690
  0.45040000   0.63028801
  0.45040000  -0.63028690
  0.45040000   0.63028801
  0.45040000  -0.63028691
  0.45040000   0.63028801
  0.45040000  -0.63028691
  0.45040000   0.63028801
  0.45040000  -0.63028691
  0.45040000   0.63028801
  0.45040000  -0.63028691
  0.45040000   0.63028801
  0.45040000  -0.63028691
  0.45040000   0.63028800
  0.45040000  -0.63028691
  0.45040000   0.63028800
  0.45040000  -0.63028691
  0.45040000   0.63028800
  0.45040000  -0.63028691
  0.45040000   0.63028800
  0.45040000  -0.63028691
  0.45040000   0.63028800
  0.45040000  -0.63028692
  0.45040000   0.63028800
  0.45120000  -0.63006546
  0.45120000   0.63006658
  0.45120000  -0.63006546
  0.45120000   0.63006658
  0.45120000  -0.63006546
  0.45120000   0.63006658
  0.45120000  -0.63006546
  0.45120000   0.63006657
  0.45120000  -0.63006546
  0.45120000   0.63006657
  0.45120000  -0.63006546
  0.45120000   0.63006657
  0.45120000  -0.63006546
  0.45120000   0.63006657
  0.45120000  -0.63006546
  0.45120000   0.63006657
  0.45120000  -0.63006547
  0.45120000   0.63006657
  0.45120000  -0.63006547
  0.45120000   0.63006657
  0.45120000  -0.63006547
  0.45120000   0.63006657
  0.45120000  -0.63006547
  0.45120000   0.63006657
  0.45120000  -0.63006547
  0.45120000   0.63006656
  0.45120000  -0.63006547
  0.45120000   0.63006656
  0.45120000  -0.63006547
  0.45120000   0.63006656
  0.45120000  -0.63006547
  0.45120000   0.63006656
  0.45120000  -0.63006547
  0.45120000   0.63006656
  0.45120000  -0.63006548
  0.45120000   0.63006656
  0.45120000  -0.63006548
  0.45120000   0.63006656
  0.45120000  -0.63006548
  0.45120000   0.63006656
  0.45200000  -0.62984372
  0.45200000   0.62984483
  0.45200000  -0.62984372
  0.45200000   0.62984483
  0.45200000  -0.62984372
  0.45200000   0.62984483
  0.45200000  -0.62984372
  0.45200000   0.62984483
  0.45200000  -0.62984372
  0.45200000   0.62984483
  0.45200000  -0.62984372
  0.45200000   0.62984483
  0.45200000  -0.62984372
  0.45200000   0.62984483
  0.45200000  -0.62984372
  0.45200000   0.62984482
  0.45200000  -0.62984372
  0.45200000   0.62984482
  0.45200000  -0.62984373
  0.45200000   0.62984482
  0.45200000  -0.62984373
  0.45200000   0.62984482
  0.45200000  -0.62984373
  0.45200000   0.62984482
  0.45200000  -0.62984373
  0.45200000   0.62984482
  0.45200000  -0.62984373
  0.45200000   0.62984482
  0.45200000  -0.62984373
  0.45200000   0.62984482
  0.45200000  -0.62984373
  0.45200000   0.62984482
  0.45200000  -0.62984373
  0.45200000   0.62984481
  0.45200000  -0.62984373
  0.45200000   0.62984481
  0.45200000  -0.62984374
  0.45200000   0.62984481
  0.45200000  -0.62984374
  0.45200000   0.62984481
  0.45280000  -0.62962167
  0.45280000   0.62962278
  0.45280000  -0.62962167
  0.45280000   0.62962278
  0.45280000  -0.62962167
  0.45280000   0.62962278
  0.45280000  -0.62962167
  0.45280000   0.62962278
  0.45280000  -0.62962167
  0.45280000   0.62962278
  0.45280000  -0.62962168
  0.45280000   0.62962278
  0.45280000  -0.62962168
  0.45280000   0.62962278
  0.45280000  -0.62962168
  0.45280000   0.62962278
  0.45280000  -0.62962168
  0.45280000   0.62962277
  0.45280000  -0.62962168
  0.45280000   0.62962277
  0.45280000  -0.62962168
  0.45280000   0.62962277
  0.45280000  -0.62962168
  0.45280000   0.62962277
  0.45280000  -0.62962168
  0.45280000   0.62962277
  0.45280000  -0.62962168
  0.45280000   0.62962277
  0.45280000  -0.62962169
  0.45280000   0.62962277
  0.45280000  -0.62962169
  0.45280000   0.62962277
  0.45280000  -0.62962169
  0.45280000   0.62962277
  0.45280000  -0.62962169
  0.45280000   0.62962276
  0.45280000  -0.62962169
  0.45280000   0.62962276
  0.45280000  -0.62962169
  0.45280000   0.62962276
  0.45360000  -0.62939932
  0.45360000   0.62940043
  0.45360000  -0.62939932
  0.45360000   0.62940043
  0.45360000  -0.62939932
  0.45360000   0.62940043
  0.45360000  -0.62939932
  0.45360000   0.62940043
  0.45360000  -0.62939933
  0.45360000   0.62940042
  0.45360000  -0.62939933
  0.45360000   0.62940042
  0.45360000  -0.62939933
  0.45360000   0.62940042
  0.45360000  -0.62939933
  0.45360000   0.62940042
  0.45360000  -0.62939933
  0.45360000   0.62940042
  0.45360000  -0.62939933
  0.45360000   0.62940042
  0.45360000  -0.62939933
  0.45360000   0.62940042
  0.45360000  -0.62939933
  0.45360000   0.62940042
  0.45360000  -0.62939933
  0.45360000   0.62940042
  0.45360000  -0.62939934
  0.45360000   0.62940041
  0.45360000  -0.62939934
  0.45360000   0.62940041
  0.45360000  -0.62939934
  0.45360000   0.62940041
  0.45360000  -0.62939934
  0.45360000   0.62940041
  0.45360000  -0.62939934
  0.45360000   0.62940041
  0.45360000  -0.62939934
  0.45360000   0.62940041
  0.45360000  -0.62939934
  0.45360000   0.62940041
  0.45440000  -0.62917667
  0.45440000   0.62917777
  0.45440000  -0.62917667
  0.45440000   0.62917777
  0.45440000  -0.62917667
  0.45440000   0.62917777
  0.45440000  -0.62917667
  0.45440000   0.62917777
  0.45440000  -0.62917667
  0.45440000   0.62917776
  0.45440000  -0.62917667
  0.45440000   0.62917776
  0.45440000  -0.62917667
  0.45440000   0.62917776
  0.45440000  -0.62917667
  0.45440000   0.62917776
  0.45440000  -0.62917667
  0.45440000   0.62917776
  0.45440000  -0.62917668
  0.45440000   0.62917776
  0.45440000  -0.62917668
  0.45440000   0.62917776
  0.45440000  -0.62917668
  0.45440000   0.62917776
  0.45440000  -0.62917668
  0.45440000   0.62917776
  0.45440000  -0.62917668
  0.45440000   0.62917775
  0.45440000  -0.62917668
  0.45440000   0.62917775
  0.45440000  -0.62917668
  0.45440000   0.62917775
  0.45440000  -0.62917668
  0.45440000   0.62917775
  0.45440000  -0.62917668
  0.45440000   0.62917775
  0.45440000  -0.62917669
  0.45440000   0.62917775
  0.45440000  -0.62917669
  0.45440000   0.62917775
  0.45520000  -0.62895370
  0.45520000   0.62895480
  0.45520000  -0.62895370
  0.45520000   0.62895480
  0.45520000  -0.62895371
  0.45520000   0.62895480
  0.45520000  -0.62895371
  0.45520000   0.62895480
  0.45520000  -0.62895371
  0.45520000   0.62895480
  0.45520000  -0.62895371
  0.45520000   0.62895480
  0.45520000  -0.62895371
  0.45520000   0.62895480
  0.45520000  -0.62895371
  0.45520000   0.62895480
  0.45520000  -0.62895371
  0.45520000   0.62895479
  0.45520000  -0.62895371
  0.45520000   0.62895479
  0.45520000  -0.62895371
  0.45520000   0.62895479
  0.45520000  -0.62895372
  0.45520000   0.62895479
  0.45520000  -0.62895372
  0.45520000   0.62895479
  0.45520000  -0.62895372
  0.45520000   0.62895479
  0.45520000  -0.62895372
  0.45520000   0.62895479
  0.45520000  -0.62895372
  0.45520000   0.62895479
  0.45520000  -0.62895372
  0.45520000   0.62895479
  0.45520000  -0.62895372
  0.45520000   0.62895478
  0.45520000  -0.62895372
  0.45520000   0.62895478
  0.45520000  -0.62895372
  0.45520000   0.62895478
  0.45600000  -0.62873044
  0.45600000   0.62873153
  0.45600000  -0.62873044
  0.45600000   0.62873153
  0.45600000  -0.62873044
  0.45600000   0.62873153
  0.45600000  -0.62873044
  0.45600000   0.62873153
  0.45600000  -0.62873044
  0.45600000   0.62873153
  0.45600000  -0.62873044
  0.45600000   0.62873152
  0.45600000  -0.62873044
  0.45600000   0.62873152
  0.45600000  -0.62873044
  0.45600000   0.62873152
  0.45600000  -0.62873044
  0.45600000   0.62873152
  0.45600000  -0.62873045
  0.45600000   0.62873152
  0.45600000  -0.62873045
  0.45600000   0.62873152
  0.45600000  -0.62873045
  0.45600000   0.62873152
  0.45600000  -0.62873045
  0.45600000   0.62873152
  0.45600000  -0.62873045
  0.45600000   0.62873152
  0.45600000  -0.62873045
  0.45600000   0.62873151
  0.45600000  -0.62873045
  0.45600000   0.62873151
  0.45600000  -0.62873045
  0.45600000   0.62873151
  0.45600000  -0.62873045
  0.45600000   0.62873151
  0.45600000  -0.62873046
  0.45600000   0.62873151
  0.45600000  -0.62873046
  0.45600000   0.62873151
  0.45680000  -0.62850686
  0.45680000   0.62850795
  0.45680000  -0.62850686
  0.45680000   0.62850795
  0.45680000  -0.62850686
  0.45680000   0.62850795
  0.45680000  -0.62850686
  0.45680000   0.62850795
  0.45680000  -0.62850686
  0.45680000   0.62850795
  0.45680000  -0.62850687
  0.45680000   0.62850794
  0.45680000  -0.62850687
  0.45680000   0.62850794
  0.45680000  -0.62850687
  0.45680000   0.62850794
  0.45680000  -0.62850687
  0.45680000   0.62850794
  0.45680000  -0.62850687
  0.45680000   0.62850794
  0.45680000  -0.62850687
  0.45680000   0.62850794
  0.45680000  -0.62850687
  0.45680000   0.62850794
  0.45680000  -0.62850687
  0.45680000   0.62850794
  0.45680000  -0.62850687
  0.45680000   0.62850794
  0.45680000  -0.62850688
  0.45680000   0.62850793
  0.45680000  -0.62850688
  0.45680000   0.62850793
  0.45680000  -0.62850688
  0.45680000   0.62850793
  0.45680000  -0.62850688
  0.45680000   0.62850793
  0.45680000  -0.62850688
  0.45680000   0.62850793
  0.45680000  -0.62850688
  0.45680000   0.62850793
  0.45760000  -0.62828298
  0.45760000   0.62828406
  0.45760000  -0.62828298
  0.45760000   0.62828406
  0.45760000  -0.62828298
  0.45760000   0.62828406
  0.45760000  -0.62828298
  0.45760000   0.62828406
  0.45760000  -0.62828298
  0.45760000   0.62828406
  0.45760000  -0.62828298
  0.45760000   0.62828406
  0.45760000  -0.62828298
  0.45760000   0.62828405
  0.45760000  -0.62828298
  0.45760000   0.62828405
  0.45760000  -0.62828298
  0.45760000   0.62828405
  0.45760000  -0.62828299
  0.45760000   0.62828405
  0.45760000  -0.62828299
  0.45760000   0.62828405
  0.45760000  -0.62828299
  0.45760000   0.62828405
  0.45760000  -0.62828299
  0.45760000   0.62828405
  0.45760000  -0.62828299
  0.45760000   0.62828405
  0.45760000  -0.62828299
  0.45760000   0.62828405
  0.45760000  -0.62828299
  0.45760000   0.62828405
  0.45760000  -0.62828299
  0.45760000   0.62828404
  0.45760000  -0.62828299
  0.45760000   0.62828404
  0.45760000  -0.62828300
  0.45760000   0.62828404
  0.45760000  -0.62828300
  0.45760000   0.62828404
  0.45840000  -0.62805878
  0.45840000   0.62805986
  0.45840000  -0.62805878
  0.45840000   0.62805986
  0.45840000  -0.62805879
  0.45840000   0.62805986
  0.45840000  -0.62805879
  0.45840000   0.62805986
  0.45840000  -0.62805879
  0.45840000   0.62805986
  0.45840000  -0.62805879
  0.45840000   0.62805986
  0.45840000  -0.62805879
  0.45840000   0.62805986
  0.45840000  -0.62805879
  0.45840000   0.62805986
  0.45840000  -0.62805879
  0.45840000   0.62805986
  0.45840000  -0.62805879
  0.45840000   0.62805985
  0.45840000  -0.62805879
  0.45840000   0.62805985
  0.45840000  -0.62805879
  0.45840000   0.62805985
  0.45840000  -0.62805880
  0.45840000   0.62805985
  0.45840000  -0.62805880
  0.45840000   0.62805985
  0.45840000  -0.62805880
  0.45840000   0.62805985
  0.45840000  -0.62805880
  0.45840000   0.62805985
  0.45840000  -0.62805880
  0.45840000   0.62805985
  0.45840000  -0.62805880
  0.45840000   0.62805985
  0.45840000  -0.62805880
  0.45840000   0.62805984
  0.45840000  -0.62805880
  0.45840000   0.62805984
  0.45920000  -0.62783428
  0.45920000   0.62783536
  0.45920000  -0.62783428
  0.45920000   0.62783536
  0.45920000  -0.62783428
  0.45920000   0.62783536
  0.45920000  -0.62783428
  0.45920000   0.62783535
  0.45920000  -0.62783428
  0.45920000   0.62783535
  0.45920000  -0.62783429
  0.45920000   0.62783535
  0.45920000  -0.62783429
  0.45920000   0.62783535
  0.45920000  -0.62783429
  0.45920000   0.62783535
  0.45920000  -0.62783429
  0.45920000   0.62783535
  0.45920000  -0.62783429
  0.45920000   0.62783535
  0.45920000  -0.62783429
  0.45920000   0.62783535
  0.45920000  -0.62783429
  0.45920000   0.62783535
  0.45920000  -0.62783429
  0.45920000   0.62783534
  0.45920000  -0.62783429
  0.45920000   0.62783534
  0.45920000  -0.62783430
  0.45920000   0.62783534
  0.45920000  -0.62783430
  0.45920000   0.62783534
  0.45920000  -0.62783430
  0.45920000   0.62783534
  0.45920000  -0.62783430
  0.45920000   0.62783534
  0.45920000  -0.62783430
  0.45920000   0.62783534
  0.45920000  -0.62783430
  0.45920000   0.62783534
  0.46000000  -0.62760947
  0.46000000   0.62761054
  0.46000000  -0.62760947
  0.46000000   0.62761054
  0.46000000  -0.62760947
  0.46000000   0.62761054
  0.46000000  -0.62760947
  0.46000000   0.62761054
  0.46000000  -0.62760947
  0.46000000   0.62761054
  0.46000000  -0.62760947
  0.46000000   0.62761053
  0.46000000  -0.62760947
  0.46000000   0.62761053
  0.46000000  -0.62760948
  0.46000000   0.62761053
  0.46000000  -0.62760948
  0.46000000   0.62761053
  0.46000000  -0.62760948
  0.46000000   0.62761053
  0.46000000  -0.62760948
  0.46000000   0.62761053
  0.46000000  -0.62760948
  0.46000000   0.62761053
  0.46000000  -0.62760948
  0.46000000   0.62761053
  0.46000000  -0.62760948
  0.46000000   0.62761053
  0.46000000  -0.62760948
  0.46000000   0.62761053
  0.46000000  -0.62760948
  0.46000000   0.62761052
  0.46000000  -0.62760949
  0.46000000   0.62761052
  0.46000000  -0.62760949
  0.46000000   0.62761052
  0.46000000  -0.62760949
  0.46000000   0.62761052
  0.46000000  -0.62760949
  0.46000000   0.62761052
  0.46080000  -0.62738434
  0.46080000   0.62738541
  0.46080000  -0.62738435
  0.46080000   0.62738541
  0.46080000  -0.62738435
  0.46080000   0.62738541
  0.46080000  -0.62738435
  0.46080000   0.62738541
  0.46080000  -0.62738435
  0.46080000   0.62738541
  0.46080000  -0.62738435
  0.46080000   0.62738541
  0.46080000  -0.62738435
  0.46080000   0.62738541
  0.46080000  -0.62738435
  0.46080000   0.62738540
  0.46080000  -0.62738435
  0.46080000   0.62738540
  0.46080000  -0.62738435
  0.46080000   0.62738540
  0.46080000  -0.62738436
  0.46080000   0.62738540
  0.46080000  -0.62738436
  0.46080000   0.62738540
  0.46080000  -0.62738436
  0.46080000   0.62738540
  0.46080000  -0.62738436
  0.46080000   0.62738540
  0.46080000  -0.62738436
  0.46080000   0.62738540
  0.46080000  -0.62738436
  0.46080000   0.62738540
  0.46080000  -0.62738436
  0.46080000   0.62738540
  0.46080000  -0.62738436
  0.46080000   0.62738539
  0.46080000  -0.62738436
  0.46080000   0.62738539
  0.46080000  -0.62738436
  0.46080000   0.62738539
  0.46160000  -0.62715891
  0.46160000   0.62715997
  0.46160000  -0.62715891
  0.46160000   0.62715997
  0.46160000  -0.62715891
  0.46160000   0.62715997
  0.46160000  -0.62715891
  0.46160000   0.62715997
  0.46160000  -0.62715891
  0.46160000   0.62715997
  0.46160000  -0.62715891
  0.46160000   0.62715997
  0.46160000  -0.62715892
  0.46160000   0.62715997
  0.46160000  -0.62715892
  0.46160000   0.62715997
  0.46160000  -0.62715892
  0.46160000   0.62715996
  0.46160000  -0.62715892
  0.46160000   0.62715996
  0.46160000  -0.62715892
  0.46160000   0.62715996
  0.46160000  -0.62715892
  0.46160000   0.62715996
  0.46160000  -0.62715892
  0.46160000   0.62715996
  0.46160000  -0.62715892
  0.46160000   0.62715996
  0.46160000  -0.62715892
  0.46160000   0.62715996
  0.46160000  -0.62715893
  0.46160000   0.62715996
  0.46160000  -0.62715893
  0.46160000   0.62715996
  0.46160000  -0.62715893
  0.46160000   0.62715995
  0.46160000  -0.62715893
  0.46160000   0.62715995
  0.46160000  -0.62715893
  0.46160000   0.62715995
  0.46240000  -0.62693316
  0.46240000   0.62693422
  0.46240000  -0.62693316
  0.46240000   0.62693422
  0.46240000  -0.62693316
  0.46240000   0.62693422
  0.46240000  -0.62693317
  0.46240000   0.62693422
  0.46240000  -0.62693317
  0.46240000   0.62693422
  0.46240000  -0.62693317
  0.46240000   0.62693422
  0.46240000  -0.62693317
  0.46240000   0.62693421
  0.46240000  -0.62693317
  0.46240000   0.62693421
  0.46240000  -0.62693317
  0.46240000   0.62693421
  0.46240000  -0.62693317
  0.46240000   0.62693421
  0.46240000  -0.62693317
  0.46240000   0.62693421
  0.46240000  -0.62693317
  0.46240000   0.62693421
  0.46240000  -0.62693317
  0.46240000   0.62693421
  0.46240000  -0.62693318
  0.46240000   0.62693421
  0.46240000  -0.62693318
  0.46240000   0.62693421
  0.46240000  -0.62693318
  0.46240000   0.62693421
  0.46240000  -0.62693318
  0.46240000   0.62693420
  0.46240000  -0.62693318
  0.46240000   0.62693420
  0.46240000  -0.62693318
  0.46240000   0.62693420
  0.46240000  -0.62693318
  0.46240000   0.62693420
  0.46320000  -0.62670710
  0.46320000   0.62670816
  0.46320000  -0.62670710
  0.46320000   0.62670816
  0.46320000  -0.62670710
  0.46320000   0.62670815
  0.46320000  -0.62670710
  0.46320000   0.62670815
  0.46320000  -0.62670711
  0.46320000   0.62670815
  0.46320000  -0.62670711
  0.46320000   0.62670815
  0.46320000  -0.62670711
  0.46320000   0.62670815
  0.46320000  -0.62670711
  0.46320000   0.62670815
  0.46320000  -0.62670711
  0.46320000   0.62670815
  0.46320000  -0.62670711
  0.46320000   0.62670815
  0.46320000  -0.62670711
  0.46320000   0.62670815
  0.46320000  -0.62670711
  0.46320000   0.62670814
  0.46320000  -0.62670711
  0.46320000   0.62670814
  0.46320000  -0.62670712
  0.46320000   0.62670814
  0.46320000  -0.62670712
  0.46320000   0.62670814
  0.46320000  -0.62670712
  0.46320000   0.62670814
  0.46320000  -0.62670712
  0.46320000   0.62670814
  0.46320000  -0.62670712
  0.46320000   0.62670814
  0.46320000  -0.62670712
  0.46320000   0.62670814
  0.46320000  -0.62670712
  0.46320000   0.62670814
  0.46400000  -0.62648073
  0.46400000   0.62648178
  0.46400000  -0.62648073
  0.46400000   0.62648178
  0.46400000  -0.62648073
  0.46400000   0.62648178
  0.46400000  -0.62648073
  0.46400000   0.62648177
  0.46400000  -0.62648073
  0.46400000   0.62648177
  0.46400000  -0.62648073
  0.46400000   0.62648177
  0.46400000  -0.62648073
  0.46400000   0.62648177
  0.46400000  -0.62648074
  0.46400000   0.62648177
  0.46400000  -0.62648074
  0.46400000   0.62648177
  0.46400000  -0.62648074
  0.46400000   0.62648177
  0.46400000  -0.62648074
  0.46400000   0.62648177
  0.46400000  -0.62648074
  0.46400000   0.62648177
  0.46400000  -0.62648074
  0.46400000   0.62648177
  0.46400000  -0.62648074
  0.46400000   0.62648176
  0.46400000  -0.62648074
  0.46400000   0.62648176
  0.46400000  -0.62648074
  0.46400000   0.62648176
  0.46400000  -0.62648074
  0.46400000   0.62648176
  0.46400000  -0.62648075
  0.46400000   0.62648176
  0.46400000  -0.62648075
  0.46400000   0.62648176
  0.46400000  -0.62648075
  0.46400000   0.62648176
  0.46480000  -0.62625404
  0.46480000   0.62625509
  0.46480000  -0.62625404
  0.46480000   0.62625508
  0.46480000  -0.62625404
  0.46480000   0.62625508
  0.46480000  -0.62625404
  0.46480000   0.62625508
  0.46480000  -0.62625404
  0.46480000   0.62625508
  0.46480000  -0.62625404
  0.46480000   0.62625508
  0.46480000  -0.62625405
  0.46480000   0.62625508
  0.46480000  -0.62625405
  0.46480000   0.62625508
  0.46480000  -0.62625405
  0.46480000   0.62625508
  0.46480000  -0.62625405
  0.46480000   0.62625508
  0.46480000  -0.62625405
  0.46480000   0.62625507
  0.46480000  -0.62625405
  0.46480000   0.62625507
  0.46480000  -0.62625405
  0.46480000   0.62625507
  0.46480000  -0.62625405
  0.46480000   0.62625507
  0.46480000  -0.62625405
  0.46480000   0.62625507
  0.46480000  -0.62625405
  0.46480000   0.62625507
  0.46480000  -0.62625406
  0.46480000   0.62625507
  0.46480000  -0.62625406
  0.46480000   0.62625507
  0.46480000  -0.62625406
  0.46480000   0.62625507
  0.46480000  -0.62625406
  0.46480000   0.62625507
  0.46560000  -0.62602704
  0.46560000   0.62602808
  0.46560000  -0.62602704
  0.46560000   0.62602808
  0.46560000  -0.62602704
  0.46560000   0.62602808
  0.46560000  -0.62602704
  0.46560000   0.62602807
  0.46560000  -0.62602704
  0.46560000   0.62602807
  0.46560000  -0.62602704
  0.46560000   0.62602807
  0.46560000  -0.62602704
  0.46560000   0.62602807
  0.46560000  -0.62602704
  0.46560000   0.62602807
  0.46560000  -0.62602704
  0.46560000   0.62602807
  0.46560000  -0.62602705
  0.46560000   0.62602807
  0.46560000  -0.62602705
  0.46560000   0.62602807
  0.46560000  -0.62602705
  0.46560000   0.62602807
  0.46560000  -0.62602705
  0.46560000   0.62602806
  0.46560000  -0.62602705
  0.46560000   0.62602806
  0.46560000  -0.62602705
  0.46560000   0.62602806
  0.46560000  -0.62602705
  0.46560000   0.62602806
  0.46560000  -0.62602705
  0.46560000   0.62602806
  0.46560000  -0.62602705
  0.46560000   0.62602806
  0.46560000  -0.62602705
  0.46560000   0.62602806
  0.46560000  -0.62602706
  0.46560000   0.62602806
  0.46640000  -0.62579972
  0.46640000   0.62580075
  0.46640000  -0.62579972
  0.46640000   0.62580075
  0.46640000  -0.62579972
  0.46640000   0.62580075
  0.46640000  -0.62579972
  0.46640000   0.62580075
  0.46640000  -0.62579972
  0.46640000   0.62580075
  0.46640000  -0.62579972
  0.46640000   0.62580075
  0.46640000  -0.62579972
  0.46640000   0.62580075
  0.46640000  -0.62579972
  0.46640000   0.62580075
  0.46640000  -0.62579972
  0.46640000   0.62580075
  0.46640000  -0.62579973
  0.46640000   0.62580074
  0.46640000  -0.62579973
  0.46640000   0.62580074
  0.46640000  -0.62579973
  0.46640000   0.62580074
  0.46640000  -0.62579973
  0.46640000   0.62580074
  0.46640000  -0.62579973
  0.46640000   0.62580074
  0.46640000  -0.62579973
  0.46640000   0.62580074
  0.46640000  -0.62579973
  0.46640000   0.62580074
  0.46640000  -0.62579973
  0.46640000   0.62580074
  0.46640000  -0.62579973
  0.46640000   0.62580074
  0.46640000  -0.62579974
  0.46640000   0.62580074
  0.46640000  -0.62579974
  0.46640000   0.62580073
  0.46720000  -0.62557208
  0.46720000   0.62557311
  0.46720000  -0.62557208
  0.46720000   0.62557311
  0.46720000  -0.62557208
  0.46720000   0.62557311
  0.46720000  -0.62557208
  0.46720000   0.62557311
  0.46720000  -0.62557208
  0.46720000   0.62557311
  0.46720000  -0.62557209
  0.46720000   0.62557311
  0.46720000  -0.62557209
  0.46720000   0.62557311
  0.46720000  -0.62557209
  0.46720000   0.62557311
  0.46720000  -0.62557209
  0.46720000   0.62557311
  0.46720000  -0.62557209
  0.46720000   0.62557310
  0.46720000  -0.62557209
  0.46720000   0.62557310
  0.46720000  -0.62557209
  0.46720000   0.62557310
  0.46720000  -0.62557209
  0.46720000   0.62557310
  0.46720000  -0.62557209
  0.46720000   0.62557310
  0.46720000  -0.62557210
  0.46720000   0.62557310
  0.46720000  -0.62557210
  0.46720000   0.62557310
  0.46720000  -0.62557210
  0.46720000   0.62557310
  0.46720000  -0.62557210
  0.46720000   0.62557310
  0.46720000  -0.62557210
  0.46720000   0.62557310
  0.46720000  -0.62557210
  0.46720000   0.62557309
  0.46800000  -0.62534413
  0.46800000   0.62534516
  0.46800000  -0.62534413
  0.46800000   0.62534516
  0.46800000  -0.62534413
  0.46800000   0.62534515
  0.46800000  -0.62534413
  0.46800000   0.62534515
  0.46800000  -0.62534413
  0.46800000   0.62534515
  0.46800000  -0.62534413
  0.46800000   0.62534515
  0.46800000  -0.62534413
  0.46800000   0.62534515
  0.46800000  -0.62534413
  0.46800000   0.62534515
  0.46800000  -0.62534414
  0.46800000   0.62534515
  0.46800000  -0.62534414
  0.46800000   0.62534515
  0.46800000  -0.62534414
  0.46800000   0.62534515
  0.46800000  -0.62534414
  0.46800000   0.62534515
  0.46800000  -0.62534414
  0.46800000   0.62534514
  0.46800000  -0.62534414
  0.46800000   0.62534514
  0.46800000  -0.62534414
  0.46800000   0.62534514
  0.46800000  -0.62534414
  0.46800000   0.62534514
  0.46800000  -0.62534414
  0.46800000   0.62534514
  0.46800000  -0.62534415
  0.46800000   0.62534514
  0.46800000  -0.62534415
  0.46800000   0.62534514
  0.46800000  -0.62534415
  0.46800000   0.62534514
  0.46880000  -0.62511586
  0.46880000   0.62511688
  0.46880000  -0.62511586
  0.46880000   0.62511688
  0.46880000  -0.62511586
  0.46880000   0.62511688
  0.46880000  -0.62511586
  0.46880000   0.62511688
  0.46880000  -0.62511586
  0.46880000   0.62511688
  0.46880000  -0.62511586
  0.46880000   0.62511688
  0.46880000  -0.62511586
  0.46880000   0.62511688
  0.46880000  -0.62511586
  0.46880000   0.62511687
  0.46880000  -0.62511587
  0.46880000   0.62511687
  0.46880000  -0.62511587
  0.46880000   0.62511687
  0.46880000  -0.62511587
  0.46880000   0.62511687
  0.46880000  -0.62511587
  0.46880000   0.62511687
  0.46880000  -0.62511587
  0.46880000   0.62511687
  0.46880000  -0.62511587
  0.46880000   0.62511687
  0.46880000  -0.62511587
  0.46880000   0.62511687
  0.46880000  -0.62511587
  0.46880000   0.62511687
  0.46880000  -0.62511587
  0.46880000   0.62511687
  0.46880000  -0.62511587
  0.46880000   0.62511686
  0.46880000  -0.62511588
  0.46880000   0.62511686
  0.46880000  -0.62511588
  0.46880000   0.62511686
  0.46960000  -0.62488727
  0.46960000   0.62488829
  0.46960000  -0.62488727
  0.46960000   0.62488829
  0.46960000  -0.62488727
  0.46960000   0.62488829
  0.46960000  -0.62488727
  0.46960000   0.62488828
  0.46960000  -0.62488727
  0.46960000   0.62488828
  0.46960000  -0.62488727
  0.46960000   0.62488828
  0.46960000  -0.62488727
  0.46960000   0.62488828
  0.46960000  -0.62488727
  0.46960000   0.62488828
  0.46960000  -0.62488728
  0.46960000   0.62488828
  0.46960000  -0.62488728
  0.46960000   0.62488828
  0.46960000  -0.62488728
  0.46960000   0.62488828
  0.46960000  -0.62488728
  0.46960000   0.62488828
  0.46960000  -0.62488728
  0.46960000   0.62488828
  0.46960000  -0.62488728
  0.46960000   0.62488827
  0.46960000  -0.62488728
  0.46960000   0.62488827
  0.46960000  -0.62488728
  0.46960000   0.62488827
  0.46960000  -0.62488728
  0.46960000   0.62488827
  0.46960000  -0.62488728
  0.46960000   0.62488827
  0.46960000  -0.62488729
  0.46960000   0.62488827
  0.46960000  -0.62488729
  0.46960000   0.62488827
  0.47040000  -0.62465836
  0.47040000   0.62465937
  0.47040000  -0.62465836
  0.47040000   0.62465937
  0.47040000  -0.62465836
  0.47040000   0.62465937
  0.47040000  -0.62465836
  0.47040000   0.62465937
  0.47040000  -0.62465836
  0.47040000   0.62465937
  0.47040000  -0.62465836
  0.47040000   0.62465937
  0.47040000  -0.62465836
  0.47040000   0.62465937
  0.47040000  -0.62465837
  0.47040000   0.62465937
  0.47040000  -0.62465837
  0.47040000   0.62465937
  0.47040000  -0.62465837
  0.47040000   0.62465937
  0.47040000  -0.62465837
  0.47040000   0.62465936
  0.47040000  -0.62465837
  0.47040000   0.62465936
  0.47040000  -0.62465837
  0.47040000   0.62465936
  0.47040000  -0.62465837
  0.47040000   0.62465936
  0.47040000  -0.62465837
  0.47040000   0.62465936
  0.47040000  -0.62465837
  0.47040000   0.62465936
  0.47040000  -0.62465837
  0.47040000   0.62465936
  0.47040000  -0.62465838
  0.47040000   0.62465936
  0.47040000  -0.62465838
  0.47040000   0.62465936
  0.47040000  -0.62465838
  0.47040000   0.62465936
  0.47120000  -0.62442913
  0.47120000   0.62443014
  0.47120000  -0.62442913
  0.47120000   0.62443014
  0.47120000  -0.62442913
  0.47120000   0.62443014
  0.47120000  -0.62442913
  0.47120000   0.62443014
  0.47120000  -0.62442913
  0.47120000   0.62443014
  0.47120000  -0.62442913
  0.47120000   0.62443014
  0.47120000  -0.62442914
  0.47120000   0.62443014
  0.47120000  -0.62442914
  0.47120000   0.62443013
  0.47120000  -0.62442914
  0.47120000   0.62443013
  0.47120000  -0.62442914
  0.47120000   0.62443013
  0.47120000  -0.62442914
  0.47120000   0.62443013
  0.47120000  -0.62442914
  0.47120000   0.62443013
  0.47120000  -0.62442914
  0.47120000   0.62443013
  0.47120000  -0.62442914
  0.47120000   0.62443013
  0.47120000  -0.62442914
  0.47120000   0.62443013
  0.47120000  -0.62442914
  0.47120000   0.62443013
  0.47120000  -0.62442915
  0.47120000   0.62443013
  0.47120000  -0.62442915
  0.47120000   0.62443012
  0.47120000  -0.62442915
  0.47120000   0.62443012
  0.47120000  -0.62442915
  0.47120000   0.62443012
  0.47200000  -0.62419958
  0.47200000   0.62420059
  0.47200000  -0.62419958
  0.47200000   0.62420059
  0.47200000  -0.62419958
  0.47200000   0.62420059
  0.47200000  -0.62419958
  0.47200000   0.62420058
  0.47200000  -0.62419958
  0.47200000   0.62420058
  0.47200000  -0.62419959
  0.47200000   0.62420058
  0.47200000  -0.62419959
  0.47200000   0.62420058
  0.47200000  -0.62419959
  0.47200000   0.62420058
  0.47200000  -0.62419959
  0.47200000   0.62420058
  0.47200000  -0.62419959
  0.47200000   0.62420058
  0.47200000  -0.62419959
  0.47200000   0.62420058
  0.47200000  -0.62419959
  0.47200000   0.62420058
  0.47200000  -0.62419959
  0.47200000   0.62420058
  0.47200000  -0.62419959
  0.47200000   0.62420057
  0.47200000  -0.62419959
  0.47200000   0.62420057
  0.47200000  -0.62419960
  0.47200000   0.62420057
  0.47200000  -0.62419960
  0.47200000   0.62420057
  0.47200000  -0.62419960
  0.47200000   0.62420057
  0.47200000  -0.62419960
  0.47200000   0.62420057
  0.47200000  -0.62419960
  0.47200000   0.62420057
  0.47280000  -0.62396971
  0.47280000   0.62397071
  0.47280000  -0.62396971
  0.47280000   0.62397071
  0.47280000  -0.62396971
  0.47280000   0.62397071
  0.47280000  -0.62396971
  0.47280000   0.62397071
  0.47280000  -0.62396971
  0.47280000   0.62397071
  0.47280000  -0.62396971
  0.47280000   0.62397071
  0.47280000  -0.62396972
  0.47280000   0.62397071
  0.47280000  -0.62396972
  0.47280000   0.62397071
  0.47280000  -0.62396972
  0.47280000   0.62397070
  0.47280000  -0.62396972
  0.47280000   0.62397070
  0.47280000  -0.62396972
  0.47280000   0.62397070
  0.47280000  -0.62396972
  0.47280000   0.62397070
  0.47280000  -0.62396972
  0.47280000   0.62397070
  0.47280000  -0.62396972
  0.47280000   0.62397070
  0.47280000  -0.62396972
  0.47280000   0.62397070
  0.47280000  -0.62396972
  0.47280000   0.62397070
  0.47280000  -0.62396973
  0.47280000   0.62397070
  0.47280000  -0.62396973
  0.47280000   0.62397070
  0.47280000  -0.62396973
  0.47280000   0.62397069
  0.47280000  -0.62396973
  0.47280000   0.62397069
  0.47360000  -0.62373952
  0.47360000   0.62374052
  0.47360000  -0.62373952
  0.47360000   0.62374051
  0.47360000  -0.62373952
  0.47360000   0.62374051
  0.47360000  -0.62373952
  0.47360000   0.62374051
  0.47360000  -0.62373952
  0.47360000   0.62374051
  0.47360000  -0.62373952
  0.47360000   0.62374051
  0.47360000  -0.62373952
  0.47360000   0.62374051
  0.47360000  -0.62373952
  0.47360000   0.62374051
  0.47360000  -0.62373952
  0.47360000   0.62374051
  0.47360000  -0.62373952
  0.47360000   0.62374051
  0.47360000  -0.62373953
  0.47360000   0.62374051
  0.47360000  -0.62373953
  0.47360000   0.62374050
  0.47360000  -0.62373953
  0.47360000   0.62374050
  0.47360000  -0.62373953
  0.47360000   0.62374050
  0.47360000  -0.62373953
  0.47360000   0.62374050
  0.47360000  -0.62373953
  0.47360000   0.62374050
  0.47360000  -0.62373953
  0.47360000   0.62374050
  0.47360000  -0.62373953
  0.47360000   0.62374050
  0.47360000  -0.62373953
  0.47360000   0.62374050
  0.47360000  -0.62373953
  0.47360000   0.62374050
  0.47440000  -0.62350900
  0.47440000   0.62350999
  0.47440000  -0.62350900
  0.47440000   0.62350999
  0.47440000  -0.62350900
  0.47440000   0.62350999
  0.47440000  -0.62350900
  0.47440000   0.62350999
  0.47440000  -0.62350900
  0.47440000   0.62350999
  0.47440000  -0.62350900
  0.47440000   0.62350999
  0.47440000  -0.62350901
  0.47440000   0.62350999
  0.47440000  -0.62350901
  0.47440000   0.62350999
  0.47440000  -0.62350901
  0.47440000   0.62350999
  0.47440000  -0.62350901
  0.47440000   0.62350999
  0.47440000  -0.62350901
  0.47440000   0.62350998
  0.47440000  -0.62350901
  0.47440000   0.62350998
  0.47440000  -0.62350901
  0.47440000   0.62350998
  0.47440000  -0.62350901
  0.47440000   0.62350998
  0.47440000  -0.62350901
  0.47440000   0.62350998
  0.47440000  -0.62350901
  0.47440000   0.62350998
  0.47440000  -0.62350902
  0.47440000   0.62350998
  0.47440000  -0.62350902
  0.47440000   0.62350998
  0.47440000  -0.62350902
  0.47440000   0.62350998
  0.47440000  -0.62350902
  0.47440000   0.62350998
  0.47520000  -0.62327816
  0.47520000   0.62327915
  0.47520000  -0.62327816
  0.47520000   0.62327915
  0.47520000  -0.62327816
  0.47520000   0.62327915
  0.47520000  -0.62327816
  0.47520000   0.62327915
  0.47520000  -0.62327816
  0.47520000   0.62327915
  0.47520000  -0.62327816
  0.47520000   0.62327915
  0.47520000  -0.62327817
  0.47520000   0.62327914
  0.47520000  -0.62327817
  0.47520000   0.62327914
  0.47520000  -0.62327817
  0.47520000   0.62327914
  0.47520000  -0.62327817
  0.47520000   0.62327914
  0.47520000  -0.62327817
  0.47520000   0.62327914
  0.47520000  -0.62327817
  0.47520000   0.62327914
  0.47520000  -0.62327817
  0.47520000   0.62327914
  0.47520000  -0.62327817
  0.47520000   0.62327914
  0.47520000  -0.62327817
  0.47520000   0.62327914
  0.47520000  -0.62327817
  0.47520000   0.62327914
  0.47520000  -0.62327818
  0.47520000   0.62327914
  0.47520000  -0.62327818
  0.47520000   0.62327913
  0.47520000  -0.62327818
  0.47520000   0.62327913
  0.47520000  -0.62327818
  0.47520000   0.62327913
  0.47600000  -0.62304700
  0.47600000   0.62304798
  0.47600000  -0.62304700
  0.47600000   0.62304798
  0.47600000  -0.62304700
  0.47600000   0.62304798
  0.47600000  -0.62304700
  0.47600000   0.62304798
  0.47600000  -0.62304700
  0.47600000   0.62304798
  0.47600000  -0.62304700
  0.47600000   0.62304798
  0.47600000  -0.62304700
  0.47600000   0.62304798
  0.47600000  -0.62304700
  0.47600000   0.62304798
  0.47600000  -0.62304700
  0.47600000   0.62304797
  0.47600000  -0.62304700
  0.47600000   0.62304797
  0.47600000  -0.62304701
  0.47600000   0.62304797
  0.47600000  -0.62304701
  0.47600000   0.62304797
  0.47600000  -0.62304701
  0.47600000   0.62304797
  0.47600000  -0.62304701
  0.47600000   0.62304797
  0.47600000  -0.62304701
  0.47600000   0.62304797
  0.47600000  -0.62304701
  0.47600000   0.62304797
  0.47600000  -0.62304701
  0.47600000   0.62304797
  0.47600000  -0.62304701
  0.47600000   0.62304797
  0.47600000  -0.62304701
  0.47600000   0.62304796
  0.47600000  -0.62304701
  0.47600000   0.62304796
  0.47680000  -0.62281551
  0.47680000   0.62281649
  0.47680000  -0.62281551
  0.47680000   0.62281649
  0.47680000  -0.62281551
  0.47680000   0.62281649
  0.47680000  -0.62281551
  0.47680000   0.62281649
  0.47680000  -0.62281551
  0.47680000   0.62281649
  0.47680000  -0.62281551
  0.47680000   0.62281648
  0.47680000  -0.62281551
  0.47680000   0.62281648
  0.47680000  -0.62281551
  0.47680000   0.62281648
  0.47680000  -0.62281551
  0.47680000   0.62281648
  0.47680000  -0.62281552
  0.47680000   0.62281648
  0.47680000  -0.62281552
  0.47680000   0.62281648
  0.47680000  -0.62281552
  0.47680000   0.62281648
  0.47680000  -0.62281552
  0.47680000   0.62281648
  0.47680000  -0.62281552
  0.47680000   0.62281648
  0.47680000  -0.62281552
  0.47680000   0.62281648
  0.47680000  -0.62281552
  0.47680000   0.62281647
  0.47680000  -0.62281552
  0.47680000   0.62281647
  0.47680000  -0.62281552
  0.47680000   0.62281647
  0.47680000  -0.62281552
  0.47680000   0.62281647
  0.47680000  -0.62281552
  0.47680000   0.62281647
  0.47760000  -0.62258369
  0.47760000   0.62258467
  0.47760000  -0.62258369
  0.47760000   0.62258467
  0.47760000  -0.62258369
  0.47760000   0.62258467
  0.47760000  -0.62258369
  0.47760000   0.62258467
  0.47760000  -0.62258369
  0.47760000   0.62258467
  0.47760000  -0.62258370
  0.47760000   0.62258466
  0.47760000  -0.62258370
  0.47760000   0.62258466
  0.47760000  -0.62258370
  0.47760000   0.62258466
  0.47760000  -0.62258370
  0.47760000   0.62258466
  0.47760000  -0.62258370
  0.47760000   0.62258466
  0.47760000  -0.62258370
  0.47760000   0.62258466
  0.47760000  -0.62258370
  0.47760000   0.62258466
  0.47760000  -0.62258370
  0.47760000   0.62258466
  0.47760000  -0.62258370
  0.47760000   0.62258466
  0.47760000  -0.62258370
  0.47760000   0.62258466
  0.47760000  -0.62258371
  0.47760000   0.62258466
  0.47760000  -0.62258371
  0.47760000   0.62258465
  0.47760000  -0.62258371
  0.47760000   0.62258465
  0.47760000  -0.62258371
  0.47760000   0.62258465
  0.47760000  -0.62258371
  0.47760000   0.62258465
  0.47840000  -0.62235155
  0.47840000   0.62235252
  0.47840000  -0.62235155
  0.47840000   0.62235252
  0.47840000  -0.62235155
  0.47840000   0.62235252
  0.47840000  -0.62235155
  0.47840000   0.62235252
  0.47840000  -0.62235155
  0.47840000   0.62235252
  0.47840000  -0.62235155
  0.47840000   0.62235252
  0.47840000  -0.62235156
  0.47840000   0.62235252
  0.47840000  -0.62235156
  0.47840000   0.62235252
  0.47840000  -0.62235156
  0.47840000   0.62235252
  0.47840000  -0.62235156
  0.47840000   0.62235252
  0.47840000  -0.62235156
  0.47840000   0.62235251
  0.47840000  -0.62235156
  0.47840000   0.62235251
  0.47840000  -0.62235156
  0.47840000   0.62235251
  0.47840000  -0.62235156
  0.47840000   0.62235251
  0.47840000  -0.62235156
  0.47840000   0.62235251
  0.47840000  -0.62235156
  0.47840000   0.62235251
  0.47840000  -0.62235156
  0.47840000   0.62235251
  0.47840000  -0.62235157
  0.47840000   0.62235251
  0.47840000  -0.62235157
  0.47840000   0.62235251
  0.47840000  -0.62235157
  0.47840000   0.62235251
  0.47920000  -0.62211908
  0.47920000   0.62212005
  0.47920000  -0.62211908
  0.47920000   0.62212005
  0.47920000  -0.62211908
  0.47920000   0.62212005
  0.47920000  -0.62211908
  0.47920000   0.62212005
  0.47920000  -0.62211908
  0.47920000   0.62212005
  0.47920000  -0.62211908
  0.47920000   0.62212005
  0.47920000  -0.62211909
  0.47920000   0.62212004
  0.47920000  -0.62211909
  0.47920000   0.62212004
  0.47920000  -0.62211909
  0.47920000   0.62212004
  0.47920000  -0.62211909
  0.47920000   0.62212004
  0.47920000  -0.62211909
  0.47920000   0.62212004
  0.47920000  -0.62211909
  0.47920000   0.62212004
  0.47920000  -0.62211909
  0.47920000   0.62212004
  0.47920000  -0.62211909
  0.47920000   0.62212004
  0.47920000  -0.62211909
  0.47920000   0.62212004
  0.47920000  -0.62211909
  0.47920000   0.62212004
  0.47920000  -0.62211910
  0.47920000   0.62212004
  0.47920000  -0.62211910
  0.47920000   0.62212003
  0.47920000  -0.62211910
  0.47920000   0.62212003
  0.47920000  -0.62211910
  0.47920000   0.62212003
  0.48000000  -0.62188628
  0.48000000   0.62188725
  0.48000000  -0.62188628
  0.48000000   0.62188725
  0.48000000  -0.62188628
  0.48000000   0.62188725
  0.48000000  -0.62188629
  0.48000000   0.62188725
  0.48000000  -0.62188629
  0.48000000   0.62188725
  0.48000000  -0.62188629
  0.48000000   0.62188724
  0.48000000  -0.62188629
  0.48000000   0.62188724
  0.48000000  -0.62188629
  0.48000000   0.62188724
  0.48000000  -0.62188629
  0.48000000   0.62188724
  0.48000000  -0.62188629
  0.48000000   0.62188724
  0.48000000  -0.62188629
  0.48000000   0.62188724
  0.48000000  -0.62188629
  0.48000000   0.62188724
  0.48000000  -0.62188629
  0.48000000   0.62188724
  0.48000000  -0.62188630
  0.48000000   0.62188724
  0.48000000  -0.62188630
  0.48000000   0.62188724
  0.48000000  -0.62188630
  0.48000000   0.62188724
  0.48000000  -0.62188630
  0.48000000   0.62188723
  0.48000000  -0.62188630
  0.48000000   0.62188723
  0.48000000  -0.62188630
  0.48000000   0.62188723
  0.48000000  -0.62188630
  0.48000000   0.62188723
  0.48080000  -0.62165316
  0.48080000   0.62165412
  0.48080000  -0.62165316
  0.48080000   0.62165412
  0.48080000  -0.62165316
  0.48080000   0.62165412
  0.48080000  -0.62165316
  0.48080000   0.62165412
  0.48080000  -0.62165316
  0.48080000   0.62165412
  0.48080000  -0.62165316
  0.48080000   0.62165411
  0.48080000  -0.62165316
  0.48080000   0.62165411
  0.48080000  -0.62165316
  0.48080000   0.62165411
  0.48080000  -0.62165316
  0.48080000   0.62165411
  0.48080000  -0.62165317
  0.48080000   0.62165411
  0.48080000  -0.62165317
  0.48080000   0.62165411
  0.48080000  -0.62165317
  0.48080000   0.62165411
  0.48080000  -0.62165317
  0.48080000   0.62165411
  0.48080000  -0.62165317
  0.48080000   0.62165411
  0.48080000  -0.62165317
  0.48080000   0.62165411
  0.48080000  -0.62165317
  0.48080000   0.62165411
  0.48080000  -0.62165317
  0.48080000   0.62165410
  0.48080000  -0.62165317
  0.48080000   0.62165410
  0.48080000  -0.62165317
  0.48080000   0.62165410
  0.48080000  -0.62165318
  0.48080000   0.62165410
  0.48160000  -0.62141970
  0.48160000   0.62142066
  0.48160000  -0.62141970
  0.48160000   0.62142066
  0.48160000  -0.62141970
  0.48160000   0.62142066
  0.48160000  -0.62141970
  0.48160000   0.62142066
  0.48160000  -0.62141971
  0.48160000   0.62142066
  0.48160000  -0.62141971
  0.48160000   0.62142066
  0.48160000  -0.62141971
  0.48160000   0.62142065
  0.48160000  -0.62141971
  0.48160000   0.62142065
  0.48160000  -0.62141971
  0.48160000   0.62142065
  0.48160000  -0.62141971
  0.48160000   0.62142065
  0.48160000  -0.62141971
  0.48160000   0.62142065
  0.48160000  -0.62141971
  0.48160000   0.62142065
  0.48160000  -0.62141971
  0.48160000   0.62142065
  0.48160000  -0.62141971
  0.48160000   0.62142065
  0.48160000  -0.62141971
  0.48160000   0.62142065
  0.48160000  -0.62141972
  0.48160000   0.62142065
  0.48160000  -0.62141972
  0.48160000   0.62142064
  0.48160000  -0.62141972
  0.48160000   0.62142064
  0.48160000  -0.62141972
  0.48160000   0.62142064
  0.48160000  -0.62141972
  0.48160000   0.62142064
  0.48240000  -0.62118592
  0.48240000   0.62118687
  0.48240000  -0.62118592
  0.48240000   0.62118687
  0.48240000  -0.62118592
  0.48240000   0.62118687
  0.48240000  -0.62118592
  0.48240000   0.62118687
  0.48240000  -0.62118592
  0.48240000   0.62118687
  0.48240000  -0.62118592
  0.48240000   0.62118687
  0.48240000  -0.62118592
  0.48240000   0.62118686
  0.48240000  -0.62118592
  0.48240000   0.62118686
  0.48240000  -0.62118592
  0.48240000   0.62118686
  0.48240000  -0.62118592
  0.48240000   0.62118686
  0.48240000  -0.62118593
  0.48240000   0.62118686
  0.48240000  -0.62118593
  0.48240000   0.62118686
  0.48240000  -0.62118593
  0.48240000   0.62118686
  0.48240000  -0.62118593
  0.48240000   0.62118686
  0.48240000  -0.62118593
  0.48240000   0.62118686
  0.48240000  -0.62118593
  0.48240000   0.62118686
  0.48240000  -0.62118593
  0.48240000   0.62118685
  0.48240000  -0.62118593
  0.48240000   0.62118685
  0.48240000  -0.62118593
  0.48240000   0.62118685
  0.48240000  -0.62118593
  0.48240000   0.62118685
  0.48320000  -0.62095180
  0.48320000   0.62095275
  0.48320000  -0.62095180
  0.48320000   0.62095275
  0.48320000  -0.62095180
  0.48320000   0.62095275
  0.48320000  -0.62095180
  0.48320000   0.62095275
  0.48320000  -0.62095180
  0.48320000   0.62095275
  0.48320000  -0.62095180
  0.48320000   0.62095274
  0.48320000  -0.62095180
  0.48320000   0.62095274
  0.48320000  -0.62095181
  0.48320000   0.62095274
  0.48320000  -0.62095181
  0.48320000   0.62095274
  0.48320000  -0.62095181
  0.48320000   0.62095274
  0.48320000  -0.62095181
  0.48320000   0.62095274
  0.48320000  -0.62095181
  0.48320000   0.62095274
  0.48320000  -0.62095181
  0.48320000   0.62095274
  0.48320000  -0.62095181
  0.48320000   0.62095274
  0.48320000  -0.62095181
  0.48320000   0.62095274
  0.48320000  -0.62095181
  0.48320000   0.62095273
  0.48320000  -0.62095181
  0.48320000   0.62095273
  0.48320000  -0.62095181
  0.48320000   0.62095273
  0.48320000  -0.62095182
  0.48320000   0.62095273
  0.48320000  -0.62095182
  0.48320000   0.62095273
  0.48400000  -0.62071735
  0.48400000   0.62071830
  0.48400000  -0.62071735
  0.48400000   0.62071830
  0.48400000  -0.62071735
  0.48400000   0.62071829
  0.48400000  -0.62071735
  0.48400000   0.62071829
  0.48400000  -0.62071735
  0.48400000   0.62071829
  0.48400000  -0.62071735
  0.48400000   0.62071829
  0.48400000  -0.62071736
  0.48400000   0.62071829
  0.48400000  -0.62071736
  0.48400000   0.62071829
  0.48400000  -0.62071736
  0.48400000   0.62071829
  0.48400000  -0.62071736
  0.48400000   0.62071829
  0.48400000  -0.62071736
  0.48400000   0.62071829
  0.48400000  -0.62071736
  0.48400000   0.62071829
  0.48400000  -0.62071736
  0.48400000   0.62071829
  0.48400000  -0.62071736
  0.48400000   0.62071828
  0.48400000  -0.62071736
  0.48400000   0.62071828
  0.48400000  -0.62071736
  0.48400000   0.62071828
  0.48400000  -0.62071736
  0.48400000   0.62071828
  0.48400000  -0.62071737
  0.48400000   0.62071828
  0.48400000  -0.62071737
  0.48400000   0.62071828
  0.48400000  -0.62071737
  0.48400000   0.62071828
  0.48480000  -0.62048257
  0.48480000   0.62048351
  0.48480000  -0.62048257
  0.48480000   0.62048351
  0.48480000  -0.62048257
  0.48480000   0.62048351
  0.48480000  -0.62048257
  0.48480000   0.62048351
  0.48480000  -0.62048257
  0.48480000   0.62048351
  0.48480000  -0.62048257
  0.48480000   0.62048351
  0.48480000  -0.62048257
  0.48480000   0.62048351
  0.48480000  -0.62048258
  0.48480000   0.62048350
  0.48480000  -0.62048258
  0.48480000   0.62048350
  0.48480000  -0.62048258
  0.48480000   0.62048350
  0.48480000  -0.62048258
  0.48480000   0.62048350
  0.48480000  -0.62048258
  0.48480000   0.62048350
  0.48480000  -0.62048258
  0.48480000   0.62048350
  0.48480000  -0.62048258
  0.48480000   0.62048350
  0.48480000  -0.62048258
  0.48480000   0.62048350
  0.48480000  -0.62048258
  0.48480000   0.62048350
  0.48480000  -0.62048258
  0.48480000   0.62048350
  0.48480000  -0.62048258
  0.48480000   0.62048350
  0.48480000  -0.62048259
  0.48480000   0.62048349
  0.48480000  -0.62048259
  0.48480000   0.62048349
  0.48560000  -0.62024745
  0.48560000   0.62024839
  0.48560000  -0.62024745
  0.48560000   0.62024839
  0.48560000  -0.62024746
  0.48560000   0.62024839
  0.48560000  -0.62024746
  0.48560000   0.62024839
  0.48560000  -0.62024746
  0.48560000   0.62024839
  0.48560000  -0.62024746
  0.48560000   0.62024839
  0.48560000  -0.62024746
  0.48560000   0.62024839
  0.48560000  -0.62024746
  0.48560000   0.62024839
  0.48560000  -0.62024746
  0.48560000   0.62024839
  0.48560000  -0.62024746
  0.48560000   0.62024838
  0.48560000  -0.62024746
  0.48560000   0.62024838
  0.48560000  -0.62024746
  0.48560000   0.62024838
  0.48560000  -0.62024747
  0.48560000   0.62024838
  0.48560000  -0.62024747
  0.48560000   0.62024838
  0.48560000  -0.62024747
  0.48560000   0.62024838
  0.48560000  -0.62024747
  0.48560000   0.62024838
  0.48560000  -0.62024747
  0.48560000   0.62024838
  0.48560000  -0.62024747
  0.48560000   0.62024838
  0.48560000  -0.62024747
  0.48560000   0.62024838
  0.48560000  -0.62024747
  0.48560000   0.62024838
  0.48640000  -0.62001201
  0.48640000   0.62001294
  0.48640000  -0.62001201
  0.48640000   0.62001294
  0.48640000  -0.62001201
  0.48640000   0.62001294
  0.48640000  -0.62001201
  0.48640000   0.62001294
  0.48640000  -0.62001201
  0.48640000   0.62001294
  0.48640000  -0.62001201
  0.48640000   0.62001294
  0.48640000  -0.62001201
  0.48640000   0.62001293
  0.48640000  -0.62001201
  0.48640000   0.62001293
  0.48640000  -0.62001201
  0.48640000   0.62001293
  0.48640000  -0.62001201
  0.48640000   0.62001293
  0.48640000  -0.62001201
  0.48640000   0.62001293
  0.48640000  -0.62001202
  0.48640000   0.62001293
  0.48640000  -0.62001202
  0.48640000   0.62001293
  0.48640000  -0.62001202
  0.48640000   0.62001293
  0.48640000  -0.62001202
  0.48640000   0.62001293
  0.48640000  -0.62001202
  0.48640000   0.62001293
  0.48640000  -0.62001202
  0.48640000   0.62001293
  0.48640000  -0.62001202
  0.48640000   0.62001292
  0.48640000  -0.62001202
  0.48640000   0.62001292
  0.48640000  -0.62001202
  0.48640000   0.62001292
  0.48720000  -0.61977622
  0.48720000   0.61977715
  0.48720000  -0.61977622
  0.48720000   0.61977715
  0.48720000  -0.61977622
  0.48720000   0.61977715
  0.48720000  -0.61977622
  0.48720000   0.61977715
  0.48720000  -0.61977623
  0.48720000   0.61977715
  0.48720000  -0.61977623
  0.48720000   0.61977715
  0.48720000  -0.61977623
  0.48720000   0.61977715
  0.48720000  -0.61977623
  0.48720000   0.61977715
  0.48720000  -0.61977623
  0.48720000   0.61977715
  0.48720000  -0.61977623
  0.48720000   0.61977714
  0.48720000  -0.61977623
  0.48720000   0.61977714
  0.48720000  -0.61977623
  0.48720000   0.61977714
  0.48720000  -0.61977623
  0.48720000   0.61977714
  0.48720000  -0.61977623
  0.48720000   0.61977714
  0.48720000  -0.61977623
  0.48720000   0.61977714
  0.48720000  -0.61977624
  0.48720000   0.61977714
  0.48720000  -0.61977624
  0.48720000   0.61977714
  0.48720000  -0.61977624
  0.48720000   0.61977714
  0.48720000  -0.61977624
  0.48720000   0.61977714
  0.48720000  -0.61977624
  0.48720000   0.61977714
  0.48800000  -0.61954010
  0.48800000   0.61954103
  0.48800000  -0.61954010
  0.48800000   0.61954103
  0.48800000  -0.61954010
  0.48800000   0.61954103
  0.48800000  -0.61954011
  0.48800000   0.61954103
  0.48800000  -0.61954011
  0.48800000   0.61954103
  0.48800000  -0.61954011
  0.48800000   0.61954102
  0.48800000  -0.61954011
  0.48800000   0.61954102
  0.48800000  -0.61954011
  0.48800000   0.61954102
  0.48800000  -0.61954011
  0.48800000   0.61954102
  0.48800000  -0.61954011
  0.48800000   0.61954102
  0.48800000  -0.61954011
  0.48800000   0.61954102
  0.48800000  -0.61954011
  0.48800000   0.61954102
  0.48800000  -0.61954011
  0.48800000   0.61954102
  0.48800000  -0.61954011
  0.48800000   0.61954102
  0.48800000  -0.61954012
  0.48800000   0.61954102
  0.48800000  -0.61954012
  0.48800000   0.61954102
  0.48800000  -0.61954012
  0.48800000   0.61954101
  0.48800000  -0.61954012
  0.48800000   0.61954101
  0.48800000  -0.61954012
  0.48800000   0.61954101
  0.48800000  -0.61954012
  0.48800000   0.61954101
  0.48880000  -0.61930365
  0.48880000   0.61930457
  0.48880000  -0.61930365
  0.48880000   0.61930457
  0.48880000  -0.61930365
  0.48880000   0.61930457
  0.48880000  -0.61930365
  0.48880000   0.61930457
  0.48880000  -0.61930365
  0.48880000   0.61930457
  0.48880000  -0.61930365
  0.48880000   0.61930457
  0.48880000  -0.61930365
  0.48880000   0.61930456
  0.48880000  -0.61930365
  0.48880000   0.61930456
  0.48880000  -0.61930365
  0.48880000   0.61930456
  0.48880000  -0.61930366
  0.48880000   0.61930456
  0.48880000  -0.61930366
  0.48880000   0.61930456
  0.48880000  -0.61930366
  0.48880000   0.61930456
  0.48880000  -0.61930366
  0.48880000   0.61930456
  0.48880000  -0.61930366
  0.48880000   0.61930456
  0.48880000  -0.61930366
  0.48880000   0.61930456
  0.48880000  -0.61930366
  0.48880000   0.61930456
  0.48880000  -0.61930366
  0.48880000   0.61930456
  0.48880000  -0.61930366
  0.48880000   0.61930455
  0.48880000  -0.61930366
  0.48880000   0.61930455
  0.48880000  -0.61930366
  0.48880000   0.61930455
  0.48960000  -0.61906685
  0.48960000   0.61906777
  0.48960000  -0.61906686
  0.48960000   0.61906777
  0.48960000  -0.61906686
  0.48960000   0.61906777
  0.48960000  -0.61906686
  0.48960000   0.61906777
  0.48960000  -0.61906686
  0.48960000   0.61906777
  0.48960000  -0.61906686
  0.48960000   0.61906777
  0.48960000  -0.61906686
  0.48960000   0.61906777
  0.48960000  -0.61906686
  0.48960000   0.61906777
  0.48960000  -0.61906686
  0.48960000   0.61906777
  0.48960000  -0.61906686
  0.48960000   0.61906777
  0.48960000  -0.61906686
  0.48960000   0.61906776
  0.48960000  -0.61906686
  0.48960000   0.61906776
  0.48960000  -0.61906687
  0.48960000   0.61906776
  0.48960000  -0.61906687
  0.48960000   0.61906776
  0.48960000  -0.61906687
  0.48960000   0.61906776
  0.48960000  -0.61906687
  0.48960000   0.61906776
  0.48960000  -0.61906687
  0.48960000   0.61906776
  0.48960000  -0.61906687
  0.48960000   0.61906776
  0.48960000  -0.61906687
  0.48960000   0.61906776
  0.48960000  -0.61906687
  0.48960000   0.61906776
  0.49040000  -0.61882972
  0.49040000   0.61883064
  0.49040000  -0.61882972
  0.49040000   0.61883064
  0.49040000  -0.61882973
  0.49040000   0.61883064
  0.49040000  -0.61882973
  0.49040000   0.61883064
  0.49040000  -0.61882973
  0.49040000   0.61883064
  0.49040000  -0.61882973
  0.49040000   0.61883063
  0.49040000  -0.61882973
  0.49040000   0.61883063
  0.49040000  -0.61882973
  0.49040000   0.61883063
  0.49040000  -0.61882973
  0.49040000   0.61883063
  0.49040000  -0.61882973
  0.49040000   0.61883063
  0.49040000  -0.61882973
  0.49040000   0.61883063
  0.49040000  -0.61882973
  0.49040000   0.61883063
  0.49040000  -0.61882973
  0.49040000   0.61883063
  0.49040000  -0.61882974
  0.49040000   0.61883063
  0.49040000  -0.61882974
  0.49040000   0.61883063
  0.49040000  -0.61882974
  0.49040000   0.61883063
  0.49040000  -0.61882974
  0.49040000   0.61883062
  0.49040000  -0.61882974
  0.49040000   0.61883062
  0.49040000  -0.61882974
  0.49040000   0.61883062
  0.49040000  -0.61882974
  0.49040000   0.61883062
  0.49120000  -0.61859225
  0.49120000   0.61859317
  0.49120000  -0.61859226
  0.49120000   0.61859317
  0.49120000  -0.61859226
  0.49120000   0.61859316
  0.49120000  -0.61859226
  0.49120000   0.61859316
  0.49120000  -0.61859226
  0.49120000   0.61859316
  0.49120000  -0.61859226
  0.49120000   0.61859316
  0.49120000  -0.61859226
  0.49120000   0.61859316
  0.49120000  -0.61859226
  0.49120000   0.61859316
  0.49120000  -0.61859226
  0.49120000   0.61859316
  0.49120000  -0.61859226
  0.49120000   0.61859316
  0.49120000  -0.61859226
  0.49120000   0.61859316
  0.49120000  -0.61859226
  0.49120000   0.61859316
  0.49120000  -0.61859227
  0.49120000   0.61859315
  0.49120000  -0.61859227
  0.49120000   0.61859315
  0.49120000  -0.61859227
  0.49120000   0.61859315
  0.49120000  -0.61859227
  0.49120000   0.61859315
  0.49120000  -0.61859227
  0.49120000   0.61859315
  0.49120000  -0.61859227
  0.49120000   0.61859315
  0.49120000  -0.61859227
  0.49120000   0.61859315
  0.49120000  -0.61859227
  0.49120000   0.61859315
  0.49200000  -0.61835445
  0.49200000   0.61835535
  0.49200000  -0.61835445
  0.49200000   0.61835535
  0.49200000  -0.61835445
  0.49200000   0.61835535
  0.49200000  -0.61835445
  0.49200000   0.61835535
  0.49200000  -0.61835445
  0.49200000   0.61835535
  0.49200000  -0.61835445
  0.49200000   0.61835535
  0.49200000  -0.61835445
  0.49200000   0.61835535
  0.49200000  -0.61835445
  0.49200000   0.61835535
  0.49200000  -0.61835445
  0.49200000   0.61835535
  0.49200000  -0.61835445
  0.49200000   0.61835535
  0.49200000  -0.61835445
  0.49200000   0.61835534
  0.49200000  -0.61835446
  0.49200000   0.61835534
  0.49200000  -0.61835446
  0.49200000   0.61835534
  0.49200000  -0.61835446
  0.49200000   0.61835534
  0.49200000  -0.61835446
  0.49200000   0.61835534
  0.49200000  -0.61835446
  0.49200000   0.61835534
  0.49200000  -0.61835446
  0.49200000   0.61835534
  0.49200000  -0.61835446
  0.49200000   0.61835534
  0.49200000  -0.61835446
  0.49200000   0.61835534
  0.49200000  -0.61835446
  0.49200000   0.61835534
  0.49280000  -0.61811630
  0.49280000   0.61811720
  0.49280000  -0.61811630
  0.49280000   0.61811720
  0.49280000  -0.61811630
  0.49280000   0.61811720
  0.49280000  -0.61811630
  0.49280000   0.61811720
  0.49280000  -0.61811630
  0.49280000   0.61811720
  0.49280000  -0.61811630
  0.49280000   0.61811720
  0.49280000  -0.61811630
  0.49280000   0.61811719
  0.49280000  -0.61811630
  0.49280000   0.61811719
  0.49280000  -0.61811630
  0.49280000   0.61811719
  0.49280000  -0.61811630
  0.49280000   0.61811719
  0.49280000  -0.61811631
  0.49280000   0.61811719
  0.49280000  -0.61811631
  0.49280000   0.61811719
  0.49280000  -0.61811631
  0.49280000   0.61811719
  0.49280000  -0.61811631
  0.49280000   0.61811719
  0.49280000  -0.61811631
  0.49280000   0.61811719
  0.49280000  -0.61811631
  0.49280000   0.61811719
  0.49280000  -0.61811631
  0.49280000   0.61811719
  0.49280000  -0.61811631
  0.49280000   0.61811719
  0.49280000  -0.61811631
  0.49280000   0.61811718
  0.49280000  -0.61811631
  0.49280000   0.61811718
  0.49360000  -0.61787781
  0.49360000   0.61787871
  0.49360000  -0.61787781
  0.49360000   0.61787871
  0.49360000  -0.61787781
  0.49360000   0.61787870
  0.49360000  -0.61787781
  0.49360000   0.61787870
  0.49360000  -0.61787781
  0.49360000   0.61787870
  0.49360000  -0.61787781
  0.49360000   0.61787870
  0.49360000  -0.61787781
  0.49360000   0.61787870
  0.49360000  -0.61787781
  0.49360000   0.61787870
  0.49360000  -0.61787781
  0.49360000   0.61787870
  0.49360000  -0.61787781
  0.49360000   0.61787870
  0.49360000  -0.61787782
  0.49360000   0.61787870
  0.49360000  -0.61787782
  0.49360000   0.61787870
  0.49360000  -0.61787782
  0.49360000   0.61787870
  0.49360000  -0.61787782
  0.49360000   0.61787869
  0.49360000  -0.61787782
  0.49360000   0.61787869
  0.49360000  -0.61787782
  0.49360000   0.61787869
  0.49360000  -0.61787782
  0.49360000   0.61787869
  0.49360000  -0.61787782
  0.49360000   0.61787869
  0.49360000  -0.61787782
  0.49360000   0.61787869
  0.49360000  -0.61787782
  0.49360000   0.61787869
  0.49440000  -0.61763897
  0.49440000   0.61763987
  0.49440000  -0.61763897
  0.49440000   0.61763987
  0.49440000  -0.61763898
  0.49440000   0.61763987
  0.49440000  -0.61763898
  0.49440000   0.61763987
  0.49440000  -0.61763898
  0.49440000   0.61763987
  0.49440000  -0.61763898
  0.49440000   0.61763987
  0.49440000  -0.61763898
  0.49440000   0.61763987
  0.49440000  -0.61763898
  0.49440000   0.61763986
  0.49440000  -0.61763898
  0.49440000   0.61763986
  0.49440000  -0.61763898
  0.49440000   0.61763986
  0.49440000  -0.61763898
  0.49440000   0.61763986
  0.49440000  -0.61763898
  0.49440000   0.61763986
  0.49440000  -0.61763898
  0.49440000   0.61763986
  0.49440000  -0.61763899
  0.49440000   0.61763986
  0.49440000  -0.61763899
  0.49440000   0.61763986
  0.49440000  -0.61763899
  0.49440000   0.61763986
  0.49440000  -0.61763899
  0.49440000   0.61763986
  0.49440000  -0.61763899
  0.49440000   0.61763986
  0.49440000  -0.61763899
  0.49440000   0.61763985
  0.49440000  -0.61763899
  0.49440000   0.61763985
  0.49520000  -0.61739980
  0.49520000   0.61740069
  0.49520000  -0.61739980
  0.49520000   0.61740069
  0.49520000  -0.61739980
  0.49520000   0.61740069
  0.49520000  -0.61739980
  0.49520000   0.61740069
  0.49520000  -0.61739980
  0.49520000   0.61740069
  0.49520000  -0.61739980
  0.49520000   0.61740069
  0.49520000  -0.61739980
  0.49520000   0.61740069
  0.49520000  -0.61739981
  0.49520000   0.61740069
  0.49520000  -0.61739981
  0.49520000   0.61740069
  0.49520000  -0.61739981
  0.49520000   0.61740068
  0.49520000  -0.61739981
  0.49520000   0.61740068
  0.49520000  -0.61739981
  0.49520000   0.61740068
  0.49520000  -0.61739981
  0.49520000   0.61740068
  0.49520000  -0.61739981
  0.49520000   0.61740068
  0.49520000  -0.61739981
  0.49520000   0.61740068
  0.49520000  -0.61739981
  0.49520000   0.61740068
  0.49520000  -0.61739981
  0.49520000   0.61740068
  0.49520000  -0.61739981
  0.49520000   0.61740068
  0.49520000  -0.61739982
  0.49520000   0.61740068
  0.49520000  -0.61739982
  0.49520000   0.61740068
  0.49600000  -0.61716028
  0.49600000   0.61716117
  0.49600000  -0.61716028
  0.49600000   0.61716117
  0.49600000  -0.61716028
  0.49600000   0.61716117
  0.49600000  -0.61716028
  0.49600000   0.61716117
  0.49600000  -0.61716028
  0.49600000   0.61716117
  0.49600000  -0.61716029
  0.49600000   0.61716117
  0.49600000  -0.61716029
  0.49600000   0.61716117
  0.49600000  -0.61716029
  0.49600000   0.61716116
  0.49600000  -0.61716029
  0.49600000   0.61716116
  0.49600000  -0.61716029
  0.49600000   0.61716116
  0.49600000  -0.61716029
  0.49600000   0.61716116
  0.49600000  -0.61716029
  0.49600000   0.61716116
  0.49600000  -0.61716029
  0.49600000   0.61716116
  0.49600000  -0.61716029
  0.49600000   0.61716116
  0.49600000  -0.61716029
  0.49600000   0.61716116
  0.49600000  -0.61716029
  0.49600000   0.61716116
  0.49600000  -0.61716030
  0.49600000   0.61716116
  0.49600000  -0.61716030
  0.49600000   0.61716116
  0.49600000  -0.61716030
  0.49600000   0.61716115
  0.49600000  -0.61716030
  0.49600000   0.61716115
  0.49680000  -0.61692042
  0.49680000   0.61692130
  0.49680000  -0.61692042
  0.49680000   0.61692130
  0.49680000  -0.61692042
  0.49680000   0.61692130
  0.49680000  -0.61692042
  0.49680000   0.61692130
  0.49680000  -0.61692042
  0.49680000   0.61692130
  0.49680000  -0.61692042
  0.49680000   0.61692130
  0.49680000  -0.61692042
  0.49680000   0.61692130
  0.49680000  -0.61692043
  0.49680000   0.61692130
  0.49680000  -0.61692043
  0.49680000   0.61692130
  0.49680000  -0.61692043
  0.49680000   0.61692130
  0.49680000  -0.61692043
  0.49680000   0.61692130
  0.49680000  -0.61692043
  0.49680000   0.61692129
  0.49680000  -0.61692043
  0.49680000   0.61692129
  0.49680000  -0.61692043
  0.49680000   0.61692129
  0.49680000  -0.61692043
  0.49680000   0.61692129
  0.49680000  -0.61692043
  0.49680000   0.61692129
  0.49680000  -0.61692043
  0.49680000   0.61692129
  0.49680000  -0.61692043
  0.49680000   0.61692129
  0.49680000  -0.61692043
  0.49680000   0.61692129
  0.49680000  -0.61692044
  0.49680000   0.61692129
  0.49760000  -0.61668021
  0.49760000   0.61668109
  0.49760000  -0.61668021
  0.49760000   0.61668109
  0.49760000  -0.61668021
  0.49760000   0.61668109
  0.49760000  -0.61668021
  0.49760000   0.61668109
  0.49760000  -0.61668022
  0.49760000   0.61668109
  0.49760000  -0.61668022
  0.49760000   0.61668109
  0.49760000  -0.61668022
  0.49760000   0.61668109
  0.49760000  -0.61668022
  0.49760000   0.61668109
  0.49760000  -0.61668022
  0.49760000   0.61668109
  0.49760000  -0.61668022
  0.49760000   0.61668109
  0.49760000  -0.61668022
  0.49760000   0.61668108
  0.49760000  -0.61668022
  0.49760000   0.61668108
  0.49760000  -0.61668022
  0.49760000   0.61668108
  0.49760000  -0.61668022
  0.49760000   0.61668108
  0.49760000  -0.61668022
  0.49760000   0.61668108
  0.49760000  -0.61668023
  0.49760000   0.61668108
  0.49760000  -0.61668023
  0.49760000   0.61668108
  0.49760000  -0.61668023
  0.49760000   0.61668108
  0.49760000  -0.61668023
  0.49760000   0.61668108
  0.49760000  -0.61668023
  0.49760000   0.61668108
  0.49840000  -0.61643966
  0.49840000   0.61644054
  0.49840000  -0.61643966
  0.49840000   0.61644054
  0.49840000  -0.61643966
  0.49840000   0.61644054
  0.49840000  -0.61643966
  0.49840000   0.61644053
  0.49840000  -0.61643966
  0.49840000   0.61644053
  0.49840000  -0.61643966
  0.49840000   0.61644053
  0.49840000  -0.61643966
  0.49840000   0.61644053
  0.49840000  -0.61643966
  0.49840000   0.61644053
  0.49840000  -0.61643967
  0.49840000   0.61644053
  0.49840000  -0.61643967
  0.49840000   0.61644053
  0.49840000  -0.61643967
  0.49840000   0.61644053
  0.49840000  -0.61643967
  0.49840000   0.61644053
  0.49840000  -0.61643967
  0.49840000   0.61644053
  0.49840000  -0.61643967
  0.49840000   0.61644053
  0.49840000  -0.61643967
  0.49840000   0.61644052
  0.49840000  -0.61643967
  0.49840000   0.61644052
  0.49840000  -0.61643967
  0.49840000   0.61644052
  0.49840000  -0.61643967
  0.49840000   0.61644052
  0.49840000  -0.61643967
  0.49840000   0.61644052
  0.49840000  -0.61643968
  0.49840000   0.61644052
  0.49920000  -0.61619876
  0.49920000   0.61619963
  0.49920000  -0.61619876
  0.49920000   0.61619963
  0.49920000  -0.61619876
  0.49920000   0.61619963
  0.49920000  -0.61619876
  0.49920000   0.61619963
  0.49920000  -0.61619876
  0.49920000   0.61619963
  0.49920000  -0.61619876
  0.49920000   0.61619963
  0.49920000  -0.61619876
  0.49920000   0.61619963
  0.49920000  -0.61619877
  0.49920000   0.61619963
  0.49920000  -0.61619877
  0.49920000   0.61619963
  0.49920000  -0.61619877
  0.49920000   0.61619963
  0.49920000  -0.61619877
  0.49920000   0.61619962
  0.49920000  -0.61619877
  0.49920000   0.61619962
  0.49920000  -0.61619877
  0.49920000   0.61619962
  0.49920000  -0.61619877
  0.49920000   0.61619962
  0.49920000  -0.61619877
  0.49920000   0.61619962
  0.49920000  -0.61619877
  0.49920000   0.61619962
  0.49920000  -0.61619877
  0.49920000   0.61619962
  0.49920000  -0.61619877
  0.49920000   0.61619962
  0.49920000  -0.61619877
  0.49920000   0.61619962
  0.49920000  -0.61619878
  0.49920000   0.61619962
  0.50000000  -0.61595751
  0.50000000   0.61595838
  0.50000000  -0.61595751
  0.50000000   0.61595838
  0.50000000  -0.61595751
  0.50000000   0.61595838
  0.50000000  -0.61595751
  0.50000000   0.61595838
  0.50000000  -0.61595752
  0.50000000   0.61595838
  0.50000000  -0.61595752
  0.50000000   0.61595838
  0.50000000  -0.61595752
  0.50000000   0.61595838
  0.50000000  -0.61595752
  0.50000000   0.61595838
  0.50000000  -0.61595752
  0.50000000   0.61595838
  0.50000000  -0.61595752
  0.50000000   0.61595838
  0.50000000  -0.61595752
  0.50000000   0.61595837
  0.50000000  -0.61595752
  0.50000000   0.61595837
  0.50000000  -0.61595752
  0.50000000   0.61595837
  0.50000000  -0.61595752
  0.50000000   0.61595837
  0.50000000  -0.61595752
  0.50000000   0.61595837
  0.50000000  -0.61595753
  0.50000000   0.61595837
  0.50000000  -0.61595753
  0.50000000   0.61595837
  0.50000000  -0.61595753
  0.50000000   0.61595837
  0.50000000  -0.61595753
  0.50000000   0.61595837
  0.50000000  -0.61595753
  0.50000000   0.61595837
  0.50080000  -0.61571592
  0.50080000   0.61571678
  0.50080000  -0.61571592
  0.50080000   0.61571678
  0.50080000  -0.61571592
  0.50080000   0.61571678
  0.50080000  -0.61571592
  0.50080000   0.61571678
  0.50080000  -0.61571592
  0.50080000   0.61571678
  0.50080000  -0.61571592
  0.50080000   0.61571678
  0.50080000  -0.61571592
  0.50080000   0.61571678
  0.50080000  -0.61571592
  0.50080000   0.61571678
  0.50080000  -0.61571592
  0.50080000   0.61571678
  0.50080000  -0.61571592
  0.50080000   0.61571678
  0.50080000  -0.61571593
  0.50080000   0.61571678
  0.50080000  -0.61571593
  0.50080000   0.61571677
  0.50080000  -0.61571593
  0.50080000   0.61571677
  0.50080000  -0.61571593
  0.50080000   0.61571677
  0.50080000  -0.61571593
  0.50080000   0.61571677
  0.50080000  -0.61571593
  0.50080000   0.61571677
  0.50080000  -0.61571593
  0.50080000   0.61571677
  0.50080000  -0.61571593
  0.50080000   0.61571677
  0.50080000  -0.61571593
  0.50080000   0.61571677
  0.50080000  -0.61571593
  0.50080000   0.61571677
  0.50160000  -0.61547397
  0.50160000   0.61547484
  0.50160000  -0.61547397
  0.50160000   0.61547484
  0.50160000  -0.61547397
  0.50160000   0.61547483
  0.50160000  -0.61547397
  0.50160000   0.61547483
  0.50160000  -0.61547398
  0.50160000   0.61547483
  0.50160000  -0.61547398
  0.50160000   0.61547483
  0.50160000  -0.61547398
  0.50160000   0.61547483
  0.50160000  -0.61547398
  0.50160000   0.61547483
  0.50160000  -0.61547398
  0.50160000   0.61547483
  0.50160000  -0.61547398
  0.50160000   0.61547483
  0.50160000  -0.61547398
  0.50160000   0.61547483
  0.50160000  -0.61547398
  0.50160000   0.61547483
  0.50160000  -0.61547398
  0.50160000   0.61547483
  0.50160000  -0.61547398
  0.50160000   0.61547482
  0.50160000  -0.61547398
  0.50160000   0.61547482
  0.50160000  -0.61547399
  0.50160000   0.61547482
  0.50160000  -0.61547399
  0.50160000   0.61547482
  0.50160000  -0.61547399
  0.50160000   0.61547482
  0.50160000  -0.61547399
  0.50160000   0.61547482
  0.50160000  -0.61547399
  0.50160000   0.61547482
  0.50240000  -0.61523168
  0.50240000   0.61523254
  0.50240000  -0.61523168
  0.50240000   0.61523254
  0.50240000  -0.61523168
  0.50240000   0.61523254
  0.50240000  -0.61523168
  0.50240000   0.61523254
  0.50240000  -0.61523168
  0.50240000   0.61523253
  0.50240000  -0.61523168
  0.50240000   0.61523253
  0.50240000  -0.61523168
  0.50240000   0.61523253
  0.50240000  -0.61523168
  0.50240000   0.61523253
  0.50240000  -0.61523168
  0.50240000   0.61523253
  0.50240000  -0.61523169
  0.50240000   0.61523253
  0.50240000  -0.61523169
  0.50240000   0.61523253
  0.50240000  -0.61523169
  0.50240000   0.61523253
  0.50240000  -0.61523169
  0.50240000   0.61523253
  0.50240000  -0.61523169
  0.50240000   0.61523253
  0.50240000  -0.61523169
  0.50240000   0.61523253
  0.50240000  -0.61523169
  0.50240000   0.61523253
  0.50240000  -0.61523169
  0.50240000   0.61523252
  0.50240000  -0.61523169
  0.50240000   0.61523252
  0.50240000  -0.61523169
  0.50240000   0.61523252
  0.50240000  -0.61523169
  0.50240000   0.61523252
  0.50320000  -0.61498903
  0.50320000   0.61498989
  0.50320000  -0.61498903
  0.50320000   0.61498989
  0.50320000  -0.61498903
  0.50320000   0.61498989
  0.50320000  -0.61498904
  0.50320000   0.61498989
  0.50320000  -0.61498904
  0.50320000   0.61498989
  0.50320000  -0.61498904
  0.50320000   0.61498989
  0.50320000  -0.61498904
  0.50320000   0.61498988
  0.50320000  -0.61498904
  0.50320000   0.61498988
  0.50320000  -0.61498904
  0.50320000   0.61498988
  0.50320000  -0.61498904
  0.50320000   0.61498988
  0.50320000  -0.61498904
  0.50320000   0.61498988
  0.50320000  -0.61498904
  0.50320000   0.61498988
  0.50320000  -0.61498904
  0.50320000   0.61498988
  0.50320000  -0.61498904
  0.50320000   0.61498988
  0.50320000  -0.61498905
  0.50320000   0.61498988
  0.50320000  -0.61498905
  0.50320000   0.61498988
  0.50320000  -0.61498905
  0.50320000   0.61498988
  0.50320000  -0.61498905
  0.50320000   0.61498988
  0.50320000  -0.61498905
  0.50320000   0.61498987
  0.50320000  -0.61498905
  0.50320000   0.61498987
  0.50400000  -0.61474604
  0.50400000   0.61474689
  0.50400000  -0.61474604
  0.50400000   0.61474689
  0.50400000  -0.61474604
  0.50400000   0.61474689
  0.50400000  -0.61474604
  0.50400000   0.61474689
  0.50400000  -0.61474604
  0.50400000   0.61474689
  0.50400000  -0.61474604
  0.50400000   0.61474689
  0.50400000  -0.61474604
  0.50400000   0.61474688
  0.50400000  -0.61474604
  0.50400000   0.61474688
  0.50400000  -0.61474604
  0.50400000   0.61474688
  0.50400000  -0.61474604
  0.50400000   0.61474688
  0.50400000  -0.61474605
  0.50400000   0.61474688
  0.50400000  -0.61474605
  0.50400000   0.61474688
  0.50400000  -0.61474605
  0.50400000   0.61474688
  0.50400000  -0.61474605
  0.50400000   0.61474688
  0.50400000  -0.61474605
  0.50400000   0.61474688
  0.50400000  -0.61474605
  0.50400000   0.61474688
  0.50400000  -0.61474605
  0.50400000   0.61474688
  0.50400000  -0.61474605
  0.50400000   0.61474688
  0.50400000  -0.61474605
  0.50400000   0.61474687
  0.50400000  -0.61474605
  0.50400000   0.61474687
  0.50480000  -0.61450269
  0.50480000   0.61450354
  0.50480000  -0.61450269
  0.50480000   0.61450354
  0.50480000  -0.61450269
  0.50480000   0.61450354
  0.50480000  -0.61450269
  0.50480000   0.61450354
  0.50480000  -0.61450269
  0.50480000   0.61450353
  0.50480000  -0.61450269
  0.50480000   0.61450353
  0.50480000  -0.61450269
  0.50480000   0.61450353
  0.50480000  -0.61450269
  0.50480000   0.61450353
  0.50480000  -0.61450269
  0.50480000   0.61450353
  0.50480000  -0.61450270
  0.50480000   0.61450353
  0.50480000  -0.61450270
  0.50480000   0.61450353
  0.50480000  -0.61450270
  0.50480000   0.61450353
  0.50480000  -0.61450270
  0.50480000   0.61450353
  0.50480000  -0.61450270
  0.50480000   0.61450353
  0.50480000  -0.61450270
  0.50480000   0.61450353
  0.50480000  -0.61450270
  0.50480000   0.61450353
  0.50480000  -0.61450270
  0.50480000   0.61450352
  0.50480000  -0.61450270
  0.50480000   0.61450352
  0.50480000  -0.61450270
  0.50480000   0.61450352
  0.50480000  -0.61450270
  0.50480000   0.61450352
  0.50560000  -0.61425899
  0.50560000   0.61425983
  0.50560000  -0.61425899
  0.50560000   0.61425983
  0.50560000  -0.61425899
  0.50560000   0.61425983
  0.50560000  -0.61425899
  0.50560000   0.61425983
  0.50560000  -0.61425899
  0.50560000   0.61425983
  0.50560000  -0.61425899
  0.50560000   0.61425983
  0.50560000  -0.61425899
  0.50560000   0.61425983
  0.50560000  -0.61425899
  0.50560000   0.61425983
  0.50560000  -0.61425899
  0.50560000   0.61425983
  0.50560000  -0.61425899
  0.50560000   0.61425982
  0.50560000  -0.61425899
  0.50560000   0.61425982
  0.50560000  -0.61425900
  0.50560000   0.61425982
  0.50560000  -0.61425900
  0.50560000   0.61425982
  0.50560000  -0.61425900
  0.50560000   0.61425982
  0.50560000  -0.61425900
  0.50560000   0.61425982
  0.50560000  -0.61425900
  0.50560000   0.61425982
  0.50560000  -0.61425900
  0.50560000   0.61425982
  0.50560000  -0.61425900
  0.50560000   0.61425982
  0.50560000  -0.61425900
  0.50560000   0.61425982
  0.50560000  -0.61425900
  0.50560000   0.61425982
  0.50640000  -0.61401493
  0.50640000   0.61401577
  0.50640000  -0.61401493
  0.50640000   0.61401577
  0.50640000  -0.61401493
  0.50640000   0.61401577
  0.50640000  -0.61401493
  0.50640000   0.61401577
  0.50640000  -0.61401493
  0.50640000   0.61401577
  0.50640000  -0.61401493
  0.50640000   0.61401577
  0.50640000  -0.61401494
  0.50640000   0.61401577
  0.50640000  -0.61401494
  0.50640000   0.61401577
  0.50640000  -0.61401494
  0.50640000   0.61401577
  0.50640000  -0.61401494
  0.50640000   0.61401577
  0.50640000  -0.61401494
  0.50640000   0.61401576
  0.50640000  -0.61401494
  0.50640000   0.61401576
  0.50640000  -0.61401494
  0.50640000   0.61401576
  0.50640000  -0.61401494
  0.50640000   0.61401576
  0.50640000  -0.61401494
  0.50640000   0.61401576
  0.50640000  -0.61401494
  0.50640000   0.61401576
  0.50640000  -0.61401494
  0.50640000   0.61401576
  0.50640000  -0.61401494
  0.50640000   0.61401576
  0.50640000  -0.61401495
  0.50640000   0.61401576
  0.50640000  -0.61401495
  0.50640000   0.61401576
  0.50720000  -0.61377052
  0.50720000   0.61377136
  0.50720000  -0.61377052
  0.50720000   0.61377136
  0.50720000  -0.61377052
  0.50720000   0.61377136
  0.50720000  -0.61377052
  0.50720000   0.61377136
  0.50720000  -0.61377052
  0.50720000   0.61377136
  0.50720000  -0.61377052
  0.50720000   0.61377136
  0.50720000  -0.61377053
  0.50720000   0.61377135
  0.50720000  -0.61377053
  0.50720000   0.61377135
  0.50720000  -0.61377053
  0.50720000   0.61377135
  0.50720000  -0.61377053
  0.50720000   0.61377135
  0.50720000  -0.61377053
  0.50720000   0.61377135
  0.50720000  -0.61377053
  0.50720000   0.61377135
[truncated: 641,057 more chars]
