# Supplementary material for: A Fractional-Order Discrete Noninvertible Map of Cubic Type: Dynamics, Control, and Synchronization
Source: Hindawi journal article supplement (doi:10.1155/2020/2935192), 2020-05-22
Supplement: f1 [file 2935192.f1.zip › 2935192.f1/discretesanweiIN2q98b.dat]

  0.20000000   0.56801673
  0.20000000   0.50436919
  0.20000000   0.90860020
  0.20000000   0.85375951
  0.20000000   0.41046384
  0.20000000   0.57704272
  0.20000000   0.81910035
  0.20000000   0.89292231
  0.20000000   0.63500500
  0.20000000   0.48294486
  0.20000000   0.89506298
  0.20000000   0.84524071
  0.20000000   0.45333910
  0.20000000   0.60264710
  0.20000000   0.85948317
  0.20000000   0.88271707
  0.20000000   0.54309834
  0.20000000   0.51119142
  0.20000000   0.90503442
  0.20000000   0.85798366
  0.20000000   0.42055525
  0.20000000   0.56755291
  0.20000000   0.82922009
  0.20000000   0.89063158
  0.20000000   0.61347847
  0.20000000   0.48989153
  0.20000000   0.90318833
  0.20000000   0.84732180
  0.20000000   0.42849432
  0.20000000   0.59500602
  0.20000000   0.83742315
  0.20000000   0.88845967
  0.20000000   0.59544266
  0.20000000   0.49619094
  0.20000000   0.90726299
  0.20000000   0.84983514
  0.20000000   0.41545925
  0.20000000   0.58737709
  0.20000000   0.82445033
  0.20000000   0.89166200
  0.20080000   0.58923473
  0.20080000   0.49783205
  0.20080000   0.90833380
  0.20080000   0.85055301
  0.20080000   0.41216604
  0.20080000   0.58548072
  0.20080000   0.82132032
  0.20080000   0.89254983
  0.20080000   0.63051873
  0.20080000   0.48443159
  0.20080000   0.89736250
  0.20080000   0.84570926
  0.20080000   0.44660323
  0.20080000   0.60112230
  0.20080000   0.85415098
  0.20080000   0.88431256
  0.20080000   0.55633317
  0.20080000   0.50749979
  0.20080000   0.90776452
  0.20080000   0.85563468
  0.20080000   0.41282619
  0.20080000   0.57287198
  0.20080000   0.82177799
  0.20080000   0.89253453
  0.20080000   0.62948841
  0.20080000   0.48447087
  0.20080000   0.89776181
  0.20080000   0.84561231
  0.20080000   0.44542088
  0.20080000   0.60122939
  0.20080000   0.85313130
  0.20080000   0.88450768
  0.20080000   0.55882478
  0.20080000   0.50702973
  0.20080000   0.90809814
  0.20080000   0.85531767
  0.20080000   0.41186022
  0.20080000   0.57355577
  0.20080000   0.82078686
  0.20080000   0.89274059
  0.20160000   0.62950432
  0.20160000   0.48425066
  0.20160000   0.89802155
  0.20160000   0.84553005
  0.20160000   0.44484441
  0.20160000   0.60164045
  0.20160000   0.85292956
  0.20160000   0.88465302
  0.20160000   0.55943611
  0.20160000   0.50693287
  0.20160000   0.90846434
  0.20160000   0.85528548
  0.20160000   0.41090492
  0.20160000   0.57378244
  0.20160000   0.82008875
  0.20160000   0.89307745
  0.20160000   0.63311413
  0.20160000   0.48310599
  0.20160000   0.89645504
  0.20160000   0.84522806
  0.20160000   0.44957926
  0.20160000   0.60285143
  0.20160000   0.85696276
  0.20160000   0.88356596
  0.20160000   0.54959330
  0.20160000   0.50965496
  0.20160000   0.90698243
  0.20160000   0.85698307
  0.20160000   0.41512317
  0.20160000   0.56999129
  0.20160000   0.82437702
  0.20160000   0.89210638
  0.20160000   0.62408247
  0.20160000   0.48609062
  0.20160000   0.90018522
  0.20160000   0.84608776
  0.20160000   0.43822764
  0.20160000   0.59959709
  0.20160000   0.84707785
  0.20160000   0.88622604
  0.20240000   0.60722205
  0.20240000   0.49140878
  0.20240000   0.90568311
  0.20240000   0.84787996
  0.20240000   0.42127514
  0.20240000   0.59362163
  0.20240000   0.83126221
  0.20240000   0.89039565
  0.20240000   0.60945927
  0.20240000   0.49151550
  0.20240000   0.90520797
  0.20240000   0.84810522
  0.20240000   0.42270890
  0.20240000   0.59324885
  0.20240000   0.83268870
  0.20240000   0.89016846
  0.20240000   0.60629467
  0.20240000   0.49218176
  0.20240000   0.90597251
  0.20240000   0.84827916
  0.20240000   0.42032014
  0.20240000   0.59254905
  0.20240000   0.83031256
  0.20240000   0.89070537
  0.20240000   0.61152124
  0.20240000   0.49061349
  0.20240000   0.90463807
  0.20240000   0.84773787
  0.20240000   0.42453889
  0.20240000   0.59435680
  0.20240000   0.83449537
  0.20240000   0.88969034
  0.20240000   0.60230369
  0.20240000   0.49356446
  0.20240000   0.90686550
  0.20240000   0.84882577
  0.20240000   0.41744917
  0.20240000   0.59087749
  0.20240000   0.82740826
  0.20240000   0.89142663
  0.20320000   0.58126328
  0.20320000   0.50005165
  0.20320000   0.90978060
  0.20320000   0.85167180
  0.20320000   0.40794907
  0.20320000   0.58297803
  0.20320000   0.81773006
  0.20320000   0.89391585
  0.20320000   0.63821556
  0.20320000   0.48112950
  0.20320000   0.89460731
  0.20320000   0.84472186
  0.20320000   0.45553339
  0.20320000   0.60521442
  0.20320000   0.86244451
  0.20320000   0.88223366
  0.20320000   0.53619330
  0.20320000   0.51340998
  0.20320000   0.90446002
  0.20320000   0.85961493
  0.20320000   0.42264074
  0.20320000   0.56467679
  0.20320000   0.83239613
  0.20320000   0.89053643
  0.20320000   0.60689463
  0.20320000   0.49135784
  0.20320000   0.90603645
  0.20320000   0.84786872
  0.20320000   0.42037056
  0.20320000   0.59380746
  0.20320000   0.83065794
  0.20320000   0.89068484
  0.20320000   0.61088448
  0.20320000   0.49096622
  0.20320000   0.90510686
  0.20320000   0.84793166
  0.20320000   0.42323855
  0.20320000   0.59399802
  0.20320000   0.83351219
  0.20320000   0.89011435
  0.20400000   0.60631265
  0.20400000   0.49140317
  0.20400000   0.90645025
  0.20400000   0.84789517
  0.20400000   0.41926944
  0.20400000   0.59387684
  0.20400000   0.82985067
  0.20400000   0.89102682
  0.20400000   0.61274563
  0.20400000   0.49025807
  0.20400000   0.90486330
  0.20400000   0.84770197
  0.20400000   0.42421715
  0.20400000   0.59493526
  0.20400000   0.83477438
  0.20400000   0.88994348
  0.20400000   0.60187669
  0.20400000   0.49341876
  0.20400000   0.90750338
  0.20400000   0.84879373
  0.20400000   0.41584166
  0.20400000   0.59128835
  0.20400000   0.82636530
  0.20400000   0.89197860
  0.20400000   0.62024331
  0.20400000   0.48742736
  0.20400000   0.90245892
  0.20400000   0.84667590
  0.20400000   0.43178350
  0.20400000   0.59828717
  0.20400000   0.84204204
  0.20400000   0.88802097
  0.20400000   0.58544282
  0.20400000   0.49882443
  0.20400000   0.90981833
  0.20400000   0.85112688
  0.20400000   0.40813209
  0.20400000   0.58461142
  0.20400000   0.81824681
  0.20400000   0.89396334
  0.20480000   0.61683849
  0.20480000   0.48875542
  0.20480000   0.90389247
  0.20480000   0.84719815
  0.20480000   0.42748067
  0.20480000   0.59680004
  0.20480000   0.83824502
  0.20480000   0.88919241
  0.20480000   0.59419547
  0.20480000   0.49584358
  0.20480000   0.90911973
  0.20480000   0.84981318
  0.20480000   0.41077706
  0.20480000   0.58843520
  0.20480000   0.82138398
  0.20480000   0.89335762
  0.20480000   0.63085699
  0.20480000   0.48352138
  0.20480000   0.89857549
  0.20480000   0.84544230
  0.20480000   0.44395111
  0.20480000   0.60285423
  0.20480000   0.85334376
  0.20480000   0.88504554
  0.20480000   0.55889197
  0.20480000   0.50698339
  0.20480000   0.90955406
  0.20480000   0.85546257
  0.20480000   0.40817253
  0.20480000   0.57404133
  0.20480000   0.81839598
  0.20480000   0.89420860
  0.20480000   0.63696316
  0.20480000   0.48086381
  0.20480000   0.89571836
  0.20480000   0.84449976
  0.20480000   0.45265528
  0.20480000   0.60600939
  0.20480000   0.86069335
  0.20480000   0.88279426
  0.20560000   0.59045775
  0.20560000   0.49700171
  0.20560000   0.90989002
  0.20560000   0.85034410
  0.20560000   0.40843600
  0.20560000   0.58709876
  0.20560000   0.81919324
  0.20560000   0.89405867
  0.20560000   0.63549078
  0.20560000   0.48165353
  0.20560000   0.89674086
  0.20560000   0.84487597
  0.20560000   0.44973290
  0.20560000   0.60508924
  0.20560000   0.85857260
  0.20560000   0.88363005
  0.20560000   0.54622919
  0.20560000   0.51081118
  0.20560000   0.90778712
  0.20560000   0.85787659
  0.20560000   0.41329869
  0.20560000   0.56880756
  0.20560000   0.82394828
  0.20560000   0.89310502
  0.20560000   0.62543113
  0.20560000   0.48461042
  0.20560000   0.90100775
  0.20560000   0.84555762
  0.20560000   0.43677104
  0.20560000   0.60206860
  0.20560000   0.84724073
  0.20560000   0.88667190
  0.20560000   0.57361407
  0.20560000   0.50305804
  0.20560000   0.91082586
  0.20560000   0.85327384
  0.20560000   0.40485938
  0.20560000   0.57938146
  0.20560000   0.81524789
  0.20560000   0.89505466
  0.20640000   0.60095902
  0.20640000   0.49415538
  0.20640000   0.90857805
  0.20640000   0.84925576
  0.20640000   0.41294803
  0.20640000   0.59059015
  0.20640000   0.82426436
  0.20640000   0.89303747
  0.20640000   0.62497630
  0.20640000   0.48514632
  0.20640000   0.90152210
  0.20640000   0.84589570
  0.20640000   0.43534123
  0.20640000   0.60137372
  0.20640000   0.84623644
  0.20640000   0.88719310
  0.20640000   0.57605544
  0.20640000   0.50191864
  0.20640000   0.91109362
  0.20640000   0.85272552
  0.20640000   0.40431943
  0.20640000   0.58093995
  0.20640000   0.81498819
  0.20640000   0.89528944
  0.20640000   0.64413669
  0.20640000   0.47807654
  0.20640000   0.89259035
  0.20640000   0.84377973
  0.20640000   0.46239936
  0.20640000   0.60924438
  0.20640000   0.86899588
  0.20640000   0.88049323
  0.20640000   0.52003105
  0.20640000   0.51858321
  0.20640000   0.90028749
  0.20640000   0.86345097
  0.20640000   0.43511735
  0.20640000   0.55722480
  0.20640000   0.84523656
  0.20640000   0.88771829
  0.20720000   0.63488649
  0.20720000   0.48157618
  0.20720000   0.89756857
  0.20720000   0.84485491
  0.20720000   0.44763923
  0.20720000   0.60547129
  0.20720000   0.85739754
  0.20720000   0.88415479
  0.20720000   0.54937382
  0.20720000   0.51004498
  0.20720000   0.90899557
  0.20720000   0.85741193
  0.20720000   0.40999527
  0.20720000   0.57010666
  0.20720000   0.82112224
  0.20720000   0.89412584
  0.20720000   0.63154952
  0.20720000   0.48209155
  0.20720000   0.89900723
  0.20720000   0.84476614
  0.20720000   0.44333667
  0.20720000   0.60522421
  0.20720000   0.85368558
  0.20720000   0.88502767
  0.20720000   0.55847923
  0.20720000   0.50790500
  0.20720000   0.91042506
  0.20720000   0.85600062
  0.20720000   0.40585370
  0.20720000   0.57316897
  0.20720000   0.81678706
  0.20720000   0.89508640
  0.20720000   0.64052414
  0.20720000   0.47905393
  0.20720000   0.89474535
  0.20720000   0.84396580
  0.20720000   0.45620003
  0.20720000   0.60846832
  0.20720000   0.86444262
  0.20720000   0.88189457
  0.20800000   0.57152706
  0.20800000   0.50252558
  0.20800000   0.91152066
  0.20800000   0.85307940
  0.20800000   0.40321394
  0.20800000   0.58040718
  0.20800000   0.81435132
  0.20800000   0.89580905
  0.20800000   0.64556919
  0.20800000   0.47706077
  0.20800000   0.89231536
  0.20800000   0.84342741
  0.20800000   0.46363987
  0.20800000   0.61075403
  0.20800000   0.87051450
  0.20800000   0.88008026
  0.20800000   0.51637771
  0.20800000   0.52009059
  0.20800000   0.89943783
  0.20800000   0.86454171
  0.20800000   0.43774943
  0.20800000   0.55519866
  0.20800000   0.84815435
  0.20800000   0.88712203
  0.20800000   0.57152985
  0.20800000   0.50252452
  0.20800000   0.91152087
  0.20800000   0.85307900
  0.20800000   0.40321359
  0.20800000   0.58040826
  0.20800000   0.81435111
  0.20800000   0.89580926
  0.20800000   0.64556977
  0.20800000   0.47706030
  0.20800000   0.89231515
  0.20800000   0.84342734
  0.20800000   0.46364067
  0.20800000   0.61075440
  0.20800000   0.87051526
  0.20800000   0.88008018
  0.20880000   0.51703594
  0.20880000   0.52028810
  0.20880000   0.90002103
  0.20880000   0.86458655
  0.20880000   0.43615138
  0.20880000   0.55517511
  0.20880000   0.84699754
  0.20880000   0.88754761
  0.20880000   0.57436986
  0.20880000   0.50166751
  0.20880000   0.91185328
  0.20880000   0.85265325
  0.20880000   0.40244144
  0.20880000   0.58162791
  0.20880000   0.81382572
  0.20880000   0.89608932
  0.20880000   0.64672103
  0.20880000   0.47648491
  0.20880000   0.89193980
  0.20880000   0.84327532
  0.20880000   0.46495664
  0.20880000   0.61152124
  0.20880000   0.87179626
  0.20880000   0.87973825
  0.20880000   0.51317457
  0.20880000   0.52113098
  0.20880000   0.89838763
  0.20880000   0.86536943
  0.20880000   0.44086882
  0.20880000   0.55363611
  0.20880000   0.85118712
  0.20880000   0.88636306
  0.20880000   0.56442898
  0.20880000   0.50479306
  0.20880000   0.91144845
  0.20880000   0.85435203
  0.20880000   0.40332770
  0.20880000   0.57749183
  0.20880000   0.81471771
  0.20880000   0.89595893
  0.20960000   0.54205578
  0.20960000   0.51241497
  0.20960000   0.90833472
  0.20960000   0.85902383
  0.20960000   0.41219438
  0.20960000   0.56704337
  0.20960000   0.82423436
  0.20960000   0.89390848
  0.20960000   0.62525656
  0.20960000   0.48371132
  0.20960000   0.90241492
  0.20960000   0.84520263
  0.20960000   0.43349517
  0.20960000   0.60390317
  0.20960000   0.84570516
  0.20960000   0.88755961
  0.20960000   0.57780829
  0.20960000   0.50208555
  0.20960000   0.91227008
  0.20960000   0.85291755
  0.20960000   0.40128533
  0.20960000   0.58109923
  0.20960000   0.81286632
  0.20960000   0.89650115
  0.20960000   0.64873760
  0.20960000   0.47549403
  0.20960000   0.89105020
  0.20960000   0.84298573
  0.20960000   0.46780548
  0.20960000   0.61276443
  0.20960000   0.87419665
  0.20960000   0.87899531
  0.20960000   0.50702662
  0.20960000   0.52308062
  0.20960000   0.89591551
  0.20960000   0.86693334
  0.20960000   0.44802689
  0.20960000   0.55054666
  0.20960000   0.85757171
  0.20960000   0.88451483
  0.21040000   0.51993291
  0.21040000   0.51956441
  0.21040000   0.90176498
  0.21040000   0.86406245
  0.21040000   0.43134391
  0.21040000   0.55654744
  0.21040000   0.84318769
  0.21040000   0.88895828
  0.21040000   0.58343961
  0.21040000   0.49838195
  0.21040000   0.91213513
  0.21040000   0.85106161
  0.21040000   0.40227268
  0.21040000   0.58607306
  0.21040000   0.81430046
  0.21040000   0.89624159
  0.21040000   0.64597592
  0.21040000   0.47664593
  0.21040000   0.89292022
  0.21040000   0.84338900
  0.21040000   0.46243914
  0.21040000   0.61156822
  0.21040000   0.87048472
  0.21040000   0.88035886
  0.21040000   0.51684053
  0.21040000   0.52021554
  0.21040000   0.90051984
  0.21040000   0.86466852
  0.21040000   0.43496191
  0.21040000   0.55536745
  0.21040000   0.84650742
  0.21040000   0.88804613
  0.21040000   0.57570902
  0.21040000   0.50085750
  0.21040000   0.91240212
  0.21040000   0.85229037
  0.21040000   0.40114939
  0.21040000   0.58287724
  0.21040000   0.81302284
  0.21040000   0.89661775
  0.21120000   0.52893680
  0.21120000   0.51771706
  0.21120000   0.90531382
  0.21120000   0.86242387
  0.21120000   0.42107213
  0.21120000   0.55988222
  0.21120000   0.83365868
  0.21120000   0.89163588
  0.21120000   0.60508708
  0.21120000   0.49109541
  0.21120000   0.90924900
  0.21120000   0.84794253
  0.21120000   0.41220636
  0.21120000   0.59525833
  0.21120000   0.82529058
  0.21120000   0.89351520
  0.21120000   0.62341859
  0.21120000   0.48552449
  0.21120000   0.90380711
  0.21120000   0.84621128
  0.21120000   0.42941770
  0.21120000   0.60154742
  0.21120000   0.84247479
  0.21120000   0.88905443
  0.21120000   0.58541632
  0.21120000   0.49850740
  0.21120000   0.91238538
  0.21120000   0.85121513
  0.21120000   0.40166120
  0.21120000   0.58588946
  0.21120000   0.81394116
  0.21120000   0.89654010
  0.21120000   0.64678281
  0.21120000   0.47603078
  0.21120000   0.89272666
  0.21120000   0.84316403
  0.21120000   0.46324581
  0.21120000   0.61246528
  0.21120000   0.87139088
  0.21120000   0.88007018
  0.21200000   0.55575628
  0.21200000   0.50895175
  0.21200000   0.91182735
  0.21200000   0.85676136
  0.21200000   0.40232348
  0.21200000   0.57233554
  0.21200000   0.81472124
  0.21200000   0.89667195
  0.21200000   0.64520539
  0.21200000   0.47595547
  0.21200000   0.89382094
  0.21200000   0.84292583
  0.21200000   0.46025942
  0.21200000   0.61301371
  0.21200000   0.86938375
  0.21200000   0.88057050
  0.21200000   0.52003079
  0.21200000   0.52040514
  0.21200000   0.90243735
  0.21200000   0.86445808
  0.21200000   0.42954316
  0.21200000   0.55584042
  0.21200000   0.84205473
  0.21200000   0.88945482
  0.21200000   0.58627507
  0.21200000   0.49758116
  0.21200000   0.91250668
  0.21200000   0.85074019
  0.21200000   0.40153266
  0.21200000   0.58728407
  0.21200000   0.81409734
  0.21200000   0.89661991
  0.21200000   0.64656053
  0.21200000   0.47608399
  0.21200000   0.89312664
  0.21200000   0.84321664
  0.21200000   0.46224259
  0.21200000   0.61251660
  0.21200000   0.87091751
  0.21200000   0.88032526
  0.21280000   0.62852476
  0.21280000   0.48174529
  0.21280000   0.90216326
  0.21280000   0.84450460
  0.21280000   0.43514740
  0.21280000   0.60684187
  0.21280000   0.84840454
  0.21280000   0.88708848
  0.21280000   0.57196687
  0.21280000   0.50448946
  0.21280000   0.91346267
  0.21280000   0.85422433
  0.21280000   0.39792603
  0.21280000   0.57841175
  0.21280000   0.81028693
  0.21280000   0.89783603
  0.21280000   0.65416850
  0.21280000   0.47246592
  0.21280000   0.88879258
  0.21280000   0.84204458
  0.21280000   0.47529327
  0.21280000   0.61681046
  0.21280000   0.88064947
  0.21280000   0.87685745
  0.21280000   0.49041288
  0.21280000   0.52890599
  0.21280000   0.88841846
  0.21280000   0.87161117
  0.21280000   0.46943736
  0.21280000   0.54127587
  0.21280000   0.87515743
  0.21280000   0.87877431
  0.21280000   0.50480391
  0.21280000   0.52457560
  0.21280000   0.89599031
  0.21280000   0.86792603
  0.21280000   0.44816922
  0.21280000   0.54899301
  0.21280000   0.85878750
  0.21280000   0.88456282
  0.21360000   0.52294477
  0.21360000   0.52045429
  0.21360000   0.90416674
  0.21360000   0.86422399
  0.21360000   0.42465704
  0.21360000   0.55640889
  0.21360000   0.83796031
  0.21360000   0.89079048
  0.21360000   0.59580304
  0.21360000   0.49439985
  0.21360000   0.91191623
  0.21360000   0.84937716
  0.21360000   0.40406279
  0.21360000   0.59148239
  0.21360000   0.81748989
  0.21360000   0.89604895
  0.21360000   0.63989117
  0.21360000   0.47856746
  0.21360000   0.89728107
  0.21360000   0.84397841
  0.21360000   0.45015825
  0.21360000   0.61002232
  0.21360000   0.86185713
  0.21360000   0.88345180
  0.21360000   0.53931840
  0.21360000   0.51394113
  0.21360000   0.90916133
  0.21360000   0.86003683
  0.21360000   0.41024065
  0.21360000   0.56549967
  0.21360000   0.82362767
  0.21360000   0.89488681
  0.21360000   0.62697185
  0.21360000   0.48225945
  0.21360000   0.90308069
  0.21360000   0.84468978
  0.21360000   0.43249960
  0.21360000   0.60636330
  0.21360000   0.84624882
  0.21360000   0.88784710
  0.21440000   0.50418280
  0.21440000   0.52605216
  0.21440000   0.89642094
  0.21440000   0.86867695
  0.21440000   0.44708090
  0.21440000   0.54745463
  0.21440000   0.85841568
  0.21440000   0.88467491
  0.21440000   0.54773383
  0.21440000   0.51104887
  0.21440000   0.91126009
  0.21440000   0.85816918
  0.21440000   0.40424738
  0.21440000   0.56974586
  0.21440000   0.81761607
  0.21440000   0.89657601
  0.21440000   0.63952130
  0.21440000   0.47725953
  0.21440000   0.89759904
  0.21440000   0.84310905
  0.21440000   0.44956361
  0.21440000   0.61229961
  0.21440000   0.86162780
  0.21440000   0.88309949
  0.21440000   0.54014884
  0.21440000   0.51526771
  0.21440000   0.90975893
  0.21440000   0.86055948
  0.21440000   0.40842422
  0.21440000   0.56418220
  0.21440000   0.82196627
  0.21440000   0.89528410
  0.21440000   0.63058768
  0.21440000   0.48130656
  0.21440000   0.90187524
  0.21440000   0.84454998
  0.21440000   0.43638077
  0.21440000   0.60740957
  0.21440000   0.85012080
  0.21440000   0.88693382
  0.21520000   0.49976559
  0.21520000   0.52873134
  0.21520000   0.89446217
  0.21520000   0.87021711
  0.21520000   0.45259239
  0.21520000   0.54415244
  0.21520000   0.86314375
  0.21520000   0.88290837
  0.21520000   0.53614858
  0.21520000   0.51577719
  0.21520000   0.90886869
  0.21520000   0.86107104
  0.21520000   0.41118623
  0.21520000   0.56343636
  0.21520000   0.82511978
  0.21520000   0.89474566
  0.21520000   0.62398351
  0.21520000   0.48328533
  0.21520000   0.90479841
  0.21520000   0.84505881
  0.21520000   0.42751624
  0.21520000   0.60541494
  0.21520000   0.84210947
  0.21520000   0.88930375
  0.21520000   0.58690829
  0.21520000   0.49927967
  0.21520000   0.91378252
  0.21520000   0.85175708
  0.21520000   0.39800865
  0.21520000   0.58533596
  0.21520000   0.81137127
  0.21520000   0.89808333
  0.21520000   0.65229224
  0.21520000   0.47267149
  0.21520000   0.89075987
  0.21520000   0.84205309
  0.21520000   0.47015232
  0.21520000   0.61715845
  0.21520000   0.87791429
  0.21520000   0.87789803
  0.21600000   0.39675479
  0.21600000   0.58639738
  0.21600000   0.81026255
  0.21600000   0.89842762
  0.21600000   0.65458106
  0.21600000   0.47183360
  0.21600000   0.88961120
  0.21600000   0.84191735
  0.21600000   0.47369857
  0.21600000   0.61808864
  0.21600000   0.88070407
  0.21600000   0.87704440
  0.21600000   0.49082444
  0.21600000   0.52956216
  0.21600000   0.88986718
  0.21600000   0.87198734
  0.21600000   0.46579282
  0.21600000   0.54102957
  0.21600000   0.87365307
  0.21600000   0.87969409
  0.21600000   0.50925682
  0.21600000   0.52348134
  0.21600000   0.89926899
  0.21600000   0.86709830
  0.21600000   0.43923976
  0.21600000   0.55130196
  0.21600000   0.85228326
  0.21600000   0.88722565
  0.21600000   0.56273856
  0.21600000   0.50490916
  0.21600000   0.91386560
  0.21600000   0.85465659
  0.21600000   0.39719315
  0.21600000   0.57821085
  0.21600000   0.81062015
  0.21600000   0.89858743
  0.21600000   0.65376902
  0.21600000   0.47136749
  0.21600000   0.89003901
  0.21600000   0.84145219
  0.21680000   0.48141431
  0.21680000   0.53337674
  0.21680000   0.88452940
  0.21680000   0.87483136
  0.21680000   0.48052636
  0.21680000   0.53494676
  0.21680000   0.88395887
  0.21680000   0.87541445
  0.21680000   0.48195415
  0.21680000   0.53345320
  0.21680000   0.88479307
  0.21680000   0.87470723
  0.21680000   0.47975454
  0.21680000   0.53518354
  0.21680000   0.88343584
  0.21680000   0.87559947
  0.21680000   0.48336265
  0.21680000   0.53305317
  0.21680000   0.88566327
  0.21680000   0.87433312
  0.21680000   0.47736512
  0.21680000   0.53598353
  0.21680000   0.88187547
  0.21680000   0.87624834
  0.21680000   0.48758012
  0.21680000   0.53162505
  0.21680000   0.88821761
  0.21680000   0.87317450
  0.21680000   0.47034494
  0.21680000   0.53848654
  0.21680000   0.87711458
  0.21680000   0.87822233
  0.21680000   0.50029685
  0.21680000   0.52718714
  0.21680000   0.89524548
  0.21680000   0.86970952
  0.21680000   0.45072214
  0.21680000   0.54586170
  0.21680000   0.86226042
  0.21680000   0.88385468
  0.21760000   0.50999268
  0.21760000   0.52381970
  0.21760000   0.90029920
  0.21760000   0.86725159
  0.21760000   0.43648046
  0.21760000   0.55115417
  0.21760000   0.85040140
  0.21760000   0.88800529
  0.21760000   0.56747497
  0.21760000   0.50341730
  0.21760000   0.91479097
  0.21760000   0.85385363
  0.21760000   0.39480642
  0.21760000   0.58041619
  0.21760000   0.80857393
  0.21760000   0.89938315
  0.21760000   0.65796652
  0.21760000   0.46938856
  0.21760000   0.88786432
  0.21760000   0.84092783
  0.21760000   0.47932449
  0.21760000   0.62150233
  0.21760000   0.88506713
  0.21760000   0.87510414
  0.21760000   0.47936056
  0.21760000   0.53448945
  0.21760000   0.88353286
  0.21760000   0.87558771
  0.21760000   0.48330669
  0.21760000   0.53340196
  0.21760000   0.88597023
  0.21760000   0.87453144
  0.21760000   0.47662105
  0.21760000   0.53567476
  0.21760000   0.88166632
  0.21760000   0.87637011
  0.21760000   0.48830056
  0.21760000   0.53164384
  0.21760000   0.88895903
  0.21760000   0.87312371
  0.21840000   0.46650279
  0.21840000   0.53970181
  0.21840000   0.87496156
  0.21840000   0.87941518
  0.21840000   0.50618257
  0.21840000   0.52488134
  0.21840000   0.89871608
  0.21840000   0.86813476
  0.21840000   0.44110783
  0.21840000   0.54955807
  0.21840000   0.85475027
  0.21840000   0.88680145
  0.21840000   0.55710960
  0.21840000   0.50680465
  0.21840000   0.91412017
  0.21840000   0.85581921
  0.21840000   0.39662280
  0.21840000   0.57595785
  0.21840000   0.81081803
  0.21840000   0.89914880
  0.21840000   0.65357194
  0.21840000   0.47054467
  0.21840000   0.89091270
  0.21840000   0.84101513
  0.21840000   0.47066091
  0.21840000   0.62077040
  0.21840000   0.87939212
  0.21840000   0.87698106
  0.21840000   0.49495022
  0.21840000   0.53091911
  0.21840000   0.89319932
  0.21840000   0.87192114
  0.21840000   0.45657532
  0.21840000   0.54111873
  0.21840000   0.86743889
  0.21840000   0.88175153
  0.21840000   0.52580094
  0.21840000   0.51965028
  0.21840000   0.90686323
  0.21840000   0.86375100
  0.21920000   0.60380723
  0.21920000   0.49316205
  0.21920000   0.91256476
  0.21920000   0.84930393
  0.21920000   0.40333396
  0.21920000   0.59338293
  0.21920000   0.81880013
  0.21920000   0.89703789
  0.21920000   0.63777139
  0.21920000   0.47773167
  0.21920000   0.90018845
  0.21920000   0.84346078
  0.21920000   0.44285610
  0.21920000   0.61238239
  0.21920000   0.85765964
  0.21920000   0.88504404
  0.21920000   0.55066513
  0.21920000   0.51199694
  0.21920000   0.91373776
  0.21920000   0.85858553
  0.21920000   0.39741531
  0.21920000   0.56933726
  0.21920000   0.81189134
  0.21920000   0.89891201
  0.21920000   0.65157873
  0.21920000   0.47163646
  0.21920000   0.89246940
  0.21920000   0.84149755
  0.21920000   0.46621444
  0.21920000   0.61949258
  0.21920000   0.87647839
  0.21920000   0.87830942
  0.21920000   0.50280288
  0.21920000   0.52814373
  0.21920000   0.89759255
  0.21920000   0.86986447
  0.21920000   0.44427046
  0.21920000   0.54561568
  0.21920000   0.85769686
  0.21920000   0.88544056
  0.22000000   0.44460038
  0.22000000   0.61579170
  0.22000000   0.85942345
  0.22000000   0.88385272
  0.22000000   0.54664089
  0.22000000   0.51549791
  0.22000000   0.91340953
  0.22000000   0.86034899
  0.22000000   0.39819733
  0.22000000   0.56517422
  0.22000000   0.81294728
  0.22000000   0.89857760
  0.22000000   0.64961197
  0.22000000   0.47299378
  0.22000000   0.89398314
  0.22000000   0.84214372
  0.22000000   0.46181031
  0.22000000   0.61779793
  0.22000000   0.87346995
  0.22000000   0.87975579
  0.22000000   0.51076590
  0.22000000   0.52497858
  0.22000000   0.90160408
  0.22000000   0.86767948
  0.22000000   0.43292292
  0.22000000   0.55041499
  0.22000000   0.84798401
  0.22000000   0.88894875
  0.22000000   0.57354649
  0.22000000   0.50174407
  0.22000000   0.91586529
  0.22000000   0.85298724
  0.22000000   0.39212014
  0.22000000   0.58296971
  0.22000000   0.80644815
  0.22000000   0.90035576
  0.22000000   0.66234650
  0.22000000   0.46712371
  0.22000000   0.88566584
  0.22000000   0.84031757
  0.22080000   0.46003836
  0.22080000   0.61959986
  0.22080000   0.87237297
  0.22080000   0.87964608
  0.22080000   0.51392169
  0.22080000   0.52579388
  0.22080000   0.90338050
  0.22080000   0.86758840
  0.22080000   0.42771954
  0.22080000   0.55030964
  0.22080000   0.84336349
  0.22080000   0.89017081
  0.22080000   0.58447521
  0.22080000   0.49872414
  0.22080000   0.91584808
  0.22080000   0.85152008
  0.22080000   0.39270987
  0.22080000   0.58695700
  0.22080000   0.80747471
  0.22080000   0.90018780
  0.22080000   0.66048441
  0.22080000   0.46801496
  0.22080000   0.88725854
  0.22080000   0.84066733
  0.22080000   0.48188056
  0.22080000   0.62348039
  0.22080000   0.88788781
  0.22080000   0.87423751
  0.22080000   0.47216273
  0.22080000   0.53732821
  0.22080000   0.87993520
  0.22080000   0.87798438
  0.22080000   0.49338509
  0.22080000   0.52878675
  0.22080000   0.89301338
  0.22080000   0.87159191
  0.22080000   0.45764242
  0.22080000   0.54292620
  0.22080000   0.86923803
  0.22080000   0.88222564
  0.22160000   0.43389596
  0.22160000   0.55292935
  0.22160000   0.84955471
  0.22160000   0.88940130
  0.22160000   0.56985755
  0.22160000   0.50092494
  0.22160000   0.91620510
  0.22160000   0.85263944
  0.22160000   0.39145656
  0.22160000   0.58423877
  0.22160000   0.80629090
  0.22160000   0.90075650
  0.22160000   0.66279429
  0.22160000   0.46646202
  0.22160000   0.88586050
  0.22160000   0.84005301
  0.22160000   0.48619646
  0.22160000   0.62558291
  0.22160000   0.89087373
  0.22160000   0.87280182
  0.22160000   0.46407315
  0.22160000   0.54072600
  0.22160000   0.87449279
  0.22160000   0.88052601
  0.22160000   0.50784407
  0.22160000   0.52310841
  0.22160000   0.90063649
  0.22160000   0.86744301
  0.22160000   0.43619072
  0.22160000   0.55193736
  0.22160000   0.85162626
  0.22160000   0.88872794
  0.22160000   0.56494516
  0.22160000   0.50272772
  0.22160000   0.91595992
  0.22160000   0.85364803
  0.22160000   0.39199764
  0.22160000   0.58179657
  0.22160000   0.80687518
  0.22160000   0.90072918
  0.22240000   0.66687657
  0.22240000   0.46462131
  0.22240000   0.88316473
  0.22240000   0.83958731
  0.22240000   0.49414103
  0.22240000   0.62762946
  0.22240000   0.89586504
  0.22240000   0.87077283
  0.22240000   0.45012985
  0.22240000   0.54503656
  0.22240000   0.86392036
  0.22240000   0.88450169
  0.22240000   0.53509062
  0.22240000   0.51390259
  0.22240000   0.91109073
  0.22240000   0.86062370
  0.22240000   0.40590393
  0.22240000   0.56625231
  0.22240000   0.82228144
  0.22240000   0.89741472
  0.22240000   0.63061098
  0.22240000   0.47789479
  0.22240000   0.90439473
  0.22240000   0.84274727
  0.22240000   0.43095017
  0.22240000   0.61377081
  0.22240000   0.84798685
  0.22240000   0.88765374
  0.22240000   0.57455020
  0.22240000   0.50648755
  0.22240000   0.91716650
  0.22240000   0.85537323
  0.22240000   0.38796692
  0.22240000   0.57718505
  0.22240000   0.80246980
  0.22240000   0.90183000
  0.22240000   0.67015319
  0.22240000   0.46311613
  0.22240000   0.88067716
  0.22240000   0.83915362
  0.22320000   0.38686388
  0.22320000   0.57609594
  0.22320000   0.80145558
  0.22320000   0.90221726
  0.22320000   0.67213579
  0.22320000   0.46210764
  0.22320000   0.87938839
  0.22320000   0.83888708
  0.22320000   0.50506702
  0.22320000   0.63040745
  0.22320000   0.90196386
  0.22320000   0.86805712
  0.22320000   0.43273224
  0.22320000   0.55059888
  0.22320000   0.84908975
  0.22320000   0.88951508
  0.22320000   0.57130649
  0.22320000   0.50126836
  0.22320000   0.91691880
  0.22320000   0.85284340
  0.22320000   0.38950786
  0.22320000   0.58397706
  0.22320000   0.80465225
  0.22320000   0.90151993
  0.22320000   0.66609133
  0.22320000   0.46456749
  0.22320000   0.88399634
  0.22320000   0.83946350
  0.22320000   0.49201252
  0.22320000   0.62803569
  0.22320000   0.89492226
  0.22320000   0.87102259
  0.22320000   0.45301532
  0.22320000   0.54495165
  0.22320000   0.86659598
  0.22320000   0.88396490
  0.22320000   0.52837340
  0.22320000   0.51534781
  0.22320000   0.90928952
  0.22320000   0.86191730
  0.22400000   0.59930758
  0.22400000   0.49285404
  0.22400000   0.91506030
  0.22400000   0.84898705
  0.22400000   0.39658018
  0.22400000   0.59477411
  0.22400000   0.81312380
  0.22400000   0.89923727
  0.22400000   0.64980961
  0.22400000   0.47250639
  0.22400000   0.89526598
  0.22400000   0.84211097
  0.22400000   0.45898765
  0.22400000   0.61898701
  0.22400000   0.87274713
  0.22400000   0.88036445
  0.22400000   0.51332002
  0.22400000   0.52491113
  0.22400000   0.90423364
  0.22400000   0.86748444
  0.22400000   0.42579084
  0.22400000   0.55141328
  0.22400000   0.84272869
  0.22400000   0.89126397
  0.22400000   0.58623106
  0.22400000   0.49675609
  0.22400000   0.91675204
  0.22400000   0.85057609
  0.22400000   0.39075510
  0.22400000   0.59002213
  0.22400000   0.80644916
  0.22400000   0.90100420
  0.22400000   0.66281356
  0.22400000   0.46658817
  0.22400000   0.88670996
  0.22400000   0.84033800
  0.22400000   0.48428089
  0.22400000   0.62560380
  0.22400000   0.89055884
  0.22400000   0.87329358
  0.22480000   0.59471141
  0.22480000   0.50029511
  0.22480000   0.91658469
  0.22480000   0.85274673
  0.22480000   0.39100720
  0.22480000   0.58495660
  0.22480000   0.80700428
  0.22480000   0.90147153
  0.22480000   0.66168593
  0.22480000   0.46551713
  0.22480000   0.88763375
  0.22480000   0.83941467
  0.22480000   0.48202865
  0.22480000   0.62785962
  0.22480000   0.88936520
  0.22480000   0.87293663
  0.22480000   0.46905035
  0.22480000   0.54197333
  0.22480000   0.87940936
  0.22480000   0.88014000
  0.22480000   0.49503556
  0.22480000   0.52436553
  0.22480000   0.89517004
  0.22480000   0.87002053
  0.22480000   0.45249115
  0.22480000   0.54798002
  0.22480000   0.86677794
  0.22480000   0.88483636
  0.22480000   0.52788278
  0.22480000   0.51339126
  0.22480000   0.90953939
  0.22480000   0.86116383
  0.22480000   0.41109655
  0.22480000   0.56630196
  0.22480000   0.82866186
  0.22480000   0.89665226
  0.22480000   0.61720877
  0.22480000   0.48124915
  0.22480000   0.91022649
  0.22480000   0.84346352
  0.22560000   0.43967231
  0.22560000   0.55004040
  0.22560000   0.85617340
  0.22560000   0.88811673
  0.22560000   0.55446042
  0.22560000   0.50559784
  0.22560000   0.91622870
  0.22560000   0.85552128
  0.22560000   0.39155528
  0.22560000   0.57828484
  0.22560000   0.80778887
  0.22560000   0.90165810
  0.22560000   0.66012814
  0.22560000   0.46528338
  0.22560000   0.88888401
  0.22560000   0.83899119
  0.22560000   0.47869548
  0.22560000   0.62882078
  0.22560000   0.88743733
  0.22560000   0.87324117
  0.22560000   0.47466818
  0.22560000   0.54196131
  0.22560000   0.88366950
  0.22560000   0.87910149
  0.22560000   0.48353367
  0.22560000   0.52656487
  0.22560000   0.88868002
  0.22560000   0.87283104
  0.22560000   0.47084338
  0.22560000   0.54255891
  0.22560000   0.88091245
  0.22560000   0.87993190
  0.22560000   0.49098985
  0.22560000   0.52485811
  0.22560000   0.89312259
  0.22560000   0.87089687
  0.22560000   0.45841899
  0.22560000   0.54651396
  0.22560000   0.87175747
  0.22560000   0.88334738
  0.22640000   0.43264755
  0.22640000   0.60901504
  0.22640000   0.85111445
  0.22640000   0.88899798
  0.22640000   0.56720911
  0.22640000   0.50389972
  0.22640000   0.91804682
  0.22640000   0.85428557
  0.22640000   0.38626470
  0.22640000   0.58091695
  0.22640000   0.80202421
  0.22640000   0.90297579
  0.22640000   0.67131386
  0.22640000   0.46099370
  0.22640000   0.88100533
  0.22640000   0.83816924
  0.22640000   0.50148169
  0.22640000   0.63296990
  0.22640000   0.90123116
  0.22640000   0.86772234
  0.22640000   0.43569790
  0.22640000   0.55291857
  0.22640000   0.85310336
  0.22640000   0.88969785
  0.22640000   0.56192144
  0.22640000   0.50164636
  0.22640000   0.91732857
  0.22640000   0.85330149
  0.22640000   0.38878001
  0.22640000   0.58372789
  0.22640000   0.80498794
  0.22640000   0.90232294
  0.22640000   0.66568205
  0.22640000   0.46329293
  0.22640000   0.88526739
  0.22640000   0.83870390
  0.22640000   0.48933094
  0.22640000   0.63073091
  0.22640000   0.89443988
  0.22640000   0.87063363
  0.22720000   0.38758376
  0.22720000   0.57036208
  0.22720000   0.80364558
  0.22720000   0.90266635
  0.22720000   0.66830727
  0.22720000   0.46236849
  0.22720000   0.88359344
  0.22720000   0.83861399
  0.22720000   0.49427973
  0.22720000   0.63163472
  0.22720000   0.89760370
  0.22720000   0.86946493
  0.22720000   0.44627772
  0.22720000   0.54975962
  0.22720000   0.86263584
  0.22720000   0.88685553
  0.22720000   0.53864478
  0.22720000   0.50913654
  0.22720000   0.91354427
  0.22720000   0.85831416
  0.22720000   0.39976183
  0.22720000   0.57287235
  0.22720000   0.81752546
  0.22720000   0.90003182
  0.22720000   0.64078779
  0.22720000   0.47153750
  0.22720000   0.90097786
  0.22720000   0.84015174
  0.22720000   0.44306646
  0.22720000   0.62295922
  0.22720000   0.86063049
  0.22720000   0.88283324
  0.22720000   0.54517267
  0.22720000   0.52097488
  0.22720000   0.91605195
  0.22720000   0.86277783
  0.22720000   0.39072798
  0.22720000   0.56012992
  0.22720000   0.80700943
  0.22720000   0.90105347
  0.22800000   0.67212477
  0.22800000   0.46028566
  0.22800000   0.88087249
  0.22800000   0.83793657
  0.22800000   0.50227344
  0.22800000   0.63413914
  0.22800000   0.90218791
  0.22800000   0.86717620
  0.22800000   0.43326465
  0.22800000   0.55460780
  0.22800000   0.85150940
  0.22800000   0.89072926
  0.22800000   0.56585239
  0.22800000   0.49936628
  0.22800000   0.91812952
  0.22800000   0.85203864
  0.22800000   0.38686348
  0.22800000   0.58709106
  0.22800000   0.80338504
  0.22800000   0.90288135
  0.22800000   0.66893394
  0.22800000   0.46198874
  0.22800000   0.88339835
  0.22800000   0.83853692
  0.22800000   0.49504833
  0.22800000   0.63217069
  0.22800000   0.89832474
  0.22800000   0.86916439
  0.22800000   0.44437235
  0.22800000   0.55062336
  0.22800000   0.86132866
  0.22800000   0.88753380
  0.22800000   0.54197774
  0.22800000   0.50765353
  0.22800000   0.91462298
  0.22800000   0.85737081
  0.22800000   0.39675141
  0.22800000   0.57510959
  0.22800000   0.81452037
  0.22800000   0.90092571
  0.22880000   0.67584271
  0.22880000   0.45857691
  0.22880000   0.87815485
  0.22880000   0.83754241
  0.22880000   0.51012842
  0.22880000   0.63594273
  0.22880000   0.90632765
  0.22880000   0.86526545
  0.22880000   0.42129184
  0.22880000   0.55843922
  0.22880000   0.84044455
  0.22880000   0.89416744
  0.22880000   0.59168628
  0.22880000   0.49013594
  0.22880000   0.91752719
  0.22880000   0.84717517
  0.22880000   0.39018213
  0.22880000   0.59979058
  0.22880000   0.80762328
  0.22880000   0.90086885
  0.22880000   0.66130638
  0.22880000   0.46881838
  0.22880000   0.88962228
  0.22880000   0.84197315
  0.22880000   0.47666758
  0.22880000   0.62274943
  0.22880000   0.88739070
  0.22880000   0.87601832
  0.22880000   0.47466621
  0.22880000   0.53550379
  0.22880000   0.88453223
  0.22880000   0.87761042
  0.22880000   0.48209144
  0.22880000   0.53169639
  0.22880000   0.88921340
  0.22880000   0.87499951
  0.22880000   0.46936117
  0.22880000   0.53763713
  0.22880000   0.88079677
  0.22880000   0.87920885
  0.22960000   0.56504272
  0.22960000   0.51030931
  0.22960000   0.91940145
  0.22960000   0.85732093
  0.22960000   0.38180005
  0.22960000   0.57356104
  0.22960000   0.79776063
  0.22960000   0.90455906
  0.22960000   0.67950095
  0.22960000   0.45674502
  0.22960000   0.87530941
  0.22960000   0.83702173
  0.22960000   0.51824381
  0.22960000   0.63798910
  0.22960000   0.91014131
  0.22960000   0.86326659
  0.22960000   0.41014380
  0.22960000   0.56246503
  0.22960000   0.82946264
  0.22960000   0.89736969
  0.22960000   0.61606478
  0.22960000   0.48093789
  0.22960000   0.91227261
  0.22960000   0.84331059
  0.22960000   0.40802298
  0.22960000   0.61187321
  0.22960000   0.82765840
  0.22960000   0.89443839
  0.22960000   0.62108697
  0.22960000   0.48962316
  0.22960000   0.91151216
  0.22960000   0.84905818
  0.22960000   0.40908888
  0.22960000   0.59812742
  0.22960000   0.82885732
  0.22960000   0.89692899
  0.22960000   0.61763291
  0.22960000   0.48226470
  0.22960000   0.91194508
  0.22960000   0.84429877
  0.23040000   0.44399193
  0.23040000   0.55390855
  0.23040000   0.86201416
  0.23040000   0.88847016
  0.23040000   0.54037206
  0.23040000   0.50576415
  0.23040000   0.91493714
  0.23040000   0.85665333
  0.23040000   0.39644585
  0.23040000   0.57764545
  0.23040000   0.81511440
  0.23040000   0.90146071
  0.23040000   0.64593659
  0.23040000   0.46821577
  0.23040000   0.89917398
  0.23040000   0.83882927
  0.23040000   0.44956662
  0.23040000   0.62789548
  0.23040000   0.86727115
  0.23040000   0.88000063
  0.23040000   0.52927432
  0.23040000   0.52927286
  0.23040000   0.91313595
  0.23040000   0.86721583
  0.23040000   0.39951186
  0.23040000   0.55074912
  0.23040000   0.81777486
  0.23040000   0.89817223
  0.23040000   0.64127842
  0.23040000   0.47825087
  0.23040000   0.90249005
  0.23040000   0.84481467
  0.23040000   0.43815292
  0.23040000   0.61237519
  0.23040000   0.85759566
  0.23040000   0.88742333
  0.23040000   0.55215200
  0.23040000   0.50937513
  0.23040000   0.91789620
  0.23040000   0.85750650
  0.23120000   0.44392575
  0.23120000   0.54850874
  0.23120000   0.86203714
  0.23120000   0.88757490
  0.23120000   0.54069746
  0.23120000   0.50864582
  0.23120000   0.91551900
  0.23120000   0.85798253
  0.23120000   0.39443589
  0.23120000   0.57423695
  0.23120000   0.81307927
  0.23120000   0.90202634
  0.23120000   0.65010205
  0.23120000   0.46662608
  0.23120000   0.89702510
  0.23120000   0.83846026
  0.23120000   0.45626979
  0.23120000   0.62977276
  0.23120000   0.87300946
  0.23120000   0.87789430
  0.23120000   0.51467855
  0.23120000   0.53448969
  0.23120000   0.90801259
  0.23120000   0.87065648
  0.23120000   0.41479878
  0.23120000   0.54392201
  0.23120000   0.83410143
  0.23120000   0.89328347
  0.23120000   0.60695245
  0.23120000   0.49362543
  0.23120000   0.91620477
  0.23120000   0.84999231
  0.23120000   0.39428910
  0.23120000   0.59424578
  0.23120000   0.81318785
  0.23120000   0.90114881
  0.23120000   0.65022796
  0.23120000   0.46931769
  0.23120000   0.89724306
  0.23120000   0.84038645
  0.23200000   0.40782683
  0.23200000   0.56302789
  0.23200000   0.82777725
  0.23200000   0.89827643
  0.23200000   0.61984368
  0.23200000   0.47900669
  0.23200000   0.91175703
  0.23200000   0.84250059
  0.23200000   0.41036315
  0.23200000   0.61487700
  0.23200000   0.83096267
  0.23200000   0.89347666
  0.23200000   0.61438557
  0.23200000   0.49340715
  0.23200000   0.91469773
  0.23200000   0.85054558
  0.23200000   0.39918196
  0.23200000   0.59385837
  0.23200000   0.81898541
  0.23200000   0.90020840
  0.23200000   0.63849839
  0.23200000   0.47286802
  0.23200000   0.90391125
  0.23200000   0.84092879
  0.23200000   0.43511773
  0.23200000   0.62182056
  0.23200000   0.85529192
  0.23200000   0.88558757
  0.23200000   0.55882497
  0.23200000   0.51549717
  0.23200000   0.91999224
  0.23200000   0.85984319
  0.23200000   0.37982086
  0.23200000   0.56759384
  0.23200000   0.79616161
  0.23200000   0.90520568
  0.23200000   0.68270499
  0.23200000   0.45539186
  0.23200000   0.87336334
  0.23200000   0.83695660
  0.23280000   0.38034903
  0.23280000   0.58396999
  0.23280000   0.79740772
  0.23280000   0.90549305
  0.23280000   0.68041938
  0.23280000   0.45497076
  0.23280000   0.87549596
  0.23280000   0.83617110
  0.23280000   0.51870790
  0.23280000   0.64116406
  0.23280000   0.91140281
  0.23280000   0.86182895
  0.23280000   0.40725816
  0.23280000   0.56685197
  0.23280000   0.82772560
  0.23280000   0.89898345
  0.23280000   0.61998187
  0.23280000   0.47724893
  0.23280000   0.91188385
  0.23280000   0.84144195
  0.23280000   0.41044067
  0.23280000   0.61768893
  0.23280000   0.83132604
  0.23280000   0.89280817
  0.23280000   0.61393684
  0.23280000   0.49569162
  0.23280000   0.91531332
  0.23280000   0.85177281
  0.23280000   0.39711916
  0.23280000   0.59079663
  0.23280000   0.81697684
  0.23280000   0.90116567
  0.23280000   0.64258003
  0.23280000   0.47014061
  0.23280000   0.90195784
  0.23280000   0.83974587
  0.23280000   0.44153944
  0.23280000   0.62565332
  0.23280000   0.86130264
  0.23280000   0.88289689
  0.23360000   0.65697811
  0.23360000   0.47250053
  0.23360000   0.89442927
  0.23360000   0.84396002
  0.23360000   0.46327687
  0.23360000   0.61836035
  0.23360000   0.87960127
  0.23360000   0.88049683
  0.23360000   0.49629078
  0.23360000   0.52671557
  0.23360000   0.89929217
  0.23360000   0.87110258
  0.23360000   0.44172527
  0.23360000   0.54688436
  0.23360000   0.86083249
  0.23360000   0.88794787
  0.23360000   0.54405351
  0.23360000   0.50858043
  0.23360000   0.91720373
  0.23360000   0.85768656
  0.23360000   0.38962092
  0.23360000   0.57502937
  0.23360000   0.80846109
  0.23360000   0.90360308
  0.23360000   0.65940160
  0.23360000   0.46226353
  0.23360000   0.89182707
  0.23360000   0.83717705
  0.23360000   0.47246371
  0.23360000   0.63527054
  0.23360000   0.88591389
  0.23360000   0.87241976
  0.23360000   0.48083884
  0.23360000   0.54759134
  0.23360000   0.89101616
  0.23360000   0.87971741
  0.23360000   0.46383193
  0.23360000   0.52576743
  0.23360000   0.87785885
  0.23360000   0.87703322
  0.23440000   0.53589742
  0.23440000   0.52992294
  0.23440000   0.91677063
  0.23440000   0.86680693
  0.23440000   0.38889399
  0.23440000   0.55156816
  0.23440000   0.80725925
  0.23440000   0.90154185
  0.23440000   0.66254646
  0.23440000   0.46865297
  0.23440000   0.89070952
  0.23440000   0.84244665
  0.23440000   0.47468755
  0.23440000   0.62339110
  0.23440000   0.88806601
  0.23440000   0.87656120
  0.23440000   0.47364649
  0.23440000   0.53587318
  0.23440000   0.88589598
  0.23440000   0.87830344
  0.23440000   0.47907966
  0.23440000   0.53147424
  0.23440000   0.88928060
  0.23440000   0.87585097
  0.23440000   0.47000644
  0.23440000   0.53732263
  0.23440000   0.88329992
  0.23440000   0.87940477
  0.23440000   0.48606771
  0.23440000   0.52902265
  0.23440000   0.89359937
  0.23440000   0.87369478
  0.23440000   0.45800318
  0.23440000   0.54194366
  0.23440000   0.87446685
  0.23440000   0.88317857
  0.23440000   0.50945922
  0.23440000   0.52034445
  0.23440000   0.90587075
  0.23440000   0.86662446
  0.23520000   0.47729331
  0.23520000   0.55106602
  0.23520000   0.88941335
  0.23520000   0.88120446
  0.23520000   0.46837240
  0.23520000   0.52264816
  0.23520000   0.88162956
  0.23520000   0.87507313
  0.23520000   0.49212847
  0.23520000   0.54179317
  0.23520000   0.89821588
  0.23520000   0.87630581
  0.23520000   0.44380056
  0.23520000   0.53349961
  0.23520000   0.86257296
  0.23520000   0.88416608
  0.23520000   0.54089751
  0.23520000   0.51978916
  0.23520000   0.91773328
  0.23520000   0.86268393
  0.23520000   0.38696786
  0.23520000   0.56228162
  0.23520000   0.80563820
  0.23520000   0.90368971
  0.23520000   0.66522664
  0.23520000   0.46224309
  0.23520000   0.88850294
  0.23520000   0.83844696
  0.23520000   0.48218630
  0.23520000   0.63380219
  0.23520000   0.89310053
  0.23520000   0.87119273
  0.23520000   0.46071701
  0.23520000   0.54944946
  0.23520000   0.87733046
  0.23520000   0.88437815
  0.23520000   0.50151538
  0.23520000   0.51668480
  0.23520000   0.90200839
  0.23520000   0.86647443
  0.23600000   0.64464772
  0.23600000   0.46650881
  0.23600000   0.90161829
  0.23600000   0.83764951
  0.23600000   0.44378106
  0.23600000   0.63188224
  0.23600000   0.86426063
  0.23600000   0.88035085
  0.23600000   0.53813048
  0.23600000   0.53083442
  0.23600000   0.91803896
  0.23600000   0.86688292
  0.23600000   0.38511738
  0.23600000   0.55128820
  0.23600000   0.80341278
  0.23600000   0.90267294
  0.23600000   0.67006578
  0.23600000   0.46535401
  0.23600000   0.88568397
  0.23600000   0.84181767
  0.23600000   0.48967125
  0.23600000   0.62683642
  0.23600000   0.89824358
  0.23600000   0.87252595
  0.23600000   0.44526753
  0.23600000   0.54439343
  0.23600000   0.86477423
  0.23600000   0.88687265
  0.23600000   0.53461116
  0.23600000   0.51208558
  0.23600000   0.91575346
  0.23600000   0.86012906
  0.23600000   0.39415066
  0.23600000   0.57021023
  0.23600000   0.81443433
  0.23600000   0.90280077
  0.23600000   0.64777421
  0.23600000   0.46608700
  0.23600000   0.89992356
  0.23600000   0.83789379
  0.23680000   0.38257901
  0.23680000   0.59514848
  0.23680000   0.80164331
  0.23680000   0.90483991
  0.23680000   0.67310888
  0.23680000   0.45889300
  0.23680000   0.88306133
  0.23680000   0.83782792
  0.23680000   0.49826418
  0.23680000   0.63724734
  0.23680000   0.90317941
  0.23680000   0.86684869
  0.23680000   0.43215480
  0.23680000   0.55829424
  0.23680000   0.85386802
  0.23680000   0.89263812
  0.23680000   0.56094927
  0.23680000   0.49689034
  0.23680000   0.92058535
  0.23680000   0.85095977
  0.23680000   0.38114315
  0.23680000   0.59163192
  0.23680000   0.79990749
  0.23680000   0.90556892
  0.23680000   0.67622546
  0.23680000   0.45644233
  0.23680000   0.88039636
  0.23680000   0.83667691
  0.23680000   0.50600812
  0.23680000   0.64053409
  0.23680000   0.90710016
  0.23680000   0.86407172
  0.23680000   0.42089372
  0.23680000   0.56415445
  0.23680000   0.84319152
  0.23680000   0.89605694
  0.23680000   0.58595983
  0.23680000   0.48743919
  0.23680000   0.92061232
  0.23680000   0.84549847
  0.23760000   0.57693131
  0.23760000   0.65160267
  0.23760000   0.92530342
  0.23760000   0.85251725
  0.23760000   0.36609795
  0.23760000   0.58589137
  0.23760000   0.78179170
  0.23760000   0.90975659
  0.23760000   0.70842830
  0.23760000   0.44117086
  0.23760000   0.84930490
  0.23760000   0.83268891
  0.23760000   0.58864328
  0.23760000   0.65379389
  0.23760000   0.92480504
  0.23760000   0.85146705
  0.23760000   0.36804022
  0.23760000   0.58882714
  0.23760000   0.78428850
  0.23760000   0.90912877
  0.23760000   0.70425351
  0.23760000   0.44354287
  0.23760000   0.85395755
  0.23760000   0.83356168
  0.23760000   0.57692869
  0.23760000   0.65160254
  0.23760000   0.92530358
  0.23760000   0.85251749
  0.23760000   0.36609756
  0.23760000   0.58589084
  0.23760000   0.78179137
  0.23760000   0.90975688
  0.23760000   0.70842900
  0.23760000   0.44117008
  0.23760000   0.84930420
  0.23760000   0.83268861
  0.23760000   0.58864527
  0.23760000   0.65379476
  0.23760000   0.92480502
  0.23760000   0.85146678
  0.23840000   0.57359883
  0.23840000   0.65124451
  0.23840000   0.92553751
  0.23840000   0.85272257
  0.23840000   0.36544258
  0.23840000   0.58550958
  0.23840000   0.78124817
  0.23840000   0.91010167
  0.23840000   0.70937589
  0.23840000   0.44026764
  0.23840000   0.84845404
  0.23840000   0.83228317
  0.23840000   0.59101143
  0.23840000   0.65503854
  0.23840000   0.92482946
  0.23840000   0.85082610
  0.23840000   0.36831092
  0.23840000   0.59070105
  0.23840000   0.78494386
  0.23840000   0.90908498
  0.23840000   0.70322805
  0.23840000   0.44405399
  0.23840000   0.85534104
  0.23840000   0.83381385
  0.23840000   0.57359577
  0.23840000   0.65124431
  0.23840000   0.92553760
  0.23840000   0.85272289
  0.23840000   0.36544241
  0.23840000   0.58550892
  0.23840000   0.78124812
  0.23840000   0.91010192
  0.23840000   0.70937613
  0.23840000   0.44026703
  0.23840000   0.84845386
  0.23840000   0.83228288
  0.23840000   0.59101214
  0.23840000   0.65503936
  0.23840000   0.92482953
  0.23840000   0.85082582
  0.23920000   0.56875646
  0.23920000   0.65094843
  0.23920000   0.92559272
  0.23920000   0.85294923
  0.23920000   0.36537021
  0.23920000   0.58516818
  0.23920000   0.78144523
  0.23920000   0.91031348
  0.23920000   0.70907351
  0.23920000   0.43990466
  0.23920000   0.84900412
  0.23920000   0.83199279
  0.23920000   0.58992792
  0.23920000   0.65598053
  0.23920000   0.92516896
  0.23920000   0.85023145
  0.23920000   0.36752268
  0.23920000   0.59228078
  0.23920000   0.78425666
  0.23920000   0.90928365
  0.23920000   0.70450580
  0.23920000   0.44359012
  0.23920000   0.85425222
  0.23920000   0.83387526
  0.23920000   0.57650884
  0.23920000   0.65147030
  0.23920000   0.92588439
  0.23920000   0.85257952
  0.23920000   0.36451692
  0.23920000   0.58595647
  0.23920000   0.78037256
  0.23920000   0.91046475
  0.23920000   0.71089714
  0.23920000   0.43925075
  0.23920000   0.84696095
  0.23920000   0.83194070
  0.23920000   0.59491969
  0.23920000   0.65614704
  0.23920000   0.92463588
  0.23920000   0.85033953
  0.24000000   0.70076136
  0.24000000   0.44556463
  0.24000000   0.85855304
  0.24000000   0.83459919
  0.24000000   0.56566669
  0.24000000   0.64981444
  0.24000000   0.92568660
  0.24000000   0.85363524
  0.24000000   0.36505015
  0.24000000   0.58363767
  0.24000000   0.78131134
  0.24000000   0.91063380
  0.24000000   0.70930717
  0.24000000   0.43914498
  0.24000000   0.84892995
  0.24000000   0.83150669
  0.24000000   0.59041501
  0.24000000   0.65738126
  0.24000000   0.92534160
  0.24000000   0.84941068
  0.24000000   0.36734708
  0.24000000   0.59451311
  0.24000000   0.78434339
  0.24000000   0.90924927
  0.24000000   0.70448845
  0.24000000   0.44397686
  0.24000000   0.85459062
  0.24000000   0.83429749
  0.24000000   0.57575729
  0.24000000   0.65078342
  0.24000000   0.92619398
  0.24000000   0.85295126
  0.24000000   0.36357003
  0.24000000   0.58511131
  0.24000000   0.77944688
  0.24000000   0.91090259
  0.24000000   0.71246363
  0.24000000   0.43798522
  0.24000000   0.84536275
  0.24000000   0.83139190
  0.24080000   0.55258723
  0.24080000   0.49944927
  0.24080000   0.92090236
  0.24080000   0.85267168
  0.24080000   0.38051660
  0.24080000   0.58848913
  0.24080000   0.80058205
  0.24080000   0.90676880
  0.24080000   0.67508984
  0.24080000   0.45420594
  0.24080000   0.88239161
  0.24080000   0.83497670
  0.24080000   0.50175722
  0.24080000   0.64555021
  0.24080000   0.90617865
  0.24080000   0.86243274
  0.24080000   0.42501891
  0.24080000   0.57028534
  0.24080000   0.84889676
  0.24080000   0.89601989
  0.24080000   0.57288388
  0.24080000   0.48876716
  0.24080000   0.92229384
  0.24080000   0.84617050
  0.24080000   0.37768840
  0.24080000   0.60403672
  0.24080000   0.79723257
  0.24080000   0.90538737
  0.24080000   0.68206239
  0.24080000   0.45802373
  0.24080000   0.87725656
  0.24080000   0.83963196
  0.24080000   0.51497667
  0.24080000   0.63575598
  0.24080000   0.91291511
  0.24080000   0.86493830
  0.24080000   0.40331458
  0.24080000   0.56075487
  0.24080000   0.82624911
  0.24080000   0.90063385
  0.24160000   0.37376790
  0.24160000   0.58773410
  0.24160000   0.79285178
  0.24160000   0.90871574
  0.24160000   0.68936957
  0.24160000   0.44748289
  0.24160000   0.87006095
  0.24160000   0.83328076
  0.24160000   0.53625536
  0.24160000   0.65211620
  0.24160000   0.92040772
  0.24160000   0.85426385
  0.24160000   0.38247219
  0.24160000   0.58531132
  0.24160000   0.80337719
  0.24160000   0.90678470
  0.24160000   0.66986962
  0.24160000   0.45486176
  0.24160000   0.88671769
  0.24160000   0.83438017
  0.24160000   0.48986951
  0.24160000   0.64623493
  0.24160000   0.89980766
  0.24160000   0.86428246
  0.24160000   0.44409833
  0.24160000   0.56815244
  0.24160000   0.86673707
  0.24160000   0.89128968
  0.24160000   0.52920941
  0.24160000   0.50110525
  0.24160000   0.91524493
  0.24160000   0.85563343
  0.24160000   0.39815622
  0.24160000   0.58402894
  0.24160000   0.82128023
  0.24160000   0.90288311
  0.24160000   0.63419733
  0.24160000   0.46836034
  0.24160000   0.90875055
  0.24160000   0.83748985
  0.24240000   0.70793871
  0.24240000   0.44132733
  0.24240000   0.85146275
  0.24240000   0.83330742
  0.24240000   0.58433920
  0.24240000   0.65408750
  0.24240000   0.92677263
  0.24240000   0.85113915
  0.24240000   0.36266885
  0.24240000   0.59017754
  0.24240000   0.77922675
  0.24240000   0.91128718
  0.24240000   0.71306812
  0.24240000   0.43752723
  0.24240000   0.84544865
  0.24240000   0.83149607
  0.24240000   0.59945436
  0.24240000   0.65835495
  0.24240000   0.92502685
  0.24240000   0.84923901
  0.24240000   0.36899199
  0.24240000   0.59593251
  0.24240000   0.78731211
  0.24240000   0.90921618
  0.24240000   0.69954157
  0.24240000   0.44536863
  0.24240000   0.86055504
  0.24240000   0.83437780
  0.24240000   0.56116739
  0.24240000   0.65105510
  0.24240000   0.92601257
  0.24240000   0.85308998
  0.24240000   0.36463789
  0.24240000   0.58564357
  0.24240000   0.78169445
  0.24240000   0.91116148
  0.24240000   0.70880536
  0.24240000   0.43835394
  0.24240000   0.85017985
  0.24240000   0.83099390
  0.24320000   0.39661758
  0.24320000   0.56913502
  0.24320000   0.81985287
  0.24320000   0.90339436
  0.24320000   0.63726853
  0.24320000   0.46725939
  0.24320000   0.90780812
  0.24320000   0.83721651
  0.24320000   0.42662394
  0.24320000   0.63317036
  0.24320000   0.85109282
  0.24320000   0.88482918
  0.24320000   0.57154953
  0.24320000   0.52220782
  0.24320000   0.92570125
  0.24320000   0.86204904
  0.24320000   0.36295679
  0.24320000   0.56261235
  0.24320000   0.77919264
  0.24320000   0.91099861
  0.24320000   0.71312108
  0.24320000   0.43857090
  0.24320000   0.84570729
  0.24320000   0.83247161
  0.24320000   0.59873047
  0.24320000   0.65638783
  0.24320000   0.92548638
  0.24320000   0.85033770
  0.24320000   0.36732537
  0.24320000   0.59316661
  0.24320000   0.78546884
  0.24320000   0.91008871
  0.24320000   0.70263409
  0.24320000   0.44260132
  0.24320000   0.85738643
  0.24320000   0.83299217
  0.24320000   0.56976433
  0.24320000   0.65477548
  0.24320000   0.92690167
  0.24320000   0.85072076
  0.24400000   0.36074933
  0.24400000   0.58998379
  0.24400000   0.77734952
  0.24400000   0.91210870
  0.24400000   0.71624086
  0.24400000   0.43514469
  0.24400000   0.84214036
  0.24400000   0.83054774
  0.24400000   0.60798456
  0.24400000   0.66108492
  0.24400000   0.92382733
  0.24400000   0.84816413
  0.24400000   0.37361510
  0.24400000   0.59981914
  0.24400000   0.79367718
  0.24400000   0.90790623
  0.24400000   0.68855442
  0.24400000   0.45096360
  0.24400000   0.87205768
  0.24400000   0.83614226
  0.24400000   0.53082591
  0.24400000   0.64614031
  0.24400000   0.91985920
  0.24400000   0.85805361
  0.24400000   0.38375804
  0.24400000   0.57667839
  0.24400000   0.80566581
  0.24400000   0.90713151
  0.24400000   0.66556314
  0.24400000   0.45489782
  0.24400000   0.89060343
  0.24400000   0.83359277
  0.24400000   0.47943395
  0.24400000   0.64791719
  0.24400000   0.89402846
  0.24400000   0.86560608
  0.24400000   0.46142206
  0.24400000   0.56749666
  0.24400000   0.88179944
  0.24400000   0.88733191
  0.24480000   0.55327171
  0.24480000   0.65133009
  0.24480000   0.92565822
  0.24480000   0.85330364
  0.24480000   0.36625998
  0.24480000   0.58608296
  0.24480000   0.78463750
  0.24480000   0.91127845
  0.24480000   0.70390699
  0.24480000   0.43928170
  0.24480000   0.85622117
  0.24480000   0.83070097
  0.24480000   0.57364311
  0.24480000   0.66066267
  0.24480000   0.92735072
  0.24480000   0.84711166
  0.24480000   0.36233498
  0.24480000   0.60071278
  0.24480000   0.77971750
  0.24480000   0.91056028
  0.24480000   0.71285175
  0.24480000   0.44066300
  0.24480000   0.84689849
  0.24480000   0.83448925
  0.24480000   0.59583383
  0.24480000   0.65241466
  0.24480000   0.92672059
  0.24480000   0.85247482
  0.24480000   0.36305721
  0.24480000   0.58765919
  0.24480000   0.78060663
  0.24480000   0.91194819
  0.24480000   0.71079742
  0.24480000   0.43650287
  0.24480000   0.84862439
  0.24480000   0.83027054
  0.24480000   0.59263060
  0.24480000   0.66196911
  0.24480000   0.92659868
  0.24480000   0.84662176
  0.24560000   0.37573035
  0.24560000   0.61292652
  0.24560000   0.79655770
  0.24560000   0.90485064
  0.24560000   0.68430234
  0.24560000   0.46121998
  0.24560000   0.87740892
  0.24560000   0.84301571
  0.24560000   0.51487086
  0.24560000   0.62949751
  0.24560000   0.91482251
  0.24560000   0.86755307
  0.24560000   0.39751615
  0.24560000   0.55453444
  0.24560000   0.82141569
  0.24560000   0.90201011
  0.24560000   0.63478621
  0.24560000   0.47246283
  0.24560000   0.91032716
  0.24560000   0.84048426
  0.24560000   0.41857981
  0.24560000   0.62525315
  0.24560000   0.84426847
  0.24560000   0.89022707
  0.24560000   0.58687528
  0.24560000   0.50789856
  0.24560000   0.92543798
  0.24560000   0.85618381
  0.24560000   0.36592576
  0.24560000   0.57884584
  0.24560000   0.78426723
  0.24560000   0.91167979
  0.24560000   0.70442025
  0.24560000   0.43816728
  0.24560000   0.85577562
  0.24560000   0.82993882
  0.24560000   0.57510025
  0.24560000   0.66267775
  0.24560000   0.92753500
  0.24560000   0.84579841
  0.24640000   0.70884510
  0.24640000   0.44238180
  0.24640000   0.85198970
  0.24640000   0.83497938
  0.24640000   0.58360338
  0.24640000   0.65172777
  0.24640000   0.92836120
  0.24640000   0.85239270
  0.24640000   0.35793289
  0.24640000   0.58744199
  0.24640000   0.77454068
  0.24640000   0.91348650
  0.24640000   0.72083031
  0.24640000   0.43106056
  0.24640000   0.83710769
  0.24640000   0.82857878
  0.24640000   0.62083663
  0.24640000   0.66623843
  0.24640000   0.92085736
  0.24640000   0.84611943
  0.24640000   0.38443905
  0.24640000   0.60727780
  0.24640000   0.80762213
  0.24640000   0.90432859
  0.24640000   0.66311593
  0.24640000   0.46461143
  0.24640000   0.89422327
  0.24640000   0.84046574
  0.24640000   0.46778786
  0.24640000   0.63164450
  0.24640000   0.88740231
  0.24640000   0.87579954
  0.24640000   0.47815580
  0.24640000   0.54267396
  0.24640000   0.89376566
  0.24640000   0.87984833
  0.24640000   0.45817034
  0.24640000   0.52923756
  0.24640000   0.87839936
  0.24640000   0.88049726
  0.24720000   0.70939264
  0.24720000   0.44305961
  0.24720000   0.85177053
  0.24720000   0.83582416
  0.24720000   0.58414486
  0.24720000   0.65009599
  0.24720000   0.92871270
  0.24720000   0.85328539
  0.24720000   0.35670076
  0.24720000   0.58524269
  0.24720000   0.77320337
  0.24720000   0.91408869
  0.24720000   0.72296175
  0.24720000   0.42916642
  0.24720000   0.83459966
  0.24720000   0.82760923
  0.24720000   0.62704908
  0.24720000   0.66857134
  0.24720000   0.91883319
  0.24720000   0.84533718
  0.24720000   0.39140760
  0.24720000   0.61051867
  0.24720000   0.81601732
  0.24720000   0.90197494
  0.24720000   0.64681324
  0.24720000   0.47288368
  0.24720000   0.90519218
  0.24720000   0.84291861
  0.24720000   0.43435768
  0.24720000   0.62216973
  0.24720000   0.86022218
  0.24720000   0.88743838
  0.24720000   0.54851383
  0.24720000   0.51541381
  0.24720000   0.92374386
  0.24720000   0.86036545
  0.24720000   0.37069166
  0.24720000   0.56945098
  0.24720000   0.79066078
  0.24720000   0.91063623
  0.24800000   0.46962950
  0.24800000   0.53680132
  0.24800000   0.88810564
  0.24800000   0.88026695
  0.24800000   0.47474509
  0.24800000   0.53037918
  0.24800000   0.89127616
  0.24800000   0.87715952
  0.24800000   0.46644630
  0.24800000   0.53809975
  0.24800000   0.88574561
  0.24800000   0.88128820
  0.24800000   0.48111914
  0.24800000   0.52811516
  0.24800000   0.89538055
  0.24800000   0.87502234
  0.24800000   0.45501210
  0.24800000   0.54267444
  0.24800000   0.87712215
  0.24800000   0.88514808
  0.24800000   0.50406753
  0.24800000   0.51924574
  0.24800000   0.90811293
  0.24800000   0.86738861
  0.24800000   0.41865058
  0.24800000   0.55859509
  0.24800000   0.84475417
  0.24800000   0.89738480
  0.24800000   0.58351167
  0.24800000   0.48751240
  0.24800000   0.92467421
  0.24800000   0.84538661
  0.24800000   0.37169712
  0.24800000   0.60713091
  0.24800000   0.79248320
  0.24800000   0.90766105
  0.24800000   0.69129351
  0.24800000   0.45277341
  0.24800000   0.87108952
  0.24800000   0.83861728
  0.24880000   0.36689572
  0.24880000   0.59547252
  0.24880000   0.78681917
  0.24880000   0.91101035
  0.24880000   0.70058884
  0.24880000   0.44175479
  0.24880000   0.86118548
  0.24880000   0.83229718
  0.24880000   0.56152970
  0.24880000   0.65813116
  0.24880000   0.92796137
  0.24880000   0.84888139
  0.24880000   0.36069269
  0.24880000   0.59726815
  0.24880000   0.77904717
  0.24880000   0.91234561
  0.24880000   0.71391886
  0.24880000   0.43625525
  0.24880000   0.84649515
  0.24880000   0.83149692
  0.24880000   0.59848052
  0.24880000   0.66070513
  0.24880000   0.92733661
  0.24880000   0.84765234
  0.24880000   0.36320253
  0.24880000   0.60075438
  0.24880000   0.78232447
  0.24880000   0.91124793
  0.24880000   0.70865309
  0.24880000   0.44030722
  0.24880000   0.85276895
  0.24880000   0.83346813
  0.24880000   0.58262949
  0.24880000   0.65607251
  0.24880000   0.92905445
  0.24880000   0.84986286
  0.24880000   0.35684872
  0.24880000   0.59423143
  0.24880000   0.77406687
  0.24880000   0.91366040
  0.24960000   0.68819705
  0.24960000   0.44654499
  0.24960000   0.87368558
  0.24960000   0.83291213
  0.24960000   0.52847763
  0.24960000   0.65540118
  0.24960000   0.92059169
  0.24960000   0.85323704
  0.24960000   0.38389598
  0.24960000   0.59056784
  0.24960000   0.80806649
  0.24960000   0.90755545
  0.24960000   0.66147123
  0.24960000   0.45582399
  0.24960000   0.89539310
  0.24960000   0.83369137
  0.24960000   0.46671080
  0.24960000   0.64833878
  0.24960000   0.88710674
  0.24960000   0.86848800
  0.24960000   0.48181433
  0.24960000   0.56392994
  0.24960000   0.89819905
  0.24960000   0.88276357
  0.24960000   0.44480305
  0.24960000   0.52060417
  0.24960000   0.86800076
  0.24960000   0.88095748
  0.24960000   0.53027846
  0.24960000   0.53352915
  0.24960000   0.92066404
  0.24960000   0.86846943
  0.24960000   0.37890283
  0.24960000   0.55027460
  0.24960000   0.80095354
  0.24960000   0.90663063
  0.24960000   0.67561049
  0.24960000   0.45766680
  0.24960000   0.88539830
  0.24960000   0.83837935
  0.25040000   0.67220226
  0.25040000   0.45174355
  0.25040000   0.88763782
  0.25040000   0.83303879
  0.25040000   0.48966397
  0.25040000   0.65240155
  0.25040000   0.90256596
  0.25040000   0.86132718
  0.25040000   0.43843802
  0.25040000   0.57811647
  0.25040000   0.86521551
  0.25040000   0.89387603
  0.25040000   0.53391303
  0.25040000   0.49703110
  0.25040000   0.91961768
  0.25040000   0.85302558
  0.25040000   0.38674055
  0.25040000   0.59158924
  0.25040000   0.81156536
  0.25040000   0.90678121
  0.25040000   0.65465567
  0.25040000   0.45880926
  0.25040000   0.90024747
  0.25040000   0.83450109
  0.25040000   0.45216904
  0.25040000   0.64509021
  0.25040000   0.87615776
  0.25040000   0.87369877
  0.25040000   0.51108034
  0.25040000   0.55271461
  0.25040000   0.91433581
  0.25040000   0.87573824
  0.25040000   0.39734576
  0.25040000   0.53384233
  0.25040000   0.82195023
  0.25040000   0.89798554
  0.25040000   0.63560622
  0.25040000   0.48625633
  0.25040000   0.91296728
  0.25040000   0.84936300
  0.25120000   0.56475951
  0.25120000   0.66655239
  0.25120000   0.92868983
  0.25120000   0.84336764
  0.25120000   0.36030675
  0.25120000   0.61128069
  0.25120000   0.77937796
  0.25120000   0.91028089
  0.25120000   0.71448323
  0.25120000   0.44353072
  0.25120000   0.84761556
  0.25120000   0.83826851
  0.25120000   0.59469495
  0.25120000   0.64602899
  0.25120000   0.92946941
  0.25120000   0.85569912
  0.25120000   0.35440107
  0.25120000   0.57995632
  0.25120000   0.77158381
  0.25120000   0.91572281
  0.25120000   0.72559422
  0.25120000   0.42496105
  0.25120000   0.83218368
  0.25120000   0.82511743
  0.25120000   0.63413863
  0.25120000   0.67534764
  0.25120000   0.91694380
  0.25120000   0.84155380
  0.25120000   0.39943150
  0.25120000   0.62207849
  0.25120000   0.82636696
  0.25120000   0.89728588
  0.25120000   0.62681657
  0.25120000   0.48911717
  0.25120000   0.91726247
  0.25120000   0.84981059
  0.25120000   0.39558942
  0.25120000   0.60129871
  0.25120000   0.82213892
  0.25120000   0.90335597
  0.25200000   0.35565358
  0.25200000   0.57015398
  0.25200000   0.77333200
  0.25200000   0.91541531
  0.25200000   0.72288034
  0.25200000   0.42652545
  0.25200000   0.83593275
  0.25200000   0.82586196
  0.25200000   0.62558231
  0.25200000   0.67422105
  0.25200000   0.92068955
  0.25200000   0.84112181
  0.25200000   0.38761560
  0.25200000   0.62150198
  0.25200000   0.81322295
  0.25200000   0.90072157
  0.25200000   0.65384938
  0.25200000   0.47812098
  0.25200000   0.90346012
  0.25200000   0.84787660
  0.25200000   0.43950692
  0.25200000   0.61250512
  0.25200000   0.86684326
  0.25200000   0.88939150
  0.25200000   0.53148519
  0.25200000   0.51062425
  0.25200000   0.92054574
  0.25200000   0.85989352
  0.25200000   0.38224758
  0.25200000   0.57401213
  0.25200000   0.80663364
  0.25200000   0.90888051
  0.25200000   0.66410637
  0.25200000   0.45234289
  0.25200000   0.89401429
  0.25200000   0.83167190
  0.25200000   0.47182864
  0.25200000   0.65430173
  0.25200000   0.89136553
  0.25200000   0.86414729
  0.25280000   0.50209546
  0.25280000   0.53385471
  0.25280000   0.90988405
  0.25280000   0.87289444
  0.25280000   0.41261774
  0.25280000   0.54462073
  0.25280000   0.83984364
  0.25280000   0.89713156
  0.25280000   0.59602990
  0.25280000   0.49020111
  0.25280000   0.92555961
  0.25280000   0.84732589
  0.25280000   0.36941729
  0.25280000   0.60353212
  0.25280000   0.79145896
  0.25280000   0.90996158
  0.25280000   0.69310173
  0.25280000   0.44712956
  0.25280000   0.87041198
  0.25280000   0.83504740
  0.25280000   0.53756887
  0.25280000   0.65222918
  0.25280000   0.92480912
  0.25280000   0.85398120
  0.25280000   0.37060544
  0.25280000   0.58750107
  0.25280000   0.79305900
  0.25280000   0.91180547
  0.25280000   0.68951934
  0.25280000   0.44169062
  0.25280000   0.87303514
  0.25280000   0.82953708
  0.25280000   0.53187432
  0.25280000   0.66442698
  0.25280000   0.92238581
  0.25280000   0.84725167
  0.25280000   0.38043343
  0.25280000   0.60577350
  0.25280000   0.80514484
  0.25280000   0.90682098
  0.25360000   0.71250185
  0.25360000   0.45419924
  0.25360000   0.85194634
  0.25360000   0.84663073
  0.25360000   0.58248370
  0.25360000   0.62689423
  0.25360000   0.93195283
  0.25360000   0.86351227
  0.25360000   0.34426590
  0.25360000   0.55873919
  0.25360000   0.75827443
  0.25360000   0.91728039
  0.25360000   0.74634162
  0.25360000   0.41788030
  0.25360000   0.80464609
  0.25360000   0.82520207
  0.25360000   0.69319856
  0.25360000   0.67250468
  0.25360000   0.87814953
  0.25360000   0.85733821
  0.25360000   0.51161096
  0.25360000   0.59723572
  0.25360000   0.91695643
  0.25360000   0.87656781
  0.25360000   0.38966717
  0.25360000   0.53152651
  0.25360000   0.81438867
  0.25360000   0.89992183
  0.25360000   0.65157680
  0.25360000   0.48104733
  0.25360000   0.90554021
  0.25360000   0.84923107
  0.25360000   0.43307261
  0.25360000   0.60885726
  0.25360000   0.86156854
  0.25360000   0.89209635
  0.25360000   0.54460238
  0.25360000   0.50404070
  0.25360000   0.92430334
  0.25360000   0.85548076
  0.25440000   0.59108598
  0.25440000   0.63459549
  0.25440000   0.93147239
  0.25440000   0.86073893
  0.25440000   0.34689796
  0.25440000   0.56666130
  0.25440000   0.76241496
  0.25440000   0.91775220
  0.25440000   0.73993798
  0.25440000   0.41756873
  0.25440000   0.81373764
  0.25440000   0.82303767
  0.25440000   0.67547654
  0.25440000   0.67894870
  0.25440000   0.89301952
  0.25440000   0.84765603
  0.25440000   0.47208333
  0.25440000   0.61797842
  0.25440000   0.89397463
  0.25440000   0.88005882
  0.25440000   0.45938502
  0.25440000   0.53173071
  0.25440000   0.88256094
  0.25440000   0.88163170
  0.25440000   0.49132298
  0.25440000   0.53046725
  0.25440000   0.90425506
  0.25440000   0.87393088
  0.25440000   0.42997235
  0.25440000   0.54474053
  0.25440000   0.85766400
  0.25440000   0.89266603
  0.25440000   0.55427037
  0.25440000   0.50299339
  0.25440000   0.92640322
  0.25440000   0.85419633
  0.25440000   0.36507932
  0.25440000   0.58628179
  0.25440000   0.78650591
  0.25440000   0.91349897
  0.25520000   0.55444825
  0.25520000   0.53278715
  0.25520000   0.92892040
  0.25520000   0.86600058
  0.25520000   0.35366504
  0.25520000   0.55422717
  0.25520000   0.77123574
  0.25520000   0.91475311
  0.25520000   0.72686682
  0.25520000   0.42910651
  0.25520000   0.83244959
  0.25520000   0.82995169
  0.25520000   0.63331458
  0.25520000   0.66606505
  0.25520000   0.91931949
  0.25520000   0.84795241
  0.25520000   0.39096002
  0.25520000   0.60660175
  0.25520000   0.81847259
  0.25520000   0.90433538
  0.25520000   0.64203954
  0.25520000   0.46875506
  0.25520000   0.91001042
  0.25520000   0.83939551
  0.25520000   0.42217886
  0.25520000   0.63151656
  0.25520000   0.85124082
  0.25520000   0.88816536
  0.25520000   0.57231884
  0.25520000   0.51714962
  0.25520000   0.92979453
  0.25520000   0.85984690
  0.25520000   0.35249262
  0.25520000   0.57001963
  0.25520000   0.77017356
  0.25520000   0.91678961
  0.25520000   0.72792074
  0.25520000   0.42248789
  0.25520000   0.83024894
  0.25520000   0.82409204
  0.25600000   0.71859040
  0.25600000   0.42575301
  0.25600000   0.84214536
  0.25600000   0.82433477
  0.25600000   0.61235518
  0.25600000   0.67920805
  0.25600000   0.92577948
  0.25600000   0.83572891
  0.25600000   0.37321444
  0.25600000   0.63293910
  0.25600000   0.79703553
  0.25600000   0.90100205
  0.25600000   0.68651858
  0.25600000   0.47653186
  0.25600000   0.88084557
  0.25600000   0.85510091
  0.25600000   0.50455369
  0.25600000   0.60289920
  0.25600000   0.91422683
  0.25600000   0.87677057
  0.25600000   0.39865362
  0.25600000   0.53306694
  0.25600000   0.82548204
  0.25600000   0.89834333
  0.25600000   0.62874880
  0.25600000   0.48745477
  0.25600000   0.91794844
  0.25600000   0.84903859
  0.25600000   0.39457676
  0.25600000   0.60449371
  0.25600000   0.82269807
  0.25600000   0.90378945
  0.25600000   0.63315204
  0.25600000   0.47092722
  0.25600000   0.91454241
  0.25600000   0.83932772
  0.25600000   0.40803523
  0.25600000   0.62984978
  0.25600000   0.83702068
  0.25600000   0.89277073
  0.25680000   0.71164856
  0.25680000   0.66924726
  0.25680000   0.86089709
  0.25680000   0.86562663
  0.25680000   0.55598152
  0.25680000   0.57962424
  0.25680000   0.93179236
  0.25680000   0.87278863
  0.25680000   0.34261661
  0.25680000   0.53466120
  0.25680000   0.75610998
  0.25680000   0.91319156
  0.25680000   0.75145335
  0.25680000   0.43112337
  0.25680000   0.80017460
  0.25680000   0.84001256
  0.25680000   0.69904171
  0.25680000   0.63940814
  0.25680000   0.87550448
  0.25680000   0.87887428
  0.25680000   0.51303429
  0.25680000   0.54121174
  0.25680000   0.91724728
  0.25680000   0.87312215
  0.25680000   0.39019666
  0.25680000   0.54194932
  0.25680000   0.81667481
  0.25680000   0.90323707
  0.25680000   0.64615401
  0.25680000   0.47238525
  0.25680000   0.90876702
  0.25680000   0.84261414
  0.25680000   0.42555253
  0.25680000   0.62488073
  0.25680000   0.85530086
  0.25680000   0.88988238
  0.25680000   0.56188660
  0.25680000   0.51243004
  0.25680000   0.92919063
  0.25680000   0.85811781
  0.25760000   0.69111590
  0.25760000   0.45310648
  0.25760000   0.87468456
  0.25760000   0.83973618
  0.25760000   0.52603464
  0.25760000   0.64242930
  0.25760000   0.92327285
  0.25760000   0.86037938
  0.25760000   0.37487133
  0.25760000   0.57343352
  0.25760000   0.79989844
  0.25760000   0.91192933
  0.25760000   0.67714118
  0.25760000   0.44396083
  0.25760000   0.88538032
  0.25760000   0.82845095
  0.25760000   0.49902820
  0.25760000   0.66617218
  0.25760000   0.90970042
  0.25760000   0.85122329
  0.25760000   0.42093021
  0.25760000   0.60374948
  0.25760000   0.85148143
  0.25760000   0.89694374
  0.25760000   0.56915535
  0.25760000   0.49220385
  0.25760000   0.92846857
  0.25760000   0.84794579
  0.25760000   0.36069840
  0.25760000   0.60196217
  0.25760000   0.78214870
  0.25760000   0.91345683
  0.25760000   0.70929097
  0.25760000   0.43617875
  0.25760000   0.85447779
  0.25760000   0.83110615
  0.25760000   0.58104176
  0.25760000   0.66462874
  0.25760000   0.93172496
  0.25760000   0.84430124
  0.25840000   0.50885462
  0.25840000   0.61611204
  0.25840000   0.91706518
  0.25840000   0.87295553
  0.25840000   0.39127529
  0.25840000   0.54309452
  0.25840000   0.81856139
  0.25840000   0.90348211
  0.25840000   0.64231814
  0.25840000   0.47236051
  0.25840000   0.91128244
  0.25840000   0.84187762
  0.25840000   0.41823472
  0.25840000   0.62611006
  0.25840000   0.84858757
  0.25840000   0.89164960
  0.25840000   0.57818421
  0.25840000   0.50833662
  0.25840000   0.93039177
  0.25840000   0.85594309
  0.25840000   0.35225001
  0.25840000   0.58083100
  0.25840000   0.77123491
  0.25840000   0.91776816
  0.25840000   0.72626872
  0.25840000   0.42061961
  0.25840000   0.83308264
  0.25840000   0.82227088
  0.25840000   0.63453912
  0.25840000   0.68413043
  0.25840000   0.91858751
  0.25840000   0.83478741
  0.25840000   0.39761034
  0.25840000   0.63988173
  0.25840000   0.82641275
  0.25840000   0.89187449
  0.25840000   0.62978155
  0.25840000   0.50768245
  0.25840000   0.92030853
  0.25840000   0.85979077
  0.25920000   0.66720564
  0.25920000   0.66354740
  0.25920000   0.90189261
  0.25920000   0.85667722
  0.25920000   0.44410610
  0.25920000   0.59391076
  0.25920000   0.87381875
  0.25920000   0.89229249
  0.25920000   0.51314599
  0.25920000   0.50357492
  0.25920000   0.91550268
  0.25920000   0.85919355
  0.25920000   0.40019054
  0.25920000   0.58092157
  0.25920000   0.83003588
  0.25920000   0.90526426
  0.25920000   0.61686791
  0.25920000   0.46790158
  0.25920000   0.92116581
  0.25920000   0.83499305
  0.25920000   0.38857082
  0.25920000   0.63788644
  0.25920000   0.81622152
  0.25920000   0.89525951
  0.25920000   0.65052725
  0.25920000   0.49714377
  0.25920000   0.90967602
  0.25920000   0.85834149
  0.25920000   0.41900729
  0.25920000   0.58599394
  0.25920000   0.85000934
  0.25920000   0.89979938
  0.25920000   0.57193779
  0.25920000   0.48425628
  0.25920000   0.92840126
  0.25920000   0.84325796
  0.25920000   0.36250875
  0.25920000   0.61405041
  0.25920000   0.78493050
  0.25920000   0.91066079
  0.26000000   0.36270996
  0.26000000   0.60948313
  0.26000000   0.78552510
  0.26000000   0.91190214
  0.26000000   0.70421187
  0.26000000   0.44243736
  0.26000000   0.86141791
  0.26000000   0.83516501
  0.26000000   0.56292897
  0.26000000   0.65576276
  0.26000000   0.93228120
  0.26000000   0.84994067
  0.26000000   0.34841679
  0.26000000   0.59573939
  0.26000000   0.76695189
  0.26000000   0.91802356
  0.26000000   0.73348588
  0.26000000   0.41944506
  0.26000000   0.82439781
  0.26000000   0.82377522
  0.26000000   0.65400092
  0.26000000   0.68066508
  0.26000000   0.90949709
  0.26000000   0.84133432
  0.26000000   0.42517034
  0.26000000   0.62925346
  0.26000000   0.85622663
  0.26000000   0.88888407
  0.26000000   0.56061342
  0.26000000   0.51655322
  0.26000000   0.93057616
  0.26000000   0.85983482
  0.26000000   0.35091930
  0.26000000   0.57117848
  0.26000000   0.76989907
  0.26000000   0.91835417
  0.26000000   0.72844768
  0.26000000   0.41898606
  0.26000000   0.83069312
  0.26000000   0.82165793
  0.26080000   0.40857304
  0.26080000   0.59925895
  0.26080000   0.83995343
  0.26080000   0.90157364
  0.26080000   0.59580049
  0.26080000   0.47991997
  0.26080000   0.92752642
  0.26080000   0.84108185
  0.26080000   0.36643320
  0.26080000   0.62042314
  0.26080000   0.79043261
  0.26080000   0.90815372
  0.26080000   0.69688298
  0.26080000   0.45522675
  0.26080000   0.87059196
  0.26080000   0.84332912
  0.26080000   0.53686298
  0.26080000   0.63572993
  0.26080000   0.92823483
  0.26080000   0.86198655
  0.26080000   0.35863550
  0.26080000   0.56737614
  0.26080000   0.78036175
  0.26080000   0.91643857
  0.26080000   0.71168236
  0.26080000   0.42748261
  0.26080000   0.85178309
  0.26080000   0.82441186
  0.26080000   0.59020104
  0.26080000   0.68082651
  0.26080000   0.93118030
  0.26080000   0.83281410
  0.26080000   0.35706126
  0.26080000   0.63821561
  0.26080000   0.77800879
  0.26080000   0.90383071
  0.26080000   0.72066973
  0.26080000   0.46605419
  0.26080000   0.84653058
  0.26080000   0.85902840
  0.26160000   0.60299376
  0.26160000   0.47208816
  0.26160000   0.92582380
  0.26160000   0.83647511
  0.26160000   0.37347367
  0.26160000   0.63267189
  0.26160000   0.79918517
  0.26160000   0.90202321
  0.26160000   0.68279275
  0.26160000   0.47562138
  0.26160000   0.88584800
  0.26160000   0.85376878
  0.26160000   0.49198095
  0.26160000   0.60710593
  0.26160000   0.90938532
  0.26160000   0.87841844
  0.26160000   0.41440994
  0.26160000   0.53269017
  0.26160000   0.84436893
  0.26160000   0.89462417
  0.26160000   0.58760148
  0.26160000   0.50082317
  0.26160000   0.93052042
  0.26160000   0.85238762
  0.26160000   0.35347984
  0.26160000   0.59087665
  0.26160000   0.77413982
  0.26160000   0.91761012
  0.26160000   0.72195250
  0.26160000   0.42274441
  0.26160000   0.83965224
  0.26160000   0.82337486
  0.26160000   0.61989191
  0.26160000   0.68326506
  0.26160000   0.92526296
  0.26160000   0.83331495
  0.26160000   0.37693926
  0.26160000   0.64084412
  0.26160000   0.80336523
  0.26160000   0.89762560
  0.26240000   0.59017281
  0.26240000   0.48323490
  0.26240000   0.92900311
  0.26240000   0.84277313
  0.26240000   0.36138904
  0.26240000   0.61596428
  0.26240000   0.78463644
  0.26240000   0.91110823
  0.26240000   0.70647289
  0.26240000   0.44554082
  0.26240000   0.86030505
  0.26240000   0.83873066
  0.26240000   0.56545608
  0.26240000   0.64847705
  0.26240000   0.93379678
  0.26240000   0.85379371
  0.26240000   0.34270948
  0.26240000   0.58578799
  0.26240000   0.76000571
  0.26240000   0.92086757
  0.26240000   0.74358619
  0.26240000   0.40953790
  0.26240000   0.81017069
  0.26240000   0.81764367
  0.26240000   0.68613143
  0.26240000   0.69248228
  0.26240000   0.88593323
  0.26240000   0.83981215
  0.26240000   0.49661096
  0.26240000   0.64203667
  0.26240000   0.91170205
  0.26240000   0.86565761
  0.26240000   0.41158384
  0.26240000   0.56716067
  0.26240000   0.84334885
  0.26240000   0.90222412
  0.26240000   0.58773495
  0.26240000   0.47845739
  0.26240000   0.92877626
  0.26240000   0.83977797
  0.26320000   0.51275016
  0.26320000   0.50281162
  0.26320000   0.91658159
  0.26320000   0.85879041
  0.26320000   0.39761532
  0.26320000   0.58275581
  0.26320000   0.82862519
  0.26320000   0.90649217
  0.26320000   0.62013476
  0.26320000   0.46549724
  0.26320000   0.92126127
  0.26320000   0.83364377
  0.26320000   0.38954702
  0.26320000   0.64237174
  0.26320000   0.81859814
  0.26320000   0.89355825
  0.26320000   0.64675855
  0.26320000   0.50377628
  0.26320000   0.91374508
  0.26320000   0.86091037
  0.26320000   0.40631209
  0.26320000   0.57880535
  0.26320000   0.83818483
  0.26320000   0.90414189
  0.26320000   0.59926751
  0.26320000   0.47292905
  0.26320000   0.92709755
  0.26320000   0.83671301
  0.26320000   0.36954432
  0.26320000   0.63190336
  0.26320000   0.79488930
  0.26320000   0.90368735
  0.26320000   0.69059924
  0.26320000   0.47042170
  0.26320000   0.87903568
  0.26320000   0.85266910
  0.26320000   0.51179930
  0.26320000   0.61212590
  0.26320000   0.92026325
  0.26320000   0.87343904
  0.26400000   0.36416366
  0.26400000   0.57538912
  0.26400000   0.78888023
  0.26400000   0.91606882
  0.26400000   0.69714949
  0.26400000   0.43132005
  0.26400000   0.86834153
  0.26400000   0.82371876
  0.26400000   0.54868181
  0.26400000   0.68231172
  0.26400000   0.92955587
  0.26400000   0.83244095
  0.26400000   0.36333552
  0.26400000   0.64111824
  0.26400000   0.78716551
  0.26400000   0.90156543
  0.26400000   0.70588025
  0.26400000   0.47574464
  0.26400000   0.86509370
  0.26400000   0.86113675
  0.26400000   0.54721475
  0.26400000   0.59328533
  0.26400000   0.93276056
  0.26400000   0.87218603
  0.26400000   0.34086661
  0.26400000   0.53795142
  0.26400000   0.75647377
  0.26400000   0.91628177
  0.26400000   0.75071124
  0.26400000   0.42364837
  0.26400000   0.80259753
  0.26400000   0.83420840
  0.26400000   0.69752355
  0.26400000   0.65548818
  0.26400000   0.87883358
  0.26400000   0.87054456
  0.26400000   0.50791996
  0.26400000   0.56617316
  0.26400000   0.91854708
  0.26400000   0.87801823
  0.26480000   0.63075609
  0.26480000   0.46048486
  0.26480000   0.91740303
  0.26480000   0.83156018
  0.26480000   0.40297407
  0.26480000   0.64979099
  0.26480000   0.83392606
  0.26480000   0.88619878
  0.26480000   0.61581869
  0.26480000   0.52663271
  0.26480000   0.92870312
  0.26480000   0.86525500
  0.26480000   0.35666992
  0.26480000   0.55957459
  0.26480000   0.77896161
  0.26480000   0.91697423
  0.26480000   0.71436118
  0.26480000   0.42676320
  0.26480000   0.85002566
  0.26480000   0.82508474
  0.26480000   0.59535622
  0.26480000   0.68085812
  0.26480000   0.93201587
  0.26480000   0.83290577
  0.26480000   0.35519428
  0.26480000   0.63883592
  0.26480000   0.77697923
  0.26480000   0.90490602
  0.26480000   0.72264897
  0.26480000   0.46384172
  0.26480000   0.84532730
  0.26480000   0.85861214
  0.26480000   0.59780391
  0.26480000   0.60141368
  0.26480000   0.93508125
  0.26480000   0.87038938
  0.26480000   0.33381382
  0.26480000   0.54169515
  0.26480000   0.74714733
  0.26480000   0.91909501
  0.26560000   0.33859686
  0.26560000   0.55085936
  0.26560000   0.75457807
  0.26560000   0.92025476
  0.26560000   0.75232139
  0.26560000   0.41113767
  0.26560000   0.79895785
  0.26560000   0.82278605
  0.26560000   0.70792390
  0.26560000   0.68042590
  0.26560000   0.86719534
  0.26560000   0.85699246
  0.26560000   0.54401139
  0.26560000   0.60463683
  0.26560000   0.93283023
  0.26560000   0.87079838
  0.26560000   0.34156123
  0.26560000   0.54237279
  0.26560000   0.75832888
  0.26560000   0.91773077
  0.26560000   0.74765162
  0.26560000   0.42004977
  0.26560000   0.80705533
  0.26560000   0.83007075
  0.26560000   0.69017719
  0.26560000   0.66615515
  0.26560000   0.88563251
  0.26560000   0.86168621
  0.26560000   0.49190108
  0.26560000   0.58870665
  0.26560000   0.91104763
  0.26560000   0.88124092
  0.26560000   0.40914612
  0.26560000   0.52539507
  0.26560000   0.83996000
  0.26560000   0.89428851
  0.26560000   0.59887529
  0.26560000   0.50341591
  0.26560000   0.93094027
  0.26560000   0.85409937
  0.26640000   0.50950184
  0.26640000   0.50087762
  0.26640000   0.91617029
  0.26640000   0.85844746
  0.26640000   0.39979505
  0.26640000   0.58505169
  0.26640000   0.83231364
  0.26640000   0.90627042
  0.26640000   0.61246965
  0.26640000   0.46751171
  0.26640000   0.92486611
  0.26640000   0.83412347
  0.26640000   0.37840914
  0.26640000   0.64040962
  0.26640000   0.80667149
  0.26640000   0.89818840
  0.26640000   0.67026323
  0.26640000   0.48985324
  0.26640000   0.89881402
  0.26640000   0.85921518
  0.26640000   0.45354848
  0.26640000   0.59083086
  0.26640000   0.88422287
  0.26640000   0.89041577
  0.26640000   0.48604212
  0.26640000   0.50916568
  0.26640000   0.90398163
  0.26640000   0.86710234
  0.26640000   0.43522467
  0.26640000   0.56777305
  0.26640000   0.86783779
  0.26640000   0.89574886
  0.26640000   0.52891504
  0.26640000   0.49696685
  0.26640000   0.92367082
  0.26640000   0.85335051
  0.26640000   0.37692442
  0.26640000   0.59406101
  0.26640000   0.80574265
  0.26640000   0.91203839
  0.26720000   0.54871219
  0.26720000   0.51266495
  0.26720000   0.93082246
  0.26720000   0.85867932
  0.26720000   0.35189357
  0.26720000   0.57637680
  0.26720000   0.77395205
  0.26720000   0.91989156
  0.26720000   0.72210392
  0.26720000   0.41722437
  0.26720000   0.84052572
  0.26720000   0.81890818
  0.26720000   0.62036933
  0.26720000   0.69494425
  0.26720000   0.92599981
  0.26720000   0.82334811
  0.26720000   0.37849260
  0.26720000   0.66509748
  0.26720000   0.80594951
  0.26720000   0.88445971
  0.26720000   0.67685742
  0.26720000   0.52983959
  0.26720000   0.89740396
  0.26720000   0.87892567
  0.26720000   0.45199289
  0.26720000   0.53840968
  0.26720000   0.88171255
  0.26720000   0.88625673
  0.26720000   0.49454664
  0.26720000   0.52223442
  0.26720000   0.91027905
  0.26720000   0.87060263
  0.26720000   0.41487869
  0.26720000   0.55580688
  0.26720000   0.84795654
  0.26720000   0.90043734
  0.26720000   0.57785064
  0.26720000   0.48536791
  0.26720000   0.93144604
  0.26720000   0.84360374
  0.26800000   0.47173554
  0.26800000   0.52631581
  0.26800000   0.89623284
  0.26800000   0.87731165
  0.26800000   0.45562636
  0.26800000   0.54335120
  0.26800000   0.88502329
  0.26800000   0.88642263
  0.26800000   0.48516499
  0.26800000   0.52104969
  0.26800000   0.90481522
  0.26800000   0.87218113
  0.26800000   0.43137361
  0.26800000   0.55416326
  0.26800000   0.86436430
  0.26800000   0.89539519
  0.26800000   0.53836252
  0.26800000   0.49914111
  0.26800000   0.92736338
  0.26800000   0.85325849
  0.26800000   0.36509511
  0.26800000   0.59266547
  0.26800000   0.79157598
  0.26800000   0.91575457
  0.26800000   0.69280182
  0.26800000   0.43407044
  0.26800000   0.87411979
  0.26800000   0.82514481
  0.26800000   0.53374679
  0.26800000   0.67981038
  0.26800000   0.92721096
  0.26800000   0.83579294
  0.26800000   0.37118833
  0.26800000   0.63600461
  0.26800000   0.79872333
  0.26800000   0.90256814
  0.26800000   0.68458658
  0.26800000   0.47612243
  0.26800000   0.88668086
  0.26800000   0.85499959
  0.26880000   0.68452186
  0.26880000   0.43734652
  0.26880000   0.88224129
  0.26880000   0.82561826
  0.26880000   0.51141038
  0.26880000   0.67752343
  0.26880000   0.91904727
  0.26880000   0.84091036
  0.26880000   0.39674298
  0.26880000   0.62866567
  0.26880000   0.82955907
  0.26880000   0.89837703
  0.26880000   0.62218339
  0.26880000   0.49238605
  0.26880000   0.92547795
  0.26880000   0.85076296
  0.26880000   0.37250160
  0.26880000   0.60056744
  0.26880000   0.80130030
  0.26880000   0.91287947
  0.26880000   0.67570721
  0.26880000   0.44504972
  0.26880000   0.89046861
  0.26880000   0.82960220
  0.26880000   0.48688717
  0.26880000   0.66646929
  0.26880000   0.90664491
  0.26880000   0.85373658
  0.26880000   0.43217617
  0.26880000   0.60279665
  0.26880000   0.86647976
  0.26880000   0.89503740
  0.26880000   0.53339463
  0.26880000   0.50035607
  0.26880000   0.92639481
  0.26880000   0.85450126
  0.26880000   0.36821198
  0.26880000   0.59041394
  0.26880000   0.79586295
  0.26880000   0.91532287
  0.26960000   0.62116543
  0.26960000   0.47267048
  0.26960000   0.92395857
  0.26960000   0.83857867
  0.26960000   0.38096458
  0.26960000   0.63150996
  0.26960000   0.81125244
  0.26960000   0.90188665
  0.26960000   0.66012300
  0.26960000   0.48048034
  0.26960000   0.90596714
  0.26960000   0.85111020
  0.26960000   0.43483844
  0.26960000   0.60983412
  0.26960000   0.86908487
  0.26960000   0.89282305
  0.26960000   0.52737209
  0.26960000   0.50675485
  0.26960000   0.92518166
  0.26960000   0.85832992
  0.26960000   0.37124351
  0.26960000   0.58149362
  0.26960000   0.79984631
  0.26960000   0.91513534
  0.26960000   0.67763142
  0.26960000   0.43793841
  0.26960000   0.88823131
  0.26960000   0.82416482
  0.26960000   0.49489430
  0.26960000   0.67953180
  0.26960000   0.91062069
  0.26960000   0.84256601
  0.26960000   0.42322706
  0.26960000   0.62906088
  0.26960000   0.85770618
  0.26960000   0.89044566
  0.26960000   0.55791622
  0.26960000   0.51540383
  0.26960000   0.93356741
  0.26960000   0.85908727
  0.27040000   0.61102330
  0.27040000   0.47022396
  0.27040000   0.92691299
  0.27040000   0.83571000
  0.27040000   0.37215977
  0.27040000   0.63687051
  0.27040000   0.80059614
  0.27040000   0.90228468
  0.27040000   0.68135302
  0.27040000   0.47804041
  0.27040000   0.89040491
  0.27040000   0.85536263
  0.27040000   0.48034125
  0.27040000   0.60507273
  0.27040000   0.90542345
  0.27040000   0.88155295
  0.27040000   0.42727750
  0.27040000   0.52871201
  0.27040000   0.86015784
  0.27040000   0.89059753
  0.27040000   0.55132997
  0.27040000   0.51479707
  0.27040000   0.93259316
  0.27040000   0.85917631
  0.27040000   0.34638807
  0.27040000   0.57493452
  0.27040000   0.76765333
  0.27040000   0.92195302
  0.27040000   0.73198598
  0.27040000   0.41019356
  0.27040000   0.82827976
  0.27040000   0.81572906
  0.27040000   0.64999922
  0.27040000   0.70178640
  0.27040000   0.91337982
  0.27040000   0.82216082
  0.27040000   0.42054629
  0.27040000   0.67550084
  0.27040000   0.85287912
  0.27040000   0.86541060
  0.27120000   0.67600881
  0.27120000   0.69164914
  0.27120000   0.89736411
  0.27120000   0.83805454
  0.27120000   0.46580620
  0.27120000   0.64605361
  0.27120000   0.89463858
  0.27120000   0.87107036
  0.27120000   0.46363343
  0.27120000   0.56272496
  0.27120000   0.89347131
  0.27120000   0.88779743
  0.27120000   0.46110548
  0.27120000   0.51569307
  0.27120000   0.88888304
  0.27120000   0.87623537
  0.27120000   0.47810871
  0.27120000   0.55004165
  0.27120000   0.90310104
  0.27120000   0.88211506
  0.27120000   0.43408402
  0.27120000   0.52826160
  0.27120000   0.86676406
  0.27120000   0.88847457
  0.27120000   0.53497823
  0.27120000   0.52033746
  0.27120000   0.92921702
  0.27120000   0.86293188
  0.27120000   0.35675535
  0.27120000   0.56743619
  0.27120000   0.78159800
  0.27120000   0.91907352
  0.27120000   0.70978405
  0.27120000   0.42267046
  0.27120000   0.85655898
  0.27120000   0.82047580
  0.27120000   0.58181409
  0.27120000   0.69305024
  0.27120000   0.93414989
  0.27120000   0.82205746
  0.27200000   0.35538689
  0.27200000   0.60948645
  0.27200000   0.78041568
  0.27200000   0.91638188
  0.27200000   0.71317290
  0.27200000   0.43128155
  0.27200000   0.85440883
  0.27200000   0.82967880
  0.27200000   0.58510554
  0.27200000   0.67322939
  0.27200000   0.93608843
  0.27200000   0.83793434
  0.27200000   0.34166828
  0.27200000   0.62670995
  0.27200000   0.76176708
  0.27200000   0.91492190
  0.27200000   0.74461534
  0.27200000   0.43169169
  0.27200000   0.81519859
  0.27200000   0.84112489
  0.27200000   0.67210078
  0.27200000   0.64444983
  0.27200000   0.90403280
  0.27200000   0.86918238
  0.27200000   0.43645869
  0.27200000   0.56467437
  0.27200000   0.87123096
  0.27200000   0.89574774
  0.27200000   0.52097680
  0.27200000   0.49857642
  0.27200000   0.92297208
  0.27200000   0.85526537
  0.27200000   0.37995249
  0.27200000   0.59155194
  0.27200000   0.81151698
  0.27200000   0.91246943
  0.27200000   0.65583421
  0.27200000   0.44876696
  0.27200000   0.90578059
  0.27200000   0.82759857
  0.27280000   0.76852336
  0.27280000   0.39410132
  0.27280000   0.77343459
  0.27280000   0.81160964
  0.27280000   0.75834009
  0.27280000   0.69911751
  0.27280000   0.80293785
  0.27280000   0.85958375
  0.27280000   0.69269336
  0.27280000   0.59797917
  0.27280000   0.88846533
  0.27280000   0.89040254
  0.27280000   0.47576092
  0.27280000   0.51073590
  0.27280000   0.89998245
  0.27280000   0.87052916
  0.27280000   0.44775442
  0.27280000   0.56259760
  0.27280000   0.88121985
  0.27280000   0.89221840
  0.27280000   0.49488401
  0.27280000   0.50702760
  0.27280000   0.91136726
  0.27280000   0.86423313
  0.27280000   0.41456850
  0.27280000   0.57446013
  0.27280000   0.85026585
  0.27280000   0.90280449
  0.27280000   0.57228682
  0.27280000   0.48014706
  0.27280000   0.93280165
  0.27280000   0.84026530
  0.27280000   0.35167608
  0.27280000   0.62313929
  0.27280000   0.77552187
  0.27280000   0.91367729
  0.27280000   0.72277073
  0.27280000   0.43898500
  0.27280000   0.84472012
  0.27280000   0.83989349
  0.27360000   0.38264303
  0.27360000   0.56100960
  0.27360000   0.81474203
  0.27360000   0.91162784
  0.27360000   0.64960945
  0.27360000   0.45228013
  0.27360000   0.91038160
  0.27360000   0.82895088
  0.27360000   0.42810792
  0.27360000   0.66234517
  0.27360000   0.86210082
  0.27360000   0.87245890
  0.27360000   0.55351644
  0.27360000   0.56717368
  0.27360000   0.93707787
  0.27360000   0.87167848
  0.27360000   0.32806783
  0.27360000   0.53939940
  0.27360000   0.74199644
  0.27360000   0.92199212
  0.27360000   0.77043605
  0.27360000   0.40463476
  0.27360000   0.77224307
  0.27360000   0.82373622
  0.27360000   0.75747267
  0.27360000   0.67383462
  0.27360000   0.80682752
  0.27360000   0.88077564
  0.27360000   0.67816791
  0.27360000   0.54269424
  0.27360000   0.89965288
  0.27360000   0.88314780
  0.27360000   0.44521238
  0.27360000   0.52797227
  0.27360000   0.87779182
  0.27360000   0.88545922
  0.27360000   0.50687806
  0.27360000   0.52792248
  0.27360000   0.91953159
  0.27360000   0.87004927
  0.27440000   0.70422988
  0.27440000   0.45927027
  0.27440000   0.86858734
  0.27440000   0.85001072
  0.27440000   0.54354463
  0.27440000   0.62497074
  0.27440000   0.93541413
  0.27440000   0.86490123
  0.27440000   0.33635847
  0.27440000   0.55945313
  0.27440000   0.75503267
  0.27440000   0.92432231
  0.27440000   0.75114914
  0.27440000   0.40080022
  0.27440000   0.80188285
  0.27440000   0.81337646
  0.27440000   0.70682578
  0.27440000   0.70349018
  0.27440000   0.86916656
  0.27440000   0.83705329
  0.27440000   0.54657259
  0.27440000   0.65646894
  0.27440000   0.93500475
  0.27440000   0.85017971
  0.27440000   0.34252042
  0.27440000   0.59825834
  0.27440000   0.76434842
  0.27440000   0.92258620
  0.27440000   0.73780370
  0.27440000   0.40876245
  0.27440000   0.82187538
  0.27440000   0.81705229
  0.27440000   0.66486732
  0.27440000   0.69965572
  0.27440000   0.90583971
  0.27440000   0.82786463
  0.27440000   0.44371212
  0.27440000   0.66764796
  0.27440000   0.87664201
  0.27440000   0.86461796
  0.27520000   0.66715035
  0.27520000   0.46291570
  0.27520000   0.90118106
  0.27520000   0.84122680
  0.27520000   0.45350633
  0.27520000   0.63811248
  0.27520000   0.88657655
  0.27520000   0.87823987
  0.27520000   0.48524254
  0.27520000   0.54682542
  0.27520000   0.90914560
  0.27520000   0.87982432
  0.27520000   0.41704240
  0.27520000   0.53353873
  0.27520000   0.85204366
  0.27520000   0.89565026
  0.27520000   0.57077409
  0.27520000   0.50244531
  0.27520000   0.93569237
  0.27520000   0.85246003
  0.27520000   0.33888308
  0.27520000   0.59177340
  0.27520000   0.75931861
  0.27520000   0.92429872
  0.27520000   0.74477927
  0.27520000   0.40213953
  0.27520000   0.81142606
  0.27520000   0.81268352
  0.27520000   0.68804999
  0.27520000   0.70711636
  0.27520000   0.88708936
  0.27520000   0.82729436
  0.27520000   0.49979390
  0.27520000   0.67553645
  0.27520000   0.91596731
  0.27520000   0.84472060
  0.27520000   0.40719420
  0.27520000   0.62339308
  0.27520000   0.84356961
  0.27520000   0.89800704
  0.27600000   0.81301551
  0.27600000   0.69930476
  0.27600000   0.70565840
  0.27600000   0.87712535
  0.27600000   0.83250867
  0.27600000   0.52666205
  0.27600000   0.66631827
  0.27600000   0.92909001
  0.27600000   0.84637731
  0.27600000   0.36402486
  0.27600000   0.61217535
  0.27600000   0.79338097
  0.27600000   0.91437909
  0.27600000   0.69140725
  0.27600000   0.44157903
  0.27600000   0.87927631
  0.27600000   0.83187848
  0.27600000   0.51993113
  0.27600000   0.66686833
  0.27600000   0.92617863
  0.27600000   0.84693242
  0.27600000   0.37338644
  0.27600000   0.61246105
  0.27600000   0.80506383
  0.27600000   0.91154782
  0.27600000   0.66997692
  0.27600000   0.45231115
  0.27600000   0.89823337
  0.27600000   0.83414709
  0.27600000   0.46459904
  0.27600000   0.65629079
  0.27600000   0.89466184
  0.27600000   0.86586256
  0.27600000   0.46611193
  0.27600000   0.57849538
  0.27600000   0.89746490
  0.27600000   0.88800432
  0.27600000   0.45009497
  0.27600000   0.51537186
  0.27600000   0.88176777
  0.27680000   0.74533810
  0.27680000   0.41628720
  0.27680000   0.81341016
  0.27680000   0.82761364
  0.27680000   0.68058798
  0.27680000   0.67638386
  0.27680000   0.89705799
  0.27680000   0.85199176
  0.27680000   0.46396757
  0.27680000   0.61421265
  0.27680000   0.89634905
  0.27680000   0.88394027
  0.27680000   0.45521516
  0.27680000   0.52802402
  0.27680000   0.88722502
  0.27680000   0.88272637
  0.27680000   0.48182900
  0.27680000   0.53438794
  0.27680000   0.90683193
  0.27680000   0.87753239
  0.27680000   0.42521950
  0.27680000   0.54163106
  0.27680000   0.86119353
  0.27680000   0.89549199
  0.27680000   0.54800413
  0.27680000   0.50261451
  0.27680000   0.93323690
  0.27680000   0.85368463
  0.27680000   0.34720935
  0.27680000   0.59081818
  0.27680000   0.77132810
  0.27680000   0.92262690
  0.27680000   0.72658577
  0.27680000   0.41087695
  0.27680000   0.83725265
  0.27680000   0.81549510
  0.27680000   0.63132614
  0.27680000   0.70537317
  0.27680000   0.92417415
  0.27680000   0.81500238
  0.27760000   0.62127868
  0.27760000   0.47351788
  0.27760000   0.92685739
  0.27760000   0.83896091
  0.27760000   0.37321179
  0.27760000   0.63171004
  0.27760000   0.80474756
  0.27760000   0.90550724
  0.27760000   0.67312041
  0.27760000   0.47139625
  0.27760000   0.89872263
  0.27760000   0.84888147
  0.27760000   0.45931600
  0.27760000   0.62127543
  0.27760000   0.89268699
  0.27760000   0.88309913
  0.27760000   0.46631975
  0.27760000   0.53196690
  0.27760000   0.89627983
  0.27760000   0.88087592
  0.27760000   0.45618045
  0.27760000   0.53685866
  0.27760000   0.88868412
  0.27760000   0.88507379
  0.27760000   0.47688750
  0.27760000   0.52742750
  0.27760000   0.90337103
  0.27760000   0.87657407
  0.27760000   0.43623916
  0.27760000   0.54609281
  0.27760000   0.87206193
  0.27760000   0.89319167
  0.27760000   0.52032117
  0.27760000   0.50795645
  0.27760000   0.92541686
  0.27760000   0.85965116
  0.27760000   0.37170452
  0.27760000   0.58057835
  0.27760000   0.80333254
  0.27760000   0.91648172
  0.27840000   0.90150707
  0.27840000   0.86888093
  0.27840000   0.44474360
  0.27840000   0.56847647
  0.27840000   0.88085861
  0.27840000   0.89387714
  0.27840000   0.49623751
  0.27840000   0.50427418
  0.27840000   0.91390644
  0.27840000   0.86260794
  0.27840000   0.40821720
  0.27840000   0.57950572
  0.27840000   0.84578197
  0.27840000   0.90542143
  0.27840000   0.58307682
  0.27840000   0.47444382
  0.27840000   0.93418571
  0.27840000   0.83642416
  0.27840000   0.34937638
  0.27840000   0.63329190
  0.27840000   0.77415233
  0.27840000   0.91172673
  0.27840000   0.72665585
  0.27840000   0.44649248
  0.27840000   0.84293280
  0.27840000   0.84831550
  0.27840000   0.60948464
  0.27840000   0.63205619
  0.27840000   0.93725898
  0.27840000   0.86201622
  0.27840000   0.33188106
  0.27840000   0.56720890
  0.27840000   0.75045724
  0.27840000   0.92719999
  0.27840000   0.75718053
  0.27840000   0.39148668
  0.27840000   0.79261453
  0.27840000   0.80614662
  0.27840000   0.72730202
  0.27840000   0.71691050
  0.27920000   0.92864504
  0.27920000   0.82398616
  0.27920000   0.37260432
  0.27920000   0.66635493
  0.27920000   0.80296012
  0.27920000   0.88756766
  0.27920000   0.68388135
  0.27920000   0.52463784
  0.27920000   0.89573576
  0.27920000   0.87966065
  0.27920000   0.45899707
  0.27920000   0.54139328
  0.27920000   0.89193260
  0.27920000   0.88562115
  0.27920000   0.46772408
  0.27920000   0.52547631
  0.27920000   0.89745439
  0.27920000   0.87840906
  0.27920000   0.45381135
  0.27920000   0.54397790
  0.27920000   0.88774912
  0.27920000   0.88761394
  0.27920000   0.47899629
  0.27920000   0.52097040
  0.27920000   0.90493943
  0.27920000   0.87377404
  0.27920000   0.43268990
  0.27920000   0.55378961
  0.27920000   0.86973117
  0.27920000   0.89585771
  0.27920000   0.52589882
  0.27920000   0.50108408
  0.27920000   0.92755435
  0.27920000   0.85547233
  0.27920000   0.36625486
  0.27920000   0.59068155
  0.27920000   0.79718977
  0.27920000   0.91782206
  0.27920000   0.68296455
  0.27920000   0.43226073
  0.28000000   0.92574069
  0.28000000   0.75000553
  0.28000000   0.39809070
  0.28000000   0.80488310
  0.28000000   0.81114864
  0.28000000   0.70292983
  0.28000000   0.71042723
  0.28000000   0.87426347
  0.28000000   0.82918420
  0.28000000   0.53638075
  0.28000000   0.67590249
  0.28000000   0.93294607
  0.28000000   0.83819378
  0.28000000   0.35435863
  0.28000000   0.63098798
  0.28000000   0.78178659
  0.28000000   0.91184261
  0.28000000   0.71398655
  0.28000000   0.44849696
  0.28000000   0.85870187
  0.28000000   0.84559648
  0.28000000   0.57185782
  0.28000000   0.63895124
  0.28000000   0.94114103
  0.28000000   0.85736755
  0.28000000   0.32022520
  0.28000000   0.57713779
  0.28000000   0.73445573
  0.28000000   0.93073701
  0.28000000   0.77783512
  0.28000000   0.37618462
  0.28000000   0.75701048
  0.28000000   0.79581591
  0.28000000   0.79012763
  0.28000000   0.72608498
  0.28000000   0.74862815
  0.28000000   0.84302068
  0.28000000   0.79142790
  0.28000000   0.62568151
  0.28000000   0.75486657
  0.28080000   0.84438130
  0.28080000   0.34861673
  0.28080000   0.61508920
  0.28080000   0.77456639
  0.28080000   0.91873402
  0.28080000   0.72343537
  0.28080000   0.42537423
  0.28080000   0.84466782
  0.28080000   0.82897143
  0.28080000   0.61137761
  0.28080000   0.67813601
  0.28080000   0.93489025
  0.28080000   0.83570909
  0.28080000   0.34859698
  0.28080000   0.63581345
  0.28080000   0.77414642
  0.28080000   0.91156232
  0.28080000   0.72725939
  0.28080000   0.44784293
  0.28080000   0.84327234
  0.28080000   0.85000815
  0.28080000   0.60878514
  0.28080000   0.62885403
  0.28080000   0.93845336
  0.28080000   0.86305226
  0.28080000   0.32796246
  0.28080000   0.56438316
  0.28080000   0.74568580
  0.28080000   0.92851813
  0.28080000   0.76370133
  0.28080000   0.38664704
  0.28080000   0.78243624
  0.28080000   0.80349272
  0.28080000   0.74701169
  0.28080000   0.71991912
  0.28080000   0.81984732
  0.28080000   0.83523561
  0.28080000   0.66709316
  0.28080000   0.66219966
  0.28080000   0.91016199
  0.28160000   0.80454944
  0.28160000   0.70893935
  0.28160000   0.72356756
  0.28160000   0.86682914
  0.28160000   0.81707054
  0.28160000   0.55998743
  0.28160000   0.70406416
  0.28160000   0.93576890
  0.28160000   0.81203956
  0.28160000   0.35227637
  0.28160000   0.68860687
  0.28160000   0.77572501
  0.28160000   0.87670703
  0.28160000   0.73794725
  0.28160000   0.54942596
  0.28160000   0.83932803
  0.28160000   0.90637984
  0.28160000   0.59924882
  0.28160000   0.47320703
  0.28160000   0.93385203
  0.28160000   0.83637562
  0.28160000   0.35152396
  0.28160000   0.63489035
  0.28160000   0.77826377
  0.28160000   0.91126569
  0.28160000   0.72044473
  0.28160000   0.44994560
  0.28160000   0.85201250
  0.28160000   0.84925301
  0.28160000   0.58792742
  0.28160000   0.63095660
  0.28160000   0.94181435
  0.28160000   0.86072612
  0.28160000   0.31714658
  0.28160000   0.56829827
  0.28160000   0.73029949
  0.28160000   0.93150503
  0.28160000   0.78293912
  0.28160000   0.37296488
  0.28160000   0.74799296
  0.28240000   0.34109624
  0.28240000   0.60588481
  0.28240000   0.76506352
  0.28240000   0.92333008
  0.28240000   0.73722771
  0.28240000   0.40890600
  0.28240000   0.82518893
  0.28240000   0.81823579
  0.28240000   0.65935759
  0.28240000   0.70032758
  0.28240000   0.91210617
  0.28240000   0.82586957
  0.28240000   0.42669216
  0.28240000   0.67230914
  0.28240000   0.86344866
  0.28240000   0.86712738
  0.28240000   0.55377721
  0.28240000   0.58484131
  0.28240000   0.94087944
  0.28240000   0.87134013
  0.28240000   0.31692439
  0.28240000   0.54041834
  0.28240000   0.72909941
  0.28240000   0.92711998
  0.28240000   0.78626789
  0.28240000   0.38711174
  0.28240000   0.74481991
  0.28240000   0.81176380
  0.28240000   0.80464436
  0.28240000   0.69187024
  0.28240000   0.72581526
  0.28240000   0.88383825
  0.28240000   0.80873090
  0.28240000   0.51584125
  0.28240000   0.71901722
  0.28240000   0.92159868
  0.28240000   0.80176645
  0.28240000   0.40237441
  0.28240000   0.71863683
  0.28240000   0.83337281
  0.28320000   0.72788468
  0.28320000   0.93270886
  0.28320000   0.78566491
  0.28320000   0.36880623
  0.28320000   0.74286944
  0.28320000   0.79016304
  0.28320000   0.81272204
  0.28320000   0.73208065
  0.28320000   0.70470686
  0.28320000   0.84284693
  0.28320000   0.84611611
  0.28320000   0.61254527
  0.28320000   0.63966260
  0.28320000   0.93832296
  0.28320000   0.85903651
  0.28320000   0.33045657
  0.28320000   0.57606924
  0.28320000   0.75055790
  0.28320000   0.92924574
  0.28320000   0.75688303
  0.28320000   0.38630964
  0.28320000   0.79374069
  0.28320000   0.80128745
  0.28320000   0.72772615
  0.28320000   0.72807482
  0.28320000   0.84513630
  0.28320000   0.81888421
  0.28320000   0.61474218
  0.28320000   0.70156650
  0.28320000   0.93290455
  0.28320000   0.81624970
  0.28320000   0.36154311
  0.28320000   0.68218785
  0.28320000   0.78914458
  0.28320000   0.87988512
  0.28320000   0.71360973
  0.28320000   0.54462957
  0.28320000   0.86943234
  0.28320000   0.89610652
  0.28320000   0.52801217
  0.28400000   0.51007216
  0.28400000   0.51780331
  0.28400000   0.92413628
  0.28400000   0.86548614
  0.28400000   0.37549026
  0.28400000   0.56811534
  0.28400000   0.81015799
  0.28400000   0.91619285
  0.28400000   0.65869561
  0.28400000   0.44103336
  0.28400000   0.90703843
  0.28400000   0.82214060
  0.28400000   0.44292601
  0.28400000   0.68293555
  0.28400000   0.87770761
  0.28400000   0.85401386
  0.28400000   0.51997842
  0.28400000   0.61705125
  0.28400000   0.93143973
  0.28400000   0.87008061
  0.28400000   0.35005219
  0.28400000   0.55116021
  0.28400000   0.77699709
  0.28400000   0.92161954
  0.28400000   0.71836778
  0.28400000   0.41768901
  0.28400000   0.85048500
  0.28400000   0.82020227
  0.28400000   0.60035385
  0.28400000   0.69856469
  0.28400000   0.93625421
  0.28400000   0.81738889
  0.28400000   0.34972600
  0.28400000   0.67752001
  0.28400000   0.77410846
  0.28400000   0.88693383
  0.28400000   0.73736357
  0.28400000   0.52148852
  0.28400000   0.83920474
  0.28400000   0.89842488
  0.28480000   0.36646613
  0.28480000   0.53443566
  0.28480000   0.79781592
  0.28480000   0.91296076
  0.28480000   0.68438106
  0.28480000   0.44958593
  0.28480000   0.88941252
  0.28480000   0.83654695
  0.28480000   0.49191920
  0.28480000   0.65681910
  0.28480000   0.91603230
  0.28480000   0.85862129
  0.28480000   0.40463834
  0.28480000   0.59145651
  0.28480000   0.84459331
  0.28480000   0.90673132
  0.28480000   0.58652453
  0.28480000   0.47289316
  0.28480000   0.93613736
  0.28480000   0.83519475
  0.28480000   0.34462727
  0.28480000   0.63704274
  0.28480000   0.76990675
  0.28480000   0.91284875
  0.28480000   0.73415433
  0.28480000   0.44397012
  0.28480000   0.83529779
  0.28480000   0.84990345
  0.28480000   0.62832326
  0.28480000   0.63016166
  0.28480000   0.93384529
  0.28480000   0.86501603
  0.28480000   0.34398304
  0.28480000   0.56369294
  0.28480000   0.76961529
  0.28480000   0.92531168
  0.28480000   0.72930254
  0.28480000   0.40434597
  0.28480000   0.83545237
  0.28480000   0.81098397
  0.28560000   0.79029502
  0.28560000   0.83034446
  0.28560000   0.72727409
  0.28560000   0.66800926
  0.28560000   0.85314600
  0.28560000   0.87517841
  0.28560000   0.57840634
  0.28560000   0.56541527
  0.28560000   0.94391343
  0.28560000   0.86999640
  0.28560000   0.30746090
  0.28560000   0.54282983
  0.28560000   0.71624823
  0.28560000   0.93063309
  0.28560000   0.80040314
  0.28560000   0.37302068
  0.28560000   0.71677915
  0.28560000   0.80013630
  0.28560000   0.84380304
  0.28560000   0.70512697
  0.28560000   0.63978362
  0.28560000   0.87993062
  0.28560000   0.88274265
  0.28560000   0.50497316
  0.28560000   0.54014303
  0.28560000   0.92396938
  0.28560000   0.87377028
  0.28560000   0.37381640
  0.28560000   0.54623869
  0.28560000   0.80795148
  0.28560000   0.91391298
  0.28560000   0.66430279
  0.28560000   0.44852072
  0.28560000   0.90494500
  0.28560000   0.82975912
  0.28560000   0.44775101
  0.28560000   0.66736612
  0.28560000   0.88380187
  0.28560000   0.86412920
  0.28560000   0.50001940
  0.28640000   0.87205199
  0.28640000   0.39213695
  0.28640000   0.55435688
  0.28640000   0.83029466
  0.28640000   0.90969322
  0.28640000   0.61853807
  0.28640000   0.46409224
  0.28640000   0.92969404
  0.28640000   0.83182800
  0.28640000   0.36782943
  0.28640000   0.64978704
  0.28640000   0.80033950
  0.28640000   0.90021785
  0.28640000   0.68519797
  0.28640000   0.48960120
  0.28640000   0.89406592
  0.28640000   0.86410600
  0.28640000   0.47036523
  0.28640000   0.58716622
  0.28640000   0.90448834
  0.28640000   0.88662639
  0.28640000   0.43122548
  0.28640000   0.52020731
  0.28640000   0.86916416
  0.28640000   0.88768840
  0.28640000   0.53158705
  0.28640000   0.52796293
  0.28640000   0.93423933
  0.28640000   0.86533160
  0.28640000   0.34221554
  0.28640000   0.56269969
  0.28640000   0.76754376
  0.28640000   0.92591789
  0.28640000   0.73243725
  0.28640000   0.40229386
  0.28640000   0.83157787
  0.28640000   0.81019381
  0.28640000   0.64816338
  0.28640000   0.71910878
  0.28640000   0.91767656
  0.28720000   0.66299580
  0.28720000   0.79142435
  0.28720000   0.89465085
  0.28720000   0.70450867
  0.28720000   0.50457278
  0.28720000   0.87765283
  0.28720000   0.87877988
  0.28720000   0.51246253
  0.28720000   0.55225582
  0.28720000   0.92860949
  0.28720000   0.87466287
  0.28720000   0.35841001
  0.28720000   0.54129325
  0.28720000   0.78871443
  0.28720000   0.91769992
  0.28720000   0.69974559
  0.28720000   0.43373982
  0.28720000   0.87390043
  0.28720000   0.82862628
  0.28720000   0.53824467
  0.28720000   0.67944065
  0.28720000   0.93537381
  0.28720000   0.83482103
  0.28720000   0.34859927
  0.28720000   0.63964349
  0.28720000   0.77625254
  0.28720000   0.91122011
  0.28720000   0.72473797
  0.28720000   0.45137861
  0.28720000   0.84900961
  0.28720000   0.85264188
  0.28720000   0.59553430
  0.28720000   0.62472241
  0.28720000   0.94329494
  0.28720000   0.86294219
  0.28720000   0.31241018
  0.28720000   0.56299520
  0.28720000   0.72514712
  0.28720000   0.93358866
  0.28720000   0.78895232
  0.28800000   0.41969887
  0.28800000   0.84315399
  0.28800000   0.82542348
  0.28800000   0.61773242
  0.28800000   0.68853934
  0.28800000   0.93468648
  0.28800000   0.82786818
  0.28800000   0.35330516
  0.28800000   0.65664642
  0.28800000   0.78194765
  0.28800000   0.90108193
  0.28800000   0.71920256
  0.28800000   0.48375508
  0.28800000   0.85980130
  0.28800000   0.87317613
  0.28800000   0.56202430
  0.28800000   0.57095504
  0.28800000   0.94382293
  0.28800000   0.87041420
  0.28800000   0.30797293
  0.28800000   0.54236975
  0.28800000   0.71781299
  0.28800000   0.93103940
  0.28800000   0.79865103
  0.28800000   0.37269030
  0.28800000   0.72080528
  0.28800000   0.79992807
  0.28800000   0.83983439
  0.28800000   0.70726445
  0.28800000   0.64974327
  0.28800000   0.87807045
  0.28800000   0.87873604
  0.28800000   0.51203558
  0.28800000   0.55284377
  0.28800000   0.92887589
  0.28800000   0.87487476
  0.28800000   0.35768869
  0.28800000   0.54085036
  0.28800000   0.78807935
  0.28800000   0.91798535
  0.28880000   0.45680075
  0.28880000   0.66742788
  0.28880000   0.89253556
  0.28880000   0.86155611
  0.28880000   0.47651254
  0.28880000   0.59546745
  0.28880000   0.90979469
  0.28880000   0.88416220
  0.28880000   0.41624640
  0.28880000   0.52575774
  0.28880000   0.85579317
  0.28880000   0.89480385
  0.28880000   0.56401551
  0.28880000   0.50978446
  0.28880000   0.94073827
  0.28880000   0.85520913
  0.28880000   0.32363152
  0.28880000   0.58548271
  0.28880000   0.74261613
  0.28880000   0.93191708
  0.28880000   0.76731389
  0.28880000   0.37688698
  0.28880000   0.77731841
  0.28880000   0.79518977
  0.28880000   0.75998915
  0.28880000   0.73606720
  0.28880000   0.80087786
  0.28880000   0.82216433
  0.28880000   0.71145621
  0.28880000   0.68982390
  0.28880000   0.87104535
  0.28880000   0.85267402
  0.28880000   0.54042586
  0.28880000   0.62396049
  0.28880000   0.94025889
  0.28880000   0.86485624
  0.28880000   0.32285569
  0.28880000   0.56081786
  0.28880000   0.74120040
  0.28880000   0.93145278
  0.28960000   0.89522143
  0.28960000   0.84018956
  0.28960000   0.47597587
  0.28960000   0.64869454
  0.28960000   0.90844124
  0.28960000   0.86730761
  0.28960000   0.42684520
  0.28960000   0.57406096
  0.28960000   0.86893241
  0.28960000   0.90054232
  0.28960000   0.52818891
  0.28960000   0.49114562
  0.28960000   0.93127205
  0.28960000   0.84954794
  0.28960000   0.35800504
  0.28960000   0.60697148
  0.28960000   0.79040369
  0.28960000   0.91984872
  0.28960000   0.69628156
  0.28960000   0.42808720
  0.28960000   0.87726388
  0.28960000   0.82255894
  0.28960000   0.53131785
  0.28960000   0.69323899
  0.28960000   0.93271321
  0.28960000   0.82432392
  0.28960000   0.36125105
  0.28960000   0.66645827
  0.28960000   0.79216588
  0.28960000   0.89279247
  0.28960000   0.70425174
  0.28960000   0.51089244
  0.28960000   0.87933185
  0.28960000   0.88170419
  0.28960000   0.50723787
  0.28960000   0.54450932
  0.28960000   0.92666162
  0.28960000   0.87408918
  0.28960000   0.36552637
  0.28960000   0.54495115
  0.29040000   0.87071678
  0.29040000   0.88116977
  0.29040000   0.53111963
  0.29040000   0.54815314
  0.29040000   0.93690251
  0.29040000   0.87052497
  0.29040000   0.33235359
  0.29040000   0.54804095
  0.29040000   0.75473704
  0.29040000   0.92723087
  0.29040000   0.75216438
  0.29040000   0.39596609
  0.29040000   0.80463758
  0.29040000   0.81158899
  0.29040000   0.70602877
  0.29040000   0.71269859
  0.29040000   0.87430258
  0.29040000   0.82872309
  0.29040000   0.53899527
  0.29040000   0.68090984
  0.29040000   0.93692026
  0.29040000   0.83357197
  0.29040000   0.34463927
  0.29040000   0.64272862
  0.29040000   0.77199206
  0.29040000   0.91164483
  0.29040000   0.73224663
  0.29040000   0.45005136
  0.29040000   0.84061235
  0.29040000   0.85494104
  0.29040000   0.61571913
  0.29040000   0.62006715
  0.29040000   0.94046051
  0.29040000   0.86620686
  0.29040000   0.32196330
  0.29040000   0.55744697
  0.29040000   0.74031209
  0.29040000   0.93158849
  0.29040000   0.77081540
  0.29040000   0.37783593
  0.29120000   0.31599533
  0.29120000   0.54111987
  0.29120000   0.73096255
  0.29120000   0.92986042
  0.29120000   0.78372932
  0.29120000   0.38104314
  0.29120000   0.75098546
  0.29120000   0.80623565
  0.29120000   0.79957980
  0.29120000   0.70671488
  0.29120000   0.73710209
  0.29120000   0.87045157
  0.29120000   0.80084585
  0.29120000   0.55711346
  0.29120000   0.74048114
  0.29120000   0.93342846
  0.29120000   0.77099622
  0.29120000   0.37242527
  0.29120000   0.77156768
  0.29120000   0.79201176
  0.29120000   0.77135691
  0.29120000   0.74071582
  0.29120000   0.78293541
  0.29120000   0.82099548
  0.29120000   0.74581011
  0.29120000   0.68814433
  0.29120000   0.82933299
  0.29120000   0.86810334
  0.29120000   0.63860804
  0.29120000   0.58625380
  0.29120000   0.93275654
  0.29120000   0.87647102
  0.29120000   0.34525358
  0.29120000   0.53513769
  0.29120000   0.77255096
  0.29120000   0.92086139
  0.29120000   0.72720827
  0.29120000   0.42143569
  0.29120000   0.84297797
  0.29120000   0.82807183
  0.29200000   0.64348655
  0.29200000   0.84898458
  0.29200000   0.89276314
  0.29200000   0.58337297
  0.29200000   0.51801117
  0.29200000   0.94351444
  0.29200000   0.85833059
  0.29200000   0.31390004
  0.29200000   0.57642161
  0.29200000   0.72945995
  0.29200000   0.93534120
  0.29200000   0.78342054
  0.29200000   0.36284384
  0.29200000   0.74833787
  0.29200000   0.78437714
  0.29200000   0.80882514
  0.29200000   0.74585503
  0.29200000   0.71328632
  0.29200000   0.82627318
  0.29200000   0.84394620
  0.29200000   0.65327230
  0.29200000   0.64669516
  0.29200000   0.92405161
  0.29200000   0.86294397
  0.29200000   0.37931287
  0.29200000   0.57836708
  0.29200000   0.81835889
  0.29200000   0.91682431
  0.29200000   0.64278363
  0.29200000   0.44296182
  0.29200000   0.91918729
  0.29200000   0.81999886
  0.29200000   0.40722829
  0.29200000   0.68479460
  0.29200000   0.84562250
  0.29200000   0.86470808
  0.29200000   0.60110037
  0.29200000   0.59576052
  0.29200000   0.94464742
  0.29200000   0.86968963
  0.29280000   0.85260009
  0.29280000   0.89035772
  0.29280000   0.57496620
  0.29280000   0.52490090
  0.29280000   0.94423172
  0.29280000   0.86062582
  0.29280000   0.31068834
  0.29280000   0.56996087
  0.29280000   0.72474188
  0.29280000   0.93601864
  0.29280000   0.78890805
  0.29280000   0.35945563
  0.29280000   0.73798789
  0.29280000   0.78202388
  0.29280000   0.82382719
  0.29280000   0.74611989
  0.29280000   0.68189899
  0.29280000   0.82967204
  0.29280000   0.87339797
  0.29280000   0.63603755
  0.29280000   0.57252311
  0.29280000   0.93410007
  0.29280000   0.87592663
  0.29280000   0.34099731
  0.29280000   0.53609168
  0.29280000   0.76725797
  0.29280000   0.92261565
  0.29280000   0.73520219
  0.29280000   0.41493253
  0.29280000   0.83223776
  0.29280000   0.82508154
  0.29280000   0.64446720
  0.29280000   0.69017311
  0.29280000   0.92538695
  0.29280000   0.83120887
  0.29280000   0.38488790
  0.29280000   0.65673246
  0.29280000   0.82337073
  0.29280000   0.89213520
  0.29280000   0.64232634
  0.29360000   0.67003100
  0.29360000   0.44895350
  0.29360000   0.90395068
  0.29360000   0.83199260
  0.29360000   0.45231769
  0.29360000   0.66579604
  0.29360000   0.89069653
  0.29360000   0.86417108
  0.29360000   0.48199512
  0.29360000   0.59098326
  0.29360000   0.91519875
  0.29360000   0.88309891
  0.29360000   0.40048059
  0.29360000   0.52769075
  0.29360000   0.84096226
  0.29360000   0.90125408
  0.29360000   0.59843767
  0.29360000   0.49291435
  0.29360000   0.94008452
  0.29360000   0.84716734
  0.29360000   0.32954311
  0.29360000   0.60800963
  0.29360000   0.75289338
  0.29360000   0.92855862
  0.29360000   0.75487093
  0.29360000   0.39212319
  0.29360000   0.80098859
  0.29360000   0.80904522
  0.29360000   0.71471269
  0.29360000   0.71787330
  0.29360000   0.86531712
  0.29360000   0.82672347
  0.29360000   0.56441872
  0.29360000   0.68778249
  0.29360000   0.94221505
  0.29360000   0.82575924
  0.29360000   0.32935719
  0.29360000   0.65795169
  0.29360000   0.75086456
  0.29360000   0.90817832
  0.29440000   0.35936617
  0.29440000   0.72574704
  0.29440000   0.78440779
  0.29440000   0.83936490
  0.29440000   0.73772532
  0.29440000   0.64865316
  0.29440000   0.84419665
  0.29440000   0.89212893
  0.29440000   0.59563421
  0.29440000   0.52089648
  0.29440000   0.94356725
  0.29440000   0.85975542
  0.29440000   0.31378761
  0.29440000   0.57339170
  0.29440000   0.73012221
  0.29440000   0.93594683
  0.29440000   0.78255225
  0.29440000   0.36165466
  0.29440000   0.75034824
  0.29440000   0.78322350
  0.29440000   0.80687801
  0.29440000   0.74904484
  0.29440000   0.71741107
  0.29440000   0.82198771
  0.29440000   0.84113454
  0.29440000   0.66406586
  0.29440000   0.65355515
  0.29440000   0.91772383
  0.29440000   0.86220817
  0.29440000   0.40069614
  0.29440000   0.58492435
  0.29440000   0.84404923
  0.29440000   0.90978559
  0.29440000   0.58818947
  0.29440000   0.46708898
  0.29440000   0.93880082
  0.29440000   0.83084820
  0.29440000   0.33911531
  0.29440000   0.64859472
  0.29440000   0.76525065
  0.29520000   0.31985653
  0.29520000   0.57315392
  0.29520000   0.73941350
  0.29520000   0.93471350
  0.29520000   0.77116397
  0.29520000   0.36859959
  0.29520000   0.77144075
  0.29520000   0.78812859
  0.29520000   0.77335315
  0.29520000   0.74842908
  0.29520000   0.77941687
  0.29520000   0.81207017
  0.29520000   0.75531950
  0.29520000   0.70642091
  0.29520000   0.81480369
  0.29520000   0.85557331
  0.29520000   0.67508302
  0.29520000   0.61783668
  0.29520000   0.91160267
  0.29520000   0.88074738
  0.29520000   0.41377544
  0.29520000   0.53742813
  0.29520000   0.85663974
  0.29520000   0.90003097
  0.29520000   0.56116889
  0.29520000   0.49660264
  0.29520000   0.94166855
  0.29520000   0.84867898
  0.29520000   0.32396077
  0.29520000   0.60357427
  0.29520000   0.74553256
  0.29520000   0.93133731
  0.29520000   0.76438515
  0.29520000   0.38147532
  0.29520000   0.78489624
  0.29520000   0.80095406
  0.29520000   0.74720104
  0.29520000   0.72943328
  0.29520000   0.82298710
  0.29520000   0.82657512
  0.29600000   0.89685851
  0.29600000   0.57879661
  0.29600000   0.50725693
  0.29600000   0.94414352
  0.29600000   0.85341169
  0.29600000   0.31408656
  0.29600000   0.58991367
  0.29600000   0.73134981
  0.29600000   0.93584209
  0.29600000   0.78125853
  0.29600000   0.36278365
  0.29600000   0.75332796
  0.29600000   0.78461868
  0.29600000   0.80267067
  0.29600000   0.74808854
  0.29600000   0.72644389
  0.29600000   0.82259051
  0.29600000   0.83069129
  0.29600000   0.66630047
  0.29600000   0.67809527
  0.29600000   0.91491646
  0.29600000   0.84676453
  0.29600000   0.41516156
  0.29600000   0.62671042
  0.29600000   0.85961786
  0.29600000   0.89654649
  0.29600000   0.55545416
  0.29600000   0.50722614
  0.29600000   0.94220825
  0.29600000   0.85414177
  0.29600000   0.32056563
  0.29600000   0.58952570
  0.29600000   0.74091986
  0.29600000   0.93430434
  0.29600000   0.76942641
  0.29600000   0.37059918
  0.29600000   0.77492611
  0.29600000   0.79011181
  0.29600000   0.76730316
  0.29600000   0.74631133
  0.29680000   0.85857941
  0.29680000   0.30068861
  0.29680000   0.57407082
  0.29680000   0.71117281
  0.29680000   0.93951571
  0.29680000   0.80328540
  0.29680000   0.34505020
  0.29680000   0.70888394
  0.29680000   0.76853452
  0.29680000   0.86271902
  0.29680000   0.75758473
  0.29680000   0.58815159
  0.29680000   0.81804379
  0.29680000   0.91889427
  0.29680000   0.64385618
  0.29680000   0.43826399
  0.29680000   0.91974319
  0.29680000   0.81632232
  0.29680000   0.40774836
  0.29680000   0.69428820
  0.29680000   0.84686371
  0.29680000   0.85696857
  0.29680000   0.60178016
  0.29680000   0.61751745
  0.29680000   0.94611460
  0.29680000   0.86487836
  0.29680000   0.30383354
  0.29680000   0.55849167
  0.29680000   0.71554788
  0.29680000   0.93755917
  0.29680000   0.79931065
  0.29680000   0.35279422
  0.29680000   0.71825180
  0.29680000   0.77766140
  0.29680000   0.85041526
  0.29680000   0.74652628
  0.29680000   0.62133609
  0.29680000   0.83406191
  0.29680000   0.90769266
  0.29680000   0.61343530
  0.29760000   0.51567343
  0.29760000   0.77458230
  0.29760000   0.91652228
  0.29760000   0.72732317
  0.29760000   0.43795171
  0.29760000   0.84770825
  0.29760000   0.84393872
  0.29760000   0.60392997
  0.29760000   0.64991686
  0.29760000   0.94473702
  0.29760000   0.85195391
  0.29760000   0.31336732
  0.29760000   0.59399920
  0.29760000   0.73103994
  0.29760000   0.93612946
  0.29760000   0.78181781
  0.29760000   0.36223205
  0.29760000   0.75276947
  0.29760000   0.78457428
  0.29760000   0.80401752
  0.29760000   0.74830615
  0.29760000   0.72429863
  0.29760000   0.82316576
  0.29760000   0.83357418
  0.29760000   0.66461845
  0.29760000   0.67227262
  0.29760000   0.91717013
  0.29760000   0.85050017
  0.29760000   0.40713032
  0.29760000   0.61674221
  0.29760000   0.85207968
  0.29760000   0.90266781
  0.29760000   0.57221134
  0.29760000   0.48999610
  0.29760000   0.94284294
  0.29760000   0.84461898
  0.29760000   0.32172183
  0.29760000   0.61360078
  0.29760000   0.74302496
  0.29760000   0.93027405
  0.29840000   0.87878138
  0.29840000   0.76366853
  0.29840000   0.54486747
  0.29840000   0.80808608
  0.29840000   0.91860387
  0.29840000   0.66485862
  0.29840000   0.43860047
  0.29840000   0.90787386
  0.29840000   0.82212242
  0.29840000   0.44431287
  0.29840000   0.68825268
  0.29840000   0.88359306
  0.29840000   0.85015203
  0.29840000   0.50815089
  0.29840000   0.63099334
  0.29840000   0.93117077
  0.29840000   0.86704041
  0.29840000   0.35505727
  0.29840000   0.56454506
  0.29840000   0.78955938
  0.29840000   0.92501494
  0.29840000   0.69665853
  0.29840000   0.41419667
  0.29840000   0.87763372
  0.29840000   0.81023839
  0.29840000   0.53589964
  0.29840000   0.72271938
  0.29840000   0.93336650
  0.29840000   0.79393360
  0.29840000   0.36935831
  0.29840000   0.73253345
  0.29840000   0.79761491
  0.29840000   0.82906844
  0.29840000   0.71759313
  0.29840000   0.67673285
  0.29840000   0.86861321
  0.29840000   0.86627267
  0.29840000   0.54432714
  0.29840000   0.59277562
  0.29840000   0.94510105
  0.29920000   0.75334469
  0.29920000   0.43784716
  0.29920000   0.81264427
  0.29920000   0.85453967
  0.29920000   0.67944940
  0.29920000   0.62077965
  0.29920000   0.90910809
  0.29920000   0.88105131
  0.29920000   0.42192119
  0.29920000   0.53904288
  0.29920000   0.86628649
  0.29920000   0.89785571
  0.29920000   0.53766944
  0.29920000   0.50331235
  0.29920000   0.93886551
  0.29920000   0.85380370
  0.29920000   0.33285279
  0.29920000   0.59389423
  0.29920000   0.75975220
  0.29920000   0.93135368
  0.29920000   0.74388527
  0.29920000   0.38644838
  0.29920000   0.81754546
  0.29920000   0.79945885
  0.29920000   0.68503326
  0.29920000   0.74221592
  0.29920000   0.89257644
  0.29920000   0.78704067
  0.29920000   0.50050333
  0.29920000   0.76527611
  0.29920000   0.91160060
  0.29920000   0.74476372
  0.29920000   0.45120665
  0.29920000   0.82714539
  0.29920000   0.86222901
  0.29920000   0.64606663
  0.29920000   0.60371719
  0.29920000   0.93172663
  0.29920000   0.87539921
  0.29920000   0.35052318
  0.30000000   0.93806099
  0.30000000   0.81670684
  0.30000000   0.34727650
  0.30000000   0.68281341
  0.30000000   0.77567492
  0.30000000   0.88684589
  0.30000000   0.73746628
  0.30000000   0.52681831
  0.30000000   0.84523136
  0.30000000   0.90221779
  0.30000000   0.58953394
  0.30000000   0.49259032
  0.30000000   0.94357584
  0.30000000   0.84604837
  0.30000000   0.31924397
  0.30000000   0.61021769
  0.30000000   0.74030673
  0.30000000   0.93232772
  0.30000000   0.77164376
  0.30000000   0.37807108
  0.30000000   0.77393717
  0.30000000   0.80071640
  0.30000000   0.76749955
  0.30000000   0.72745135
  0.30000000   0.79407252
  0.30000000   0.83795792
  0.30000000   0.72263536
  0.30000000   0.65657894
  0.30000000   0.86506062
  0.30000000   0.88204856
  0.30000000   0.54836560
  0.30000000   0.55063329
  0.30000000   0.94552435
  0.30000000   0.86824090
  0.30000000   0.30523383
  0.30000000   0.55073160
  0.30000000   0.71854161
  0.30000000   0.93688474
  0.30000000   0.79653152
  0.30000000   0.35670435
  0.30080000   0.83864146
  0.30080000   0.72390719
  0.30080000   0.65523911
  0.30080000   0.86405727
  0.30080000   0.88352522
  0.30080000   0.55070621
  0.30080000   0.54697369
  0.30080000   0.94619609
  0.30080000   0.86730408
  0.30080000   0.30341775
  0.30080000   0.55304738
  0.30080000   0.71621192
  0.30080000   0.93797463
  0.30080000   0.79881586
  0.30080000   0.35264812
  0.30080000   0.72038694
  0.30080000   0.77853256
  0.30080000   0.84897219
  0.30080000   0.74645762
  0.30080000   0.62621523
  0.30080000   0.83553535
  0.30080000   0.90656878
  0.30080000   0.61118758
  0.30080000   0.47977070
  0.30080000   0.93900712
  0.30080000   0.84055957
  0.30080000   0.33724149
  0.30080000   0.62766765
  0.30080000   0.76606287
  0.30080000   0.92244402
  0.30080000   0.73849271
  0.30080000   0.41767900
  0.30080000   0.83100958
  0.30080000   0.83025935
  0.30080000   0.64779123
  0.30080000   0.68142942
  0.30080000   0.92734596
  0.30080000   0.83884194
  0.30080000   0.37805425
  0.30080000   0.64034556
  0.30160000   0.31332536
  0.30160000   0.54293851
  0.30160000   0.73088684
  0.30160000   0.93369988
  0.30160000   0.78320693
  0.30160000   0.37119120
  0.30160000   0.75319770
  0.30160000   0.79699014
  0.30160000   0.80147654
  0.30160000   0.72712394
  0.30160000   0.73407459
  0.30160000   0.85108464
  0.30160000   0.81363559
  0.30160000   0.60650449
  0.30160000   0.71950718
  0.30160000   0.93882308
  0.30160000   0.79613881
  0.30160000   0.35134796
  0.30160000   0.72582185
  0.30160000   0.77655057
  0.30160000   0.84340541
  0.30160000   0.75203677
  0.30160000   0.63905330
  0.30160000   0.82741365
  0.30160000   0.90399297
  0.30160000   0.63086499
  0.30160000   0.48760739
  0.30160000   0.93377743
  0.30160000   0.84827085
  0.30160000   0.35305488
  0.30160000   0.61281603
  0.30160000   0.78839701
  0.30160000   0.92249292
  0.30160000   0.70050124
  0.30160000   0.42324677
  0.30160000   0.87646640
  0.30160000   0.82049550
  0.30160000   0.53722014
  0.30160000   0.70252824
  0.30160000   0.93764830
  0.30240000   0.91549957
  0.30240000   0.74458195
  0.30240000   0.43969410
  0.30240000   0.82672074
  0.30240000   0.85308387
  0.30240000   0.65066884
  0.30240000   0.62780460
  0.30240000   0.92986354
  0.30240000   0.86982721
  0.30240000   0.35951188
  0.30240000   0.55930583
  0.30240000   0.79675698
  0.30240000   0.92380094
  0.30240000   0.68431149
  0.30240000   0.42091801
  0.30240000   0.89124279
  0.30240000   0.81249736
  0.30240000   0.49777117
  0.30240000   0.71640960
  0.30240000   0.91937123
  0.30240000   0.80788385
  0.30240000   0.41328187
  0.30240000   0.71463221
  0.30240000   0.85212032
  0.30240000   0.83578250
  0.30240000   0.59710155
  0.30240000   0.67096856
  0.30240000   0.94611932
  0.30240000   0.83818559
  0.30240000   0.31400312
  0.30240000   0.62860942
  0.30240000   0.73312688
  0.30240000   0.92873683
  0.30240000   0.78323555
  0.30240000   0.38843844
  0.30240000   0.75685239
  0.30240000   0.81746802
  0.30240000   0.79096945
  0.30240000   0.68896791
  0.30240000   0.75934162
  0.30320000   0.94871629
  0.30320000   0.85912506
  0.30320000   0.29778262
  0.30320000   0.57354452
  0.30320000   0.70896080
  0.30320000   0.94188455
  0.30320000   0.80506835
  0.30320000   0.33801697
  0.30320000   0.70561302
  0.30320000   0.76137924
  0.30320000   0.86949762
  0.30320000   0.76778534
  0.30320000   0.57016387
  0.30320000   0.80399663
  0.30320000   0.92446562
  0.30320000   0.67085992
  0.30320000   0.42057175
  0.30320000   0.90229958
  0.30320000   0.80787856
  0.30320000   0.46641737
  0.30320000   0.72260798
  0.30320000   0.89848164
  0.30320000   0.80962239
  0.30320000   0.47807904
  0.30320000   0.72070944
  0.30320000   0.90717005
  0.30320000   0.80841068
  0.30320000   0.45204462
  0.30320000   0.71986990
  0.30320000   0.88783606
  0.30320000   0.81720455
  0.30320000   0.50731004
  0.30320000   0.70808200
  0.30320000   0.92599356
  0.30320000   0.81435400
  0.30320000   0.39019651
  0.30320000   0.69757577
  0.30320000   0.82938493
  0.30320000   0.86088266
  0.30320000   0.64263069
  0.30400000   0.62485739
  0.30400000   0.74142879
  0.30400000   0.92909415
  0.30400000   0.77215526
  0.30400000   0.39011421
  0.30400000   0.77664408
  0.30400000   0.81560511
  0.30400000   0.76009690
  0.30400000   0.70017888
  0.30400000   0.81088791
  0.30400000   0.86496524
  0.30400000   0.68156848
  0.30400000   0.59603453
  0.30400000   0.90974567
  0.30400000   0.88731198
  0.30400000   0.41855164
  0.30400000   0.52238766
  0.30400000   0.86365439
  0.30400000   0.89423094
  0.30400000   0.54681350
  0.30400000   0.51640432
  0.30400000   0.94409237
  0.30400000   0.85802571
  0.30400000   0.31431377
  0.30400000   0.58036286
  0.30400000   0.73448622
  0.30400000   0.93834732
  0.30400000   0.77678895
  0.30400000   0.35745816
  0.30400000   0.76231816
  0.30400000   0.77833794
  0.30400000   0.79272522
  0.30400000   0.76377563
  0.30400000   0.74493991
  0.30400000   0.79856350
  0.30400000   0.81506792
  0.30400000   0.72194844
  0.30400000   0.70867942
  0.30400000   0.86223304
  0.30400000   0.84051732
  0.30480000   0.86761270
  0.30480000   0.36535984
  0.30480000   0.56680887
  0.30480000   0.80516490
  0.30480000   0.92289665
  0.30480000   0.66854378
  0.30480000   0.42604746
  0.30480000   0.90514678
  0.30480000   0.81204866
  0.30480000   0.45686075
  0.30480000   0.71329713
  0.30480000   0.89293983
  0.30480000   0.82267039
  0.30480000   0.49117040
  0.30480000   0.69522848
  0.30480000   0.91933390
  0.30480000   0.83021606
  0.30480000   0.40770270
  0.30480000   0.66676934
  0.30480000   0.85246518
  0.30480000   0.87940523
  0.30480000   0.58164769
  0.30480000   0.56063931
  0.30480000   0.95060592
  0.30480000   0.86766253
  0.30480000   0.28817365
  0.30480000   0.54927366
  0.30480000   0.69355536
  0.30480000   0.94134331
  0.30480000   0.82063928
  0.30480000   0.33595352
  0.30480000   0.67330685
  0.30480000   0.76262523
  0.30480000   0.89854469
  0.30480000   0.75476080
  0.30480000   0.49090394
  0.30480000   0.81930773
  0.30480000   0.89409457
  0.30480000   0.65224871
  0.30480000   0.51710690
  0.30560000   0.90565545
  0.30560000   0.74843311
  0.30560000   0.47074458
  0.30560000   0.82652229
  0.30560000   0.87892319
  0.30560000   0.64258490
  0.30560000   0.56131336
  0.30560000   0.93512384
  0.30560000   0.87560311
  0.30560000   0.33990213
  0.30560000   0.54026163
  0.30560000   0.77059609
  0.30560000   0.92683652
  0.30560000   0.72938852
  0.30560000   0.40606479
  0.30560000   0.84231271
  0.30560000   0.81554349
  0.30560000   0.62695981
  0.30560000   0.71597161
  0.30560000   0.93426996
  0.30560000   0.80244615
  0.30560000   0.36629769
  0.30560000   0.71778483
  0.30560000   0.79847752
  0.30560000   0.84874148
  0.30560000   0.71146831
  0.30560000   0.63393500
  0.30560000   0.88081216
  0.30560000   0.88884497
  0.30560000   0.50389061
  0.30560000   0.52985202
  0.30560000   0.93015232
  0.30560000   0.87016814
  0.30560000   0.35849758
  0.30560000   0.55892982
  0.30560000   0.79645642
  0.30560000   0.92458003
  0.30560000   0.68481813
  0.30560000   0.41935833
  0.30560000   0.89156705
  0.30640000   0.35884037
  0.30640000   0.68630431
  0.30640000   0.79310614
  0.30640000   0.88181433
  0.30640000   0.70975387
  0.30640000   0.54747443
  0.30640000   0.88224982
  0.30640000   0.89641545
  0.30640000   0.49655997
  0.30640000   0.50704325
  0.30640000   0.92461254
  0.30640000   0.86311916
  0.30640000   0.37943325
  0.30640000   0.58195547
  0.30640000   0.82356688
  0.30640000   0.91864937
  0.30640000   0.63250469
  0.30640000   0.44262111
  0.30640000   0.92865943
  0.30640000   0.81700317
  0.30640000   0.38052087
  0.30640000   0.69080432
  0.30640000   0.81956079
  0.30640000   0.87060816
  0.30640000   0.66103920
  0.30640000   0.58317862
  0.30640000   0.92537661
  0.30640000   0.88133640
  0.30640000   0.37075929
  0.30640000   0.53113989
  0.30640000   0.81101067
  0.30640000   0.91437791
  0.30640000   0.66074787
  0.30640000   0.45473236
  0.30640000   0.91529506
  0.30640000   0.83346314
  0.30640000   0.41940078
  0.30640000   0.66166780
  0.30640000   0.86535498
  0.30640000   0.87855064
  0.30720000   0.89736296
  0.30720000   0.81288969
  0.30720000   0.48085189
  0.30720000   0.71544721
  0.30720000   0.91089147
  0.30720000   0.81324622
  0.30720000   0.44006829
  0.30720000   0.70950685
  0.30720000   0.88030455
  0.30720000   0.83229834
  0.30720000   0.52512038
  0.30720000   0.67786381
  0.30720000   0.93846415
  0.30720000   0.83680885
  0.30720000   0.34229267
  0.30720000   0.63950343
  0.30720000   0.77498388
  0.30720000   0.91749175
  0.30720000   0.72701045
  0.30720000   0.43775439
  0.30720000   0.85112352
  0.30720000   0.84455964
  0.30720000   0.59743051
  0.30720000   0.65188698
  0.30720000   0.94909127
  0.30720000   0.84941874
  0.30720000   0.30078460
  0.30720000   0.59972767
  0.30720000   0.71538202
  0.30720000   0.94079805
  0.30720000   0.79915077
  0.30720000   0.34456996
  0.30720000   0.71985602
  0.30720000   0.76981236
  0.30720000   0.85336093
  0.30720000   0.76098492
  0.30720000   0.61455313
  0.30720000   0.81659765
  0.30720000   0.91749454
  0.30720000   0.64903788
  0.30800000   0.70156127
  0.30800000   0.94115041
  0.30800000   0.81339075
  0.30800000   0.33956858
  0.30800000   0.69036909
  0.30800000   0.76706324
  0.30800000   0.88452708
  0.30800000   0.75400918
  0.30800000   0.53301001
  0.30800000   0.82531348
  0.30800000   0.91251293
  0.30800000   0.63222562
  0.30800000   0.46311536
  0.30800000   0.93235973
  0.30800000   0.83249540
  0.30800000   0.36411648
  0.30800000   0.65410651
  0.30800000   0.80322298
  0.30800000   0.90296597
  0.30800000   0.68194586
  0.30800000   0.48922327
  0.30800000   0.90452063
  0.30800000   0.86308445
  0.30800000   0.44386598
  0.30800000   0.59377440
  0.30800000   0.89150184
  0.30800000   0.89463977
  0.30800000   0.47069063
  0.30800000   0.50973362
  0.30800000   0.90887241
  0.30800000   0.87146211
  0.30800000   0.42703807
  0.30800000   0.56880624
  0.30800000   0.87556968
  0.30800000   0.90121426
  0.30800000   0.51274736
  0.30800000   0.49447406
  0.30800000   0.93192510
  0.30800000   0.85301333
  0.30800000   0.35869256
  0.30880000   0.87792365
  0.30880000   0.37017826
  0.30880000   0.54115296
  0.30880000   0.81171069
  0.30880000   0.91775465
  0.30880000   0.65814657
  0.30880000   0.44497485
  0.30880000   0.91639969
  0.30880000   0.82508043
  0.30880000   0.41896539
  0.30880000   0.68116342
  0.30880000   0.86401034
  0.30880000   0.86518489
  0.30880000   0.55825086
  0.30880000   0.59980140
  0.30880000   0.95135304
  0.30880000   0.86701736
  0.30880000   0.28659950
  0.30880000   0.55158183
  0.30880000   0.69262948
  0.30880000   0.94328473
  0.30880000   0.82090901
  0.30880000   0.33008926
  0.30880000   0.67251277
  0.30880000   0.75579400
  0.30880000   0.90172444
  0.30880000   0.76449651
  0.30880000   0.48057712
  0.30880000   0.80456450
  0.30880000   0.89282217
  0.30880000   0.68370291
  0.30880000   0.51972989
  0.30880000   0.90626515
  0.30880000   0.87803995
  0.30880000   0.43331562
  0.30880000   0.55231429
  0.30880000   0.88135454
  0.30880000   0.89715450
  0.30880000   0.49861703
  0.30880000   0.50567452
  0.30960000   0.29163629
  0.30960000   0.54632383
  0.30960000   0.70080709
  0.30960000   0.94160770
  0.30960000   0.81414689
  0.30960000   0.33824650
  0.30960000   0.68899883
  0.30960000   0.76598531
  0.30960000   0.88651200
  0.30960000   0.75527946
  0.30960000   0.52764412
  0.30960000   0.82365608
  0.30960000   0.91163258
  0.30960000   0.63647839
  0.30960000   0.46632764
  0.30960000   0.93151355
  0.30960000   0.83554068
  0.30960000   0.36646892
  0.30960000   0.64811909
  0.30960000   0.80721914
  0.30960000   0.90574062
  0.30960000   0.67308392
  0.30960000   0.48212276
  0.30960000   0.91133030
  0.30960000   0.85587480
  0.30960000   0.42558618
  0.30960000   0.60994732
  0.30960000   0.87513697
  0.30960000   0.89849881
  0.30960000   0.51558282
  0.30960000   0.50360852
  0.30960000   0.93474366
  0.30960000   0.85691802
  0.30960000   0.34824209
  0.30960000   0.59236882
  0.30960000   0.78489835
  0.30960000   0.92913197
  0.30960000   0.70446849
  0.30960000   0.40335705
  0.30960000   0.87158346
  0.31040000   0.84073404
  0.31040000   0.90725716
  0.31040000   0.59924476
  0.31040000   0.48084064
  0.31040000   0.94471985
  0.31040000   0.83903949
  0.31040000   0.31980914
  0.31040000   0.62982582
  0.31040000   0.74436980
  0.31040000   0.92870475
  0.31040000   0.76901997
  0.31040000   0.39401670
  0.31040000   0.78454648
  0.31040000   0.82005818
  0.31040000   0.74672567
  0.31040000   0.69534121
  0.31040000   0.83344602
  0.31040000   0.86461066
  0.31040000   0.63421469
  0.31040000   0.60245993
  0.31040000   0.94173524
  0.31040000   0.87211384
  0.31040000   0.31960047
  0.31040000   0.54659173
  0.31040000   0.74381065
  0.31040000   0.93534418
  0.31040000   0.76644996
  0.31040000   0.37204706
  0.31040000   0.78442233
  0.31040000   0.79391561
  0.31040000   0.75401397
  0.31040000   0.74638791
  0.31040000   0.81513579
  0.31040000   0.81018254
  0.31040000   0.69170924
  0.31040000   0.72484459
  0.31040000   0.89370519
  0.31040000   0.81130256
  0.31040000   0.49438844
  0.31040000   0.72199825
  0.31120000   0.85865906
  0.31120000   0.32046905
  0.31120000   0.58229704
  0.31120000   0.74643594
  0.31120000   0.93861674
  0.31120000   0.76135727
  0.31120000   0.36210881
  0.31120000   0.79067367
  0.31120000   0.77997326
  0.31120000   0.74627974
  0.31120000   0.77325452
  0.31120000   0.82102493
  0.31120000   0.76730673
  0.31120000   0.68999362
  0.31120000   0.80355104
  0.31120000   0.87877729
  0.31120000   0.69281136
  0.31120000   0.56024065
  0.31120000   0.90190359
  0.31120000   0.89176761
  0.31120000   0.44214740
  0.31120000   0.51564540
  0.31120000   0.88804386
  0.31120000   0.88361102
  0.31120000   0.48554930
  0.31120000   0.54455479
  0.31120000   0.92249381
  0.31120000   0.87842821
  0.31120000   0.38178030
  0.31120000   0.54275292
  0.31120000   0.82682166
  0.31120000   0.91432802
  0.31120000   0.62781466
  0.31120000   0.45834699
  0.31120000   0.93439171
  0.31120000   0.82791321
  0.31120000   0.35923306
  0.31120000   0.66426844
  0.31120000   0.79721492
  0.31120000   0.89890942
  0.31200000   0.85848977
  0.31200000   0.89976047
  0.31200000   0.55896027
  0.31200000   0.50333914
  0.31200000   0.94792809
  0.31200000   0.85050330
  0.31200000   0.30491406
  0.31200000   0.59901765
  0.31200000   0.72326385
  0.31200000   0.94113342
  0.31200000   0.79015925
  0.31200000   0.34691615
  0.31200000   0.73863876
  0.31200000   0.77136214
  0.31200000   0.83091614
  0.31200000   0.76688783
  0.31200000   0.66807313
  0.31200000   0.80632554
  0.31200000   0.89556552
  0.31200000   0.68044607
  0.31200000   0.51347033
  0.31200000   0.90983029
  0.31200000   0.87445011
  0.31200000   0.42435984
  0.31200000   0.56187792
  0.31200000   0.87446138
  0.31200000   0.90194640
  0.31200000   0.51624020
  0.31200000   0.49409913
  0.31200000   0.93493429
  0.31200000   0.85186926
  0.31200000   0.34981791
  0.31200000   0.60606374
  0.31200000   0.78781737
  0.31200000   0.92697396
  0.31200000   0.70057430
  0.31200000   0.41189550
  0.31200000   0.87781822
  0.31200000   0.81026736
  0.31200000   0.53895962
  0.31280000   0.51467661
  0.31280000   0.92562823
  0.31280000   0.86685172
  0.31280000   0.37601045
  0.31280000   0.57341071
  0.31280000   0.82159866
  0.31280000   0.92076022
  0.31280000   0.63658607
  0.31280000   0.43792196
  0.31280000   0.92833265
  0.31280000   0.81367293
  0.31280000   0.38421276
  0.31280000   0.70047920
  0.31280000   0.82498557
  0.31280000   0.86147484
  0.31280000   0.65398192
  0.31280000   0.61004663
  0.31280000   0.93216340
  0.31280000   0.87527792
  0.31280000   0.35169871
  0.31280000   0.54587028
  0.31280000   0.78965094
  0.31280000   0.92592920
  0.31280000   0.69772223
  0.31280000   0.41597210
  0.31280000   0.88158837
  0.31280000   0.81315145
  0.31280000   0.52789216
  0.31280000   0.72142437
  0.31280000   0.93570340
  0.31280000   0.79583597
  0.31280000   0.36492621
  0.31280000   0.73234551
  0.31280000   0.79668776
  0.31280000   0.83350227
  0.31280000   0.72150846
  0.31280000   0.67093538
  0.31280000   0.86966024
  0.31280000   0.87315750
  0.31280000   0.54191485
  0.31360000   0.72699714
  0.31360000   0.93847402
  0.31360000   0.78713198
  0.31360000   0.35744640
  0.31360000   0.74698773
  0.31360000   0.78443926
  0.31360000   0.81696412
  0.31360000   0.74921091
  0.31360000   0.70271688
  0.31360000   0.83023921
  0.31360000   0.85931445
  0.31360000   0.64415831
  0.31360000   0.61694633
  0.31360000   0.93807749
  0.31360000   0.87095115
  0.31360000   0.33350873
  0.31360000   0.55389939
  0.31360000   0.76544845
  0.31360000   0.93354879
  0.31360000   0.73562419
  0.31360000   0.38519120
  0.31360000   0.83304958
  0.31360000   0.79694538
  0.31360000   0.65569902
  0.31360000   0.75468708
  0.31360000   0.91623455
  0.31360000   0.76139480
  0.31360000   0.43798265
  0.31360000   0.80558271
  0.31360000   0.86073003
  0.31360000   0.69495487
  0.31360000   0.60862300
  0.31360000   0.90120533
  0.31360000   0.89009210
  0.31360000   0.44537354
  0.31360000   0.52179867
  0.31360000   0.89218437
  0.31360000   0.88485613
  0.31360000   0.47348763
  0.31360000   0.54040999
  0.31440000   0.80570612
  0.31440000   0.76607356
  0.31440000   0.72255783
  0.31440000   0.80202111
  0.31440000   0.84591924
  0.31440000   0.70825942
  0.31440000   0.64458499
  0.31440000   0.88718648
  0.31440000   0.88312115
  0.31440000   0.48987817
  0.31440000   0.54799247
  0.31440000   0.92679380
  0.31440000   0.87788820
  0.31440000   0.36864397
  0.31440000   0.54267166
  0.31440000   0.81197596
  0.31440000   0.91957678
  0.31440000   0.65755177
  0.31440000   0.44117031
  0.31440000   0.91812837
  0.31440000   0.82169400
  0.31440000   0.41584531
  0.31440000   0.68985457
  0.31440000   0.86185191
  0.31440000   0.85967930
  0.31440000   0.56704317
  0.31440000   0.61652086
  0.31440000   0.95419385
  0.31440000   0.86232485
  0.31440000   0.27924150
  0.31440000   0.56338756
  0.31440000   0.68333086
  0.31440000   0.94802944
  0.31440000   0.82719699
  0.31440000   0.31280469
  0.31440000   0.65620364
  0.31440000   0.73383034
  0.31440000   0.91857000
  0.31440000   0.78835588
  0.31440000   0.42398491
  0.31520000   0.33363262
  0.31520000   0.55906379
  0.31520000   0.76628968
  0.31520000   0.93454441
  0.31520000   0.73388720
  0.31520000   0.38255507
  0.31520000   0.83525653
  0.31520000   0.79342960
  0.31520000   0.65195559
  0.31520000   0.76211599
  0.31520000   0.91736463
  0.31520000   0.74973895
  0.31520000   0.43716031
  0.31520000   0.82347953
  0.31520000   0.85511699
  0.31520000   0.65998568
  0.31520000   0.62677549
  0.31520000   0.92901442
  0.31520000   0.87215160
  0.31520000   0.36412173
  0.31520000   0.55783822
  0.31520000   0.80739729
  0.31520000   0.92425907
  0.31520000   0.66492233
  0.31520000   0.42568723
  0.31520000   0.91116964
  0.31520000   0.81063128
  0.31520000   0.44138358
  0.31520000   0.71758122
  0.31520000   0.88281404
  0.31520000   0.82374006
  0.31520000   0.52263130
  0.31520000   0.69961955
  0.31520000   0.93784537
  0.31520000   0.81865426
  0.31520000   0.35198011
  0.31520000   0.68436257
  0.31520000   0.78739787
  0.31520000   0.88742701
  0.31520000   0.71962935
  0.31600000   0.30148266
  0.31600000   0.55450819
  0.31600000   0.71876798
  0.31600000   0.94277136
  0.31600000   0.79486749
  0.31600000   0.34108016
  0.31600000   0.72969327
  0.31600000   0.76623255
  0.31600000   0.84482285
  0.31600000   0.77161622
  0.31600000   0.63582918
  0.31600000   0.80208923
  0.31600000   0.91630080
  0.31600000   0.68027398
  0.31600000   0.45092302
  0.31600000   0.90406720
  0.31600000   0.83706267
  0.31600000   0.45589153
  0.31600000   0.66237874
  0.31600000   0.90188731
  0.31600000   0.86557953
  0.31600000   0.45292690
  0.31600000   0.59138843
  0.31600000   0.90217084
  0.31600000   0.89178090
  0.31600000   0.44154576
  0.31600000   0.51684067
  0.31600000   0.88911993
  0.31600000   0.88425952
  0.31600000   0.48287167
  0.31600000   0.54398561
  0.31600000   0.92243035
  0.31600000   0.87877543
  0.31600000   0.38265748
  0.31600000   0.54337892
  0.31600000   0.82960566
  0.31600000   0.91472758
  0.31600000   0.62204702
  0.31600000   0.45896297
  0.31600000   0.93816673
  0.31680000   0.58388157
  0.31680000   0.80095338
  0.31680000   0.92787666
  0.31680000   0.67619714
  0.31680000   0.41330636
  0.31680000   0.90132576
  0.31680000   0.80281079
  0.31680000   0.47429947
  0.31680000   0.73840258
  0.31680000   0.90587957
  0.31680000   0.78867843
  0.31680000   0.46483240
  0.31680000   0.76424891
  0.31680000   0.89405600
  0.31680000   0.75627425
  0.31680000   0.50789943
  0.31680000   0.82320113
  0.31680000   0.90532153
  0.31680000   0.64128485
  0.31680000   0.48837638
  0.31680000   0.93446062
  0.31680000   0.84987295
  0.31680000   0.35353926
  0.31680000   0.61336584
  0.31680000   0.79456500
  0.31680000   0.92502207
  0.31680000   0.68978480
  0.31680000   0.42139071
  0.31680000   0.89129936
  0.31680000   0.81539140
  0.31680000   0.50059375
  0.31680000   0.71584434
  0.31680000   0.92580816
  0.31680000   0.80738202
  0.31680000   0.39624197
  0.31680000   0.71722227
  0.31680000   0.83811793
  0.31680000   0.84073443
  0.31680000   0.63259252
  0.31680000   0.66403757
  0.31760000   0.89983778
  0.31760000   0.80364495
  0.31760000   0.47879063
  0.31760000   0.73760190
  0.31760000   0.90935364
  0.31760000   0.78834785
  0.31760000   0.45439434
  0.31760000   0.76369656
  0.31760000   0.88627037
  0.31760000   0.76047916
  0.31760000   0.52986439
  0.31760000   0.81890245
  0.31760000   0.91596145
  0.31760000   0.64597558
  0.31760000   0.45508884
  0.31760000   0.92816592
  0.31760000   0.82937521
  0.31760000   0.38160433
  0.31760000   0.66767165
  0.31760000   0.82728795
  0.31760000   0.88981043
  0.31760000   0.63887914
  0.31760000   0.53499109
  0.31760000   0.93998103
  0.31760000   0.86866832
  0.31760000   0.32804267
  0.31760000   0.55963164
  0.31760000   0.75918625
  0.31760000   0.93682392
  0.31760000   0.74406564
  0.31760000   0.37366230
  0.31760000   0.82048533
  0.31760000   0.78787623
  0.31760000   0.68683073
  0.31760000   0.77015937
  0.31760000   0.89117991
  0.31760000   0.74879555
  0.31760000   0.51834954
  0.31760000   0.83556974
  0.31760000   0.90642720
  0.31840000   0.93328247
  0.31840000   0.86215353
  0.31840000   0.35335162
  0.31840000   0.58267602
  0.31840000   0.79499293
  0.31840000   0.92978908
  0.31840000   0.68671898
  0.31840000   0.40632813
  0.31840000   0.89185497
  0.31840000   0.79974899
  0.31840000   0.50368376
  0.31840000   0.74821886
  0.31840000   0.92227671
  0.31840000   0.76798782
  0.31840000   0.41817298
  0.31840000   0.79329225
  0.31840000   0.84622125
  0.31840000   0.72461748
  0.31840000   0.64226067
  0.31840000   0.86989833
  0.31840000   0.89166036
  0.31840000   0.53484584
  0.31840000   0.52889879
  0.31840000   0.94740620
  0.31840000   0.86268912
  0.31840000   0.30418212
  0.31840000   0.56976537
  0.31840000   0.72435978
  0.31840000   0.94451262
  0.31840000   0.78773849
  0.31840000   0.33752557
  0.31840000   0.74281493
  0.31840000   0.75972763
  0.31840000   0.82972446
  0.31840000   0.78739792
  0.31840000   0.66789254
  0.31840000   0.77359030
  0.31840000   0.90585106
  0.31840000   0.73711223
  0.31840000   0.47689257
  0.31920000   0.62212253
  0.31920000   0.73187925
  0.31920000   0.93658930
  0.31920000   0.78275005
  0.31920000   0.36671908
  0.31920000   0.75848538
  0.31920000   0.79580826
  0.31920000   0.79879660
  0.31920000   0.73498325
  0.31920000   0.74378916
  0.31920000   0.84513563
  0.31920000   0.80667413
  0.31920000   0.62770214
  0.31920000   0.73979273
  0.31920000   0.93507243
  0.31920000   0.77451499
  0.31920000   0.37463220
  0.31920000   0.77474353
  0.31920000   0.80241588
  0.31920000   0.77127627
  0.31920000   0.72936589
  0.31920000   0.79413389
  0.31920000   0.84115912
  0.31920000   0.72621348
  0.31920000   0.65502422
  0.31920000   0.86787465
  0.31920000   0.88600331
  0.31920000   0.54302972
  0.31920000   0.54625324
  0.31920000   0.95121418
  0.31920000   0.86602692
  0.31920000   0.28966429
  0.31920000   0.55763246
  0.31920000   0.70170802
  0.31920000   0.94687757
  0.31920000   0.81146928
  0.31920000   0.32296386
  0.31920000   0.69366264
  0.31920000   0.74693933
  0.31920000   0.88907223
  0.32000000   0.91340796
  0.32000000   0.88305542
  0.32000000   0.41158106
  0.32000000   0.53848466
  0.32000000   0.86341810
  0.32000000   0.90297744
  0.32000000   0.54636339
  0.32000000   0.49602130
  0.32000000   0.94787420
  0.32000000   0.84726576
  0.32000000   0.30804872
  0.32000000   0.60983295
  0.32000000   0.73088557
  0.32000000   0.94043077
  0.32000000   0.78201726
  0.32000000   0.35374790
  0.32000000   0.75716274
  0.32000000   0.77944004
  0.32000000   0.80507861
  0.32000000   0.76304411
  0.32000000   0.72621222
  0.32000000   0.80813257
  0.32000000   0.84137092
  0.32000000   0.69898822
  0.32000000   0.65861514
  0.32000000   0.89778158
  0.32000000   0.87164987
  0.32000000   0.46448949
  0.32000000   0.57852995
  0.32000000   0.91283348
  0.32000000   0.88847652
  0.32000000   0.41075568
  0.32000000   0.52271656
  0.32000000   0.86137142
  0.32000000   0.89833612
  0.32000000   0.55356362
  0.32000000   0.51038675
  0.32000000   0.95068866
  0.32000000   0.85323478
  0.32000000   0.29591974
  0.32080000   0.73842710
  0.32080000   0.37231804
  0.32080000   0.82916038
  0.32080000   0.78454833
  0.32080000   0.66977213
  0.32080000   0.77909842
  0.32080000   0.90373545
  0.32080000   0.72896088
  0.32080000   0.48551683
  0.32080000   0.86010896
  0.32080000   0.88132925
  0.32080000   0.56466759
  0.32080000   0.56080269
  0.32080000   0.95600965
  0.32080000   0.86607397
  0.32080000   0.27244683
  0.32080000   0.55328562
  0.32080000   0.67419784
  0.32080000   0.94974827
  0.32080000   0.83405444
  0.32080000   0.30602941
  0.32080000   0.64073135
  0.32080000   0.72690466
  0.32080000   0.93025317
  0.32080000   0.79222060
  0.32080000   0.38629200
  0.32080000   0.74576733
  0.32080000   0.82280710
  0.32080000   0.81014889
  0.32080000   0.67743488
  0.32080000   0.72964144
  0.32080000   0.90819124
  0.32080000   0.80050853
  0.32080000   0.45617671
  0.32080000   0.74235352
  0.32080000   0.89326380
  0.32080000   0.78968823
  0.32080000   0.50385560
  0.32080000   0.76849394
  0.32080000   0.91914911
  0.32160000   0.76036723
  0.32160000   0.75963990
  0.32160000   0.80548241
  0.32160000   0.79597744
  0.32160000   0.71817000
  0.32160000   0.75308141
  0.32160000   0.86497134
  0.32160000   0.78699575
  0.32160000   0.58393085
  0.32160000   0.77871016
  0.32160000   0.93669606
  0.32160000   0.71430552
  0.32160000   0.38115428
  0.32160000   0.86101447
  0.32160000   0.78453670
  0.32160000   0.59353521
  0.32160000   0.78264757
  0.32160000   0.93455567
  0.32160000   0.70821914
  0.32160000   0.38917134
  0.32160000   0.86913898
  0.32160000   0.79076408
  0.32160000   0.57059098
  0.32160000   0.77089751
  0.32160000   0.93794322
  0.32160000   0.72636324
  0.32160000   0.37472955
  0.32160000   0.84540475
  0.32160000   0.78224486
  0.32160000   0.63287190
  0.32160000   0.78588318
  0.32160000   0.92329879
  0.32160000   0.70804071
  0.32160000   0.42691138
  0.32160000   0.87619901
  0.32160000   0.82821916
  0.32160000   0.54090113
  0.32160000   0.69332180
  0.32160000   0.94681127
  0.32160000   0.82078190
  0.32240000   0.92414544
  0.32240000   0.78725968
  0.32240000   0.40839905
  0.32240000   0.75963282
  0.32240000   0.84522405
  0.32240000   0.78293941
  0.32240000   0.63396431
  0.32240000   0.78509611
  0.32240000   0.92336540
  0.32240000   0.70956250
  0.32240000   0.42675520
  0.32240000   0.87479940
  0.32240000   0.82875853
  0.32240000   0.54472952
  0.32240000   0.69261612
  0.32240000   0.94810960
  0.32240000   0.82079893
  0.32240000   0.31715568
  0.32240000   0.67369590
  0.32240000   0.74194896
  0.32240000   0.90800132
  0.32240000   0.78382409
  0.32240000   0.46109695
  0.32240000   0.77442459
  0.32240000   0.89054947
  0.32240000   0.74211105
  0.32240000   0.52268882
  0.32240000   0.84692776
  0.32240000   0.90530563
  0.32240000   0.58769838
  0.32240000   0.49148611
  0.32240000   0.95167519
  0.32240000   0.84317218
  0.32240000   0.29652682
  0.32240000   0.61749370
  0.32240000   0.71392610
  0.32240000   0.94194929
  0.32240000   0.80161569
  0.32240000   0.34407376
  0.32240000   0.71928980
  0.32320000   0.81120361
  0.32320000   0.32039433
  0.32320000   0.69460762
  0.32320000   0.74436558
  0.32320000   0.88988004
  0.32320000   0.78844328
  0.32320000   0.51444884
  0.32320000   0.77244311
  0.32320000   0.92381954
  0.32320000   0.73067098
  0.32320000   0.42200656
  0.32320000   0.84942020
  0.32320000   0.83380054
  0.32320000   0.60891741
  0.32320000   0.68296432
  0.32320000   0.95000471
  0.32320000   0.82853641
  0.32320000   0.30822640
  0.32320000   0.65472884
  0.32320000   0.73049778
  0.32320000   0.92312950
  0.32320000   0.79178834
  0.32320000   0.41094041
  0.32320000   0.75213041
  0.32320000   0.84984097
  0.32320000   0.79284056
  0.32320000   0.62050081
  0.32320000   0.76792350
  0.32320000   0.93279223
  0.32320000   0.73421716
  0.32320000   0.39167220
  0.32320000   0.83942236
  0.32320000   0.80491726
  0.32320000   0.64166241
  0.32320000   0.74362758
  0.32320000   0.92922991
  0.32320000   0.77238237
  0.32320000   0.39596687
  0.32320000   0.78374014
  0.32320000   0.82646712
  0.32400000   0.87725924
  0.32400000   0.80837052
  0.32400000   0.54494776
  0.32400000   0.73671375
  0.32400000   0.94203520
  0.32400000   0.77496461
  0.32400000   0.35151956
  0.32400000   0.77025849
  0.32400000   0.77500622
  0.32400000   0.78687222
  0.32400000   0.77678241
  0.32400000   0.75893616
  0.32400000   0.78088113
  0.32400000   0.80483811
  0.32400000   0.76267695
  0.32400000   0.72862211
  0.32400000   0.81006320
  0.32400000   0.83926915
  0.32400000   0.69701609
  0.32400000   0.66540203
  0.32400000   0.90075988
  0.32400000   0.86670732
  0.32400000   0.45840929
  0.32400000   0.59236871
  0.32400000   0.90988189
  0.32400000   0.88979112
  0.32400000   0.42031629
  0.32400000   0.52198878
  0.32400000   0.87262798
  0.32400000   0.89462520
  0.32400000   0.52617983
  0.32400000   0.52119898
  0.32400000   0.94571592
  0.32400000   0.86085364
  0.32400000   0.31184499
  0.32400000   0.57780681
  0.32400000   0.73815917
  0.32400000   0.94416283
  0.32400000   0.77096002
  0.32400000   0.34444433
  0.32480000   0.72415112
  0.32480000   0.79223486
  0.32480000   0.84804387
  0.32480000   0.72769043
  0.32480000   0.63951024
  0.32480000   0.86861601
  0.32480000   0.89475789
  0.32480000   0.53802229
  0.32480000   0.52233718
  0.32480000   0.95016251
  0.32480000   0.85928976
  0.32480000   0.29687873
  0.32480000   0.57829655
  0.32480000   0.71559956
  0.32480000   0.94825097
  0.32480000   0.79650756
  0.32480000   0.32374772
  0.32480000   0.72499268
  0.32480000   0.74533288
  0.32480000   0.85762990
  0.32480000   0.80032036
  0.32480000   0.59949538
  0.32480000   0.75455442
  0.32480000   0.94116971
  0.32480000   0.75072946
  0.32480000   0.36016425
  0.32480000   0.81056645
  0.32480000   0.77590263
  0.32480000   0.71278267
  0.32480000   0.79043667
  0.32480000   0.86290270
  0.32480000   0.72632849
  0.32480000   0.60273044
  0.32480000   0.87160407
  0.32480000   0.90573097
  0.32480000   0.52524502
  0.32480000   0.48833085
  0.32480000   0.94276234
  0.32480000   0.84605846
  0.32480000   0.32781655
  0.32560000   0.88453524
  0.32560000   0.89684632
  0.32560000   0.49319963
  0.32560000   0.51231714
  0.32560000   0.93018723
  0.32560000   0.86519215
  0.32560000   0.36417466
  0.32560000   0.57922694
  0.32560000   0.81169975
  0.32560000   0.92711819
  0.32560000   0.65600501
  0.32560000   0.42055347
  0.32560000   0.91947569
  0.32560000   0.80295838
  0.32560000   0.41977600
  0.32560000   0.73287173
  0.32560000   0.86320925
  0.32560000   0.81475570
  0.32560000   0.58107809
  0.32560000   0.72555207
  0.32560000   0.94848683
  0.32560000   0.78597460
  0.32560000   0.32648599
  0.32560000   0.74566267
  0.32560000   0.74600647
  0.32560000   0.83095260
  0.32560000   0.80908223
  0.32560000   0.66135284
  0.32560000   0.73512810
  0.32560000   0.92052835
  0.32560000   0.78850750
  0.32560000   0.42156300
  0.32560000   0.76113829
  0.32560000   0.85979994
  0.32560000   0.77644167
  0.32560000   0.60051784
  0.32560000   0.79849994
  0.32560000   0.93072971
  0.32560000   0.68156305
  0.32560000   0.40680636
  0.32640000   0.91121690
  0.32640000   0.54650959
  0.32640000   0.47330557
  0.32640000   0.94783764
  0.32640000   0.83370255
  0.32640000   0.31437783
  0.32640000   0.64520853
  0.32640000   0.74139085
  0.32640000   0.92738659
  0.32640000   0.77572027
  0.32640000   0.40175823
  0.32640000   0.77998256
  0.32640000   0.83451917
  0.32640000   0.75427540
  0.32640000   0.66688977
  0.32640000   0.83106174
  0.32640000   0.89264399
  0.32640000   0.63153631
  0.32640000   0.53062493
  0.32640000   0.94635675
  0.32640000   0.86494401
  0.32640000   0.30897514
  0.32640000   0.56724779
  0.32640000   0.73462500
  0.32640000   0.94525415
  0.32640000   0.77530456
  0.32640000   0.34033687
  0.32640000   0.76758408
  0.32640000   0.76088496
  0.32640000   0.79495048
  0.32640000   0.79801023
  0.32640000   0.73913983
  0.32640000   0.74706200
  0.32640000   0.84141728
  0.32640000   0.80513962
  0.32640000   0.63903898
  0.32640000   0.74506484
  0.32640000   0.93163659
  0.32640000   0.76987993
  0.32640000   0.38960527
  0.32720000   0.56009983
  0.32720000   0.70459454
  0.32720000   0.94950649
  0.32720000   0.80778666
  0.32720000   0.31673505
  0.32720000   0.70178079
  0.32720000   0.73941882
  0.32720000   0.88517128
  0.32720000   0.79794157
  0.32720000   0.52661956
  0.32720000   0.75717839
  0.32720000   0.93342526
  0.32720000   0.75066526
  0.32720000   0.38749164
  0.32720000   0.81707624
  0.32720000   0.80825431
  0.32720000   0.69145608
  0.32720000   0.73405306
  0.32720000   0.89753107
  0.32720000   0.80065733
  0.32720000   0.49039766
  0.32720000   0.74874236
  0.32720000   0.91803309
  0.32720000   0.77071651
  0.32720000   0.43421304
  0.32720000   0.79459738
  0.32720000   0.86403607
  0.32720000   0.71782936
  0.32720000   0.60159019
  0.32720000   0.88240613
  0.32720000   0.90183911
  0.32720000   0.49752363
  0.32720000   0.49844299
  0.32720000   0.93193293
  0.32720000   0.85758731
  0.32720000   0.36149766
  0.32720000   0.59880921
  0.32720000   0.80898434
  0.32720000   0.92684641
  0.32720000   0.66197393
  0.32800000   0.72188259
  0.32800000   0.38825416
  0.32800000   0.85549329
  0.32800000   0.79613548
  0.32800000   0.60623999
  0.32800000   0.76349526
  0.32800000   0.93883899
  0.32800000   0.73851938
  0.32800000   0.37161594
  0.32800000   0.83106789
  0.32800000   0.78478710
  0.32800000   0.66749772
  0.32800000   0.78142927
  0.32800000   0.90688291
  0.32800000   0.72458453
  0.32800000   0.47893571
  0.32800000   0.86724741
  0.32800000   0.87579025
  0.32800000   0.54962726
  0.32800000   0.57811219
  0.32800000   0.95690686
  0.32800000   0.86717523
  0.32800000   0.27024194
  0.32800000   0.55145658
  0.32800000   0.67313254
  0.32800000   0.95204761
  0.32800000   0.83416629
  0.32800000   0.29943422
  0.32800000   0.64063694
  0.32800000   0.71936767
  0.32800000   0.93388410
  0.32800000   0.80014423
  0.32800000   0.37386511
  0.32800000   0.73035569
  0.32800000   0.81302808
  0.32800000   0.83544049
  0.32800000   0.69203249
  0.32800000   0.67561174
  0.32800000   0.90542953
  0.32800000   0.85731903
  0.32880000   0.78468108
  0.32880000   0.64712736
  0.32880000   0.78327837
  0.32880000   0.91910288
  0.32880000   0.71551336
  0.32880000   0.44185350
  0.32880000   0.87279909
  0.32880000   0.84474048
  0.32880000   0.54637893
  0.32880000   0.65798874
  0.32880000   0.95418760
  0.32880000   0.84460126
  0.32880000   0.28888985
  0.32880000   0.61380585
  0.32880000   0.70445207
  0.32880000   0.94657895
  0.32880000   0.80986289
  0.32880000   0.32712361
  0.32880000   0.70059331
  0.32880000   0.75536210
  0.32880000   0.88372464
  0.32880000   0.77627261
  0.32880000   0.53680951
  0.32880000   0.79773167
  0.32880000   0.92722522
  0.32880000   0.68470960
  0.32880000   0.41910858
  0.32880000   0.89945802
  0.32880000   0.81162663
  0.32880000   0.48080081
  0.32880000   0.72577085
  0.32880000   0.91648234
  0.32880000   0.80170246
  0.32880000   0.43148451
  0.32880000   0.73872091
  0.32880000   0.87481895
  0.32880000   0.80345408
  0.32880000   0.55447862
  0.32880000   0.74889926
  0.32880000   0.94323416
  0.32960000   0.32992045
  0.32960000   0.76606660
  0.32960000   0.74796733
  0.32960000   0.80139871
  0.32960000   0.81657565
  0.32960000   0.72246072
  0.32960000   0.71385095
  0.32960000   0.86951436
  0.32960000   0.83743405
  0.32960000   0.55911742
  0.32960000   0.67675886
  0.32960000   0.95553693
  0.32960000   0.83125495
  0.32960000   0.28903691
  0.32960000   0.64538935
  0.32960000   0.70376465
  0.32960000   0.93471204
  0.32960000   0.81717421
  0.32960000   0.36672958
  0.32960000   0.69491088
  0.32960000   0.81027271
  0.32960000   0.87573807
  0.32960000   0.68313981
  0.32960000   0.57563888
  0.32960000   0.91744583
  0.32960000   0.88822830
  0.32960000   0.39816450
  0.32960000   0.52424656
  0.32960000   0.85144935
  0.32960000   0.90466729
  0.32960000   0.57735089
  0.32960000   0.49562892
  0.32960000   0.95486479
  0.32960000   0.84411682
  0.32960000   0.28614708
  0.32960000   0.61422703
  0.32960000   0.70018452
  0.32960000   0.94718626
  0.32960000   0.81376078
  0.32960000   0.32392934
  0.33040000   0.94805479
  0.33040000   0.84256222
  0.33040000   0.31128664
  0.33040000   0.62462779
  0.33040000   0.73909740
  0.33040000   0.93789030
  0.33040000   0.77367542
  0.33040000   0.36764055
  0.33040000   0.77761611
  0.33040000   0.79580306
  0.33040000   0.77090391
  0.33040000   0.74524615
  0.33040000   0.79523401
  0.33040000   0.82275292
  0.33040000   0.73273096
  0.33040000   0.69920230
  0.33040000   0.85915958
  0.33040000   0.85686636
  0.33040000   0.57937764
  0.33040000   0.63043747
  0.33040000   0.96041565
  0.33040000   0.85569574
  0.33040000   0.26250933
  0.33040000   0.57970901
  0.33040000   0.66212715
  0.33040000   0.95657536
  0.33040000   0.83976576
  0.33040000   0.28167628
  0.33040000   0.62354217
  0.33040000   0.69296834
  0.33040000   0.94548789
  0.33040000   0.82159720
  0.33040000   0.32773100
  0.33040000   0.67645727
  0.33040000   0.75966589
  0.33040000   0.90458036
  0.33040000   0.76073457
  0.33040000   0.47933355
  0.33040000   0.81796376
  0.33040000   0.89377136
  0.33120000   0.78573213
  0.33120000   0.84195016
  0.33120000   0.74338147
  0.33120000   0.65357047
  0.33120000   0.84964384
  0.33120000   0.89600981
  0.33120000   0.58721205
  0.33120000   0.52308501
  0.33120000   0.95806724
  0.33120000   0.85600641
  0.33120000   0.27083084
  0.33120000   0.58129165
  0.33120000   0.67620497
  0.33120000   0.95545505
  0.33120000   0.83034400
  0.33120000   0.28915843
  0.33120000   0.64745895
  0.33120000   0.70399152
  0.33120000   0.93379535
  0.33120000   0.81726151
  0.33120000   0.37000238
  0.33120000   0.69576623
  0.33120000   0.81467371
  0.33120000   0.87387855
  0.33120000   0.67500032
  0.33120000   0.58201294
  0.33120000   0.92462994
  0.33120000   0.88477221
  0.33120000   0.37645834
  0.33120000   0.53015950
  0.33120000   0.82707484
  0.33120000   0.91551600
  0.33120000   0.62947263
  0.33120000   0.46183743
  0.33120000   0.94118118
  0.33120000   0.82915620
  0.33120000   0.34040256
  0.33120000   0.66306612
  0.33120000   0.77914141
  0.33120000   0.90996740
  0.33200000   0.73098512
  0.33200000   0.69360511
  0.33200000   0.86226765
  0.33200000   0.86103151
  0.33200000   0.56991754
  0.33200000   0.61998352
  0.33200000   0.96102527
  0.33200000   0.85899354
  0.33200000   0.25921854
  0.33200000   0.57068944
  0.33200000   0.65692548
  0.33200000   0.95730618
  0.33200000   0.84265240
  0.33200000   0.27828095
  0.33200000   0.61612261
  0.33200000   0.68825473
  0.33200000   0.94891485
  0.33200000   0.82404309
  0.33200000   0.31508992
  0.33200000   0.66839246
  0.33200000   0.74249032
  0.33200000   0.91459481
  0.33200000   0.78111811
  0.33200000   0.44367033
  0.33200000   0.77978460
  0.33200000   0.87755207
  0.33200000   0.73994022
  0.33200000   0.56288975
  0.33200000   0.85575764
  0.33200000   0.91432652
  0.33200000   0.56322040
  0.33200000   0.46617757
  0.33200000   0.95149850
  0.33200000   0.82688992
  0.33200000   0.30471524
  0.33200000   0.65949741
  0.33200000   0.72766781
  0.33200000   0.92336018
  0.33200000   0.79613648
  0.33200000   0.41139218
  0.33280000   0.82619443
  0.33280000   0.86615571
  0.33280000   0.65374215
  0.33280000   0.60506510
  0.33280000   0.93975003
  0.33280000   0.87458480
  0.33280000   0.32984520
  0.33280000   0.54835908
  0.33280000   0.76693333
  0.33280000   0.93777847
  0.33280000   0.73297100
  0.33280000   0.37731232
  0.33280000   0.84076467
  0.33280000   0.78929976
  0.33280000   0.64513297
  0.33280000   0.77651077
  0.33280000   0.92303300
  0.33280000   0.72583259
  0.33280000   0.42873932
  0.33280000   0.85986081
  0.33280000   0.83861065
  0.33280000   0.58349985
  0.33280000   0.67538132
  0.33280000   0.95761077
  0.33280000   0.83108184
  0.33280000   0.28201558
  0.33280000   0.64451983
  0.33280000   0.69356751
  0.33280000   0.93744693
  0.33280000   0.82579969
  0.33280000   0.35528704
  0.33280000   0.67456877
  0.33280000   0.79884580
  0.33280000   0.89707680
  0.33280000   0.69702965
  0.33280000   0.51394290
  0.33280000   0.90241691
  0.33280000   0.88090008
  0.33280000   0.44846840
  0.33280000   0.55482626
  0.33360000   0.86116102
  0.33360000   0.69779329
  0.33360000   0.61436352
  0.33360000   0.90591362
  0.33360000   0.88976012
  0.33360000   0.43476318
  0.33360000   0.52787935
  0.33360000   0.89053617
  0.33360000   0.89120878
  0.33360000   0.47920468
  0.33360000   0.52988024
  0.33360000   0.92570393
  0.33360000   0.87521211
  0.33360000   0.37672413
  0.33360000   0.55742929
  0.33360000   0.82966822
  0.33360000   0.92185045
  0.33360000   0.62095687
  0.33360000   0.44252880
  0.33360000   0.94218081
  0.33360000   0.81280943
  0.33360000   0.34255840
  0.33360000   0.69945876
  0.33360000   0.77881100
  0.33360000   0.88083975
  0.33360000   0.74067683
  0.33360000   0.55413145
  0.33360000   0.85494923
  0.33360000   0.91369058
  0.33360000   0.56572877
  0.33360000   0.46886493
  0.33360000   0.95265410
  0.33360000   0.82834860
  0.33360000   0.30046129
  0.33360000   0.65555242
  0.33360000   0.72201500
  0.33360000   0.92728509
  0.33360000   0.80115539
  0.33360000   0.39743571
  0.33360000   0.73500174
  0.33440000   0.61787010
  0.33440000   0.79066017
  0.33440000   0.93150588
  0.33440000   0.69710466
  0.33440000   0.40556924
  0.33440000   0.88772975
  0.33440000   0.80389093
  0.33440000   0.51918649
  0.33440000   0.74754287
  0.33440000   0.93483644
  0.33440000   0.76484061
  0.33440000   0.38191836
  0.33440000   0.79662057
  0.33440000   0.80973914
  0.33440000   0.73399423
  0.33440000   0.72711262
  0.33440000   0.85433813
  0.33440000   0.82858347
  0.33440000   0.60238541
  0.33440000   0.69948642
  0.33440000   0.95362321
  0.33440000   0.81282727
  0.33440000   0.30315169
  0.33440000   0.69029312
  0.33440000   0.72329362
  0.33440000   0.90158502
  0.33440000   0.81258283
  0.33440000   0.47628370
  0.33440000   0.72545623
  0.33440000   0.91557028
  0.33440000   0.80344120
  0.33440000   0.43555906
  0.33440000   0.73793460
  0.33440000   0.88063788
  0.33440000   0.80325598
  0.33440000   0.54007199
  0.33440000   0.75058364
  0.33440000   0.94150009
  0.33440000   0.75717390
  0.33440000   0.36067077
  0.33520000   0.53974177
  0.33520000   0.56252538
  0.33520000   0.95689687
  0.33520000   0.86677056
  0.33520000   0.27191106
  0.33520000   0.55467866
  0.33520000   0.67870513
  0.33520000   0.95460844
  0.33520000   0.82901269
  0.33520000   0.29363368
  0.33520000   0.65262404
  0.33520000   0.71211846
  0.33520000   0.93107052
  0.33520000   0.81055857
  0.33520000   0.38236008
  0.33520000   0.71359219
  0.33520000   0.82857375
  0.33520000   0.85221409
  0.33520000   0.65436537
  0.33520000   0.64160418
  0.33520000   0.93906203
  0.33520000   0.86279850
  0.33520000   0.33755083
  0.33520000   0.58239287
  0.33520000   0.77985392
  0.33520000   0.93860577
  0.33520000   0.71145367
  0.33520000   0.37889280
  0.33520000   0.86749833
  0.33520000   0.78158652
  0.33520000   0.58094526
  0.33520000   0.79251044
  0.33520000   0.93643255
  0.33520000   0.69059324
  0.33520000   0.38950875
  0.33520000   0.89069232
  0.33520000   0.78443948
  0.33520000   0.51592320
  0.33520000   0.78395259
  0.33520000   0.92497931
  0.33600000   0.80963642
  0.33600000   0.30728339
  0.33600000   0.69790976
  0.33600000   0.72871891
  0.33600000   0.89372319
  0.33600000   0.80951057
  0.33600000   0.50089066
  0.33600000   0.73508211
  0.33600000   0.92913177
  0.33600000   0.78473412
  0.33600000   0.39671491
  0.33600000   0.76645967
  0.33600000   0.83517259
  0.33600000   0.77896735
  0.33600000   0.66266588
  0.33600000   0.79520723
  0.33600000   0.90899141
  0.33600000   0.69987906
  0.33600000   0.47881844
  0.33600000   0.89722297
  0.33600000   0.86438576
  0.33600000   0.47148106
  0.33600000   0.60408915
  0.33600000   0.92375150
  0.33600000   0.88274515
  0.33600000   0.38086110
  0.33600000   0.53824199
  0.33600000   0.83466206
  0.33600000   0.91663130
  0.33600000   0.61253409
  0.33600000   0.46052268
  0.33600000   0.94821825
  0.33600000   0.82467888
  0.33600000   0.31816570
  0.33600000   0.66884803
  0.33600000   0.74845078
  0.33600000   0.91438120
  0.33600000   0.77348915
  0.33600000   0.44747163
  0.33600000   0.79484740
  0.33680000   0.30376411
  0.33680000   0.65493969
  0.33680000   0.72850863
  0.33680000   0.92775114
  0.33680000   0.79358064
  0.33680000   0.39900468
  0.33680000   0.75088545
  0.33680000   0.84143214
  0.33680000   0.80069127
  0.33680000   0.64238270
  0.33680000   0.75701523
  0.33680000   0.93049484
  0.33680000   0.75402630
  0.33680000   0.39999945
  0.33680000   0.81778509
  0.33680000   0.82488695
  0.33680000   0.68747879
  0.33680000   0.70293474
  0.33680000   0.90936032
  0.33680000   0.83256359
  0.33680000   0.44699096
  0.33680000   0.67887180
  0.33680000   0.90061283
  0.33680000   0.85760682
  0.33680000   0.46439846
  0.33680000   0.62096779
  0.33680000   0.91854962
  0.33680000   0.88117056
  0.33680000   0.39869864
  0.33680000   0.54662252
  0.33680000   0.85609175
  0.33680000   0.91123928
  0.33680000   0.56380617
  0.33680000   0.47744674
  0.33680000   0.95455904
  0.33680000   0.83337927
  0.33680000   0.29256494
  0.33680000   0.64285024
  0.33680000   0.71169972
  0.33680000   0.93695595
  0.33760000   0.38695429
  0.33760000   0.83495218
  0.33760000   0.80416471
  0.33760000   0.65599492
  0.33760000   0.74930978
  0.33760000   0.92472107
  0.33760000   0.76832644
  0.33760000   0.41623341
  0.33760000   0.79885839
  0.33760000   0.84818789
  0.33760000   0.71785909
  0.33760000   0.64506172
  0.33760000   0.88474613
  0.33760000   0.88788839
  0.33760000   0.49897413
  0.33760000   0.54364621
  0.33760000   0.94024693
  0.33760000   0.87250169
  0.33760000   0.32955016
  0.33760000   0.55519496
  0.33760000   0.76856079
  0.33760000   0.94011594
  0.33760000   0.72961117
  0.33760000   0.37140306
  0.33760000   0.84525640
  0.33760000   0.78149472
  0.33760000   0.63785348
  0.33760000   0.79264666
  0.33760000   0.92373450
  0.33760000   0.69737514
  0.33760000   0.43231030
  0.33760000   0.89319494
  0.33760000   0.82883945
  0.33760000   0.49636385
  0.33760000   0.69383606
  0.33760000   0.93378593
  0.33760000   0.82841546
  0.33760000   0.36846924
  0.33760000   0.67330169
  0.33760000   0.81782168
  0.33840000   0.84972478
  0.33840000   0.82661958
  0.33840000   0.61464378
  0.33840000   0.70469573
  0.33840000   0.95109827
  0.33840000   0.80900608
  0.33840000   0.31429526
  0.33840000   0.70193598
  0.33840000   0.73982496
  0.33840000   0.88869799
  0.33840000   0.79799641
  0.33840000   0.51971316
  0.33840000   0.76063604
  0.33840000   0.93348763
  0.33840000   0.74658326
  0.33840000   0.39167192
  0.33840000   0.82730526
  0.33840000   0.81260030
  0.33840000   0.67102557
  0.33840000   0.73131271
  0.33840000   0.91847761
  0.33840000   0.79595559
  0.33840000   0.42975574
  0.33840000   0.75289614
  0.33840000   0.87349336
  0.33840000   0.78610012
  0.33840000   0.56566698
  0.33840000   0.78572649
  0.33840000   0.93900421
  0.33840000   0.70218778
  0.33840000   0.38041433
  0.33840000   0.87880223
  0.33840000   0.77960073
  0.33840000   0.55194547
  0.33840000   0.79626359
  0.33840000   0.93387253
  0.33840000   0.68522849
  0.33840000   0.40004706
  0.33840000   0.89858866
  0.33840000   0.79336358
  0.33920000   0.72486860
  0.33920000   0.91859698
  0.33920000   0.80278932
  0.33920000   0.42695190
  0.33920000   0.73910447
  0.33920000   0.87358577
  0.33920000   0.80527787
  0.33920000   0.56000535
  0.33920000   0.74928240
  0.33920000   0.94718540
  0.33920000   0.75634474
  0.33920000   0.34219028
  0.33920000   0.80224511
  0.33920000   0.75809958
  0.33920000   0.73779411
  0.33920000   0.81952523
  0.33920000   0.82790169
  0.33920000   0.68433978
  0.33920000   0.69787287
  0.33920000   0.91381668
  0.33920000   0.83591707
  0.33920000   0.43250061
  0.33920000   0.66964451
  0.33920000   0.88949391
  0.33920000   0.87000874
  0.33920000   0.49283033
  0.33920000   0.59307111
  0.33920000   0.93881223
  0.33920000   0.87701054
  0.33920000   0.33310092
  0.33920000   0.54421721
  0.33920000   0.77366619
  0.33920000   0.93709979
  0.33920000   0.72295050
  0.33920000   0.38351558
  0.33920000   0.85651401
  0.33920000   0.79231786
  0.33920000   0.60768416
  0.33920000   0.77467954
  0.33920000   0.93914983
  0.34000000   0.90491748
  0.34000000   0.88870334
  0.34000000   0.43883210
  0.34000000   0.53351205
  0.34000000   0.89677298
  0.34000000   0.89114210
  0.34000000   0.46186258
  0.34000000   0.52984745
  0.34000000   0.91555520
  0.34000000   0.88090013
  0.34000000   0.40840549
  0.34000000   0.55004238
  0.34000000   0.86777530
  0.34000000   0.90781954
  0.34000000   0.53555214
  0.34000000   0.48763357
  0.34000000   0.95114346
  0.34000000   0.84190652
  0.34000000   0.30265403
  0.34000000   0.62642634
  0.34000000   0.72938454
  0.34000000   0.94212023
  0.34000000   0.78488193
  0.34000000   0.35290243
  0.34000000   0.75769576
  0.34000000   0.78431640
  0.34000000   0.80881052
  0.34000000   0.75875930
  0.34000000   0.72580503
  0.34000000   0.82143341
  0.34000000   0.84302779
  0.34000000   0.67532205
  0.34000000   0.66432776
  0.34000000   0.92515399
  0.34000000   0.85778368
  0.34000000   0.38790430
  0.34000000   0.60825325
  0.34000000   0.84634773
  0.34000000   0.91618814
  0.34000000   0.58628346
  0.34080000   0.50314948
  0.34080000   0.67818816
  0.34080000   0.94043784
  0.34080000   0.83868358
  0.34080000   0.34280152
  0.34080000   0.64478905
  0.34080000   0.78753656
  0.34080000   0.92150828
  0.34080000   0.70759916
  0.34080000   0.43897912
  0.34080000   0.88489390
  0.34080000   0.83910095
  0.34080000   0.51750778
  0.34080000   0.67356780
  0.34080000   0.94760210
  0.34080000   0.83831603
  0.34080000   0.31763978
  0.34080000   0.63933237
  0.34080000   0.75191773
  0.34080000   0.93277038
  0.34080000   0.75979527
  0.34080000   0.39174434
  0.34080000   0.80837766
  0.34080000   0.81930020
  0.34080000   0.70951969
  0.34080000   0.71328505
  0.34080000   0.88760198
  0.34080000   0.83222678
  0.34080000   0.51321764
  0.34080000   0.68944852
  0.34080000   0.94423523
  0.34080000   0.82741541
  0.34080000   0.33354445
  0.34080000   0.66832721
  0.34080000   0.77277874
  0.34080000   0.91099587
  0.34080000   0.73852563
  0.34080000   0.46746602
  0.34080000   0.85225833
  0.34080000   0.87607261
  0.34160000   0.40383930
  0.34160000   0.83614308
  0.34160000   0.82378156
  0.34160000   0.64823947
  0.34160000   0.71050744
  0.34160000   0.93755346
  0.34160000   0.81072422
  0.34160000   0.36253710
  0.34160000   0.71115352
  0.34160000   0.80679945
  0.34160000   0.86363150
  0.34160000   0.69754429
  0.34160000   0.61051775
  0.34160000   0.90904364
  0.34160000   0.89030913
  0.34160000   0.42613641
  0.34160000   0.52741347
  0.34160000   0.88524642
  0.34160000   0.89468579
  0.34160000   0.49416127
  0.34160000   0.52429236
  0.34160000   0.93740303
  0.34160000   0.86796804
  0.34160000   0.34174087
  0.34160000   0.57133933
  0.34160000   0.78759863
  0.34160000   0.93808435
  0.34160000   0.69848040
  0.34160000   0.38461438
  0.34160000   0.88403646
  0.34160000   0.78253843
  0.34160000   0.53720270
  0.34160000   0.79124681
  0.34160000   0.93245990
  0.34160000   0.69548075
  0.34160000   0.40458841
  0.34160000   0.89114681
  0.34160000   0.80221621
  0.34160000   0.51152625
  0.34160000   0.75260003
  0.34240000   0.84755984
  0.34240000   0.27726791
  0.34240000   0.60675872
  0.34240000   0.69090453
  0.34240000   0.95474218
  0.34240000   0.81938799
  0.34240000   0.29828853
  0.34240000   0.67684314
  0.34240000   0.71977581
  0.34240000   0.91582731
  0.34240000   0.81072195
  0.34240000   0.43439741
  0.34240000   0.72557987
  0.34240000   0.88427578
  0.34240000   0.81866998
  0.34240000   0.52709322
  0.34240000   0.72084468
  0.34240000   0.94555852
  0.34240000   0.79442043
  0.34240000   0.33938808
  0.34240000   0.73790335
  0.34240000   0.77119201
  0.34240000   0.84122602
  0.34240000   0.77116099
  0.34240000   0.65261076
  0.34240000   0.81158152
  0.34240000   0.91220158
  0.34240000   0.66707005
  0.34240000   0.47466891
  0.34240000   0.92665785
  0.34240000   0.84796166
  0.34240000   0.38639971
  0.34240000   0.63292615
  0.34240000   0.84442826
  0.34240000   0.90939696
  0.34240000   0.59453200
  0.34240000   0.48610730
  0.34240000   0.95742537
  0.34240000   0.83799668
  0.34240000   0.28196082
  0.34320000   0.76780787
  0.34320000   0.82178525
  0.34320000   0.78346893
  0.34320000   0.69356974
  0.34320000   0.78664056
  0.34320000   0.88886784
  0.34320000   0.72618785
  0.34320000   0.53766752
  0.34320000   0.87656297
  0.34320000   0.90337603
  0.34320000   0.51542389
  0.34320000   0.50129120
  0.34320000   0.94676156
  0.34320000   0.85277464
  0.34320000   0.31538183
  0.34320000   0.60432644
  0.34320000   0.75062809
  0.34320000   0.94529572
  0.34320000   0.75491442
  0.34320000   0.35002504
  0.34320000   0.80721111
  0.34320000   0.76811509
  0.34320000   0.72672395
  0.34320000   0.80706186
  0.34320000   0.84694350
  0.34320000   0.70431247
  0.34320000   0.65237087
  0.34320000   0.90116197
  0.34320000   0.87750848
  0.34320000   0.45643291
  0.34320000   0.56935650
  0.34320000   0.91491991
  0.34320000   0.89024244
  0.34320000   0.40737657
  0.34320000   0.52442858
  0.34320000   0.86637184
  0.34320000   0.90172234
  0.34320000   0.54269029
  0.34320000   0.50807706
  0.34320000   0.95653391
  0.34400000   0.83716672
  0.34400000   0.60336011
  0.34400000   0.68303857
  0.34400000   0.95849816
  0.34400000   0.82527753
  0.34400000   0.28350829
  0.34400000   0.66060423
  0.34400000   0.69877295
  0.34400000   0.93129768
  0.34400000   0.82536006
  0.34400000   0.37928074
  0.34400000   0.68426420
  0.34400000   0.83205532
  0.34400000   0.88181140
  0.34400000   0.63636037
  0.34400000   0.56755854
  0.34400000   0.95250301
  0.34400000   0.87055726
  0.34400000   0.28826274
  0.34400000   0.55124658
  0.34400000   0.70827781
  0.34400000   0.95317345
  0.34400000   0.80313122
  0.34400000   0.30935616
  0.34400000   0.71358687
  0.34400000   0.73219994
  0.34400000   0.87944882
  0.34400000   0.81288491
  0.34400000   0.54285644
  0.34400000   0.73465969
  0.34400000   0.94833997
  0.34400000   0.77597629
  0.34400000   0.33485376
  0.34400000   0.77026840
  0.34400000   0.75801238
  0.34400000   0.79675108
  0.34400000   0.80692052
  0.34400000   0.73803997
  0.34400000   0.73553191
  0.34400000   0.85082758
  0.34480000   0.87814704
  0.34480000   0.52868146
  0.34480000   0.57652095
  0.34480000   0.95738739
  0.34480000   0.86795915
  0.34480000   0.27156791
  0.34480000   0.55363875
  0.34480000   0.68160093
  0.34480000   0.95742975
  0.34480000   0.82566759
  0.34480000   0.28676212
  0.34480000   0.66053038
  0.34480000   0.70397691
  0.34480000   0.93064879
  0.34480000   0.82040473
  0.34480000   0.38316677
  0.34480000   0.69604418
  0.34480000   0.83537736
  0.34480000   0.87019643
  0.34480000   0.63384070
  0.34480000   0.59982354
  0.34480000   0.95433229
  0.34480000   0.86836325
  0.34480000   0.28276263
  0.34480000   0.55578600
  0.34480000   0.69997849
  0.34480000   0.95546586
  0.34480000   0.81031438
  0.34480000   0.29899929
  0.34480000   0.69656051
  0.34480000   0.71915953
  0.34480000   0.89952966
  0.34480000   0.81968639
  0.34480000   0.48269576
  0.34480000   0.71481742
  0.34480000   0.92489689
  0.34480000   0.81232307
  0.34480000   0.40526250
  0.34480000   0.71780017
  0.34480000   0.85728400
  0.34560000   0.81338883
  0.34560000   0.44875023
  0.34560000   0.72352283
  0.34560000   0.89838460
  0.34560000   0.81533416
  0.34560000   0.48789559
  0.34560000   0.72507220
  0.34560000   0.92676413
  0.34560000   0.79965599
  0.34560000   0.40323250
  0.34560000   0.74305972
  0.34560000   0.85062308
  0.34560000   0.81046998
  0.34560000   0.61969901
  0.34560000   0.74173097
  0.34560000   0.94570204
  0.34560000   0.76863607
  0.34560000   0.34678525
  0.34560000   0.78599064
  0.34560000   0.77097547
  0.34560000   0.76732129
  0.34560000   0.79480314
  0.34560000   0.79385336
  0.34560000   0.74633926
  0.34560000   0.75994169
  0.34560000   0.83497209
  0.34560000   0.79311537
  0.34560000   0.66296195
  0.34560000   0.77369229
  0.34560000   0.91772014
  0.34560000   0.73557053
  0.34560000   0.44888138
  0.34560000   0.85543702
  0.34560000   0.86155248
  0.34560000   0.58942220
  0.34560000   0.62392566
  0.34560000   0.96560749
  0.34560000   0.85584851
  0.34560000   0.24621517
  0.34560000   0.57788064
  0.34640000   0.48391132
  0.34640000   0.71743939
  0.34640000   0.92590097
  0.34640000   0.80917337
  0.34640000   0.40345741
  0.34640000   0.72448058
  0.34640000   0.85476034
  0.34640000   0.83304430
  0.34640000   0.60212512
  0.34640000   0.69352846
  0.34640000   0.95835465
  0.34640000   0.81640092
  0.34640000   0.28765882
  0.34640000   0.68153925
  0.34640000   0.70416082
  0.34640000   0.91603880
  0.34640000   0.82834533
  0.34640000   0.42912489
  0.34640000   0.68834338
  0.34640000   0.88645477
  0.34640000   0.85740219
  0.34640000   0.50796886
  0.34640000   0.63012276
  0.34640000   0.94862806
  0.34640000   0.86302814
  0.34640000   0.30581853
  0.34640000   0.57660110
  0.34640000   0.73741538
  0.34640000   0.95156163
  0.34640000   0.76982606
  0.34640000   0.32505894
  0.34640000   0.77852521
  0.34640000   0.74234456
  0.34640000   0.78681034
  0.34640000   0.83292025
  0.34640000   0.74841504
  0.34640000   0.67843307
  0.34640000   0.84577535
  0.34640000   0.88373391
  0.34640000   0.60477562
  0.34720000   0.52325403
  0.34720000   0.68420751
  0.34720000   0.95111210
  0.34720000   0.82850071
  0.34720000   0.31011216
  0.34720000   0.66153183
  0.34720000   0.74134102
  0.34720000   0.92456247
  0.34720000   0.77983942
  0.34720000   0.41630298
  0.34720000   0.78242608
  0.34720000   0.85537139
  0.34720000   0.74731687
  0.34720000   0.62480957
  0.34720000   0.85133098
  0.34720000   0.91227610
  0.34720000   0.57771531
  0.34720000   0.47889396
  0.34720000   0.95940969
  0.34720000   0.83256513
  0.34720000   0.27774009
  0.34720000   0.64321829
  0.34720000   0.69175490
  0.34720000   0.94318742
  0.34720000   0.82561273
  0.34720000   0.33890613
  0.34720000   0.67517879
  0.34720000   0.78159649
  0.34720000   0.90533544
  0.34720000   0.72702509
  0.34720000   0.48916970
  0.34720000   0.87205448
  0.34720000   0.88386061
  0.34720000   0.53681859
  0.34720000   0.56174002
  0.34720000   0.96024463
  0.34720000   0.86523247
  0.34720000   0.26243187
  0.34720000   0.55866652
  0.34720000   0.66741172
  0.34800000   0.83927619
  0.34800000   0.26251092
  0.34800000   0.62329817
  0.34800000   0.66771410
  0.34800000   0.95441020
  0.34800000   0.83830871
  0.34800000   0.29418530
  0.34800000   0.63464021
  0.34800000   0.71872259
  0.34800000   0.94330582
  0.34800000   0.79772512
  0.34800000   0.34740951
  0.34800000   0.73488594
  0.34800000   0.78430781
  0.34800000   0.84322179
  0.34800000   0.74907692
  0.34800000   0.65450882
  0.34800000   0.84742212
  0.34800000   0.89990744
  0.34800000   0.59346200
  0.34800000   0.51758962
  0.34800000   0.96305976
  0.34800000   0.85177701
  0.34800000   0.25744198
  0.34800000   0.59179069
  0.34800000   0.65997012
  0.34800000   0.96220786
  0.34800000   0.83887954
  0.34800000   0.26515520
  0.34800000   0.62502071
  0.34800000   0.67209034
  0.34800000   0.95338532
  0.34800000   0.83577648
  0.34800000   0.29885248
  0.34800000   0.64182560
  0.34800000   0.72559181
  0.34800000   0.93880429
  0.34800000   0.79216327
  0.34800000   0.36476177
  0.34800000   0.74951823
  0.34880000   0.84939440
  0.34880000   0.25223486
  0.34880000   0.59608401
  0.34880000   0.65116173
  0.34880000   0.96252289
  0.34880000   0.84384352
  0.34880000   0.26219089
  0.34880000   0.61248095
  0.34880000   0.66776368
  0.34880000   0.95787649
  0.34880000   0.83617611
  0.34880000   0.28233887
  0.34880000   0.63642339
  0.34880000   0.69999817
  0.34880000   0.94564749
  0.34880000   0.81634728
  0.34880000   0.33353594
  0.34880000   0.69415284
  0.34880000   0.77214887
  0.34880000   0.89200430
  0.34880000   0.74960776
  0.34880000   0.52515544
  0.34880000   0.84603314
  0.34880000   0.91238501
  0.34880000   0.59027612
  0.34880000   0.47910696
  0.34880000   0.95928063
  0.34880000   0.83274158
  0.34880000   0.27843424
  0.34880000   0.64332703
  0.34880000   0.69338076
  0.34880000   0.94340293
  0.34880000   0.82407373
  0.34880000   0.33901467
  0.34880000   0.67899869
  0.34880000   0.78183482
  0.34880000   0.90269495
  0.34880000   0.72809880
  0.34880000   0.49755536
  0.34880000   0.87224867
  0.34960000   0.76439984
  0.34960000   0.81886962
  0.34960000   0.79195690
  0.34960000   0.69956972
  0.34960000   0.77279707
  0.34960000   0.88877087
  0.34960000   0.75142818
  0.34960000   0.53513539
  0.34960000   0.84489085
  0.34960000   0.91684596
  0.34960000   0.59130614
  0.34960000   0.46545034
  0.34960000   0.95777722
  0.34960000   0.82420865
  0.34960000   0.28724418
  0.34960000   0.66518213
  0.34960000   0.70617452
  0.34960000   0.92900200
  0.34960000   0.81973826
  0.34960000   0.39028757
  0.34960000   0.70057195
  0.34960000   0.84481774
  0.34960000   0.86359101
  0.34960000   0.61546413
  0.34960000   0.61976578
  0.34960000   0.96231289
  0.34960000   0.85932155
  0.34960000   0.25800215
  0.34960000   0.57337179
  0.34960000   0.66138951
  0.34960000   0.96330247
  0.34960000   0.83737537
  0.34960000   0.26197809
  0.34960000   0.62796739
  0.34960000   0.66721715
  0.34960000   0.95335360
  0.34960000   0.83942396
  0.34960000   0.29803280
  0.34960000   0.63350656
  0.34960000   0.72539521
  0.35040000   0.66852005
  0.35040000   0.95732632
  0.35040000   0.83609737
  0.35040000   0.28479725
  0.35040000   0.63770155
  0.35040000   0.70446851
  0.35040000   0.94497201
  0.35040000   0.81241357
  0.35040000   0.33763419
  0.35040000   0.70385639
  0.35040000   0.77705870
  0.35040000   0.88176369
  0.35040000   0.74633414
  0.35040000   0.55573128
  0.35040000   0.85333645
  0.35040000   0.91819914
  0.35040000   0.56980002
  0.35040000   0.46075932
  0.35040000   0.95763835
  0.35040000   0.82046942
  0.35040000   0.28900356
  0.35040000   0.67388024
  0.35040000   0.70823983
  0.35040000   0.92258279
  0.35040000   0.82100066
  0.35040000   0.41126518
  0.35040000   0.70233485
  0.35040000   0.86790173
  0.35040000   0.85284422
  0.35040000   0.56163174
  0.35040000   0.64690435
  0.35040000   0.96542839
  0.35040000   0.84585929
  0.35040000   0.25161605
  0.35040000   0.60513604
  0.35040000   0.65083590
  0.35040000   0.96180149
  0.35040000   0.84478586
  0.35040000   0.26506307
  0.35040000   0.61150665
  0.35120000   0.94486532
  0.35120000   0.84377049
  0.35120000   0.32713033
  0.35120000   0.63146738
  0.35120000   0.76979907
  0.35120000   0.93508300
  0.35120000   0.73189292
  0.35120000   0.39286248
  0.35120000   0.85117229
  0.35120000   0.80793536
  0.35120000   0.61978206
  0.35120000   0.74855668
  0.35120000   0.94573398
  0.35120000   0.75934414
  0.35120000   0.35043251
  0.35120000   0.80311719
  0.35120000   0.77230252
  0.35120000   0.73638145
  0.35120000   0.80110919
  0.35120000   0.83874733
  0.35120000   0.72105878
  0.35120000   0.67202916
  0.35120000   0.88394439
  0.35120000   0.87398590
  0.35120000   0.51001264
  0.35120000   0.58873758
  0.35120000   0.95242782
  0.35120000   0.87103617
  0.35120000   0.28984295
  0.35120000   0.55223340
  0.35120000   0.71355416
  0.35120000   0.95501208
  0.35120000   0.79697410
  0.35120000   0.30653031
  0.35120000   0.72670208
  0.35120000   0.72802348
  0.35120000   0.86730964
  0.35120000   0.82477996
  0.35120000   0.57380678
  0.35120000   0.71341729
  0.35200000   0.87022438
  0.35200000   0.46848514
  0.35200000   0.59367211
  0.35200000   0.92746289
  0.35200000   0.88413740
  0.35200000   0.37077974
  0.35200000   0.53688808
  0.35200000   0.82805332
  0.35200000   0.92230732
  0.35200000   0.62657442
  0.35200000   0.44756361
  0.35200000   0.94727943
  0.35200000   0.81591106
  0.35200000   0.32841297
  0.35200000   0.69463505
  0.35200000   0.76589337
  0.35200000   0.89409673
  0.35200000   0.75937964
  0.35200000   0.51787041
  0.35200000   0.83203059
  0.35200000   0.91547962
  0.35200000   0.62193445
  0.35200000   0.47013910
  0.35200000   0.95252488
  0.35200000   0.83088875
  0.35200000   0.30471663
  0.35200000   0.65575215
  0.35200000   0.73517801
  0.35200000   0.93082388
  0.35200000   0.78511413
  0.35200000   0.39530985
  0.35200000   0.77043256
  0.35200000   0.83727222
  0.35200000   0.77549588
  0.35200000   0.66336104
  0.35200000   0.80675888
  0.35200000   0.90945062
  0.35200000   0.67952619
  0.35200000   0.48541538
  0.35200000   0.92198201
  0.35280000   0.85850680
  0.35280000   0.35140982
  0.35280000   0.60181309
  0.35280000   0.80530614
  0.35280000   0.93440389
  0.35280000   0.66841821
  0.35280000   0.40482862
  0.35280000   0.91725818
  0.35280000   0.79127719
  0.35280000   0.43783879
  0.35280000   0.76742780
  0.35280000   0.88157189
  0.35280000   0.76268880
  0.35280000   0.55338326
  0.35280000   0.82979440
  0.35280000   0.92731357
  0.35280000   0.62113986
  0.35280000   0.43196552
  0.35280000   0.94708775
  0.35280000   0.80236950
  0.35280000   0.33370355
  0.35280000   0.72384695
  0.35280000   0.76906468
  0.35280000   0.86246991
  0.35280000   0.76856267
  0.35280000   0.60361830
  0.35280000   0.82154564
  0.35280000   0.93020482
  0.35280000   0.63796369
  0.35280000   0.42168652
  0.35280000   0.93862730
  0.35280000   0.79736743
  0.35280000   0.36494402
  0.35280000   0.74120482
  0.35280000   0.80773563
  0.35280000   0.82945332
  0.35280000   0.71101413
  0.35280000   0.69516623
  0.35280000   0.89290108
  0.35280000   0.85051949
  0.35360000   0.63889378
  0.35360000   0.96582248
  0.35360000   0.84825855
  0.35360000   0.24906977
  0.35360000   0.59883859
  0.35360000   0.64735103
  0.35360000   0.96402316
  0.35360000   0.84516512
  0.35360000   0.25706040
  0.35360000   0.60877884
  0.35360000   0.66086962
  0.35360000   0.96105075
  0.35360000   0.83909869
  0.35360000   0.27054028
  0.35360000   0.62726689
  0.35360000   0.68287186
  0.35360000   0.95322840
  0.35360000   0.82771608
  0.35360000   0.30357779
  0.35360000   0.66280043
  0.35360000   0.73317317
  0.35360000   0.92706809
  0.35360000   0.78973461
  0.35360000   0.40690467
  0.35360000   0.76482677
  0.35360000   0.85182476
  0.35360000   0.77931230
  0.35360000   0.62782493
  0.35360000   0.80303827
  0.35360000   0.92947754
  0.35360000   0.67651588
  0.35360000   0.42131065
  0.35360000   0.91479167
  0.35360000   0.81002781
  0.35360000   0.44046436
  0.35360000   0.73171919
  0.35360000   0.89223879
  0.35360000   0.80938058
  0.35360000   0.51009277
  0.35360000   0.74272015
  0.35440000   0.74484816
  0.35440000   0.80564102
  0.35440000   0.82537396
  0.35440000   0.71691158
  0.35440000   0.70369868
  0.35440000   0.88559512
  0.35440000   0.84576391
  0.35440000   0.51730491
  0.35440000   0.66302725
  0.35440000   0.95368164
  0.35440000   0.84361825
  0.35440000   0.29713594
  0.35440000   0.62486285
  0.35440000   0.72650275
  0.35440000   0.94818660
  0.35440000   0.78653782
  0.35440000   0.33530361
  0.35440000   0.75463071
  0.35440000   0.76545903
  0.35440000   0.82253121
  0.35440000   0.78987494
  0.35440000   0.69345444
  0.35440000   0.77901939
  0.35440000   0.89432287
  0.35440000   0.73906768
  0.35440000   0.52301586
  0.35440000   0.86299487
  0.35440000   0.90640680
  0.35440000   0.55190503
  0.35440000   0.49881120
  0.35440000   0.96190653
  0.35440000   0.84351058
  0.35440000   0.26623052
  0.35440000   0.61598705
  0.35440000   0.67673863
  0.35440000   0.95819873
  0.35440000   0.82998055
  0.35440000   0.28494537
  0.35440000   0.65280213
  0.35440000   0.70521498
  0.35520000   0.81525248
  0.35520000   0.59611985
  0.35520000   0.73533132
  0.35520000   0.95503128
  0.35520000   0.77219734
  0.35520000   0.31495359
  0.35520000   0.77451261
  0.35520000   0.73131027
  0.35520000   0.79875422
  0.35520000   0.84658169
  0.35520000   0.72325486
  0.35520000   0.65411999
  0.35520000   0.88423155
  0.35520000   0.88634830
  0.35520000   0.50432629
  0.35520000   0.55497658
  0.35520000   0.95013565
  0.35520000   0.87085845
  0.35520000   0.29878750
  0.35520000   0.55615484
  0.35520000   0.72917790
  0.35520000   0.95419624
  0.35520000   0.77939245
  0.35520000   0.31559073
  0.35520000   0.76223635
  0.35520000   0.73519763
  0.35520000   0.81775452
  0.35520000   0.83538512
  0.35520000   0.68900012
  0.35520000   0.68571905
  0.35520000   0.91670386
  0.35520000   0.84756393
  0.35520000   0.42265878
  0.35520000   0.64545968
  0.35520000   0.88771529
  0.35520000   0.88841323
  0.35520000   0.49283092
  0.35520000   0.54748813
  0.35520000   0.94333791
  0.35520000   0.87309594
  0.35600000   0.36714815
  0.35600000   0.73171545
  0.35600000   0.81339384
  0.35600000   0.84086838
  0.35600000   0.69596567
  0.35600000   0.67213396
  0.35600000   0.91202181
  0.35600000   0.86086748
  0.35600000   0.43234150
  0.35600000   0.61409683
  0.35600000   0.89878446
  0.35600000   0.89556440
  0.35600000   0.45701819
  0.35600000   0.52183430
  0.35600000   0.91713753
  0.35600000   0.87936850
  0.35600000   0.40709754
  0.35600000   0.55928124
  0.35600000   0.87276973
  0.35600000   0.91049644
  0.35600000   0.52331715
  0.35600000   0.48420173
  0.35600000   0.95228992
  0.35600000   0.84026583
  0.35600000   0.30287065
  0.35600000   0.63449715
  0.35600000   0.73517163
  0.35600000   0.94301304
  0.35600000   0.77855016
  0.35600000   0.35617417
  0.35600000   0.77430843
  0.35600000   0.78938240
  0.35600000   0.78548788
  0.35600000   0.76095788
  0.35600000   0.77477062
  0.35600000   0.81249221
  0.35600000   0.77923526
  0.35600000   0.71860298
  0.35600000   0.79500876
  0.35600000   0.86438042
  0.35680000   0.85261709
  0.35680000   0.24344080
  0.35680000   0.58737494
  0.35680000   0.63914230
  0.35680000   0.96724882
  0.35680000   0.84764493
  0.35680000   0.24478623
  0.35680000   0.59978762
  0.35680000   0.64119521
  0.35680000   0.96551473
  0.35680000   0.84761180
  0.35680000   0.25127238
  0.35680000   0.60181560
  0.35680000   0.65231875
  0.35680000   0.96434729
  0.35680000   0.84244659
  0.35680000   0.25766178
  0.35680000   0.61621408
  0.35680000   0.66288810
  0.35680000   0.96011292
  0.35680000   0.83860840
  0.35680000   0.27502191
  0.35680000   0.63051404
  0.35680000   0.69128996
  0.35680000   0.95205085
  0.35680000   0.82140378
  0.35680000   0.31089382
  0.35680000   0.67951985
  0.35680000   0.74366854
  0.35680000   0.91371883
  0.35680000   0.78330474
  0.35680000   0.45306961
  0.35680000   0.78586040
  0.35680000   0.89098499
  0.35680000   0.72779632
  0.35680000   0.53514580
  0.35680000   0.87905072
  0.35680000   0.90374123
  0.35680000   0.51021865
  0.35680000   0.50442238
  0.35760000   0.69497315
  0.35760000   0.93748212
  0.35760000   0.82690605
  0.35760000   0.36098125
  0.35760000   0.68073310
  0.35760000   0.81428853
  0.35760000   0.89410967
  0.35760000   0.67165087
  0.35760000   0.53436079
  0.35760000   0.93475208
  0.35760000   0.87531908
  0.35760000   0.35133143
  0.35760000   0.55858254
  0.35760000   0.80622028
  0.35760000   0.93584463
  0.35760000   0.66600444
  0.35760000   0.40167950
  0.35760000   0.91976441
  0.35760000   0.78699246
  0.35760000   0.43223105
  0.35760000   0.77582934
  0.35760000   0.87555651
  0.35760000   0.75229707
  0.35760000   0.57389338
  0.35760000   0.84812288
  0.35760000   0.92372909
  0.35760000   0.58082811
  0.35760000   0.44578222
  0.35760000   0.95803869
  0.35760000   0.80848747
  0.35760000   0.29332285
  0.35760000   0.70194675
  0.35760000   0.71389995
  0.35760000   0.89945041
  0.35760000   0.82777161
  0.35760000   0.48348478
  0.35760000   0.70183205
  0.35760000   0.93182689
  0.35760000   0.82386273
  0.35760000   0.38165248
  0.35840000   0.25057596
  0.35840000   0.62402770
  0.35840000   0.65123663
  0.35840000   0.95933012
  0.35840000   0.84650461
  0.35840000   0.27542446
  0.35840000   0.61226643
  0.35840000   0.69334445
  0.35840000   0.95838883
  0.35840000   0.81584720
  0.35840000   0.29001814
  0.35840000   0.68594700
  0.35840000   0.71115011
  0.35840000   0.91498933
  0.35840000   0.82288373
  0.35840000   0.43716863
  0.35840000   0.70568655
  0.35840000   0.89546297
  0.35840000   0.83856427
  0.35840000   0.49165945
  0.35840000   0.67852235
  0.35840000   0.94024712
  0.35840000   0.84013337
  0.35840000   0.34705706
  0.35840000   0.64742366
  0.35840000   0.79948097
  0.35840000   0.92155679
  0.35840000   0.68749944
  0.35840000   0.44760498
  0.35840000   0.91172874
  0.35840000   0.83650195
  0.35840000   0.44231899
  0.35840000   0.67596642
  0.35840000   0.90412025
  0.35840000   0.86118573
  0.35840000   0.45668229
  0.35840000   0.61796242
  0.35840000   0.92045865
  0.35840000   0.88370443
  0.35840000   0.39525980
  0.35920000   0.62990125
  0.35920000   0.82709005
  0.35920000   0.92217013
  0.35920000   0.63095118
  0.35920000   0.45098931
  0.35920000   0.94888802
  0.35920000   0.81878538
  0.35920000   0.32380842
  0.35920000   0.68941623
  0.35920000   0.76254959
  0.35920000   0.90194940
  0.35920000   0.76207939
  0.35920000   0.49599973
  0.35920000   0.82818254
  0.35920000   0.90786511
  0.35920000   0.63538752
  0.35920000   0.49617859
  0.35920000   0.95318813
  0.35920000   0.84785216
  0.35920000   0.29787394
  0.35920000   0.61587246
  0.35920000   0.72958799
  0.35920000   0.95191398
  0.35920000   0.78076282
  0.35920000   0.32478158
  0.35920000   0.76342058
  0.35920000   0.74967144
  0.35920000   0.81417589
  0.35920000   0.81780588
  0.35920000   0.70374215
  0.35920000   0.72396648
  0.35920000   0.89819026
  0.35920000   0.81828160
  0.35920000   0.49167594
  0.35920000   0.72444637
  0.35920000   0.93389889
  0.35920000   0.79835003
  0.35920000   0.38356838
  0.35920000   0.74582226
  0.35920000   0.83202752
  0.36000000   0.70406097
  0.36000000   0.94291124
  0.36000000   0.81513999
  0.36000000   0.34672649
  0.36000000   0.70330232
  0.36000000   0.79305596
  0.36000000   0.88074388
  0.36000000   0.72016227
  0.36000000   0.56687387
  0.36000000   0.89119005
  0.36000000   0.90497753
  0.36000000   0.47575635
  0.36000000   0.49765942
  0.36000000   0.93009336
  0.36000000   0.86145662
  0.36000000   0.37302972
  0.36000000   0.60124239
  0.36000000   0.83556208
  0.36000000   0.92579624
  0.36000000   0.60897097
  0.36000000   0.43956917
  0.36000000   0.95402801
  0.36000000   0.80546972
  0.36000000   0.30951010
  0.36000000   0.71310705
  0.36000000   0.73781062
  0.36000000   0.88402179
  0.36000000   0.80645929
  0.36000000   0.53633367
  0.36000000   0.75317740
  0.36000000   0.94770264
  0.36000000   0.75203882
  0.36000000   0.34775769
  0.36000000   0.81595677
  0.36000000   0.76677303
  0.36000000   0.71428988
  0.36000000   0.81706728
  0.36000000   0.86277553
  0.36000000   0.68117831
  0.36000000   0.62145667
  0.36080000   0.38694248
  0.36080000   0.88893305
  0.36080000   0.78651650
  0.36080000   0.52778752
  0.36080000   0.79054805
  0.36080000   0.93511460
  0.36080000   0.69744477
  0.36080000   0.40195753
  0.36080000   0.89493355
  0.36080000   0.80077338
  0.36080000   0.50615503
  0.36080000   0.76183349
  0.36080000   0.93374266
  0.36080000   0.74684014
  0.36080000   0.39780363
  0.36080000   0.83526804
  0.36080000   0.82209536
  0.36080000   0.65575176
  0.36080000   0.72060066
  0.36080000   0.93804961
  0.36080000   0.80116084
  0.36080000   0.36905514
  0.36080000   0.73758492
  0.36080000   0.81659697
  0.36080000   0.83377929
  0.36080000   0.69334916
  0.36080000   0.69082700
  0.36080000   0.91411432
  0.36080000   0.84527896
  0.36080000   0.43318138
  0.36080000   0.65485969
  0.36080000   0.89917191
  0.36080000   0.87875456
  0.36080000   0.46474310
  0.36080000   0.57306469
  0.36080000   0.92783173
  0.36080000   0.88577056
  0.36080000   0.37043498
  0.36080000   0.53485578
  0.36080000   0.83076035
  0.36160000   0.70492508
  0.36160000   0.78469219
  0.36160000   0.88178385
  0.36160000   0.73503988
  0.36160000   0.56155430
  0.36160000   0.87304788
  0.36160000   0.91299436
  0.36160000   0.52274758
  0.36160000   0.47855135
  0.36160000   0.95345597
  0.36160000   0.83639304
  0.36160000   0.30145307
  0.36160000   0.64460414
  0.36160000   0.73437417
  0.36160000   0.94020336
  0.36160000   0.78175125
  0.36160000   0.36677876
  0.36160000   0.77292418
  0.36160000   0.80511114
  0.36160000   0.78461993
  0.36160000   0.73282300
  0.36160000   0.78424002
  0.36160000   0.85137168
  0.36160000   0.75005825
  0.36160000   0.63931257
  0.36160000   0.85227800
  0.36160000   0.90939641
  0.36160000   0.57915394
  0.36160000   0.49340953
  0.36160000   0.96640611
  0.36160000   0.83824693
  0.36160000   0.25301998
  0.36160000   0.62604752
  0.36160000   0.65664657
  0.36160000   0.95943668
  0.36160000   0.84360237
  0.36160000   0.27699600
  0.36160000   0.62053862
  0.36160000   0.69686567
  0.36160000   0.95665485
  0.36240000   0.93902548
  0.36240000   0.83782920
  0.36240000   0.35277123
  0.36240000   0.65525086
  0.36240000   0.80782433
  0.36240000   0.91544927
  0.36240000   0.67476785
  0.36240000   0.47016325
  0.36240000   0.92705650
  0.36240000   0.84651434
  0.36240000   0.38991669
  0.36240000   0.64329628
  0.36240000   0.85502783
  0.36240000   0.90481197
  0.36240000   0.57371816
  0.36240000   0.50729496
  0.36240000   0.96786796
  0.36240000   0.84444412
  0.36240000   0.24509855
  0.36240000   0.60893661
  0.36240000   0.64375785
  0.36240000   0.96568401
  0.36240000   0.84668415
  0.36240000   0.25238372
  0.36240000   0.60569280
  0.36240000   0.65628405
  0.36240000   0.96534679
  0.36240000   0.83985951
  0.36240000   0.25624998
  0.36240000   0.62318482
  0.36240000   0.66231093
  0.36240000   0.95999847
  0.36240000   0.83946299
  0.36240000   0.27649690
  0.36240000   0.63029471
  0.36240000   0.69578195
  0.36240000   0.95347384
  0.36240000   0.81684568
  0.36240000   0.30875227
  0.36240000   0.69015392
  0.36320000   0.24835456
  0.36320000   0.61907376
  0.36320000   0.64944108
  0.36320000   0.96288416
  0.36320000   0.84561967
  0.36320000   0.26363102
  0.36320000   0.61197445
  0.36320000   0.67556348
  0.36320000   0.96234216
  0.36320000   0.82867786
  0.36320000   0.27201488
  0.36320000   0.65392000
  0.36320000   0.68712498
  0.36320000   0.94330065
  0.36320000   0.83094968
  0.36320000   0.34047108
  0.36320000   0.66809097
  0.36320000   0.79008612
  0.36320000   0.91265969
  0.36320000   0.71036067
  0.36320000   0.47445012
  0.36320000   0.89501545
  0.36320000   0.86647673
  0.36320000   0.48247532
  0.36320000   0.60945270
  0.36320000   0.94096306
  0.36320000   0.87507223
  0.36320000   0.33096700
  0.36320000   0.55555475
  0.36320000   0.77996198
  0.36320000   0.94466500
  0.36320000   0.71024505
  0.36320000   0.36719737
  0.36320000   0.87460916
  0.36320000   0.76933230
  0.36320000   0.57313498
  0.36320000   0.82333981
  0.36320000   0.93399926
  0.36320000   0.63268318
  0.36320000   0.41264367
  0.36400000   0.97040765
  0.36400000   0.85250302
  0.36400000   0.23189559
  0.36400000   0.58493408
  0.36400000   0.62091907
  0.36400000   0.97040769
  0.36400000   0.85250311
  0.36400000   0.23189544
  0.36400000   0.58493382
  0.36400000   0.62091881
  0.36400000   0.97040772
  0.36400000   0.85250320
  0.36400000   0.23189529
  0.36400000   0.58493356
  0.36400000   0.62091856
  0.36400000   0.97040776
  0.36400000   0.85250328
  0.36400000   0.23189514
  0.36400000   0.58493330
  0.36400000   0.62091831
  0.36400000   0.97040779
  0.36400000   0.85250337
  0.36400000   0.23189500
  0.36400000   0.58493305
  0.36400000   0.62091806
  0.36400000   0.97040782
  0.36400000   0.85250345
  0.36400000   0.23189485
  0.36400000   0.58493279
  0.36400000   0.62091781
  0.36400000   0.97040786
  0.36400000   0.85250354
  0.36400000   0.23189471
  0.36400000   0.58493254
  0.36400000   0.62091757
  0.36400000   0.97040789
  0.36400000   0.85250362
  0.36400000   0.23189457
  0.36400000   0.58493229
  0.36400000   0.62091732
  0.36480000   0.61762520
  0.36480000   0.97089133
  0.36480000   0.85319815
  0.36480000   0.22989815
  0.36480000   0.58269873
  0.36480000   0.61762509
  0.36480000   0.97089134
  0.36480000   0.85319820
  0.36480000   0.22989809
  0.36480000   0.58269859
  0.36480000   0.61762498
  0.36480000   0.97089136
  0.36480000   0.85319824
  0.36480000   0.22989802
  0.36480000   0.58269846
  0.36480000   0.61762486
  0.36480000   0.97089138
  0.36480000   0.85319829
  0.36480000   0.22989795
  0.36480000   0.58269832
  0.36480000   0.61762475
  0.36480000   0.97089139
  0.36480000   0.85319833
  0.36480000   0.22989789
  0.36480000   0.58269819
  0.36480000   0.61762464
  0.36480000   0.97089141
  0.36480000   0.85319838
  0.36480000   0.22989782
  0.36480000   0.58269806
  0.36480000   0.61762453
  0.36480000   0.97089143
  0.36480000   0.85319842
  0.36480000   0.22989776
  0.36480000   0.58269792
  0.36480000   0.61762442
  0.36480000   0.97089144
  0.36480000   0.85319847
  0.36480000   0.22989769
  0.36480000   0.58269779
  0.36560000   0.22827838
  0.36560000   0.58110193
  0.36560000   0.61500395
  0.36560000   0.97130067
  0.36560000   0.85368606
  0.36560000   0.22827887
  0.36560000   0.58110262
  0.36560000   0.61500476
  0.36560000   0.97130055
  0.36560000   0.85368583
  0.36560000   0.22827935
  0.36560000   0.58110328
  0.36560000   0.61500553
  0.36560000   0.97130043
  0.36560000   0.85368561
  0.36560000   0.22827980
  0.36560000   0.58110391
  0.36560000   0.61500628
  0.36560000   0.97130032
  0.36560000   0.85368539
  0.36560000   0.22828024
  0.36560000   0.58110453
  0.36560000   0.61500699
  0.36560000   0.97130022
  0.36560000   0.85368519
  0.36560000   0.22828066
  0.36560000   0.58110511
  0.36560000   0.61500769
  0.36560000   0.97130011
  0.36560000   0.85368499
  0.36560000   0.22828107
  0.36560000   0.58110568
  0.36560000   0.61500835
  0.36560000   0.97130001
  0.36560000   0.85368480
  0.36560000   0.22828146
  0.36560000   0.58110622
  0.36560000   0.61500899
  0.36560000   0.97129992
  0.36560000   0.85368462
  0.36640000   0.57991301
  0.36640000   0.61279854
  0.36640000   0.97166026
  0.36640000   0.85403843
  0.36640000   0.22689732
  0.36640000   0.57991289
  0.36640000   0.61279844
  0.36640000   0.97166028
  0.36640000   0.85403847
  0.36640000   0.22689726
  0.36640000   0.57991277
  0.36640000   0.61279834
  0.36640000   0.97166029
  0.36640000   0.85403851
  0.36640000   0.22689721
  0.36640000   0.57991264
  0.36640000   0.61279825
  0.36640000   0.97166031
  0.36640000   0.85403856
  0.36640000   0.22689715
  0.36640000   0.57991252
  0.36640000   0.61279816
  0.36640000   0.97166032
  0.36640000   0.85403860
  0.36640000   0.22689709
  0.36640000   0.57991240
  0.36640000   0.61279806
  0.36640000   0.97166034
  0.36640000   0.85403864
  0.36640000   0.22689704
  0.36640000   0.57991229
  0.36640000   0.61279797
  0.36640000   0.97166036
  0.36640000   0.85403868
  0.36640000   0.22689698
  0.36640000   0.57991217
  0.36640000   0.61279788
  0.36640000   0.97166037
  0.36640000   0.85403872
  0.36640000   0.22689692
  0.36720000   0.85433170
  0.36720000   0.22560451
  0.36720000   0.57890121
  0.36720000   0.61075215
  0.36720000   0.97200442
  0.36720000   0.85433174
  0.36720000   0.22560445
  0.36720000   0.57890109
  0.36720000   0.61075206
  0.36720000   0.97200443
  0.36720000   0.85433178
  0.36720000   0.22560440
  0.36720000   0.57890097
  0.36720000   0.61075197
  0.36720000   0.97200445
  0.36720000   0.85433182
  0.36720000   0.22560434
  0.36720000   0.57890085
  0.36720000   0.61075188
  0.36720000   0.97200447
  0.36720000   0.85433186
  0.36720000   0.22560428
  0.36720000   0.57890073
  0.36720000   0.61075180
  0.36720000   0.97200448
  0.36720000   0.85433190
  0.36720000   0.22560423
  0.36720000   0.57890062
  0.36720000   0.61075171
  0.36720000   0.97200450
  0.36720000   0.85433194
  0.36720000   0.22560418
  0.36720000   0.57890050
  0.36720000   0.61075162
  0.36720000   0.97200451
  0.36720000   0.85433198
  0.36720000   0.22560412
  0.36720000   0.57890039
  0.36720000   0.61075153
  0.36720000   0.97200453
  0.36800000   0.22438787
  0.36800000   0.57804402
  0.36800000   0.60884038
  0.36800000   0.97233440
  0.36800000   0.85457256
  0.36800000   0.22438783
  0.36800000   0.57804392
  0.36800000   0.60884032
  0.36800000   0.97233441
  0.36800000   0.85457259
  0.36800000   0.22438779
  0.36800000   0.57804383
  0.36800000   0.60884026
  0.36800000   0.97233442
  0.36800000   0.85457262
  0.36800000   0.22438775
  0.36800000   0.57804373
  0.36800000   0.60884019
  0.36800000   0.97233443
  0.36800000   0.85457265
  0.36800000   0.22438771
  0.36800000   0.57804364
  0.36800000   0.60884013
  0.36800000   0.97233445
  0.36800000   0.85457269
  0.36800000   0.22438768
  0.36800000   0.57804355
  0.36800000   0.60884007
  0.36800000   0.97233446
  0.36800000   0.85457272
  0.36800000   0.22438764
  0.36800000   0.57804346
  0.36800000   0.60884002
  0.36800000   0.97233447
  0.36800000   0.85457275
  0.36800000   0.22438760
  0.36800000   0.57804337
  0.36800000   0.60883996
  0.36800000   0.97233448
  0.36800000   0.85457278
  0.36880000   0.22323048
  0.36880000   0.57731305
  0.36880000   0.60703233
  0.36880000   0.97265336
  0.36880000   0.85476985
  0.36880000   0.22323043
  0.36880000   0.57731294
  0.36880000   0.60703225
  0.36880000   0.97265338
  0.36880000   0.85476989
  0.36880000   0.22323038
  0.36880000   0.57731283
  0.36880000   0.60703217
  0.36880000   0.97265339
  0.36880000   0.85476992
  0.36880000   0.22323033
  0.36880000   0.57731272
  0.36880000   0.60703209
  0.36880000   0.97265341
  0.36880000   0.85476996
  0.36880000   0.22323028
  0.36880000   0.57731261
  0.36880000   0.60703201
  0.36880000   0.97265342
  0.36880000   0.85477000
  0.36880000   0.22323023
  0.36880000   0.57731251
  0.36880000   0.60703194
  0.36880000   0.97265344
  0.36880000   0.85477004
  0.36880000   0.22323018
  0.36880000   0.57731240
  0.36880000   0.60703186
  0.36880000   0.97265345
  0.36880000   0.85477007
  0.36880000   0.22323013
  0.36880000   0.57731230
  0.36880000   0.60703179
  0.36880000   0.97265346
  0.36880000   0.85477011
  0.36960000   0.85493223
  0.36960000   0.22211554
  0.36960000   0.57668197
  0.36960000   0.60529889
  0.36960000   0.97296497
  0.36960000   0.85493227
  0.36960000   0.22211549
  0.36960000   0.57668186
  0.36960000   0.60529882
  0.36960000   0.97296499
  0.36960000   0.85493230
  0.36960000   0.22211544
  0.36960000   0.57668175
  0.36960000   0.60529874
  0.36960000   0.97296500
  0.36960000   0.85493234
  0.36960000   0.22211539
  0.36960000   0.57668164
  0.36960000   0.60529866
  0.36960000   0.97296502
  0.36960000   0.85493238
  0.36960000   0.22211534
  0.36960000   0.57668154
  0.36960000   0.60529859
  0.36960000   0.97296503
  0.36960000   0.85493242
  0.36960000   0.22211530
  0.36960000   0.57668143
  0.36960000   0.60529851
  0.36960000   0.97296505
  0.36960000   0.85493245
  0.36960000   0.22211525
  0.36960000   0.57668133
  0.36960000   0.60529844
  0.36960000   0.97296506
  0.36960000   0.85493249
  0.36960000   0.22211520
  0.36960000   0.57668123
  0.36960000   0.60529836
  0.36960000   0.97296508
  0.37040000   0.85506414
  0.37040000   0.22103477
  0.37040000   0.57613716
  0.37040000   0.60362525
  0.37040000   0.97327086
  0.37040000   0.85506418
  0.37040000   0.22103472
  0.37040000   0.57613706
  0.37040000   0.60362518
  0.37040000   0.97327088
  0.37040000   0.85506422
  0.37040000   0.22103467
  0.37040000   0.57613696
  0.37040000   0.60362511
  0.37040000   0.97327089
  0.37040000   0.85506425
  0.37040000   0.22103463
  0.37040000   0.57613686
  0.37040000   0.60362504
  0.37040000   0.97327091
  0.37040000   0.85506429
  0.37040000   0.22103458
  0.37040000   0.57613676
  0.37040000   0.60362497
  0.37040000   0.97327092
  0.37040000   0.85506432
  0.37040000   0.22103454
  0.37040000   0.57613666
  0.37040000   0.60362490
  0.37040000   0.97327094
  0.37040000   0.85506436
  0.37040000   0.22103450
  0.37040000   0.57613656
  0.37040000   0.60362483
  0.37040000   0.97327095
  0.37040000   0.85506439
  0.37040000   0.22103445
  0.37040000   0.57613646
  0.37040000   0.60362477
  0.37040000   0.97327096
  0.37120000   0.60199855
  0.37120000   0.97357264
  0.37120000   0.85516941
  0.37120000   0.21998073
  0.37120000   0.57566689
  0.37120000   0.60199850
  0.37120000   0.97357265
  0.37120000   0.85516944
  0.37120000   0.21998070
  0.37120000   0.57566681
  0.37120000   0.60199846
  0.37120000   0.97357266
  0.37120000   0.85516946
  0.37120000   0.21998068
  0.37120000   0.57566673
  0.37120000   0.60199842
  0.37120000   0.97357267
  0.37120000   0.85516949
  0.37120000   0.21998065
  0.37120000   0.57566666
  0.37120000   0.60199838
  0.37120000   0.97357268
  0.37120000   0.85516952
  0.37120000   0.21998062
  0.37120000   0.57566658
  0.37120000   0.60199834
  0.37120000   0.97357268
  0.37120000   0.85516955
  0.37120000   0.21998060
  0.37120000   0.57566650
  0.37120000   0.60199830
  0.37120000   0.97357269
  0.37120000   0.85516957
  0.37120000   0.21998057
  0.37120000   0.57566643
  0.37120000   0.60199826
  0.37120000   0.97357270
  0.37120000   0.85516960
  0.37120000   0.21998054
  0.37120000   0.57566635
  0.37200000   0.60041478
  0.37200000   0.97387042
  0.37200000   0.85524918
  0.37200000   0.21895160
  0.37200000   0.57526706
  0.37200000   0.60041475
  0.37200000   0.97387043
  0.37200000   0.85524921
  0.37200000   0.21895158
  0.37200000   0.57526698
  0.37200000   0.60041471
  0.37200000   0.97387044
  0.37200000   0.85524924
  0.37200000   0.21895155
  0.37200000   0.57526691
  0.37200000   0.60041467
  0.37200000   0.97387045
  0.37200000   0.85524926
  0.37200000   0.21895153
  0.37200000   0.57526683
  0.37200000   0.60041463
  0.37200000   0.97387046
  0.37200000   0.85524929
  0.37200000   0.21895150
  0.37200000   0.57526676
  0.37200000   0.60041460
  0.37200000   0.97387047
  0.37200000   0.85524932
  0.37200000   0.21895148
  0.37200000   0.57526669
  0.37200000   0.60041456
  0.37200000   0.97387047
  0.37200000   0.85524934
  0.37200000   0.21895145
  0.37200000   0.57526661
  0.37200000   0.60041452
  0.37200000   0.97387048
  0.37200000   0.85524937
  0.37200000   0.21895143
  0.37200000   0.57526654
  0.37280000   0.97416532
  0.37280000   0.85530605
  0.37280000   0.21794248
  0.37280000   0.57492996
  0.37280000   0.59886562
  0.37280000   0.97416533
  0.37280000   0.85530608
  0.37280000   0.21794246
  0.37280000   0.57492989
  0.37280000   0.59886558
  0.37280000   0.97416533
  0.37280000   0.85530610
  0.37280000   0.21794243
  0.37280000   0.57492982
  0.37280000   0.59886555
  0.37280000   0.97416534
  0.37280000   0.85530613
  0.37280000   0.21794241
  0.37280000   0.57492974
  0.37280000   0.59886551
  0.37280000   0.97416535
  0.37280000   0.85530616
  0.37280000   0.21794239
  0.37280000   0.57492967
  0.37280000   0.59886548
  0.37280000   0.97416536
  0.37280000   0.85530618
  0.37280000   0.21794236
  0.37280000   0.57492960
  0.37280000   0.59886544
  0.37280000   0.97416537
  0.37280000   0.85530621
  0.37280000   0.21794234
  0.37280000   0.57492952
  0.37280000   0.59886541
  0.37280000   0.97416538
  0.37280000   0.85530623
  0.37280000   0.21794232
  0.37280000   0.57492945
  0.37280000   0.59886537
  0.37360000   0.21695152
  0.37360000   0.57465192
  0.37360000   0.59734764
  0.37360000   0.97445761
  0.37360000   0.85534120
  0.37360000   0.21695148
  0.37360000   0.57465183
  0.37360000   0.59734759
  0.37360000   0.97445763
  0.37360000   0.85534123
  0.37360000   0.21695145
  0.37360000   0.57465175
  0.37360000   0.59734754
  0.37360000   0.97445764
  0.37360000   0.85534126
  0.37360000   0.21695142
  0.37360000   0.57465166
  0.37360000   0.59734749
  0.37360000   0.97445765
  0.37360000   0.85534129
  0.37360000   0.21695138
  0.37360000   0.57465158
  0.37360000   0.59734744
  0.37360000   0.97445766
  0.37360000   0.85534132
  0.37360000   0.21695135
  0.37360000   0.57465150
  0.37360000   0.59734739
  0.37360000   0.97445767
  0.37360000   0.85534135
  0.37360000   0.21695132
  0.37360000   0.57465141
  0.37360000   0.59734735
  0.37360000   0.97445768
  0.37360000   0.85534138
  0.37360000   0.21695129
  0.37360000   0.57465133
  0.37360000   0.59734730
  0.37360000   0.97445769
  0.37360000   0.85534141
  0.37440000   0.97474864
  0.37440000   0.85535710
  0.37440000   0.21597359
  0.37440000   0.57442559
  0.37440000   0.59585253
  0.37440000   0.97474865
  0.37440000   0.85535712
  0.37440000   0.21597357
  0.37440000   0.57442552
  0.37440000   0.59585250
  0.37440000   0.97474866
  0.37440000   0.85535715
  0.37440000   0.21597355
  0.37440000   0.57442545
  0.37440000   0.59585247
  0.37440000   0.97474866
  0.37440000   0.85535717
  0.37440000   0.21597353
  0.37440000   0.57442538
  0.37440000   0.59585244
  0.37440000   0.97474867
  0.37440000   0.85535720
  0.37440000   0.21597351
  0.37440000   0.57442531
  0.37440000   0.59585241
  0.37440000   0.97474868
  0.37440000   0.85535722
  0.37440000   0.21597349
  0.37440000   0.57442525
  0.37440000   0.59585239
  0.37440000   0.97474868
  0.37440000   0.85535725
  0.37440000   0.21597347
  0.37440000   0.57442518
  0.37440000   0.59585236
  0.37440000   0.97474869
  0.37440000   0.85535727
  0.37440000   0.21597345
  0.37440000   0.57442511
  0.37440000   0.59585233
  0.37520000   0.97503741
  0.37520000   0.85535301
  0.37520000   0.21501138
  0.37520000   0.57425290
  0.37520000   0.59438397
  0.37520000   0.97503742
  0.37520000   0.85535304
  0.37520000   0.21501135
  0.37520000   0.57425282
  0.37520000   0.59438393
  0.37520000   0.97503743
  0.37520000   0.85535307
  0.37520000   0.21501132
  0.37520000   0.57425274
  0.37520000   0.59438388
  0.37520000   0.97503744
  0.37520000   0.85535310
  0.37520000   0.21501129
  0.37520000   0.57425266
  0.37520000   0.59438384
  0.37520000   0.97503745
  0.37520000   0.85535312
  0.37520000   0.21501126
  0.37520000   0.57425258
  0.37520000   0.59438380
  0.37520000   0.97503746
  0.37520000   0.85535315
  0.37520000   0.21501123
  0.37520000   0.57425250
  0.37520000   0.59438375
  0.37520000   0.97503747
  0.37520000   0.85535318
  0.37520000   0.21501120
  0.37520000   0.57425242
  0.37520000   0.59438371
  0.37520000   0.97503748
  0.37520000   0.85535321
  0.37520000   0.21501117
  0.37520000   0.57425235
  0.37520000   0.59438367
  0.37600000   0.21406019
  0.37600000   0.57412733
  0.37600000   0.59293455
  0.37600000   0.97532523
  0.37600000   0.85533127
  0.37600000   0.21406016
  0.37600000   0.57412725
  0.37600000   0.59293452
  0.37600000   0.97532524
  0.37600000   0.85533130
  0.37600000   0.21406014
  0.37600000   0.57412718
  0.37600000   0.59293448
  0.37600000   0.97532525
  0.37600000   0.85533132
  0.37600000   0.21406011
  0.37600000   0.57412711
  0.37600000   0.59293445
  0.37600000   0.97532526
  0.37600000   0.85533135
  0.37600000   0.21406009
  0.37600000   0.57412703
  0.37600000   0.59293441
  0.37600000   0.97532527
  0.37600000   0.85533138
  0.37600000   0.21406006
  0.37600000   0.57412696
  0.37600000   0.59293437
  0.37600000   0.97532528
  0.37600000   0.85533140
  0.37600000   0.21406004
  0.37600000   0.57412689
  0.37600000   0.59293434
  0.37600000   0.97532529
  0.37600000   0.85533143
  0.37600000   0.21406001
  0.37600000   0.57412682
  0.37600000   0.59293430
  0.37600000   0.97532529
  0.37600000   0.85533145
  0.37680000   0.57404861
  0.37680000   0.59150533
  0.37680000   0.97561171
  0.37680000   0.85529186
  0.37680000   0.21312082
  0.37680000   0.57404853
  0.37680000   0.59150529
  0.37680000   0.97561172
  0.37680000   0.85529189
  0.37680000   0.21312080
  0.37680000   0.57404846
  0.37680000   0.59150526
  0.37680000   0.97561173
  0.37680000   0.85529191
  0.37680000   0.21312078
  0.37680000   0.57404838
  0.37680000   0.59150522
  0.37680000   0.97561174
  0.37680000   0.85529194
  0.37680000   0.21312075
  0.37680000   0.57404831
  0.37680000   0.59150519
  0.37680000   0.97561175
  0.37680000   0.85529196
  0.37680000   0.21312073
  0.37680000   0.57404824
  0.37680000   0.59150515
  0.37680000   0.97561176
  0.37680000   0.85529199
  0.37680000   0.21312070
  0.37680000   0.57404817
  0.37680000   0.59150512
  0.37680000   0.97561177
  0.37680000   0.85529202
  0.37680000   0.21312068
  0.37680000   0.57404810
  0.37680000   0.59150508
  0.37680000   0.97561177
  0.37680000   0.85529204
  0.37680000   0.21312066
  0.37760000   0.57401082
  0.37760000   0.59008929
  0.37760000   0.97589821
  0.37760000   0.85523697
  0.37760000   0.21218883
  0.37760000   0.57401079
  0.37760000   0.59008933
  0.37760000   0.97589820
  0.37760000   0.85523698
  0.37760000   0.21218885
  0.37760000   0.57401077
  0.37760000   0.59008936
  0.37760000   0.97589820
  0.37760000   0.85523699
  0.37760000   0.21218887
  0.37760000   0.57401074
  0.37760000   0.59008940
  0.37760000   0.97589819
  0.37760000   0.85523699
  0.37760000   0.21218889
  0.37760000   0.57401072
  0.37760000   0.59008943
  0.37760000   0.97589818
  0.37760000   0.85523700
  0.37760000   0.21218891
  0.37760000   0.57401069
  0.37760000   0.59008946
  0.37760000   0.97589818
  0.37760000   0.85523701
  0.37760000   0.21218893
  0.37760000   0.57401066
  0.37760000   0.59008950
  0.37760000   0.97589817
  0.37760000   0.85523702
  0.37760000   0.21218895
  0.37760000   0.57401064
  0.37760000   0.59008953
  0.37760000   0.97589817
  0.37760000   0.85523703
  0.37760000   0.21218897
  0.37840000   0.21127399
  0.37840000   0.57402273
  0.37840000   0.58870125
  0.37840000   0.97618146
  0.37840000   0.85516331
  0.37840000   0.21127397
  0.37840000   0.57402266
  0.37840000   0.58870122
  0.37840000   0.97618147
  0.37840000   0.85516334
  0.37840000   0.21127394
  0.37840000   0.57402259
  0.37840000   0.58870119
  0.37840000   0.97618148
  0.37840000   0.85516337
  0.37840000   0.21127392
  0.37840000   0.57402252
  0.37840000   0.58870116
  0.37840000   0.97618148
  0.37840000   0.85516339
  0.37840000   0.21127390
  0.37840000   0.57402245
  0.37840000   0.58870112
  0.37840000   0.97618149
  0.37840000   0.85516341
  0.37840000   0.21127388
  0.37840000   0.57402238
  0.37840000   0.58870109
  0.37840000   0.97618150
  0.37840000   0.85516344
  0.37840000   0.21127386
  0.37840000   0.57402232
  0.37840000   0.58870106
  0.37840000   0.97618151
  0.37840000   0.85516346
  0.37840000   0.21127384
  0.37840000   0.57402225
  0.37840000   0.58870103
  0.37840000   0.97618152
  0.37840000   0.85516349
  0.37920000   0.21036598
  0.37920000   0.57407251
  0.37920000   0.58732552
  0.37920000   0.97646472
  0.37920000   0.85507530
  0.37920000   0.21036596
  0.37920000   0.57407244
  0.37920000   0.58732548
  0.37920000   0.97646473
  0.37920000   0.85507532
  0.37920000   0.21036593
  0.37920000   0.57407237
  0.37920000   0.58732545
  0.37920000   0.97646474
  0.37920000   0.85507535
  0.37920000   0.21036591
  0.37920000   0.57407230
  0.37920000   0.58732542
  0.37920000   0.97646474
  0.37920000   0.85507538
  0.37920000   0.21036589
  0.37920000   0.57407223
  0.37920000   0.58732538
  0.37920000   0.97646475
  0.37920000   0.85507540
  0.37920000   0.21036587
  0.37920000   0.57407216
  0.37920000   0.58732535
  0.37920000   0.97646476
  0.37920000   0.85507543
  0.37920000   0.21036584
  0.37920000   0.57407209
  0.37920000   0.58732532
  0.37920000   0.97646477
  0.37920000   0.85507545
  0.37920000   0.21036582
  0.37920000   0.57407202
  0.37920000   0.58732528
  0.37920000   0.97646478
  0.37920000   0.85507547
  0.38000000   0.85497226
  0.38000000   0.20946790
  0.38000000   0.57416190
  0.38000000   0.58596675
  0.38000000   0.97674693
  0.38000000   0.85497228
  0.38000000   0.20946787
  0.38000000   0.57416183
  0.38000000   0.58596671
  0.38000000   0.97674694
  0.38000000   0.85497231
  0.38000000   0.20946785
  0.38000000   0.57416176
  0.38000000   0.58596667
  0.38000000   0.97674695
  0.38000000   0.85497233
  0.38000000   0.20946782
  0.38000000   0.57416168
  0.38000000   0.58596664
  0.38000000   0.97674696
  0.38000000   0.85497236
  0.38000000   0.20946780
  0.38000000   0.57416161
  0.38000000   0.58596660
  0.38000000   0.97674697
  0.38000000   0.85497238
  0.38000000   0.20946777
  0.38000000   0.57416154
  0.38000000   0.58596657
  0.38000000   0.97674697
  0.38000000   0.85497241
  0.38000000   0.20946775
  0.38000000   0.57416148
  0.38000000   0.58596653
  0.38000000   0.97674698
  0.38000000   0.85497243
  0.38000000   0.20946772
  0.38000000   0.57416141
  0.38000000   0.58596650
  0.38000000   0.97674699
  0.38080000   0.85485507
  0.38080000   0.20857890
  0.38080000   0.57428875
  0.38080000   0.58462372
  0.38080000   0.97702831
  0.38080000   0.85485509
  0.38080000   0.20857888
  0.38080000   0.57428868
  0.38080000   0.58462370
  0.38080000   0.97702831
  0.38080000   0.85485512
  0.38080000   0.20857887
  0.38080000   0.57428862
  0.38080000   0.58462367
  0.38080000   0.97702832
  0.38080000   0.85485514
  0.38080000   0.20857885
  0.38080000   0.57428855
  0.38080000   0.58462365
  0.38080000   0.97702833
  0.38080000   0.85485516
  0.38080000   0.20857883
  0.38080000   0.57428849
  0.38080000   0.58462362
  0.38080000   0.97702834
  0.38080000   0.85485518
  0.38080000   0.20857881
  0.38080000   0.57428842
  0.38080000   0.58462359
  0.38080000   0.97702834
  0.38080000   0.85485521
  0.38080000   0.20857879
  0.38080000   0.57428836
  0.38080000   0.58462357
  0.38080000   0.97702835
  0.38080000   0.85485523
  0.38080000   0.20857877
  0.38080000   0.57428830
  0.38080000   0.58462354
  0.38080000   0.97702836
  0.38160000   0.58329680
  0.38160000   0.97730874
  0.38160000   0.85472422
  0.38160000   0.20769920
  0.38160000   0.57445176
  0.38160000   0.58329679
  0.38160000   0.97730874
  0.38160000   0.85472424
  0.38160000   0.20769919
  0.38160000   0.57445171
  0.38160000   0.58329679
  0.38160000   0.97730875
  0.38160000   0.85472426
  0.38160000   0.20769919
  0.38160000   0.57445165
  0.38160000   0.58329678
  0.38160000   0.97730875
  0.38160000   0.85472428
  0.38160000   0.20769919
  0.38160000   0.57445160
  0.38160000   0.58329678
  0.38160000   0.97730875
  0.38160000   0.85472430
  0.38160000   0.20769918
  0.38160000   0.57445155
  0.38160000   0.58329678
  0.38160000   0.97730875
  0.38160000   0.85472432
  0.38160000   0.20769918
  0.38160000   0.57445150
  0.38160000   0.58329677
  0.38160000   0.97730876
  0.38160000   0.85472433
  0.38160000   0.20769917
  0.38160000   0.57445145
  0.38160000   0.58329677
  0.38160000   0.97730876
  0.38160000   0.85472435
  0.38160000   0.20769917
  0.38160000   0.57445140
  0.38240000   0.20683226
  0.38240000   0.57465233
  0.38240000   0.58199120
  0.38240000   0.97758704
  0.38240000   0.85457926
  0.38240000   0.20683224
  0.38240000   0.57465226
  0.38240000   0.58199117
  0.38240000   0.97758705
  0.38240000   0.85457928
  0.38240000   0.20683222
  0.38240000   0.57465220
  0.38240000   0.58199114
  0.38240000   0.97758706
  0.38240000   0.85457931
  0.38240000   0.20683220
  0.38240000   0.57465213
  0.38240000   0.58199111
  0.38240000   0.97758707
  0.38240000   0.85457933
  0.38240000   0.20683218
  0.38240000   0.57465206
  0.38240000   0.58199108
  0.38240000   0.97758707
  0.38240000   0.85457935
  0.38240000   0.20683216
  0.38240000   0.57465200
  0.38240000   0.58199105
  0.38240000   0.97758708
  0.38240000   0.85457938
  0.38240000   0.20683214
  0.38240000   0.57465194
  0.38240000   0.58199102
  0.38240000   0.97758709
  0.38240000   0.85457940
  0.38240000   0.20683212
  0.38240000   0.57465187
  0.38240000   0.58199099
  0.38240000   0.97758710
  0.38240000   0.85457942
  0.38320000   0.97786465
  0.38320000   0.85442222
  0.38320000   0.20597358
  0.38320000   0.57488495
  0.38320000   0.58070031
  0.38320000   0.97786466
  0.38320000   0.85442225
  0.38320000   0.20597356
  0.38320000   0.57488488
  0.38320000   0.58070029
  0.38320000   0.97786466
  0.38320000   0.85442227
  0.38320000   0.20597354
  0.38320000   0.57488482
  0.38320000   0.58070027
  0.38320000   0.97786467
  0.38320000   0.85442229
  0.38320000   0.20597353
  0.38320000   0.57488476
  0.38320000   0.58070024
  0.38320000   0.97786468
  0.38320000   0.85442231
  0.38320000   0.20597351
  0.38320000   0.57488470
  0.38320000   0.58070022
  0.38320000   0.97786468
  0.38320000   0.85442233
  0.38320000   0.20597350
  0.38320000   0.57488464
  0.38320000   0.58070020
  0.38320000   0.97786469
  0.38320000   0.85442236
  0.38320000   0.20597348
  0.38320000   0.57488458
  0.38320000   0.58070018
  0.38320000   0.97786470
  0.38320000   0.85442238
  0.38320000   0.20597347
  0.38320000   0.57488452
  0.38320000   0.58070015
  0.38400000   0.57942924
  0.38400000   0.97814042
  0.38400000   0.85425283
  0.38400000   0.20512649
  0.38400000   0.57515070
  0.38400000   0.57942921
  0.38400000   0.97814043
  0.38400000   0.85425286
  0.38400000   0.20512647
  0.38400000   0.57515064
  0.38400000   0.57942917
  0.38400000   0.97814044
  0.38400000   0.85425288
  0.38400000   0.20512644
  0.38400000   0.57515057
  0.38400000   0.57942914
  0.38400000   0.97814045
  0.38400000   0.85425290
  0.38400000   0.20512642
  0.38400000   0.57515050
  0.38400000   0.57942911
  0.38400000   0.97814046
  0.38400000   0.85425293
  0.38400000   0.20512640
  0.38400000   0.57515044
  0.38400000   0.57942907
  0.38400000   0.97814047
  0.38400000   0.85425295
  0.38400000   0.20512638
  0.38400000   0.57515037
  0.38400000   0.57942904
  0.38400000   0.97814048
  0.38400000   0.85425297
  0.38400000   0.20512635
  0.38400000   0.57515031
  0.38400000   0.57942901
  0.38400000   0.97814049
  0.38400000   0.85425300
  0.38400000   0.20512633
  0.38400000   0.57515025
  0.38480000   0.97841558
  0.38480000   0.85407280
  0.38480000   0.20428731
  0.38480000   0.57544514
  0.38480000   0.57817250
  0.38480000   0.97841558
  0.38480000   0.85407282
  0.38480000   0.20428731
  0.38480000   0.57544509
  0.38480000   0.57817250
  0.38480000   0.97841558
  0.38480000   0.85407283
  0.38480000   0.20428731
  0.38480000   0.57544504
  0.38480000   0.57817251
  0.38480000   0.97841558
  0.38480000   0.85407285
  0.38480000   0.20428731
  0.38480000   0.57544500
  0.38480000   0.57817251
  0.38480000   0.97841558
  0.38480000   0.85407287
  0.38480000   0.20428732
  0.38480000   0.57544495
  0.38480000   0.57817252
  0.38480000   0.97841558
  0.38480000   0.85407288
  0.38480000   0.20428732
  0.38480000   0.57544490
  0.38480000   0.57817252
  0.38480000   0.97841558
  0.38480000   0.85407290
  0.38480000   0.20428732
  0.38480000   0.57544486
  0.38480000   0.57817252
  0.38480000   0.97841558
  0.38480000   0.85407292
  0.38480000   0.20428732
  0.38480000   0.57544481
  0.38480000   0.57817253
  0.38560000   0.57693874
  0.38560000   0.97868814
  0.38560000   0.85388129
  0.38560000   0.20346170
  0.38560000   0.57577063
  0.38560000   0.57693874
  0.38560000   0.97868814
  0.38560000   0.85388131
  0.38560000   0.20346170
  0.38560000   0.57577058
  0.38560000   0.57693874
  0.38560000   0.97868814
  0.38560000   0.85388133
  0.38560000   0.20346170
  0.38560000   0.57577053
  0.38560000   0.57693874
  0.38560000   0.97868814
  0.38560000   0.85388134
  0.38560000   0.20346170
  0.38560000   0.57577048
  0.38560000   0.57693873
  0.38560000   0.97868815
  0.38560000   0.85388136
  0.38560000   0.20346169
  0.38560000   0.57577043
  0.38560000   0.57693873
  0.38560000   0.97868815
  0.38560000   0.85388138
  0.38560000   0.20346169
  0.38560000   0.57577038
  0.38560000   0.57693873
  0.38560000   0.97868815
  0.38560000   0.85388140
  0.38560000   0.20346169
  0.38560000   0.57577033
  0.38560000   0.57693872
  0.38560000   0.97868815
  0.38560000   0.85388141
  0.38560000   0.20346168
  0.38560000   0.57577028
  0.38640000   0.57612418
  0.38640000   0.57572560
  0.38640000   0.97895863
  0.38640000   0.85367952
  0.38640000   0.20264802
  0.38640000   0.57612412
  0.38640000   0.57572558
  0.38640000   0.97895863
  0.38640000   0.85367954
  0.38640000   0.20264801
  0.38640000   0.57612406
  0.38640000   0.57572556
  0.38640000   0.97895864
  0.38640000   0.85367956
  0.38640000   0.20264799
  0.38640000   0.57612400
  0.38640000   0.57572554
  0.38640000   0.97895865
  0.38640000   0.85367958
  0.38640000   0.20264798
  0.38640000   0.57612394
  0.38640000   0.57572552
  0.38640000   0.97895865
  0.38640000   0.85367960
  0.38640000   0.20264796
  0.38640000   0.57612388
  0.38640000   0.57572550
  0.38640000   0.97895866
  0.38640000   0.85367962
  0.38640000   0.20264795
  0.38640000   0.57612383
  0.38640000   0.57572548
  0.38640000   0.97895867
  0.38640000   0.85367964
  0.38640000   0.20264793
  0.38640000   0.57612377
  0.38640000   0.57572546
  0.38640000   0.97895867
  0.38640000   0.85367966
  0.38640000   0.20264792
  0.38720000   0.85346850
  0.38720000   0.20184510
  0.38720000   0.57650308
  0.38720000   0.57453141
  0.38720000   0.97922742
  0.38720000   0.85346852
  0.38720000   0.20184508
  0.38720000   0.57650302
  0.38720000   0.57453138
  0.38720000   0.97922742
  0.38720000   0.85346854
  0.38720000   0.20184506
  0.38720000   0.57650296
  0.38720000   0.57453136
  0.38720000   0.97922743
  0.38720000   0.85346856
  0.38720000   0.20184504
  0.38720000   0.57650290
  0.38720000   0.57453133
  0.38720000   0.97922744
  0.38720000   0.85346858
  0.38720000   0.20184503
  0.38720000   0.57650284
  0.38720000   0.57453131
  0.38720000   0.97922744
  0.38720000   0.85346860
  0.38720000   0.20184501
  0.38720000   0.57650279
  0.38720000   0.57453128
  0.38720000   0.97922745
  0.38720000   0.85346862
  0.38720000   0.20184499
  0.38720000   0.57650273
  0.38720000   0.57453126
  0.38720000   0.97922746
  0.38720000   0.85346864
  0.38720000   0.20184498
  0.38720000   0.57650267
  0.38720000   0.57453124
  0.38720000   0.97922746
  0.38800000   0.57690649
  0.38800000   0.57335807
  0.38800000   0.97949404
  0.38800000   0.85324871
  0.38800000   0.20105409
  0.38800000   0.57690642
  0.38800000   0.57335804
  0.38800000   0.97949405
  0.38800000   0.85324873
  0.38800000   0.20105407
  0.38800000   0.57690636
  0.38800000   0.57335801
  0.38800000   0.97949406
  0.38800000   0.85324875
  0.38800000   0.20105405
  0.38800000   0.57690630
  0.38800000   0.57335798
  0.38800000   0.97949407
  0.38800000   0.85324877
  0.38800000   0.20105403
  0.38800000   0.57690624
  0.38800000   0.57335795
  0.38800000   0.97949408
  0.38800000   0.85324879
  0.38800000   0.20105400
  0.38800000   0.57690618
  0.38800000   0.57335792
  0.38800000   0.97949408
  0.38800000   0.85324881
  0.38800000   0.20105398
  0.38800000   0.57690612
  0.38800000   0.57335789
  0.38800000   0.97949409
  0.38800000   0.85324883
  0.38800000   0.20105396
  0.38800000   0.57690606
  0.38800000   0.57335786
  0.38800000   0.97949410
  0.38800000   0.85324885
  0.38800000   0.20105394
  0.38880000   0.97975860
  0.38880000   0.85302089
  0.38880000   0.20027467
  0.38880000   0.57733232
  0.38880000   0.57220511
  0.38880000   0.97975860
  0.38880000   0.85302092
  0.38880000   0.20027465
  0.38880000   0.57733226
  0.38880000   0.57220508
  0.38880000   0.97975861
  0.38880000   0.85302094
  0.38880000   0.20027464
  0.38880000   0.57733220
  0.38880000   0.57220505
  0.38880000   0.97975862
  0.38880000   0.85302096
  0.38880000   0.20027462
  0.38880000   0.57733214
  0.38880000   0.57220503
  0.38880000   0.97975863
  0.38880000   0.85302098
  0.38880000   0.20027460
  0.38880000   0.57733208
  0.38880000   0.57220500
  0.38880000   0.97975864
  0.38880000   0.85302100
  0.38880000   0.20027458
  0.38880000   0.57733202
  0.38880000   0.57220497
  0.38880000   0.97975864
  0.38880000   0.85302102
  0.38880000   0.20027456
  0.38880000   0.57733197
  0.38880000   0.57220495
  0.38880000   0.97975865
  0.38880000   0.85302104
  0.38880000   0.20027454
  0.38880000   0.57733191
  0.38880000   0.57220492
  0.38960000   0.85278557
  0.38960000   0.19950785
  0.38960000   0.57777956
  0.38960000   0.57107418
  0.38960000   0.98002069
  0.38960000   0.85278560
  0.38960000   0.19950783
  0.38960000   0.57777950
  0.38960000   0.57107415
  0.38960000   0.98002070
  0.38960000   0.85278562
  0.38960000   0.19950781
  0.38960000   0.57777944
  0.38960000   0.57107412
  0.38960000   0.98002071
  0.38960000   0.85278564
  0.38960000   0.19950779
  0.38960000   0.57777938
  0.38960000   0.57107409
  0.38960000   0.98002071
  0.38960000   0.85278566
  0.38960000   0.19950777
  0.38960000   0.57777932
  0.38960000   0.57107406
  0.38960000   0.98002072
  0.38960000   0.85278568
  0.38960000   0.19950775
  0.38960000   0.57777927
  0.38960000   0.57107404
  0.38960000   0.98002073
  0.38960000   0.85278570
  0.38960000   0.19950773
  0.38960000   0.57777921
  0.38960000   0.57107401
  0.38960000   0.98002074
  0.38960000   0.85278572
  0.38960000   0.19950771
  0.38960000   0.57777915
  0.38960000   0.57107398
  0.38960000   0.98002075
  0.39040000   0.98028028
  0.39040000   0.85254347
  0.39040000   0.19875352
  0.39040000   0.57824638
  0.39040000   0.56996519
  0.39040000   0.98028029
  0.39040000   0.85254349
  0.39040000   0.19875350
  0.39040000   0.57824632
  0.39040000   0.56996515
  0.39040000   0.98028030
  0.39040000   0.85254351
  0.39040000   0.19875348
  0.39040000   0.57824626
  0.39040000   0.56996512
  0.39040000   0.98028031
  0.39040000   0.85254353
  0.39040000   0.19875346
  0.39040000   0.57824620
  0.39040000   0.56996509
  0.39040000   0.98028032
  0.39040000   0.85254355
  0.39040000   0.19875344
  0.39040000   0.57824615
  0.39040000   0.56996506
  0.39040000   0.98028033
  0.39040000   0.85254357
  0.39040000   0.19875341
  0.39040000   0.57824609
  0.39040000   0.56996503
  0.39040000   0.98028033
  0.39040000   0.85254359
  0.39040000   0.19875339
  0.39040000   0.57824603
  0.39040000   0.56996499
  0.39040000   0.98028034
  0.39040000   0.85254361
  0.39040000   0.19875337
  0.39040000   0.57824597
  0.39040000   0.56996496
  0.39120000   0.85229530
  0.39120000   0.19801133
  0.39120000   0.57873101
  0.39120000   0.56887766
  0.39120000   0.98053749
  0.39120000   0.85229532
  0.39120000   0.19801131
  0.39120000   0.57873096
  0.39120000   0.56887763
  0.39120000   0.98053749
  0.39120000   0.85229534
  0.39120000   0.19801129
  0.39120000   0.57873090
  0.39120000   0.56887760
  0.39120000   0.98053750
  0.39120000   0.85229536
  0.39120000   0.19801127
  0.39120000   0.57873084
  0.39120000   0.56887757
  0.39120000   0.98053751
  0.39120000   0.85229538
  0.39120000   0.19801125
  0.39120000   0.57873079
  0.39120000   0.56887754
  0.39120000   0.98053752
  0.39120000   0.85229540
  0.39120000   0.19801123
  0.39120000   0.57873073
  0.39120000   0.56887752
  0.39120000   0.98053752
  0.39120000   0.85229541
  0.39120000   0.19801121
  0.39120000   0.57873067
  0.39120000   0.56887749
  0.39120000   0.98053753
  0.39120000   0.85229543
  0.39120000   0.19801119
  0.39120000   0.57873062
  0.39120000   0.56887746
  0.39120000   0.98053754
  0.39200000   0.19728214
  0.39200000   0.57923231
  0.39200000   0.56781295
  0.39200000   0.98079191
  0.39200000   0.85204156
  0.39200000   0.19728212
  0.39200000   0.57923225
  0.39200000   0.56781292
  0.39200000   0.98079192
  0.39200000   0.85204158
  0.39200000   0.19728210
  0.39200000   0.57923219
  0.39200000   0.56781289
  0.39200000   0.98079193
  0.39200000   0.85204160
  0.39200000   0.19728208
  0.39200000   0.57923213
  0.39200000   0.56781286
  0.39200000   0.98079194
  0.39200000   0.85204162
  0.39200000   0.19728206
  0.39200000   0.57923208
  0.39200000   0.56781284
  0.39200000   0.98079194
  0.39200000   0.85204164
  0.39200000   0.19728204
  0.39200000   0.57923202
  0.39200000   0.56781281
  0.39200000   0.98079195
  0.39200000   0.85204166
  0.39200000   0.19728202
  0.39200000   0.57923197
  0.39200000   0.56781278
  0.39200000   0.98079196
  0.39200000   0.85204168
  0.39200000   0.19728201
  0.39200000   0.57923191
  0.39200000   0.56781275
  0.39200000   0.98079197
  0.39200000   0.85204170
  0.39280000   0.19656553
  0.39280000   0.57974852
  0.39280000   0.56677046
  0.39280000   0.98104367
  0.39280000   0.85178292
  0.39280000   0.19656552
  0.39280000   0.57974846
  0.39280000   0.56677043
  0.39280000   0.98104368
  0.39280000   0.85178294
  0.39280000   0.19656550
  0.39280000   0.57974840
  0.39280000   0.56677041
  0.39280000   0.98104369
  0.39280000   0.85178296
  0.39280000   0.19656548
  0.39280000   0.57974835
  0.39280000   0.56677038
  0.39280000   0.98104370
  0.39280000   0.85178298
  0.39280000   0.19656546
  0.39280000   0.57974829
  0.39280000   0.56677035
  0.39280000   0.98104370
  0.39280000   0.85178299
  0.39280000   0.19656544
  0.39280000   0.57974824
  0.39280000   0.56677032
  0.39280000   0.98104371
  0.39280000   0.85178301
  0.39280000   0.19656542
  0.39280000   0.57974819
  0.39280000   0.56677030
  0.39280000   0.98104372
  0.39280000   0.85178303
  0.39280000   0.19656541
  0.39280000   0.57974813
  0.39280000   0.56677027
  0.39280000   0.98104373
  0.39280000   0.85178305
  0.39360000   0.98129255
  0.39360000   0.85151988
  0.39360000   0.19586194
  0.39360000   0.58027839
  0.39360000   0.56575085
  0.39360000   0.98129256
  0.39360000   0.85151990
  0.39360000   0.19586192
  0.39360000   0.58027834
  0.39360000   0.56575082
  0.39360000   0.98129257
  0.39360000   0.85151992
  0.39360000   0.19586190
  0.39360000   0.58027828
  0.39360000   0.56575079
  0.39360000   0.98129258
  0.39360000   0.85151994
  0.39360000   0.19586188
  0.39360000   0.58027823
  0.39360000   0.56575076
  0.39360000   0.98129258
  0.39360000   0.85151996
  0.39360000   0.19586186
  0.39360000   0.58027817
  0.39360000   0.56575073
  0.39360000   0.98129259
  0.39360000   0.85151998
  0.39360000   0.19586184
  0.39360000   0.58027812
  0.39360000   0.56575071
  0.39360000   0.98129260
  0.39360000   0.85151999
  0.39360000   0.19586182
  0.39360000   0.58027807
  0.39360000   0.56575068
  0.39360000   0.98129261
  0.39360000   0.85152001
  0.39360000   0.19586180
  0.39360000   0.58027801
  0.39360000   0.56575065
  0.39440000   0.58082041
  0.39440000   0.56475336
  0.39440000   0.98153870
  0.39440000   0.85125312
  0.39440000   0.19517080
  0.39440000   0.58082036
  0.39440000   0.56475334
  0.39440000   0.98153871
  0.39440000   0.85125313
  0.39440000   0.19517078
  0.39440000   0.58082030
  0.39440000   0.56475331
  0.39440000   0.98153872
  0.39440000   0.85125315
  0.39440000   0.19517077
  0.39440000   0.58082025
  0.39440000   0.56475328
  0.39440000   0.98153872
  0.39440000   0.85125317
  0.39440000   0.19517075
  0.39440000   0.58082020
  0.39440000   0.56475325
  0.39440000   0.98153873
  0.39440000   0.85125319
  0.39440000   0.19517073
  0.39440000   0.58082014
  0.39440000   0.56475322
  0.39440000   0.98153874
  0.39440000   0.85125321
  0.39440000   0.19517071
  0.39440000   0.58082009
  0.39440000   0.56475320
  0.39440000   0.98153875
  0.39440000   0.85125323
  0.39440000   0.19517069
  0.39440000   0.58082004
  0.39440000   0.56475317
  0.39440000   0.98153875
  0.39440000   0.85125324
  0.39440000   0.19517067
  0.39520000   0.58137336
  0.39520000   0.56377853
  0.39520000   0.98178191
  0.39520000   0.85098305
  0.39520000   0.19449254
  0.39520000   0.58137331
  0.39520000   0.56377850
  0.39520000   0.98178192
  0.39520000   0.85098307
  0.39520000   0.19449252
  0.39520000   0.58137325
  0.39520000   0.56377847
  0.39520000   0.98178193
  0.39520000   0.85098309
  0.39520000   0.19449250
  0.39520000   0.58137320
  0.39520000   0.56377844
  0.39520000   0.98178193
  0.39520000   0.85098310
  0.39520000   0.19449248
  0.39520000   0.58137315
  0.39520000   0.56377841
  0.39520000   0.98178194
  0.39520000   0.85098312
  0.39520000   0.19449246
  0.39520000   0.58137310
  0.39520000   0.56377838
  0.39520000   0.98178195
  0.39520000   0.85098314
  0.39520000   0.19449244
  0.39520000   0.58137304
  0.39520000   0.56377835
  0.39520000   0.98178196
  0.39520000   0.85098316
  0.39520000   0.19449242
  0.39520000   0.58137299
  0.39520000   0.56377832
  0.39520000   0.98178196
  0.39520000   0.85098317
  0.39520000   0.19449240
  0.39600000   0.98202206
  0.39600000   0.85071014
  0.39600000   0.19382729
  0.39600000   0.58193608
  0.39600000   0.56282656
  0.39600000   0.98202207
  0.39600000   0.85071016
  0.39600000   0.19382727
  0.39600000   0.58193603
  0.39600000   0.56282652
  0.39600000   0.98202208
  0.39600000   0.85071018
  0.39600000   0.19382724
  0.39600000   0.58193597
  0.39600000   0.56282649
  0.39600000   0.98202209
  0.39600000   0.85071020
  0.39600000   0.19382722
  0.39600000   0.58193592
  0.39600000   0.56282645
  0.39600000   0.98202210
  0.39600000   0.85071022
  0.39600000   0.19382719
  0.39600000   0.58193586
  0.39600000   0.56282641
  0.39600000   0.98202211
  0.39600000   0.85071023
  0.39600000   0.19382717
  0.39600000   0.58193581
  0.39600000   0.56282638
  0.39600000   0.98202212
  0.39600000   0.85071025
  0.39600000   0.19382715
  0.39600000   0.58193576
  0.39600000   0.56282634
  0.39600000   0.98202213
  0.39600000   0.85071027
  0.39600000   0.19382712
  0.39600000   0.58193571
  0.39600000   0.56282631
  0.39680000   0.98225948
  0.39680000   0.85043499
  0.39680000   0.19317403
  0.39680000   0.58250714
  0.39680000   0.56189596
  0.39680000   0.98225949
  0.39680000   0.85043501
  0.39680000   0.19317401
  0.39680000   0.58250708
  0.39680000   0.56189592
  0.39680000   0.98225950
  0.39680000   0.85043503
  0.39680000   0.19317398
  0.39680000   0.58250703
  0.39680000   0.56189589
  0.39680000   0.98225951
  0.39680000   0.85043505
  0.39680000   0.19317396
  0.39680000   0.58250697
  0.39680000   0.56189585
  0.39680000   0.98225952
  0.39680000   0.85043506
  0.39680000   0.19317393
  0.39680000   0.58250692
  0.39680000   0.56189581
  0.39680000   0.98225953
  0.39680000   0.85043508
  0.39680000   0.19317391
  0.39680000   0.58250687
  0.39680000   0.56189578
  0.39680000   0.98225954
  0.39680000   0.85043510
  0.39680000   0.19317388
  0.39680000   0.58250682
  0.39680000   0.56189574
  0.39680000   0.98225955
  0.39680000   0.85043512
  0.39680000   0.19317386
  0.39680000   0.58250677
  0.39680000   0.56189570
  0.39760000   0.98249399
  0.39760000   0.85015795
  0.39760000   0.19253306
  0.39760000   0.58308557
  0.39760000   0.56098712
  0.39760000   0.98249400
  0.39760000   0.85015797
  0.39760000   0.19253303
  0.39760000   0.58308551
  0.39760000   0.56098708
  0.39760000   0.98249401
  0.39760000   0.85015799
  0.39760000   0.19253300
  0.39760000   0.58308546
  0.39760000   0.56098704
  0.39760000   0.98249402
  0.39760000   0.85015801
  0.39760000   0.19253298
  0.39760000   0.58308541
  0.39760000   0.56098700
  0.39760000   0.98249403
  0.39760000   0.85015802
  0.39760000   0.19253295
  0.39760000   0.58308535
  0.39760000   0.56098697
  0.39760000   0.98249404
  0.39760000   0.85015804
  0.39760000   0.19253293
  0.39760000   0.58308530
  0.39760000   0.56098693
  0.39760000   0.98249405
  0.39760000   0.85015806
  0.39760000   0.19253290
  0.39760000   0.58308525
  0.39760000   0.56098689
  0.39760000   0.98249406
  0.39760000   0.85015808
  0.39760000   0.19253288
  0.39760000   0.58308520
  0.39760000   0.56098686
  0.39840000   0.98272560
  0.39840000   0.84987942
  0.39840000   0.19190420
  0.39840000   0.58367035
  0.39840000   0.56009974
  0.39840000   0.98272561
  0.39840000   0.84987944
  0.39840000   0.19190417
  0.39840000   0.58367030
  0.39840000   0.56009970
  0.39840000   0.98272562
  0.39840000   0.84987946
  0.39840000   0.19190415
  0.39840000   0.58367024
  0.39840000   0.56009966
  0.39840000   0.98272563
  0.39840000   0.84987947
  0.39840000   0.19190412
  0.39840000   0.58367019
  0.39840000   0.56009963
  0.39840000   0.98272564
  0.39840000   0.84987949
  0.39840000   0.19190410
  0.39840000   0.58367014
  0.39840000   0.56009959
  0.39840000   0.98272565
  0.39840000   0.84987951
  0.39840000   0.19190407
  0.39840000   0.58367009
  0.39840000   0.56009955
  0.39840000   0.98272566
  0.39840000   0.84987953
  0.39840000   0.19190405
  0.39840000   0.58367004
  0.39840000   0.56009951
  0.39840000   0.98272567
  0.39840000   0.84987954
  0.39840000   0.19190402
  0.39840000   0.58366999
  0.39840000   0.56009948
  0.39920000   0.98295432
  0.39920000   0.84959976
  0.39920000   0.19128727
  0.39920000   0.58426053
  0.39920000   0.55923350
  0.39920000   0.98295433
  0.39920000   0.84959978
  0.39920000   0.19128725
  0.39920000   0.58426048
  0.39920000   0.55923346
  0.39920000   0.98295434
  0.39920000   0.84959980
  0.39920000   0.19128722
  0.39920000   0.58426043
  0.39920000   0.55923342
  0.39920000   0.98295435
  0.39920000   0.84959981
  0.39920000   0.19128719
  0.39920000   0.58426038
  0.39920000   0.55923338
  0.39920000   0.98295436
  0.39920000   0.84959983
  0.39920000   0.19128717
  0.39920000   0.58426033
  0.39920000   0.55923334
  0.39920000   0.98295437
  0.39920000   0.84959985
  0.39920000   0.19128714
  0.39920000   0.58426028
  0.39920000   0.55923331
  0.39920000   0.98295438
  0.39920000   0.84959986
  0.39920000   0.19128712
  0.39920000   0.58426023
  0.39920000   0.55923327
  0.39920000   0.98295439
  0.39920000   0.84959988
  0.39920000   0.19128710
  0.39920000   0.58426018
  0.39920000   0.55923323
  0.40000000   0.98318017
  0.40000000   0.84931931
  0.40000000   0.19068205
  0.40000000   0.58485524
  0.40000000   0.55838800
  0.40000000   0.98318018
  0.40000000   0.84931933
  0.40000000   0.19068202
  0.40000000   0.58485518
  0.40000000   0.55838796
  0.40000000   0.98318019
  0.40000000   0.84931935
  0.40000000   0.19068200
  0.40000000   0.58485513
  0.40000000   0.55838792
  0.40000000   0.98318020
  0.40000000   0.84931936
  0.40000000   0.19068197
  0.40000000   0.58485508
  0.40000000   0.55838788
  0.40000000   0.98318021
  0.40000000   0.84931938
  0.40000000   0.19068195
  0.40000000   0.58485503
  0.40000000   0.55838784
  0.40000000   0.98318022
  0.40000000   0.84931940
  0.40000000   0.19068192
  0.40000000   0.58485498
  0.40000000   0.55838780
  0.40000000   0.98318023
  0.40000000   0.84931941
  0.40000000   0.19068190
  0.40000000   0.58485493
  0.40000000   0.55838777
  0.40000000   0.98318024
  0.40000000   0.84931943
  0.40000000   0.19068187
  0.40000000   0.58485489
  0.40000000   0.55838773
  0.40080000   0.98340319
  0.40080000   0.84903838
  0.40080000   0.19008828
  0.40080000   0.58545364
  0.40080000   0.55756281
  0.40080000   0.98340320
  0.40080000   0.84903839
  0.40080000   0.19008826
  0.40080000   0.58545359
  0.40080000   0.55756277
  0.40080000   0.98340321
  0.40080000   0.84903841
  0.40080000   0.19008823
  0.40080000   0.58545354
  0.40080000   0.55756274
  0.40080000   0.98340322
  0.40080000   0.84903843
  0.40080000   0.19008820
  0.40080000   0.58545349
  0.40080000   0.55756270
  0.40080000   0.98340323
  0.40080000   0.84903844
  0.40080000   0.19008818
  0.40080000   0.58545344
  0.40080000   0.55756266
  0.40080000   0.98340324
  0.40080000   0.84903846
  0.40080000   0.19008815
  0.40080000   0.58545339
  0.40080000   0.55756262
  0.40080000   0.98340325
  0.40080000   0.84903848
  0.40080000   0.19008813
  0.40080000   0.58545334
  0.40080000   0.55756258
  0.40080000   0.98340326
  0.40080000   0.84903849
  0.40080000   0.19008811
  0.40080000   0.58545329
  0.40080000   0.55756255
  0.40160000   0.58605498
  0.40160000   0.55675729
  0.40160000   0.98362348
  0.40160000   0.84875726
  0.40160000   0.18950555
  0.40160000   0.58605493
  0.40160000   0.55675725
  0.40160000   0.98362349
  0.40160000   0.84875728
  0.40160000   0.18950552
  0.40160000   0.58605488
  0.40160000   0.55675721
  0.40160000   0.98362350
  0.40160000   0.84875729
  0.40160000   0.18950550
  0.40160000   0.58605483
  0.40160000   0.55675718
  0.40160000   0.98362351
  0.40160000   0.84875731
  0.40160000   0.18950547
  0.40160000   0.58605478
  0.40160000   0.55675714
  0.40160000   0.98362352
  0.40160000   0.84875732
  0.40160000   0.18950545
  0.40160000   0.58605473
  0.40160000   0.55675711
  0.40160000   0.98362353
  0.40160000   0.84875734
  0.40160000   0.18950543
  0.40160000   0.58605469
  0.40160000   0.55675707
  0.40160000   0.98362354
  0.40160000   0.84875735
  0.40160000   0.18950541
  0.40160000   0.58605464
  0.40160000   0.55675704
  0.40160000   0.98362355
  0.40160000   0.84875737
  0.40160000   0.18950538
  0.40240000   0.58665861
  0.40240000   0.55597152
  0.40240000   0.98384093
  0.40240000   0.84847616
  0.40240000   0.18893401
  0.40240000   0.58665856
  0.40240000   0.55597148
  0.40240000   0.98384094
  0.40240000   0.84847617
  0.40240000   0.18893399
  0.40240000   0.58665851
  0.40240000   0.55597145
  0.40240000   0.98384094
  0.40240000   0.84847619
  0.40240000   0.18893396
  0.40240000   0.58665846
  0.40240000   0.55597141
  0.40240000   0.98384095
  0.40240000   0.84847621
  0.40240000   0.18893394
  0.40240000   0.58665842
  0.40240000   0.55597138
  0.40240000   0.98384096
  0.40240000   0.84847622
  0.40240000   0.18893392
  0.40240000   0.58665837
  0.40240000   0.55597134
  0.40240000   0.98384097
  0.40240000   0.84847624
  0.40240000   0.18893389
  0.40240000   0.58665832
  0.40240000   0.55597131
  0.40240000   0.98384098
  0.40240000   0.84847625
  0.40240000   0.18893387
  0.40240000   0.58665828
  0.40240000   0.55597127
  0.40240000   0.98384099
  0.40240000   0.84847627
  0.40240000   0.18893385
  0.40320000   0.55520433
  0.40320000   0.98405576
  0.40320000   0.84819535
  0.40320000   0.18837290
  0.40320000   0.58726378
  0.40320000   0.55520430
  0.40320000   0.98405576
  0.40320000   0.84819537
  0.40320000   0.18837288
  0.40320000   0.58726373
  0.40320000   0.55520426
  0.40320000   0.98405577
  0.40320000   0.84819538
  0.40320000   0.18837286
  0.40320000   0.58726369
  0.40320000   0.55520423
  0.40320000   0.98405578
  0.40320000   0.84819540
  0.40320000   0.18837284
  0.40320000   0.58726364
  0.40320000   0.55520420
  0.40320000   0.98405579
  0.40320000   0.84819541
  0.40320000   0.18837282
  0.40320000   0.58726359
  0.40320000   0.55520417
  0.40320000   0.98405580
  0.40320000   0.84819543
  0.40320000   0.18837280
  0.40320000   0.58726355
  0.40320000   0.55520414
  0.40320000   0.98405581
  0.40320000   0.84819544
  0.40320000   0.18837277
  0.40320000   0.58726350
  0.40320000   0.55520411
  0.40320000   0.98405581
  0.40320000   0.84819546
  0.40320000   0.18837275
  0.40320000   0.58726346
  0.40400000   0.84791499
  0.40400000   0.18782260
  0.40400000   0.58787016
  0.40400000   0.55445617
  0.40400000   0.98426779
  0.40400000   0.84791501
  0.40400000   0.18782258
  0.40400000   0.58787011
  0.40400000   0.55445614
  0.40400000   0.98426780
  0.40400000   0.84791502
  0.40400000   0.18782255
  0.40400000   0.58787007
  0.40400000   0.55445610
  0.40400000   0.98426780
  0.40400000   0.84791504
  0.40400000   0.18782253
  0.40400000   0.58787002
  0.40400000   0.55445607
  0.40400000   0.98426781
  0.40400000   0.84791505
  0.40400000   0.18782251
  0.40400000   0.58786997
  0.40400000   0.55445603
  0.40400000   0.98426782
  0.40400000   0.84791507
  0.40400000   0.18782249
  0.40400000   0.58786993
  0.40400000   0.55445600
  0.40400000   0.98426783
  0.40400000   0.84791508
  0.40400000   0.18782247
  0.40400000   0.58786988
  0.40400000   0.55445597
  0.40400000   0.98426784
  0.40400000   0.84791509
  0.40400000   0.18782245
  0.40400000   0.58786984
  0.40400000   0.55445594
  0.40400000   0.98426785
  0.40480000   0.55372645
  0.40480000   0.98447710
  0.40480000   0.84763529
  0.40480000   0.18728269
  0.40480000   0.58847709
  0.40480000   0.55372641
  0.40480000   0.98447711
  0.40480000   0.84763530
  0.40480000   0.18728266
  0.40480000   0.58847705
  0.40480000   0.55372637
  0.40480000   0.98447712
  0.40480000   0.84763532
  0.40480000   0.18728264
  0.40480000   0.58847700
  0.40480000   0.55372633
  0.40480000   0.98447713
  0.40480000   0.84763533
  0.40480000   0.18728261
  0.40480000   0.58847695
  0.40480000   0.55372629
  0.40480000   0.98447714
  0.40480000   0.84763535
  0.40480000   0.18728259
  0.40480000   0.58847691
  0.40480000   0.55372625
  0.40480000   0.98447715
  0.40480000   0.84763536
  0.40480000   0.18728256
  0.40480000   0.58847686
  0.40480000   0.55372621
  0.40480000   0.98447716
  0.40480000   0.84763538
  0.40480000   0.18728254
  0.40480000   0.58847682
  0.40480000   0.55372617
  0.40480000   0.98447717
  0.40480000   0.84763539
  0.40480000   0.18728251
  0.40480000   0.58847677
  0.40560000   0.18675008
  0.40560000   0.58908370
  0.40560000   0.55301044
  0.40560000   0.98468483
  0.40560000   0.84735658
  0.40560000   0.18675008
  0.40560000   0.58908366
  0.40560000   0.55301045
  0.40560000   0.98468483
  0.40560000   0.84735659
  0.40560000   0.18675008
  0.40560000   0.58908361
  0.40560000   0.55301045
  0.40560000   0.98468483
  0.40560000   0.84735660
  0.40560000   0.18675008
  0.40560000   0.58908357
  0.40560000   0.55301045
  0.40560000   0.98468483
  0.40560000   0.84735662
  0.40560000   0.18675008
  0.40560000   0.58908353
  0.40560000   0.55301044
  0.40560000   0.98468483
  0.40560000   0.84735663
  0.40560000   0.18675008
  0.40560000   0.58908349
  0.40560000   0.55301044
  0.40560000   0.98468483
  0.40560000   0.84735664
  0.40560000   0.18675008
  0.40560000   0.58908345
  0.40560000   0.55301044
  0.40560000   0.98468483
  0.40560000   0.84735665
  0.40560000   0.18675008
  0.40560000   0.58908341
  0.40560000   0.55301044
  0.40560000   0.98468483
  0.40560000   0.84735667
  0.40640000   0.98488838
  0.40640000   0.84707854
  0.40640000   0.18623150
  0.40640000   0.58969068
  0.40640000   0.55231794
  0.40640000   0.98488839
  0.40640000   0.84707855
  0.40640000   0.18623148
  0.40640000   0.58969064
  0.40640000   0.55231790
  0.40640000   0.98488840
  0.40640000   0.84707857
  0.40640000   0.18623145
  0.40640000   0.58969059
  0.40640000   0.55231787
  0.40640000   0.98488841
  0.40640000   0.84707858
  0.40640000   0.18623143
  0.40640000   0.58969055
  0.40640000   0.55231783
  0.40640000   0.98488842
  0.40640000   0.84707860
  0.40640000   0.18623140
  0.40640000   0.58969050
  0.40640000   0.55231779
  0.40640000   0.98488843
  0.40640000   0.84707861
  0.40640000   0.18623138
  0.40640000   0.58969046
  0.40640000   0.55231776
  0.40640000   0.98488844
  0.40640000   0.84707863
  0.40640000   0.18623136
  0.40640000   0.58969041
  0.40640000   0.55231772
  0.40640000   0.98488845
  0.40640000   0.84707864
  0.40640000   0.18623133
  0.40640000   0.58969037
  0.40640000   0.55231769
  0.40720000   0.59029647
  0.40720000   0.55163753
  0.40720000   0.98509067
  0.40720000   0.84680181
  0.40720000   0.18571914
  0.40720000   0.59029643
  0.40720000   0.55163751
  0.40720000   0.98509068
  0.40720000   0.84680182
  0.40720000   0.18571913
  0.40720000   0.59029638
  0.40720000   0.55163749
  0.40720000   0.98509068
  0.40720000   0.84680183
  0.40720000   0.18571912
  0.40720000   0.59029634
  0.40720000   0.55163747
  0.40720000   0.98509069
  0.40720000   0.84680185
  0.40720000   0.18571910
  0.40720000   0.59029630
  0.40720000   0.55163745
  0.40720000   0.98509069
  0.40720000   0.84680186
  0.40720000   0.18571909
  0.40720000   0.59029625
  0.40720000   0.55163742
  0.40720000   0.98509070
  0.40720000   0.84680187
  0.40720000   0.18571908
  0.40720000   0.59029621
  0.40720000   0.55163740
  0.40720000   0.98509070
  0.40720000   0.84680189
  0.40720000   0.18571907
  0.40720000   0.59029617
  0.40720000   0.55163738
  0.40720000   0.98509071
  0.40720000   0.84680190
  0.40720000   0.18571905
  0.40800000   0.59090140
  0.40800000   0.55097542
  0.40800000   0.98528999
  0.40800000   0.84652619
  0.40800000   0.18521739
  0.40800000   0.59090136
  0.40800000   0.55097539
  0.40800000   0.98528999
  0.40800000   0.84652621
  0.40800000   0.18521737
  0.40800000   0.59090131
  0.40800000   0.55097536
  0.40800000   0.98529000
  0.40800000   0.84652622
  0.40800000   0.18521735
  0.40800000   0.59090127
  0.40800000   0.55097533
  0.40800000   0.98529001
  0.40800000   0.84652623
  0.40800000   0.18521733
  0.40800000   0.59090123
  0.40800000   0.55097530
  0.40800000   0.98529002
  0.40800000   0.84652625
  0.40800000   0.18521732
  0.40800000   0.59090119
  0.40800000   0.55097527
  0.40800000   0.98529002
  0.40800000   0.84652626
  0.40800000   0.18521730
  0.40800000   0.59090114
  0.40800000   0.55097524
  0.40800000   0.98529003
  0.40800000   0.84652627
  0.40800000   0.18521728
  0.40800000   0.59090110
  0.40800000   0.55097521
  0.40800000   0.98529004
  0.40800000   0.84652628
  0.40800000   0.18521726
  0.40880000   0.98548724
  0.40880000   0.84625192
  0.40880000   0.18472371
  0.40880000   0.59150483
  0.40880000   0.55032784
  0.40880000   0.98548725
  0.40880000   0.84625193
  0.40880000   0.18472369
  0.40880000   0.59150479
  0.40880000   0.55032782
  0.40880000   0.98548726
  0.40880000   0.84625195
  0.40880000   0.18472368
  0.40880000   0.59150475
  0.40880000   0.55032779
  0.40880000   0.98548726
  0.40880000   0.84625196
  0.40880000   0.18472366
  0.40880000   0.59150470
  0.40880000   0.55032777
  0.40880000   0.98548727
  0.40880000   0.84625197
  0.40880000   0.18472364
  0.40880000   0.59150466
  0.40880000   0.55032774
  0.40880000   0.98548728
  0.40880000   0.84625199
  0.40880000   0.18472363
  0.40880000   0.59150462
  0.40880000   0.55032772
  0.40880000   0.98548728
  0.40880000   0.84625200
  0.40880000   0.18472361
  0.40880000   0.59150458
  0.40880000   0.55032769
  0.40880000   0.98548729
  0.40880000   0.84625201
  0.40880000   0.18472360
  0.40880000   0.59150454
  0.40880000   0.55032767
  0.40960000   0.54969640
  0.40960000   0.98568199
  0.40960000   0.84597902
  0.40960000   0.18423920
  0.40960000   0.59210672
  0.40960000   0.54969636
  0.40960000   0.98568200
  0.40960000   0.84597903
  0.40960000   0.18423918
  0.40960000   0.59210668
  0.40960000   0.54969633
  0.40960000   0.98568201
  0.40960000   0.84597905
  0.40960000   0.18423916
  0.40960000   0.59210663
  0.40960000   0.54969630
  0.40960000   0.98568201
  0.40960000   0.84597906
  0.40960000   0.18423914
  0.40960000   0.59210659
  0.40960000   0.54969627
  0.40960000   0.98568202
  0.40960000   0.84597907
  0.40960000   0.18423912
  0.40960000   0.59210655
  0.40960000   0.54969624
  0.40960000   0.98568203
  0.40960000   0.84597909
  0.40960000   0.18423910
  0.40960000   0.59210651
  0.40960000   0.54969621
  0.40960000   0.98568204
  0.40960000   0.84597910
  0.40960000   0.18423908
  0.40960000   0.59210647
  0.40960000   0.54969618
  0.40960000   0.98568205
  0.40960000   0.84597911
  0.40960000   0.18423906
  0.40960000   0.59210643
  0.41040000   0.18376321
  0.41040000   0.59270678
  0.41040000   0.54907994
  0.41040000   0.98587444
  0.41040000   0.84570758
  0.41040000   0.18376318
  0.41040000   0.59270673
  0.41040000   0.54907990
  0.41040000   0.98587445
  0.41040000   0.84570760
  0.41040000   0.18376316
  0.41040000   0.59270669
  0.41040000   0.54907986
  0.41040000   0.98587446
  0.41040000   0.84570761
  0.41040000   0.18376313
  0.41040000   0.59270665
  0.41040000   0.54907982
  0.41040000   0.98587447
  0.41040000   0.84570762
  0.41040000   0.18376311
  0.41040000   0.59270661
  0.41040000   0.54907978
  0.41040000   0.98587448
  0.41040000   0.84570764
  0.41040000   0.18376308
  0.41040000   0.59270656
  0.41040000   0.54907974
  0.41040000   0.98587449
  0.41040000   0.84570765
  0.41040000   0.18376305
  0.41040000   0.59270652
  0.41040000   0.54907970
  0.41040000   0.98587450
  0.41040000   0.84570766
  0.41040000   0.18376303
  0.41040000   0.59270648
  0.41040000   0.54907966
  0.41040000   0.98587451
  0.41040000   0.84570767
  0.41120000   0.18329419
  0.41120000   0.59330459
  0.41120000   0.54847625
  0.41120000   0.98606512
  0.41120000   0.84543772
  0.41120000   0.18329417
  0.41120000   0.59330454
  0.41120000   0.54847621
  0.41120000   0.98606513
  0.41120000   0.84543773
  0.41120000   0.18329415
  0.41120000   0.59330450
  0.41120000   0.54847618
  0.41120000   0.98606514
  0.41120000   0.84543775
  0.41120000   0.18329413
  0.41120000   0.59330446
  0.41120000   0.54847615
  0.41120000   0.98606515
  0.41120000   0.84543776
  0.41120000   0.18329411
  0.41120000   0.59330442
  0.41120000   0.54847612
  0.41120000   0.98606516
  0.41120000   0.84543777
  0.41120000   0.18329409
  0.41120000   0.59330438
  0.41120000   0.54847609
  0.41120000   0.98606516
  0.41120000   0.84543778
  0.41120000   0.18329407
  0.41120000   0.59330434
  0.41120000   0.54847606
  0.41120000   0.98606517
  0.41120000   0.84543780
  0.41120000   0.18329405
  0.41120000   0.59330430
  0.41120000   0.54847603
  0.41120000   0.98606518
  0.41120000   0.84543781
  0.41200000   0.18283401
  0.41200000   0.59390022
  0.41200000   0.54788787
  0.41200000   0.98625332
  0.41200000   0.84516940
  0.41200000   0.18283398
  0.41200000   0.59390018
  0.41200000   0.54788783
  0.41200000   0.98625333
  0.41200000   0.84516941
  0.41200000   0.18283395
  0.41200000   0.59390014
  0.41200000   0.54788779
  0.41200000   0.98625334
  0.41200000   0.84516943
  0.41200000   0.18283393
  0.41200000   0.59390010
  0.41200000   0.54788776
  0.41200000   0.98625335
  0.41200000   0.84516944
  0.41200000   0.18283390
  0.41200000   0.59390005
  0.41200000   0.54788772
  0.41200000   0.98625336
  0.41200000   0.84516945
  0.41200000   0.18283388
  0.41200000   0.59390001
  0.41200000   0.54788768
  0.41200000   0.98625336
  0.41200000   0.84516946
  0.41200000   0.18283385
  0.41200000   0.59389997
  0.41200000   0.54788764
  0.41200000   0.98625337
  0.41200000   0.84516948
  0.41200000   0.18283383
  0.41200000   0.59389993
  0.41200000   0.54788760
  0.41200000   0.98625338
  0.41200000   0.84516949
  0.41280000   0.59449327
  0.41280000   0.54731080
  0.41280000   0.98644002
  0.41280000   0.84490277
  0.41280000   0.18237988
  0.41280000   0.59449322
  0.41280000   0.54731078
  0.41280000   0.98644003
  0.41280000   0.84490278
  0.41280000   0.18237987
  0.41280000   0.59449318
  0.41280000   0.54731076
  0.41280000   0.98644004
  0.41280000   0.84490279
  0.41280000   0.18237986
  0.41280000   0.59449314
  0.41280000   0.54731074
  0.41280000   0.98644004
  0.41280000   0.84490280
  0.41280000   0.18237984
  0.41280000   0.59449310
  0.41280000   0.54731071
  0.41280000   0.98644005
  0.41280000   0.84490281
  0.41280000   0.18237983
  0.41280000   0.59449306
  0.41280000   0.54731069
  0.41280000   0.98644005
  0.41280000   0.84490282
  0.41280000   0.18237981
  0.41280000   0.59449303
  0.41280000   0.54731067
  0.41280000   0.98644006
  0.41280000   0.84490284
  0.41280000   0.18237980
  0.41280000   0.59449299
  0.41280000   0.54731065
  0.41280000   0.98644006
  0.41280000   0.84490285
  0.41280000   0.18237979
  0.41360000   0.54674914
  0.41360000   0.98662410
  0.41360000   0.84463774
  0.41360000   0.18193478
  0.41360000   0.59508383
  0.41360000   0.54674911
  0.41360000   0.98662411
  0.41360000   0.84463775
  0.41360000   0.18193476
  0.41360000   0.59508379
  0.41360000   0.54674907
  0.41360000   0.98662412
  0.41360000   0.84463776
  0.41360000   0.18193474
  0.41360000   0.59508375
  0.41360000   0.54674904
  0.41360000   0.98662413
  0.41360000   0.84463777
  0.41360000   0.18193471
  0.41360000   0.59508371
  0.41360000   0.54674901
  0.41360000   0.98662413
  0.41360000   0.84463778
  0.41360000   0.18193470
  0.41360000   0.59508367
  0.41360000   0.54674898
  0.41360000   0.98662414
  0.41360000   0.84463780
  0.41360000   0.18193468
  0.41360000   0.59508363
  0.41360000   0.54674895
  0.41360000   0.98662415
  0.41360000   0.84463781
  0.41360000   0.18193466
  0.41360000   0.59508359
  0.41360000   0.54674892
  0.41360000   0.98662416
  0.41360000   0.84463782
  0.41360000   0.18193464
  0.41360000   0.59508355
  0.41440000   0.98680623
  0.41440000   0.84437441
  0.41440000   0.18149679
  0.41440000   0.59567170
  0.41440000   0.54620007
  0.41440000   0.98680624
  0.41440000   0.84437442
  0.41440000   0.18149677
  0.41440000   0.59567166
  0.41440000   0.54620003
  0.41440000   0.98680625
  0.41440000   0.84437443
  0.41440000   0.18149674
  0.41440000   0.59567162
  0.41440000   0.54619999
  0.41440000   0.98680626
  0.41440000   0.84437444
  0.41440000   0.18149671
  0.41440000   0.59567158
  0.41440000   0.54619995
  0.41440000   0.98680627
  0.41440000   0.84437445
  0.41440000   0.18149669
  0.41440000   0.59567154
  0.41440000   0.54619991
  0.41440000   0.98680628
  0.41440000   0.84437447
  0.41440000   0.18149666
  0.41440000   0.59567150
  0.41440000   0.54619987
  0.41440000   0.98680629
  0.41440000   0.84437448
  0.41440000   0.18149664
  0.41440000   0.59567146
  0.41440000   0.54619983
  0.41440000   0.98680630
  0.41440000   0.84437449
  0.41440000   0.18149661
  0.41440000   0.59567142
  0.41440000   0.54619979
  0.41520000   0.98698672
  0.41520000   0.84411282
  0.41520000   0.18106507
  0.41520000   0.59625668
  0.41520000   0.54566236
  0.41520000   0.98698673
  0.41520000   0.84411283
  0.41520000   0.18106505
  0.41520000   0.59625664
  0.41520000   0.54566232
  0.41520000   0.98698674
  0.41520000   0.84411285
  0.41520000   0.18106502
  0.41520000   0.59625660
  0.41520000   0.54566228
  0.41520000   0.98698675
  0.41520000   0.84411286
  0.41520000   0.18106500
  0.41520000   0.59625656
  0.41520000   0.54566224
  0.41520000   0.98698676
  0.41520000   0.84411287
  0.41520000   0.18106497
  0.41520000   0.59625652
  0.41520000   0.54566221
  0.41520000   0.98698677
  0.41520000   0.84411288
  0.41520000   0.18106495
  0.41520000   0.59625648
  0.41520000   0.54566217
  0.41520000   0.98698678
  0.41520000   0.84411289
  0.41520000   0.18106492
  0.41520000   0.59625644
  0.41520000   0.54566213
  0.41520000   0.98698679
  0.41520000   0.84411290
  0.41520000   0.18106490
  0.41520000   0.59625641
  0.41520000   0.54566210
  0.41600000   0.59683877
  0.41600000   0.54513674
  0.41600000   0.98716533
  0.41600000   0.84385298
  0.41600000   0.18064017
  0.41600000   0.59683873
  0.41600000   0.54513670
  0.41600000   0.98716534
  0.41600000   0.84385299
  0.41600000   0.18064015
  0.41600000   0.59683869
  0.41600000   0.54513666
  0.41600000   0.98716535
  0.41600000   0.84385300
  0.41600000   0.18064012
  0.41600000   0.59683865
  0.41600000   0.54513662
  0.41600000   0.98716536
  0.41600000   0.84385301
  0.41600000   0.18064010
  0.41600000   0.59683861
  0.41600000   0.54513659
  0.41600000   0.98716537
  0.41600000   0.84385303
  0.41600000   0.18064007
  0.41600000   0.59683857
  0.41600000   0.54513655
  0.41600000   0.98716538
  0.41600000   0.84385304
  0.41600000   0.18064005
  0.41600000   0.59683853
  0.41600000   0.54513651
  0.41600000   0.98716539
  0.41600000   0.84385305
  0.41600000   0.18064002
  0.41600000   0.59683849
  0.41600000   0.54513647
  0.41600000   0.98716539
  0.41600000   0.84385306
  0.41600000   0.18064000
  0.41680000   0.18022205
  0.41680000   0.59741783
  0.41680000   0.54462296
  0.41680000   0.98734204
  0.41680000   0.84359488
  0.41680000   0.18022202
  0.41680000   0.59741779
  0.41680000   0.54462292
  0.41680000   0.98734205
  0.41680000   0.84359489
  0.41680000   0.18022199
  0.41680000   0.59741775
  0.41680000   0.54462288
  0.41680000   0.98734206
  0.41680000   0.84359490
  0.41680000   0.18022197
  0.41680000   0.59741771
  0.41680000   0.54462284
  0.41680000   0.98734207
  0.41680000   0.84359491
  0.41680000   0.18022194
  0.41680000   0.59741767
  0.41680000   0.54462280
  0.41680000   0.98734208
  0.41680000   0.84359493
  0.41680000   0.18022192
  0.41680000   0.59741763
  0.41680000   0.54462276
  0.41680000   0.98734209
  0.41680000   0.84359494
  0.41680000   0.18022189
  0.41680000   0.59741759
  0.41680000   0.54462272
  0.41680000   0.98734210
  0.41680000   0.84359495
  0.41680000   0.18022186
  0.41680000   0.59741756
  0.41680000   0.54462268
  0.41680000   0.98734211
  0.41680000   0.84359496
  0.41760000   0.17981003
  0.41760000   0.59799381
  0.41760000   0.54412012
  0.41760000   0.98751708
  0.41760000   0.84333855
  0.41760000   0.17981001
  0.41760000   0.59799377
  0.41760000   0.54412008
  0.41760000   0.98751709
  0.41760000   0.84333856
  0.41760000   0.17980998
  0.41760000   0.59799373
  0.41760000   0.54412004
  0.41760000   0.98751710
  0.41760000   0.84333857
  0.41760000   0.17980995
  0.41760000   0.59799369
  0.41760000   0.54412000
  0.41760000   0.98751711
  0.41760000   0.84333858
  0.41760000   0.17980993
  0.41760000   0.59799366
  0.41760000   0.54411996
  0.41760000   0.98751712
  0.41760000   0.84333859
  0.41760000   0.17980990
  0.41760000   0.59799362
  0.41760000   0.54411992
  0.41760000   0.98751713
  0.41760000   0.84333860
  0.41760000   0.17980987
  0.41760000   0.59799358
  0.41760000   0.54411988
  0.41760000   0.98751714
  0.41760000   0.84333861
  0.41760000   0.17980985
  0.41760000   0.59799354
  0.41760000   0.54411984
  0.41760000   0.98751715
  0.41760000   0.84333862
  0.41840000   0.84308398
  0.41840000   0.17940380
  0.41840000   0.59856664
  0.41840000   0.54362763
  0.41840000   0.98769056
  0.41840000   0.84308399
  0.41840000   0.17940377
  0.41840000   0.59856660
  0.41840000   0.54362760
  0.41840000   0.98769057
  0.41840000   0.84308400
  0.41840000   0.17940375
  0.41840000   0.59856656
  0.41840000   0.54362756
  0.41840000   0.98769058
  0.41840000   0.84308401
  0.41840000   0.17940373
  0.41840000   0.59856653
  0.41840000   0.54362753
  0.41840000   0.98769059
  0.41840000   0.84308402
  0.41840000   0.17940370
  0.41840000   0.59856649
  0.41840000   0.54362749
  0.41840000   0.98769060
  0.41840000   0.84308403
  0.41840000   0.17940368
  0.41840000   0.59856645
  0.41840000   0.54362746
  0.41840000   0.98769060
  0.41840000   0.84308405
  0.41840000   0.17940366
  0.41840000   0.59856641
  0.41840000   0.54362742
  0.41840000   0.98769061
  0.41840000   0.84308406
  0.41840000   0.17940364
  0.41840000   0.59856638
  0.41840000   0.54362739
  0.41840000   0.98769062
  0.41920000   0.59913635
  0.41920000   0.54314653
  0.41920000   0.98786215
  0.41920000   0.84283118
  0.41920000   0.17900408
  0.41920000   0.59913631
  0.41920000   0.54314649
  0.41920000   0.98786216
  0.41920000   0.84283120
  0.41920000   0.17900405
  0.41920000   0.59913627
  0.41920000   0.54314645
  0.41920000   0.98786217
  0.41920000   0.84283121
  0.41920000   0.17900403
  0.41920000   0.59913624
  0.41920000   0.54314641
  0.41920000   0.98786218
  0.41920000   0.84283122
  0.41920000   0.17900400
  0.41920000   0.59913620
  0.41920000   0.54314637
  0.41920000   0.98786219
  0.41920000   0.84283123
  0.41920000   0.17900398
  0.41920000   0.59913616
  0.41920000   0.54314633
  0.41920000   0.98786220
  0.41920000   0.84283124
  0.41920000   0.17900395
  0.41920000   0.59913612
  0.41920000   0.54314629
  0.41920000   0.98786221
  0.41920000   0.84283125
  0.41920000   0.17900393
  0.41920000   0.59913609
  0.41920000   0.54314626
  0.41920000   0.98786222
  0.41920000   0.84283126
  0.41920000   0.17900390
  0.42000000   0.54267556
  0.42000000   0.98803216
  0.42000000   0.84258015
  0.42000000   0.17861010
  0.42000000   0.59970280
  0.42000000   0.54267552
  0.42000000   0.98803217
  0.42000000   0.84258016
  0.42000000   0.17861007
  0.42000000   0.59970276
  0.42000000   0.54267548
  0.42000000   0.98803218
  0.42000000   0.84258017
  0.42000000   0.17861004
  0.42000000   0.59970272
  0.42000000   0.54267544
  0.42000000   0.98803219
  0.42000000   0.84258018
  0.42000000   0.17861002
  0.42000000   0.59970269
  0.42000000   0.54267540
  0.42000000   0.98803220
  0.42000000   0.84258019
  0.42000000   0.17860999
  0.42000000   0.59970265
  0.42000000   0.54267536
  0.42000000   0.98803221
  0.42000000   0.84258020
  0.42000000   0.17860997
  0.42000000   0.59970261
  0.42000000   0.54267532
  0.42000000   0.98803222
  0.42000000   0.84258021
  0.42000000   0.17860994
  0.42000000   0.59970258
  0.42000000   0.54267528
  0.42000000   0.98803223
  0.42000000   0.84258022
  0.42000000   0.17860992
  0.42000000   0.59970254
  0.42080000   0.17822086
  0.42080000   0.60026605
  0.42080000   0.54221327
  0.42080000   0.98820096
  0.42080000   0.84233091
  0.42080000   0.17822081
  0.42080000   0.60026596
  0.42080000   0.54221317
  0.42080000   0.98820097
  0.42080000   0.84233090
  0.42080000   0.17822078
  0.42080000   0.60026596
  0.42080000   0.54221313
  0.42080000   0.98820097
  0.42080000   0.84233091
  0.42080000   0.17822080
  0.42080000   0.60026594
  0.42080000   0.54221317
  0.42080000   0.98820098
  0.42080000   0.84233094
  0.42080000   0.17822076
  0.42080000   0.60026585
  0.42080000   0.54221310
  0.42080000   0.98820099
  0.42080000   0.84233094
  0.42080000   0.17822073
  0.42080000   0.60026585
  0.42080000   0.54221305
  0.42080000   0.98820099
  0.42080000   0.84233094
  0.42080000   0.17822074
  0.42080000   0.60026583
  0.42080000   0.54221307
  0.42080000   0.98820100
  0.42080000   0.84233097
  0.42080000   0.17822071
  0.42080000   0.60026575
  0.42080000   0.54221302
  0.42080000   0.98820101
  0.42080000   0.84233097
  0.42160000   0.54176270
  0.42160000   0.98836765
  0.42160000   0.84208339
  0.42160000   0.17783846
  0.42160000   0.60082596
  0.42160000   0.54176258
  0.42160000   0.98836767
  0.42160000   0.84208337
  0.42160000   0.17783841
  0.42160000   0.60082598
  0.42160000   0.54176249
  0.42160000   0.98836766
  0.42160000   0.84208338
  0.42160000   0.17783844
  0.42160000   0.60082597
  0.42160000   0.54176256
  0.42160000   0.98836768
  0.42160000   0.84208342
  0.42160000   0.17783839
  0.42160000   0.60082586
  0.42160000   0.54176248
  0.42160000   0.98836770
  0.42160000   0.84208341
  0.42160000   0.17783834
  0.42160000   0.60082586
  0.42160000   0.54176238
  0.42160000   0.98836769
  0.42160000   0.84208341
  0.42160000   0.17783836
  0.42160000   0.60082586
  0.42160000   0.54176243
  0.42160000   0.98836770
  0.42160000   0.84208344
  0.42160000   0.17783832
  0.42160000   0.60082576
  0.42160000   0.54176237
  0.42160000   0.98836772
  0.42160000   0.84208344
  0.42160000   0.17783827
  0.42160000   0.60082575
  0.42240000   0.60138624
  0.42240000   0.54132611
  0.42240000   0.98853286
  0.42240000   0.84183929
  0.42240000   0.17746100
  0.42240000   0.60137878
  0.42240000   0.54132095
  0.42240000   0.98853380
  0.42240000   0.84183713
  0.42240000   0.17745811
  0.42240000   0.60138274
  0.42240000   0.54131531
  0.42240000   0.98853271
  0.42240000   0.84183652
  0.42240000   0.17746284
  0.42240000   0.60138607
  0.42240000   0.54132432
  0.42240000   0.98853278
  0.42240000   0.84183896
  0.42240000   0.17746153
  0.42240000   0.60137978
  0.42240000   0.54132196
  0.42240000   0.98853372
  0.42240000   0.84183757
  0.42240000   0.17745831
  0.42240000   0.60138179
  0.42240000   0.54131575
  0.42240000   0.98853292
  0.42240000   0.84183655
  0.42240000   0.17746200
  0.42240000   0.60138566
  0.42240000   0.54132274
  0.42240000   0.98853276
  0.42240000   0.84183863
  0.42240000   0.17746181
  0.42240000   0.60138066
  0.42240000   0.54132252
  0.42240000   0.98853362
  0.42240000   0.84183788
  0.42240000   0.17745863
  0.42320000   0.58990418
  0.42320000   0.51207096
  0.42320000   0.98769069
  0.42320000   0.83169153
  0.42320000   0.18538223
  0.42320000   0.62819801
  0.42320000   0.55560132
  0.42320000   0.98225434
  0.42320000   0.85012473
  0.42320000   0.19928894
  0.42320000   0.59011673
  0.42320000   0.58314786
  0.42320000   0.99213866
  0.42320000   0.84412990
  0.42320000   0.16209465
  0.42320000   0.58990403
  0.42320000   0.51207051
  0.42320000   0.98769068
  0.42320000   0.83169143
  0.42320000   0.18538240
  0.42320000   0.62819830
  0.42320000   0.55560164
  0.42320000   0.98225427
  0.42320000   0.85012493
  0.42320000   0.19928919
  0.42320000   0.59011632
  0.42320000   0.58314836
  0.42320000   0.99213873
  0.42320000   0.84412992
  0.42320000   0.16209441
  0.42320000   0.58990388
  0.42320000   0.51207008
  0.42320000   0.98769067
  0.42320000   0.83169133
  0.42320000   0.18538256
  0.42320000   0.62819858
  0.42320000   0.55560196
  0.42320000   0.98225421
  0.42320000   0.85012513
  0.42320000   0.19928944
  0.42400000   0.58920894
  0.42400000   0.58809306
  0.42400000   0.99256156
  0.42400000   0.84356637
  0.42400000   0.16082478
  0.42400000   0.59085996
  0.42400000   0.50989016
  0.42400000   0.98765389
  0.42400000   0.83070572
  0.42400000   0.18614592
  0.42400000   0.63086292
  0.42400000   0.55717188
  0.42400000   0.98158287
  0.42400000   0.85094465
  0.42400000   0.20177813
  0.42400000   0.58920859
  0.42400000   0.58809340
  0.42400000   0.99256163
  0.42400000   0.84356639
  0.42400000   0.16082458
  0.42400000   0.59085982
  0.42400000   0.50988982
  0.42400000   0.98765388
  0.42400000   0.83070565
  0.42400000   0.18614603
  0.42400000   0.63086312
  0.42400000   0.55717212
  0.42400000   0.98158282
  0.42400000   0.85094482
  0.42400000   0.20177829
  0.42400000   0.58920824
  0.42400000   0.58809374
  0.42400000   0.99256168
  0.42400000   0.84356641
  0.42400000   0.16082440
  0.42400000   0.59085969
  0.42400000   0.50988948
  0.42400000   0.98765388
  0.42400000   0.83070559
  0.42400000   0.18614614
  0.42480000   0.59200849
  0.42480000   0.50821865
  0.42480000   0.98764183
  0.42480000   0.82992027
  0.42480000   0.18672567
  0.42480000   0.63299516
  0.42480000   0.55841813
  0.42480000   0.98106137
  0.42480000   0.85157860
  0.42480000   0.20374743
  0.42480000   0.58855187
  0.42480000   0.59205600
  0.42480000   0.99292301
  0.42480000   0.84296426
  0.42480000   0.15981859
  0.42480000   0.59200835
  0.42480000   0.50821839
  0.42480000   0.98764183
  0.42480000   0.82992023
  0.42480000   0.18672575
  0.42480000   0.63299528
  0.42480000   0.55841830
  0.42480000   0.98106134
  0.42480000   0.85157873
  0.42480000   0.20374752
  0.42480000   0.58855158
  0.42480000   0.59205619
  0.42480000   0.99292306
  0.42480000   0.84296429
  0.42480000   0.15981844
  0.42480000   0.59200822
  0.42480000   0.50821813
  0.42480000   0.98764183
  0.42480000   0.82992019
  0.42480000   0.18672583
  0.42480000   0.63299540
  0.42480000   0.55841846
  0.42480000   0.98106132
  0.42480000   0.85157886
  0.42480000   0.20374761
  0.42560000   0.15895502
  0.42560000   0.59327187
  0.42560000   0.50681955
  0.42560000   0.98763406
  0.42560000   0.82924943
  0.42560000   0.18724011
  0.42560000   0.63483852
  0.42560000   0.55955299
  0.42560000   0.98062223
  0.42560000   0.85211986
  0.42560000   0.20542667
  0.42560000   0.58800856
  0.42560000   0.59547010
  0.42560000   0.99325169
  0.42560000   0.84233549
  0.42560000   0.15895487
  0.42560000   0.59327173
  0.42560000   0.50681928
  0.42560000   0.98763406
  0.42560000   0.82924939
  0.42560000   0.18724019
  0.42560000   0.63483864
  0.42560000   0.55955315
  0.42560000   0.98062221
  0.42560000   0.85211999
  0.42560000   0.20542676
  0.42560000   0.58800827
  0.42560000   0.59547030
  0.42560000   0.99325174
  0.42560000   0.84233552
  0.42560000   0.15895472
  0.42560000   0.59327160
  0.42560000   0.50681902
  0.42560000   0.98763407
  0.42560000   0.82924935
  0.42560000   0.18724025
  0.42560000   0.63483876
  0.42560000   0.55955330
  0.42560000   0.98062218
  0.42560000   0.85212012
  0.42640000   0.20691398
  0.42640000   0.58752272
  0.42640000   0.59852171
  0.42640000   0.99355998
  0.42640000   0.84168624
  0.42640000   0.15818165
  0.42640000   0.59461468
  0.42640000   0.50559217
  0.42640000   0.98762181
  0.42640000   0.82865719
  0.42640000   0.18774042
  0.42640000   0.63649659
  0.42640000   0.56066887
  0.42640000   0.98023683
  0.42640000   0.85260728
  0.42640000   0.20691405
  0.42640000   0.58752244
  0.42640000   0.59852187
  0.42640000   0.99356002
  0.42640000   0.84168627
  0.42640000   0.15818151
  0.42640000   0.59461455
  0.42640000   0.50559193
  0.42640000   0.98762182
  0.42640000   0.82865716
  0.42640000   0.18774047
  0.42640000   0.63649669
  0.42640000   0.56066900
  0.42640000   0.98023682
  0.42640000   0.85260740
  0.42640000   0.20691412
  0.42640000   0.58752217
  0.42640000   0.59852203
  0.42640000   0.99356006
  0.42640000   0.84168630
  0.42640000   0.15818138
  0.42640000   0.59461442
  0.42640000   0.50559170
  0.42640000   0.98762182
  0.42640000   0.82865712
  0.42720000   0.85296501
  0.42720000   0.20777032
  0.42720000   0.58711296
  0.42720000   0.60040357
  0.42720000   0.99386394
  0.42720000   0.84115689
  0.42720000   0.15736516
  0.42720000   0.59564831
  0.42720000   0.50427845
  0.42720000   0.98762295
  0.42720000   0.82799706
  0.42720000   0.18821362
  0.42720000   0.63829158
  0.42720000   0.56171604
  0.42720000   0.97976067
  0.42720000   0.85314947
  0.42720000   0.20873109
  0.42720000   0.58702619
  0.42720000   0.60217517
  0.42720000   0.99384323
  0.42720000   0.84088563
  0.42720000   0.15758287
  0.42720000   0.59638296
  0.42720000   0.50469868
  0.42720000   0.98757750
  0.42720000   0.82825671
  0.42720000   0.18829310
  0.42720000   0.63774569
  0.42720000   0.56191239
  0.42720000   0.98002294
  0.42720000   0.85296711
  0.42720000   0.20778038
  0.42720000   0.58711161
  0.42720000   0.60042217
  0.42720000   0.99386381
  0.42720000   0.84115425
  0.42720000   0.15736708
  0.42720000   0.59565537
  0.42720000   0.50428220
  0.42720000   0.98762251
  0.42800000   0.56526211
  0.42800000   0.98204615
  0.42800000   0.85176506
  0.42800000   0.20050758
  0.42800000   0.58740272
  0.42800000   0.58723241
  0.42800000   0.99418867
  0.42800000   0.84228620
  0.42800000   0.15562713
  0.42800000   0.59233784
  0.42800000   0.50117425
  0.42800000   0.98790606
  0.42800000   0.82610281
  0.42800000   0.18803110
  0.42800000   0.64254391
  0.42800000   0.56128944
  0.42800000   0.97798101
  0.42800000   0.85452208
  0.42800000   0.21527552
  0.42800000   0.58627321
  0.42800000   0.61447413
  0.42800000   0.99386773
  0.42800000   0.83819697
  0.42800000   0.15894425
  0.42800000   0.60339653
  0.42800000   0.50754756
  0.42800000   0.98707471
  0.42800000   0.83016072
  0.42800000   0.18975697
  0.42800000   0.63420542
  0.42800000   0.56526233
  0.42800000   0.98204626
  0.42800000   0.85176518
  0.42800000   0.20050725
  0.42800000   0.58740227
  0.42800000   0.58723184
  0.42800000   0.99418875
  0.42800000   0.84228635
  0.42800000   0.15562684
  0.42800000   0.59233736
  0.42880000   0.97728477
  0.42880000   0.85510040
  0.42880000   0.21791245
  0.42880000   0.58598837
  0.42880000   0.61957437
  0.42880000   0.99397710
  0.42880000   0.83665539
  0.42880000   0.15939769
  0.42880000   0.60729361
  0.42880000   0.50863086
  0.42880000   0.98669809
  0.42880000   0.83103278
  0.42880000   0.19112214
  0.42880000   0.63292135
  0.42880000   0.56823521
  0.42880000   0.98300517
  0.42880000   0.85129229
  0.42880000   0.19709932
  0.42880000   0.58737287
  0.42880000   0.58116469
  0.42880000   0.99442307
  0.42880000   0.84229893
  0.42880000   0.15480708
  0.42880000   0.59206767
  0.42880000   0.49985111
  0.42880000   0.98804895
  0.42880000   0.82526724
  0.42880000   0.18799184
  0.42880000   0.64449890
  0.42880000   0.56132531
  0.42880000   0.97728473
  0.42880000   0.85510063
  0.42880000   0.21791260
  0.42880000   0.58598786
  0.42880000   0.61957469
  0.42880000   0.99397717
  0.42880000   0.83665541
  0.42880000   0.15939750
  0.42880000   0.60729348
  0.42880000   0.50863054
  0.42960000   0.15781563
  0.42960000   0.60524879
  0.42960000   0.50587798
  0.42960000   0.98708894
  0.42960000   0.82933406
  0.42960000   0.19044589
  0.42960000   0.63660413
  0.42960000   0.56696384
  0.42960000   0.98164478
  0.42960000   0.85229229
  0.42960000   0.20222683
  0.42960000   0.58705542
  0.42960000   0.59103037
  0.42960000   0.99482004
  0.42960000   0.84148914
  0.42960000   0.15377146
  0.42960000   0.59368468
  0.42960000   0.49810898
  0.42960000   0.98794185
  0.42960000   0.82441901
  0.42960000   0.18898675
  0.42960000   0.64689490
  0.42960000   0.56327883
  0.42960000   0.97641199
  0.42960000   0.85606588
  0.42960000   0.22106160
  0.42960000   0.58492425
  0.42960000   0.62558545
  0.42960000   0.99404100
  0.42960000   0.83463230
  0.42960000   0.16025640
  0.42960000   0.61244521
  0.42960000   0.51043802
  0.42960000   0.98596984
  0.42960000   0.83254035
  0.42960000   0.19363536
  0.42960000   0.63064618
  0.42960000   0.57343635
  0.42960000   0.98440905
  0.42960000   0.85051024
  0.43040000   0.56338833
  0.43040000   0.97830066
  0.43040000   0.85460769
  0.43040000   0.21452214
  0.43040000   0.58622211
  0.43040000   0.61399255
  0.43040000   0.99477370
  0.43040000   0.83756823
  0.43040000   0.15604688
  0.43040000   0.60399398
  0.43040000   0.50273207
  0.43040000   0.98724035
  0.43040000   0.82758266
  0.43040000   0.19076149
  0.43040000   0.64077247
  0.43040000   0.56750428
  0.43040000   0.98000907
  0.43040000   0.85367496
  0.43040000   0.20824784
  0.43040000   0.58611947
  0.43040000   0.60248115
  0.43040000   0.99508437
  0.43040000   0.83979908
  0.43040000   0.15369479
  0.43040000   0.59777316
  0.43040000   0.49821935
  0.43040000   0.98771687
  0.43040000   0.82470584
  0.43040000   0.19000220
  0.43040000   0.64681330
  0.43040000   0.56550689
  0.43040000   0.97684942
  0.43040000   0.85599886
  0.43040000   0.21957250
  0.43040000   0.58467968
  0.43040000   0.62318953
  0.43040000   0.99447407
  0.43040000   0.83509419
  0.43040000   0.15844350
  0.43040000   0.61074028
  0.43120000   0.15235137
  0.43120000   0.59621737
  0.43120000   0.49588064
  0.43120000   0.98790790
  0.43120000   0.82322003
  0.43120000   0.19003037
  0.43120000   0.65020042
  0.43120000   0.56550624
  0.43120000   0.97528462
  0.43120000   0.85725933
  0.43120000   0.22525512
  0.43120000   0.58382747
  0.43120000   0.63374192
  0.43120000   0.99418955
  0.43120000   0.83137425
  0.43120000   0.16150505
  0.43120000   0.62063718
  0.43120000   0.51310754
  0.43120000   0.98447304
  0.43120000   0.83507597
  0.43120000   0.19897915
  0.43120000   0.62725237
  0.43120000   0.58428293
  0.43120000   0.98654404
  0.43120000   0.84885949
  0.43120000   0.18465493
  0.43120000   0.58881540
  0.43120000   0.55858098
  0.43120000   0.99449435
  0.43120000   0.84066214
  0.43120000   0.15571573
  0.43120000   0.59662541
  0.43120000   0.50244915
  0.43120000   0.98867332
  0.43120000   0.82616910
  0.43120000   0.18568677
  0.43120000   0.64197609
  0.43120000   0.55804382
  0.43120000   0.97928633
  0.43120000   0.85309974
  0.43200000   0.18760065
  0.43200000   0.64656976
  0.43200000   0.56154947
  0.43200000   0.97739453
  0.43200000   0.85514249
  0.43200000   0.21816804
  0.43200000   0.58659084
  0.43200000   0.62122549
  0.43200000   0.99503870
  0.43200000   0.83524953
  0.43200000   0.15640294
  0.43200000   0.60974493
  0.43200000   0.50385455
  0.43200000   0.98671544
  0.43200000   0.82864647
  0.43200000   0.19285200
  0.43200000   0.63951202
  0.43200000   0.57214363
  0.43200000   0.98136257
  0.43200000   0.85295887
  0.43200000   0.20360003
  0.43200000   0.58637247
  0.43200000   0.59448004
  0.43200000   0.99575010
  0.43200000   0.84036604
  0.43200000   0.15100779
  0.43200000   0.59551385
  0.43200000   0.49353121
  0.43200000   0.98796831
  0.43200000   0.82181188
  0.43200000   0.19056169
  0.43200000   0.65360244
  0.43200000   0.56643889
  0.43200000   0.97365647
  0.43200000   0.85866467
  0.43200000   0.23108500
  0.43200000   0.58263717
  0.43200000   0.64446441
  0.43200000   0.99371419
  0.43200000   0.82683646
  0.43280000   0.17985686
  0.43280000   0.62110413
  0.43280000   0.54900916
  0.43280000   0.98794711
  0.43280000   0.84437013
  0.43280000   0.18120519
  0.43280000   0.59849804
  0.43280000   0.55242413
  0.43280000   0.99358191
  0.43280000   0.84032881
  0.43280000   0.15996338
  0.43280000   0.59937454
  0.43280000   0.51129922
  0.43280000   0.98988280
  0.43280000   0.82959687
  0.43280000   0.17971345
  0.43280000   0.63217083
  0.43280000   0.54800691
  0.43280000   0.98375342
  0.43280000   0.84758514
  0.43280000   0.19661858
  0.43280000   0.59693281
  0.43280000   0.58162496
  0.43280000   0.99487474
  0.43280000   0.84189425
  0.43280000   0.15404624
  0.43280000   0.59323801
  0.43280000   0.49980961
  0.43280000   0.98934372
  0.43280000   0.82418979
  0.43280000   0.18417196
  0.43280000   0.64596757
  0.43280000   0.55536317
  0.43280000   0.97769007
  0.43280000   0.85397210
  0.43280000   0.21770566
  0.43280000   0.58948871
  0.43280000   0.62066314
  0.43280000   0.99513386
  0.43280000   0.83534120
  0.43360000   0.99263272
  0.43360000   0.81786739
  0.43360000   0.17439707
  0.43360000   0.65600333
  0.43360000   0.53616602
  0.43360000   0.97116374
  0.43360000   0.85477880
  0.43360000   0.24297085
  0.43360000   0.59734635
  0.43360000   0.66599719
  0.43360000   0.99082650
  0.43360000   0.81659802
  0.43360000   0.18242365
  0.43360000   0.66201091
  0.43360000   0.55090633
  0.43360000   0.96843550
  0.43360000   0.86073658
  0.43360000   0.25061064
  0.43360000   0.58506431
  0.43360000   0.67934499
  0.43360000   0.99026208
  0.43360000   0.80718579
  0.43360000   0.18853625
  0.43360000   0.68394024
  0.43360000   0.55947307
  0.43360000   0.95243095
  0.43360000   0.87438073
  0.43360000   0.30323812
  0.43360000   0.56749222
  0.43360000   0.76493568
  0.43360000   0.97088086
  0.43360000   0.72160250
  0.43360000   0.29153689
  0.43360000   0.85906976
  0.43360000   0.68215228
  0.43360000   0.65469891
  0.43360000   0.95288355
  0.43360000   0.85481731
  0.43360000   0.31270263
  0.43360000   0.62231075
  0.43440000   0.86536359
  0.43440000   0.92442092
  0.43440000   0.54495452
  0.43440000   0.46953897
  0.43440000   0.98425090
  0.43440000   0.81103776
  0.43440000   0.21149534
  0.43440000   0.68547620
  0.43440000   0.60245741
  0.43440000   0.95224086
  0.43440000   0.87418045
  0.43440000   0.30454207
  0.43440000   0.56881055
  0.43440000   0.76740004
  0.43440000   0.97058573
  0.43440000   0.71807678
  0.43440000   0.29378707
  0.43440000   0.86421706
  0.43440000   0.68327239
  0.43440000   0.64156703
  0.43440000   0.95348113
  0.43440000   0.86156208
  0.43440000   0.30735131
  0.43440000   0.60355403
  0.43440000   0.77208198
  0.43440000   0.96736615
  0.43440000   0.71333153
  0.43440000   0.30731287
  0.43440000   0.87424966
  0.43440000   0.69902136
  0.43440000   0.61237237
  0.43440000   0.94090252
  0.43440000   0.88145270
  0.43440000   0.34167410
  0.43440000   0.56084397
  0.43440000   0.82146919
  0.43440000   0.95026103
  0.43440000   0.63218182
  0.43440000   0.38126544
  0.43440000   0.95784432
  0.43520000   0.68541510
  0.43520000   0.84745645
  0.43520000   0.89698926
  0.43520000   0.60906798
  0.43520000   0.55835127
  0.43520000   0.99525673
  0.43520000   0.84277859
  0.43520000   0.15408912
  0.43520000   0.59209131
  0.43520000   0.50148366
  0.43520000   0.99107217
  0.43520000   0.82437965
  0.43520000   0.17815224
  0.43520000   0.64375220
  0.43520000   0.54526536
  0.43520000   0.97937641
  0.43520000   0.85093768
  0.43520000   0.21329571
  0.43520000   0.59592158
  0.43520000   0.61363487
  0.43520000   0.99577954
  0.43520000   0.83705072
  0.43520000   0.15344338
  0.43520000   0.60486148
  0.43520000   0.49948802
  0.43520000   0.98849625
  0.43520000   0.82500789
  0.43520000   0.18808228
  0.43520000   0.64625933
  0.43520000   0.56377213
  0.43520000   0.97894508
  0.43520000   0.85441014
  0.43520000   0.21325506
  0.43520000   0.58718908
  0.43520000   0.61353786
  0.43520000   0.99657386
  0.43520000   0.83625970
  0.43520000   0.15038970
  0.43520000   0.60535805
  0.43520000   0.49338256
  0.43600000   0.60507466
  0.43600000   0.49068342
  0.43600000   0.98743357
  0.43600000   0.82066679
  0.43600000   0.19426319
  0.43600000   0.65825478
  0.43600000   0.57435021
  0.43600000   0.97257474
  0.43600000   0.86022284
  0.43600000   0.23542712
  0.43600000   0.58113267
  0.43600000   0.65366143
  0.43600000   0.99436149
  0.43600000   0.82132714
  0.43600000   0.16640982
  0.43600000   0.64563369
  0.43600000   0.52262634
  0.43600000   0.97667925
  0.43600000   0.84568421
  0.43600000   0.22633679
  0.43600000   0.61388828
  0.43600000   0.63693820
  0.43600000   0.99108408
  0.43600000   0.83275205
  0.43600000   0.17497893
  0.43600000   0.62381627
  0.43600000   0.54088065
  0.43600000   0.98779452
  0.43600000   0.84270731
  0.43600000   0.18342678
  0.43600000   0.60394326
  0.43600000   0.55778335
  0.43600000   0.99415701
  0.43600000   0.84086746
  0.43600000   0.15818114
  0.43600000   0.59783511
  0.43600000   0.50905887
  0.43600000   0.99105076
  0.43600000   0.82759321
  0.43600000   0.17661330
  0.43680000   0.63827606
  0.43680000   0.99558788
  0.43680000   0.82823247
  0.43680000   0.15849577
  0.43680000   0.62724133
  0.43680000   0.50889801
  0.43680000   0.98371971
  0.43680000   0.83382314
  0.43680000   0.20392758
  0.43680000   0.63309986
  0.43680000   0.59515880
  0.43680000   0.98632958
  0.43680000   0.84832605
  0.43680000   0.18713908
  0.43680000   0.59207065
  0.43680000   0.56539365
  0.43680000   0.99659303
  0.43680000   0.83977619
  0.43680000   0.14879248
  0.43680000   0.59657343
  0.43680000   0.49089308
  0.43680000   0.98916982
  0.43680000   0.81927619
  0.43680000   0.18794967
  0.43680000   0.65879856
  0.43680000   0.56263186
  0.43680000   0.97210404
  0.43680000   0.85967440
  0.43680000   0.23762522
  0.43680000   0.58352888
  0.43680000   0.65784046
  0.43680000   0.99412711
  0.43680000   0.81903268
  0.43680000   0.16856524
  0.43680000   0.65158588
  0.43680000   0.52651607
  0.43680000   0.97409466
  0.43680000   0.84930039
  0.43680000   0.23493588
  0.43680000   0.60856670
  0.43760000   0.92189910
  0.43760000   0.72033893
  0.43760000   0.46670989
  0.43760000   0.90815682
  0.43760000   0.86452229
  0.43760000   0.45861267
  0.43760000   0.63666918
  0.43760000   0.94973620
  0.43760000   0.86637229
  0.43760000   0.31897901
  0.43760000   0.59565478
  0.43760000   0.79083675
  0.43760000   0.96319662
  0.43760000   0.68402536
  0.43760000   0.32941801
  0.43760000   0.91100734
  0.43760000   0.71051522
  0.43760000   0.50369738
  0.43760000   0.92485338
  0.43760000   0.87711301
  0.43760000   0.39869909
  0.43760000   0.58971960
  0.43760000   0.89443490
  0.43760000   0.91479874
  0.43760000   0.47132510
  0.43760000   0.49313420
  0.43760000   0.95404376
  0.43760000   0.85008744
  0.43760000   0.31100746
  0.43760000   0.63447288
  0.43760000   0.77721541
  0.43760000   0.95708326
  0.43760000   0.71280056
  0.43760000   0.34712810
  0.43760000   0.88836458
  0.43760000   0.74923653
  0.43760000   0.56281354
  0.43760000   0.88129604
  0.43760000   0.92305179
  0.43760000   0.50420986
  0.43840000   0.65915995
  0.43840000   0.96188173
  0.43840000   0.84585197
  0.43840000   0.28506661
  0.43840000   0.63633631
  0.43840000   0.73715468
  0.43840000   0.96833957
  0.43840000   0.76475615
  0.43840000   0.29197377
  0.43840000   0.80078550
  0.43840000   0.71064371
  0.43840000   0.78260306
  0.43840000   0.89946599
  0.43840000   0.74318309
  0.43840000   0.53337503
  0.43840000   0.88871495
  0.43840000   0.91300117
  0.43840000   0.48993048
  0.43840000   0.50237389
  0.43840000   0.96792253
  0.43840000   0.84509063
  0.43840000   0.26207964
  0.43840000   0.62982217
  0.43840000   0.69973858
  0.43840000   0.97918144
  0.43840000   0.79895064
  0.43840000   0.23811069
  0.43840000   0.72088993
  0.43840000   0.64503776
  0.43840000   0.91582484
  0.43840000   0.88556126
  0.43840000   0.42357843
  0.43840000   0.57221343
  0.43840000   0.92052835
  0.43840000   0.89895227
  0.43840000   0.40042352
  0.43840000   0.52742645
  0.43840000   0.89368566
  0.43840000   0.90632842
  0.43840000   0.47862861
  0.43920000   0.71552446
  0.43920000   0.78843774
  0.43920000   0.89343103
  0.43920000   0.73735362
  0.43920000   0.55358083
  0.43920000   0.89872696
  0.43920000   0.91263826
  0.43920000   0.46124585
  0.43920000   0.49921941
  0.43920000   0.94834587
  0.43920000   0.85824353
  0.43920000   0.32823951
  0.43920000   0.62021555
  0.43920000   0.80423363
  0.43920000   0.95328301
  0.43920000   0.66626988
  0.43920000   0.36920298
  0.43920000   0.93717806
  0.43920000   0.74699255
  0.43920000   0.40977666
  0.43920000   0.86252305
  0.43920000   0.83984813
  0.43920000   0.60090166
  0.43920000   0.71167215
  0.43920000   0.98698184
  0.43920000   0.78161237
  0.43920000   0.21392166
  0.43920000   0.74383525
  0.43920000   0.59630569
  0.43920000   0.88909731
  0.43920000   0.91780196
  0.43920000   0.48531176
  0.43920000   0.48638364
  0.43920000   0.96301267
  0.43920000   0.83945167
  0.43920000   0.28326308
  0.43920000   0.65099906
  0.43920000   0.73308084
  0.43920000   0.96211768
  0.43920000   0.77485331
  0.44000000   0.95777669
  0.44000000   0.76477105
  0.44000000   0.33244154
  0.44000000   0.81470362
  0.44000000   0.76646078
  0.44000000   0.74107159
  0.44000000   0.83808562
  0.44000000   0.84111997
  0.44000000   0.66200947
  0.44000000   0.70580057
  0.44000000   0.96384519
  0.44000000   0.80686838
  0.44000000   0.29571950
  0.44000000   0.72706531
  0.44000000   0.74069922
  0.44000000   0.89309086
  0.44000000   0.81215644
  0.44000000   0.52983829
  0.44000000   0.77048183
  0.44000000   0.96547187
  0.44000000   0.71889301
  0.44000000   0.31586369
  0.44000000   0.87257158
  0.44000000   0.71439027
  0.44000000   0.61622988
  0.44000000   0.92701866
  0.44000000   0.89094360
  0.44000000   0.38490428
  0.44000000   0.54790110
  0.44000000   0.87840512
  0.44000000   0.92161158
  0.44000000   0.51298003
  0.44000000   0.47808081
  0.44000000   0.97692204
  0.44000000   0.82332253
  0.44000000   0.23727650
  0.44000000   0.67075935
  0.44000000   0.65329536
  0.44000000   0.96327783
  0.44000000   0.84756392
  0.44080000   0.41628748
  0.44080000   0.56521575
  0.44080000   0.91382692
  0.44080000   0.90301336
  0.44080000   0.41975447
  0.44080000   0.52054067
  0.44080000   0.91420933
  0.44080000   0.89137242
  0.44080000   0.42531074
  0.44080000   0.55651372
  0.44080000   0.92241614
  0.44080000   0.89626661
  0.44080000   0.39615600
  0.44080000   0.53510014
  0.44080000   0.89045138
  0.44080000   0.91116520
  0.44080000   0.48540375
  0.44080000   0.50794686
  0.44080000   0.96642986
  0.44080000   0.84881930
  0.44080000   0.26630099
  0.44080000   0.62274725
  0.44080000   0.70801224
  0.44080000   0.98089865
  0.44080000   0.78910617
  0.44080000   0.23549985
  0.44080000   0.73886073
  0.44080000   0.63668779
  0.44080000   0.89471281
  0.44080000   0.90303999
  0.44080000   0.47845177
  0.44080000   0.53211870
  0.44080000   0.96449819
  0.44080000   0.86029195
  0.44080000   0.26802137
  0.44080000   0.59457083
  0.44080000   0.71181817
  0.44080000   0.98656271
  0.44080000   0.78028224
  0.44080000   0.21578842
  0.44160000   0.61482395
  0.44160000   0.45779888
  0.44160000   0.98376981
  0.44160000   0.80330438
  0.44160000   0.21874696
  0.44160000   0.70544998
  0.44160000   0.61475103
  0.44160000   0.93584734
  0.44160000   0.88414789
  0.44160000   0.35850420
  0.44160000   0.56020177
  0.44160000   0.84656342
  0.44160000   0.94038668
  0.44160000   0.58254255
  0.44160000   0.41993808
  0.44160000   0.98081031
  0.44160000   0.77113296
  0.44160000   0.24155868
  0.44160000   0.77256765
  0.44160000   0.63733468
  0.44160000   0.84431827
  0.44160000   0.93018266
  0.44160000   0.59555793
  0.44160000   0.45516545
  0.44160000   0.98717729
  0.44160000   0.79819515
  0.44160000   0.20685329
  0.44160000   0.71061607
  0.44160000   0.59180647
  0.44160000   0.93073137
  0.44160000   0.89178851
  0.44160000   0.37131487
  0.44160000   0.54181303
  0.44160000   0.86177116
  0.44160000   0.92902468
  0.44160000   0.55230165
  0.44160000   0.45751084
  0.44160000   0.98628956
  0.44160000   0.80046142
  0.44160000   0.20943166
  0.44240000   0.56441565
  0.44240000   0.82782317
  0.44240000   0.94983246
  0.44240000   0.61925170
  0.44240000   0.38639034
  0.44240000   0.96643125
  0.44240000   0.74610641
  0.44240000   0.30498659
  0.44240000   0.83405607
  0.44240000   0.71741151
  0.44240000   0.71206344
  0.44240000   0.91259035
  0.44240000   0.83566095
  0.44240000   0.46090539
  0.44240000   0.71020733
  0.44240000   0.94324908
  0.44240000   0.81647970
  0.44240000   0.36693744
  0.44240000   0.73028620
  0.44240000   0.84183336
  0.44240000   0.85288568
  0.44240000   0.64749515
  0.44240000   0.67930423
  0.44240000   0.97769757
  0.44240000   0.82012091
  0.44240000   0.23743613
  0.44240000   0.67861222
  0.44240000   0.65367910
  0.44240000   0.95836798
  0.44240000   0.85155653
  0.44240000   0.29608609
  0.44240000   0.62717679
  0.44240000   0.75670706
  0.44240000   0.96800681
  0.44240000   0.73767486
  0.44240000   0.30210415
  0.44240000   0.84492110
  0.44240000   0.70809009
  0.44240000   0.68867986
  0.44240000   0.92731388
  0.44320000   0.62370563
  0.44320000   0.99883779
  0.44320000   0.83115545
  0.44320000   0.14514929
  0.44320000   0.61581258
  0.44320000   0.48551768
  0.44320000   0.98663732
  0.44320000   0.81826635
  0.44320000   0.20036809
  0.44320000   0.66712602
  0.44320000   0.58726056
  0.44320000   0.96957228
  0.44320000   0.86281923
  0.44320000   0.24730426
  0.44320000   0.58049380
  0.44320000   0.67714702
  0.44320000   0.99408527
  0.44320000   0.80567948
  0.44320000   0.17594989
  0.44320000   0.68329019
  0.44320000   0.53885779
  0.44320000   0.95517081
  0.44320000   0.86853110
  0.44320000   0.29815574
  0.44320000   0.58395806
  0.44320000   0.76091785
  0.44320000   0.97532056
  0.44320000   0.72480468
  0.44320000   0.27678494
  0.44320000   0.85238093
  0.44320000   0.66382811
  0.44320000   0.67734219
  0.44320000   0.96724165
  0.44320000   0.82894176
  0.44320000   0.27363697
  0.44320000   0.67271128
  0.44320000   0.71622724
  0.44320000   0.95307289
  0.44320000   0.80220523
  0.44320000   0.33733269
  0.44400000   0.86414527
  0.44400000   0.25703343
  0.44400000   0.58087089
  0.44400000   0.69413462
  0.44400000   0.99163393
  0.44400000   0.79333147
  0.44400000   0.19106247
  0.44400000   0.71365609
  0.44400000   0.56218014
  0.44400000   0.92738399
  0.44400000   0.89360612
  0.44400000   0.38145905
  0.44400000   0.53984483
  0.44400000   0.87471524
  0.44400000   0.92180839
  0.44400000   0.52292431
  0.44400000   0.47968872
  0.44400000   0.98247772
  0.44400000   0.81965210
  0.44400000   0.21761261
  0.44400000   0.67163412
  0.44400000   0.61914649
  0.44400000   0.96636259
  0.44400000   0.86011532
  0.44400000   0.26159499
  0.44400000   0.59325581
  0.44400000   0.70210442
  0.44400000   0.98958282
  0.44400000   0.78770736
  0.44400000   0.20170876
  0.44400000   0.72850589
  0.44400000   0.57880613
  0.44400000   0.91056156
  0.44400000   0.90602065
  0.44400000   0.42844357
  0.44400000   0.51419161
  0.44400000   0.92304700
  0.44400000   0.88307532
  0.44400000   0.40200196
  0.44400000   0.57573482
  0.44480000   0.65886936
  0.44480000   0.35187797
  0.44480000   0.93852118
  0.44480000   0.72366265
  0.44480000   0.41244730
  0.44480000   0.89538820
  0.44480000   0.82475680
  0.44480000   0.51768563
  0.44480000   0.74361755
  0.44480000   0.96980737
  0.44480000   0.75570460
  0.44480000   0.29127940
  0.44480000   0.81626319
  0.44480000   0.70501738
  0.44480000   0.75466450
  0.44480000   0.91631352
  0.44480000   0.77890939
  0.44480000   0.47239528
  0.44480000   0.82754888
  0.44480000   0.91431848
  0.44480000   0.64539758
  0.44480000   0.50638140
  0.44480000   0.98040397
  0.44480000   0.83818634
  0.44480000   0.21861907
  0.44480000   0.63098171
  0.44480000   0.62593526
  0.44480000   0.98979482
  0.44480000   0.83900573
  0.44480000   0.18000689
  0.44480000   0.61304974
  0.44480000   0.55460628
  0.44480000   0.99548736
  0.44480000   0.83964009
  0.44480000   0.15565161
  0.44480000   0.60103626
  0.44480000   0.50749706
  0.44480000   0.99371870
  0.44480000   0.82482347
  0.44480000   0.16924441
  0.44560000   0.21603285
  0.44560000   0.66836066
  0.44560000   0.61734419
  0.44560000   0.96944893
  0.44560000   0.85833230
  0.44560000   0.25111292
  0.44560000   0.59425607
  0.44560000   0.68486381
  0.44560000   0.99306026
  0.44560000   0.80064414
  0.44560000   0.18305908
  0.44560000   0.69670927
  0.44560000   0.55111345
  0.44560000   0.94498135
  0.44560000   0.87953133
  0.44560000   0.32949968
  0.44560000   0.56518650
  0.44560000   0.80835398
  0.44560000   0.95875453
  0.44560000   0.65373358
  0.44560000   0.35240097
  0.44560000   0.94206102
  0.44560000   0.72184603
  0.44560000   0.40077411
  0.44560000   0.89492761
  0.44560000   0.81256252
  0.44560000   0.52434471
  0.44560000   0.77055633
  0.44560000   0.96457656
  0.44560000   0.71921211
  0.44560000   0.32072367
  0.44560000   0.87511149
  0.44560000   0.72097405
  0.44560000   0.60959699
  0.44560000   0.92161041
  0.44560000   0.89680566
  0.44560000   0.40001709
  0.44560000   0.53623877
  0.44560000   0.89679047
  0.44560000   0.90871324
  0.44640000   0.82435686
  0.44640000   0.22886773
  0.44640000   0.66644253
  0.44640000   0.64111708
  0.44640000   0.96968277
  0.44640000   0.84916370
  0.44640000   0.25515890
  0.44640000   0.61899266
  0.44640000   0.69141729
  0.44640000   0.98705939
  0.44640000   0.80021434
  0.44640000   0.20812558
  0.44640000   0.70807305
  0.44640000   0.59627811
  0.44640000   0.93516611
  0.44640000   0.88864134
  0.44640000   0.35890968
  0.44640000   0.54877924
  0.44640000   0.84817045
  0.44640000   0.93857535
  0.44640000   0.58025460
  0.44640000   0.42788760
  0.44640000   0.98420022
  0.44640000   0.77616918
  0.44640000   0.22777603
  0.44640000   0.75970552
  0.44640000   0.61846678
  0.44640000   0.86769047
  0.44640000   0.92620115
  0.44640000   0.53975954
  0.44640000   0.46788952
  0.44640000   0.98702513
  0.44640000   0.80787253
  0.44640000   0.20491747
  0.44640000   0.69155009
  0.44640000   0.59353327
  0.44640000   0.95145255
  0.44640000   0.87703258
  0.44640000   0.30822798
  0.44640000   0.56539375
  0.44720000   0.98558590
  0.44720000   0.83212658
  0.44720000   0.19987558
  0.44720000   0.63725825
  0.44720000   0.59119472
  0.44720000   0.98846665
  0.44720000   0.84721017
  0.44720000   0.18149797
  0.44720000   0.59419937
  0.44720000   0.55856614
  0.44720000   0.99997321
  0.44720000   0.83597144
  0.44720000   0.13892410
  0.44720000   0.60254516
  0.44720000   0.47504957
  0.44720000   0.98952338
  0.44720000   0.80880875
  0.44720000   0.19352926
  0.44720000   0.68467661
  0.44720000   0.57319579
  0.44720000   0.95717168
  0.44720000   0.87286568
  0.44720000   0.28934985
  0.44720000   0.57022498
  0.44720000   0.74831986
  0.44720000   0.98011627
  0.44720000   0.73961905
  0.44720000   0.25554287
  0.44720000   0.82642145
  0.44720000   0.64171842
  0.44720000   0.74183541
  0.44720000   0.96805528
  0.44720000   0.75949254
  0.44720000   0.29744133
  0.44720000   0.81313980
  0.44720000   0.71651756
  0.44720000   0.75952381
  0.44720000   0.90307951
  0.44720000   0.78030348
  0.44720000   0.51390665
  0.44800000   0.29165206
  0.44800000   0.56748809
  0.44800000   0.75249150
  0.44800000   0.97927177
  0.44800000   0.73461461
  0.44800000   0.26061794
  0.44800000   0.83527177
  0.44800000   0.64656121
  0.44800000   0.72186442
  0.44800000   0.97096766
  0.44800000   0.78270785
  0.44800000   0.27906521
  0.44800000   0.76843875
  0.44800000   0.70436306
  0.44800000   0.84472001
  0.44800000   0.88267174
  0.44800000   0.62578649
  0.44800000   0.60372414
  0.44800000   0.99559627
  0.44800000   0.84167315
  0.44800000   0.15629074
  0.44800000   0.59735945
  0.44800000   0.51045895
  0.44800000   0.99611961
  0.44800000   0.82454478
  0.44800000   0.16047219
  0.44800000   0.63783268
  0.44800000   0.51613276
  0.44800000   0.98427232
  0.44800000   0.83707678
  0.44800000   0.20311842
  0.44800000   0.62734991
  0.44800000   0.59826580
  0.44800000   0.99283647
  0.44800000   0.84262607
  0.44800000   0.16600348
  0.44800000   0.59879357
  0.44800000   0.52890677
  0.44800000   0.99749451
  0.44800000   0.83056202
  0.44880000   0.76605341
  0.44880000   0.24405129
  0.44880000   0.78324915
  0.44880000   0.63994689
  0.44880000   0.82832858
  0.44880000   0.93812362
  0.44880000   0.62766001
  0.44880000   0.42977446
  0.44880000   0.97619248
  0.44880000   0.78502557
  0.44880000   0.25737806
  0.44880000   0.75626332
  0.44880000   0.67213209
  0.44880000   0.86917498
  0.44880000   0.89829865
  0.44880000   0.55450583
  0.44880000   0.55806431
  0.44880000   1.00157795
  0.44880000   0.83652895
  0.44880000   0.13337099
  0.44880000   0.59941539
  0.44880000   0.46505102
  0.44880000   0.98922063
  0.44880000   0.80220435
  0.44880000   0.19805381
  0.44880000   0.70014706
  0.44880000   0.57958504
  0.44880000   0.94381221
  0.44880000   0.88338825
  0.44880000   0.33207569
  0.44880000   0.55606457
  0.44880000   0.81280487
  0.44880000   0.95655812
  0.44880000   0.64650376
  0.44880000   0.36232776
  0.44880000   0.95001314
  0.44880000   0.72925383
  0.44880000   0.37189188
  0.44880000   0.87914741
  0.44880000   0.78848076
  0.44960000   0.26031545
  0.44960000   0.73436416
  0.44960000   0.68369819
  0.44960000   0.89849134
  0.44960000   0.87221829
  0.44960000   0.48695102
  0.44960000   0.62535440
  0.44960000   0.97487871
  0.44960000   0.85246871
  0.44960000   0.23457061
  0.44960000   0.60371575
  0.44960000   0.65754788
  0.44960000   0.99691849
  0.44960000   0.81742555
  0.44960000   0.16139971
  0.44960000   0.65402867
  0.44960000   0.51716585
  0.44960000   0.97658391
  0.44960000   0.84422523
  0.44960000   0.23078026
  0.44960000   0.62198837
  0.44960000   0.64964718
  0.44960000   0.99264423
  0.44960000   0.82542061
  0.44960000   0.17543372
  0.44960000   0.64263593
  0.44960000   0.54543777
  0.44960000   0.98527398
  0.44960000   0.84639365
  0.44960000   0.19521608
  0.44960000   0.60228257
  0.44960000   0.58527209
  0.44960000   1.00042806
  0.44960000   0.83706049
  0.44960000   0.13723598
  0.44960000   0.59960371
  0.44960000   0.47267335
  0.44960000   0.99050654
  0.44960000   0.80630919
  0.44960000   0.19116124
  0.45040000   0.52694523
  0.45040000   0.92656422
  0.45040000   0.88785319
  0.45040000   0.38953204
  0.45040000   0.56116751
  0.45040000   0.88821796
  0.45040000   0.91998630
  0.45040000   0.48768584
  0.45040000   0.48361734
  0.45040000   0.96802313
  0.45040000   0.83431293
  0.45040000   0.26934538
  0.45040000   0.66054343
  0.45040000   0.71324052
  0.45040000   0.96458581
  0.45040000   0.79715138
  0.45040000   0.29862516
  0.45040000   0.74939151
  0.45040000   0.74217063
  0.45040000   0.86593100
  0.45040000   0.82722253
  0.45040000   0.60144883
  0.45040000   0.74498074
  0.45040000   0.98275152
  0.45040000   0.74433859
  0.45040000   0.24586989
  0.45040000   0.81741129
  0.45040000   0.63053183
  0.45040000   0.76369845
  0.45040000   0.96798438
  0.45040000   0.72801657
  0.45040000   0.30747213
  0.45040000   0.86140647
  0.45040000   0.70972684
  0.45040000   0.65008179
  0.45040000   0.93354346
  0.45040000   0.87339105
  0.45040000   0.37490284
  0.45040000   0.59777506
  0.45040000   0.87148121
  0.45120000   0.58383729
  0.45120000   0.98494349
  0.45120000   0.85053307
  0.45120000   0.19485738
  0.45120000   0.59221706
  0.45120000   0.58527987
  0.45120000   1.00237708
  0.45120000   0.83513477
  0.45120000   0.13015906
  0.45120000   0.60106173
  0.45120000   0.45895825
  0.45120000   0.98832173
  0.45120000   0.79776191
  0.45120000   0.20372509
  0.45120000   0.71134355
  0.45120000   0.58839055
  0.45120000   0.93299400
  0.45120000   0.89094299
  0.45120000   0.36534880
  0.45120000   0.54520445
  0.45120000   0.85777998
  0.45120000   0.93365129
  0.45120000   0.56011192
  0.45120000   0.44568360
  0.45120000   0.98836118
  0.45120000   0.78873525
  0.45120000   0.20787908
  0.45120000   0.73033988
  0.45120000   0.59201161
  0.45120000   0.91099753
  0.45120000   0.90608693
  0.45120000   0.42815500
  0.45120000   0.51631051
  0.45120000   0.92561235
  0.45120000   0.88309777
  0.45120000   0.39486129
  0.45120000   0.57610906
  0.45120000   0.89481769
  0.45120000   0.91694614
  0.45120000   0.47040050
  0.45200000   0.59120154
  0.45200000   0.87304591
  0.45200000   0.92955648
  0.45200000   0.52356667
  0.45200000   0.45711138
  0.45200000   0.98167587
  0.45200000   0.80395283
  0.45200000   0.22934024
  0.45200000   0.71025535
  0.45200000   0.63616181
  0.45200000   0.93327294
  0.45200000   0.87936569
  0.45200000   0.37193765
  0.45200000   0.58062533
  0.45200000   0.86807139
  0.45200000   0.93267047
  0.45200000   0.53467033
  0.45200000   0.44772127
  0.45200000   0.98368739
  0.45200000   0.79459166
  0.45200000   0.22495105
  0.45200000   0.72662982
  0.45200000   0.62448821
  0.45200000   0.91516806
  0.45200000   0.89647422
  0.45200000   0.42139483
  0.45200000   0.54428837
  0.45200000   0.92195553
  0.45200000   0.89540467
  0.45200000   0.39994593
  0.45200000   0.54214940
  0.45200000   0.89929248
  0.45200000   0.90959541
  0.45200000   0.46195166
  0.45200000   0.51278351
  0.45200000   0.95473548
  0.45200000   0.86066703
  0.45200000   0.30628485
  0.45200000   0.60993098
  0.45200000   0.77663462
  0.45280000   0.97920945
  0.45280000   0.82263075
  0.45280000   0.23166558
  0.45280000   0.67258480
  0.45280000   0.64749422
  0.45280000   0.96698782
  0.45280000   0.84840444
  0.45280000   0.26730530
  0.45280000   0.62687975
  0.45280000   0.71380349
  0.45280000   0.98222729
  0.45280000   0.78202619
  0.45280000   0.23615978
  0.45280000   0.75428149
  0.45280000   0.63718584
  0.45280000   0.87722049
  0.45280000   0.91520499
  0.45280000   0.52235919
  0.45280000   0.50442242
  0.45280000   0.98913864
  0.45280000   0.82902498
  0.45280000   0.18912596
  0.45280000   0.64106043
  0.45280000   0.57304592
  0.45280000   0.98873579
  0.45280000   0.84768766
  0.45280000   0.18156616
  0.45280000   0.59402181
  0.45280000   0.56085209
  0.45280000   1.00224209
  0.45280000   0.83427413
  0.45280000   0.13155357
  0.45280000   0.60389545
  0.45280000   0.46235255
  0.45280000   0.98905212
  0.45280000   0.79992164
  0.45280000   0.20046808
  0.45280000   0.70616973
  0.45280000   0.58405948
  0.45280000   0.93912172
  0.45360000   0.92425264
  0.45360000   0.82942484
  0.45360000   0.42771033
  0.45360000   0.72096285
  0.45360000   0.91538418
  0.45360000   0.82444589
  0.45360000   0.45952021
  0.45360000   0.73893341
  0.45360000   0.93889289
  0.45360000   0.78602214
  0.45360000   0.39702239
  0.45360000   0.80148805
  0.45360000   0.85812175
  0.45360000   0.73363396
  0.45360000   0.65528166
  0.45360000   0.90647720
  0.45360000   0.88965109
  0.45360000   0.45426728
  0.45360000   0.57251268
  0.45360000   0.95406165
  0.45360000   0.87720037
  0.45360000   0.30069213
  0.45360000   0.56448824
  0.45360000   0.76880384
  0.45360000   0.97589161
  0.45360000   0.71272599
  0.45360000   0.28104241
  0.45360000   0.87065825
  0.45360000   0.66339786
  0.45360000   0.63412082
  0.45360000   0.97616048
  0.45360000   0.84843940
  0.45360000   0.23258605
  0.45360000   0.61371297
  0.45360000   0.65518750
  0.45360000   0.99634599
  0.45360000   0.81939769
  0.45360000   0.16401797
  0.45360000   0.65154020
  0.45360000   0.52401679
  0.45440000   0.56935754
  0.45440000   0.43673823
  0.45440000   0.98861159
  0.45440000   0.78083396
  0.45440000   0.21075917
  0.45440000   0.74634589
  0.45440000   0.59409483
  0.45440000   0.89090224
  0.45440000   0.91927164
  0.45440000   0.48087559
  0.45440000   0.48616743
  0.45440000   0.96544352
  0.45440000   0.83801151
  0.45440000   0.27826036
  0.45440000   0.65615792
  0.45440000   0.72978799
  0.45440000   0.96476529
  0.45440000   0.77774680
  0.45440000   0.30610239
  0.45440000   0.78822987
  0.45440000   0.74186065
  0.45440000   0.80413657
  0.45440000   0.85780249
  0.45440000   0.72959838
  0.45440000   0.65763916
  0.45440000   0.91176790
  0.45440000   0.88497809
  0.45440000   0.44074117
  0.45440000   0.58343744
  0.45440000   0.94308560
  0.45440000   0.88555318
  0.45440000   0.33531929
  0.45440000   0.55293991
  0.45440000   0.81970566
  0.45440000   0.95493722
  0.45440000   0.63410539
  0.45440000   0.37153734
  0.45440000   0.96054067
  0.45440000   0.73345477
  0.45440000   0.33434236
  0.45520000   0.23828730
  0.45520000   0.60047195
  0.45520000   0.66622733
  0.45520000   0.99842986
  0.45520000   0.81038186
  0.45520000   0.15951492
  0.45520000   0.66866951
  0.45520000   0.51361027
  0.45520000   0.96862526
  0.45520000   0.84941254
  0.45520000   0.26032588
  0.45520000   0.62208991
  0.45520000   0.70303172
  0.45520000   0.98677050
  0.45520000   0.78934147
  0.45520000   0.21579655
  0.45520000   0.73333066
  0.45520000   0.60722044
  0.45520000   0.90856775
  0.45520000   0.90605362
  0.45520000   0.43655589
  0.45520000   0.51970809
  0.45520000   0.93535025
  0.45520000   0.87823277
  0.45520000   0.36577997
  0.45520000   0.58289906
  0.45520000   0.86151541
  0.45520000   0.93680032
  0.45520000   0.54920624
  0.45520000   0.43593297
  0.45520000   0.98602724
  0.45520000   0.78223505
  0.45520000   0.22094054
  0.45520000   0.74818216
  0.45520000   0.61238420
  0.45520000   0.88825025
  0.45520000   0.91771252
  0.45520000   0.48979026
  0.45520000   0.49292552
  0.45520000   0.97231102
  0.45600000   0.90442623
  0.45600000   0.47249343
  0.45600000   0.53232096
  0.45600000   0.96610164
  0.45600000   0.85996029
  0.45600000   0.26545964
  0.45600000   0.59800640
  0.45600000   0.71316434
  0.45600000   0.99096457
  0.45600000   0.77529389
  0.45600000   0.20408087
  0.45600000   0.75352079
  0.45600000   0.58022200
  0.45600000   0.88106402
  0.45600000   0.92633522
  0.45600000   0.50426582
  0.45600000   0.46705074
  0.45600000   0.97639167
  0.45600000   0.81612528
  0.45600000   0.24633745
  0.45600000   0.69296181
  0.45600000   0.67102482
  0.45600000   0.94842095
  0.45600000   0.84840297
  0.45600000   0.33672671
  0.45600000   0.65208745
  0.45600000   0.81974186
  0.45600000   0.93696210
  0.45600000   0.64781657
  0.45600000   0.43494291
  0.45600000   0.97046758
  0.45600000   0.79497100
  0.45600000   0.27811262
  0.45600000   0.74743715
  0.45600000   0.71167494
  0.45600000   0.87780665
  0.45600000   0.85894004
  0.45600000   0.55511541
  0.45600000   0.67012051
  0.45600000   1.00000039
  0.45680000   0.99444202
  0.45680000   0.84037462
  0.45680000   0.16248037
  0.45680000   0.60383894
  0.45680000   0.52513310
  0.45680000   0.99943417
  0.45680000   0.82730030
  0.45680000   0.14730297
  0.45680000   0.62701307
  0.45680000   0.49402371
  0.45680000   0.98898851
  0.45680000   0.82150955
  0.45680000   0.19296164
  0.45680000   0.65944181
  0.45680000   0.57922443
  0.45680000   0.97965120
  0.45680000   0.85523692
  0.45680000   0.21483813
  0.45680000   0.58977001
  0.45680000   0.62440578
  0.45680000   1.00378118
  0.45680000   0.82633615
  0.45680000   0.12982082
  0.45680000   0.62147670
  0.45680000   0.45957084
  0.45680000   0.98529083
  0.45680000   0.80106628
  0.45680000   0.21634927
  0.45680000   0.71120987
  0.45680000   0.61360383
  0.45680000   0.93486668
  0.45680000   0.88615674
  0.45680000   0.36300151
  0.45680000   0.56007016
  0.45680000   0.85774732
  0.45680000   0.93770288
  0.45680000   0.55801924
  0.45680000   0.43378882
  0.45680000   0.98749912
  0.45680000   0.77883593
  0.45760000   0.64724366
  0.45760000   0.73618901
  0.45760000   0.96923265
  0.45760000   0.76608271
  0.45760000   0.29391129
  0.45760000   0.80410792
  0.45760000   0.71748483
  0.45760000   0.78104758
  0.45760000   0.89798289
  0.45760000   0.74992524
  0.45760000   0.54208407
  0.45760000   0.88694224
  0.45760000   0.91995940
  0.45760000   0.49315199
  0.45760000   0.48739827
  0.45760000   0.97461265
  0.45760000   0.83190343
  0.45760000   0.24699805
  0.45760000   0.65917519
  0.45760000   0.67811901
  0.45760000   0.97437590
  0.45760000   0.82261955
  0.45760000   0.25240650
  0.45760000   0.68192191
  0.45760000   0.68416172
  0.45760000   0.95680544
  0.45760000   0.83189041
  0.45760000   0.31477911
  0.45760000   0.68421966
  0.45760000   0.78416342
  0.45760000   0.92897205
  0.45760000   0.72323036
  0.45760000   0.45056595
  0.45760000   0.90909297
  0.45760000   0.85457000
  0.45760000   0.46541888
  0.45760000   0.67055375
  0.45760000   0.95869118
  0.45760000   0.84152187
  0.45760000   0.30353219
  0.45840000   0.78793117
  0.45840000   0.34165246
  0.45840000   0.78323526
  0.45840000   0.79678436
  0.45840000   0.79636733
  0.45840000   0.77261049
  0.45840000   0.78249417
  0.45840000   0.82160128
  0.45840000   0.78916294
  0.45840000   0.72602316
  0.45840000   0.80998169
  0.45840000   0.87837049
  0.45840000   0.70837023
  0.45840000   0.60971468
  0.45840000   0.94152552
  0.45840000   0.88525264
  0.45840000   0.34267071
  0.45840000   0.55763354
  0.45840000   0.83197494
  0.45840000   0.95146875
  0.45840000   0.61047385
  0.45840000   0.38693631
  0.45840000   0.97423189
  0.45840000   0.74132966
  0.45840000   0.28157595
  0.45840000   0.83654199
  0.45840000   0.68319656
  0.45840000   0.71828430
  0.45840000   0.95047205
  0.45840000   0.80389483
  0.45840000   0.35073829
  0.45840000   0.75591955
  0.45840000   0.81863260
  0.45840000   0.83205695
  0.45840000   0.71343731
  0.45840000   0.72460383
  0.45840000   0.92062503
  0.45840000   0.81898894
  0.45840000   0.44721368
  0.45840000   0.75035609
  0.45920000   0.29178148
  0.45920000   0.58106258
  0.45920000   0.75700070
  0.45920000   0.98169211
  0.45920000   0.72617403
  0.45920000   0.25674055
  0.45920000   0.84699268
  0.45920000   0.63670222
  0.45920000   0.69900923
  0.45920000   0.98440640
  0.45920000   0.79642856
  0.45920000   0.22426669
  0.45920000   0.72448761
  0.45920000   0.62639684
  0.45920000   0.92044400
  0.45920000   0.89330559
  0.45920000   0.40769464
  0.45920000   0.55271106
  0.45920000   0.91109208
  0.45920000   0.90550494
  0.45920000   0.42957168
  0.45920000   0.52121906
  0.45920000   0.93053261
  0.45920000   0.88278272
  0.45920000   0.38029430
  0.45920000   0.57561480
  0.45920000   0.88087527
  0.45920000   0.92677856
  0.45920000   0.50483769
  0.45920000   0.46683237
  0.45920000   0.97779011
  0.45920000   0.81492812
  0.45920000   0.24223035
  0.45920000   0.69455324
  0.45920000   0.66469201
  0.45920000   0.94892336
  0.45920000   0.85273552
  0.45920000   0.33343425
  0.45920000   0.64121121
  0.45920000   0.81733689
  0.46000000   0.75157581
  0.46000000   0.98497368
  0.46000000   0.73307955
  0.46000000   0.24293146
  0.46000000   0.83340108
  0.46000000   0.62032567
  0.46000000   0.73256503
  0.46000000   0.98360062
  0.46000000   0.75967848
  0.46000000   0.24070139
  0.46000000   0.79471061
  0.46000000   0.63336629
  0.46000000   0.81226396
  0.46000000   0.95132979
  0.46000000   0.65355479
  0.46000000   0.38526452
  0.46000000   0.95626411
  0.46000000   0.75410361
  0.46000000   0.34643652
  0.46000000   0.84095316
  0.46000000   0.77845975
  0.46000000   0.68462778
  0.46000000   0.83678588
  0.46000000   0.90854899
  0.46000000   0.63106048
  0.46000000   0.53130971
  0.46000000   0.99541380
  0.46000000   0.83600795
  0.46000000   0.16245474
  0.46000000   0.61498649
  0.46000000   0.52641557
  0.46000000   0.99852983
  0.46000000   0.82920736
  0.46000000   0.15148137
  0.46000000   0.62524202
  0.46000000   0.50385153
  0.46000000   0.99235074
  0.46000000   0.82428098
  0.46000000   0.17904595
  0.46000000   0.64811131
  0.46080000   0.77177510
  0.46080000   0.24015296
  0.46080000   0.77495021
  0.46080000   0.63965058
  0.46080000   0.84707991
  0.46080000   0.93206145
  0.46080000   0.58973517
  0.46080000   0.45586867
  0.46080000   0.99454555
  0.46080000   0.79236182
  0.46080000   0.18418341
  0.46080000   0.71545674
  0.46080000   0.55450181
  0.46080000   0.93131401
  0.46080000   0.89174940
  0.46080000   0.37241385
  0.46080000   0.54796165
  0.46080000   0.87053982
  0.46080000   0.92949260
  0.46080000   0.53110141
  0.46080000   0.46125581
  0.46080000   0.98816991
  0.46080000   0.80181223
  0.46080000   0.20650547
  0.46080000   0.70681615
  0.46080000   0.59832792
  0.46080000   0.94174175
  0.46080000   0.88493799
  0.46080000   0.34092171
  0.46080000   0.55799597
  0.46080000   0.82983777
  0.46080000   0.95242744
  0.46080000   0.61409276
  0.46080000   0.38385875
  0.46080000   0.97292518
  0.46080000   0.73845901
  0.46080000   0.28790986
  0.46080000   0.84317202
  0.46080000   0.69038119
  0.46080000   0.70217298
  0.46160000   0.98742394
  0.46160000   0.83242998
  0.46160000   0.19672437
  0.46160000   0.63800039
  0.46160000   0.59075096
  0.46160000   0.99363575
  0.46160000   0.84301925
  0.46160000   0.16583025
  0.46160000   0.59980469
  0.46160000   0.53364856
  0.46160000   1.00280541
  0.46160000   0.82727163
  0.46160000   0.13439871
  0.46160000   0.62194596
  0.46160000   0.47044375
  0.46160000   0.98877431
  0.46160000   0.80631009
  0.46160000   0.20149450
  0.46160000   0.69554809
  0.46160000   0.59113883
  0.46160000   0.95298420
  0.46160000   0.87679320
  0.46160000   0.30540248
  0.46160000   0.56886049
  0.46160000   0.77866464
  0.46160000   0.97474470
  0.46160000   0.69702259
  0.46160000   0.29103277
  0.46160000   0.89230434
  0.46160000   0.66761707
  0.46160000   0.57552262
  0.46160000   0.97734193
  0.46160000   0.85884169
  0.46160000   0.22394105
  0.46160000   0.58558511
  0.46160000   0.64303409
  0.46160000   1.00474742
  0.46160000   0.81791606
  0.46160000   0.13097515
  0.46160000   0.64093238
  0.46240000   0.82482457
  0.46240000   0.85738031
  0.46240000   0.68835676
  0.46240000   0.66986035
  0.46240000   0.95707038
  0.46240000   0.84478233
  0.46240000   0.30953807
  0.46240000   0.65380545
  0.46240000   0.78257298
  0.46240000   0.95293319
  0.46240000   0.70887734
  0.46240000   0.37174525
  0.46240000   0.90739176
  0.46240000   0.77357947
  0.46240000   0.50631927
  0.46240000   0.84761933
  0.46240000   0.92891140
  0.46240000   0.59106329
  0.46240000   0.46727769
  0.46240000   0.99728681
  0.46240000   0.79900439
  0.46240000   0.17087447
  0.46240000   0.69741482
  0.46240000   0.53350207
  0.46240000   0.94928724
  0.46240000   0.87322874
  0.46240000   0.32103995
  0.46240000   0.58438758
  0.46240000   0.80281810
  0.46240000   0.96613737
  0.46240000   0.66011762
  0.46240000   0.33016224
  0.46240000   0.93593626
  0.46240000   0.69718270
  0.46240000   0.43276338
  0.46240000   0.93460366
  0.46240000   0.82087551
  0.46240000   0.39906545
  0.46240000   0.73557633
  0.46240000   0.88483059
  0.46320000   0.84275454
  0.46320000   0.24238819
  0.46320000   0.63311045
  0.46320000   0.67454323
  0.46320000   0.99040976
  0.46320000   0.81143301
  0.46320000   0.19441714
  0.46320000   0.68280739
  0.46320000   0.58124745
  0.46320000   0.96516656
  0.46320000   0.86798151
  0.46320000   0.26574250
  0.46320000   0.57856061
  0.46320000   0.71607567
  0.46320000   0.99391180
  0.46320000   0.76912526
  0.46320000   0.19595064
  0.46320000   0.76150901
  0.46320000   0.56453199
  0.46320000   0.87098077
  0.46320000   0.93265715
  0.46320000   0.52803632
  0.46320000   0.45112976
  0.46320000   0.98596778
  0.46320000   0.79551518
  0.46320000   0.21849031
  0.46320000   0.72436789
  0.46320000   0.61697357
  0.46320000   0.92233118
  0.46320000   0.89532670
  0.46320000   0.40076716
  0.46320000   0.54614099
  0.46320000   0.90456636
  0.46320000   0.90886792
  0.46320000   0.44806075
  0.46320000   0.51613039
  0.46320000   0.94796897
  0.46320000   0.86809102
  0.46320000   0.32898935
  0.46320000   0.60117735
  0.46400000   0.21470957
  0.46400000   0.70448833
  0.46400000   0.61503849
  0.46400000   0.94494705
  0.46400000   0.87941068
  0.46400000   0.33363112
  0.46400000   0.57212926
  0.46400000   0.82140638
  0.46400000   0.95855437
  0.46400000   0.62813221
  0.46400000   0.36195893
  0.46400000   0.96294794
  0.46400000   0.71965651
  0.46400000   0.33166490
  0.46400000   0.88285449
  0.46400000   0.73515876
  0.46400000   0.59046316
  0.46400000   0.91089896
  0.46400000   0.90935235
  0.46400000   0.42904946
  0.46400000   0.51095023
  0.46400000   0.93076650
  0.46400000   0.87880576
  0.46400000   0.38279663
  0.46400000   0.58898003
  0.46400000   0.88582809
  0.46400000   0.92439172
  0.46400000   0.49324040
  0.46400000   0.47485381
  0.46400000   0.97466675
  0.46400000   0.82347622
  0.46400000   0.25198721
  0.46400000   0.68118446
  0.46400000   0.68568762
  0.46400000   0.95931913
  0.46400000   0.82896165
  0.46400000   0.30839317
  0.46400000   0.69027133
  0.46400000   0.77568593
  0.46400000   0.92854960
  0.46480000   0.69483727
  0.46480000   0.83939426
  0.46480000   0.89778754
  0.46480000   0.63183014
  0.46480000   0.56548924
  0.46480000   0.99896165
  0.46480000   0.84003458
  0.46480000   0.14680700
  0.46480000   0.59920079
  0.46480000   0.49786324
  0.46480000   1.00024119
  0.46480000   0.81406899
  0.46480000   0.15200940
  0.46480000   0.65878738
  0.46480000   0.50331800
  0.46480000   0.97731551
  0.46480000   0.83721211
  0.46480000   0.23468733
  0.46480000   0.64314385
  0.46480000   0.66042704
  0.46480000   0.98803801
  0.46480000   0.82316898
  0.46480000   0.19919650
  0.46480000   0.66018570
  0.46480000   0.59407290
  0.46480000   0.98250682
  0.46480000   0.85253036
  0.46480000   0.20697553
  0.46480000   0.59487719
  0.46480000   0.61302383
  0.46480000   1.00684078
  0.46480000   0.82687745
  0.46480000   0.11855257
  0.46480000   0.61604742
  0.46480000   0.44007646
  0.46480000   0.98583859
  0.46480000   0.78420070
  0.46480000   0.22276628
  0.46480000   0.74688465
  0.46480000   0.61855129
  0.46560000   0.22279404
  0.46560000   0.76325482
  0.46560000   0.61383681
  0.46560000   0.86919289
  0.46560000   0.93029931
  0.46560000   0.53499519
  0.46560000   0.46072002
  0.46560000   0.99098706
  0.46560000   0.79896790
  0.46560000   0.19747388
  0.46560000   0.70936894
  0.46560000   0.58256076
  0.46560000   0.94077497
  0.46560000   0.88740136
  0.46560000   0.34359160
  0.46560000   0.55314901
  0.46560000   0.83501050
  0.46560000   0.95027786
  0.46560000   0.60438354
  0.46560000   0.39364648
  0.46560000   0.97940786
  0.46560000   0.74449412
  0.46560000   0.26242557
  0.46560000   0.82644009
  0.46560000   0.65787780
  0.46560000   0.74690511
  0.46560000   0.96359294
  0.46560000   0.75718873
  0.46560000   0.32089137
  0.46560000   0.82967003
  0.46560000   0.74933816
  0.46560000   0.72169078
  0.46560000   0.87725365
  0.46560000   0.85056469
  0.46560000   0.56362908
  0.46560000   0.69539742
  0.46560000   1.00062605
  0.46560000   0.78637015
  0.46560000   0.16351153
  0.46560000   0.71847931
  0.46640000   0.88531572
  0.46640000   0.54061914
  0.46640000   0.60204357
  0.46640000   1.00626266
  0.46640000   0.83212077
  0.46640000   0.12029192
  0.46640000   0.60575399
  0.46640000   0.44523957
  0.46640000   0.99046903
  0.46640000   0.78526388
  0.46640000   0.20444287
  0.46640000   0.73782380
  0.46640000   0.58841798
  0.46640000   0.90686841
  0.46640000   0.91131066
  0.46640000   0.43987685
  0.46640000   0.50778470
  0.46640000   0.94100549
  0.46640000   0.86973061
  0.46640000   0.35322189
  0.46640000   0.60555221
  0.46640000   0.84912359
  0.46640000   0.94314509
  0.46640000   0.57684396
  0.46640000   0.41935730
  0.46640000   0.98895100
  0.46640000   0.76390689
  0.46640000   0.21862248
  0.46640000   0.78005955
  0.46640000   0.60092326
  0.46640000   0.84222279
  0.46640000   0.94801229
  0.46640000   0.58991399
  0.46640000   0.40233333
  0.46640000   0.98414510
  0.46640000   0.75021306
  0.46640000   0.24223219
  0.46640000   0.81051442
  0.46640000   0.63070058
  0.46640000   0.78349271
  0.46720000   0.30995345
  0.46720000   0.86145643
  0.46720000   0.71668840
  0.46720000   0.65395037
  0.46720000   0.93139168
  0.46720000   0.87445214
  0.46720000   0.38481033
  0.46720000   0.60279652
  0.46720000   0.88946440
  0.46720000   0.92119668
  0.46720000   0.48568311
  0.46720000   0.48538483
  0.46720000   0.97307397
  0.46720000   0.83199569
  0.46720000   0.25512385
  0.46720000   0.66418466
  0.46720000   0.69480041
  0.46720000   0.97156641
  0.46720000   0.81096605
  0.46720000   0.27090875
  0.46720000   0.71588178
  0.46720000   0.71187062
  0.46720000   0.92170668
  0.46720000   0.83236582
  0.46720000   0.43887531
  0.46720000   0.72163216
  0.46720000   0.93037079
  0.46720000   0.81521890
  0.46720000   0.41817123
  0.46720000   0.75436337
  0.46720000   0.90155526
  0.46720000   0.79153697
  0.46720000   0.52007081
  0.46720000   0.81969580
  0.46720000   0.95022645
  0.46720000   0.63975235
  0.46720000   0.39332353
  0.46720000   0.96825116
  0.46720000   0.75432720
  0.46720000   0.30384634
  0.46800000   0.65121604
  0.46800000   0.69320202
  0.46800000   0.98017377
  0.46800000   0.80507364
  0.46800000   0.23985919
  0.46800000   0.71568024
  0.46800000   0.65912106
  0.46800000   0.93100851
  0.46800000   0.87069944
  0.46800000   0.38789291
  0.46800000   0.61389111
  0.46800000   0.89283752
  0.46800000   0.91659450
  0.46800000   0.47907635
  0.46800000   0.49940130
  0.46800000   0.97114303
  0.46800000   0.84182322
  0.46800000   0.25799621
  0.46800000   0.64263964
  0.46800000   0.70245019
  0.46800000   0.98295833
  0.46800000   0.79377184
  0.46800000   0.23331572
  0.46800000   0.73489317
  0.46800000   0.64263676
  0.46800000   0.90936528
  0.46800000   0.89514674
  0.46800000   0.44336679
  0.46800000   0.55862699
  0.46800000   0.94929443
  0.46800000   0.88008931
  0.46800000   0.31857898
  0.46800000   0.56630531
  0.46800000   0.80104069
  0.46800000   0.96808373
  0.46800000   0.66230432
  0.46800000   0.32453165
  0.46800000   0.93417743
  0.46800000   0.69094339
  0.46800000   0.44184951
  0.46880000   0.50601875
  0.46880000   0.94568997
  0.46880000   0.86540734
  0.46880000   0.33958553
  0.46880000   0.61328690
  0.46880000   0.83114153
  0.46880000   0.95082727
  0.46880000   0.61329088
  0.46880000   0.39270286
  0.46880000   0.97812223
  0.46880000   0.74469269
  0.46880000   0.26850500
  0.46880000   0.82926449
  0.46880000   0.66751313
  0.46880000   0.74059857
  0.46880000   0.96006283
  0.46880000   0.76899943
  0.46880000   0.33131209
  0.46880000   0.81547805
  0.46880000   0.77188721
  0.46880000   0.74629174
  0.46880000   0.83696928
  0.46880000   0.84127257
  0.46880000   0.67128981
  0.46880000   0.71454124
  0.46880000   0.96528985
  0.46880000   0.79801317
  0.46880000   0.30171279
  0.46880000   0.75391541
  0.46880000   0.75177299
  0.46880000   0.86275199
  0.46880000   0.81952901
  0.46880000   0.61815265
  0.46880000   0.76823192
  0.46880000   0.97753040
  0.46880000   0.71457913
  0.46880000   0.28010950
  0.46880000   0.87224687
  0.46880000   0.66436632
  0.46880000   0.63542442
  0.46960000   0.83901285
  0.46960000   0.95254555
  0.46960000   0.59509453
  0.46960000   0.38757719
  0.46960000   0.98085239
  0.46960000   0.73672633
  0.46960000   0.26035605
  0.46960000   0.83724969
  0.46960000   0.65021355
  0.46960000   0.72480085
  0.46960000   0.97550994
  0.46960000   0.77645958
  0.46960000   0.27008620
  0.46960000   0.78109448
  0.46960000   0.69156129
  0.46960000   0.83328159
  0.46960000   0.90577469
  0.46960000   0.64195066
  0.46960000   0.54241493
  0.46960000   0.99486570
  0.46960000   0.83969543
  0.46960000   0.16522043
  0.46960000   0.60893931
  0.46960000   0.53556310
  0.46960000   1.00441618
  0.46960000   0.82667075
  0.46960000   0.13014072
  0.46960000   0.62238999
  0.46960000   0.46497296
  0.46960000   0.99057130
  0.46960000   0.80086140
  0.46960000   0.19868345
  0.46960000   0.70659756
  0.46960000   0.58641437
  0.46960000   0.94498536
  0.46960000   0.88410781
  0.46960000   0.33133648
  0.46960000   0.55954779
  0.46960000   0.81960378
  0.46960000   0.95943609
  0.47040000   0.19158974
  0.47040000   0.76076747
  0.47040000   0.55922043
  0.47040000   0.87483325
  0.47040000   0.93148534
  0.47040000   0.51955216
  0.47040000   0.45696482
  0.47040000   0.98654259
  0.47040000   0.80003181
  0.47040000   0.21654152
  0.47040000   0.71633668
  0.47040000   0.61789684
  0.47040000   0.93441955
  0.47040000   0.88723714
  0.47040000   0.36675620
  0.47040000   0.56238923
  0.47040000   0.86789699
  0.47040000   0.93547098
  0.47040000   0.53505257
  0.47040000   0.44493545
  0.47040000   0.98953101
  0.47040000   0.78729090
  0.47040000   0.20930012
  0.47040000   0.73715933
  0.47040000   0.59912332
  0.47040000   0.90933248
  0.47040000   0.90922707
  0.47040000   0.43438107
  0.47040000   0.51449175
  0.47040000   0.93833241
  0.47040000   0.87530967
  0.47040000   0.36014483
  0.47040000   0.59378943
  0.47040000   0.85992691
  0.47040000   0.94007143
  0.47040000   0.55249112
  0.47040000   0.43045017
  0.47040000   0.99057329
  0.47040000   0.77324057
  0.47040000   0.21008536
  0.47120000   0.70989597
  0.47120000   0.29912579
  0.47120000   0.88478811
  0.47120000   0.68711427
  0.47120000   0.59796079
  0.47120000   0.96589521
  0.47120000   0.86795381
  0.47120000   0.26552002
  0.47120000   0.58070151
  0.47120000   0.71903007
  0.47120000   0.99617791
  0.47120000   0.76406522
  0.47120000   0.19087446
  0.47120000   0.76894161
  0.47120000   0.55500234
  0.47120000   0.86171819
  0.47120000   0.93835388
  0.47120000   0.54917157
  0.47120000   0.43643329
  0.47120000   0.99152010
  0.47120000   0.77792509
  0.47120000   0.20478702
  0.47120000   0.75191486
  0.47120000   0.58658989
  0.47120000   0.88905671
  0.47120000   0.92389456
  0.47120000   0.48513401
  0.47120000   0.47769182
  0.47120000   0.97274814
  0.47120000   0.82715387
  0.47120000   0.25948464
  0.47120000   0.67760075
  0.47120000   0.70154612
  0.47120000   0.96173314
  0.47120000   0.81279217
  0.47120000   0.30855183
  0.47120000   0.72706985
  0.47120000   0.77022639
  0.47120000   0.89350805
  0.47120000   0.77276149
  0.47200000   0.97699464
  0.47200000   0.70393911
  0.47200000   0.28553719
  0.47200000   0.88649514
  0.47200000   0.66504813
  0.47200000   0.59686214
  0.47200000   0.98353138
  0.47200000   0.85315837
  0.47200000   0.20513834
  0.47200000   0.59420491
  0.47200000   0.61272684
  0.47200000   1.00993829
  0.47200000   0.82425354
  0.47200000   0.10851166
  0.47200000   0.61801127
  0.47200000   0.42234518
  0.47200000   0.98378542
  0.47200000   0.76946188
  0.47200000   0.23843031
  0.47200000   0.78005832
  0.47200000   0.63756645
  0.47200000   0.84230483
  0.47200000   0.93778366
  0.47200000   0.59798241
  0.47200000   0.44031992
  0.47200000   0.99411266
  0.47200000   0.77934667
  0.47200000   0.19390983
  0.47200000   0.74490547
  0.47200000   0.56866619
  0.47200000   0.89896160
  0.47200000   0.91741982
  0.47200000   0.46051423
  0.47200000   0.49455545
  0.47200000   0.95841084
  0.47200000   0.84953900
  0.47200000   0.30284701
  0.47200000   0.64186456
  0.47200000   0.77657874
  0.47200000   0.96389093
  0.47280000   0.78990661
  0.47280000   0.31176747
  0.47280000   0.77358660
  0.47280000   0.76142150
  0.47280000   0.82980249
  0.47280000   0.82287023
  0.47280000   0.69724220
  0.47280000   0.75333961
  0.47280000   0.93422048
  0.47280000   0.77262030
  0.47280000   0.42415089
  0.47280000   0.83808047
  0.47280000   0.87535031
  0.47280000   0.65021509
  0.47280000   0.63135583
  0.47280000   0.99239069
  0.47280000   0.83680932
  0.47280000   0.17817295
  0.47280000   0.62211732
  0.47280000   0.56132545
  0.47280000   1.00375564
  0.47280000   0.83324572
  0.47280000   0.13095001
  0.47280000   0.60843032
  0.47280000   0.46861401
  0.47280000   0.99641613
  0.47280000   0.79830720
  0.47280000   0.17653474
  0.47280000   0.70240924
  0.47280000   0.54642222
  0.47280000   0.94889361
  0.47280000   0.87758415
  0.47280000   0.32172672
  0.47280000   0.57537591
  0.47280000   0.80742257
  0.47280000   0.96692476
  0.47280000   0.65070587
  0.47280000   0.33182622
  0.47280000   0.94503785
  0.47280000   0.69344996
  0.47360000   0.60995904
  0.47360000   0.39932038
  0.47360000   0.98081317
  0.47360000   0.74788316
  0.47360000   0.25761550
  0.47360000   0.82125663
  0.47360000   0.65376194
  0.47360000   0.76130173
  0.47360000   0.96389122
  0.47360000   0.73589482
  0.47360000   0.32832373
  0.47360000   0.86451807
  0.47360000   0.74345094
  0.47360000   0.64129886
  0.47360000   0.90128703
  0.47360000   0.90307049
  0.47360000   0.46458398
  0.47360000   0.54129252
  0.47360000   0.96766128
  0.47360000   0.86228376
  0.47360000   0.26210348
  0.47360000   0.59472935
  0.47360000   0.71410763
  0.47360000   0.99710402
  0.47360000   0.76875059
  0.47360000   0.18616056
  0.47360000   0.75971435
  0.47360000   0.54992539
  0.47360000   0.87687944
  0.47360000   0.92899340
  0.47360000   0.51587839
  0.47360000   0.46595924
  0.47360000   0.98774328
  0.47360000   0.80582271
  0.47360000   0.21009837
  0.47360000   0.70273145
  0.47360000   0.61019231
  0.47360000   0.95042072
  0.47360000   0.87713380
  0.47360000   0.31722530
  0.47440000   0.81688399
  0.47440000   0.95523669
  0.47440000   0.64143053
  0.47440000   0.37716549
  0.47440000   0.96486748
  0.47440000   0.73795776
  0.47440000   0.32341255
  0.47440000   0.86010013
  0.47440000   0.73873751
  0.47440000   0.65419402
  0.47440000   0.90665248
  0.47440000   0.89264957
  0.47440000   0.45506394
  0.47440000   0.57087508
  0.47440000   0.96217544
  0.47440000   0.87177375
  0.47440000   0.27773628
  0.47440000   0.57591013
  0.47440000   0.74027708
  0.47440000   0.99165862
  0.47440000   0.74167784
  0.47440000   0.21741987
  0.47440000   0.81407130
  0.47440000   0.58701965
  0.47440000   0.78040326
  0.47440000   0.97896949
  0.47440000   0.69172168
  0.47440000   0.28022967
  0.47440000   0.89660657
  0.47440000   0.64982851
  0.47440000   0.56962539
  0.47440000   0.99326691
  0.47440000   0.84484376
  0.47440000   0.17001464
  0.47440000   0.59937025
  0.47440000   0.54674899
  0.47440000   1.00879921
  0.47440000   0.82519929
  0.47440000   0.11310816
  0.47440000   0.61814778
  0.47520000   0.60084821
  0.47520000   0.81545294
  0.47520000   0.96299981
  0.47520000   0.63824347
  0.47520000   0.34886626
  0.47520000   0.95787938
  0.47520000   0.70715616
  0.47520000   0.35705064
  0.47520000   0.90813220
  0.47520000   0.75541233
  0.47520000   0.51342557
  0.47520000   0.88173972
  0.47520000   0.91531187
  0.47520000   0.51281072
  0.47520000   0.51113868
  0.47520000   0.99412625
  0.47520000   0.82793671
  0.47520000   0.17477767
  0.47520000   0.64082094
  0.47520000   0.55380089
  0.47520000   0.99628099
  0.47520000   0.83868247
  0.47520000   0.16008834
  0.47520000   0.60940531
  0.47520000   0.52715058
  0.47520000   1.00525328
  0.47520000   0.82243457
  0.47520000   0.12960689
  0.47520000   0.63191289
  0.47520000   0.46508104
  0.47520000   0.98883327
  0.47520000   0.80237768
  0.47520000   0.20658010
  0.47520000   0.70796018
  0.47520000   0.60260872
  0.47520000   0.94545814
  0.47520000   0.88232206
  0.47520000   0.33179488
  0.47520000   0.56628884
  0.47520000   0.82257856
  0.47600000   0.35823478
  0.47600000   0.56631460
  0.47600000   0.85937740
  0.47600000   0.94205450
  0.47600000   0.55301812
  0.47600000   0.42569002
  0.47600000   0.99148615
  0.47600000   0.76791502
  0.47600000   0.20989147
  0.47600000   0.77175292
  0.47600000   0.59082180
  0.47600000   0.85994407
  0.47600000   0.94192962
  0.47600000   0.55170471
  0.47600000   0.42597979
  0.47600000   0.99125369
  0.47600000   0.76830576
  0.47600000   0.21064161
  0.47600000   0.77140055
  0.47600000   0.59227517
  0.47600000   0.86048736
  0.47600000   0.94144268
  0.47600000   0.55064779
  0.47600000   0.42758867
  0.47600000   0.99141291
  0.47600000   0.76968924
  0.47600000   0.20949971
  0.47600000   0.76863740
  0.47600000   0.59114438
  0.47600000   0.86500285
  0.47600000   0.93895800
  0.47600000   0.54080823
  0.47600000   0.43547339
  0.47600000   0.99097027
  0.47600000   0.77749225
  0.47600000   0.20858510
  0.47600000   0.75514271
  0.47600000   0.59404881
  0.47600000   0.88605133
  0.47600000   0.92598977
  0.47680000   0.66376673
  0.47680000   0.64537772
  0.47680000   0.98210503
  0.47680000   0.83755937
  0.47680000   0.21936823
  0.47680000   0.63859976
  0.47680000   0.63802939
  0.47680000   0.99705377
  0.47680000   0.82738401
  0.47680000   0.16315003
  0.47680000   0.63691484
  0.47680000   0.53204680
  0.47680000   0.99690716
  0.47680000   0.83220503
  0.47680000   0.16079956
  0.47680000   0.62481688
  0.47680000   0.52819270
  0.47680000   1.00129515
  0.47680000   0.82649651
  0.47680000   0.14492144
  0.47680000   0.63027248
  0.47680000   0.49639962
  0.47680000   0.99526726
  0.47680000   0.81724421
  0.47680000   0.17423399
  0.47680000   0.66362375
  0.47680000   0.55011233
  0.47680000   0.98306820
  0.47680000   0.84956260
  0.47680000   0.20850920
  0.47680000   0.60488594
  0.47680000   0.61987401
  0.47680000   1.00916279
  0.47680000   0.82224188
  0.47680000   0.11362366
  0.47680000   0.62503933
  0.47680000   0.43383446
  0.47680000   0.98554079
  0.47680000   0.77878582
  0.47680000   0.22936309
  0.47760000   0.68589453
  0.47760000   0.45124445
  0.47760000   0.95407723
  0.47760000   0.82348731
  0.47760000   0.33307506
  0.47760000   0.71448034
  0.47760000   0.81137246
  0.47760000   0.89387730
  0.47760000   0.69787584
  0.47760000   0.57319201
  0.47760000   0.95864855
  0.47760000   0.87606510
  0.47760000   0.28944750
  0.47760000   0.56958348
  0.47760000   0.76026157
  0.47760000   0.98637553
  0.47760000   0.71778036
  0.47760000   0.24623091
  0.47760000   0.85691167
  0.47760000   0.61735393
  0.47760000   0.68233864
  0.47760000   1.00105039
  0.47760000   0.79646753
  0.47760000   0.16073361
  0.47760000   0.69996488
  0.47760000   0.51846169
  0.47760000   0.95078985
  0.47760000   0.86755340
  0.47760000   0.32180633
  0.47760000   0.60396250
  0.47760000   0.80930743
  0.47760000   0.96513489
  0.47760000   0.64889536
  0.47760000   0.34064287
  0.47760000   0.95041225
  0.47760000   0.70208474
  0.47760000   0.38613128
  0.47760000   0.92280310
  0.47760000   0.78167582
  0.47760000   0.45850052
  0.47840000   0.95966164
  0.47840000   0.81614015
  0.47840000   0.31607714
  0.47840000   0.72453866
  0.47840000   0.78443034
  0.47840000   0.89349193
  0.47840000   0.74972523
  0.47840000   0.56178675
  0.47840000   0.89605234
  0.47840000   0.92146021
  0.47840000   0.46831189
  0.47840000   0.48563432
  0.47840000   0.96552918
  0.47840000   0.83911150
  0.47840000   0.28334484
  0.47840000   0.66139024
  0.47840000   0.74610005
  0.47840000   0.96486005
  0.47840000   0.75755602
  0.47840000   0.31985093
  0.47840000   0.83218765
  0.47840000   0.74964324
  0.47840000   0.71996352
  0.47840000   0.88151161
  0.47840000   0.85246415
  0.47840000   0.55369256
  0.47840000   0.69487929
  0.47840000   1.00375941
  0.47840000   0.78372306
  0.47840000   0.15492072
  0.47840000   0.72110802
  0.47840000   0.50267021
  0.47840000   0.92636644
  0.47840000   0.87924810
  0.47840000   0.39969763
  0.47840000   0.59687234
  0.47840000   0.91043389
  0.47840000   0.90986506
  0.47840000   0.43177376
  0.47840000   0.51464515
  0.47920000   0.80745583
  0.47920000   0.82930350
  0.47920000   0.74201956
  0.47920000   0.73005420
  0.47920000   0.89047360
  0.47920000   0.83518606
  0.47920000   0.53748357
  0.47920000   0.73541864
  0.47920000   0.99081927
  0.47920000   0.75052140
  0.47920000   0.22058514
  0.47920000   0.80414766
  0.47920000   0.59892773
  0.47920000   0.80257865
  0.47920000   0.97047107
  0.47920000   0.65864519
  0.47920000   0.32015302
  0.47920000   0.93825141
  0.47920000   0.68275742
  0.47920000   0.43328529
  0.47920000   0.95345011
  0.47920000   0.80831849
  0.47920000   0.34262211
  0.47920000   0.75009794
  0.47920000   0.81550323
  0.47920000   0.84707843
  0.47920000   0.71722115
  0.47920000   0.69532746
  0.47920000   0.92960570
  0.47920000   0.84635033
  0.47920000   0.40940189
  0.47920000   0.68595452
  0.47920000   0.91342675
  0.47920000   0.86517915
  0.47920000   0.45129513
  0.47920000   0.64816950
  0.47920000   0.95822745
  0.47920000   0.85752768
  0.47920000   0.30188766
  0.47920000   0.62372805
  0.48000000   0.44145509
  0.48000000   0.96233782
  0.48000000   0.80835516
  0.48000000   0.30994815
  0.48000000   0.73885231
  0.48000000   0.77182197
  0.48000000   0.88039015
  0.48000000   0.77987287
  0.48000000   0.58971830
  0.48000000   0.84949502
  0.48000000   0.95022677
  0.48000000   0.57286939
  0.48000000   0.39951604
  0.48000000   0.98848820
  0.48000000   0.74366961
  0.48000000   0.23109909
  0.48000000   0.81814570
  0.48000000   0.61117919
  0.48000000   0.77362635
  0.48000000   0.97947010
  0.48000000   0.70316419
  0.48000000   0.27808219
  0.48000000   0.88608924
  0.48000000   0.65417007
  0.48000000   0.60190280
  0.48000000   0.99314363
  0.48000000   0.84348826
  0.48000000   0.17271455
  0.48000000   0.60473403
  0.48000000   0.55395585
  0.48000000   1.01041570
  0.48000000   0.82504431
  0.48000000   0.10767916
  0.48000000   0.61646453
  0.48000000   0.42349869
  0.48000000   0.98707388
  0.48000000   0.76755473
  0.48000000   0.22813119
  0.48000000   0.78044627
  0.48000000   0.62132606
  0.48080000   0.94994635
  0.48080000   0.85213676
  0.48080000   0.33464763
  0.48080000   0.64901014
  0.48080000   0.82594960
  0.48080000   0.94190150
  0.48080000   0.63299339
  0.48080000   0.42790359
  0.48080000   0.98426249
  0.48080000   0.77695351
  0.48080000   0.23759095
  0.48080000   0.76937892
  0.48080000   0.64311225
  0.48080000   0.86332342
  0.48080000   0.92593960
  0.48080000   0.55578139
  0.48080000   0.48264535
  0.48080000   1.00516413
  0.48080000   0.80165084
  0.48080000   0.14140939
  0.48080000   0.68131299
  0.48080000   0.48482406
  0.48080000   0.96405299
  0.48080000   0.83867112
  0.48080000   0.28890253
  0.48080000   0.66479755
  0.48080000   0.75500690
  0.48080000   0.96027011
  0.48080000   0.74834324
  0.48080000   0.34046328
  0.48080000   0.85343679
  0.48080000   0.76833011
  0.48080000   0.66400386
  0.48080000   0.86404445
  0.48080000   0.91434434
  0.48080000   0.56293785
  0.48080000   0.52102168
  0.48080000   1.01167348
  0.48080000   0.81604688
  0.48080000   0.10739266
  0.48160000   0.78063594
  0.48160000   0.26259253
  0.48160000   0.77294207
  0.48160000   0.68458093
  0.48160000   0.85191013
  0.48160000   0.90438491
  0.48160000   0.59985827
  0.48160000   0.55272230
  0.48160000   1.01346541
  0.48160000   0.82353637
  0.48160000   0.09623314
  0.48160000   0.61461878
  0.48160000   0.40089479
  0.48160000   0.98245038
  0.48160000   0.74810835
  0.48160000   0.25341822
  0.48160000   0.82093214
  0.48160000   0.64860944
  0.48160000   0.76531339
  0.48160000   0.96777546
  0.48160000   0.72662889
  0.48160000   0.31852877
  0.48160000   0.87502346
  0.48160000   0.72434239
  0.48160000   0.62080964
  0.48160000   0.93026497
  0.48160000   0.89174507
  0.48160000   0.38054737
  0.48160000   0.55703280
  0.48160000   0.88893863
  0.48160000   0.92422882
  0.48160000   0.48653187
  0.48160000   0.48055913
  0.48160000   0.97782587
  0.48160000   0.82506855
  0.48160000   0.24330736
  0.48160000   0.67793677
  0.48160000   0.67732864
  0.48160000   0.96941556
  0.48160000   0.82831009
  0.48240000   0.97570415
  0.48240000   0.73939735
  0.48240000   0.28491295
  0.48240000   0.84639525
  0.48240000   0.68915478
  0.48240000   0.70235949
  0.48240000   0.95692277
  0.48240000   0.81764175
  0.48240000   0.32767101
  0.48240000   0.72683517
  0.48240000   0.80246772
  0.48240000   0.88483164
  0.48240000   0.72252247
  0.48240000   0.59572164
  0.48240000   0.93420755
  0.48240000   0.89512603
  0.48240000   0.36557209
  0.48240000   0.54296482
  0.48240000   0.87001591
  0.48240000   0.93331996
  0.48240000   0.53253156
  0.48240000   0.45656413
  0.48240000   0.99538129
  0.48240000   0.79181531
  0.48240000   0.18703336
  0.48240000   0.72124730
  0.48240000   0.56570878
  0.48240000   0.93322091
  0.48240000   0.89429079
  0.48240000   0.36818420
  0.48240000   0.54580157
  0.48240000   0.87312911
  0.48240000   0.93172338
  0.48240000   0.52501745
  0.48240000   0.46102457
  0.48240000   0.99354134
  0.48240000   0.79683055
  0.48240000   0.19251295
  0.48240000   0.71418001
  0.48240000   0.57776403
  0.48320000   0.95603121
  0.48320000   0.80413483
  0.48320000   0.33729919
  0.48320000   0.75818863
  0.48320000   0.80713957
  0.48320000   0.84015470
  0.48320000   0.73912811
  0.48320000   0.70769748
  0.48320000   0.90138290
  0.48320000   0.85470745
  0.48320000   0.49601588
  0.48320000   0.68490548
  0.48320000   0.98593291
  0.48320000   0.80895122
  0.48320000   0.22003934
  0.48320000   0.70294205
  0.48320000   0.63214584
  0.48320000   0.95298157
  0.48320000   0.86930440
  0.48320000   0.31493702
  0.48320000   0.59867046
  0.48320000   0.80167470
  0.48320000   0.97114350
  0.48320000   0.65949600
  0.48320000   0.31871005
  0.48320000   0.93819553
  0.48320000   0.68092447
  0.48320000   0.43511327
  0.48320000   0.95669981
  0.48320000   0.80756204
  0.48320000   0.33210699
  0.48320000   0.74917951
  0.48320000   0.80229154
  0.48320000   0.85521623
  0.48320000   0.74040254
  0.48320000   0.67048824
  0.48320000   0.90622902
  0.48320000   0.88423408
  0.48320000   0.46371975
  0.48320000   0.60016172
  0.48400000   0.98384223
  0.48400000   0.80943277
  0.48400000   0.22710602
  0.48400000   0.70471566
  0.48400000   0.64423651
  0.48400000   0.95007270
  0.48400000   0.86581986
  0.48400000   0.32738131
  0.48400000   0.61242481
  0.48400000   0.81963218
  0.48400000   0.96039008
  0.48400000   0.63197700
  0.48400000   0.36229557
  0.48400000   0.96752253
  0.48400000   0.71731503
  0.48400000   0.32163894
  0.48400000   0.88765231
  0.48400000   0.72114400
  0.48400000   0.58692775
  0.48400000   0.93568126
  0.48400000   0.89417889
  0.48400000   0.36087340
  0.48400000   0.54454717
  0.48400000   0.86449759
  0.48400000   0.93703537
  0.48400000   0.54424972
  0.48400000   0.44536524
  0.48400000   0.99677910
  0.48400000   0.78103217
  0.48400000   0.18571137
  0.48400000   0.74033336
  0.48400000   0.55833227
  0.48400000   0.90922502
  0.48400000   0.91109533
  0.48400000   0.43517660
  0.48400000   0.51330979
  0.48400000   0.94380863
  0.48400000   0.87172254
  0.48400000   0.34577662
  0.48400000   0.60287502
  0.48480000   0.70288194
  0.48480000   0.31166726
  0.48480000   0.89998027
  0.48480000   0.69831795
  0.48480000   0.55601421
  0.48480000   0.95951690
  0.48480000   0.87334194
  0.48480000   0.28881549
  0.48480000   0.57842016
  0.48480000   0.76198464
  0.48480000   0.98815965
  0.48480000   0.71351798
  0.48480000   0.24234148
  0.48480000   0.86162663
  0.48480000   0.60929716
  0.48480000   0.67316652
  0.48480000   1.00714517
  0.48480000   0.79759706
  0.48480000   0.13620106
  0.48480000   0.68728537
  0.48480000   0.47482288
  0.48480000   0.95872430
  0.48480000   0.83677538
  0.48480000   0.31071226
  0.48480000   0.67838580
  0.48480000   0.78816141
  0.48480000   0.93967033
  0.48480000   0.71073797
  0.48480000   0.42584310
  0.48480000   0.92691974
  0.48480000   0.82286078
  0.48480000   0.42996918
  0.48480000   0.74647615
  0.48480000   0.92084166
  0.48480000   0.79201977
  0.48480000   0.46417587
  0.48480000   0.81635242
  0.48480000   0.92339019
  0.48480000   0.66845011
  0.48480000   0.48883611
  0.48560000   0.62616703
  0.48560000   0.65818752
  0.48560000   1.00449644
  0.48560000   0.81046946
  0.48560000   0.14230009
  0.48560000   0.66473784
  0.48560000   0.49106411
  0.48560000   0.97931634
  0.48560000   0.82940574
  0.48560000   0.23580018
  0.48560000   0.66577984
  0.48560000   0.66721353
  0.48560000   0.98115944
  0.48560000   0.82531241
  0.48560000   0.23128190
  0.48560000   0.67315089
  0.48560000   0.65827837
  0.48560000   0.97715278
  0.48560000   0.83491140
  0.48560000   0.24247475
  0.48560000   0.65628178
  0.48560000   0.68047634
  0.48560000   0.98546443
  0.48560000   0.81161905
  0.48560000   0.22050324
  0.48560000   0.69775626
  0.48560000   0.63442628
  0.48560000   0.95844445
  0.48560000   0.86355338
  0.48560000   0.29839430
  0.48560000   0.60821538
  0.48560000   0.77690094
  0.48560000   0.97970076
  0.48560000   0.69696773
  0.48560000   0.28006042
  0.48560000   0.89422476
  0.48560000   0.65281734
  0.48560000   0.58033774
  0.48560000   0.99593394
  0.48560000   0.84261932
  0.48640000   0.59543392
  0.48640000   1.00200507
  0.48640000   0.83661758
  0.48640000   0.14092647
  0.48640000   0.60714093
  0.48640000   0.49389606
  0.48640000   1.00588884
  0.48640000   0.80593860
  0.48640000   0.13723355
  0.48640000   0.67125748
  0.48640000   0.47979756
  0.48640000   0.97285604
  0.48640000   0.82768750
  0.48640000   0.26184480
  0.48640000   0.68047496
  0.48640000   0.71001717
  0.48640000   0.96248013
  0.48640000   0.80403952
  0.48640000   0.31344040
  0.48640000   0.75047274
  0.48640000   0.77555333
  0.48640000   0.86472217
  0.48640000   0.78422701
  0.48640000   0.63227217
  0.48640000   0.84275998
  0.48640000   0.94486677
  0.48640000   0.59407110
  0.48640000   0.42142666
  0.48640000   0.99538421
  0.48640000   0.76058444
  0.48640000   0.19964301
  0.48640000   0.78085171
  0.48640000   0.57150919
  0.48640000   0.84802359
  0.48640000   0.95115328
  0.48640000   0.57505896
  0.48640000   0.39813188
  0.48640000   0.98992790
  0.48640000   0.74039546
  0.48640000   0.22796613
  0.48720000   0.67252122
  0.48720000   0.29433029
  0.48720000   0.92113945
  0.48720000   0.65698053
  0.48720000   0.49701114
  0.48720000   0.98702603
  0.48720000   0.82726229
  0.48720000   0.20706475
  0.48720000   0.65865512
  0.48720000   0.61702406
  0.48720000   0.99125517
  0.48720000   0.84057446
  0.48720000   0.18312709
  0.48720000   0.61731777
  0.48720000   0.57582245
  0.48720000   1.01071200
  0.48720000   0.82669225
  0.48720000   0.10742122
  0.48720000   0.61331310
  0.48720000   0.42573421
  0.48720000   0.99085549
  0.48720000   0.76619991
  0.48720000   0.21531937
  0.48720000   0.77848956
  0.48720000   0.60090569
  0.48720000   0.85221926
  0.48720000   0.94696495
  0.48720000   0.56792128
  0.48720000   0.41301032
  0.48720000   0.99368185
  0.48720000   0.75274033
  0.48720000   0.20897161
  0.48720000   0.79677782
  0.48720000   0.58220770
  0.48720000   0.81931082
  0.48720000   0.96595035
  0.48720000   0.62811269
  0.48720000   0.34271819
  0.48720000   0.96356905
  0.48720000   0.69450185
  0.48800000   0.62966344
  0.48800000   0.65296821
  0.48800000   1.00542669
  0.48800000   0.81342874
  0.48800000   0.13802996
  0.48800000   0.65703727
  0.48800000   0.48462847
  0.48800000   0.98425807
  0.48800000   0.82107558
  0.48800000   0.22075247
  0.48800000   0.67817200
  0.48800000   0.63919371
  0.48800000   0.97602350
  0.48800000   0.84617408
  0.48800000   0.24150492
  0.48800000   0.62971640
  0.48800000   0.68229334
  0.48800000   0.99925638
  0.48800000   0.79709811
  0.48800000   0.17050108
  0.48800000   0.70457403
  0.48800000   0.53980166
  0.48800000   0.95193974
  0.48800000   0.87479118
  0.48800000   0.31546622
  0.48800000   0.58495425
  0.48800000   0.80397161
  0.48800000   0.97240903
  0.48800000   0.65366071
  0.48800000   0.31596316
  0.48800000   0.94194487
  0.48800000   0.67403561
  0.48800000   0.42464533
  0.48800000   0.96114412
  0.48800000   0.79388757
  0.48800000   0.32250615
  0.48800000   0.77367091
  0.48800000   0.78132605
  0.48800000   0.82684643
  0.48800000   0.79499384
  0.48880000   0.60475875
  0.48880000   0.62255251
  0.48880000   1.01395176
  0.48880000   0.81688459
  0.48880000   0.09876527
  0.48880000   0.63065671
  0.48880000   0.40762775
  0.48880000   0.98109460
  0.48880000   0.75690417
  0.48880000   0.25842649
  0.48880000   0.81166193
  0.48880000   0.66348479
  0.48880000   0.78574201
  0.48880000   0.95343373
  0.48880000   0.70479429
  0.48880000   0.37961617
  0.48880000   0.92195424
  0.48880000   0.77632793
  0.48880000   0.46674943
  0.48880000   0.84586110
  0.48880000   0.91102854
  0.48880000   0.61108015
  0.48880000   0.53466835
  0.48880000   1.01256833
  0.48880000   0.81984582
  0.48880000   0.10387456
  0.48880000   0.62699538
  0.48880000   0.41859744
  0.48880000   0.98547093
  0.48880000   0.76452731
  0.48880000   0.23850417
  0.48880000   0.79158000
  0.48880000   0.63792763
  0.48880000   0.82773307
  0.48880000   0.94903545
  0.48880000   0.62425305
  0.48880000   0.40607856
  0.48880000   0.98474218
  0.48880000   0.75418155
  0.48880000   0.24569741
  0.48960000   0.79439405
  0.48960000   0.97694922
  0.48960000   0.66814578
  0.48960000   0.29706523
  0.48960000   0.92591959
  0.48960000   0.65785069
  0.48960000   0.48200769
  0.48960000   0.98491324
  0.48960000   0.82005336
  0.48960000   0.21954127
  0.48960000   0.68030930
  0.48960000   0.63736926
  0.48960000   0.97516000
  0.48960000   0.84796270
  0.48960000   0.24436792
  0.48960000   0.62694056
  0.48960000   0.68811979
  0.48960000   0.99987380
  0.48960000   0.79158247
  0.48960000   0.17064344
  0.48960000   0.71529038
  0.48960000   0.53809177
  0.48960000   0.94085750
  0.48960000   0.88346432
  0.48960000   0.34980843
  0.48960000   0.57323273
  0.48960000   0.85307272
  0.48960000   0.94848372
  0.48960000   0.56470106
  0.48960000   0.40837619
  0.48960000   0.99304480
  0.48960000   0.74851477
  0.48960000   0.21372208
  0.48960000   0.80551103
  0.48960000   0.58781193
  0.48960000   0.80329096
  0.48960000   0.97372883
  0.48960000   0.65436199
  0.48960000   0.31149269
  0.48960000   0.94039008
  0.49040000   0.91281153
  0.49040000   0.90998786
  0.49040000   0.42581324
  0.49040000   0.51676220
  0.49040000   0.93780080
  0.49040000   0.87865993
  0.49040000   0.36383838
  0.49040000   0.59166255
  0.49040000   0.87211627
  0.49040000   0.93727939
  0.49040000   0.52465174
  0.49040000   0.44499948
  0.49040000   0.99289097
  0.49040000   0.78424056
  0.49040000   0.20245218
  0.49040000   0.74325224
  0.49040000   0.59099384
  0.49040000   0.90850885
  0.49040000   0.91363601
  0.49040000   0.43674208
  0.49040000   0.50785875
  0.49040000   0.94691541
  0.49040000   0.86724768
  0.49040000   0.33872563
  0.49040000   0.61429675
  0.49040000   0.83791225
  0.49040000   0.95239109
  0.49040000   0.59835159
  0.49040000   0.39537940
  0.49040000   0.98889363
  0.49040000   0.73838575
  0.49040000   0.23408358
  0.49040000   0.82862559
  0.49040000   0.61376634
  0.49040000   0.75442411
  0.49040000   0.98847747
  0.49040000   0.72535291
  0.49040000   0.24024068
  0.49040000   0.84816130
  0.49040000   0.61455930
  0.49120000   0.45789541
  0.49120000   0.97893203
  0.49120000   0.80806729
  0.49120000   0.24920764
  0.49120000   0.71832550
  0.49120000   0.68233921
  0.49120000   0.93278186
  0.49120000   0.85502447
  0.49120000   0.39567609
  0.49120000   0.66419005
  0.49120000   0.90567397
  0.49120000   0.88840776
  0.49120000   0.46322032
  0.49120000   0.59051014
  0.49120000   0.97493147
  0.49120000   0.86127300
  0.49120000   0.23850429
  0.49120000   0.59146521
  0.49120000   0.68001099
  0.49120000   1.01024803
  0.49120000   0.78814875
  0.49120000   0.12805940
  0.49120000   0.70168760
  0.49120000   0.45755224
  0.49120000   0.94403124
  0.49120000   0.83632886
  0.49120000   0.36541937
  0.49120000   0.69987049
  0.49120000   0.86255765
  0.49120000   0.88603645
  0.49120000   0.58653475
  0.49120000   0.61067224
  0.49120000   1.01942475
  0.49120000   0.81609721
  0.49120000   0.07611540
  0.49120000   0.62150812
  0.49120000   0.36243892
  0.49120000   0.97211892
  0.49120000   0.71139631
  0.49120000   0.30678401
  0.49200000   0.26953272
  0.49200000   0.64609141
  0.49200000   0.73028098
  0.49200000   0.98274239
  0.49200000   0.76334373
  0.49200000   0.25253944
  0.49200000   0.80056754
  0.49200000   0.66011814
  0.49200000   0.80997939
  0.49200000   0.94663907
  0.49200000   0.66470705
  0.49200000   0.41232351
  0.49200000   0.96668445
  0.49200000   0.77759447
  0.49200000   0.30953967
  0.49200000   0.79950716
  0.49200000   0.75291521
  0.49200000   0.79166286
  0.49200000   0.85769514
  0.49200000   0.76170634
  0.49200000   0.66065530
  0.49200000   0.87984701
  0.49200000   0.90997272
  0.49200000   0.52556736
  0.49200000   0.53615708
  0.49200000   1.00854314
  0.49200000   0.82421955
  0.49200000   0.12025899
  0.49200000   0.62586211
  0.49200000   0.45339744
  0.49200000   0.99511284
  0.49200000   0.78778138
  0.49200000   0.19171037
  0.49200000   0.73209418
  0.49200000   0.57440890
  0.49200000   0.92353963
  0.49200000   0.90308337
  0.49200000   0.39608929
  0.49200000   0.53058330
  0.49200000   0.90860786
  0.49280000   0.59947810
  0.49280000   0.68552854
  0.49280000   1.01071993
  0.49280000   0.78483182
  0.49280000   0.12859104
  0.49280000   0.70840507
  0.49280000   0.45801374
  0.49280000   0.93796520
  0.49280000   0.84205946
  0.49280000   0.38422989
  0.49280000   0.69281184
  0.49280000   0.88787274
  0.49280000   0.87767313
  0.49280000   0.52315302
  0.49280000   0.63085921
  0.49280000   1.00848710
  0.49280000   0.82046529
  0.49280000   0.12258578
  0.49280000   0.63518586
  0.49280000   0.45759233
  0.49280000   0.99244663
  0.49280000   0.79370952
  0.49280000   0.20055575
  0.49280000   0.72525415
  0.49280000   0.59316778
  0.49280000   0.93257315
  0.49280000   0.89562609
  0.49280000   0.37121401
  0.49280000   0.54587302
  0.49280000   0.88070227
  0.49280000   0.92893758
  0.49280000   0.50743991
  0.49280000   0.47196406
  0.49280000   0.99170421
  0.49280000   0.80657548
  0.49280000   0.19879066
  0.49280000   0.69966273
  0.49280000   0.59639106
  0.49280000   0.96082835
  0.49280000   0.87229507
  0.49360000   0.37074098
  0.49360000   0.57752740
  0.49360000   0.88204325
  0.49360000   0.93240209
  0.49360000   0.50149277
  0.49360000   0.45985646
  0.49360000   0.98675372
  0.49360000   0.80223901
  0.49360000   0.22111329
  0.49360000   0.71839823
  0.49360000   0.63337847
  0.49360000   0.93958417
  0.49360000   0.88010270
  0.49360000   0.35773163
  0.49360000   0.58665917
  0.49360000   0.86542754
  0.49360000   0.94230502
  0.49360000   0.53873916
  0.49360000   0.43007879
  0.49360000   0.99509125
  0.49360000   0.76852773
  0.49360000   0.20003168
  0.49360000   0.76951219
  0.49360000   0.57848386
  0.49360000   0.86992794
  0.49360000   0.94009468
  0.49360000   0.52858497
  0.49360000   0.43676693
  0.49360000   0.99347091
  0.49360000   0.77623065
  0.49360000   0.20393030
  0.49360000   0.75841005
  0.49360000   0.58971124
  0.49360000   0.88759982
  0.49360000   0.92847643
  0.49360000   0.48867821
  0.49360000   0.47100110
  0.49360000   0.98161777
  0.49360000   0.81522735
  0.49360000   0.23588573
  0.49440000   0.93372183
  0.49440000   0.50619494
  0.49440000   0.45629160
  0.49440000   0.98866355
  0.49440000   0.79759415
  0.49440000   0.21552662
  0.49440000   0.72508884
  0.49440000   0.62168861
  0.49440000   0.93272099
  0.49440000   0.88989106
  0.49440000   0.37509808
  0.49440000   0.56452058
  0.49440000   0.88724675
  0.49440000   0.92833117
  0.49440000   0.48980326
  0.49440000   0.47198031
  0.49440000   0.98278658
  0.49440000   0.81492647
  0.49440000   0.23161939
  0.49440000   0.69738382
  0.49440000   0.65745090
  0.49440000   0.95967758
  0.49440000   0.85119905
  0.49440000   0.30282144
  0.49440000   0.64361858
  0.49440000   0.78457935
  0.49440000   0.96657108
  0.49440000   0.69580324
  0.49440000   0.33442636
  0.49440000   0.91786341
  0.49440000   0.72051156
  0.49440000   0.49877382
  0.49440000   0.93334465
  0.49440000   0.87477882
  0.49440000   0.38263718
  0.49440000   0.60951058
  0.49440000   0.89655225
  0.49440000   0.91958152
  0.49440000   0.46954919
  0.49440000   0.49730551
  0.49520000   0.94091143
  0.49520000   0.54018567
  0.49520000   0.43560188
  0.49520000   0.99728473
  0.49520000   0.77152811
  0.49520000   0.19028522
  0.49520000   0.76040242
  0.49520000   0.56389513
  0.49520000   0.88447705
  0.49520000   0.93032313
  0.49520000   0.49618310
  0.49520000   0.46652164
  0.49520000   0.98564825
  0.49520000   0.80821600
  0.49520000   0.22330279
  0.49520000   0.70769603
  0.49520000   0.64044180
  0.49520000   0.95132912
  0.49520000   0.86745741
  0.49520000   0.32413394
  0.49520000   0.60996935
  0.49520000   0.81912138
  0.49520000   0.96403366
  0.49520000   0.63059215
  0.49520000   0.35278730
  0.49520000   0.96830949
  0.49520000   0.70454405
  0.49520000   0.32523262
  0.49520000   0.90585222
  0.49520000   0.71572261
  0.49520000   0.53778384
  0.49520000   0.94365891
  0.49520000   0.88296921
  0.49520000   0.34207643
  0.49520000   0.57387955
  0.49520000   0.84488465
  0.49520000   0.95450652
  0.49520000   0.58039730
  0.49520000   0.38930337
  0.49520000   0.99020537
  0.49600000   0.28468862
  0.49600000   0.61397775
  0.49600000   0.75881223
  0.49600000   0.98781211
  0.49600000   0.71885781
  0.49600000   0.24621703
  0.49600000   0.85953287
  0.49600000   0.61955709
  0.49600000   0.68223673
  0.49600000   1.00678012
  0.49600000   0.79057242
  0.49600000   0.14381973
  0.49600000   0.70548133
  0.49600000   0.49003806
  0.49600000   0.94786460
  0.49600000   0.85662242
  0.49600000   0.34220660
  0.49600000   0.64445504
  0.49600000   0.84231560
  0.49600000   0.93950049
  0.49600000   0.59890496
  0.49600000   0.44320970
  0.49600000   1.00277085
  0.49600000   0.77339147
  0.49600000   0.16688570
  0.49600000   0.74659434
  0.49600000   0.52391381
  0.49600000   0.90206855
  0.49600000   0.90851428
  0.49600000   0.46048145
  0.49600000   0.53095901
  0.49600000   0.97146423
  0.49600000   0.85627980
  0.49600000   0.25531107
  0.49600000   0.61220927
  0.49600000   0.71017876
  0.49600000   1.00208241
  0.49600000   0.76790759
  0.49600000   0.17217066
  0.49600000   0.75815985
  0.49680000   0.76418054
  0.49680000   0.17306033
  0.49680000   0.76476345
  0.49680000   0.53007904
  0.49680000   0.87580064
  0.49680000   0.92849192
  0.49680000   0.52177189
  0.49680000   0.47670575
  0.49680000   1.00022922
  0.49680000   0.80169314
  0.49680000   0.16653193
  0.49680000   0.69507508
  0.49680000   0.53711917
  0.49680000   0.96428475
  0.49680000   0.86402049
  0.49680000   0.27802106
  0.49680000   0.60164151
  0.49680000   0.74859584
  0.49680000   0.99395221
  0.49680000   0.72784500
  0.49680000   0.21885910
  0.49680000   0.83694916
  0.49680000   0.58362490
  0.49680000   0.73818070
  0.49680000   1.00002276
  0.49680000   0.73693057
  0.49680000   0.19122527
  0.49680000   0.81287493
  0.49680000   0.54460834
  0.49680000   0.78921102
  0.49680000   0.97785951
  0.49680000   0.67734414
  0.49680000   0.29471896
  0.49680000   0.91991503
  0.49680000   0.65959712
  0.49680000   0.50406206
  0.49680000   0.98980719
  0.49680000   0.82848880
  0.49680000   0.19753590
  0.49680000   0.65331362
  0.49760000   0.71562220
  0.49760000   0.75138393
  0.49760000   0.92139422
  0.49760000   0.78653881
  0.49760000   0.46832488
  0.49760000   0.83169600
  0.49760000   0.92218540
  0.49760000   0.63758838
  0.49760000   0.50080983
  0.49760000   1.00248001
  0.49760000   0.81540122
  0.49760000   0.15175499
  0.49760000   0.66058744
  0.49760000   0.51477892
  0.49760000   0.98981520
  0.49760000   0.83245192
  0.49760000   0.19525063
  0.49760000   0.64334366
  0.49760000   0.60040859
  0.49760000   1.00419427
  0.49760000   0.83143155
  0.49760000   0.13594504
  0.49760000   0.61764802
  0.49760000   0.48717661
  0.49760000   1.00584620
  0.49760000   0.80127623
  0.49760000   0.14226091
  0.49760000   0.68413515
  0.49760000   0.49140283
  0.49760000   0.96845295
  0.49760000   0.83933635
  0.49760000   0.27562480
  0.49760000   0.66197837
  0.49760000   0.73979392
  0.49760000   0.97197231
  0.49760000   0.76045276
  0.49760000   0.29730534
  0.49760000   0.82424144
  0.49760000   0.72375578
  0.49760000   0.75083571
  0.49840000   0.60384945
  0.49840000   0.65742072
  0.49840000   1.01425518
  0.49840000   0.79969258
  0.49840000   0.10768252
  0.49840000   0.67068152
  0.49840000   0.42450295
  0.49840000   0.96583384
  0.49840000   0.78850781
  0.49840000   0.30920159
  0.49840000   0.78123957
  0.49840000   0.76121436
  0.49840000   0.82398709
  0.49840000   0.83187713
  0.49840000   0.71169389
  0.49840000   0.73875671
  0.49840000   0.93168228
  0.49840000   0.79760666
  0.49840000   0.43040711
  0.49840000   0.80323922
  0.49840000   0.90439281
  0.49840000   0.71061192
  0.49840000   0.54623729
  0.49840000   0.95197968
  0.49840000   0.87953057
  0.49840000   0.31579898
  0.49840000   0.57527435
  0.49840000   0.80871367
  0.49840000   0.97369656
  0.49840000   0.64397006
  0.49840000   0.31599978
  0.49840000   0.95028527
  0.49840000   0.66835403
  0.49840000   0.39970735
  0.49840000   0.96229141
  0.49840000   0.76744871
  0.49840000   0.33134279
  0.49840000   0.82592966
  0.49840000   0.77402227
  0.49840000   0.73170333
  0.49920000   0.58647454
  0.49920000   0.90004591
  0.49920000   0.92138982
  0.49920000   0.45844644
  0.49920000   0.49090827
  0.49920000   0.96619330
  0.49920000   0.84258171
  0.49920000   0.28383711
  0.49920000   0.65839242
  0.49920000   0.75469525
  0.49920000   0.97056016
  0.49920000   0.74124982
  0.49920000   0.30969058
  0.49920000   0.85758394
  0.49920000   0.72527985
  0.49920000   0.67249238
  0.49920000   0.93038085
  0.49920000   0.86663984
  0.49920000   0.39940869
  0.49920000   0.63806748
  0.49920000   0.91601908
  0.49920000   0.89711511
  0.49920000   0.42654563
  0.49920000   0.55946972
  0.49920000   0.94555878
  0.49920000   0.88588433
  0.49920000   0.33419257
  0.49920000   0.56401672
  0.49920000   0.83511577
  0.49920000   0.96001882
  0.49920000   0.59894624
  0.49920000   0.37059761
  0.49920000   0.98418782
  0.49920000   0.71324918
  0.49920000   0.26249757
  0.49920000   0.87329411
  0.49920000   0.63947648
  0.49920000   0.64570827
  0.49920000   1.00520454
  0.49920000   0.81656499
  0.50000000   0.89879560
  0.50000000   0.85548098
  0.50000000   0.50716398
  0.50000000   0.69066146
  0.50000000   0.99661666
  0.50000000   0.79412192
  0.50000000   0.18718819
  0.50000000   0.72024131
  0.50000000   0.57256559
  0.50000000   0.94145697
  0.50000000   0.89042532
  0.50000000   0.34568740
  0.50000000   0.55509949
  0.50000000   0.85085839
  0.50000000   0.95034536
  0.50000000   0.56968586
  0.50000000   0.40587319
  0.50000000   0.99622760
  0.50000000   0.74289152
  0.50000000   0.20565466
  0.50000000   0.81181556
  0.50000000   0.57283099
  0.50000000   0.79413785
  0.50000000   0.98079560
  0.50000000   0.66588637
  0.50000000   0.28602622
  0.50000000   0.92589223
  0.50000000   0.64162403
  0.50000000   0.48758099
  0.50000000   0.99862651
  0.50000000   0.81052058
  0.50000000   0.17032466
  0.50000000   0.67967269
  0.50000000   0.54864188
  0.50000000   0.97992707
  0.50000000   0.85305958
  0.50000000   0.22463535
  0.50000000   0.60781271
  0.50000000   0.65789859
  0.50000000   1.01377456
  0.50080000   0.82804080
  0.50080000   0.68942698
  0.50080000   0.75076465
  0.50080000   0.94945047
  0.50080000   0.76565537
  0.50080000   0.38088528
  0.50080000   0.84615387
  0.50080000   0.82945782
  0.50080000   0.66172229
  0.50080000   0.75381646
  0.50080000   0.97102029
  0.50080000   0.74353517
  0.50080000   0.30830117
  0.50080000   0.85452885
  0.50080000   0.72557567
  0.50080000   0.68080530
  0.50080000   0.92933272
  0.50080000   0.86128127
  0.50080000   0.40652159
  0.50080000   0.65462087
  0.50080000   0.92261106
  0.50080000   0.88381613
  0.50080000   0.41443127
  0.50080000   0.59558024
  0.50080000   0.93478377
  0.50080000   0.89512051
  0.50080000   0.36598145
  0.50080000   0.54839868
  0.50080000   0.87752114
  0.50080000   0.93331878
  0.50080000   0.51407914
  0.50080000   0.46109799
  0.50080000   0.99560419
  0.50080000   0.79489186
  0.50080000   0.18999404
  0.50080000   0.71983013
  0.50080000   0.57774368
  0.50080000   0.94205401
  0.50080000   0.88978641
  0.50080000   0.34389966
  0.50160000   0.61904692
  0.50160000   0.55760152
  0.50160000   1.01605949
  0.50160000   0.82038159
  0.50160000   0.09125867
  0.50160000   0.62049554
  0.50160000   0.39758930
  0.50160000   0.98616997
  0.50160000   0.74120874
  0.50160000   0.24692272
  0.50160000   0.83225130
  0.50160000   0.63658436
  0.50160000   0.74866463
  0.50160000   0.98547673
  0.50160000   0.73651757
  0.50160000   0.25292922
  0.50160000   0.84166446
  0.50160000   0.64265053
  0.50160000   0.72670525
  0.50160000   0.98947553
  0.50160000   0.76216576
  0.50160000   0.22881653
  0.50160000   0.79425738
  0.50160000   0.62384398
  0.50160000   0.82880202
  0.50160000   0.95762484
  0.50160000   0.61596123
  0.50160000   0.38003504
  0.50160000   0.98406985
  0.50160000   0.72516427
  0.50160000   0.26087793
  0.50160000   0.85930038
  0.50160000   0.64584923
  0.50160000   0.68287179
  0.50160000   0.99766277
  0.50160000   0.79908125
  0.50160000   0.18061616
  0.50160000   0.70770644
  0.50160000   0.56336671
  0.50160000   0.95537456
  0.50240000   0.19416953
  0.50240000   0.79200395
  0.50240000   0.56095826
  0.50240000   0.83324987
  0.50240000   0.96166391
  0.50240000   0.60194508
  0.50240000   0.36549173
  0.50240000   0.98292812
  0.50240000   0.70785148
  0.50240000   0.26974307
  0.50240000   0.88280520
  0.50240000   0.64592336
  0.50240000   0.61987322
  0.50240000   1.00512329
  0.50240000   0.82710537
  0.50240000   0.13596542
  0.50240000   0.62810178
  0.50240000   0.48846571
  0.50240000   1.00431727
  0.50240000   0.80370937
  0.50240000   0.14918640
  0.50240000   0.68334972
  0.50240000   0.50704811
  0.50240000   0.97319996
  0.50240000   0.84390959
  0.50240000   0.25615923
  0.50240000   0.64421022
  0.50240000   0.71121762
  0.50240000   0.99153785
  0.50240000   0.77685213
  0.50240000   0.21474578
  0.50240000   0.76384933
  0.50240000   0.61043869
  0.50240000   0.88205647
  0.50240000   0.93042096
  0.50240000   0.50402836
  0.50240000   0.47001950
  0.50240000   0.99304233
  0.50240000   0.80387412
  0.50240000   0.19705819
  0.50320000   0.83949166
  0.50320000   0.28858890
  0.50320000   0.66834637
  0.50320000   0.76201996
  0.50320000   0.96241994
  0.50320000   0.73733532
  0.50320000   0.34294090
  0.50320000   0.87592472
  0.50320000   0.76289790
  0.50320000   0.61390622
  0.50320000   0.88520882
  0.50320000   0.92894689
  0.50320000   0.49727981
  0.50320000   0.47461786
  0.50320000   0.99090357
  0.50320000   0.80960679
  0.50320000   0.20377476
  0.50320000   0.69773448
  0.50320000   0.60981294
  0.50320000   0.96635892
  0.50320000   0.86580986
  0.50320000   0.27103562
  0.50320000   0.59579527
  0.50320000   0.73981693
  0.50320000   0.99975497
  0.50320000   0.73446061
  0.50320000   0.19500141
  0.50320000   0.81892536
  0.50320000   0.55039318
  0.50320000   0.77929116
  0.50320000   0.98502656
  0.50320000   0.68853054
  0.50320000   0.26652177
  0.50320000   0.90075955
  0.50320000   0.62869995
  0.50320000   0.56931457
  0.50320000   1.01379870
  0.50320000   0.82402959
  0.50320000   0.09990084
  0.50320000   0.61704515
  0.50400000   0.65308039
  0.50400000   0.67950158
  0.50400000   0.99479511
  0.50400000   0.80428935
  0.50400000   0.19072847
  0.50400000   0.70251350
  0.50400000   0.58449789
  0.50400000   0.96213864
  0.50400000   0.87277869
  0.50400000   0.28258413
  0.50400000   0.58195079
  0.50400000   0.75890236
  0.50400000   0.99477536
  0.50400000   0.71183882
  0.50400000   0.22185260
  0.50400000   0.85840665
  0.50400000   0.57845654
  0.50400000   0.68848188
  0.50400000   1.01463903
  0.50400000   0.77663931
  0.50400000   0.11722895
  0.50400000   0.71806456
  0.50400000   0.43594503
  0.50400000   0.92597141
  0.50400000   0.83335345
  0.50400000   0.43164463
  0.50400000   0.72946057
  0.50400000   0.93315420
  0.50400000   0.80707697
  0.50400000   0.42181571
  0.50400000   0.78391299
  0.50400000   0.90539029
  0.50400000   0.74636694
  0.50400000   0.53508942
  0.50400000   0.90830186
  0.50400000   0.91109612
  0.50400000   0.44195202
  0.50400000   0.52201507
  0.50400000   0.95850363
  0.50400000   0.86517695
  0.50480000   0.33006313
  0.50480000   0.96386466
  0.50480000   0.67511422
  0.50480000   0.34995724
  0.50480000   0.94330123
  0.50480000   0.72194783
  0.50480000   0.41566225
  0.50480000   0.91763295
  0.50480000   0.82137297
  0.50480000   0.46566277
  0.50480000   0.76419210
  0.50480000   0.95125610
  0.50480000   0.74383910
  0.50480000   0.38278896
  0.50480000   0.88063989
  0.50480000   0.81167599
  0.50480000   0.58172560
  0.50480000   0.79795128
  0.50480000   0.98181569
  0.50480000   0.65890807
  0.50480000   0.28504240
  0.50480000   0.93154209
  0.50480000   0.63643763
  0.50480000   0.47103347
  0.50480000   0.99993433
  0.50480000   0.79817213
  0.50480000   0.17163075
  0.50480000   0.70556450
  0.50480000   0.54748494
  0.50480000   0.95774862
  0.50480000   0.87307781
  0.50480000   0.29870874
  0.50480000   0.58773173
  0.50480000   0.78475881
  0.50480000   0.98506765
  0.50480000   0.67865893
  0.50480000   0.26853395
  0.50480000   0.91029048
  0.50480000   0.62529474
  0.50480000   0.54075002
  0.50560000   0.69888311
  0.50560000   0.53242419
  0.50560000   0.96469243
  0.50560000   0.86408297
  0.50560000   0.27901444
  0.50560000   0.60423030
  0.50560000   0.75364945
  0.50560000   0.99482626
  0.50560000   0.71995726
  0.50560000   0.22036258
  0.50560000   0.84891882
  0.50560000   0.58181701
  0.50560000   0.71294537
  0.50560000   1.00988502
  0.50560000   0.75751441
  0.50560000   0.14546817
  0.50560000   0.76313768
  0.50560000   0.47918786
  0.50560000   0.87433632
  0.50560000   0.90504082
  0.50560000   0.54391046
  0.50560000   0.55732251
  0.50560000   1.02003816
  0.50560000   0.81600780
  0.50560000   0.07673349
  0.50560000   0.62273108
  0.50560000   0.36875755
  0.50560000   0.97797223
  0.50560000   0.71442398
  0.50560000   0.28802944
  0.50560000   0.88343079
  0.50560000   0.67536524
  0.50560000   0.61514906
  0.50560000   0.98727921
  0.50560000   0.84582239
  0.50560000   0.20115161
  0.50560000   0.61616721
  0.50560000   0.61668771
  0.50560000   1.01738958
  0.50560000   0.81405287
  0.50640000   0.14538913
  0.50640000   0.63425181
  0.50640000   0.50854533
  0.50640000   1.00650032
  0.50640000   0.81294682
  0.50640000   0.13707715
  0.50640000   0.65935179
  0.50640000   0.48851026
  0.50640000   0.98972213
  0.50640000   0.81815034
  0.50640000   0.20455439
  0.50640000   0.68051685
  0.50640000   0.61539421
  0.50640000   0.98234282
  0.50640000   0.84942584
  0.50640000   0.21873467
  0.50640000   0.61543873
  0.50640000   0.64925265
  0.50640000   1.01519299
  0.50640000   0.80290935
  0.50640000   0.10420521
  0.50640000   0.66328930
  0.50640000   0.42127095
  0.50640000   0.97280532
  0.50640000   0.77917643
  0.50640000   0.28840093
  0.50640000   0.79176548
  0.50640000   0.72662571
  0.50640000   0.81810245
  0.50640000   0.88459986
  0.50640000   0.69513470
  0.50640000   0.61053019
  0.50640000   0.97184067
  0.50640000   0.86261775
  0.50640000   0.25350447
  0.50640000   0.59776143
  0.50640000   0.71171307
  0.50640000   1.00835120
  0.50640000   0.75995079
  0.50640000   0.15140310
  0.50720000   0.50005507
  0.50720000   1.01683379
  0.50720000   0.79997840
  0.50720000   0.09902307
  0.50720000   0.66677088
  0.50720000   0.41075007
  0.50720000   0.96814137
  0.50720000   0.77300333
  0.50720000   0.30914662
  0.50720000   0.81071857
  0.50720000   0.75069637
  0.50720000   0.77448576
  0.50720000   0.87184870
  0.50720000   0.78642401
  0.50720000   0.61874386
  0.50720000   0.84740473
  0.50720000   0.95205899
  0.50720000   0.57888993
  0.50720000   0.40320086
  0.50720000   0.99834823
  0.50720000   0.73831546
  0.50720000   0.20070664
  0.50720000   0.81716605
  0.50720000   0.56300243
[truncated: 641,057 more chars]
