# Supplementary material for: A Fractional-Order Discrete Noninvertible Map of Cubic Type: Dynamics, Control, and Synchronization
Source: Hindawi journal article supplement (doi:10.1155/2020/2935192), 2020-05-22
Supplement: f1 [file 2935192.f1.zip › 2935192.f1/discretesanweiIN2q98c.dat]

  0.20000000   0.36116015
  0.20000000   0.36116015
  0.20000000   0.36116015
  0.20000000   0.36116015
  0.20000000   0.36116014
  0.20000000   0.36116014
  0.20000000   0.36116014
  0.20000000   0.36116014
  0.20000000   0.36116013
  0.20000000   0.36116013
  0.20000000   0.36116013
  0.20000000   0.36116013
  0.20000000   0.36116012
  0.20000000   0.36116012
  0.20000000   0.36116012
  0.20000000   0.36116011
  0.20000000   0.36116011
  0.20000000   0.36116011
  0.20000000   0.36116011
  0.20000000   0.36116010
  0.20000000   0.36116010
  0.20000000   0.36116010
  0.20000000   0.36116010
  0.20000000   0.36116009
  0.20000000   0.36116009
  0.20000000   0.36116009
  0.20000000   0.36116009
  0.20000000   0.36116008
  0.20000000   0.36116008
  0.20000000   0.36116008
  0.20000000   0.36116008
  0.20000000   0.36116007
  0.20000000   0.36116007
  0.20000000   0.36116007
  0.20000000   0.36116007
  0.20000000   0.36116006
  0.20000000   0.36116006
  0.20000000   0.36116006
  0.20000000   0.36116006
  0.20000000   0.36116005
  0.20100000   0.36220446
  0.20100000   0.36220446
  0.20100000   0.36220446
  0.20100000   0.36220445
  0.20100000   0.36220445
  0.20100000   0.36220445
  0.20100000   0.36220445
  0.20100000   0.36220444
  0.20100000   0.36220444
  0.20100000   0.36220444
  0.20100000   0.36220444
  0.20100000   0.36220443
  0.20100000   0.36220443
  0.20100000   0.36220443
  0.20100000   0.36220443
  0.20100000   0.36220442
  0.20100000   0.36220442
  0.20100000   0.36220442
  0.20100000   0.36220442
  0.20100000   0.36220441
  0.20100000   0.36220441
  0.20100000   0.36220441
  0.20100000   0.36220441
  0.20100000   0.36220440
  0.20100000   0.36220440
  0.20100000   0.36220440
  0.20100000   0.36220440
  0.20100000   0.36220439
  0.20100000   0.36220439
  0.20100000   0.36220439
  0.20100000   0.36220439
  0.20100000   0.36220438
  0.20100000   0.36220438
  0.20100000   0.36220438
  0.20100000   0.36220438
  0.20100000   0.36220437
  0.20100000   0.36220437
  0.20100000   0.36220437
  0.20100000   0.36220437
  0.20100000   0.36220437
  0.20200000   0.36324396
  0.20200000   0.36324396
  0.20200000   0.36324396
  0.20200000   0.36324395
  0.20200000   0.36324395
  0.20200000   0.36324395
  0.20200000   0.36324395
  0.20200000   0.36324394
  0.20200000   0.36324394
  0.20200000   0.36324394
  0.20200000   0.36324394
  0.20200000   0.36324393
  0.20200000   0.36324393
  0.20200000   0.36324393
  0.20200000   0.36324393
  0.20200000   0.36324392
  0.20200000   0.36324392
  0.20200000   0.36324392
  0.20200000   0.36324392
  0.20200000   0.36324392
  0.20200000   0.36324391
  0.20200000   0.36324391
  0.20200000   0.36324391
  0.20200000   0.36324391
  0.20200000   0.36324390
  0.20200000   0.36324390
  0.20200000   0.36324390
  0.20200000   0.36324390
  0.20200000   0.36324389
  0.20200000   0.36324389
  0.20200000   0.36324389
  0.20200000   0.36324389
  0.20200000   0.36324389
  0.20200000   0.36324388
  0.20200000   0.36324388
  0.20200000   0.36324388
  0.20200000   0.36324388
  0.20200000   0.36324387
  0.20200000   0.36324387
  0.20200000   0.36324387
  0.20300000   0.36427870
  0.20300000   0.36427870
  0.20300000   0.36427870
  0.20300000   0.36427869
  0.20300000   0.36427869
  0.20300000   0.36427869
  0.20300000   0.36427869
  0.20300000   0.36427868
  0.20300000   0.36427868
  0.20300000   0.36427868
  0.20300000   0.36427868
  0.20300000   0.36427867
  0.20300000   0.36427867
  0.20300000   0.36427867
  0.20300000   0.36427867
  0.20300000   0.36427867
  0.20300000   0.36427866
  0.20300000   0.36427866
  0.20300000   0.36427866
  0.20300000   0.36427866
  0.20300000   0.36427865
  0.20300000   0.36427865
  0.20300000   0.36427865
  0.20300000   0.36427865
  0.20300000   0.36427865
  0.20300000   0.36427864
  0.20300000   0.36427864
  0.20300000   0.36427864
  0.20300000   0.36427864
  0.20300000   0.36427863
  0.20300000   0.36427863
  0.20300000   0.36427863
  0.20300000   0.36427863
  0.20300000   0.36427863
  0.20300000   0.36427862
  0.20300000   0.36427862
  0.20300000   0.36427862
  0.20300000   0.36427862
  0.20300000   0.36427861
  0.20300000   0.36427861
  0.20400000   0.36530872
  0.20400000   0.36530872
  0.20400000   0.36530872
  0.20400000   0.36530872
  0.20400000   0.36530871
  0.20400000   0.36530871
  0.20400000   0.36530871
  0.20400000   0.36530871
  0.20400000   0.36530871
  0.20400000   0.36530870
  0.20400000   0.36530870
  0.20400000   0.36530870
  0.20400000   0.36530870
  0.20400000   0.36530869
  0.20400000   0.36530869
  0.20400000   0.36530869
  0.20400000   0.36530869
  0.20400000   0.36530869
  0.20400000   0.36530868
  0.20400000   0.36530868
  0.20400000   0.36530868
  0.20400000   0.36530868
  0.20400000   0.36530867
  0.20400000   0.36530867
  0.20400000   0.36530867
  0.20400000   0.36530867
  0.20400000   0.36530867
  0.20400000   0.36530866
  0.20400000   0.36530866
  0.20400000   0.36530866
  0.20400000   0.36530866
  0.20400000   0.36530866
  0.20400000   0.36530865
  0.20400000   0.36530865
  0.20400000   0.36530865
  0.20400000   0.36530865
  0.20400000   0.36530865
  0.20400000   0.36530864
  0.20400000   0.36530864
  0.20400000   0.36530864
  0.20500000   0.36633407
  0.20500000   0.36633407
  0.20500000   0.36633407
  0.20500000   0.36633407
  0.20500000   0.36633407
  0.20500000   0.36633406
  0.20500000   0.36633406
  0.20500000   0.36633406
  0.20500000   0.36633406
  0.20500000   0.36633406
  0.20500000   0.36633405
  0.20500000   0.36633405
  0.20500000   0.36633405
  0.20500000   0.36633405
  0.20500000   0.36633405
  0.20500000   0.36633404
  0.20500000   0.36633404
  0.20500000   0.36633404
  0.20500000   0.36633404
  0.20500000   0.36633404
  0.20500000   0.36633403
  0.20500000   0.36633403
  0.20500000   0.36633403
  0.20500000   0.36633403
  0.20500000   0.36633402
  0.20500000   0.36633402
  0.20500000   0.36633402
  0.20500000   0.36633402
  0.20500000   0.36633402
  0.20500000   0.36633401
  0.20500000   0.36633401
  0.20500000   0.36633401
  0.20500000   0.36633401
  0.20500000   0.36633401
  0.20500000   0.36633400
  0.20500000   0.36633400
  0.20500000   0.36633400
  0.20500000   0.36633400
  0.20500000   0.36633400
  0.20500000   0.36633399
  0.20600000   0.36735480
  0.20600000   0.36735480
  0.20600000   0.36735479
  0.20600000   0.36735479
  0.20600000   0.36735479
  0.20600000   0.36735479
  0.20600000   0.36735479
  0.20600000   0.36735478
  0.20600000   0.36735478
  0.20600000   0.36735478
  0.20600000   0.36735478
  0.20600000   0.36735478
  0.20600000   0.36735477
  0.20600000   0.36735477
  0.20600000   0.36735477
  0.20600000   0.36735477
  0.20600000   0.36735477
  0.20600000   0.36735476
  0.20600000   0.36735476
  0.20600000   0.36735476
  0.20600000   0.36735476
  0.20600000   0.36735476
  0.20600000   0.36735476
  0.20600000   0.36735475
  0.20600000   0.36735475
  0.20600000   0.36735475
  0.20600000   0.36735475
  0.20600000   0.36735475
  0.20600000   0.36735474
  0.20600000   0.36735474
  0.20600000   0.36735474
  0.20600000   0.36735474
  0.20600000   0.36735474
  0.20600000   0.36735473
  0.20600000   0.36735473
  0.20600000   0.36735473
  0.20600000   0.36735473
  0.20600000   0.36735473
  0.20600000   0.36735472
  0.20600000   0.36735472
  0.20700000   0.36837094
  0.20700000   0.36837094
  0.20700000   0.36837093
  0.20700000   0.36837093
  0.20700000   0.36837093
  0.20700000   0.36837093
  0.20700000   0.36837093
  0.20700000   0.36837092
  0.20700000   0.36837092
  0.20700000   0.36837092
  0.20700000   0.36837092
  0.20700000   0.36837092
  0.20700000   0.36837092
  0.20700000   0.36837091
  0.20700000   0.36837091
  0.20700000   0.36837091
  0.20700000   0.36837091
  0.20700000   0.36837091
  0.20700000   0.36837090
  0.20700000   0.36837090
  0.20700000   0.36837090
  0.20700000   0.36837090
  0.20700000   0.36837090
  0.20700000   0.36837089
  0.20700000   0.36837089
  0.20700000   0.36837089
  0.20700000   0.36837089
  0.20700000   0.36837089
  0.20700000   0.36837089
  0.20700000   0.36837088
  0.20700000   0.36837088
  0.20700000   0.36837088
  0.20700000   0.36837088
  0.20700000   0.36837088
  0.20700000   0.36837087
  0.20700000   0.36837087
  0.20700000   0.36837087
  0.20700000   0.36837087
  0.20700000   0.36837087
  0.20700000   0.36837087
  0.20800000   0.36938253
  0.20800000   0.36938253
  0.20800000   0.36938253
  0.20800000   0.36938253
  0.20800000   0.36938253
  0.20800000   0.36938253
  0.20800000   0.36938252
  0.20800000   0.36938252
  0.20800000   0.36938252
  0.20800000   0.36938252
  0.20800000   0.36938252
  0.20800000   0.36938251
  0.20800000   0.36938251
  0.20800000   0.36938251
  0.20800000   0.36938251
  0.20800000   0.36938251
  0.20800000   0.36938251
  0.20800000   0.36938250
  0.20800000   0.36938250
  0.20800000   0.36938250
  0.20800000   0.36938250
  0.20800000   0.36938250
  0.20800000   0.36938250
  0.20800000   0.36938249
  0.20800000   0.36938249
  0.20800000   0.36938249
  0.20800000   0.36938249
  0.20800000   0.36938249
  0.20800000   0.36938249
  0.20800000   0.36938248
  0.20800000   0.36938248
  0.20800000   0.36938248
  0.20800000   0.36938248
  0.20800000   0.36938248
  0.20800000   0.36938247
  0.20800000   0.36938247
  0.20800000   0.36938247
  0.20800000   0.36938247
  0.20800000   0.36938247
  0.20800000   0.36938247
  0.20900000   0.37038963
  0.20900000   0.37038963
  0.20900000   0.37038963
  0.20900000   0.37038963
  0.20900000   0.37038962
  0.20900000   0.37038962
  0.20900000   0.37038962
  0.20900000   0.37038962
  0.20900000   0.37038962
  0.20900000   0.37038962
  0.20900000   0.37038961
  0.20900000   0.37038961
  0.20900000   0.37038961
  0.20900000   0.37038961
  0.20900000   0.37038961
  0.20900000   0.37038961
  0.20900000   0.37038960
  0.20900000   0.37038960
  0.20900000   0.37038960
  0.20900000   0.37038960
  0.20900000   0.37038960
  0.20900000   0.37038960
  0.20900000   0.37038959
  0.20900000   0.37038959
  0.20900000   0.37038959
  0.20900000   0.37038959
  0.20900000   0.37038959
  0.20900000   0.37038959
  0.20900000   0.37038958
  0.20900000   0.37038958
  0.20900000   0.37038958
  0.20900000   0.37038958
  0.20900000   0.37038958
  0.20900000   0.37038958
  0.20900000   0.37038957
  0.20900000   0.37038957
  0.20900000   0.37038957
  0.20900000   0.37038957
  0.20900000   0.37038957
  0.20900000   0.37038957
  0.21000000   0.37139227
  0.21000000   0.37139227
  0.21000000   0.37139226
  0.21000000   0.37139226
  0.21000000   0.37139226
  0.21000000   0.37139226
  0.21000000   0.37139226
  0.21000000   0.37139226
  0.21000000   0.37139225
  0.21000000   0.37139225
  0.21000000   0.37139225
  0.21000000   0.37139225
  0.21000000   0.37139225
  0.21000000   0.37139225
  0.21000000   0.37139225
  0.21000000   0.37139224
  0.21000000   0.37139224
  0.21000000   0.37139224
  0.21000000   0.37139224
  0.21000000   0.37139224
  0.21000000   0.37139224
  0.21000000   0.37139223
  0.21000000   0.37139223
  0.21000000   0.37139223
  0.21000000   0.37139223
  0.21000000   0.37139223
  0.21000000   0.37139223
  0.21000000   0.37139222
  0.21000000   0.37139222
  0.21000000   0.37139222
  0.21000000   0.37139222
  0.21000000   0.37139222
  0.21000000   0.37139222
  0.21000000   0.37139222
  0.21000000   0.37139221
  0.21000000   0.37139221
  0.21000000   0.37139221
  0.21000000   0.37139221
  0.21000000   0.37139221
  0.21000000   0.37139221
  0.21100000   0.37239049
  0.21100000   0.37239048
  0.21100000   0.37239048
  0.21100000   0.37239048
  0.21100000   0.37239048
  0.21100000   0.37239048
  0.21100000   0.37239048
  0.21100000   0.37239047
  0.21100000   0.37239047
  0.21100000   0.37239047
  0.21100000   0.37239047
  0.21100000   0.37239047
  0.21100000   0.37239047
  0.21100000   0.37239047
  0.21100000   0.37239046
  0.21100000   0.37239046
  0.21100000   0.37239046
  0.21100000   0.37239046
  0.21100000   0.37239046
  0.21100000   0.37239046
  0.21100000   0.37239046
  0.21100000   0.37239045
  0.21100000   0.37239045
  0.21100000   0.37239045
  0.21100000   0.37239045
  0.21100000   0.37239045
  0.21100000   0.37239045
  0.21100000   0.37239044
  0.21100000   0.37239044
  0.21100000   0.37239044
  0.21100000   0.37239044
  0.21100000   0.37239044
  0.21100000   0.37239044
  0.21100000   0.37239044
  0.21100000   0.37239043
  0.21100000   0.37239043
  0.21100000   0.37239043
  0.21100000   0.37239043
  0.21100000   0.37239043
  0.21100000   0.37239043
  0.21200000   0.37338432
  0.21200000   0.37338432
  0.21200000   0.37338432
  0.21200000   0.37338432
  0.21200000   0.37338432
  0.21200000   0.37338432
  0.21200000   0.37338432
  0.21200000   0.37338431
  0.21200000   0.37338431
  0.21200000   0.37338431
  0.21200000   0.37338431
  0.21200000   0.37338431
  0.21200000   0.37338431
  0.21200000   0.37338431
  0.21200000   0.37338430
  0.21200000   0.37338430
  0.21200000   0.37338430
  0.21200000   0.37338430
  0.21200000   0.37338430
  0.21200000   0.37338430
  0.21200000   0.37338430
  0.21200000   0.37338429
  0.21200000   0.37338429
  0.21200000   0.37338429
  0.21200000   0.37338429
  0.21200000   0.37338429
  0.21200000   0.37338429
  0.21200000   0.37338429
  0.21200000   0.37338428
  0.21200000   0.37338428
  0.21200000   0.37338428
  0.21200000   0.37338428
  0.21200000   0.37338428
  0.21200000   0.37338428
  0.21200000   0.37338428
  0.21200000   0.37338427
  0.21200000   0.37338427
  0.21200000   0.37338427
  0.21200000   0.37338427
  0.21200000   0.37338427
  0.21300000   0.37437382
  0.21300000   0.37437382
  0.21300000   0.37437382
  0.21300000   0.37437382
  0.21300000   0.37437382
  0.21300000   0.37437382
  0.21300000   0.37437381
  0.21300000   0.37437381
  0.21300000   0.37437381
  0.21300000   0.37437381
  0.21300000   0.37437381
  0.21300000   0.37437381
  0.21300000   0.37437381
  0.21300000   0.37437380
  0.21300000   0.37437380
  0.21300000   0.37437380
  0.21300000   0.37437380
  0.21300000   0.37437380
  0.21300000   0.37437380
  0.21300000   0.37437380
  0.21300000   0.37437380
  0.21300000   0.37437379
  0.21300000   0.37437379
  0.21300000   0.37437379
  0.21300000   0.37437379
  0.21300000   0.37437379
  0.21300000   0.37437379
  0.21300000   0.37437379
  0.21300000   0.37437379
  0.21300000   0.37437378
  0.21300000   0.37437378
  0.21300000   0.37437378
  0.21300000   0.37437378
  0.21300000   0.37437378
  0.21300000   0.37437378
  0.21300000   0.37437378
  0.21300000   0.37437378
  0.21300000   0.37437377
  0.21300000   0.37437377
  0.21300000   0.37437377
  0.21400000   0.37535902
  0.21400000   0.37535902
  0.21400000   0.37535902
  0.21400000   0.37535902
  0.21400000   0.37535901
  0.21400000   0.37535901
  0.21400000   0.37535901
  0.21400000   0.37535901
  0.21400000   0.37535901
  0.21400000   0.37535901
  0.21400000   0.37535901
  0.21400000   0.37535901
  0.21400000   0.37535900
  0.21400000   0.37535900
  0.21400000   0.37535900
  0.21400000   0.37535900
  0.21400000   0.37535900
  0.21400000   0.37535900
  0.21400000   0.37535900
  0.21400000   0.37535900
  0.21400000   0.37535899
  0.21400000   0.37535899
  0.21400000   0.37535899
  0.21400000   0.37535899
  0.21400000   0.37535899
  0.21400000   0.37535899
  0.21400000   0.37535899
  0.21400000   0.37535899
  0.21400000   0.37535898
  0.21400000   0.37535898
  0.21400000   0.37535898
  0.21400000   0.37535898
  0.21400000   0.37535898
  0.21400000   0.37535898
  0.21400000   0.37535898
  0.21400000   0.37535898
  0.21400000   0.37535898
  0.21400000   0.37535897
  0.21400000   0.37535897
  0.21400000   0.37535897
  0.21500000   0.37633995
  0.21500000   0.37633995
  0.21500000   0.37633995
  0.21500000   0.37633995
  0.21500000   0.37633995
  0.21500000   0.37633995
  0.21500000   0.37633995
  0.21500000   0.37633994
  0.21500000   0.37633994
  0.21500000   0.37633994
  0.21500000   0.37633994
  0.21500000   0.37633994
  0.21500000   0.37633994
  0.21500000   0.37633994
  0.21500000   0.37633994
  0.21500000   0.37633994
  0.21500000   0.37633993
  0.21500000   0.37633993
  0.21500000   0.37633993
  0.21500000   0.37633993
  0.21500000   0.37633993
  0.21500000   0.37633993
  0.21500000   0.37633993
  0.21500000   0.37633993
  0.21500000   0.37633993
  0.21500000   0.37633992
  0.21500000   0.37633992
  0.21500000   0.37633992
  0.21500000   0.37633992
  0.21500000   0.37633992
  0.21500000   0.37633992
  0.21500000   0.37633992
  0.21500000   0.37633992
  0.21500000   0.37633992
  0.21500000   0.37633991
  0.21500000   0.37633991
  0.21500000   0.37633991
  0.21500000   0.37633991
  0.21500000   0.37633991
  0.21500000   0.37633991
  0.21600000   0.37731666
  0.21600000   0.37731666
  0.21600000   0.37731666
  0.21600000   0.37731666
  0.21600000   0.37731666
  0.21600000   0.37731666
  0.21600000   0.37731665
  0.21600000   0.37731665
  0.21600000   0.37731665
  0.21600000   0.37731665
  0.21600000   0.37731665
  0.21600000   0.37731665
  0.21600000   0.37731665
  0.21600000   0.37731665
  0.21600000   0.37731665
  0.21600000   0.37731665
  0.21600000   0.37731664
  0.21600000   0.37731664
  0.21600000   0.37731664
  0.21600000   0.37731664
  0.21600000   0.37731664
  0.21600000   0.37731664
  0.21600000   0.37731664
  0.21600000   0.37731664
  0.21600000   0.37731664
  0.21600000   0.37731664
  0.21600000   0.37731663
  0.21600000   0.37731663
  0.21600000   0.37731663
  0.21600000   0.37731663
  0.21600000   0.37731663
  0.21600000   0.37731663
  0.21600000   0.37731663
  0.21600000   0.37731663
  0.21600000   0.37731663
  0.21600000   0.37731662
  0.21600000   0.37731662
  0.21600000   0.37731662
  0.21600000   0.37731662
  0.21600000   0.37731662
  0.21700000   0.37828918
  0.21700000   0.37828918
  0.21700000   0.37828918
  0.21700000   0.37828918
  0.21700000   0.37828918
  0.21700000   0.37828918
  0.21700000   0.37828918
  0.21700000   0.37828917
  0.21700000   0.37828917
  0.21700000   0.37828917
  0.21700000   0.37828917
  0.21700000   0.37828917
  0.21700000   0.37828917
  0.21700000   0.37828917
  0.21700000   0.37828917
  0.21700000   0.37828917
  0.21700000   0.37828917
  0.21700000   0.37828916
  0.21700000   0.37828916
  0.21700000   0.37828916
  0.21700000   0.37828916
  0.21700000   0.37828916
  0.21700000   0.37828916
  0.21700000   0.37828916
  0.21700000   0.37828916
  0.21700000   0.37828916
  0.21700000   0.37828916
  0.21700000   0.37828916
  0.21700000   0.37828915
  0.21700000   0.37828915
  0.21700000   0.37828915
  0.21700000   0.37828915
  0.21700000   0.37828915
  0.21700000   0.37828915
  0.21700000   0.37828915
  0.21700000   0.37828915
  0.21700000   0.37828915
  0.21700000   0.37828915
  0.21700000   0.37828914
  0.21700000   0.37828914
  0.21800000   0.37925755
  0.21800000   0.37925755
  0.21800000   0.37925755
  0.21800000   0.37925755
  0.21800000   0.37925755
  0.21800000   0.37925754
  0.21800000   0.37925754
  0.21800000   0.37925754
  0.21800000   0.37925754
  0.21800000   0.37925754
  0.21800000   0.37925754
  0.21800000   0.37925754
  0.21800000   0.37925754
  0.21800000   0.37925754
  0.21800000   0.37925754
  0.21800000   0.37925754
  0.21800000   0.37925753
  0.21800000   0.37925753
  0.21800000   0.37925753
  0.21800000   0.37925753
  0.21800000   0.37925753
  0.21800000   0.37925753
  0.21800000   0.37925753
  0.21800000   0.37925753
  0.21800000   0.37925753
  0.21800000   0.37925753
  0.21800000   0.37925753
  0.21800000   0.37925753
  0.21800000   0.37925752
  0.21800000   0.37925752
  0.21800000   0.37925752
  0.21800000   0.37925752
  0.21800000   0.37925752
  0.21800000   0.37925752
  0.21800000   0.37925752
  0.21800000   0.37925752
  0.21800000   0.37925752
  0.21800000   0.37925752
  0.21800000   0.37925752
  0.21800000   0.37925751
  0.21900000   0.38022180
  0.21900000   0.38022180
  0.21900000   0.38022180
  0.21900000   0.38022180
  0.21900000   0.38022180
  0.21900000   0.38022180
  0.21900000   0.38022180
  0.21900000   0.38022179
  0.21900000   0.38022179
  0.21900000   0.38022179
  0.21900000   0.38022179
  0.21900000   0.38022179
  0.21900000   0.38022179
  0.21900000   0.38022179
  0.21900000   0.38022179
  0.21900000   0.38022179
  0.21900000   0.38022179
  0.21900000   0.38022179
  0.21900000   0.38022179
  0.21900000   0.38022179
  0.21900000   0.38022178
  0.21900000   0.38022178
  0.21900000   0.38022178
  0.21900000   0.38022178
  0.21900000   0.38022178
  0.21900000   0.38022178
  0.21900000   0.38022178
  0.21900000   0.38022178
  0.21900000   0.38022178
  0.21900000   0.38022178
  0.21900000   0.38022178
  0.21900000   0.38022178
  0.21900000   0.38022177
  0.21900000   0.38022177
  0.21900000   0.38022177
  0.21900000   0.38022177
  0.21900000   0.38022177
  0.21900000   0.38022177
  0.21900000   0.38022177
  0.21900000   0.38022177
  0.22000000   0.38118197
  0.22000000   0.38118197
  0.22000000   0.38118197
  0.22000000   0.38118197
  0.22000000   0.38118197
  0.22000000   0.38118197
  0.22000000   0.38118197
  0.22000000   0.38118197
  0.22000000   0.38118197
  0.22000000   0.38118196
  0.22000000   0.38118196
  0.22000000   0.38118196
  0.22000000   0.38118196
  0.22000000   0.38118196
  0.22000000   0.38118196
  0.22000000   0.38118196
  0.22000000   0.38118196
  0.22000000   0.38118196
  0.22000000   0.38118196
  0.22000000   0.38118196
  0.22000000   0.38118196
  0.22000000   0.38118196
  0.22000000   0.38118196
  0.22000000   0.38118195
  0.22000000   0.38118195
  0.22000000   0.38118195
  0.22000000   0.38118195
  0.22000000   0.38118195
  0.22000000   0.38118195
  0.22000000   0.38118195
  0.22000000   0.38118195
  0.22000000   0.38118195
  0.22000000   0.38118195
  0.22000000   0.38118195
  0.22000000   0.38118195
  0.22000000   0.38118195
  0.22000000   0.38118195
  0.22000000   0.38118194
  0.22000000   0.38118194
  0.22000000   0.38118194
  0.22100000   0.38213810
  0.22100000   0.38213810
  0.22100000   0.38213809
  0.22100000   0.38213809
  0.22100000   0.38213809
  0.22100000   0.38213809
  0.22100000   0.38213809
  0.22100000   0.38213809
  0.22100000   0.38213809
  0.22100000   0.38213809
  0.22100000   0.38213809
  0.22100000   0.38213809
  0.22100000   0.38213809
  0.22100000   0.38213809
  0.22100000   0.38213809
  0.22100000   0.38213809
  0.22100000   0.38213809
  0.22100000   0.38213809
  0.22100000   0.38213808
  0.22100000   0.38213808
  0.22100000   0.38213808
  0.22100000   0.38213808
  0.22100000   0.38213808
  0.22100000   0.38213808
  0.22100000   0.38213808
  0.22100000   0.38213808
  0.22100000   0.38213808
  0.22100000   0.38213808
  0.22100000   0.38213808
  0.22100000   0.38213808
  0.22100000   0.38213808
  0.22100000   0.38213808
  0.22100000   0.38213808
  0.22100000   0.38213808
  0.22100000   0.38213807
  0.22100000   0.38213807
  0.22100000   0.38213807
  0.22100000   0.38213807
  0.22100000   0.38213807
  0.22100000   0.38213807
  0.22200000   0.38309021
  0.22200000   0.38309021
  0.22200000   0.38309021
  0.22200000   0.38309021
  0.22200000   0.38309021
  0.22200000   0.38309021
  0.22200000   0.38309021
  0.22200000   0.38309021
  0.22200000   0.38309021
  0.22200000   0.38309020
  0.22200000   0.38309020
  0.22200000   0.38309020
  0.22200000   0.38309020
  0.22200000   0.38309020
  0.22200000   0.38309020
  0.22200000   0.38309020
  0.22200000   0.38309020
  0.22200000   0.38309020
  0.22200000   0.38309020
  0.22200000   0.38309020
  0.22200000   0.38309020
  0.22200000   0.38309020
  0.22200000   0.38309020
  0.22200000   0.38309020
  0.22200000   0.38309020
  0.22200000   0.38309020
  0.22200000   0.38309020
  0.22200000   0.38309020
  0.22200000   0.38309019
  0.22200000   0.38309019
  0.22200000   0.38309019
  0.22200000   0.38309019
  0.22200000   0.38309019
  0.22200000   0.38309019
  0.22200000   0.38309019
  0.22200000   0.38309019
  0.22200000   0.38309019
  0.22200000   0.38309019
  0.22200000   0.38309019
  0.22200000   0.38309019
  0.22300000   0.38403835
  0.22300000   0.38403835
  0.22300000   0.38403835
  0.22300000   0.38403835
  0.22300000   0.38403834
  0.22300000   0.38403834
  0.22300000   0.38403834
  0.22300000   0.38403834
  0.22300000   0.38403834
  0.22300000   0.38403834
  0.22300000   0.38403834
  0.22300000   0.38403834
  0.22300000   0.38403834
  0.22300000   0.38403834
  0.22300000   0.38403834
  0.22300000   0.38403834
  0.22300000   0.38403834
  0.22300000   0.38403834
  0.22300000   0.38403834
  0.22300000   0.38403834
  0.22300000   0.38403834
  0.22300000   0.38403834
  0.22300000   0.38403834
  0.22300000   0.38403834
  0.22300000   0.38403834
  0.22300000   0.38403833
  0.22300000   0.38403833
  0.22300000   0.38403833
  0.22300000   0.38403833
  0.22300000   0.38403833
  0.22300000   0.38403833
  0.22300000   0.38403833
  0.22300000   0.38403833
  0.22300000   0.38403833
  0.22300000   0.38403833
  0.22300000   0.38403833
  0.22300000   0.38403833
  0.22300000   0.38403833
  0.22300000   0.38403833
  0.22300000   0.38403833
  0.22400000   0.38498254
  0.22400000   0.38498254
  0.22400000   0.38498254
  0.22400000   0.38498254
  0.22400000   0.38498254
  0.22400000   0.38498254
  0.22400000   0.38498254
  0.22400000   0.38498254
  0.22400000   0.38498254
  0.22400000   0.38498254
  0.22400000   0.38498254
  0.22400000   0.38498253
  0.22400000   0.38498253
  0.22400000   0.38498253
  0.22400000   0.38498253
  0.22400000   0.38498253
  0.22400000   0.38498253
  0.22400000   0.38498253
  0.22400000   0.38498253
  0.22400000   0.38498253
  0.22400000   0.38498253
  0.22400000   0.38498253
  0.22400000   0.38498253
  0.22400000   0.38498253
  0.22400000   0.38498253
  0.22400000   0.38498253
  0.22400000   0.38498253
  0.22400000   0.38498253
  0.22400000   0.38498253
  0.22400000   0.38498253
  0.22400000   0.38498253
  0.22400000   0.38498253
  0.22400000   0.38498253
  0.22400000   0.38498253
  0.22400000   0.38498253
  0.22400000   0.38498253
  0.22400000   0.38498252
  0.22400000   0.38498252
  0.22400000   0.38498252
  0.22400000   0.38498252
  0.22500000   0.38592282
  0.22500000   0.38592282
  0.22500000   0.38592282
  0.22500000   0.38592282
  0.22500000   0.38592282
  0.22500000   0.38592282
  0.22500000   0.38592282
  0.22500000   0.38592282
  0.22500000   0.38592282
  0.22500000   0.38592282
  0.22500000   0.38592282
  0.22500000   0.38592282
  0.22500000   0.38592282
  0.22500000   0.38592282
  0.22500000   0.38592282
  0.22500000   0.38592282
  0.22500000   0.38592282
  0.22500000   0.38592282
  0.22500000   0.38592282
  0.22500000   0.38592281
  0.22500000   0.38592281
  0.22500000   0.38592281
  0.22500000   0.38592281
  0.22500000   0.38592281
  0.22500000   0.38592281
  0.22500000   0.38592281
  0.22500000   0.38592281
  0.22500000   0.38592281
  0.22500000   0.38592281
  0.22500000   0.38592281
  0.22500000   0.38592281
  0.22500000   0.38592281
  0.22500000   0.38592281
  0.22500000   0.38592281
  0.22500000   0.38592281
  0.22500000   0.38592281
  0.22500000   0.38592281
  0.22500000   0.38592281
  0.22500000   0.38592281
  0.22500000   0.38592281
  0.22600000   0.38685922
  0.22600000   0.38685922
  0.22600000   0.38685922
  0.22600000   0.38685922
  0.22600000   0.38685922
  0.22600000   0.38685922
  0.22600000   0.38685922
  0.22600000   0.38685922
  0.22600000   0.38685922
  0.22600000   0.38685922
  0.22600000   0.38685922
  0.22600000   0.38685922
  0.22600000   0.38685922
  0.22600000   0.38685922
  0.22600000   0.38685922
  0.22600000   0.38685922
  0.22600000   0.38685922
  0.22600000   0.38685922
  0.22600000   0.38685922
  0.22600000   0.38685922
  0.22600000   0.38685922
  0.22600000   0.38685922
  0.22600000   0.38685922
  0.22600000   0.38685922
  0.22600000   0.38685922
  0.22600000   0.38685922
  0.22600000   0.38685922
  0.22600000   0.38685922
  0.22600000   0.38685922
  0.22600000   0.38685922
  0.22600000   0.38685922
  0.22600000   0.38685922
  0.22600000   0.38685922
  0.22600000   0.38685922
  0.22600000   0.38685922
  0.22600000   0.38685922
  0.22600000   0.38685922
  0.22600000   0.38685922
  0.22600000   0.38685922
  0.22600000   0.38685922
  0.22700000   0.38779178
  0.22700000   0.38779178
  0.22700000   0.38779178
  0.22700000   0.38779178
  0.22700000   0.38779178
  0.22700000   0.38779178
  0.22700000   0.38779178
  0.22700000   0.38779178
  0.22700000   0.38779178
  0.22700000   0.38779178
  0.22700000   0.38779178
  0.22700000   0.38779178
  0.22700000   0.38779178
  0.22700000   0.38779178
  0.22700000   0.38779178
  0.22700000   0.38779178
  0.22700000   0.38779178
  0.22700000   0.38779178
  0.22700000   0.38779178
  0.22700000   0.38779178
  0.22700000   0.38779178
  0.22700000   0.38779178
  0.22700000   0.38779178
  0.22700000   0.38779178
  0.22700000   0.38779178
  0.22700000   0.38779178
  0.22700000   0.38779178
  0.22700000   0.38779178
  0.22700000   0.38779178
  0.22700000   0.38779178
  0.22700000   0.38779178
  0.22700000   0.38779178
  0.22700000   0.38779178
  0.22700000   0.38779178
  0.22700000   0.38779178
  0.22700000   0.38779178
  0.22700000   0.38779178
  0.22700000   0.38779178
  0.22700000   0.38779178
  0.22700000   0.38779178
  0.22800000   0.38872053
  0.22800000   0.38872053
  0.22800000   0.38872053
  0.22800000   0.38872053
  0.22800000   0.38872053
  0.22800000   0.38872053
  0.22800000   0.38872053
  0.22800000   0.38872053
  0.22800000   0.38872052
  0.22800000   0.38872052
  0.22800000   0.38872052
  0.22800000   0.38872052
  0.22800000   0.38872052
  0.22800000   0.38872052
  0.22800000   0.38872052
  0.22800000   0.38872052
  0.22800000   0.38872052
  0.22800000   0.38872052
  0.22800000   0.38872052
  0.22800000   0.38872052
  0.22800000   0.38872052
  0.22800000   0.38872052
  0.22800000   0.38872052
  0.22800000   0.38872052
  0.22800000   0.38872052
  0.22800000   0.38872052
  0.22800000   0.38872052
  0.22800000   0.38872052
  0.22800000   0.38872052
  0.22800000   0.38872052
  0.22800000   0.38872052
  0.22800000   0.38872052
  0.22800000   0.38872052
  0.22800000   0.38872052
  0.22800000   0.38872052
  0.22800000   0.38872052
  0.22800000   0.38872052
  0.22800000   0.38872052
  0.22800000   0.38872052
  0.22800000   0.38872052
  0.22900000   0.38964549
  0.22900000   0.38964549
  0.22900000   0.38964549
  0.22900000   0.38964549
  0.22900000   0.38964549
  0.22900000   0.38964549
  0.22900000   0.38964549
  0.22900000   0.38964549
  0.22900000   0.38964549
  0.22900000   0.38964549
  0.22900000   0.38964549
  0.22900000   0.38964549
  0.22900000   0.38964549
  0.22900000   0.38964549
  0.22900000   0.38964549
  0.22900000   0.38964549
  0.22900000   0.38964549
  0.22900000   0.38964549
  0.22900000   0.38964549
  0.22900000   0.38964549
  0.22900000   0.38964549
  0.22900000   0.38964549
  0.22900000   0.38964549
  0.22900000   0.38964549
  0.22900000   0.38964549
  0.22900000   0.38964549
  0.22900000   0.38964549
  0.22900000   0.38964549
  0.22900000   0.38964549
  0.22900000   0.38964549
  0.22900000   0.38964549
  0.22900000   0.38964549
  0.22900000   0.38964549
  0.22900000   0.38964548
  0.22900000   0.38964548
  0.22900000   0.38964548
  0.22900000   0.38964548
  0.22900000   0.38964548
  0.22900000   0.38964548
  0.22900000   0.38964548
  0.23000000   0.39056669
  0.23000000   0.39056669
  0.23000000   0.39056669
  0.23000000   0.39056669
  0.23000000   0.39056669
  0.23000000   0.39056669
  0.23000000   0.39056669
  0.23000000   0.39056669
  0.23000000   0.39056669
  0.23000000   0.39056669
  0.23000000   0.39056669
  0.23000000   0.39056669
  0.23000000   0.39056669
  0.23000000   0.39056669
  0.23000000   0.39056669
  0.23000000   0.39056669
  0.23000000   0.39056669
  0.23000000   0.39056669
  0.23000000   0.39056669
  0.23000000   0.39056669
  0.23000000   0.39056669
  0.23000000   0.39056669
  0.23000000   0.39056669
  0.23000000   0.39056669
  0.23000000   0.39056669
  0.23000000   0.39056669
  0.23000000   0.39056670
  0.23000000   0.39056670
  0.23000000   0.39056670
  0.23000000   0.39056670
  0.23000000   0.39056670
  0.23000000   0.39056670
  0.23000000   0.39056670
  0.23000000   0.39056670
  0.23000000   0.39056670
  0.23000000   0.39056670
  0.23000000   0.39056670
  0.23000000   0.39056670
  0.23000000   0.39056670
  0.23000000   0.39056670
  0.23100000   0.39148418
  0.23100000   0.39148418
  0.23100000   0.39148418
  0.23100000   0.39148418
  0.23100000   0.39148418
  0.23100000   0.39148418
  0.23100000   0.39148418
  0.23100000   0.39148418
  0.23100000   0.39148418
  0.23100000   0.39148418
  0.23100000   0.39148418
  0.23100000   0.39148418
  0.23100000   0.39148418
  0.23100000   0.39148418
  0.23100000   0.39148418
  0.23100000   0.39148418
  0.23100000   0.39148418
  0.23100000   0.39148418
  0.23100000   0.39148418
  0.23100000   0.39148418
  0.23100000   0.39148418
  0.23100000   0.39148418
  0.23100000   0.39148418
  0.23100000   0.39148418
  0.23100000   0.39148418
  0.23100000   0.39148418
  0.23100000   0.39148418
  0.23100000   0.39148418
  0.23100000   0.39148418
  0.23100000   0.39148418
  0.23100000   0.39148418
  0.23100000   0.39148418
  0.23100000   0.39148418
  0.23100000   0.39148418
  0.23100000   0.39148418
  0.23100000   0.39148418
  0.23100000   0.39148418
  0.23100000   0.39148418
  0.23100000   0.39148418
  0.23100000   0.39148418
  0.23200000   0.39239797
  0.23200000   0.39239797
  0.23200000   0.39239797
  0.23200000   0.39239798
  0.23200000   0.39239798
  0.23200000   0.39239798
  0.23200000   0.39239798
  0.23200000   0.39239798
  0.23200000   0.39239798
  0.23200000   0.39239798
  0.23200000   0.39239798
  0.23200000   0.39239798
  0.23200000   0.39239798
  0.23200000   0.39239798
  0.23200000   0.39239798
  0.23200000   0.39239798
  0.23200000   0.39239798
  0.23200000   0.39239798
  0.23200000   0.39239798
  0.23200000   0.39239798
  0.23200000   0.39239798
  0.23200000   0.39239798
  0.23200000   0.39239798
  0.23200000   0.39239798
  0.23200000   0.39239798
  0.23200000   0.39239798
  0.23200000   0.39239798
  0.23200000   0.39239798
  0.23200000   0.39239798
  0.23200000   0.39239798
  0.23200000   0.39239798
  0.23200000   0.39239798
  0.23200000   0.39239798
  0.23200000   0.39239798
  0.23200000   0.39239798
  0.23200000   0.39239798
  0.23200000   0.39239798
  0.23200000   0.39239798
  0.23200000   0.39239798
  0.23200000   0.39239798
  0.23300000   0.39330811
  0.23300000   0.39330811
  0.23300000   0.39330811
  0.23300000   0.39330811
  0.23300000   0.39330811
  0.23300000   0.39330811
  0.23300000   0.39330811
  0.23300000   0.39330811
  0.23300000   0.39330811
  0.23300000   0.39330811
  0.23300000   0.39330811
  0.23300000   0.39330811
  0.23300000   0.39330811
  0.23300000   0.39330811
  0.23300000   0.39330811
  0.23300000   0.39330811
  0.23300000   0.39330811
  0.23300000   0.39330811
  0.23300000   0.39330811
  0.23300000   0.39330811
  0.23300000   0.39330811
  0.23300000   0.39330811
  0.23300000   0.39330811
  0.23300000   0.39330811
  0.23300000   0.39330811
  0.23300000   0.39330811
  0.23300000   0.39330811
  0.23300000   0.39330811
  0.23300000   0.39330811
  0.23300000   0.39330811
  0.23300000   0.39330811
  0.23300000   0.39330811
  0.23300000   0.39330811
  0.23300000   0.39330812
  0.23300000   0.39330812
  0.23300000   0.39330812
  0.23300000   0.39330812
  0.23300000   0.39330812
  0.23300000   0.39330812
  0.23300000   0.39330812
  0.23400000   0.39421461
  0.23400000   0.39421461
  0.23400000   0.39421461
  0.23400000   0.39421461
  0.23400000   0.39421461
  0.23400000   0.39421461
  0.23400000   0.39421461
  0.23400000   0.39421461
  0.23400000   0.39421461
  0.23400000   0.39421461
  0.23400000   0.39421461
  0.23400000   0.39421461
  0.23400000   0.39421461
  0.23400000   0.39421461
  0.23400000   0.39421461
  0.23400000   0.39421461
  0.23400000   0.39421461
  0.23400000   0.39421461
  0.23400000   0.39421461
  0.23400000   0.39421461
  0.23400000   0.39421461
  0.23400000   0.39421461
  0.23400000   0.39421461
  0.23400000   0.39421461
  0.23400000   0.39421461
  0.23400000   0.39421461
  0.23400000   0.39421461
  0.23400000   0.39421461
  0.23400000   0.39421462
  0.23400000   0.39421462
  0.23400000   0.39421462
  0.23400000   0.39421462
  0.23400000   0.39421462
  0.23400000   0.39421462
  0.23400000   0.39421462
  0.23400000   0.39421462
  0.23400000   0.39421462
  0.23400000   0.39421462
  0.23400000   0.39421462
  0.23400000   0.39421462
  0.23500000   0.39511750
  0.23500000   0.39511750
  0.23500000   0.39511750
  0.23500000   0.39511750
  0.23500000   0.39511750
  0.23500000   0.39511750
  0.23500000   0.39511750
  0.23500000   0.39511750
  0.23500000   0.39511750
  0.23500000   0.39511751
  0.23500000   0.39511751
  0.23500000   0.39511751
  0.23500000   0.39511751
  0.23500000   0.39511751
  0.23500000   0.39511751
  0.23500000   0.39511751
  0.23500000   0.39511751
  0.23500000   0.39511751
  0.23500000   0.39511751
  0.23500000   0.39511751
  0.23500000   0.39511751
  0.23500000   0.39511751
  0.23500000   0.39511751
  0.23500000   0.39511751
  0.23500000   0.39511751
  0.23500000   0.39511751
  0.23500000   0.39511751
  0.23500000   0.39511751
  0.23500000   0.39511751
  0.23500000   0.39511751
  0.23500000   0.39511751
  0.23500000   0.39511751
  0.23500000   0.39511751
  0.23500000   0.39511751
  0.23500000   0.39511751
  0.23500000   0.39511752
  0.23500000   0.39511752
  0.23500000   0.39511752
  0.23500000   0.39511752
  0.23500000   0.39511752
  0.23600000   0.39601682
  0.23600000   0.39601682
  0.23600000   0.39601682
  0.23600000   0.39601682
  0.23600000   0.39601682
  0.23600000   0.39601682
  0.23600000   0.39601682
  0.23600000   0.39601682
  0.23600000   0.39601683
  0.23600000   0.39601683
  0.23600000   0.39601683
  0.23600000   0.39601683
  0.23600000   0.39601683
  0.23600000   0.39601683
  0.23600000   0.39601683
  0.23600000   0.39601683
  0.23600000   0.39601683
  0.23600000   0.39601683
  0.23600000   0.39601683
  0.23600000   0.39601683
  0.23600000   0.39601683
  0.23600000   0.39601683
  0.23600000   0.39601683
  0.23600000   0.39601683
  0.23600000   0.39601683
  0.23600000   0.39601683
  0.23600000   0.39601683
  0.23600000   0.39601683
  0.23600000   0.39601683
  0.23600000   0.39601683
  0.23600000   0.39601684
  0.23600000   0.39601684
  0.23600000   0.39601684
  0.23600000   0.39601684
  0.23600000   0.39601684
  0.23600000   0.39601684
  0.23600000   0.39601684
  0.23600000   0.39601684
  0.23600000   0.39601684
  0.23600000   0.39601684
  0.23700000   0.39691259
  0.23700000   0.39691259
  0.23700000   0.39691260
  0.23700000   0.39691260
  0.23700000   0.39691260
  0.23700000   0.39691260
  0.23700000   0.39691260
  0.23700000   0.39691260
  0.23700000   0.39691260
  0.23700000   0.39691260
  0.23700000   0.39691260
  0.23700000   0.39691260
  0.23700000   0.39691260
  0.23700000   0.39691260
  0.23700000   0.39691260
  0.23700000   0.39691260
  0.23700000   0.39691260
  0.23700000   0.39691260
  0.23700000   0.39691260
  0.23700000   0.39691260
  0.23700000   0.39691260
  0.23700000   0.39691261
  0.23700000   0.39691261
  0.23700000   0.39691261
  0.23700000   0.39691261
  0.23700000   0.39691261
  0.23700000   0.39691261
  0.23700000   0.39691261
  0.23700000   0.39691261
  0.23700000   0.39691261
  0.23700000   0.39691261
  0.23700000   0.39691261
  0.23700000   0.39691261
  0.23700000   0.39691261
  0.23700000   0.39691261
  0.23700000   0.39691261
  0.23700000   0.39691261
  0.23700000   0.39691261
  0.23700000   0.39691261
  0.23700000   0.39691261
  0.23800000   0.39780485
  0.23800000   0.39780485
  0.23800000   0.39780485
  0.23800000   0.39780485
  0.23800000   0.39780485
  0.23800000   0.39780485
  0.23800000   0.39780485
  0.23800000   0.39780485
  0.23800000   0.39780485
  0.23800000   0.39780485
  0.23800000   0.39780485
  0.23800000   0.39780485
  0.23800000   0.39780485
  0.23800000   0.39780485
  0.23800000   0.39780486
  0.23800000   0.39780486
  0.23800000   0.39780486
  0.23800000   0.39780486
  0.23800000   0.39780486
  0.23800000   0.39780486
  0.23800000   0.39780486
  0.23800000   0.39780486
  0.23800000   0.39780486
  0.23800000   0.39780486
  0.23800000   0.39780486
  0.23800000   0.39780486
  0.23800000   0.39780486
  0.23800000   0.39780486
  0.23800000   0.39780486
  0.23800000   0.39780486
  0.23800000   0.39780486
  0.23800000   0.39780487
  0.23800000   0.39780487
  0.23800000   0.39780487
  0.23800000   0.39780487
  0.23800000   0.39780487
  0.23800000   0.39780487
  0.23800000   0.39780487
  0.23800000   0.39780487
  0.23800000   0.39780487
  0.23900000   0.39869361
  0.23900000   0.39869361
  0.23900000   0.39869361
  0.23900000   0.39869361
  0.23900000   0.39869361
  0.23900000   0.39869361
  0.23900000   0.39869361
  0.23900000   0.39869361
  0.23900000   0.39869361
  0.23900000   0.39869361
  0.23900000   0.39869361
  0.23900000   0.39869362
  0.23900000   0.39869362
  0.23900000   0.39869362
  0.23900000   0.39869362
  0.23900000   0.39869362
  0.23900000   0.39869362
  0.23900000   0.39869362
  0.23900000   0.39869362
  0.23900000   0.39869362
  0.23900000   0.39869362
  0.23900000   0.39869362
  0.23900000   0.39869362
  0.23900000   0.39869362
  0.23900000   0.39869362
  0.23900000   0.39869362
  0.23900000   0.39869362
  0.23900000   0.39869363
  0.23900000   0.39869363
  0.23900000   0.39869363
  0.23900000   0.39869363
  0.23900000   0.39869363
  0.23900000   0.39869363
  0.23900000   0.39869363
  0.23900000   0.39869363
  0.23900000   0.39869363
  0.23900000   0.39869363
  0.23900000   0.39869363
  0.23900000   0.39869363
  0.23900000   0.39869363
  0.24000000   0.39957890
  0.24000000   0.39957890
  0.24000000   0.39957890
  0.24000000   0.39957891
  0.24000000   0.39957891
  0.24000000   0.39957891
  0.24000000   0.39957891
  0.24000000   0.39957891
  0.24000000   0.39957891
  0.24000000   0.39957891
  0.24000000   0.39957891
  0.24000000   0.39957891
  0.24000000   0.39957891
  0.24000000   0.39957891
  0.24000000   0.39957891
  0.24000000   0.39957891
  0.24000000   0.39957891
  0.24000000   0.39957892
  0.24000000   0.39957892
  0.24000000   0.39957892
  0.24000000   0.39957892
  0.24000000   0.39957892
  0.24000000   0.39957892
  0.24000000   0.39957892
  0.24000000   0.39957892
  0.24000000   0.39957892
  0.24000000   0.39957892
  0.24000000   0.39957892
  0.24000000   0.39957892
  0.24000000   0.39957892
  0.24000000   0.39957892
  0.24000000   0.39957893
  0.24000000   0.39957893
  0.24000000   0.39957893
  0.24000000   0.39957893
  0.24000000   0.39957893
  0.24000000   0.39957893
  0.24000000   0.39957893
  0.24000000   0.39957893
  0.24000000   0.39957893
  0.24100000   0.40046076
  0.24100000   0.40046076
  0.24100000   0.40046076
  0.24100000   0.40046076
  0.24100000   0.40046076
  0.24100000   0.40046076
  0.24100000   0.40046077
  0.24100000   0.40046077
  0.24100000   0.40046077
  0.24100000   0.40046077
  0.24100000   0.40046077
  0.24100000   0.40046077
  0.24100000   0.40046077
  0.24100000   0.40046077
  0.24100000   0.40046077
  0.24100000   0.40046077
  0.24100000   0.40046077
  0.24100000   0.40046077
  0.24100000   0.40046077
  0.24100000   0.40046078
  0.24100000   0.40046078
  0.24100000   0.40046078
  0.24100000   0.40046078
  0.24100000   0.40046078
  0.24100000   0.40046078
  0.24100000   0.40046078
  0.24100000   0.40046078
  0.24100000   0.40046078
  0.24100000   0.40046078
  0.24100000   0.40046078
  0.24100000   0.40046078
  0.24100000   0.40046078
  0.24100000   0.40046078
  0.24100000   0.40046079
  0.24100000   0.40046079
  0.24100000   0.40046079
  0.24100000   0.40046079
  0.24100000   0.40046079
  0.24100000   0.40046079
  0.24100000   0.40046079
  0.24200000   0.40133921
  0.24200000   0.40133921
  0.24200000   0.40133921
  0.24200000   0.40133921
  0.24200000   0.40133921
  0.24200000   0.40133921
  0.24200000   0.40133921
  0.24200000   0.40133921
  0.24200000   0.40133921
  0.24200000   0.40133921
  0.24200000   0.40133921
  0.24200000   0.40133921
  0.24200000   0.40133922
  0.24200000   0.40133922
  0.24200000   0.40133922
  0.24200000   0.40133922
  0.24200000   0.40133922
  0.24200000   0.40133922
  0.24200000   0.40133922
  0.24200000   0.40133922
  0.24200000   0.40133922
  0.24200000   0.40133922
  0.24200000   0.40133922
  0.24200000   0.40133922
  0.24200000   0.40133923
  0.24200000   0.40133923
  0.24200000   0.40133923
  0.24200000   0.40133923
  0.24200000   0.40133923
  0.24200000   0.40133923
  0.24200000   0.40133923
  0.24200000   0.40133923
  0.24200000   0.40133923
  0.24200000   0.40133923
  0.24200000   0.40133923
  0.24200000   0.40133923
  0.24200000   0.40133924
  0.24200000   0.40133924
  0.24200000   0.40133924
  0.24200000   0.40133924
  0.24300000   0.40221426
  0.24300000   0.40221427
  0.24300000   0.40221427
  0.24300000   0.40221427
  0.24300000   0.40221427
  0.24300000   0.40221427
  0.24300000   0.40221427
  0.24300000   0.40221427
  0.24300000   0.40221427
  0.24300000   0.40221427
  0.24300000   0.40221427
  0.24300000   0.40221427
  0.24300000   0.40221428
  0.24300000   0.40221428
  0.24300000   0.40221428
  0.24300000   0.40221428
  0.24300000   0.40221428
  0.24300000   0.40221428
  0.24300000   0.40221428
  0.24300000   0.40221428
  0.24300000   0.40221428
  0.24300000   0.40221428
  0.24300000   0.40221428
  0.24300000   0.40221429
  0.24300000   0.40221429
  0.24300000   0.40221429
  0.24300000   0.40221429
  0.24300000   0.40221429
  0.24300000   0.40221429
  0.24300000   0.40221429
  0.24300000   0.40221429
  0.24300000   0.40221429
  0.24300000   0.40221429
  0.24300000   0.40221429
  0.24300000   0.40221429
  0.24300000   0.40221430
  0.24300000   0.40221430
  0.24300000   0.40221430
  0.24300000   0.40221430
  0.24300000   0.40221430
  0.24400000   0.40308596
  0.24400000   0.40308596
  0.24400000   0.40308597
  0.24400000   0.40308597
  0.24400000   0.40308597
  0.24400000   0.40308597
  0.24400000   0.40308597
  0.24400000   0.40308597
  0.24400000   0.40308597
  0.24400000   0.40308597
  0.24400000   0.40308597
  0.24400000   0.40308597
  0.24400000   0.40308597
  0.24400000   0.40308598
  0.24400000   0.40308598
  0.24400000   0.40308598
  0.24400000   0.40308598
  0.24400000   0.40308598
  0.24400000   0.40308598
  0.24400000   0.40308598
  0.24400000   0.40308598
  0.24400000   0.40308598
  0.24400000   0.40308598
  0.24400000   0.40308599
  0.24400000   0.40308599
  0.24400000   0.40308599
  0.24400000   0.40308599
  0.24400000   0.40308599
  0.24400000   0.40308599
  0.24400000   0.40308599
  0.24400000   0.40308599
  0.24400000   0.40308599
  0.24400000   0.40308599
  0.24400000   0.40308599
  0.24400000   0.40308600
  0.24400000   0.40308600
  0.24400000   0.40308600
  0.24400000   0.40308600
  0.24400000   0.40308600
  0.24400000   0.40308600
  0.24500000   0.40395433
  0.24500000   0.40395433
  0.24500000   0.40395433
  0.24500000   0.40395433
  0.24500000   0.40395433
  0.24500000   0.40395433
  0.24500000   0.40395433
  0.24500000   0.40395433
  0.24500000   0.40395434
  0.24500000   0.40395434
  0.24500000   0.40395434
  0.24500000   0.40395434
  0.24500000   0.40395434
  0.24500000   0.40395434
  0.24500000   0.40395434
  0.24500000   0.40395434
  0.24500000   0.40395434
  0.24500000   0.40395434
  0.24500000   0.40395435
  0.24500000   0.40395435
  0.24500000   0.40395435
  0.24500000   0.40395435
  0.24500000   0.40395435
  0.24500000   0.40395435
  0.24500000   0.40395435
  0.24500000   0.40395435
  0.24500000   0.40395435
  0.24500000   0.40395435
  0.24500000   0.40395436
  0.24500000   0.40395436
  0.24500000   0.40395436
  0.24500000   0.40395436
  0.24500000   0.40395436
  0.24500000   0.40395436
  0.24500000   0.40395436
  0.24500000   0.40395436
  0.24500000   0.40395436
  0.24500000   0.40395436
  0.24500000   0.40395437
  0.24500000   0.40395437
  0.24600000   0.40481938
  0.24600000   0.40481938
  0.24600000   0.40481938
  0.24600000   0.40481938
  0.24600000   0.40481939
  0.24600000   0.40481939
  0.24600000   0.40481939
  0.24600000   0.40481939
  0.24600000   0.40481939
  0.24600000   0.40481939
  0.24600000   0.40481939
  0.24600000   0.40481939
  0.24600000   0.40481939
  0.24600000   0.40481940
  0.24600000   0.40481940
  0.24600000   0.40481940
  0.24600000   0.40481940
  0.24600000   0.40481940
  0.24600000   0.40481940
  0.24600000   0.40481940
  0.24600000   0.40481940
  0.24600000   0.40481940
  0.24600000   0.40481940
  0.24600000   0.40481941
  0.24600000   0.40481941
  0.24600000   0.40481941
  0.24600000   0.40481941
  0.24600000   0.40481941
  0.24600000   0.40481941
  0.24600000   0.40481941
  0.24600000   0.40481941
  0.24600000   0.40481941
  0.24600000   0.40481942
  0.24600000   0.40481942
  0.24600000   0.40481942
  0.24600000   0.40481942
  0.24600000   0.40481942
  0.24600000   0.40481942
  0.24600000   0.40481942
  0.24600000   0.40481942
  0.24700000   0.40568115
  0.24700000   0.40568115
  0.24700000   0.40568115
  0.24700000   0.40568115
  0.24700000   0.40568116
  0.24700000   0.40568116
  0.24700000   0.40568116
  0.24700000   0.40568116
  0.24700000   0.40568116
  0.24700000   0.40568116
  0.24700000   0.40568116
  0.24700000   0.40568116
  0.24700000   0.40568116
  0.24700000   0.40568117
  0.24700000   0.40568117
  0.24700000   0.40568117
  0.24700000   0.40568117
  0.24700000   0.40568117
  0.24700000   0.40568117
  0.24700000   0.40568117
  0.24700000   0.40568117
  0.24700000   0.40568117
  0.24700000   0.40568118
  0.24700000   0.40568118
  0.24700000   0.40568118
  0.24700000   0.40568118
  0.24700000   0.40568118
  0.24700000   0.40568118
  0.24700000   0.40568118
  0.24700000   0.40568118
  0.24700000   0.40568118
  0.24700000   0.40568119
  0.24700000   0.40568119
  0.24700000   0.40568119
  0.24700000   0.40568119
  0.24700000   0.40568119
  0.24700000   0.40568119
  0.24700000   0.40568119
  0.24700000   0.40568119
  0.24700000   0.40568119
  0.24800000   0.40653966
  0.24800000   0.40653966
  0.24800000   0.40653966
  0.24800000   0.40653966
  0.24800000   0.40653966
  0.24800000   0.40653967
  0.24800000   0.40653967
  0.24800000   0.40653967
  0.24800000   0.40653967
  0.24800000   0.40653967
  0.24800000   0.40653967
  0.24800000   0.40653967
  0.24800000   0.40653967
  0.24800000   0.40653967
  0.24800000   0.40653968
  0.24800000   0.40653968
  0.24800000   0.40653968
  0.24800000   0.40653968
  0.24800000   0.40653968
  0.24800000   0.40653968
  0.24800000   0.40653968
  0.24800000   0.40653968
  0.24800000   0.40653969
  0.24800000   0.40653969
  0.24800000   0.40653969
  0.24800000   0.40653969
  0.24800000   0.40653969
  0.24800000   0.40653969
  0.24800000   0.40653969
  0.24800000   0.40653969
  0.24800000   0.40653969
  0.24800000   0.40653970
  0.24800000   0.40653970
  0.24800000   0.40653970
  0.24800000   0.40653970
  0.24800000   0.40653970
  0.24800000   0.40653970
  0.24800000   0.40653970
  0.24800000   0.40653970
  0.24800000   0.40653970
  0.24900000   0.40739493
  0.24900000   0.40739493
  0.24900000   0.40739493
  0.24900000   0.40739494
  0.24900000   0.40739494
  0.24900000   0.40739494
  0.24900000   0.40739494
  0.24900000   0.40739494
  0.24900000   0.40739494
  0.24900000   0.40739494
  0.24900000   0.40739494
  0.24900000   0.40739495
  0.24900000   0.40739495
  0.24900000   0.40739495
  0.24900000   0.40739495
  0.24900000   0.40739495
  0.24900000   0.40739495
  0.24900000   0.40739495
  0.24900000   0.40739495
  0.24900000   0.40739496
  0.24900000   0.40739496
  0.24900000   0.40739496
  0.24900000   0.40739496
  0.24900000   0.40739496
  0.24900000   0.40739496
  0.24900000   0.40739496
  0.24900000   0.40739496
  0.24900000   0.40739496
  0.24900000   0.40739497
  0.24900000   0.40739497
  0.24900000   0.40739497
  0.24900000   0.40739497
  0.24900000   0.40739497
  0.24900000   0.40739497
  0.24900000   0.40739497
  0.24900000   0.40739497
  0.24900000   0.40739498
  0.24900000   0.40739498
  0.24900000   0.40739498
  0.24900000   0.40739498
  0.25000000   0.40824699
  0.25000000   0.40824699
  0.25000000   0.40824699
  0.25000000   0.40824700
  0.25000000   0.40824700
  0.25000000   0.40824700
  0.25000000   0.40824700
  0.25000000   0.40824700
  0.25000000   0.40824700
  0.25000000   0.40824700
  0.25000000   0.40824700
  0.25000000   0.40824701
  0.25000000   0.40824701
  0.25000000   0.40824701
  0.25000000   0.40824701
  0.25000000   0.40824701
  0.25000000   0.40824701
  0.25000000   0.40824701
  0.25000000   0.40824701
  0.25000000   0.40824702
  0.25000000   0.40824702
  0.25000000   0.40824702
  0.25000000   0.40824702
  0.25000000   0.40824702
  0.25000000   0.40824702
  0.25000000   0.40824702
  0.25000000   0.40824702
  0.25000000   0.40824703
  0.25000000   0.40824703
  0.25000000   0.40824703
  0.25000000   0.40824703
  0.25000000   0.40824703
  0.25000000   0.40824703
  0.25000000   0.40824703
  0.25000000   0.40824703
  0.25000000   0.40824704
  0.25000000   0.40824704
  0.25000000   0.40824704
  0.25000000   0.40824704
  0.25000000   0.40824704
  0.25100000   0.40909586
  0.25100000   0.40909586
  0.25100000   0.40909587
  0.25100000   0.40909587
  0.25100000   0.40909587
  0.25100000   0.40909587
  0.25100000   0.40909587
  0.25100000   0.40909587
  0.25100000   0.40909587
  0.25100000   0.40909587
  0.25100000   0.40909588
  0.25100000   0.40909588
  0.25100000   0.40909588
  0.25100000   0.40909588
  0.25100000   0.40909588
  0.25100000   0.40909588
  0.25100000   0.40909588
  0.25100000   0.40909589
  0.25100000   0.40909589
  0.25100000   0.40909589
  0.25100000   0.40909589
  0.25100000   0.40909589
  0.25100000   0.40909589
  0.25100000   0.40909589
  0.25100000   0.40909589
  0.25100000   0.40909590
  0.25100000   0.40909590
  0.25100000   0.40909590
  0.25100000   0.40909590
  0.25100000   0.40909590
  0.25100000   0.40909590
  0.25100000   0.40909590
  0.25100000   0.40909591
  0.25100000   0.40909591
  0.25100000   0.40909591
  0.25100000   0.40909591
  0.25100000   0.40909591
  0.25100000   0.40909591
  0.25100000   0.40909591
  0.25100000   0.40909591
  0.25200000   0.40994157
  0.25200000   0.40994157
  0.25200000   0.40994157
  0.25200000   0.40994157
  0.25200000   0.40994157
  0.25200000   0.40994158
  0.25200000   0.40994158
  0.25200000   0.40994158
  0.25200000   0.40994158
  0.25200000   0.40994158
  0.25200000   0.40994158
  0.25200000   0.40994158
  0.25200000   0.40994158
  0.25200000   0.40994159
  0.25200000   0.40994159
  0.25200000   0.40994159
  0.25200000   0.40994159
  0.25200000   0.40994159
  0.25200000   0.40994159
  0.25200000   0.40994159
  0.25200000   0.40994160
  0.25200000   0.40994160
  0.25200000   0.40994160
  0.25200000   0.40994160
  0.25200000   0.40994160
  0.25200000   0.40994160
  0.25200000   0.40994160
  0.25200000   0.40994161
  0.25200000   0.40994161
  0.25200000   0.40994161
  0.25200000   0.40994161
  0.25200000   0.40994161
  0.25200000   0.40994161
  0.25200000   0.40994161
  0.25200000   0.40994162
  0.25200000   0.40994162
  0.25200000   0.40994162
  0.25200000   0.40994162
  0.25200000   0.40994162
  0.25200000   0.40994162
  0.25300000   0.41078413
  0.25300000   0.41078413
  0.25300000   0.41078413
  0.25300000   0.41078414
  0.25300000   0.41078414
  0.25300000   0.41078414
  0.25300000   0.41078414
  0.25300000   0.41078414
  0.25300000   0.41078414
  0.25300000   0.41078414
  0.25300000   0.41078415
  0.25300000   0.41078415
  0.25300000   0.41078415
  0.25300000   0.41078415
  0.25300000   0.41078415
  0.25300000   0.41078415
  0.25300000   0.41078415
  0.25300000   0.41078416
  0.25300000   0.41078416
  0.25300000   0.41078416
  0.25300000   0.41078416
  0.25300000   0.41078416
  0.25300000   0.41078416
  0.25300000   0.41078416
  0.25300000   0.41078417
  0.25300000   0.41078417
  0.25300000   0.41078417
  0.25300000   0.41078417
  0.25300000   0.41078417
  0.25300000   0.41078417
  0.25300000   0.41078417
  0.25300000   0.41078418
  0.25300000   0.41078418
  0.25300000   0.41078418
  0.25300000   0.41078418
  0.25300000   0.41078418
  0.25300000   0.41078418
  0.25300000   0.41078418
  0.25300000   0.41078419
  0.25300000   0.41078419
  0.25400000   0.41162357
  0.25400000   0.41162358
  0.25400000   0.41162358
  0.25400000   0.41162358
  0.25400000   0.41162358
  0.25400000   0.41162358
  0.25400000   0.41162358
  0.25400000   0.41162359
  0.25400000   0.41162359
  0.25400000   0.41162359
  0.25400000   0.41162359
  0.25400000   0.41162359
  0.25400000   0.41162359
  0.25400000   0.41162359
  0.25400000   0.41162360
  0.25400000   0.41162360
  0.25400000   0.41162360
  0.25400000   0.41162360
  0.25400000   0.41162360
  0.25400000   0.41162360
  0.25400000   0.41162360
  0.25400000   0.41162361
  0.25400000   0.41162361
  0.25400000   0.41162361
  0.25400000   0.41162361
  0.25400000   0.41162361
  0.25400000   0.41162361
  0.25400000   0.41162362
  0.25400000   0.41162362
  0.25400000   0.41162362
  0.25400000   0.41162362
  0.25400000   0.41162362
  0.25400000   0.41162362
  0.25400000   0.41162362
  0.25400000   0.41162363
  0.25400000   0.41162363
  0.25400000   0.41162363
  0.25400000   0.41162363
  0.25400000   0.41162363
  0.25400000   0.41162363
  0.25500000   0.41245992
  0.25500000   0.41245992
  0.25500000   0.41245992
  0.25500000   0.41245993
  0.25500000   0.41245993
  0.25500000   0.41245993
  0.25500000   0.41245993
  0.25500000   0.41245993
  0.25500000   0.41245993
  0.25500000   0.41245994
  0.25500000   0.41245994
  0.25500000   0.41245994
  0.25500000   0.41245994
  0.25500000   0.41245994
  0.25500000   0.41245994
  0.25500000   0.41245994
  0.25500000   0.41245995
  0.25500000   0.41245995
  0.25500000   0.41245995
  0.25500000   0.41245995
  0.25500000   0.41245995
  0.25500000   0.41245995
  0.25500000   0.41245996
  0.25500000   0.41245996
  0.25500000   0.41245996
  0.25500000   0.41245996
  0.25500000   0.41245996
  0.25500000   0.41245996
  0.25500000   0.41245996
  0.25500000   0.41245997
  0.25500000   0.41245997
  0.25500000   0.41245997
  0.25500000   0.41245997
  0.25500000   0.41245997
  0.25500000   0.41245997
  0.25500000   0.41245998
  0.25500000   0.41245998
  0.25500000   0.41245998
  0.25500000   0.41245998
  0.25500000   0.41245998
  0.25600000   0.41329319
  0.25600000   0.41329319
  0.25600000   0.41329320
  0.25600000   0.41329320
  0.25600000   0.41329320
  0.25600000   0.41329320
  0.25600000   0.41329320
  0.25600000   0.41329320
  0.25600000   0.41329321
  0.25600000   0.41329321
  0.25600000   0.41329321
  0.25600000   0.41329321
  0.25600000   0.41329321
  0.25600000   0.41329321
  0.25600000   0.41329322
  0.25600000   0.41329322
  0.25600000   0.41329322
  0.25600000   0.41329322
  0.25600000   0.41329322
  0.25600000   0.41329322
  0.25600000   0.41329322
  0.25600000   0.41329323
  0.25600000   0.41329323
  0.25600000   0.41329323
  0.25600000   0.41329323
  0.25600000   0.41329323
  0.25600000   0.41329323
  0.25600000   0.41329324
  0.25600000   0.41329324
  0.25600000   0.41329324
  0.25600000   0.41329324
  0.25600000   0.41329324
  0.25600000   0.41329324
  0.25600000   0.41329325
  0.25600000   0.41329325
  0.25600000   0.41329325
  0.25600000   0.41329325
  0.25600000   0.41329325
  0.25600000   0.41329325
  0.25600000   0.41329325
  0.25700000   0.41412341
  0.25700000   0.41412341
  0.25700000   0.41412341
  0.25700000   0.41412342
  0.25700000   0.41412342
  0.25700000   0.41412342
  0.25700000   0.41412342
  0.25700000   0.41412342
  0.25700000   0.41412342
  0.25700000   0.41412343
  0.25700000   0.41412343
  0.25700000   0.41412343
  0.25700000   0.41412343
  0.25700000   0.41412343
  0.25700000   0.41412343
  0.25700000   0.41412344
  0.25700000   0.41412344
  0.25700000   0.41412344
  0.25700000   0.41412344
  0.25700000   0.41412344
  0.25700000   0.41412344
  0.25700000   0.41412345
  0.25700000   0.41412345
  0.25700000   0.41412345
  0.25700000   0.41412345
  0.25700000   0.41412345
  0.25700000   0.41412345
  0.25700000   0.41412346
  0.25700000   0.41412346
  0.25700000   0.41412346
  0.25700000   0.41412346
  0.25700000   0.41412346
  0.25700000   0.41412346
  0.25700000   0.41412347
  0.25700000   0.41412347
  0.25700000   0.41412347
  0.25700000   0.41412347
  0.25700000   0.41412347
  0.25700000   0.41412347
  0.25700000   0.41412348
  0.25800000   0.41495060
  0.25800000   0.41495060
  0.25800000   0.41495060
  0.25800000   0.41495060
  0.25800000   0.41495061
  0.25800000   0.41495061
  0.25800000   0.41495061
  0.25800000   0.41495061
  0.25800000   0.41495061
  0.25800000   0.41495061
  0.25800000   0.41495062
  0.25800000   0.41495062
  0.25800000   0.41495062
  0.25800000   0.41495062
  0.25800000   0.41495062
  0.25800000   0.41495062
  0.25800000   0.41495063
  0.25800000   0.41495063
  0.25800000   0.41495063
  0.25800000   0.41495063
  0.25800000   0.41495063
  0.25800000   0.41495063
  0.25800000   0.41495064
  0.25800000   0.41495064
  0.25800000   0.41495064
  0.25800000   0.41495064
  0.25800000   0.41495064
  0.25800000   0.41495064
  0.25800000   0.41495065
  0.25800000   0.41495065
  0.25800000   0.41495065
  0.25800000   0.41495065
  0.25800000   0.41495065
  0.25800000   0.41495065
  0.25800000   0.41495066
  0.25800000   0.41495066
  0.25800000   0.41495066
  0.25800000   0.41495066
  0.25800000   0.41495066
  0.25800000   0.41495066
  0.25900000   0.41577478
  0.25900000   0.41577478
  0.25900000   0.41577478
  0.25900000   0.41577478
  0.25900000   0.41577478
  0.25900000   0.41577478
  0.25900000   0.41577479
  0.25900000   0.41577479
  0.25900000   0.41577479
  0.25900000   0.41577479
  0.25900000   0.41577479
  0.25900000   0.41577480
  0.25900000   0.41577480
  0.25900000   0.41577480
  0.25900000   0.41577480
  0.25900000   0.41577480
  0.25900000   0.41577480
  0.25900000   0.41577481
  0.25900000   0.41577481
  0.25900000   0.41577481
  0.25900000   0.41577481
  0.25900000   0.41577481
  0.25900000   0.41577481
  0.25900000   0.41577482
  0.25900000   0.41577482
  0.25900000   0.41577482
  0.25900000   0.41577482
  0.25900000   0.41577482
  0.25900000   0.41577483
  0.25900000   0.41577483
  0.25900000   0.41577483
  0.25900000   0.41577483
  0.25900000   0.41577483
  0.25900000   0.41577483
  0.25900000   0.41577484
  0.25900000   0.41577484
  0.25900000   0.41577484
  0.25900000   0.41577484
  0.25900000   0.41577484
  0.25900000   0.41577484
  0.26000000   0.41659596
  0.26000000   0.41659597
  0.26000000   0.41659597
  0.26000000   0.41659597
  0.26000000   0.41659597
  0.26000000   0.41659597
  0.26000000   0.41659598
  0.26000000   0.41659598
  0.26000000   0.41659598
  0.26000000   0.41659598
  0.26000000   0.41659598
  0.26000000   0.41659599
  0.26000000   0.41659599
  0.26000000   0.41659599
  0.26000000   0.41659599
  0.26000000   0.41659599
  0.26000000   0.41659599
  0.26000000   0.41659600
  0.26000000   0.41659600
  0.26000000   0.41659600
  0.26000000   0.41659600
  0.26000000   0.41659600
  0.26000000   0.41659601
  0.26000000   0.41659601
  0.26000000   0.41659601
  0.26000000   0.41659601
  0.26000000   0.41659601
  0.26000000   0.41659601
  0.26000000   0.41659602
  0.26000000   0.41659602
  0.26000000   0.41659602
  0.26000000   0.41659602
  0.26000000   0.41659602
  0.26000000   0.41659602
  0.26000000   0.41659603
  0.26000000   0.41659603
  0.26000000   0.41659603
  0.26000000   0.41659603
  0.26000000   0.41659603
  0.26000000   0.41659604
  0.26100000   0.41741419
  0.26100000   0.41741419
  0.26100000   0.41741419
  0.26100000   0.41741419
  0.26100000   0.41741419
  0.26100000   0.41741420
  0.26100000   0.41741420
  0.26100000   0.41741420
  0.26100000   0.41741420
  0.26100000   0.41741420
  0.26100000   0.41741421
  0.26100000   0.41741421
  0.26100000   0.41741421
  0.26100000   0.41741421
  0.26100000   0.41741421
  0.26100000   0.41741422
  0.26100000   0.41741422
  0.26100000   0.41741422
  0.26100000   0.41741422
  0.26100000   0.41741422
  0.26100000   0.41741422
  0.26100000   0.41741423
  0.26100000   0.41741423
  0.26100000   0.41741423
  0.26100000   0.41741423
  0.26100000   0.41741423
  0.26100000   0.41741424
  0.26100000   0.41741424
  0.26100000   0.41741424
  0.26100000   0.41741424
  0.26100000   0.41741424
  0.26100000   0.41741424
  0.26100000   0.41741425
  0.26100000   0.41741425
  0.26100000   0.41741425
  0.26100000   0.41741425
  0.26100000   0.41741425
  0.26100000   0.41741426
  0.26100000   0.41741426
  0.26100000   0.41741426
  0.26200000   0.41822946
  0.26200000   0.41822946
  0.26200000   0.41822947
  0.26200000   0.41822947
  0.26200000   0.41822947
  0.26200000   0.41822947
  0.26200000   0.41822947
  0.26200000   0.41822948
  0.26200000   0.41822948
  0.26200000   0.41822948
  0.26200000   0.41822948
  0.26200000   0.41822948
  0.26200000   0.41822949
  0.26200000   0.41822949
  0.26200000   0.41822949
  0.26200000   0.41822949
  0.26200000   0.41822949
  0.26200000   0.41822949
  0.26200000   0.41822950
  0.26200000   0.41822950
  0.26200000   0.41822950
  0.26200000   0.41822950
  0.26200000   0.41822950
  0.26200000   0.41822951
  0.26200000   0.41822951
  0.26200000   0.41822951
  0.26200000   0.41822951
  0.26200000   0.41822951
  0.26200000   0.41822952
  0.26200000   0.41822952
  0.26200000   0.41822952
  0.26200000   0.41822952
  0.26200000   0.41822952
  0.26200000   0.41822952
  0.26200000   0.41822953
  0.26200000   0.41822953
  0.26200000   0.41822953
  0.26200000   0.41822953
  0.26200000   0.41822953
  0.26200000   0.41822954
  0.26300000   0.41904181
  0.26300000   0.41904181
  0.26300000   0.41904181
  0.26300000   0.41904182
  0.26300000   0.41904182
  0.26300000   0.41904182
  0.26300000   0.41904182
  0.26300000   0.41904182
  0.26300000   0.41904183
  0.26300000   0.41904183
  0.26300000   0.41904183
  0.26300000   0.41904183
  0.26300000   0.41904183
  0.26300000   0.41904184
  0.26300000   0.41904184
  0.26300000   0.41904184
  0.26300000   0.41904184
  0.26300000   0.41904184
  0.26300000   0.41904185
  0.26300000   0.41904185
  0.26300000   0.41904185
  0.26300000   0.41904185
  0.26300000   0.41904185
  0.26300000   0.41904186
  0.26300000   0.41904186
  0.26300000   0.41904186
  0.26300000   0.41904186
  0.26300000   0.41904186
  0.26300000   0.41904187
  0.26300000   0.41904187
  0.26300000   0.41904187
  0.26300000   0.41904187
  0.26300000   0.41904187
  0.26300000   0.41904188
  0.26300000   0.41904188
  0.26300000   0.41904188
  0.26300000   0.41904188
  0.26300000   0.41904188
  0.26300000   0.41904188
  0.26300000   0.41904189
  0.26400000   0.41985125
  0.26400000   0.41985126
  0.26400000   0.41985126
  0.26400000   0.41985126
  0.26400000   0.41985126
  0.26400000   0.41985126
  0.26400000   0.41985127
  0.26400000   0.41985127
  0.26400000   0.41985127
  0.26400000   0.41985127
  0.26400000   0.41985127
  0.26400000   0.41985128
  0.26400000   0.41985128
  0.26400000   0.41985128
  0.26400000   0.41985128
  0.26400000   0.41985128
  0.26400000   0.41985129
  0.26400000   0.41985129
  0.26400000   0.41985129
  0.26400000   0.41985129
  0.26400000   0.41985129
  0.26400000   0.41985130
  0.26400000   0.41985130
  0.26400000   0.41985130
  0.26400000   0.41985130
  0.26400000   0.41985130
  0.26400000   0.41985131
  0.26400000   0.41985131
  0.26400000   0.41985131
  0.26400000   0.41985131
  0.26400000   0.41985131
  0.26400000   0.41985132
  0.26400000   0.41985132
  0.26400000   0.41985132
  0.26400000   0.41985132
  0.26400000   0.41985132
  0.26400000   0.41985133
  0.26400000   0.41985133
  0.26400000   0.41985133
  0.26400000   0.41985133
  0.26500000   0.42065781
  0.26500000   0.42065781
  0.26500000   0.42065781
  0.26500000   0.42065782
  0.26500000   0.42065782
  0.26500000   0.42065782
  0.26500000   0.42065782
  0.26500000   0.42065783
  0.26500000   0.42065783
  0.26500000   0.42065783
  0.26500000   0.42065783
  0.26500000   0.42065783
  0.26500000   0.42065784
  0.26500000   0.42065784
  0.26500000   0.42065784
  0.26500000   0.42065784
  0.26500000   0.42065784
  0.26500000   0.42065785
  0.26500000   0.42065785
  0.26500000   0.42065785
  0.26500000   0.42065785
  0.26500000   0.42065785
  0.26500000   0.42065786
  0.26500000   0.42065786
  0.26500000   0.42065786
  0.26500000   0.42065786
  0.26500000   0.42065786
  0.26500000   0.42065787
  0.26500000   0.42065787
  0.26500000   0.42065787
  0.26500000   0.42065787
  0.26500000   0.42065787
  0.26500000   0.42065788
  0.26500000   0.42065788
  0.26500000   0.42065788
  0.26500000   0.42065788
  0.26500000   0.42065788
  0.26500000   0.42065789
  0.26500000   0.42065789
  0.26500000   0.42065789
  0.26600000   0.42146150
  0.26600000   0.42146150
  0.26600000   0.42146151
  0.26600000   0.42146151
  0.26600000   0.42146151
  0.26600000   0.42146151
  0.26600000   0.42146151
  0.26600000   0.42146152
  0.26600000   0.42146152
  0.26600000   0.42146152
  0.26600000   0.42146152
  0.26600000   0.42146153
  0.26600000   0.42146153
  0.26600000   0.42146153
  0.26600000   0.42146153
  0.26600000   0.42146153
  0.26600000   0.42146154
  0.26600000   0.42146154
  0.26600000   0.42146154
  0.26600000   0.42146154
  0.26600000   0.42146154
  0.26600000   0.42146155
  0.26600000   0.42146155
  0.26600000   0.42146155
  0.26600000   0.42146155
  0.26600000   0.42146155
  0.26600000   0.42146156
  0.26600000   0.42146156
  0.26600000   0.42146156
  0.26600000   0.42146156
  0.26600000   0.42146156
  0.26600000   0.42146157
  0.26600000   0.42146157
  0.26600000   0.42146157
  0.26600000   0.42146157
  0.26600000   0.42146157
  0.26600000   0.42146158
  0.26600000   0.42146158
  0.26600000   0.42146158
  0.26600000   0.42146158
  0.26700000   0.42226235
  0.26700000   0.42226235
  0.26700000   0.42226235
  0.26700000   0.42226235
  0.26700000   0.42226235
  0.26700000   0.42226236
  0.26700000   0.42226236
  0.26700000   0.42226236
  0.26700000   0.42226236
  0.26700000   0.42226237
  0.26700000   0.42226237
  0.26700000   0.42226237
  0.26700000   0.42226237
  0.26700000   0.42226237
  0.26700000   0.42226238
  0.26700000   0.42226238
  0.26700000   0.42226238
  0.26700000   0.42226238
  0.26700000   0.42226239
  0.26700000   0.42226239
  0.26700000   0.42226239
  0.26700000   0.42226239
  0.26700000   0.42226239
  0.26700000   0.42226240
  0.26700000   0.42226240
  0.26700000   0.42226240
  0.26700000   0.42226240
  0.26700000   0.42226240
  0.26700000   0.42226241
  0.26700000   0.42226241
  0.26700000   0.42226241
  0.26700000   0.42226241
  0.26700000   0.42226241
  0.26700000   0.42226242
  0.26700000   0.42226242
  0.26700000   0.42226242
  0.26700000   0.42226242
  0.26700000   0.42226243
  0.26700000   0.42226243
  0.26700000   0.42226243
  0.26800000   0.42306036
  0.26800000   0.42306037
  0.26800000   0.42306037
  0.26800000   0.42306037
  0.26800000   0.42306037
  0.26800000   0.42306037
  0.26800000   0.42306038
  0.26800000   0.42306038
  0.26800000   0.42306038
  0.26800000   0.42306038
  0.26800000   0.42306039
  0.26800000   0.42306039
  0.26800000   0.42306039
  0.26800000   0.42306039
  0.26800000   0.42306039
  0.26800000   0.42306040
  0.26800000   0.42306040
  0.26800000   0.42306040
  0.26800000   0.42306040
  0.26800000   0.42306041
  0.26800000   0.42306041
  0.26800000   0.42306041
  0.26800000   0.42306041
  0.26800000   0.42306041
  0.26800000   0.42306042
  0.26800000   0.42306042
  0.26800000   0.42306042
  0.26800000   0.42306042
  0.26800000   0.42306043
  0.26800000   0.42306043
  0.26800000   0.42306043
  0.26800000   0.42306043
  0.26800000   0.42306043
  0.26800000   0.42306044
  0.26800000   0.42306044
  0.26800000   0.42306044
  0.26800000   0.42306044
  0.26800000   0.42306044
  0.26800000   0.42306045
  0.26800000   0.42306045
  0.26900000   0.42385557
  0.26900000   0.42385558
  0.26900000   0.42385558
  0.26900000   0.42385558
  0.26900000   0.42385558
  0.26900000   0.42385559
  0.26900000   0.42385559
  0.26900000   0.42385559
  0.26900000   0.42385559
  0.26900000   0.42385559
  0.26900000   0.42385560
  0.26900000   0.42385560
  0.26900000   0.42385560
  0.26900000   0.42385560
  0.26900000   0.42385561
  0.26900000   0.42385561
  0.26900000   0.42385561
  0.26900000   0.42385561
  0.26900000   0.42385561
  0.26900000   0.42385562
  0.26900000   0.42385562
  0.26900000   0.42385562
  0.26900000   0.42385562
  0.26900000   0.42385563
  0.26900000   0.42385563
  0.26900000   0.42385563
  0.26900000   0.42385563
  0.26900000   0.42385563
  0.26900000   0.42385564
  0.26900000   0.42385564
  0.26900000   0.42385564
  0.26900000   0.42385564
  0.26900000   0.42385565
  0.26900000   0.42385565
  0.26900000   0.42385565
  0.26900000   0.42385565
  0.26900000   0.42385565
  0.26900000   0.42385566
  0.26900000   0.42385566
  0.26900000   0.42385566
  0.27000000   0.42464799
  0.27000000   0.42464800
  0.27000000   0.42464800
  0.27000000   0.42464800
  0.27000000   0.42464800
  0.27000000   0.42464801
  0.27000000   0.42464801
  0.27000000   0.42464801
  0.27000000   0.42464801
  0.27000000   0.42464802
  0.27000000   0.42464802
  0.27000000   0.42464802
  0.27000000   0.42464802
  0.27000000   0.42464802
  0.27000000   0.42464803
  0.27000000   0.42464803
  0.27000000   0.42464803
  0.27000000   0.42464803
  0.27000000   0.42464804
  0.27000000   0.42464804
  0.27000000   0.42464804
  0.27000000   0.42464804
  0.27000000   0.42464805
  0.27000000   0.42464805
  0.27000000   0.42464805
  0.27000000   0.42464805
  0.27000000   0.42464805
  0.27000000   0.42464806
  0.27000000   0.42464806
  0.27000000   0.42464806
  0.27000000   0.42464806
  0.27000000   0.42464807
  0.27000000   0.42464807
  0.27000000   0.42464807
  0.27000000   0.42464807
  0.27000000   0.42464807
  0.27000000   0.42464808
  0.27000000   0.42464808
  0.27000000   0.42464808
  0.27000000   0.42464808
  0.27100000   0.42543765
  0.27100000   0.42543765
  0.27100000   0.42543765
  0.27100000   0.42543765
  0.27100000   0.42543765
  0.27100000   0.42543766
  0.27100000   0.42543766
  0.27100000   0.42543766
  0.27100000   0.42543766
  0.27100000   0.42543767
  0.27100000   0.42543767
  0.27100000   0.42543767
  0.27100000   0.42543767
  0.27100000   0.42543768
  0.27100000   0.42543768
  0.27100000   0.42543768
  0.27100000   0.42543768
  0.27100000   0.42543769
  0.27100000   0.42543769
  0.27100000   0.42543769
  0.27100000   0.42543769
  0.27100000   0.42543769
  0.27100000   0.42543770
  0.27100000   0.42543770
  0.27100000   0.42543770
  0.27100000   0.42543770
  0.27100000   0.42543771
  0.27100000   0.42543771
  0.27100000   0.42543771
  0.27100000   0.42543771
  0.27100000   0.42543772
  0.27100000   0.42543772
  0.27100000   0.42543772
  0.27100000   0.42543772
  0.27100000   0.42543772
  0.27100000   0.42543773
  0.27100000   0.42543773
  0.27100000   0.42543773
  0.27100000   0.42543773
  0.27100000   0.42543774
  0.27200000   0.42622454
  0.27200000   0.42622455
  0.27200000   0.42622455
  0.27200000   0.42622455
  0.27200000   0.42622455
  0.27200000   0.42622456
  0.27200000   0.42622456
  0.27200000   0.42622456
  0.27200000   0.42622456
  0.27200000   0.42622457
  0.27200000   0.42622457
  0.27200000   0.42622457
  0.27200000   0.42622457
  0.27200000   0.42622458
  0.27200000   0.42622458
  0.27200000   0.42622458
  0.27200000   0.42622458
  0.27200000   0.42622459
  0.27200000   0.42622459
  0.27200000   0.42622459
  0.27200000   0.42622459
  0.27200000   0.42622460
  0.27200000   0.42622460
  0.27200000   0.42622460
  0.27200000   0.42622460
  0.27200000   0.42622460
  0.27200000   0.42622461
  0.27200000   0.42622461
  0.27200000   0.42622461
  0.27200000   0.42622461
  0.27200000   0.42622462
  0.27200000   0.42622462
  0.27200000   0.42622462
  0.27200000   0.42622462
  0.27200000   0.42622463
  0.27200000   0.42622463
  0.27200000   0.42622463
  0.27200000   0.42622463
  0.27200000   0.42622463
  0.27200000   0.42622464
  0.27300000   0.42700871
  0.27300000   0.42700871
  0.27300000   0.42700872
  0.27300000   0.42700872
  0.27300000   0.42700872
  0.27300000   0.42700872
  0.27300000   0.42700873
  0.27300000   0.42700873
  0.27300000   0.42700873
  0.27300000   0.42700873
  0.27300000   0.42700874
  0.27300000   0.42700874
  0.27300000   0.42700874
  0.27300000   0.42700874
  0.27300000   0.42700875
  0.27300000   0.42700875
  0.27300000   0.42700875
  0.27300000   0.42700875
  0.27300000   0.42700875
  0.27300000   0.42700876
  0.27300000   0.42700876
  0.27300000   0.42700876
  0.27300000   0.42700876
  0.27300000   0.42700877
  0.27300000   0.42700877
  0.27300000   0.42700877
  0.27300000   0.42700877
  0.27300000   0.42700878
  0.27300000   0.42700878
  0.27300000   0.42700878
  0.27300000   0.42700878
  0.27300000   0.42700879
  0.27300000   0.42700879
  0.27300000   0.42700879
  0.27300000   0.42700879
  0.27300000   0.42700880
  0.27300000   0.42700880
  0.27300000   0.42700880
  0.27300000   0.42700880
  0.27300000   0.42700880
  0.27400000   0.42779016
  0.27400000   0.42779016
  0.27400000   0.42779017
  0.27400000   0.42779017
  0.27400000   0.42779017
  0.27400000   0.42779017
  0.27400000   0.42779018
  0.27400000   0.42779018
  0.27400000   0.42779018
  0.27400000   0.42779018
  0.27400000   0.42779019
  0.27400000   0.42779019
  0.27400000   0.42779019
  0.27400000   0.42779019
  0.27400000   0.42779020
  0.27400000   0.42779020
  0.27400000   0.42779020
  0.27400000   0.42779020
  0.27400000   0.42779021
  0.27400000   0.42779021
  0.27400000   0.42779021
  0.27400000   0.42779021
  0.27400000   0.42779022
  0.27400000   0.42779022
  0.27400000   0.42779022
  0.27400000   0.42779022
  0.27400000   0.42779023
  0.27400000   0.42779023
  0.27400000   0.42779023
  0.27400000   0.42779023
  0.27400000   0.42779024
  0.27400000   0.42779024
  0.27400000   0.42779024
  0.27400000   0.42779024
  0.27400000   0.42779025
  0.27400000   0.42779025
  0.27400000   0.42779025
  0.27400000   0.42779025
  0.27400000   0.42779025
  0.27400000   0.42779026
  0.27500000   0.42856892
  0.27500000   0.42856892
  0.27500000   0.42856892
  0.27500000   0.42856892
  0.27500000   0.42856893
  0.27500000   0.42856893
  0.27500000   0.42856893
  0.27500000   0.42856893
  0.27500000   0.42856894
  0.27500000   0.42856894
  0.27500000   0.42856894
  0.27500000   0.42856894
  0.27500000   0.42856895
  0.27500000   0.42856895
  0.27500000   0.42856895
  0.27500000   0.42856895
  0.27500000   0.42856896
  0.27500000   0.42856896
  0.27500000   0.42856896
  0.27500000   0.42856896
  0.27500000   0.42856897
  0.27500000   0.42856897
  0.27500000   0.42856897
  0.27500000   0.42856897
  0.27500000   0.42856898
  0.27500000   0.42856898
  0.27500000   0.42856898
  0.27500000   0.42856898
  0.27500000   0.42856899
  0.27500000   0.42856899
  0.27500000   0.42856899
  0.27500000   0.42856899
  0.27500000   0.42856900
  0.27500000   0.42856900
  0.27500000   0.42856900
  0.27500000   0.42856900
  0.27500000   0.42856901
  0.27500000   0.42856901
  0.27500000   0.42856901
  0.27500000   0.42856901
  0.27600000   0.42934499
  0.27600000   0.42934499
  0.27600000   0.42934500
  0.27600000   0.42934500
  0.27600000   0.42934500
  0.27600000   0.42934500
  0.27600000   0.42934501
  0.27600000   0.42934501
  0.27600000   0.42934501
  0.27600000   0.42934501
  0.27600000   0.42934502
  0.27600000   0.42934502
  0.27600000   0.42934502
  0.27600000   0.42934503
  0.27600000   0.42934503
  0.27600000   0.42934503
  0.27600000   0.42934503
  0.27600000   0.42934504
  0.27600000   0.42934504
  0.27600000   0.42934504
  0.27600000   0.42934504
  0.27600000   0.42934505
  0.27600000   0.42934505
  0.27600000   0.42934505
  0.27600000   0.42934505
  0.27600000   0.42934506
  0.27600000   0.42934506
  0.27600000   0.42934506
  0.27600000   0.42934506
  0.27600000   0.42934507
  0.27600000   0.42934507
  0.27600000   0.42934507
  0.27600000   0.42934507
  0.27600000   0.42934508
  0.27600000   0.42934508
  0.27600000   0.42934508
  0.27600000   0.42934508
  0.27600000   0.42934508
  0.27600000   0.42934509
  0.27600000   0.42934509
  0.27700000   0.43011840
  0.27700000   0.43011841
  0.27700000   0.43011841
  0.27700000   0.43011841
  0.27700000   0.43011842
  0.27700000   0.43011842
  0.27700000   0.43011842
  0.27700000   0.43011842
  0.27700000   0.43011843
  0.27700000   0.43011843
  0.27700000   0.43011843
  0.27700000   0.43011843
  0.27700000   0.43011844
  0.27700000   0.43011844
  0.27700000   0.43011844
  0.27700000   0.43011844
  0.27700000   0.43011845
  0.27700000   0.43011845
  0.27700000   0.43011845
  0.27700000   0.43011845
  0.27700000   0.43011846
  0.27700000   0.43011846
  0.27700000   0.43011846
  0.27700000   0.43011846
  0.27700000   0.43011847
  0.27700000   0.43011847
  0.27700000   0.43011847
  0.27700000   0.43011847
  0.27700000   0.43011848
  0.27700000   0.43011848
  0.27700000   0.43011848
  0.27700000   0.43011848
  0.27700000   0.43011849
  0.27700000   0.43011849
  0.27700000   0.43011849
  0.27700000   0.43011849
  0.27700000   0.43011850
  0.27700000   0.43011850
  0.27700000   0.43011850
  0.27700000   0.43011850
  0.27800000   0.43088917
  0.27800000   0.43088918
  0.27800000   0.43088918
  0.27800000   0.43088918
  0.27800000   0.43088918
  0.27800000   0.43088919
  0.27800000   0.43088919
  0.27800000   0.43088919
  0.27800000   0.43088920
  0.27800000   0.43088920
  0.27800000   0.43088920
  0.27800000   0.43088920
  0.27800000   0.43088921
  0.27800000   0.43088921
  0.27800000   0.43088921
  0.27800000   0.43088921
  0.27800000   0.43088922
  0.27800000   0.43088922
  0.27800000   0.43088922
  0.27800000   0.43088922
  0.27800000   0.43088923
  0.27800000   0.43088923
  0.27800000   0.43088923
  0.27800000   0.43088923
  0.27800000   0.43088924
  0.27800000   0.43088924
  0.27800000   0.43088924
  0.27800000   0.43088925
  0.27800000   0.43088925
  0.27800000   0.43088925
  0.27800000   0.43088925
  0.27800000   0.43088926
  0.27800000   0.43088926
  0.27800000   0.43088926
  0.27800000   0.43088926
  0.27800000   0.43088927
  0.27800000   0.43088927
  0.27800000   0.43088927
  0.27800000   0.43088927
  0.27800000   0.43088928
  0.27900000   0.43165732
  0.27900000   0.43165732
  0.27900000   0.43165732
  0.27900000   0.43165732
  0.27900000   0.43165733
  0.27900000   0.43165733
  0.27900000   0.43165733
  0.27900000   0.43165734
  0.27900000   0.43165734
  0.27900000   0.43165734
  0.27900000   0.43165734
  0.27900000   0.43165735
  0.27900000   0.43165735
  0.27900000   0.43165735
  0.27900000   0.43165735
  0.27900000   0.43165736
  0.27900000   0.43165736
  0.27900000   0.43165736
  0.27900000   0.43165736
  0.27900000   0.43165737
  0.27900000   0.43165737
  0.27900000   0.43165737
  0.27900000   0.43165738
  0.27900000   0.43165738
  0.27900000   0.43165738
  0.27900000   0.43165738
  0.27900000   0.43165739
  0.27900000   0.43165739
  0.27900000   0.43165739
  0.27900000   0.43165739
  0.27900000   0.43165740
  0.27900000   0.43165740
  0.27900000   0.43165740
  0.27900000   0.43165740
  0.27900000   0.43165741
  0.27900000   0.43165741
  0.27900000   0.43165741
  0.27900000   0.43165741
  0.27900000   0.43165742
  0.27900000   0.43165742
  0.28000000   0.43242285
  0.28000000   0.43242285
  0.28000000   0.43242285
  0.28000000   0.43242286
  0.28000000   0.43242286
  0.28000000   0.43242286
  0.28000000   0.43242287
  0.28000000   0.43242287
  0.28000000   0.43242287
  0.28000000   0.43242287
  0.28000000   0.43242288
  0.28000000   0.43242288
  0.28000000   0.43242288
  0.28000000   0.43242288
  0.28000000   0.43242289
  0.28000000   0.43242289
  0.28000000   0.43242289
  0.28000000   0.43242289
  0.28000000   0.43242290
  0.28000000   0.43242290
  0.28000000   0.43242290
  0.28000000   0.43242291
  0.28000000   0.43242291
  0.28000000   0.43242291
  0.28000000   0.43242291
  0.28000000   0.43242292
  0.28000000   0.43242292
  0.28000000   0.43242292
  0.28000000   0.43242292
  0.28000000   0.43242293
  0.28000000   0.43242293
  0.28000000   0.43242293
  0.28000000   0.43242293
  0.28000000   0.43242294
  0.28000000   0.43242294
  0.28000000   0.43242294
  0.28000000   0.43242295
  0.28000000   0.43242295
  0.28000000   0.43242295
  0.28000000   0.43242295
  0.28100000   0.43318579
  0.28100000   0.43318579
  0.28100000   0.43318579
  0.28100000   0.43318580
  0.28100000   0.43318580
  0.28100000   0.43318580
  0.28100000   0.43318580
  0.28100000   0.43318581
  0.28100000   0.43318581
  0.28100000   0.43318581
  0.28100000   0.43318582
  0.28100000   0.43318582
  0.28100000   0.43318582
  0.28100000   0.43318582
  0.28100000   0.43318583
  0.28100000   0.43318583
  0.28100000   0.43318583
  0.28100000   0.43318583
  0.28100000   0.43318584
  0.28100000   0.43318584
  0.28100000   0.43318584
  0.28100000   0.43318585
  0.28100000   0.43318585
  0.28100000   0.43318585
  0.28100000   0.43318585
  0.28100000   0.43318586
  0.28100000   0.43318586
  0.28100000   0.43318586
  0.28100000   0.43318586
  0.28100000   0.43318587
  0.28100000   0.43318587
  0.28100000   0.43318587
  0.28100000   0.43318588
  0.28100000   0.43318588
  0.28100000   0.43318588
  0.28100000   0.43318588
  0.28100000   0.43318589
  0.28100000   0.43318589
  0.28100000   0.43318589
  0.28100000   0.43318589
  0.28200000   0.43394615
  0.28200000   0.43394615
  0.28200000   0.43394616
  0.28200000   0.43394616
  0.28200000   0.43394616
  0.28200000   0.43394616
  0.28200000   0.43394617
  0.28200000   0.43394617
  0.28200000   0.43394617
  0.28200000   0.43394618
  0.28200000   0.43394618
  0.28200000   0.43394618
  0.28200000   0.43394618
  0.28200000   0.43394619
  0.28200000   0.43394619
  0.28200000   0.43394619
  0.28200000   0.43394620
  0.28200000   0.43394620
  0.28200000   0.43394620
  0.28200000   0.43394620
  0.28200000   0.43394621
  0.28200000   0.43394621
  0.28200000   0.43394621
  0.28200000   0.43394621
  0.28200000   0.43394622
  0.28200000   0.43394622
  0.28200000   0.43394622
  0.28200000   0.43394623
  0.28200000   0.43394623
  0.28200000   0.43394623
  0.28200000   0.43394623
  0.28200000   0.43394624
  0.28200000   0.43394624
  0.28200000   0.43394624
  0.28200000   0.43394624
  0.28200000   0.43394625
  0.28200000   0.43394625
  0.28200000   0.43394625
  0.28200000   0.43394626
  0.28200000   0.43394626
  0.28300000   0.43470395
  0.28300000   0.43470396
  0.28300000   0.43470396
  0.28300000   0.43470396
  0.28300000   0.43470396
  0.28300000   0.43470397
  0.28300000   0.43470397
  0.28300000   0.43470397
  0.28300000   0.43470398
  0.28300000   0.43470398
  0.28300000   0.43470398
  0.28300000   0.43470398
  0.28300000   0.43470399
  0.28300000   0.43470399
  0.28300000   0.43470399
  0.28300000   0.43470400
  0.28300000   0.43470400
  0.28300000   0.43470400
  0.28300000   0.43470400
  0.28300000   0.43470401
  0.28300000   0.43470401
  0.28300000   0.43470401
  0.28300000   0.43470402
  0.28300000   0.43470402
  0.28300000   0.43470402
  0.28300000   0.43470402
  0.28300000   0.43470403
  0.28300000   0.43470403
  0.28300000   0.43470403
  0.28300000   0.43470403
  0.28300000   0.43470404
  0.28300000   0.43470404
  0.28300000   0.43470404
  0.28300000   0.43470405
  0.28300000   0.43470405
  0.28300000   0.43470405
  0.28300000   0.43470405
  0.28300000   0.43470406
  0.28300000   0.43470406
  0.28300000   0.43470406
  0.28400000   0.43545921
  0.28400000   0.43545922
  0.28400000   0.43545922
  0.28400000   0.43545922
  0.28400000   0.43545922
  0.28400000   0.43545923
  0.28400000   0.43545923
  0.28400000   0.43545923
  0.28400000   0.43545924
  0.28400000   0.43545924
  0.28400000   0.43545924
  0.28400000   0.43545924
  0.28400000   0.43545925
  0.28400000   0.43545925
  0.28400000   0.43545925
  0.28400000   0.43545926
  0.28400000   0.43545926
  0.28400000   0.43545926
  0.28400000   0.43545926
  0.28400000   0.43545927
  0.28400000   0.43545927
  0.28400000   0.43545927
  0.28400000   0.43545928
  0.28400000   0.43545928
  0.28400000   0.43545928
  0.28400000   0.43545928
  0.28400000   0.43545929
  0.28400000   0.43545929
  0.28400000   0.43545929
  0.28400000   0.43545930
  0.28400000   0.43545930
  0.28400000   0.43545930
  0.28400000   0.43545930
  0.28400000   0.43545931
  0.28400000   0.43545931
  0.28400000   0.43545931
  0.28400000   0.43545931
  0.28400000   0.43545932
  0.28400000   0.43545932
  0.28400000   0.43545932
  0.28500000   0.43621194
  0.28500000   0.43621195
  0.28500000   0.43621195
  0.28500000   0.43621195
  0.28500000   0.43621196
  0.28500000   0.43621196
  0.28500000   0.43621196
  0.28500000   0.43621196
  0.28500000   0.43621197
  0.28500000   0.43621197
  0.28500000   0.43621197
  0.28500000   0.43621198
  0.28500000   0.43621198
  0.28500000   0.43621198
  0.28500000   0.43621199
  0.28500000   0.43621199
  0.28500000   0.43621199
  0.28500000   0.43621199
  0.28500000   0.43621200
  0.28500000   0.43621200
  0.28500000   0.43621200
  0.28500000   0.43621201
  0.28500000   0.43621201
  0.28500000   0.43621201
  0.28500000   0.43621201
  0.28500000   0.43621202
  0.28500000   0.43621202
  0.28500000   0.43621202
  0.28500000   0.43621203
  0.28500000   0.43621203
  0.28500000   0.43621203
  0.28500000   0.43621203
  0.28500000   0.43621204
  0.28500000   0.43621204
  0.28500000   0.43621204
  0.28500000   0.43621204
  0.28500000   0.43621205
  0.28500000   0.43621205
  0.28500000   0.43621205
  0.28500000   0.43621206
  0.28600000   0.43696216
  0.28600000   0.43696217
  0.28600000   0.43696217
  0.28600000   0.43696217
  0.28600000   0.43696218
  0.28600000   0.43696218
  0.28600000   0.43696218
  0.28600000   0.43696219
  0.28600000   0.43696219
  0.28600000   0.43696219
  0.28600000   0.43696219
  0.28600000   0.43696220
  0.28600000   0.43696220
  0.28600000   0.43696220
  0.28600000   0.43696221
  0.28600000   0.43696221
  0.28600000   0.43696221
  0.28600000   0.43696222
  0.28600000   0.43696222
  0.28600000   0.43696222
  0.28600000   0.43696222
  0.28600000   0.43696223
  0.28600000   0.43696223
  0.28600000   0.43696223
  0.28600000   0.43696224
  0.28600000   0.43696224
  0.28600000   0.43696224
  0.28600000   0.43696224
  0.28600000   0.43696225
  0.28600000   0.43696225
  0.28600000   0.43696225
  0.28600000   0.43696226
  0.28600000   0.43696226
  0.28600000   0.43696226
  0.28600000   0.43696226
  0.28600000   0.43696227
  0.28600000   0.43696227
  0.28600000   0.43696227
  0.28600000   0.43696228
  0.28600000   0.43696228
  0.28700000   0.43770989
  0.28700000   0.43770989
  0.28700000   0.43770990
  0.28700000   0.43770990
  0.28700000   0.43770990
  0.28700000   0.43770990
  0.28700000   0.43770991
  0.28700000   0.43770991
  0.28700000   0.43770991
  0.28700000   0.43770992
  0.28700000   0.43770992
  0.28700000   0.43770992
  0.28700000   0.43770993
  0.28700000   0.43770993
  0.28700000   0.43770993
  0.28700000   0.43770993
  0.28700000   0.43770994
  0.28700000   0.43770994
  0.28700000   0.43770994
  0.28700000   0.43770995
  0.28700000   0.43770995
  0.28700000   0.43770995
  0.28700000   0.43770996
  0.28700000   0.43770996
  0.28700000   0.43770996
  0.28700000   0.43770996
  0.28700000   0.43770997
  0.28700000   0.43770997
  0.28700000   0.43770997
  0.28700000   0.43770998
  0.28700000   0.43770998
  0.28700000   0.43770998
  0.28700000   0.43770998
  0.28700000   0.43770999
  0.28700000   0.43770999
  0.28700000   0.43770999
  0.28700000   0.43771000
  0.28700000   0.43771000
  0.28700000   0.43771000
  0.28700000   0.43771000
  0.28800000   0.43845513
  0.28800000   0.43845514
  0.28800000   0.43845514
  0.28800000   0.43845514
  0.28800000   0.43845515
  0.28800000   0.43845515
  0.28800000   0.43845515
  0.28800000   0.43845516
  0.28800000   0.43845516
  0.28800000   0.43845516
  0.28800000   0.43845517
  0.28800000   0.43845517
  0.28800000   0.43845517
  0.28800000   0.43845517
  0.28800000   0.43845518
  0.28800000   0.43845518
  0.28800000   0.43845518
  0.28800000   0.43845519
  0.28800000   0.43845519
  0.28800000   0.43845519
  0.28800000   0.43845520
  0.28800000   0.43845520
  0.28800000   0.43845520
  0.28800000   0.43845520
  0.28800000   0.43845521
  0.28800000   0.43845521
  0.28800000   0.43845521
  0.28800000   0.43845522
  0.28800000   0.43845522
  0.28800000   0.43845522
  0.28800000   0.43845523
  0.28800000   0.43845523
  0.28800000   0.43845523
  0.28800000   0.43845523
  0.28800000   0.43845524
  0.28800000   0.43845524
  0.28800000   0.43845524
  0.28800000   0.43845525
  0.28800000   0.43845525
  0.28800000   0.43845525
  0.28900000   0.43919792
  0.28900000   0.43919792
  0.28900000   0.43919792
  0.28900000   0.43919793
  0.28900000   0.43919793
  0.28900000   0.43919793
  0.28900000   0.43919793
  0.28900000   0.43919794
  0.28900000   0.43919794
  0.28900000   0.43919794
  0.28900000   0.43919795
  0.28900000   0.43919795
  0.28900000   0.43919795
  0.28900000   0.43919796
  0.28900000   0.43919796
  0.28900000   0.43919796
  0.28900000   0.43919797
  0.28900000   0.43919797
  0.28900000   0.43919797
  0.28900000   0.43919797
  0.28900000   0.43919798
  0.28900000   0.43919798
  0.28900000   0.43919798
  0.28900000   0.43919799
  0.28900000   0.43919799
  0.28900000   0.43919799
  0.28900000   0.43919800
  0.28900000   0.43919800
  0.28900000   0.43919800
  0.28900000   0.43919800
  0.28900000   0.43919801
  0.28900000   0.43919801
  0.28900000   0.43919801
  0.28900000   0.43919802
  0.28900000   0.43919802
  0.28900000   0.43919802
  0.28900000   0.43919802
  0.28900000   0.43919803
  0.28900000   0.43919803
  0.28900000   0.43919803
  0.29000000   0.43993825
  0.29000000   0.43993825
  0.29000000   0.43993825
  0.29000000   0.43993826
  0.29000000   0.43993826
  0.29000000   0.43993826
  0.29000000   0.43993827
  0.29000000   0.43993827
  0.29000000   0.43993827
  0.29000000   0.43993828
  0.29000000   0.43993828
  0.29000000   0.43993828
  0.29000000   0.43993829
  0.29000000   0.43993829
  0.29000000   0.43993829
  0.29000000   0.43993829
  0.29000000   0.43993830
  0.29000000   0.43993830
  0.29000000   0.43993830
  0.29000000   0.43993831
  0.29000000   0.43993831
  0.29000000   0.43993831
  0.29000000   0.43993832
  0.29000000   0.43993832
  0.29000000   0.43993832
  0.29000000   0.43993833
  0.29000000   0.43993833
  0.29000000   0.43993833
  0.29000000   0.43993833
  0.29000000   0.43993834
  0.29000000   0.43993834
  0.29000000   0.43993834
  0.29000000   0.43993835
  0.29000000   0.43993835
  0.29000000   0.43993835
  0.29000000   0.43993836
  0.29000000   0.43993836
  0.29000000   0.43993836
  0.29000000   0.43993836
  0.29000000   0.43993837
  0.29100000   0.44067615
  0.29100000   0.44067615
  0.29100000   0.44067615
  0.29100000   0.44067616
  0.29100000   0.44067616
  0.29100000   0.44067616
  0.29100000   0.44067617
  0.29100000   0.44067617
  0.29100000   0.44067617
  0.29100000   0.44067618
  0.29100000   0.44067618
  0.29100000   0.44067618
  0.29100000   0.44067618
  0.29100000   0.44067619
  0.29100000   0.44067619
  0.29100000   0.44067619
  0.29100000   0.44067620
  0.29100000   0.44067620
  0.29100000   0.44067620
  0.29100000   0.44067621
  0.29100000   0.44067621
  0.29100000   0.44067621
  0.29100000   0.44067622
  0.29100000   0.44067622
  0.29100000   0.44067622
  0.29100000   0.44067622
  0.29100000   0.44067623
  0.29100000   0.44067623
  0.29100000   0.44067623
  0.29100000   0.44067624
  0.29100000   0.44067624
  0.29100000   0.44067624
  0.29100000   0.44067625
  0.29100000   0.44067625
  0.29100000   0.44067625
  0.29100000   0.44067625
  0.29100000   0.44067626
  0.29100000   0.44067626
  0.29100000   0.44067626
  0.29100000   0.44067627
  0.29200000   0.44141163
  0.29200000   0.44141163
  0.29200000   0.44141163
  0.29200000   0.44141164
  0.29200000   0.44141164
  0.29200000   0.44141164
  0.29200000   0.44141165
  0.29200000   0.44141165
  0.29200000   0.44141165
  0.29200000   0.44141166
  0.29200000   0.44141166
  0.29200000   0.44141166
  0.29200000   0.44141166
  0.29200000   0.44141167
  0.29200000   0.44141167
  0.29200000   0.44141167
  0.29200000   0.44141168
  0.29200000   0.44141168
  0.29200000   0.44141168
  0.29200000   0.44141169
  0.29200000   0.44141169
  0.29200000   0.44141169
  0.29200000   0.44141170
  0.29200000   0.44141170
  0.29200000   0.44141170
  0.29200000   0.44141171
  0.29200000   0.44141171
  0.29200000   0.44141171
  0.29200000   0.44141171
  0.29200000   0.44141172
  0.29200000   0.44141172
  0.29200000   0.44141172
  0.29200000   0.44141173
  0.29200000   0.44141173
  0.29200000   0.44141173
  0.29200000   0.44141174
  0.29200000   0.44141174
  0.29200000   0.44141174
  0.29200000   0.44141174
  0.29200000   0.44141175
  0.29300000   0.44214470
  0.29300000   0.44214471
  0.29300000   0.44214471
  0.29300000   0.44214471
  0.29300000   0.44214472
  0.29300000   0.44214472
  0.29300000   0.44214472
  0.29300000   0.44214473
  0.29300000   0.44214473
  0.29300000   0.44214473
  0.29300000   0.44214473
  0.29300000   0.44214474
  0.29300000   0.44214474
  0.29300000   0.44214474
  0.29300000   0.44214475
  0.29300000   0.44214475
  0.29300000   0.44214475
  0.29300000   0.44214476
  0.29300000   0.44214476
  0.29300000   0.44214476
  0.29300000   0.44214477
  0.29300000   0.44214477
  0.29300000   0.44214477
  0.29300000   0.44214478
  0.29300000   0.44214478
  0.29300000   0.44214478
  0.29300000   0.44214479
  0.29300000   0.44214479
  0.29300000   0.44214479
  0.29300000   0.44214479
  0.29300000   0.44214480
  0.29300000   0.44214480
  0.29300000   0.44214480
  0.29300000   0.44214481
  0.29300000   0.44214481
  0.29300000   0.44214481
  0.29300000   0.44214482
  0.29300000   0.44214482
  0.29300000   0.44214482
  0.29300000   0.44214483
  0.29400000   0.44287539
  0.29400000   0.44287539
  0.29400000   0.44287540
  0.29400000   0.44287540
  0.29400000   0.44287540
  0.29400000   0.44287541
  0.29400000   0.44287541
  0.29400000   0.44287541
  0.29400000   0.44287542
  0.29400000   0.44287542
  0.29400000   0.44287542
  0.29400000   0.44287543
  0.29400000   0.44287543
  0.29400000   0.44287543
  0.29400000   0.44287544
  0.29400000   0.44287544
  0.29400000   0.44287544
  0.29400000   0.44287545
  0.29400000   0.44287545
  0.29400000   0.44287545
  0.29400000   0.44287545
  0.29400000   0.44287546
  0.29400000   0.44287546
  0.29400000   0.44287546
  0.29400000   0.44287547
  0.29400000   0.44287547
  0.29400000   0.44287547
  0.29400000   0.44287548
  0.29400000   0.44287548
  0.29400000   0.44287548
  0.29400000   0.44287549
  0.29400000   0.44287549
  0.29400000   0.44287549
  0.29400000   0.44287550
  0.29400000   0.44287550
  0.29400000   0.44287550
  0.29400000   0.44287550
  0.29400000   0.44287551
  0.29400000   0.44287551
  0.29400000   0.44287551
  0.29500000   0.44360370
  0.29500000   0.44360371
  0.29500000   0.44360371
  0.29500000   0.44360371
  0.29500000   0.44360372
  0.29500000   0.44360372
  0.29500000   0.44360372
  0.29500000   0.44360373
  0.29500000   0.44360373
  0.29500000   0.44360373
  0.29500000   0.44360374
  0.29500000   0.44360374
  0.29500000   0.44360374
  0.29500000   0.44360375
  0.29500000   0.44360375
  0.29500000   0.44360375
  0.29500000   0.44360376
  0.29500000   0.44360376
  0.29500000   0.44360376
  0.29500000   0.44360377
  0.29500000   0.44360377
  0.29500000   0.44360377
  0.29500000   0.44360377
  0.29500000   0.44360378
  0.29500000   0.44360378
  0.29500000   0.44360378
  0.29500000   0.44360379
  0.29500000   0.44360379
  0.29500000   0.44360379
  0.29500000   0.44360380
  0.29500000   0.44360380
  0.29500000   0.44360380
  0.29500000   0.44360381
  0.29500000   0.44360381
  0.29500000   0.44360381
  0.29500000   0.44360382
  0.29500000   0.44360382
  0.29500000   0.44360382
  0.29500000   0.44360383
  0.29500000   0.44360383
  0.29600000   0.44432966
  0.29600000   0.44432966
  0.29600000   0.44432966
  0.29600000   0.44432967
  0.29600000   0.44432967
  0.29600000   0.44432967
  0.29600000   0.44432968
  0.29600000   0.44432968
  0.29600000   0.44432968
  0.29600000   0.44432969
  0.29600000   0.44432969
  0.29600000   0.44432969
  0.29600000   0.44432970
  0.29600000   0.44432970
  0.29600000   0.44432970
  0.29600000   0.44432971
  0.29600000   0.44432971
  0.29600000   0.44432971
  0.29600000   0.44432972
  0.29600000   0.44432972
  0.29600000   0.44432972
  0.29600000   0.44432973
  0.29600000   0.44432973
  0.29600000   0.44432973
  0.29600000   0.44432974
  0.29600000   0.44432974
  0.29600000   0.44432974
  0.29600000   0.44432974
  0.29600000   0.44432975
  0.29600000   0.44432975
  0.29600000   0.44432975
  0.29600000   0.44432976
  0.29600000   0.44432976
  0.29600000   0.44432976
  0.29600000   0.44432977
  0.29600000   0.44432977
  0.29600000   0.44432977
  0.29600000   0.44432978
  0.29600000   0.44432978
  0.29600000   0.44432978
  0.29700000   0.44505326
  0.29700000   0.44505327
  0.29700000   0.44505327
  0.29700000   0.44505327
  0.29700000   0.44505328
  0.29700000   0.44505328
  0.29700000   0.44505328
  0.29700000   0.44505329
  0.29700000   0.44505329
  0.29700000   0.44505329
  0.29700000   0.44505330
  0.29700000   0.44505330
  0.29700000   0.44505330
  0.29700000   0.44505331
  0.29700000   0.44505331
  0.29700000   0.44505331
  0.29700000   0.44505332
  0.29700000   0.44505332
  0.29700000   0.44505332
  0.29700000   0.44505333
  0.29700000   0.44505333
  0.29700000   0.44505333
  0.29700000   0.44505334
  0.29700000   0.44505334
  0.29700000   0.44505334
  0.29700000   0.44505335
  0.29700000   0.44505335
  0.29700000   0.44505335
  0.29700000   0.44505336
  0.29700000   0.44505336
  0.29700000   0.44505336
  0.29700000   0.44505337
  0.29700000   0.44505337
  0.29700000   0.44505337
  0.29700000   0.44505338
  0.29700000   0.44505338
  0.29700000   0.44505338
  0.29700000   0.44505339
  0.29700000   0.44505339
  0.29700000   0.44505339
  0.29800000   0.44577454
  0.29800000   0.44577454
  0.29800000   0.44577455
  0.29800000   0.44577455
  0.29800000   0.44577455
  0.29800000   0.44577456
  0.29800000   0.44577456
  0.29800000   0.44577456
  0.29800000   0.44577457
  0.29800000   0.44577457
  0.29800000   0.44577457
  0.29800000   0.44577458
  0.29800000   0.44577458
  0.29800000   0.44577458
  0.29800000   0.44577459
  0.29800000   0.44577459
  0.29800000   0.44577459
  0.29800000   0.44577460
  0.29800000   0.44577460
  0.29800000   0.44577460
  0.29800000   0.44577461
  0.29800000   0.44577461
  0.29800000   0.44577461
  0.29800000   0.44577462
  0.29800000   0.44577462
  0.29800000   0.44577462
  0.29800000   0.44577463
  0.29800000   0.44577463
  0.29800000   0.44577463
  0.29800000   0.44577464
  0.29800000   0.44577464
  0.29800000   0.44577464
  0.29800000   0.44577465
  0.29800000   0.44577465
  0.29800000   0.44577465
  0.29800000   0.44577466
  0.29800000   0.44577466
  0.29800000   0.44577466
  0.29800000   0.44577467
  0.29800000   0.44577467
  0.29900000   0.44649350
  0.29900000   0.44649350
  0.29900000   0.44649351
  0.29900000   0.44649351
  0.29900000   0.44649351
  0.29900000   0.44649352
  0.29900000   0.44649352
  0.29900000   0.44649352
  0.29900000   0.44649353
  0.29900000   0.44649353
  0.29900000   0.44649353
  0.29900000   0.44649354
  0.29900000   0.44649354
  0.29900000   0.44649354
  0.29900000   0.44649355
  0.29900000   0.44649355
  0.29900000   0.44649355
  0.29900000   0.44649356
  0.29900000   0.44649356
  0.29900000   0.44649356
  0.29900000   0.44649357
  0.29900000   0.44649357
  0.29900000   0.44649357
  0.29900000   0.44649358
  0.29900000   0.44649358
  0.29900000   0.44649358
  0.29900000   0.44649359
  0.29900000   0.44649359
  0.29900000   0.44649359
  0.29900000   0.44649360
  0.29900000   0.44649360
  0.29900000   0.44649360
  0.29900000   0.44649361
  0.29900000   0.44649361
  0.29900000   0.44649361
  0.29900000   0.44649362
  0.29900000   0.44649362
  0.29900000   0.44649362
  0.29900000   0.44649363
  0.29900000   0.44649363
  0.30000000   0.44721016
  0.30000000   0.44721016
  0.30000000   0.44721016
  0.30000000   0.44721017
  0.30000000   0.44721017
  0.30000000   0.44721017
  0.30000000   0.44721018
  0.30000000   0.44721018
  0.30000000   0.44721018
  0.30000000   0.44721019
  0.30000000   0.44721019
  0.30000000   0.44721019
  0.30000000   0.44721020
  0.30000000   0.44721020
  0.30000000   0.44721020
  0.30000000   0.44721021
  0.30000000   0.44721021
  0.30000000   0.44721021
  0.30000000   0.44721022
  0.30000000   0.44721022
  0.30000000   0.44721022
  0.30000000   0.44721023
  0.30000000   0.44721023
  0.30000000   0.44721023
  0.30000000   0.44721024
  0.30000000   0.44721024
  0.30000000   0.44721024
  0.30000000   0.44721025
  0.30000000   0.44721025
  0.30000000   0.44721025
  0.30000000   0.44721026
  0.30000000   0.44721026
  0.30000000   0.44721026
  0.30000000   0.44721027
  0.30000000   0.44721027
  0.30000000   0.44721027
  0.30000000   0.44721028
  0.30000000   0.44721028
  0.30000000   0.44721028
  0.30000000   0.44721029
  0.30100000   0.44792452
  0.30100000   0.44792453
  0.30100000   0.44792453
  0.30100000   0.44792453
  0.30100000   0.44792454
  0.30100000   0.44792454
  0.30100000   0.44792454
  0.30100000   0.44792455
  0.30100000   0.44792455
  0.30100000   0.44792455
  0.30100000   0.44792456
  0.30100000   0.44792456
  0.30100000   0.44792456
  0.30100000   0.44792457
  0.30100000   0.44792457
  0.30100000   0.44792457
  0.30100000   0.44792458
  0.30100000   0.44792458
  0.30100000   0.44792459
  0.30100000   0.44792459
  0.30100000   0.44792459
  0.30100000   0.44792460
  0.30100000   0.44792460
  0.30100000   0.44792460
  0.30100000   0.44792461
  0.30100000   0.44792461
  0.30100000   0.44792461
  0.30100000   0.44792462
  0.30100000   0.44792462
  0.30100000   0.44792462
  0.30100000   0.44792463
  0.30100000   0.44792463
  0.30100000   0.44792463
  0.30100000   0.44792464
  0.30100000   0.44792464
  0.30100000   0.44792464
  0.30100000   0.44792465
  0.30100000   0.44792465
  0.30100000   0.44792465
  0.30100000   0.44792466
  0.30200000   0.44863661
  0.30200000   0.44863662
  0.30200000   0.44863662
  0.30200000   0.44863662
  0.30200000   0.44863663
  0.30200000   0.44863663
  0.30200000   0.44863663
  0.30200000   0.44863664
  0.30200000   0.44863664
  0.30200000   0.44863665
  0.30200000   0.44863665
  0.30200000   0.44863665
  0.30200000   0.44863666
  0.30200000   0.44863666
  0.30200000   0.44863666
  0.30200000   0.44863667
  0.30200000   0.44863667
  0.30200000   0.44863667
  0.30200000   0.44863668
  0.30200000   0.44863668
  0.30200000   0.44863668
  0.30200000   0.44863669
  0.30200000   0.44863669
  0.30200000   0.44863669
  0.30200000   0.44863670
  0.30200000   0.44863670
  0.30200000   0.44863670
  0.30200000   0.44863671
  0.30200000   0.44863671
  0.30200000   0.44863671
  0.30200000   0.44863672
  0.30200000   0.44863672
  0.30200000   0.44863672
  0.30200000   0.44863673
  0.30200000   0.44863673
  0.30200000   0.44863673
  0.30200000   0.44863674
  0.30200000   0.44863674
  0.30200000   0.44863674
  0.30200000   0.44863675
  0.30300000   0.44934644
  0.30300000   0.44934645
  0.30300000   0.44934645
  0.30300000   0.44934645
  0.30300000   0.44934646
  0.30300000   0.44934646
  0.30300000   0.44934646
  0.30300000   0.44934647
  0.30300000   0.44934647
  0.30300000   0.44934647
  0.30300000   0.44934648
  0.30300000   0.44934648
  0.30300000   0.44934648
  0.30300000   0.44934649
  0.30300000   0.44934649
  0.30300000   0.44934650
  0.30300000   0.44934650
  0.30300000   0.44934650
  0.30300000   0.44934651
  0.30300000   0.44934651
  0.30300000   0.44934651
  0.30300000   0.44934652
  0.30300000   0.44934652
  0.30300000   0.44934652
  0.30300000   0.44934653
  0.30300000   0.44934653
  0.30300000   0.44934653
  0.30300000   0.44934654
  0.30300000   0.44934654
  0.30300000   0.44934654
  0.30300000   0.44934655
  0.30300000   0.44934655
  0.30300000   0.44934655
  0.30300000   0.44934656
  0.30300000   0.44934656
  0.30300000   0.44934656
  0.30300000   0.44934657
  0.30300000   0.44934657
  0.30300000   0.44934657
  0.30300000   0.44934658
  0.30400000   0.45005402
  0.30400000   0.45005403
  0.30400000   0.45005403
  0.30400000   0.45005403
  0.30400000   0.45005404
  0.30400000   0.45005404
  0.30400000   0.45005404
  0.30400000   0.45005405
  0.30400000   0.45005405
  0.30400000   0.45005405
  0.30400000   0.45005406
  0.30400000   0.45005406
  0.30400000   0.45005407
  0.30400000   0.45005407
  0.30400000   0.45005407
  0.30400000   0.45005408
  0.30400000   0.45005408
  0.30400000   0.45005408
  0.30400000   0.45005409
  0.30400000   0.45005409
  0.30400000   0.45005409
  0.30400000   0.45005410
  0.30400000   0.45005410
  0.30400000   0.45005410
  0.30400000   0.45005411
  0.30400000   0.45005411
  0.30400000   0.45005411
  0.30400000   0.45005412
  0.30400000   0.45005412
  0.30400000   0.45005412
  0.30400000   0.45005413
  0.30400000   0.45005413
  0.30400000   0.45005414
  0.30400000   0.45005414
  0.30400000   0.45005414
  0.30400000   0.45005415
  0.30400000   0.45005415
  0.30400000   0.45005415
  0.30400000   0.45005416
  0.30400000   0.45005416
  0.30500000   0.45075937
  0.30500000   0.45075937
  0.30500000   0.45075937
  0.30500000   0.45075938
  0.30500000   0.45075938
  0.30500000   0.45075938
  0.30500000   0.45075939
  0.30500000   0.45075939
  0.30500000   0.45075940
  0.30500000   0.45075940
  0.30500000   0.45075940
  0.30500000   0.45075941
  0.30500000   0.45075941
  0.30500000   0.45075941
  0.30500000   0.45075942
  0.30500000   0.45075942
  0.30500000   0.45075942
  0.30500000   0.45075943
  0.30500000   0.45075943
  0.30500000   0.45075943
  0.30500000   0.45075944
  0.30500000   0.45075944
  0.30500000   0.45075945
  0.30500000   0.45075945
  0.30500000   0.45075945
  0.30500000   0.45075946
  0.30500000   0.45075946
  0.30500000   0.45075946
  0.30500000   0.45075947
  0.30500000   0.45075947
  0.30500000   0.45075947
  0.30500000   0.45075948
  0.30500000   0.45075948
  0.30500000   0.45075948
  0.30500000   0.45075949
  0.30500000   0.45075949
  0.30500000   0.45075949
  0.30500000   0.45075950
  0.30500000   0.45075950
  0.30500000   0.45075950
  0.30600000   0.45146249
  0.30600000   0.45146249
  0.30600000   0.45146250
  0.30600000   0.45146250
  0.30600000   0.45146250
  0.30600000   0.45146251
  0.30600000   0.45146251
  0.30600000   0.45146251
  0.30600000   0.45146252
  0.30600000   0.45146252
  0.30600000   0.45146253
  0.30600000   0.45146253
  0.30600000   0.45146253
  0.30600000   0.45146254
  0.30600000   0.45146254
  0.30600000   0.45146254
  0.30600000   0.45146255
  0.30600000   0.45146255
  0.30600000   0.45146255
  0.30600000   0.45146256
  0.30600000   0.45146256
  0.30600000   0.45146256
  0.30600000   0.45146257
  0.30600000   0.45146257
  0.30600000   0.45146258
  0.30600000   0.45146258
  0.30600000   0.45146258
  0.30600000   0.45146259
  0.30600000   0.45146259
  0.30600000   0.45146259
  0.30600000   0.45146260
  0.30600000   0.45146260
  0.30600000   0.45146260
  0.30600000   0.45146261
  0.30600000   0.45146261
  0.30600000   0.45146261
  0.30600000   0.45146262
  0.30600000   0.45146262
  0.30600000   0.45146262
  0.30600000   0.45146263
  0.30700000   0.45216340
  0.30700000   0.45216340
  0.30700000   0.45216341
  0.30700000   0.45216341
  0.30700000   0.45216342
  0.30700000   0.45216342
  0.30700000   0.45216342
  0.30700000   0.45216343
  0.30700000   0.45216343
  0.30700000   0.45216343
  0.30700000   0.45216344
  0.30700000   0.45216344
  0.30700000   0.45216345
  0.30700000   0.45216345
  0.30700000   0.45216345
  0.30700000   0.45216346
  0.30700000   0.45216346
  0.30700000   0.45216346
  0.30700000   0.45216347
  0.30700000   0.45216347
  0.30700000   0.45216347
  0.30700000   0.45216348
  0.30700000   0.45216348
  0.30700000   0.45216349
  0.30700000   0.45216349
  0.30700000   0.45216349
  0.30700000   0.45216350
  0.30700000   0.45216350
  0.30700000   0.45216350
  0.30700000   0.45216351
  0.30700000   0.45216351
  0.30700000   0.45216351
  0.30700000   0.45216352
  0.30700000   0.45216352
  0.30700000   0.45216352
  0.30700000   0.45216353
  0.30700000   0.45216353
  0.30700000   0.45216353
  0.30700000   0.45216354
  0.30700000   0.45216354
  0.30800000   0.45286212
  0.30800000   0.45286212
  0.30800000   0.45286212
  0.30800000   0.45286213
  0.30800000   0.45286213
  0.30800000   0.45286214
  0.30800000   0.45286214
  0.30800000   0.45286214
  0.30800000   0.45286215
  0.30800000   0.45286215
  0.30800000   0.45286215
  0.30800000   0.45286216
  0.30800000   0.45286216
  0.30800000   0.45286217
  0.30800000   0.45286217
  0.30800000   0.45286217
  0.30800000   0.45286218
  0.30800000   0.45286218
  0.30800000   0.45286218
  0.30800000   0.45286219
  0.30800000   0.45286219
  0.30800000   0.45286220
  0.30800000   0.45286220
  0.30800000   0.45286220
  0.30800000   0.45286221
  0.30800000   0.45286221
  0.30800000   0.45286221
  0.30800000   0.45286222
  0.30800000   0.45286222
  0.30800000   0.45286222
  0.30800000   0.45286223
  0.30800000   0.45286223
  0.30800000   0.45286223
  0.30800000   0.45286224
  0.30800000   0.45286224
  0.30800000   0.45286225
  0.30800000   0.45286225
  0.30800000   0.45286225
  0.30800000   0.45286226
  0.30800000   0.45286226
  0.30900000   0.45355865
  0.30900000   0.45355865
  0.30900000   0.45355866
  0.30900000   0.45355866
  0.30900000   0.45355867
  0.30900000   0.45355867
  0.30900000   0.45355867
  0.30900000   0.45355868
  0.30900000   0.45355868
  0.30900000   0.45355868
  0.30900000   0.45355869
  0.30900000   0.45355869
  0.30900000   0.45355870
  0.30900000   0.45355870
  0.30900000   0.45355870
  0.30900000   0.45355871
  0.30900000   0.45355871
  0.30900000   0.45355871
  0.30900000   0.45355872
  0.30900000   0.45355872
  0.30900000   0.45355872
  0.30900000   0.45355873
  0.30900000   0.45355873
  0.30900000   0.45355874
  0.30900000   0.45355874
  0.30900000   0.45355874
  0.30900000   0.45355875
  0.30900000   0.45355875
  0.30900000   0.45355875
  0.30900000   0.45355876
  0.30900000   0.45355876
  0.30900000   0.45355876
  0.30900000   0.45355877
  0.30900000   0.45355877
  0.30900000   0.45355878
  0.30900000   0.45355878
  0.30900000   0.45355878
  0.30900000   0.45355879
  0.30900000   0.45355879
  0.30900000   0.45355879
  0.31000000   0.45425301
  0.31000000   0.45425302
  0.31000000   0.45425302
  0.31000000   0.45425302
  0.31000000   0.45425303
  0.31000000   0.45425303
  0.31000000   0.45425303
  0.31000000   0.45425304
  0.31000000   0.45425304
  0.31000000   0.45425305
  0.31000000   0.45425305
  0.31000000   0.45425305
  0.31000000   0.45425306
  0.31000000   0.45425306
  0.31000000   0.45425306
  0.31000000   0.45425307
  0.31000000   0.45425307
  0.31000000   0.45425308
  0.31000000   0.45425308
  0.31000000   0.45425308
  0.31000000   0.45425309
  0.31000000   0.45425309
  0.31000000   0.45425309
  0.31000000   0.45425310
  0.31000000   0.45425310
  0.31000000   0.45425311
  0.31000000   0.45425311
  0.31000000   0.45425311
  0.31000000   0.45425312
  0.31000000   0.45425312
  0.31000000   0.45425312
  0.31000000   0.45425313
  0.31000000   0.45425313
  0.31000000   0.45425313
  0.31000000   0.45425314
  0.31000000   0.45425314
  0.31000000   0.45425315
  0.31000000   0.45425315
  0.31000000   0.45425315
  0.31000000   0.45425316
  0.31100000   0.45494522
  0.31100000   0.45494522
  0.31100000   0.45494522
  0.31100000   0.45494523
  0.31100000   0.45494523
  0.31100000   0.45494523
  0.31100000   0.45494524
  0.31100000   0.45494524
  0.31100000   0.45494525
  0.31100000   0.45494525
  0.31100000   0.45494525
  0.31100000   0.45494526
  0.31100000   0.45494526
  0.31100000   0.45494526
  0.31100000   0.45494527
  0.31100000   0.45494527
  0.31100000   0.45494528
  0.31100000   0.45494528
  0.31100000   0.45494528
  0.31100000   0.45494529
  0.31100000   0.45494529
  0.31100000   0.45494529
  0.31100000   0.45494530
  0.31100000   0.45494530
  0.31100000   0.45494531
  0.31100000   0.45494531
  0.31100000   0.45494531
  0.31100000   0.45494532
  0.31100000   0.45494532
  0.31100000   0.45494532
  0.31100000   0.45494533
  0.31100000   0.45494533
  0.31100000   0.45494534
  0.31100000   0.45494534
  0.31100000   0.45494534
  0.31100000   0.45494535
  0.31100000   0.45494535
  0.31100000   0.45494535
  0.31100000   0.45494536
  0.31100000   0.45494536
  0.31200000   0.45563527
  0.31200000   0.45563528
  0.31200000   0.45563528
  0.31200000   0.45563528
  0.31200000   0.45563529
  0.31200000   0.45563529
  0.31200000   0.45563530
  0.31200000   0.45563530
  0.31200000   0.45563530
  0.31200000   0.45563531
  0.31200000   0.45563531
  0.31200000   0.45563532
  0.31200000   0.45563532
  0.31200000   0.45563532
  0.31200000   0.45563533
  0.31200000   0.45563533
  0.31200000   0.45563533
  0.31200000   0.45563534
  0.31200000   0.45563534
  0.31200000   0.45563535
  0.31200000   0.45563535
  0.31200000   0.45563535
  0.31200000   0.45563536
  0.31200000   0.45563536
  0.31200000   0.45563536
  0.31200000   0.45563537
  0.31200000   0.45563537
  0.31200000   0.45563538
  0.31200000   0.45563538
  0.31200000   0.45563538
  0.31200000   0.45563539
  0.31200000   0.45563539
  0.31200000   0.45563539
  0.31200000   0.45563540
  0.31200000   0.45563540
  0.31200000   0.45563540
  0.31200000   0.45563541
  0.31200000   0.45563541
  0.31200000   0.45563542
  0.31200000   0.45563542
  0.31300000   0.45632320
  0.31300000   0.45632320
  0.31300000   0.45632320
  0.31300000   0.45632321
  0.31300000   0.45632321
  0.31300000   0.45632322
  0.31300000   0.45632322
  0.31300000   0.45632322
  0.31300000   0.45632323
  0.31300000   0.45632323
  0.31300000   0.45632324
  0.31300000   0.45632324
  0.31300000   0.45632324
  0.31300000   0.45632325
  0.31300000   0.45632325
  0.31300000   0.45632325
  0.31300000   0.45632326
  0.31300000   0.45632326
  0.31300000   0.45632327
  0.31300000   0.45632327
  0.31300000   0.45632327
  0.31300000   0.45632328
  0.31300000   0.45632328
  0.31300000   0.45632328
  0.31300000   0.45632329
  0.31300000   0.45632329
  0.31300000   0.45632330
  0.31300000   0.45632330
  0.31300000   0.45632330
  0.31300000   0.45632331
  0.31300000   0.45632331
  0.31300000   0.45632331
  0.31300000   0.45632332
  0.31300000   0.45632332
  0.31300000   0.45632333
  0.31300000   0.45632333
  0.31300000   0.45632333
  0.31300000   0.45632334
  0.31300000   0.45632334
  0.31300000   0.45632334
  0.31400000   0.45700900
  0.31400000   0.45700900
  0.31400000   0.45700901
  0.31400000   0.45700901
  0.31400000   0.45700901
  0.31400000   0.45700902
  0.31400000   0.45700902
  0.31400000   0.45700903
  0.31400000   0.45700903
  0.31400000   0.45700903
  0.31400000   0.45700904
  0.31400000   0.45700904
  0.31400000   0.45700905
  0.31400000   0.45700905
  0.31400000   0.45700905
  0.31400000   0.45700906
  0.31400000   0.45700906
  0.31400000   0.45700907
  0.31400000   0.45700907
  0.31400000   0.45700907
  0.31400000   0.45700908
  0.31400000   0.45700908
  0.31400000   0.45700908
  0.31400000   0.45700909
  0.31400000   0.45700909
  0.31400000   0.45700910
  0.31400000   0.45700910
  0.31400000   0.45700910
  0.31400000   0.45700911
  0.31400000   0.45700911
  0.31400000   0.45700911
  0.31400000   0.45700912
  0.31400000   0.45700912
  0.31400000   0.45700913
  0.31400000   0.45700913
  0.31400000   0.45700913
  0.31400000   0.45700914
  0.31400000   0.45700914
  0.31400000   0.45700914
  0.31400000   0.45700915
  0.31500000   0.45769269
  0.31500000   0.45769270
  0.31500000   0.45769270
  0.31500000   0.45769270
  0.31500000   0.45769271
  0.31500000   0.45769271
  0.31500000   0.45769272
  0.31500000   0.45769272
  0.31500000   0.45769272
  0.31500000   0.45769273
  0.31500000   0.45769273
  0.31500000   0.45769274
  0.31500000   0.45769274
  0.31500000   0.45769274
  0.31500000   0.45769275
  0.31500000   0.45769275
  0.31500000   0.45769275
  0.31500000   0.45769276
  0.31500000   0.45769276
  0.31500000   0.45769277
  0.31500000   0.45769277
  0.31500000   0.45769277
  0.31500000   0.45769278
  0.31500000   0.45769278
  0.31500000   0.45769279
  0.31500000   0.45769279
  0.31500000   0.45769279
  0.31500000   0.45769280
  0.31500000   0.45769280
  0.31500000   0.45769280
  0.31500000   0.45769281
  0.31500000   0.45769281
  0.31500000   0.45769282
  0.31500000   0.45769282
  0.31500000   0.45769282
  0.31500000   0.45769283
  0.31500000   0.45769283
  0.31500000   0.45769283
  0.31500000   0.45769284
  0.31500000   0.45769284
  0.31600000   0.45837429
  0.31600000   0.45837429
  0.31600000   0.45837430
  0.31600000   0.45837430
  0.31600000   0.45837430
  0.31600000   0.45837431
  0.31600000   0.45837431
  0.31600000   0.45837432
  0.31600000   0.45837432
  0.31600000   0.45837432
  0.31600000   0.45837433
  0.31600000   0.45837433
  0.31600000   0.45837434
  0.31600000   0.45837434
  0.31600000   0.45837434
  0.31600000   0.45837435
  0.31600000   0.45837435
  0.31600000   0.45837436
  0.31600000   0.45837436
  0.31600000   0.45837436
  0.31600000   0.45837437
  0.31600000   0.45837437
  0.31600000   0.45837437
  0.31600000   0.45837438
  0.31600000   0.45837438
  0.31600000   0.45837439
  0.31600000   0.45837439
  0.31600000   0.45837439
  0.31600000   0.45837440
  0.31600000   0.45837440
  0.31600000   0.45837440
  0.31600000   0.45837441
  0.31600000   0.45837441
  0.31600000   0.45837442
  0.31600000   0.45837442
  0.31600000   0.45837442
  0.31600000   0.45837443
  0.31600000   0.45837443
  0.31600000   0.45837443
  0.31600000   0.45837444
  0.31700000   0.45905380
  0.31700000   0.45905380
  0.31700000   0.45905381
  0.31700000   0.45905381
  0.31700000   0.45905381
  0.31700000   0.45905382
  0.31700000   0.45905382
  0.31700000   0.45905383
  0.31700000   0.45905383
  0.31700000   0.45905383
  0.31700000   0.45905384
  0.31700000   0.45905384
  0.31700000   0.45905385
  0.31700000   0.45905385
  0.31700000   0.45905385
  0.31700000   0.45905386
  0.31700000   0.45905386
  0.31700000   0.45905387
  0.31700000   0.45905387
  0.31700000   0.45905387
  0.31700000   0.45905388
  0.31700000   0.45905388
  0.31700000   0.45905389
  0.31700000   0.45905389
  0.31700000   0.45905389
  0.31700000   0.45905390
  0.31700000   0.45905390
  0.31700000   0.45905390
  0.31700000   0.45905391
  0.31700000   0.45905391
  0.31700000   0.45905392
  0.31700000   0.45905392
  0.31700000   0.45905392
  0.31700000   0.45905393
  0.31700000   0.45905393
  0.31700000   0.45905394
  0.31700000   0.45905394
  0.31700000   0.45905394
  0.31700000   0.45905395
  0.31700000   0.45905395
  0.31800000   0.45973124
  0.31800000   0.45973124
  0.31800000   0.45973124
  0.31800000   0.45973125
  0.31800000   0.45973125
  0.31800000   0.45973126
  0.31800000   0.45973126
  0.31800000   0.45973126
  0.31800000   0.45973127
  0.31800000   0.45973127
  0.31800000   0.45973128
  0.31800000   0.45973128
  0.31800000   0.45973128
  0.31800000   0.45973129
  0.31800000   0.45973129
  0.31800000   0.45973130
  0.31800000   0.45973130
  0.31800000   0.45973130
  0.31800000   0.45973131
  0.31800000   0.45973131
  0.31800000   0.45973132
  0.31800000   0.45973132
  0.31800000   0.45973132
  0.31800000   0.45973133
  0.31800000   0.45973133
  0.31800000   0.45973133
  0.31800000   0.45973134
  0.31800000   0.45973134
  0.31800000   0.45973135
  0.31800000   0.45973135
  0.31800000   0.45973135
  0.31800000   0.45973136
  0.31800000   0.45973136
  0.31800000   0.45973137
  0.31800000   0.45973137
  0.31800000   0.45973137
  0.31800000   0.45973138
  0.31800000   0.45973138
  0.31800000   0.45973138
  0.31800000   0.45973139
  0.31900000   0.46040661
  0.31900000   0.46040661
  0.31900000   0.46040662
  0.31900000   0.46040662
  0.31900000   0.46040663
  0.31900000   0.46040663
  0.31900000   0.46040663
  0.31900000   0.46040664
  0.31900000   0.46040664
  0.31900000   0.46040665
  0.31900000   0.46040665
  0.31900000   0.46040665
  0.31900000   0.46040666
  0.31900000   0.46040666
  0.31900000   0.46040667
  0.31900000   0.46040667
  0.31900000   0.46040667
  0.31900000   0.46040668
  0.31900000   0.46040668
  0.31900000   0.46040669
  0.31900000   0.46040669
  0.31900000   0.46040669
  0.31900000   0.46040670
  0.31900000   0.46040670
  0.31900000   0.46040671
  0.31900000   0.46040671
  0.31900000   0.46040671
  0.31900000   0.46040672
  0.31900000   0.46040672
  0.31900000   0.46040673
  0.31900000   0.46040673
  0.31900000   0.46040673
  0.31900000   0.46040674
  0.31900000   0.46040674
  0.31900000   0.46040674
  0.31900000   0.46040675
  0.31900000   0.46040675
  0.31900000   0.46040676
  0.31900000   0.46040676
  0.31900000   0.46040676
  0.32000000   0.46107993
  0.32000000   0.46107994
  0.32000000   0.46107994
  0.32000000   0.46107995
  0.32000000   0.46107995
  0.32000000   0.46107996
  0.32000000   0.46107996
  0.32000000   0.46107996
  0.32000000   0.46107997
  0.32000000   0.46107997
  0.32000000   0.46107998
  0.32000000   0.46107998
  0.32000000   0.46107998
  0.32000000   0.46107999
  0.32000000   0.46107999
  0.32000000   0.46108000
  0.32000000   0.46108000
  0.32000000   0.46108000
  0.32000000   0.46108001
  0.32000000   0.46108001
  0.32000000   0.46108002
  0.32000000   0.46108002
  0.32000000   0.46108002
  0.32000000   0.46108003
  0.32000000   0.46108003
  0.32000000   0.46108004
  0.32000000   0.46108004
  0.32000000   0.46108004
  0.32000000   0.46108005
  0.32000000   0.46108005
  0.32000000   0.46108005
  0.32000000   0.46108006
  0.32000000   0.46108006
  0.32000000   0.46108007
  0.32000000   0.46108007
  0.32000000   0.46108007
  0.32000000   0.46108008
  0.32000000   0.46108008
  0.32000000   0.46108009
  0.32000000   0.46108009
  0.32100000   0.46175122
  0.32100000   0.46175122
  0.32100000   0.46175123
  0.32100000   0.46175123
  0.32100000   0.46175124
  0.32100000   0.46175124
  0.32100000   0.46175125
  0.32100000   0.46175125
  0.32100000   0.46175125
  0.32100000   0.46175126
  0.32100000   0.46175126
  0.32100000   0.46175127
  0.32100000   0.46175127
  0.32100000   0.46175127
  0.32100000   0.46175128
  0.32100000   0.46175128
  0.32100000   0.46175129
  0.32100000   0.46175129
  0.32100000   0.46175129
  0.32100000   0.46175130
  0.32100000   0.46175130
  0.32100000   0.46175131
  0.32100000   0.46175131
  0.32100000   0.46175131
  0.32100000   0.46175132
  0.32100000   0.46175132
  0.32100000   0.46175133
  0.32100000   0.46175133
  0.32100000   0.46175133
  0.32100000   0.46175134
  0.32100000   0.46175134
  0.32100000   0.46175135
  0.32100000   0.46175135
  0.32100000   0.46175135
  0.32100000   0.46175136
  0.32100000   0.46175136
  0.32100000   0.46175136
  0.32100000   0.46175137
  0.32100000   0.46175137
  0.32100000   0.46175138
  0.32200000   0.46242048
  0.32200000   0.46242048
  0.32200000   0.46242049
  0.32200000   0.46242049
  0.32200000   0.46242049
  0.32200000   0.46242050
  0.32200000   0.46242050
  0.32200000   0.46242051
  0.32200000   0.46242051
  0.32200000   0.46242052
  0.32200000   0.46242052
  0.32200000   0.46242052
  0.32200000   0.46242053
  0.32200000   0.46242053
  0.32200000   0.46242054
  0.32200000   0.46242054
  0.32200000   0.46242054
  0.32200000   0.46242055
  0.32200000   0.46242055
  0.32200000   0.46242056
  0.32200000   0.46242056
  0.32200000   0.46242056
  0.32200000   0.46242057
  0.32200000   0.46242057
  0.32200000   0.46242058
  0.32200000   0.46242058
  0.32200000   0.46242058
  0.32200000   0.46242059
  0.32200000   0.46242059
  0.32200000   0.46242060
  0.32200000   0.46242060
  0.32200000   0.46242060
  0.32200000   0.46242061
  0.32200000   0.46242061
  0.32200000   0.46242062
  0.32200000   0.46242062
  0.32200000   0.46242062
  0.32200000   0.46242063
  0.32200000   0.46242063
  0.32200000   0.46242064
  0.32300000   0.46308772
  0.32300000   0.46308772
  0.32300000   0.46308773
  0.32300000   0.46308773
  0.32300000   0.46308774
  0.32300000   0.46308774
  0.32300000   0.46308775
  0.32300000   0.46308775
  0.32300000   0.46308775
  0.32300000   0.46308776
  0.32300000   0.46308776
  0.32300000   0.46308777
  0.32300000   0.46308777
  0.32300000   0.46308777
  0.32300000   0.46308778
  0.32300000   0.46308778
  0.32300000   0.46308779
  0.32300000   0.46308779
  0.32300000   0.46308779
  0.32300000   0.46308780
  0.32300000   0.46308780
  0.32300000   0.46308781
  0.32300000   0.46308781
  0.32300000   0.46308781
  0.32300000   0.46308782
  0.32300000   0.46308782
  0.32300000   0.46308783
  0.32300000   0.46308783
  0.32300000   0.46308783
  0.32300000   0.46308784
  0.32300000   0.46308784
  0.32300000   0.46308785
  0.32300000   0.46308785
  0.32300000   0.46308785
  0.32300000   0.46308786
  0.32300000   0.46308786
  0.32300000   0.46308787
  0.32300000   0.46308787
  0.32300000   0.46308787
  0.32300000   0.46308788
  0.32400000   0.46375296
  0.32400000   0.46375296
  0.32400000   0.46375297
  0.32400000   0.46375297
  0.32400000   0.46375297
  0.32400000   0.46375298
  0.32400000   0.46375298
  0.32400000   0.46375299
  0.32400000   0.46375299
  0.32400000   0.46375299
  0.32400000   0.46375300
  0.32400000   0.46375300
  0.32400000   0.46375301
  0.32400000   0.46375301
  0.32400000   0.46375302
  0.32400000   0.46375302
  0.32400000   0.46375302
  0.32400000   0.46375303
  0.32400000   0.46375303
  0.32400000   0.46375304
  0.32400000   0.46375304
  0.32400000   0.46375304
  0.32400000   0.46375305
  0.32400000   0.46375305
  0.32400000   0.46375306
  0.32400000   0.46375306
  0.32400000   0.46375306
  0.32400000   0.46375307
  0.32400000   0.46375307
  0.32400000   0.46375308
  0.32400000   0.46375308
  0.32400000   0.46375308
  0.32400000   0.46375309
  0.32400000   0.46375309
  0.32400000   0.46375310
  0.32400000   0.46375310
  0.32400000   0.46375310
  0.32400000   0.46375311
  0.32400000   0.46375311
  0.32400000   0.46375312
  0.32500000   0.46441620
  0.32500000   0.46441620
  0.32500000   0.46441621
  0.32500000   0.46441621
  0.32500000   0.46441622
  0.32500000   0.46441622
  0.32500000   0.46441622
  0.32500000   0.46441623
  0.32500000   0.46441623
  0.32500000   0.46441624
  0.32500000   0.46441624
  0.32500000   0.46441625
  0.32500000   0.46441625
  0.32500000   0.46441625
  0.32500000   0.46441626
  0.32500000   0.46441626
  0.32500000   0.46441627
  0.32500000   0.46441627
  0.32500000   0.46441627
  0.32500000   0.46441628
  0.32500000   0.46441628
  0.32500000   0.46441629
  0.32500000   0.46441629
  0.32500000   0.46441630
  0.32500000   0.46441630
  0.32500000   0.46441630
  0.32500000   0.46441631
  0.32500000   0.46441631
  0.32500000   0.46441632
  0.32500000   0.46441632
  0.32500000   0.46441632
  0.32500000   0.46441633
  0.32500000   0.46441633
  0.32500000   0.46441634
  0.32500000   0.46441634
  0.32500000   0.46441634
  0.32500000   0.46441635
  0.32500000   0.46441635
  0.32500000   0.46441636
  0.32500000   0.46441636
  0.32600000   0.46507746
  0.32600000   0.46507746
  0.32600000   0.46507747
  0.32600000   0.46507747
  0.32600000   0.46507748
  0.32600000   0.46507748
  0.32600000   0.46507748
  0.32600000   0.46507749
  0.32600000   0.46507749
  0.32600000   0.46507750
  0.32600000   0.46507750
  0.32600000   0.46507751
  0.32600000   0.46507751
  0.32600000   0.46507751
  0.32600000   0.46507752
  0.32600000   0.46507752
  0.32600000   0.46507753
  0.32600000   0.46507753
  0.32600000   0.46507754
  0.32600000   0.46507754
  0.32600000   0.46507754
  0.32600000   0.46507755
  0.32600000   0.46507755
  0.32600000   0.46507756
  0.32600000   0.46507756
  0.32600000   0.46507756
  0.32600000   0.46507757
  0.32600000   0.46507757
  0.32600000   0.46507758
  0.32600000   0.46507758
  0.32600000   0.46507758
  0.32600000   0.46507759
  0.32600000   0.46507759
  0.32600000   0.46507760
  0.32600000   0.46507760
  0.32600000   0.46507760
  0.32600000   0.46507761
  0.32600000   0.46507761
  0.32600000   0.46507762
  0.32600000   0.46507762
  0.32700000   0.46573675
  0.32700000   0.46573675
  0.32700000   0.46573676
  0.32700000   0.46573676
  0.32700000   0.46573676
  0.32700000   0.46573677
  0.32700000   0.46573677
  0.32700000   0.46573678
  0.32700000   0.46573678
  0.32700000   0.46573679
  0.32700000   0.46573679
  0.32700000   0.46573679
  0.32700000   0.46573680
  0.32700000   0.46573680
  0.32700000   0.46573681
  0.32700000   0.46573681
  0.32700000   0.46573681
  0.32700000   0.46573682
  0.32700000   0.46573682
  0.32700000   0.46573683
  0.32700000   0.46573683
  0.32700000   0.46573684
  0.32700000   0.46573684
  0.32700000   0.46573684
  0.32700000   0.46573685
  0.32700000   0.46573685
  0.32700000   0.46573686
  0.32700000   0.46573686
  0.32700000   0.46573686
  0.32700000   0.46573687
  0.32700000   0.46573687
  0.32700000   0.46573688
  0.32700000   0.46573688
  0.32700000   0.46573688
  0.32700000   0.46573689
  0.32700000   0.46573689
  0.32700000   0.46573690
  0.32700000   0.46573690
  0.32700000   0.46573690
  0.32700000   0.46573691
  0.32800000   0.46639407
  0.32800000   0.46639408
  0.32800000   0.46639408
  0.32800000   0.46639409
  0.32800000   0.46639409
  0.32800000   0.46639409
  0.32800000   0.46639410
  0.32800000   0.46639410
  0.32800000   0.46639411
  0.32800000   0.46639411
  0.32800000   0.46639412
  0.32800000   0.46639412
  0.32800000   0.46639412
  0.32800000   0.46639413
  0.32800000   0.46639413
  0.32800000   0.46639414
  0.32800000   0.46639414
  0.32800000   0.46639415
  0.32800000   0.46639415
  0.32800000   0.46639415
  0.32800000   0.46639416
  0.32800000   0.46639416
  0.32800000   0.46639417
  0.32800000   0.46639417
  0.32800000   0.46639417
  0.32800000   0.46639418
  0.32800000   0.46639418
  0.32800000   0.46639419
  0.32800000   0.46639419
  0.32800000   0.46639420
  0.32800000   0.46639420
  0.32800000   0.46639420
  0.32800000   0.46639421
  0.32800000   0.46639421
  0.32800000   0.46639422
  0.32800000   0.46639422
  0.32800000   0.46639422
  0.32800000   0.46639423
  0.32800000   0.46639423
  0.32800000   0.46639424
  0.32900000   0.46704945
  0.32900000   0.46704945
  0.32900000   0.46704946
  0.32900000   0.46704946
  0.32900000   0.46704947
  0.32900000   0.46704947
  0.32900000   0.46704947
  0.32900000   0.46704948
  0.32900000   0.46704948
  0.32900000   0.46704949
  0.32900000   0.46704949
  0.32900000   0.46704950
  0.32900000   0.46704950
  0.32900000   0.46704950
  0.32900000   0.46704951
  0.32900000   0.46704951
  0.32900000   0.46704952
  0.32900000   0.46704952
  0.32900000   0.46704953
  0.32900000   0.46704953
  0.32900000   0.46704953
  0.32900000   0.46704954
  0.32900000   0.46704954
  0.32900000   0.46704955
  0.32900000   0.46704955
  0.32900000   0.46704955
  0.32900000   0.46704956
  0.32900000   0.46704956
  0.32900000   0.46704957
  0.32900000   0.46704957
  0.32900000   0.46704958
  0.32900000   0.46704958
  0.32900000   0.46704958
  0.32900000   0.46704959
  0.32900000   0.46704959
  0.32900000   0.46704960
  0.32900000   0.46704960
  0.32900000   0.46704960
  0.32900000   0.46704961
  0.32900000   0.46704961
  0.33000000   0.46770288
  0.33000000   0.46770289
  0.33000000   0.46770289
  0.33000000   0.46770290
  0.33000000   0.46770290
  0.33000000   0.46770291
  0.33000000   0.46770291
  0.33000000   0.46770291
  0.33000000   0.46770292
  0.33000000   0.46770292
  0.33000000   0.46770293
  0.33000000   0.46770293
  0.33000000   0.46770294
  0.33000000   0.46770294
  0.33000000   0.46770294
  0.33000000   0.46770295
  0.33000000   0.46770295
  0.33000000   0.46770296
  0.33000000   0.46770296
  0.33000000   0.46770297
  0.33000000   0.46770297
  0.33000000   0.46770297
  0.33000000   0.46770298
  0.33000000   0.46770298
  0.33000000   0.46770299
  0.33000000   0.46770299
  0.33000000   0.46770299
  0.33000000   0.46770300
  0.33000000   0.46770300
  0.33000000   0.46770301
  0.33000000   0.46770301
  0.33000000   0.46770302
  0.33000000   0.46770302
  0.33000000   0.46770302
  0.33000000   0.46770303
  0.33000000   0.46770303
  0.33000000   0.46770304
  0.33000000   0.46770304
  0.33000000   0.46770304
  0.33000000   0.46770305
  0.33100000   0.46835439
  0.33100000   0.46835439
  0.33100000   0.46835440
  0.33100000   0.46835440
  0.33100000   0.46835441
  0.33100000   0.46835441
  0.33100000   0.46835442
  0.33100000   0.46835442
  0.33100000   0.46835442
  0.33100000   0.46835443
  0.33100000   0.46835443
  0.33100000   0.46835444
  0.33100000   0.46835444
  0.33100000   0.46835445
  0.33100000   0.46835445
  0.33100000   0.46835445
  0.33100000   0.46835446
  0.33100000   0.46835446
  0.33100000   0.46835447
  0.33100000   0.46835447
  0.33100000   0.46835448
  0.33100000   0.46835448
  0.33100000   0.46835448
  0.33100000   0.46835449
  0.33100000   0.46835449
  0.33100000   0.46835450
  0.33100000   0.46835450
  0.33100000   0.46835451
  0.33100000   0.46835451
  0.33100000   0.46835451
  0.33100000   0.46835452
  0.33100000   0.46835452
  0.33100000   0.46835453
  0.33100000   0.46835453
  0.33100000   0.46835453
  0.33100000   0.46835454
  0.33100000   0.46835454
  0.33100000   0.46835455
  0.33100000   0.46835455
  0.33100000   0.46835455
  0.33200000   0.46900398
  0.33200000   0.46900398
  0.33200000   0.46900398
  0.33200000   0.46900399
  0.33200000   0.46900399
  0.33200000   0.46900400
  0.33200000   0.46900400
  0.33200000   0.46900401
  0.33200000   0.46900401
  0.33200000   0.46900402
  0.33200000   0.46900402
  0.33200000   0.46900402
  0.33200000   0.46900403
  0.33200000   0.46900403
  0.33200000   0.46900404
  0.33200000   0.46900404
  0.33200000   0.46900405
  0.33200000   0.46900405
  0.33200000   0.46900405
  0.33200000   0.46900406
  0.33200000   0.46900406
  0.33200000   0.46900407
  0.33200000   0.46900407
  0.33200000   0.46900408
  0.33200000   0.46900408
  0.33200000   0.46900408
  0.33200000   0.46900409
  0.33200000   0.46900409
  0.33200000   0.46900410
  0.33200000   0.46900410
  0.33200000   0.46900410
  0.33200000   0.46900411
  0.33200000   0.46900411
  0.33200000   0.46900412
  0.33200000   0.46900412
  0.33200000   0.46900413
  0.33200000   0.46900413
  0.33200000   0.46900413
  0.33200000   0.46900414
  0.33200000   0.46900414
  0.33300000   0.46965165
  0.33300000   0.46965166
  0.33300000   0.46965166
  0.33300000   0.46965167
  0.33300000   0.46965167
  0.33300000   0.46965168
  0.33300000   0.46965168
  0.33300000   0.46965168
  0.33300000   0.46965169
  0.33300000   0.46965169
  0.33300000   0.46965170
  0.33300000   0.46965170
  0.33300000   0.46965171
  0.33300000   0.46965171
  0.33300000   0.46965171
  0.33300000   0.46965172
  0.33300000   0.46965172
  0.33300000   0.46965173
  0.33300000   0.46965173
  0.33300000   0.46965174
  0.33300000   0.46965174
  0.33300000   0.46965175
  0.33300000   0.46965175
  0.33300000   0.46965175
  0.33300000   0.46965176
  0.33300000   0.46965176
  0.33300000   0.46965177
  0.33300000   0.46965177
  0.33300000   0.46965177
  0.33300000   0.46965178
  0.33300000   0.46965178
  0.33300000   0.46965179
  0.33300000   0.46965179
  0.33300000   0.46965180
  0.33300000   0.46965180
  0.33300000   0.46965180
  0.33300000   0.46965181
  0.33300000   0.46965181
  0.33300000   0.46965182
  0.33300000   0.46965182
  0.33400000   0.47029743
  0.33400000   0.47029744
  0.33400000   0.47029744
  0.33400000   0.47029745
  0.33400000   0.47029745
  0.33400000   0.47029745
  0.33400000   0.47029746
  0.33400000   0.47029746
  0.33400000   0.47029747
  0.33400000   0.47029747
  0.33400000   0.47029748
  0.33400000   0.47029748
  0.33400000   0.47029749
  0.33400000   0.47029749
  0.33400000   0.47029749
  0.33400000   0.47029750
  0.33400000   0.47029750
  0.33400000   0.47029751
  0.33400000   0.47029751
  0.33400000   0.47029752
  0.33400000   0.47029752
  0.33400000   0.47029752
  0.33400000   0.47029753
  0.33400000   0.47029753
  0.33400000   0.47029754
  0.33400000   0.47029754
  0.33400000   0.47029755
  0.33400000   0.47029755
  0.33400000   0.47029755
  0.33400000   0.47029756
  0.33400000   0.47029756
  0.33400000   0.47029757
  0.33400000   0.47029757
  0.33400000   0.47029758
  0.33400000   0.47029758
  0.33400000   0.47029758
  0.33400000   0.47029759
  0.33400000   0.47029759
  0.33400000   0.47029760
  0.33400000   0.47029760
  0.33500000   0.47094132
  0.33500000   0.47094133
  0.33500000   0.47094133
  0.33500000   0.47094134
  0.33500000   0.47094134
  0.33500000   0.47094135
  0.33500000   0.47094135
  0.33500000   0.47094135
  0.33500000   0.47094136
  0.33500000   0.47094136
  0.33500000   0.47094137
  0.33500000   0.47094137
  0.33500000   0.47094138
  0.33500000   0.47094138
  0.33500000   0.47094139
  0.33500000   0.47094139
  0.33500000   0.47094139
  0.33500000   0.47094140
  0.33500000   0.47094140
  0.33500000   0.47094141
  0.33500000   0.47094141
  0.33500000   0.47094142
  0.33500000   0.47094142
  0.33500000   0.47094142
  0.33500000   0.47094143
  0.33500000   0.47094143
  0.33500000   0.47094144
  0.33500000   0.47094144
  0.33500000   0.47094145
  0.33500000   0.47094145
  0.33500000   0.47094145
  0.33500000   0.47094146
  0.33500000   0.47094146
  0.33500000   0.47094147
  0.33500000   0.47094147
  0.33500000   0.47094148
  0.33500000   0.47094148
  0.33500000   0.47094148
  0.33500000   0.47094149
  0.33500000   0.47094149
  0.33600000   0.47158334
  0.33600000   0.47158334
  0.33600000   0.47158334
  0.33600000   0.47158335
  0.33600000   0.47158335
  0.33600000   0.47158336
  0.33600000   0.47158336
  0.33600000   0.47158337
  0.33600000   0.47158337
  0.33600000   0.47158338
  0.33600000   0.47158338
  0.33600000   0.47158338
  0.33600000   0.47158339
  0.33600000   0.47158339
  0.33600000   0.47158340
  0.33600000   0.47158340
  0.33600000   0.47158341
  0.33600000   0.47158341
  0.33600000   0.47158342
  0.33600000   0.47158342
  0.33600000   0.47158342
  0.33600000   0.47158343
  0.33600000   0.47158343
  0.33600000   0.47158344
  0.33600000   0.47158344
  0.33600000   0.47158345
  0.33600000   0.47158345
  0.33600000   0.47158345
  0.33600000   0.47158346
  0.33600000   0.47158346
  0.33600000   0.47158347
  0.33600000   0.47158347
  0.33600000   0.47158348
  0.33600000   0.47158348
  0.33600000   0.47158348
  0.33600000   0.47158349
  0.33600000   0.47158349
  0.33600000   0.47158350
  0.33600000   0.47158350
  0.33600000   0.47158351
  0.33700000   0.47222348
  0.33700000   0.47222348
  0.33700000   0.47222349
  0.33700000   0.47222349
  0.33700000   0.47222350
  0.33700000   0.47222350
  0.33700000   0.47222351
  0.33700000   0.47222351
  0.33700000   0.47222352
  0.33700000   0.47222352
  0.33700000   0.47222352
  0.33700000   0.47222353
  0.33700000   0.47222353
  0.33700000   0.47222354
  0.33700000   0.47222354
  0.33700000   0.47222355
  0.33700000   0.47222355
  0.33700000   0.47222356
  0.33700000   0.47222356
  0.33700000   0.47222356
  0.33700000   0.47222357
  0.33700000   0.47222357
  0.33700000   0.47222358
  0.33700000   0.47222358
  0.33700000   0.47222359
  0.33700000   0.47222359
  0.33700000   0.47222359
  0.33700000   0.47222360
  0.33700000   0.47222360
  0.33700000   0.47222361
  0.33700000   0.47222361
  0.33700000   0.47222362
  0.33700000   0.47222362
  0.33700000   0.47222362
  0.33700000   0.47222363
  0.33700000   0.47222363
  0.33700000   0.47222364
  0.33700000   0.47222364
  0.33700000   0.47222365
  0.33700000   0.47222365
  0.33800000   0.47286176
  0.33800000   0.47286177
  0.33800000   0.47286177
  0.33800000   0.47286178
  0.33800000   0.47286178
  0.33800000   0.47286179
  0.33800000   0.47286179
  0.33800000   0.47286180
  0.33800000   0.47286180
  0.33800000   0.47286181
  0.33800000   0.47286181
  0.33800000   0.47286181
  0.33800000   0.47286182
  0.33800000   0.47286182
  0.33800000   0.47286183
  0.33800000   0.47286183
  0.33800000   0.47286184
  0.33800000   0.47286184
  0.33800000   0.47286185
  0.33800000   0.47286185
  0.33800000   0.47286185
  0.33800000   0.47286186
  0.33800000   0.47286186
  0.33800000   0.47286187
  0.33800000   0.47286187
  0.33800000   0.47286188
  0.33800000   0.47286188
  0.33800000   0.47286189
  0.33800000   0.47286189
  0.33800000   0.47286189
  0.33800000   0.47286190
  0.33800000   0.47286190
  0.33800000   0.47286191
  0.33800000   0.47286191
  0.33800000   0.47286192
  0.33800000   0.47286192
  0.33800000   0.47286192
  0.33800000   0.47286193
  0.33800000   0.47286193
  0.33800000   0.47286194
  0.33900000   0.47349820
  0.33900000   0.47349821
  0.33900000   0.47349821
  0.33900000   0.47349822
  0.33900000   0.47349822
  0.33900000   0.47349822
  0.33900000   0.47349823
  0.33900000   0.47349823
  0.33900000   0.47349824
  0.33900000   0.47349824
  0.33900000   0.47349825
  0.33900000   0.47349825
  0.33900000   0.47349826
  0.33900000   0.47349826
  0.33900000   0.47349827
  0.33900000   0.47349827
  0.33900000   0.47349827
  0.33900000   0.47349828
  0.33900000   0.47349828
  0.33900000   0.47349829
  0.33900000   0.47349829
  0.33900000   0.47349830
  0.33900000   0.47349830
  0.33900000   0.47349830
  0.33900000   0.47349831
  0.33900000   0.47349831
  0.33900000   0.47349832
  0.33900000   0.47349832
  0.33900000   0.47349833
  0.33900000   0.47349833
  0.33900000   0.47349834
  0.33900000   0.47349834
  0.33900000   0.47349834
  0.33900000   0.47349835
  0.33900000   0.47349835
  0.33900000   0.47349836
  0.33900000   0.47349836
  0.33900000   0.47349837
  0.33900000   0.47349837
  0.33900000   0.47349837
  0.34000000   0.47413280
  0.34000000   0.47413280
  0.34000000   0.47413281
  0.34000000   0.47413281
  0.34000000   0.47413282
  0.34000000   0.47413282
  0.34000000   0.47413283
  0.34000000   0.47413283
  0.34000000   0.47413284
  0.34000000   0.47413284
  0.34000000   0.47413285
  0.34000000   0.47413285
  0.34000000   0.47413285
  0.34000000   0.47413286
  0.34000000   0.47413286
  0.34000000   0.47413287
  0.34000000   0.47413287
  0.34000000   0.47413288
  0.34000000   0.47413288
  0.34000000   0.47413289
  0.34000000   0.47413289
  0.34000000   0.47413289
  0.34000000   0.47413290
  0.34000000   0.47413290
  0.34000000   0.47413291
  0.34000000   0.47413291
  0.34000000   0.47413292
  0.34000000   0.47413292
  0.34000000   0.47413293
  0.34000000   0.47413293
  0.34000000   0.47413293
  0.34000000   0.47413294
  0.34000000   0.47413294
  0.34000000   0.47413295
  0.34000000   0.47413295
  0.34000000   0.47413296
  0.34000000   0.47413296
  0.34000000   0.47413296
  0.34000000   0.47413297
  0.34000000   0.47413297
  0.34100000   0.47476557
  0.34100000   0.47476557
  0.34100000   0.47476558
  0.34100000   0.47476558
  0.34100000   0.47476559
  0.34100000   0.47476559
  0.34100000   0.47476560
  0.34100000   0.47476560
  0.34100000   0.47476560
  0.34100000   0.47476561
  0.34100000   0.47476561
  0.34100000   0.47476562
  0.34100000   0.47476562
  0.34100000   0.47476563
  0.34100000   0.47476563
  0.34100000   0.47476564
  0.34100000   0.47476564
  0.34100000   0.47476565
  0.34100000   0.47476565
  0.34100000   0.47476565
  0.34100000   0.47476566
  0.34100000   0.47476566
  0.34100000   0.47476567
  0.34100000   0.47476567
  0.34100000   0.47476568
  0.34100000   0.47476568
  0.34100000   0.47476569
  0.34100000   0.47476569
  0.34100000   0.47476569
  0.34100000   0.47476570
  0.34100000   0.47476570
  0.34100000   0.47476571
  0.34100000   0.47476571
  0.34100000   0.47476572
  0.34100000   0.47476572
  0.34100000   0.47476573
  0.34100000   0.47476573
  0.34100000   0.47476573
  0.34100000   0.47476574
  0.34100000   0.47476574
  0.34200000   0.47539652
  0.34200000   0.47539652
  0.34200000   0.47539653
  0.34200000   0.47539653
  0.34200000   0.47539654
  0.34200000   0.47539654
  0.34200000   0.47539654
  0.34200000   0.47539655
  0.34200000   0.47539655
  0.34200000   0.47539656
  0.34200000   0.47539656
  0.34200000   0.47539657
  0.34200000   0.47539657
  0.34200000   0.47539658
  0.34200000   0.47539658
  0.34200000   0.47539659
  0.34200000   0.47539659
  0.34200000   0.47539659
  0.34200000   0.47539660
  0.34200000   0.47539660
  0.34200000   0.47539661
  0.34200000   0.47539661
  0.34200000   0.47539662
  0.34200000   0.47539662
  0.34200000   0.47539663
  0.34200000   0.47539663
  0.34200000   0.47539664
  0.34200000   0.47539664
  0.34200000   0.47539664
  0.34200000   0.47539665
  0.34200000   0.47539665
  0.34200000   0.47539666
  0.34200000   0.47539666
  0.34200000   0.47539667
  0.34200000   0.47539667
  0.34200000   0.47539667
  0.34200000   0.47539668
  0.34200000   0.47539668
  0.34200000   0.47539669
  0.34200000   0.47539669
  0.34300000   0.47602566
  0.34300000   0.47602566
  0.34300000   0.47602566
  0.34300000   0.47602567
  0.34300000   0.47602567
  0.34300000   0.47602568
  0.34300000   0.47602568
  0.34300000   0.47602569
  0.34300000   0.47602569
  0.34300000   0.47602570
  0.34300000   0.47602570
  0.34300000   0.47602571
  0.34300000   0.47602571
  0.34300000   0.47602572
  0.34300000   0.47602572
  0.34300000   0.47602572
  0.34300000   0.47602573
  0.34300000   0.47602573
  0.34300000   0.47602574
  0.34300000   0.47602574
  0.34300000   0.47602575
  0.34300000   0.47602575
  0.34300000   0.47602576
  0.34300000   0.47602576
  0.34300000   0.47602577
  0.34300000   0.47602577
  0.34300000   0.47602577
  0.34300000   0.47602578
  0.34300000   0.47602578
  0.34300000   0.47602579
  0.34300000   0.47602579
  0.34300000   0.47602580
  0.34300000   0.47602580
  0.34300000   0.47602581
  0.34300000   0.47602581
  0.34300000   0.47602581
  0.34300000   0.47602582
  0.34300000   0.47602582
  0.34300000   0.47602583
  0.34300000   0.47602583
  0.34400000   0.47665299
  0.34400000   0.47665300
  0.34400000   0.47665300
  0.34400000   0.47665301
  0.34400000   0.47665301
  0.34400000   0.47665302
  0.34400000   0.47665302
  0.34400000   0.47665303
  0.34400000   0.47665303
  0.34400000   0.47665304
  0.34400000   0.47665304
  0.34400000   0.47665304
  0.34400000   0.47665305
  0.34400000   0.47665305
  0.34400000   0.47665306
  0.34400000   0.47665306
  0.34400000   0.47665307
  0.34400000   0.47665307
  0.34400000   0.47665308
  0.34400000   0.47665308
  0.34400000   0.47665309
  0.34400000   0.47665309
  0.34400000   0.47665309
  0.34400000   0.47665310
  0.34400000   0.47665310
  0.34400000   0.47665311
  0.34400000   0.47665311
  0.34400000   0.47665312
  0.34400000   0.47665312
  0.34400000   0.47665313
  0.34400000   0.47665313
  0.34400000   0.47665314
  0.34400000   0.47665314
  0.34400000   0.47665314
  0.34400000   0.47665315
  0.34400000   0.47665315
  0.34400000   0.47665316
  0.34400000   0.47665316
  0.34400000   0.47665317
  0.34400000   0.47665317
  0.34500000   0.47727854
  0.34500000   0.47727854
  0.34500000   0.47727855
  0.34500000   0.47727855
  0.34500000   0.47727856
  0.34500000   0.47727856
  0.34500000   0.47727857
  0.34500000   0.47727857
  0.34500000   0.47727858
  0.34500000   0.47727858
  0.34500000   0.47727859
  0.34500000   0.47727859
  0.34500000   0.47727860
  0.34500000   0.47727860
  0.34500000   0.47727861
  0.34500000   0.47727861
  0.34500000   0.47727861
  0.34500000   0.47727862
  0.34500000   0.47727862
  0.34500000   0.47727863
  0.34500000   0.47727863
  0.34500000   0.47727864
  0.34500000   0.47727864
  0.34500000   0.47727865
  0.34500000   0.47727865
  0.34500000   0.47727866
  0.34500000   0.47727866
  0.34500000   0.47727866
  0.34500000   0.47727867
  0.34500000   0.47727867
  0.34500000   0.47727868
  0.34500000   0.47727868
  0.34500000   0.47727869
  0.34500000   0.47727869
  0.34500000   0.47727870
  0.34500000   0.47727870
  0.34500000   0.47727870
  0.34500000   0.47727871
  0.34500000   0.47727871
  0.34500000   0.47727872
  0.34600000   0.47790230
  0.34600000   0.47790231
  0.34600000   0.47790231
  0.34600000   0.47790232
  0.34600000   0.47790232
  0.34600000   0.47790233
  0.34600000   0.47790233
  0.34600000   0.47790234
  0.34600000   0.47790234
  0.34600000   0.47790235
  0.34600000   0.47790235
  0.34600000   0.47790236
  0.34600000   0.47790236
  0.34600000   0.47790237
  0.34600000   0.47790237
  0.34600000   0.47790237
  0.34600000   0.47790238
  0.34600000   0.47790238
  0.34600000   0.47790239
  0.34600000   0.47790239
  0.34600000   0.47790240
  0.34600000   0.47790240
  0.34600000   0.47790241
  0.34600000   0.47790241
  0.34600000   0.47790242
  0.34600000   0.47790242
  0.34600000   0.47790242
  0.34600000   0.47790243
  0.34600000   0.47790243
  0.34600000   0.47790244
  0.34600000   0.47790244
  0.34600000   0.47790245
  0.34600000   0.47790245
  0.34600000   0.47790246
  0.34600000   0.47790246
  0.34600000   0.47790247
  0.34600000   0.47790247
  0.34600000   0.47790247
  0.34600000   0.47790248
  0.34600000   0.47790248
  0.34700000   0.47852430
  0.34700000   0.47852430
  0.34700000   0.47852431
  0.34700000   0.47852431
  0.34700000   0.47852431
  0.34700000   0.47852432
  0.34700000   0.47852432
  0.34700000   0.47852433
  0.34700000   0.47852433
  0.34700000   0.47852434
  0.34700000   0.47852434
  0.34700000   0.47852435
  0.34700000   0.47852435
  0.34700000   0.47852436
  0.34700000   0.47852436
  0.34700000   0.47852437
  0.34700000   0.47852437
  0.34700000   0.47852438
  0.34700000   0.47852438
  0.34700000   0.47852438
  0.34700000   0.47852439
  0.34700000   0.47852439
  0.34700000   0.47852440
  0.34700000   0.47852440
  0.34700000   0.47852441
  0.34700000   0.47852441
  0.34700000   0.47852442
  0.34700000   0.47852442
  0.34700000   0.47852443
  0.34700000   0.47852443
  0.34700000   0.47852443
  0.34700000   0.47852444
  0.34700000   0.47852444
  0.34700000   0.47852445
  0.34700000   0.47852445
  0.34700000   0.47852446
  0.34700000   0.47852446
  0.34700000   0.47852447
  0.34700000   0.47852447
  0.34700000   0.47852448
  0.34800000   0.47914452
  0.34800000   0.47914453
  0.34800000   0.47914453
  0.34800000   0.47914454
  0.34800000   0.47914454
  0.34800000   0.47914455
  0.34800000   0.47914455
  0.34800000   0.47914456
  0.34800000   0.47914456
  0.34800000   0.47914457
  0.34800000   0.47914457
  0.34800000   0.47914458
  0.34800000   0.47914458
  0.34800000   0.47914458
  0.34800000   0.47914459
  0.34800000   0.47914459
  0.34800000   0.47914460
  0.34800000   0.47914460
  0.34800000   0.47914461
  0.34800000   0.47914461
  0.34800000   0.47914462
  0.34800000   0.47914462
  0.34800000   0.47914463
  0.34800000   0.47914463
  0.34800000   0.47914464
  0.34800000   0.47914464
  0.34800000   0.47914465
  0.34800000   0.47914465
  0.34800000   0.47914465
  0.34800000   0.47914466
  0.34800000   0.47914466
  0.34800000   0.47914467
  0.34800000   0.47914467
  0.34800000   0.47914468
  0.34800000   0.47914468
  0.34800000   0.47914469
  0.34800000   0.47914469
  0.34800000   0.47914469
  0.34800000   0.47914470
  0.34800000   0.47914470
  0.34900000   0.47976300
  0.34900000   0.47976300
  0.34900000   0.47976301
  0.34900000   0.47976301
  0.34900000   0.47976302
  0.34900000   0.47976302
  0.34900000   0.47976302
  0.34900000   0.47976303
  0.34900000   0.47976303
  0.34900000   0.47976304
  0.34900000   0.47976304
  0.34900000   0.47976305
  0.34900000   0.47976305
  0.34900000   0.47976306
  0.34900000   0.47976306
  0.34900000   0.47976307
  0.34900000   0.47976307
  0.34900000   0.47976308
  0.34900000   0.47976308
  0.34900000   0.47976309
  0.34900000   0.47976309
  0.34900000   0.47976310
  0.34900000   0.47976310
  0.34900000   0.47976310
  0.34900000   0.47976311
  0.34900000   0.47976311
  0.34900000   0.47976312
  0.34900000   0.47976312
  0.34900000   0.47976313
  0.34900000   0.47976313
  0.34900000   0.47976314
  0.34900000   0.47976314
  0.34900000   0.47976315
  0.34900000   0.47976315
  0.34900000   0.47976315
  0.34900000   0.47976316
  0.34900000   0.47976316
  0.34900000   0.47976317
  0.34900000   0.47976317
  0.34900000   0.47976318
  0.35000000   0.48037972
  0.35000000   0.48037973
  0.35000000   0.48037973
  0.35000000   0.48037974
  0.35000000   0.48037974
  0.35000000   0.48037975
  0.35000000   0.48037975
  0.35000000   0.48037976
  0.35000000   0.48037976
  0.35000000   0.48037977
  0.35000000   0.48037977
  0.35000000   0.48037978
  0.35000000   0.48037978
  0.35000000   0.48037979
  0.35000000   0.48037979
  0.35000000   0.48037979
  0.35000000   0.48037980
  0.35000000   0.48037980
  0.35000000   0.48037981
  0.35000000   0.48037981
  0.35000000   0.48037982
  0.35000000   0.48037982
  0.35000000   0.48037983
  0.35000000   0.48037983
  0.35000000   0.48037984
  0.35000000   0.48037984
  0.35000000   0.48037985
  0.35000000   0.48037985
  0.35000000   0.48037986
  0.35000000   0.48037986
  0.35000000   0.48037986
  0.35000000   0.48037987
  0.35000000   0.48037987
  0.35000000   0.48037988
  0.35000000   0.48037988
  0.35000000   0.48037989
  0.35000000   0.48037989
  0.35000000   0.48037990
  0.35000000   0.48037990
  0.35000000   0.48037990
  0.35100000   0.48099471
  0.35100000   0.48099472
  0.35100000   0.48099472
  0.35100000   0.48099473
  0.35100000   0.48099473
  0.35100000   0.48099474
  0.35100000   0.48099474
  0.35100000   0.48099475
  0.35100000   0.48099475
  0.35100000   0.48099476
  0.35100000   0.48099476
  0.35100000   0.48099477
  0.35100000   0.48099477
  0.35100000   0.48099478
  0.35100000   0.48099478
  0.35100000   0.48099479
  0.35100000   0.48099479
  0.35100000   0.48099479
  0.35100000   0.48099480
  0.35100000   0.48099480
  0.35100000   0.48099481
  0.35100000   0.48099481
  0.35100000   0.48099482
  0.35100000   0.48099482
  0.35100000   0.48099483
  0.35100000   0.48099483
  0.35100000   0.48099484
  0.35100000   0.48099484
  0.35100000   0.48099485
  0.35100000   0.48099485
  0.35100000   0.48099485
  0.35100000   0.48099486
  0.35100000   0.48099486
  0.35100000   0.48099487
  0.35100000   0.48099487
  0.35100000   0.48099488
  0.35100000   0.48099488
  0.35100000   0.48099489
  0.35100000   0.48099489
  0.35100000   0.48099490
  0.35200000   0.48160798
  0.35200000   0.48160798
  0.35200000   0.48160798
  0.35200000   0.48160799
  0.35200000   0.48160799
  0.35200000   0.48160800
  0.35200000   0.48160800
  0.35200000   0.48160801
  0.35200000   0.48160801
  0.35200000   0.48160802
  0.35200000   0.48160802
  0.35200000   0.48160803
  0.35200000   0.48160803
  0.35200000   0.48160804
  0.35200000   0.48160804
  0.35200000   0.48160805
  0.35200000   0.48160805
  0.35200000   0.48160806
  0.35200000   0.48160806
  0.35200000   0.48160807
  0.35200000   0.48160807
  0.35200000   0.48160808
  0.35200000   0.48160808
  0.35200000   0.48160808
  0.35200000   0.48160809
  0.35200000   0.48160809
  0.35200000   0.48160810
  0.35200000   0.48160810
  0.35200000   0.48160811
  0.35200000   0.48160811
  0.35200000   0.48160812
  0.35200000   0.48160812
  0.35200000   0.48160813
  0.35200000   0.48160813
  0.35200000   0.48160814
  0.35200000   0.48160814
  0.35200000   0.48160814
  0.35200000   0.48160815
  0.35200000   0.48160815
  0.35200000   0.48160816
  0.35300000   0.48221952
  0.35300000   0.48221952
  0.35300000   0.48221953
  0.35300000   0.48221953
  0.35300000   0.48221954
  0.35300000   0.48221954
  0.35300000   0.48221955
  0.35300000   0.48221955
  0.35300000   0.48221956
  0.35300000   0.48221956
  0.35300000   0.48221957
  0.35300000   0.48221957
  0.35300000   0.48221958
  0.35300000   0.48221958
  0.35300000   0.48221959
  0.35300000   0.48221959
  0.35300000   0.48221960
  0.35300000   0.48221960
  0.35300000   0.48221960
  0.35300000   0.48221961
  0.35300000   0.48221961
  0.35300000   0.48221962
  0.35300000   0.48221962
  0.35300000   0.48221963
  0.35300000   0.48221963
  0.35300000   0.48221964
  0.35300000   0.48221964
  0.35300000   0.48221965
  0.35300000   0.48221965
  0.35300000   0.48221966
  0.35300000   0.48221966
  0.35300000   0.48221967
  0.35300000   0.48221967
  0.35300000   0.48221967
  0.35300000   0.48221968
  0.35300000   0.48221968
  0.35300000   0.48221969
  0.35300000   0.48221969
  0.35300000   0.48221970
  0.35300000   0.48221970
  0.35400000   0.48282935
  0.35400000   0.48282935
  0.35400000   0.48282936
  0.35400000   0.48282936
  0.35400000   0.48282937
  0.35400000   0.48282937
  0.35400000   0.48282938
  0.35400000   0.48282938
  0.35400000   0.48282939
  0.35400000   0.48282939
  0.35400000   0.48282940
  0.35400000   0.48282940
  0.35400000   0.48282941
  0.35400000   0.48282941
  0.35400000   0.48282942
  0.35400000   0.48282942
  0.35400000   0.48282943
  0.35400000   0.48282943
  0.35400000   0.48282944
  0.35400000   0.48282944
  0.35400000   0.48282945
  0.35400000   0.48282945
  0.35400000   0.48282946
  0.35400000   0.48282946
  0.35400000   0.48282947
  0.35400000   0.48282947
  0.35400000   0.48282947
  0.35400000   0.48282948
  0.35400000   0.48282948
  0.35400000   0.48282949
  0.35400000   0.48282949
  0.35400000   0.48282950
  0.35400000   0.48282950
  0.35400000   0.48282951
  0.35400000   0.48282951
  0.35400000   0.48282952
  0.35400000   0.48282952
  0.35400000   0.48282953
  0.35400000   0.48282953
  0.35400000   0.48282953
  0.35500000   0.48343748
  0.35500000   0.48343748
  0.35500000   0.48343749
  0.35500000   0.48343749
  0.35500000   0.48343750
  0.35500000   0.48343750
  0.35500000   0.48343751
  0.35500000   0.48343751
  0.35500000   0.48343752
  0.35500000   0.48343752
  0.35500000   0.48343753
  0.35500000   0.48343753
  0.35500000   0.48343754
  0.35500000   0.48343754
  0.35500000   0.48343755
  0.35500000   0.48343755
  0.35500000   0.48343756
  0.35500000   0.48343756
  0.35500000   0.48343757
  0.35500000   0.48343757
  0.35500000   0.48343758
  0.35500000   0.48343758
  0.35500000   0.48343759
  0.35500000   0.48343759
  0.35500000   0.48343760
  0.35500000   0.48343760
  0.35500000   0.48343761
  0.35500000   0.48343761
  0.35500000   0.48343761
  0.35500000   0.48343762
  0.35500000   0.48343762
  0.35500000   0.48343763
  0.35500000   0.48343763
  0.35500000   0.48343764
  0.35500000   0.48343764
  0.35500000   0.48343765
  0.35500000   0.48343765
  0.35500000   0.48343766
  0.35500000   0.48343766
  0.35500000   0.48343767
  0.35600000   0.48404392
  0.35600000   0.48404392
  0.35600000   0.48404393
  0.35600000   0.48404393
  0.35600000   0.48404394
  0.35600000   0.48404394
  0.35600000   0.48404395
  0.35600000   0.48404395
  0.35600000   0.48404396
  0.35600000   0.48404396
  0.35600000   0.48404397
  0.35600000   0.48404397
  0.35600000   0.48404398
  0.35600000   0.48404398
  0.35600000   0.48404398
  0.35600000   0.48404399
  0.35600000   0.48404399
  0.35600000   0.48404400
  0.35600000   0.48404400
  0.35600000   0.48404401
  0.35600000   0.48404401
  0.35600000   0.48404402
  0.35600000   0.48404402
  0.35600000   0.48404403
  0.35600000   0.48404403
  0.35600000   0.48404404
  0.35600000   0.48404404
  0.35600000   0.48404405
  0.35600000   0.48404405
  0.35600000   0.48404406
  0.35600000   0.48404406
  0.35600000   0.48404407
  0.35600000   0.48404407
  0.35600000   0.48404408
  0.35600000   0.48404408
  0.35600000   0.48404408
  0.35600000   0.48404409
  0.35600000   0.48404409
  0.35600000   0.48404410
  0.35600000   0.48404410
  0.35700000   0.48464867
  0.35700000   0.48464867
  0.35700000   0.48464868
  0.35700000   0.48464868
  0.35700000   0.48464869
  0.35700000   0.48464869
  0.35700000   0.48464870
  0.35700000   0.48464870
  0.35700000   0.48464871
  0.35700000   0.48464871
  0.35700000   0.48464872
  0.35700000   0.48464872
  0.35700000   0.48464873
  0.35700000   0.48464873
  0.35700000   0.48464874
  0.35700000   0.48464874
  0.35700000   0.48464875
  0.35700000   0.48464875
  0.35700000   0.48464876
  0.35700000   0.48464876
  0.35700000   0.48464877
  0.35700000   0.48464877
  0.35700000   0.48464878
  0.35700000   0.48464878
  0.35700000   0.48464878
  0.35700000   0.48464879
  0.35700000   0.48464879
  0.35700000   0.48464880
  0.35700000   0.48464880
  0.35700000   0.48464881
  0.35700000   0.48464881
  0.35700000   0.48464882
  0.35700000   0.48464882
  0.35700000   0.48464883
  0.35700000   0.48464883
  0.35700000   0.48464884
  0.35700000   0.48464884
  0.35700000   0.48464885
  0.35700000   0.48464885
  0.35700000   0.48464886
  0.35800000   0.48525174
  0.35800000   0.48525175
  0.35800000   0.48525175
  0.35800000   0.48525176
  0.35800000   0.48525176
  0.35800000   0.48525177
  0.35800000   0.48525177
  0.35800000   0.48525178
  0.35800000   0.48525178
  0.35800000   0.48525179
  0.35800000   0.48525179
  0.35800000   0.48525180
  0.35800000   0.48525180
  0.35800000   0.48525181
  0.35800000   0.48525181
  0.35800000   0.48525182
  0.35800000   0.48525182
  0.35800000   0.48525183
  0.35800000   0.48525183
  0.35800000   0.48525184
  0.35800000   0.48525184
  0.35800000   0.48525185
  0.35800000   0.48525185
  0.35800000   0.48525186
  0.35800000   0.48525186
  0.35800000   0.48525187
  0.35800000   0.48525187
  0.35800000   0.48525187
  0.35800000   0.48525188
  0.35800000   0.48525188
  0.35800000   0.48525189
  0.35800000   0.48525189
  0.35800000   0.48525190
  0.35800000   0.48525190
  0.35800000   0.48525191
  0.35800000   0.48525191
  0.35800000   0.48525192
  0.35800000   0.48525192
  0.35800000   0.48525193
  0.35800000   0.48525193
  0.35900000   0.48585315
  0.35900000   0.48585315
  0.35900000   0.48585316
  0.35900000   0.48585316
  0.35900000   0.48585317
  0.35900000   0.48585317
  0.35900000   0.48585318
  0.35900000   0.48585318
  0.35900000   0.48585319
  0.35900000   0.48585319
  0.35900000   0.48585320
  0.35900000   0.48585320
  0.35900000   0.48585321
  0.35900000   0.48585321
  0.35900000   0.48585322
  0.35900000   0.48585322
  0.35900000   0.48585323
  0.35900000   0.48585323
  0.35900000   0.48585324
  0.35900000   0.48585324
  0.35900000   0.48585325
  0.35900000   0.48585325
  0.35900000   0.48585326
  0.35900000   0.48585326
  0.35900000   0.48585327
  0.35900000   0.48585327
  0.35900000   0.48585328
  0.35900000   0.48585328
  0.35900000   0.48585329
  0.35900000   0.48585329
  0.35900000   0.48585330
  0.35900000   0.48585330
  0.35900000   0.48585331
  0.35900000   0.48585331
  0.35900000   0.48585332
  0.35900000   0.48585332
  0.35900000   0.48585332
  0.35900000   0.48585333
  0.35900000   0.48585333
  0.35900000   0.48585334
  0.36000000   0.48645290
  0.36000000   0.48645290
  0.36000000   0.48645291
  0.36000000   0.48645291
  0.36000000   0.48645292
  0.36000000   0.48645292
  0.36000000   0.48645293
  0.36000000   0.48645293
  0.36000000   0.48645294
  0.36000000   0.48645294
  0.36000000   0.48645295
  0.36000000   0.48645295
  0.36000000   0.48645296
  0.36000000   0.48645296
  0.36000000   0.48645297
  0.36000000   0.48645297
  0.36000000   0.48645298
  0.36000000   0.48645298
  0.36000000   0.48645299
  0.36000000   0.48645299
  0.36000000   0.48645300
  0.36000000   0.48645300
  0.36000000   0.48645301
  0.36000000   0.48645301
  0.36000000   0.48645301
  0.36000000   0.48645302
  0.36000000   0.48645302
  0.36000000   0.48645303
  0.36000000   0.48645303
  0.36000000   0.48645304
  0.36000000   0.48645304
  0.36000000   0.48645305
  0.36000000   0.48645305
  0.36000000   0.48645306
  0.36000000   0.48645306
  0.36000000   0.48645307
  0.36000000   0.48645307
  0.36000000   0.48645308
  0.36000000   0.48645308
  0.36000000   0.48645309
  0.36100000   0.48705099
  0.36100000   0.48705100
  0.36100000   0.48705100
  0.36100000   0.48705101
  0.36100000   0.48705101
  0.36100000   0.48705102
  0.36100000   0.48705102
  0.36100000   0.48705103
  0.36100000   0.48705103
  0.36100000   0.48705104
  0.36100000   0.48705104
  0.36100000   0.48705105
  0.36100000   0.48705105
  0.36100000   0.48705106
  0.36100000   0.48705106
  0.36100000   0.48705107
  0.36100000   0.48705107
  0.36100000   0.48705108
  0.36100000   0.48705108
  0.36100000   0.48705109
  0.36100000   0.48705109
  0.36100000   0.48705110
  0.36100000   0.48705110
  0.36100000   0.48705111
  0.36100000   0.48705111
  0.36100000   0.48705112
  0.36100000   0.48705112
  0.36100000   0.48705113
  0.36100000   0.48705113
  0.36100000   0.48705113
  0.36100000   0.48705114
  0.36100000   0.48705114
  0.36100000   0.48705115
  0.36100000   0.48705115
  0.36100000   0.48705116
  0.36100000   0.48705116
  0.36100000   0.48705117
  0.36100000   0.48705117
  0.36100000   0.48705118
  0.36100000   0.48705118
  0.36200000   0.48764744
  0.36200000   0.48764745
  0.36200000   0.48764745
  0.36200000   0.48764746
  0.36200000   0.48764746
  0.36200000   0.48764747
  0.36200000   0.48764747
  0.36200000   0.48764748
  0.36200000   0.48764748
  0.36200000   0.48764749
  0.36200000   0.48764749
  0.36200000   0.48764750
  0.36200000   0.48764750
  0.36200000   0.48764751
  0.36200000   0.48764751
  0.36200000   0.48764752
  0.36200000   0.48764752
  0.36200000   0.48764753
  0.36200000   0.48764753
  0.36200000   0.48764754
  0.36200000   0.48764754
  0.36200000   0.48764755
  0.36200000   0.48764755
  0.36200000   0.48764756
  0.36200000   0.48764756
  0.36200000   0.48764757
  0.36200000   0.48764757
  0.36200000   0.48764758
  0.36200000   0.48764758
  0.36200000   0.48764759
  0.36200000   0.48764759
  0.36200000   0.48764760
  0.36200000   0.48764760
  0.36200000   0.48764761
  0.36200000   0.48764761
  0.36200000   0.48764762
  0.36200000   0.48764762
  0.36200000   0.48764763
  0.36200000   0.48764763
  0.36200000   0.48764763
  0.36300000   0.48824226
  0.36300000   0.48824227
  0.36300000   0.48824227
  0.36300000   0.48824228
  0.36300000   0.48824228
  0.36300000   0.48824229
  0.36300000   0.48824229
  0.36300000   0.48824230
  0.36300000   0.48824230
  0.36300000   0.48824231
  0.36300000   0.48824231
  0.36300000   0.48824232
  0.36300000   0.48824232
  0.36300000   0.48824233
  0.36300000   0.48824233
  0.36300000   0.48824234
  0.36300000   0.48824234
  0.36300000   0.48824235
  0.36300000   0.48824235
  0.36300000   0.48824236
  0.36300000   0.48824236
  0.36300000   0.48824236
  0.36300000   0.48824237
  0.36300000   0.48824237
  0.36300000   0.48824238
  0.36300000   0.48824238
  0.36300000   0.48824239
  0.36300000   0.48824239
  0.36300000   0.48824240
  0.36300000   0.48824240
  0.36300000   0.48824241
  0.36300000   0.48824241
  0.36300000   0.48824242
  0.36300000   0.48824242
  0.36300000   0.48824243
  0.36300000   0.48824243
  0.36300000   0.48824244
  0.36300000   0.48824244
  0.36300000   0.48824245
  0.36300000   0.48824245
  0.36400000   0.48883545
  0.36400000   0.48883545
  0.36400000   0.48883546
  0.36400000   0.48883546
  0.36400000   0.48883547
  0.36400000   0.48883547
  0.36400000   0.48883548
  0.36400000   0.48883548
  0.36400000   0.48883549
  0.36400000   0.48883549
  0.36400000   0.48883550
  0.36400000   0.48883550
  0.36400000   0.48883551
  0.36400000   0.48883551
  0.36400000   0.48883552
  0.36400000   0.48883552
  0.36400000   0.48883553
  0.36400000   0.48883553
  0.36400000   0.48883554
  0.36400000   0.48883554
  0.36400000   0.48883555
  0.36400000   0.48883555
  0.36400000   0.48883556
  0.36400000   0.48883556
  0.36400000   0.48883557
  0.36400000   0.48883557
  0.36400000   0.48883558
  0.36400000   0.48883558
  0.36400000   0.48883559
  0.36400000   0.48883559
  0.36400000   0.48883560
  0.36400000   0.48883560
  0.36400000   0.48883561
  0.36400000   0.48883561
  0.36400000   0.48883562
  0.36400000   0.48883562
  0.36400000   0.48883563
  0.36400000   0.48883563
  0.36400000   0.48883564
  0.36400000   0.48883564
  0.36500000   0.48942702
  0.36500000   0.48942702
  0.36500000   0.48942703
  0.36500000   0.48942703
  0.36500000   0.48942704
  0.36500000   0.48942704
  0.36500000   0.48942705
  0.36500000   0.48942705
  0.36500000   0.48942706
  0.36500000   0.48942706
  0.36500000   0.48942707
  0.36500000   0.48942707
  0.36500000   0.48942708
  0.36500000   0.48942708
  0.36500000   0.48942709
  0.36500000   0.48942709
  0.36500000   0.48942710
  0.36500000   0.48942710
  0.36500000   0.48942711
  0.36500000   0.48942711
  0.36500000   0.48942712
  0.36500000   0.48942712
  0.36500000   0.48942713
  0.36500000   0.48942713
  0.36500000   0.48942714
  0.36500000   0.48942714
  0.36500000   0.48942715
  0.36500000   0.48942715
  0.36500000   0.48942716
  0.36500000   0.48942716
  0.36500000   0.48942717
  0.36500000   0.48942717
  0.36500000   0.48942718
  0.36500000   0.48942718
  0.36500000   0.48942719
  0.36500000   0.48942719
  0.36500000   0.48942720
  0.36500000   0.48942720
  0.36500000   0.48942721
  0.36500000   0.48942721
  0.36600000   0.49001698
  0.36600000   0.49001698
  0.36600000   0.49001699
  0.36600000   0.49001699
  0.36600000   0.49001700
  0.36600000   0.49001700
  0.36600000   0.49001701
  0.36600000   0.49001701
  0.36600000   0.49001702
  0.36600000   0.49001702
  0.36600000   0.49001703
  0.36600000   0.49001703
  0.36600000   0.49001704
  0.36600000   0.49001704
  0.36600000   0.49001705
  0.36600000   0.49001705
  0.36600000   0.49001706
  0.36600000   0.49001706
  0.36600000   0.49001707
  0.36600000   0.49001707
  0.36600000   0.49001708
  0.36600000   0.49001708
  0.36600000   0.49001709
  0.36600000   0.49001709
  0.36600000   0.49001710
  0.36600000   0.49001710
  0.36600000   0.49001711
  0.36600000   0.49001711
  0.36600000   0.49001712
  0.36600000   0.49001712
  0.36600000   0.49001713
  0.36600000   0.49001713
  0.36600000   0.49001714
  0.36600000   0.49001714
  0.36600000   0.49001715
  0.36600000   0.49001715
  0.36600000   0.49001716
  0.36600000   0.49001716
  0.36600000   0.49001717
  0.36600000   0.49001717
  0.36700000   0.49060533
  0.36700000   0.49060534
  0.36700000   0.49060534
  0.36700000   0.49060535
  0.36700000   0.49060535
  0.36700000   0.49060536
  0.36700000   0.49060536
  0.36700000   0.49060537
  0.36700000   0.49060537
  0.36700000   0.49060538
  0.36700000   0.49060538
  0.36700000   0.49060539
  0.36700000   0.49060539
  0.36700000   0.49060540
  0.36700000   0.49060540
  0.36700000   0.49060541
  0.36700000   0.49060541
  0.36700000   0.49060542
  0.36700000   0.49060542
  0.36700000   0.49060543
  0.36700000   0.49060543
  0.36700000   0.49060544
  0.36700000   0.49060544
  0.36700000   0.49060545
  0.36700000   0.49060545
  0.36700000   0.49060546
  0.36700000   0.49060546
  0.36700000   0.49060547
  0.36700000   0.49060547
  0.36700000   0.49060548
  0.36700000   0.49060548
  0.36700000   0.49060549
  0.36700000   0.49060549
  0.36700000   0.49060550
  0.36700000   0.49060550
  0.36700000   0.49060551
  0.36700000   0.49060551
  0.36700000   0.49060552
  0.36700000   0.49060552
  0.36700000   0.49060553
  0.36800000   0.49119209
  0.36800000   0.49119209
  0.36800000   0.49119210
  0.36800000   0.49119211
  0.36800000   0.49119211
  0.36800000   0.49119212
  0.36800000   0.49119212
  0.36800000   0.49119213
  0.36800000   0.49119213
  0.36800000   0.49119214
  0.36800000   0.49119214
  0.36800000   0.49119215
  0.36800000   0.49119215
  0.36800000   0.49119216
  0.36800000   0.49119216
  0.36800000   0.49119217
  0.36800000   0.49119217
  0.36800000   0.49119218
  0.36800000   0.49119218
  0.36800000   0.49119219
  0.36800000   0.49119219
  0.36800000   0.49119220
  0.36800000   0.49119220
  0.36800000   0.49119221
  0.36800000   0.49119221
  0.36800000   0.49119222
  0.36800000   0.49119222
  0.36800000   0.49119223
  0.36800000   0.49119223
  0.36800000   0.49119224
  0.36800000   0.49119224
  0.36800000   0.49119225
  0.36800000   0.49119225
  0.36800000   0.49119226
  0.36800000   0.49119226
  0.36800000   0.49119227
  0.36800000   0.49119227
  0.36800000   0.49119227
  0.36800000   0.49119228
  0.36800000   0.49119228
  0.36900000   0.49177726
  0.36900000   0.49177727
  0.36900000   0.49177727
  0.36900000   0.49177728
  0.36900000   0.49177728
  0.36900000   0.49177729
  0.36900000   0.49177729
  0.36900000   0.49177730
  0.36900000   0.49177730
  0.36900000   0.49177731
  0.36900000   0.49177731
  0.36900000   0.49177732
  0.36900000   0.49177732
  0.36900000   0.49177733
  0.36900000   0.49177733
  0.36900000   0.49177734
  0.36900000   0.49177734
  0.36900000   0.49177735
  0.36900000   0.49177735
  0.36900000   0.49177736
  0.36900000   0.49177736
  0.36900000   0.49177737
  0.36900000   0.49177737
  0.36900000   0.49177738
  0.36900000   0.49177738
  0.36900000   0.49177739
  0.36900000   0.49177739
  0.36900000   0.49177740
  0.36900000   0.49177740
  0.36900000   0.49177741
  0.36900000   0.49177741
  0.36900000   0.49177742
  0.36900000   0.49177742
  0.36900000   0.49177743
  0.36900000   0.49177743
  0.36900000   0.49177744
  0.36900000   0.49177744
  0.36900000   0.49177745
  0.36900000   0.49177745
  0.36900000   0.49177746
  0.37000000   0.49236085
  0.37000000   0.49236086
  0.37000000   0.49236086
  0.37000000   0.49236087
  0.37000000   0.49236087
  0.37000000   0.49236088
  0.37000000   0.49236088
  0.37000000   0.49236089
  0.37000000   0.49236089
  0.37000000   0.49236090
  0.37000000   0.49236090
  0.37000000   0.49236091
  0.37000000   0.49236091
  0.37000000   0.49236092
  0.37000000   0.49236092
  0.37000000   0.49236093
  0.37000000   0.49236093
  0.37000000   0.49236094
  0.37000000   0.49236094
  0.37000000   0.49236095
  0.37000000   0.49236095
  0.37000000   0.49236096
  0.37000000   0.49236096
  0.37000000   0.49236097
  0.37000000   0.49236097
  0.37000000   0.49236098
  0.37000000   0.49236098
  0.37000000   0.49236099
  0.37000000   0.49236099
  0.37000000   0.49236100
  0.37000000   0.49236100
  0.37000000   0.49236101
  0.37000000   0.49236101
  0.37000000   0.49236102
  0.37000000   0.49236102
  0.37000000   0.49236103
  0.37000000   0.49236103
  0.37000000   0.49236104
  0.37000000   0.49236104
  0.37000000   0.49236105
  0.37100000   0.49294287
  0.37100000   0.49294287
  0.37100000   0.49294288
  0.37100000   0.49294288
  0.37100000   0.49294289
  0.37100000   0.49294289
  0.37100000   0.49294290
  0.37100000   0.49294290
  0.37100000   0.49294291
  0.37100000   0.49294291
  0.37100000   0.49294292
  0.37100000   0.49294292
  0.37100000   0.49294293
  0.37100000   0.49294293
  0.37100000   0.49294294
  0.37100000   0.49294294
  0.37100000   0.49294295
  0.37100000   0.49294295
  0.37100000   0.49294296
  0.37100000   0.49294297
  0.37100000   0.49294297
  0.37100000   0.49294298
  0.37100000   0.49294298
  0.37100000   0.49294299
  0.37100000   0.49294299
  0.37100000   0.49294300
  0.37100000   0.49294300
  0.37100000   0.49294301
  0.37100000   0.49294301
  0.37100000   0.49294302
  0.37100000   0.49294302
  0.37100000   0.49294302
  0.37100000   0.49294303
  0.37100000   0.49294303
  0.37100000   0.49294304
  0.37100000   0.49294304
  0.37100000   0.49294305
  0.37100000   0.49294305
  0.37100000   0.49294306
  0.37100000   0.49294306
  0.37200000   0.49352332
  0.37200000   0.49352332
  0.37200000   0.49352333
  0.37200000   0.49352333
  0.37200000   0.49352334
  0.37200000   0.49352335
  0.37200000   0.49352335
  0.37200000   0.49352336
  0.37200000   0.49352336
  0.37200000   0.49352337
  0.37200000   0.49352337
  0.37200000   0.49352338
  0.37200000   0.49352338
  0.37200000   0.49352339
  0.37200000   0.49352339
  0.37200000   0.49352340
  0.37200000   0.49352340
  0.37200000   0.49352341
  0.37200000   0.49352341
  0.37200000   0.49352342
  0.37200000   0.49352342
  0.37200000   0.49352343
  0.37200000   0.49352343
  0.37200000   0.49352344
  0.37200000   0.49352344
  0.37200000   0.49352345
  0.37200000   0.49352345
  0.37200000   0.49352346
  0.37200000   0.49352346
  0.37200000   0.49352347
  0.37200000   0.49352347
  0.37200000   0.49352348
  0.37200000   0.49352348
  0.37200000   0.49352349
  0.37200000   0.49352349
  0.37200000   0.49352350
  0.37200000   0.49352350
  0.37200000   0.49352351
  0.37200000   0.49352351
  0.37200000   0.49352352
  0.37300000   0.49410221
  0.37300000   0.49410222
  0.37300000   0.49410222
  0.37300000   0.49410223
  0.37300000   0.49410223
  0.37300000   0.49410224
  0.37300000   0.49410224
  0.37300000   0.49410225
  0.37300000   0.49410226
  0.37300000   0.49410226
  0.37300000   0.49410227
  0.37300000   0.49410227
  0.37300000   0.49410228
  0.37300000   0.49410228
  0.37300000   0.49410229
  0.37300000   0.49410229
  0.37300000   0.49410230
  0.37300000   0.49410230
  0.37300000   0.49410231
  0.37300000   0.49410231
  0.37300000   0.49410232
  0.37300000   0.49410232
  0.37300000   0.49410233
  0.37300000   0.49410233
  0.37300000   0.49410234
  0.37300000   0.49410234
  0.37300000   0.49410235
  0.37300000   0.49410235
  0.37300000   0.49410236
  0.37300000   0.49410236
  0.37300000   0.49410237
  0.37300000   0.49410237
  0.37300000   0.49410238
  0.37300000   0.49410238
  0.37300000   0.49410239
  0.37300000   0.49410239
  0.37300000   0.49410240
  0.37300000   0.49410240
  0.37300000   0.49410241
  0.37300000   0.49410241
  0.37400000   0.49467956
  0.37400000   0.49467956
  0.37400000   0.49467957
  0.37400000   0.49467957
  0.37400000   0.49467958
  0.37400000   0.49467958
  0.37400000   0.49467959
  0.37400000   0.49467959
  0.37400000   0.49467960
  0.37400000   0.49467960
  0.37400000   0.49467961
  0.37400000   0.49467962
  0.37400000   0.49467962
  0.37400000   0.49467963
  0.37400000   0.49467963
  0.37400000   0.49467964
  0.37400000   0.49467964
  0.37400000   0.49467965
  0.37400000   0.49467965
  0.37400000   0.49467966
  0.37400000   0.49467966
  0.37400000   0.49467967
  0.37400000   0.49467967
  0.37400000   0.49467968
  0.37400000   0.49467968
  0.37400000   0.49467969
  0.37400000   0.49467969
  0.37400000   0.49467970
  0.37400000   0.49467970
  0.37400000   0.49467971
  0.37400000   0.49467971
  0.37400000   0.49467972
  0.37400000   0.49467972
  0.37400000   0.49467973
  0.37400000   0.49467973
  0.37400000   0.49467974
  0.37400000   0.49467974
  0.37400000   0.49467975
  0.37400000   0.49467975
  0.37400000   0.49467976
  0.37500000   0.49525536
  0.37500000   0.49525536
  0.37500000   0.49525537
  0.37500000   0.49525537
  0.37500000   0.49525538
  0.37500000   0.49525538
  0.37500000   0.49525539
  0.37500000   0.49525540
  0.37500000   0.49525540
  0.37500000   0.49525541
  0.37500000   0.49525541
  0.37500000   0.49525542
  0.37500000   0.49525542
  0.37500000   0.49525543
  0.37500000   0.49525543
  0.37500000   0.49525544
  0.37500000   0.49525544
  0.37500000   0.49525545
  0.37500000   0.49525545
  0.37500000   0.49525546
  0.37500000   0.49525546
  0.37500000   0.49525547
  0.37500000   0.49525547
  0.37500000   0.49525548
  0.37500000   0.49525548
  0.37500000   0.49525549
  0.37500000   0.49525549
  0.37500000   0.49525550
  0.37500000   0.49525550
  0.37500000   0.49525551
  0.37500000   0.49525551
  0.37500000   0.49525552
  0.37500000   0.49525552
  0.37500000   0.49525553
  0.37500000   0.49525553
  0.37500000   0.49525554
  0.37500000   0.49525554
  0.37500000   0.49525555
  0.37500000   0.49525555
  0.37500000   0.49525556
  0.37600000   0.49582962
  0.37600000   0.49582963
  0.37600000   0.49582963
  0.37600000   0.49582964
  0.37600000   0.49582965
  0.37600000   0.49582965
  0.37600000   0.49582966
  0.37600000   0.49582966
  0.37600000   0.49582967
  0.37600000   0.49582967
  0.37600000   0.49582968
  0.37600000   0.49582968
  0.37600000   0.49582969
  0.37600000   0.49582969
  0.37600000   0.49582970
  0.37600000   0.49582970
  0.37600000   0.49582971
  0.37600000   0.49582971
  0.37600000   0.49582972
  0.37600000   0.49582972
  0.37600000   0.49582973
  0.37600000   0.49582973
  0.37600000   0.49582974
  0.37600000   0.49582974
  0.37600000   0.49582975
  0.37600000   0.49582975
  0.37600000   0.49582976
  0.37600000   0.49582976
  0.37600000   0.49582977
  0.37600000   0.49582977
  0.37600000   0.49582978
  0.37600000   0.49582978
  0.37600000   0.49582979
  0.37600000   0.49582979
  0.37600000   0.49582980
  0.37600000   0.49582980
  0.37600000   0.49582981
  0.37600000   0.49582981
  0.37600000   0.49582982
  0.37600000   0.49582982
  0.37700000   0.49640236
  0.37700000   0.49640237
  0.37700000   0.49640237
  0.37700000   0.49640238
  0.37700000   0.49640238
  0.37700000   0.49640239
  0.37700000   0.49640239
  0.37700000   0.49640240
  0.37700000   0.49640240
  0.37700000   0.49640241
  0.37700000   0.49640241
  0.37700000   0.49640242
  0.37700000   0.49640242
  0.37700000   0.49640243
  0.37700000   0.49640244
  0.37700000   0.49640244
  0.37700000   0.49640245
  0.37700000   0.49640245
  0.37700000   0.49640246
  0.37700000   0.49640246
  0.37700000   0.49640247
  0.37700000   0.49640247
  0.37700000   0.49640248
  0.37700000   0.49640248
  0.37700000   0.49640249
  0.37700000   0.49640249
  0.37700000   0.49640250
  0.37700000   0.49640250
  0.37700000   0.49640251
  0.37700000   0.49640251
  0.37700000   0.49640252
  0.37700000   0.49640252
  0.37700000   0.49640253
  0.37700000   0.49640253
  0.37700000   0.49640254
  0.37700000   0.49640254
  0.37700000   0.49640255
  0.37700000   0.49640255
  0.37700000   0.49640256
  0.37700000   0.49640256
  0.37800000   0.49697358
  0.37800000   0.49697358
  0.37800000   0.49697359
  0.37800000   0.49697359
  0.37800000   0.49697360
  0.37800000   0.49697360
  0.37800000   0.49697361
  0.37800000   0.49697361
  0.37800000   0.49697362
  0.37800000   0.49697363
  0.37800000   0.49697363
  0.37800000   0.49697364
  0.37800000   0.49697364
  0.37800000   0.49697365
  0.37800000   0.49697365
  0.37800000   0.49697366
  0.37800000   0.49697366
  0.37800000   0.49697367
  0.37800000   0.49697367
  0.37800000   0.49697368
  0.37800000   0.49697368
  0.37800000   0.49697369
  0.37800000   0.49697369
  0.37800000   0.49697370
  0.37800000   0.49697370
  0.37800000   0.49697371
  0.37800000   0.49697371
  0.37800000   0.49697372
  0.37800000   0.49697372
  0.37800000   0.49697373
  0.37800000   0.49697373
  0.37800000   0.49697374
  0.37800000   0.49697374
  0.37800000   0.49697375
  0.37800000   0.49697375
  0.37800000   0.49697376
  0.37800000   0.49697376
  0.37800000   0.49697377
  0.37800000   0.49697377
  0.37800000   0.49697378
  0.37900000   0.49754328
  0.37900000   0.49754329
  0.37900000   0.49754329
  0.37900000   0.49754330
  0.37900000   0.49754330
  0.37900000   0.49754331
  0.37900000   0.49754331
  0.37900000   0.49754332
  0.37900000   0.49754332
  0.37900000   0.49754333
  0.37900000   0.49754333
  0.37900000   0.49754334
  0.37900000   0.49754334
  0.37900000   0.49754335
  0.37900000   0.49754335
  0.37900000   0.49754336
  0.37900000   0.49754336
  0.37900000   0.49754337
  0.37900000   0.49754337
  0.37900000   0.49754338
  0.37900000   0.49754339
  0.37900000   0.49754339
  0.37900000   0.49754340
  0.37900000   0.49754340
  0.37900000   0.49754341
  0.37900000   0.49754341
  0.37900000   0.49754342
  0.37900000   0.49754342
  0.37900000   0.49754343
  0.37900000   0.49754343
  0.37900000   0.49754344
  0.37900000   0.49754344
  0.37900000   0.49754345
  0.37900000   0.49754345
  0.37900000   0.49754346
  0.37900000   0.49754346
  0.37900000   0.49754347
  0.37900000   0.49754347
  0.37900000   0.49754348
  0.37900000   0.49754348
  0.38000000   0.49811148
  0.38000000   0.49811148
  0.38000000   0.49811149
  0.38000000   0.49811149
  0.38000000   0.49811150
  0.38000000   0.49811150
  0.38000000   0.49811151
  0.38000000   0.49811151
  0.38000000   0.49811152
  0.38000000   0.49811152
  0.38000000   0.49811153
  0.38000000   0.49811153
  0.38000000   0.49811154
  0.38000000   0.49811154
  0.38000000   0.49811155
  0.38000000   0.49811156
  0.38000000   0.49811156
  0.38000000   0.49811157
  0.38000000   0.49811157
  0.38000000   0.49811158
  0.38000000   0.49811158
  0.38000000   0.49811159
  0.38000000   0.49811159
  0.38000000   0.49811160
  0.38000000   0.49811160
  0.38000000   0.49811161
  0.38000000   0.49811161
  0.38000000   0.49811162
  0.38000000   0.49811162
  0.38000000   0.49811163
  0.38000000   0.49811163
  0.38000000   0.49811164
  0.38000000   0.49811164
  0.38000000   0.49811165
  0.38000000   0.49811165
  0.38000000   0.49811166
  0.38000000   0.49811166
  0.38000000   0.49811167
  0.38000000   0.49811167
  0.38000000   0.49811168
  0.38100000   0.49867817
  0.38100000   0.49867818
  0.38100000   0.49867818
  0.38100000   0.49867819
  0.38100000   0.49867819
  0.38100000   0.49867820
  0.38100000   0.49867820
  0.38100000   0.49867821
  0.38100000   0.49867821
  0.38100000   0.49867822
  0.38100000   0.49867823
  0.38100000   0.49867823
  0.38100000   0.49867824
  0.38100000   0.49867824
  0.38100000   0.49867825
  0.38100000   0.49867825
  0.38100000   0.49867826
  0.38100000   0.49867826
  0.38100000   0.49867827
  0.38100000   0.49867827
  0.38100000   0.49867828
  0.38100000   0.49867828
  0.38100000   0.49867829
  0.38100000   0.49867829
  0.38100000   0.49867830
  0.38100000   0.49867830
  0.38100000   0.49867831
  0.38100000   0.49867831
  0.38100000   0.49867832
  0.38100000   0.49867832
  0.38100000   0.49867833
  0.38100000   0.49867833
  0.38100000   0.49867834
  0.38100000   0.49867834
  0.38100000   0.49867835
  0.38100000   0.49867835
  0.38100000   0.49867836
  0.38100000   0.49867836
  0.38100000   0.49867837
  0.38100000   0.49867837
  0.38200000   0.49924337
  0.38200000   0.49924338
  0.38200000   0.49924339
  0.38200000   0.49924339
  0.38200000   0.49924340
  0.38200000   0.49924340
  0.38200000   0.49924341
  0.38200000   0.49924341
  0.38200000   0.49924342
  0.38200000   0.49924342
  0.38200000   0.49924343
  0.38200000   0.49924343
  0.38200000   0.49924344
  0.38200000   0.49924344
  0.38200000   0.49924345
  0.38200000   0.49924346
  0.38200000   0.49924346
  0.38200000   0.49924347
  0.38200000   0.49924347
  0.38200000   0.49924348
  0.38200000   0.49924348
  0.38200000   0.49924349
  0.38200000   0.49924349
  0.38200000   0.49924350
  0.38200000   0.49924350
  0.38200000   0.49924351
  0.38200000   0.49924351
  0.38200000   0.49924352
  0.38200000   0.49924352
  0.38200000   0.49924353
  0.38200000   0.49924353
  0.38200000   0.49924354
  0.38200000   0.49924354
  0.38200000   0.49924355
  0.38200000   0.49924355
  0.38200000   0.49924356
  0.38200000   0.49924356
  0.38200000   0.49924357
  0.38200000   0.49924357
  0.38200000   0.49924358
  0.38300000   0.49980709
  0.38300000   0.49980710
  0.38300000   0.49980710
  0.38300000   0.49980711
  0.38300000   0.49980711
  0.38300000   0.49980712
  0.38300000   0.49980712
  0.38300000   0.49980713
  0.38300000   0.49980714
  0.38300000   0.49980714
  0.38300000   0.49980715
  0.38300000   0.49980715
  0.38300000   0.49980716
  0.38300000   0.49980716
  0.38300000   0.49980717
  0.38300000   0.49980717
  0.38300000   0.49980718
  0.38300000   0.49980718
  0.38300000   0.49980719
  0.38300000   0.49980719
  0.38300000   0.49980720
  0.38300000   0.49980720
  0.38300000   0.49980721
  0.38300000   0.49980721
  0.38300000   0.49980722
  0.38300000   0.49980723
  0.38300000   0.49980723
  0.38300000   0.49980724
  0.38300000   0.49980724
  0.38300000   0.49980725
  0.38300000   0.49980725
  0.38300000   0.49980726
  0.38300000   0.49980726
  0.38300000   0.49980727
  0.38300000   0.49980727
  0.38300000   0.49980728
  0.38300000   0.49980728
  0.38300000   0.49980729
  0.38300000   0.49980729
  0.38300000   0.49980730
  0.38400000   0.50036933
  0.38400000   0.50036934
  0.38400000   0.50036934
  0.38400000   0.50036935
  0.38400000   0.50036935
  0.38400000   0.50036936
  0.38400000   0.50036936
  0.38400000   0.50036937
  0.38400000   0.50036937
  0.38400000   0.50036938
  0.38400000   0.50036939
  0.38400000   0.50036939
  0.38400000   0.50036940
  0.38400000   0.50036940
  0.38400000   0.50036941
  0.38400000   0.50036941
  0.38400000   0.50036942
  0.38400000   0.50036942
  0.38400000   0.50036943
  0.38400000   0.50036943
  0.38400000   0.50036944
  0.38400000   0.50036944
  0.38400000   0.50036945
  0.38400000   0.50036945
  0.38400000   0.50036946
  0.38400000   0.50036946
  0.38400000   0.50036947
  0.38400000   0.50036948
  0.38400000   0.50036948
  0.38400000   0.50036949
  0.38400000   0.50036949
  0.38400000   0.50036950
  0.38400000   0.50036950
  0.38400000   0.50036951
  0.38400000   0.50036951
  0.38400000   0.50036952
  0.38400000   0.50036952
  0.38400000   0.50036953
  0.38400000   0.50036953
  0.38400000   0.50036954
  0.38500000   0.50093010
  0.38500000   0.50093010
  0.38500000   0.50093011
  0.38500000   0.50093011
  0.38500000   0.50093012
  0.38500000   0.50093013
  0.38500000   0.50093013
  0.38500000   0.50093014
  0.38500000   0.50093014
  0.38500000   0.50093015
  0.38500000   0.50093015
  0.38500000   0.50093016
  0.38500000   0.50093016
  0.38500000   0.50093017
  0.38500000   0.50093017
  0.38500000   0.50093018
  0.38500000   0.50093018
  0.38500000   0.50093019
  0.38500000   0.50093020
  0.38500000   0.50093020
  0.38500000   0.50093021
  0.38500000   0.50093021
  0.38500000   0.50093022
  0.38500000   0.50093022
  0.38500000   0.50093023
  0.38500000   0.50093023
  0.38500000   0.50093024
  0.38500000   0.50093024
  0.38500000   0.50093025
  0.38500000   0.50093025
  0.38500000   0.50093026
  0.38500000   0.50093026
  0.38500000   0.50093027
  0.38500000   0.50093027
  0.38500000   0.50093028
  0.38500000   0.50093028
  0.38500000   0.50093029
  0.38500000   0.50093029
  0.38500000   0.50093030
  0.38500000   0.50093030
  0.38600000   0.50148940
  0.38600000   0.50148941
  0.38600000   0.50148941
  0.38600000   0.50148942
  0.38600000   0.50148942
  0.38600000   0.50148943
  0.38600000   0.50148943
  0.38600000   0.50148944
  0.38600000   0.50148944
  0.38600000   0.50148945
  0.38600000   0.50148946
  0.38600000   0.50148946
  0.38600000   0.50148947
  0.38600000   0.50148947
  0.38600000   0.50148948
  0.38600000   0.50148948
  0.38600000   0.50148949
  0.38600000   0.50148949
  0.38600000   0.50148950
  0.38600000   0.50148950
  0.38600000   0.50148951
  0.38600000   0.50148951
  0.38600000   0.50148952
  0.38600000   0.50148952
  0.38600000   0.50148953
  0.38600000   0.50148953
  0.38600000   0.50148954
  0.38600000   0.50148955
  0.38600000   0.50148955
  0.38600000   0.50148956
  0.38600000   0.50148956
  0.38600000   0.50148957
  0.38600000   0.50148957
  0.38600000   0.50148958
  0.38600000   0.50148958
  0.38600000   0.50148959
  0.38600000   0.50148959
  0.38600000   0.50148960
  0.38600000   0.50148960
  0.38600000   0.50148961
  0.38700000   0.50204724
  0.38700000   0.50204725
  0.38700000   0.50204726
  0.38700000   0.50204726
  0.38700000   0.50204727
  0.38700000   0.50204727
  0.38700000   0.50204728
  0.38700000   0.50204728
  0.38700000   0.50204729
  0.38700000   0.50204729
  0.38700000   0.50204730
  0.38700000   0.50204730
  0.38700000   0.50204731
  0.38700000   0.50204732
  0.38700000   0.50204732
  0.38700000   0.50204733
  0.38700000   0.50204733
  0.38700000   0.50204734
  0.38700000   0.50204734
  0.38700000   0.50204735
  0.38700000   0.50204735
  0.38700000   0.50204736
  0.38700000   0.50204736
  0.38700000   0.50204737
  0.38700000   0.50204737
  0.38700000   0.50204738
  0.38700000   0.50204738
  0.38700000   0.50204739
  0.38700000   0.50204739
  0.38700000   0.50204740
  0.38700000   0.50204740
  0.38700000   0.50204741
  0.38700000   0.50204742
  0.38700000   0.50204742
  0.38700000   0.50204743
  0.38700000   0.50204743
  0.38700000   0.50204744
  0.38700000   0.50204744
  0.38700000   0.50204745
  0.38700000   0.50204745
  0.38800000   0.50260364
  0.38800000   0.50260364
  0.38800000   0.50260365
  0.38800000   0.50260365
  0.38800000   0.50260366
  0.38800000   0.50260366
  0.38800000   0.50260367
  0.38800000   0.50260368
  0.38800000   0.50260368
  0.38800000   0.50260369
  0.38800000   0.50260369
  0.38800000   0.50260370
  0.38800000   0.50260370
  0.38800000   0.50260371
  0.38800000   0.50260371
  0.38800000   0.50260372
  0.38800000   0.50260372
  0.38800000   0.50260373
  0.38800000   0.50260373
  0.38800000   0.50260374
  0.38800000   0.50260375
  0.38800000   0.50260375
  0.38800000   0.50260376
  0.38800000   0.50260376
  0.38800000   0.50260377
  0.38800000   0.50260377
  0.38800000   0.50260378
  0.38800000   0.50260378
  0.38800000   0.50260379
  0.38800000   0.50260379
  0.38800000   0.50260380
  0.38800000   0.50260380
  0.38800000   0.50260381
  0.38800000   0.50260381
  0.38800000   0.50260382
  0.38800000   0.50260382
  0.38800000   0.50260383
  0.38800000   0.50260383
  0.38800000   0.50260384
  0.38800000   0.50260384
  0.38900000   0.50315858
  0.38900000   0.50315859
  0.38900000   0.50315860
  0.38900000   0.50315860
  0.38900000   0.50315861
  0.38900000   0.50315861
  0.38900000   0.50315862
  0.38900000   0.50315862
  0.38900000   0.50315863
  0.38900000   0.50315863
  0.38900000   0.50315864
  0.38900000   0.50315864
  0.38900000   0.50315865
  0.38900000   0.50315866
  0.38900000   0.50315866
  0.38900000   0.50315867
  0.38900000   0.50315867
  0.38900000   0.50315868
  0.38900000   0.50315868
  0.38900000   0.50315869
  0.38900000   0.50315869
  0.38900000   0.50315870
  0.38900000   0.50315870
  0.38900000   0.50315871
  0.38900000   0.50315871
  0.38900000   0.50315872
  0.38900000   0.50315872
  0.38900000   0.50315873
  0.38900000   0.50315873
  0.38900000   0.50315874
  0.38900000   0.50315875
  0.38900000   0.50315875
  0.38900000   0.50315876
  0.38900000   0.50315876
  0.38900000   0.50315877
  0.38900000   0.50315877
  0.38900000   0.50315878
  0.38900000   0.50315878
  0.38900000   0.50315879
  0.38900000   0.50315879
  0.39000000   0.50371209
  0.39000000   0.50371210
  0.39000000   0.50371210
  0.39000000   0.50371211
  0.39000000   0.50371212
  0.39000000   0.50371212
  0.39000000   0.50371213
  0.39000000   0.50371213
  0.39000000   0.50371214
  0.39000000   0.50371214
  0.39000000   0.50371215
  0.39000000   0.50371215
  0.39000000   0.50371216
  0.39000000   0.50371216
  0.39000000   0.50371217
  0.39000000   0.50371218
  0.39000000   0.50371218
  0.39000000   0.50371219
  0.39000000   0.50371219
  0.39000000   0.50371220
  0.39000000   0.50371220
  0.39000000   0.50371221
  0.39000000   0.50371221
  0.39000000   0.50371222
  0.39000000   0.50371222
  0.39000000   0.50371223
  0.39000000   0.50371223
  0.39000000   0.50371224
  0.39000000   0.50371224
  0.39000000   0.50371225
  0.39000000   0.50371225
  0.39000000   0.50371226
  0.39000000   0.50371227
  0.39000000   0.50371227
  0.39000000   0.50371228
  0.39000000   0.50371228
  0.39000000   0.50371229
  0.39000000   0.50371229
  0.39000000   0.50371230
  0.39000000   0.50371230
  0.39100000   0.50426417
  0.39100000   0.50426418
  0.39100000   0.50426418
  0.39100000   0.50426419
  0.39100000   0.50426419
  0.39100000   0.50426420
  0.39100000   0.50426420
  0.39100000   0.50426421
  0.39100000   0.50426422
  0.39100000   0.50426422
  0.39100000   0.50426423
  0.39100000   0.50426423
  0.39100000   0.50426424
  0.39100000   0.50426424
  0.39100000   0.50426425
  0.39100000   0.50426425
  0.39100000   0.50426426
  0.39100000   0.50426426
  0.39100000   0.50426427
  0.39100000   0.50426427
  0.39100000   0.50426428
  0.39100000   0.50426429
  0.39100000   0.50426429
  0.39100000   0.50426430
  0.39100000   0.50426430
  0.39100000   0.50426431
  0.39100000   0.50426431
  0.39100000   0.50426432
  0.39100000   0.50426432
  0.39100000   0.50426433
  0.39100000   0.50426433
  0.39100000   0.50426434
  0.39100000   0.50426434
  0.39100000   0.50426435
  0.39100000   0.50426435
  0.39100000   0.50426436
  0.39100000   0.50426436
  0.39100000   0.50426437
  0.39100000   0.50426437
  0.39100000   0.50426438
  0.39200000   0.50481482
  0.39200000   0.50481483
  0.39200000   0.50481483
  0.39200000   0.50481484
  0.39200000   0.50481485
  0.39200000   0.50481485
  0.39200000   0.50481486
  0.39200000   0.50481486
  0.39200000   0.50481487
  0.39200000   0.50481487
  0.39200000   0.50481488
  0.39200000   0.50481488
  0.39200000   0.50481489
  0.39200000   0.50481489
  0.39200000   0.50481490
  0.39200000   0.50481491
  0.39200000   0.50481491
  0.39200000   0.50481492
  0.39200000   0.50481492
  0.39200000   0.50481493
  0.39200000   0.50481493
  0.39200000   0.50481494
  0.39200000   0.50481494
  0.39200000   0.50481495
  0.39200000   0.50481495
  0.39200000   0.50481496
  0.39200000   0.50481496
  0.39200000   0.50481497
  0.39200000   0.50481498
  0.39200000   0.50481498
  0.39200000   0.50481499
  0.39200000   0.50481499
  0.39200000   0.50481500
  0.39200000   0.50481500
  0.39200000   0.50481501
  0.39200000   0.50481501
  0.39200000   0.50481502
  0.39200000   0.50481502
  0.39200000   0.50481503
  0.39200000   0.50481503
  0.39300000   0.50536406
  0.39300000   0.50536406
  0.39300000   0.50536407
  0.39300000   0.50536407
  0.39300000   0.50536408
  0.39300000   0.50536408
  0.39300000   0.50536409
  0.39300000   0.50536410
  0.39300000   0.50536410
  0.39300000   0.50536411
  0.39300000   0.50536411
  0.39300000   0.50536412
  0.39300000   0.50536412
  0.39300000   0.50536413
  0.39300000   0.50536413
  0.39300000   0.50536414
  0.39300000   0.50536415
  0.39300000   0.50536415
  0.39300000   0.50536416
  0.39300000   0.50536416
  0.39300000   0.50536417
  0.39300000   0.50536417
  0.39300000   0.50536418
  0.39300000   0.50536418
  0.39300000   0.50536419
  0.39300000   0.50536419
  0.39300000   0.50536420
  0.39300000   0.50536420
  0.39300000   0.50536421
  0.39300000   0.50536421
  0.39300000   0.50536422
  0.39300000   0.50536423
  0.39300000   0.50536423
  0.39300000   0.50536424
  0.39300000   0.50536424
  0.39300000   0.50536425
  0.39300000   0.50536425
  0.39300000   0.50536426
  0.39300000   0.50536426
  0.39300000   0.50536427
  0.39400000   0.50591188
  0.39400000   0.50591188
  0.39400000   0.50591189
  0.39400000   0.50591190
  0.39400000   0.50591190
  0.39400000   0.50591191
  0.39400000   0.50591191
  0.39400000   0.50591192
  0.39400000   0.50591192
  0.39400000   0.50591193
  0.39400000   0.50591193
  0.39400000   0.50591194
  0.39400000   0.50591195
  0.39400000   0.50591195
  0.39400000   0.50591196
  0.39400000   0.50591196
  0.39400000   0.50591197
  0.39400000   0.50591197
  0.39400000   0.50591198
  0.39400000   0.50591198
  0.39400000   0.50591199
  0.39400000   0.50591199
  0.39400000   0.50591200
  0.39400000   0.50591200
  0.39400000   0.50591201
  0.39400000   0.50591202
  0.39400000   0.50591202
  0.39400000   0.50591203
  0.39400000   0.50591203
  0.39400000   0.50591204
  0.39400000   0.50591204
  0.39400000   0.50591205
  0.39400000   0.50591205
  0.39400000   0.50591206
  0.39400000   0.50591206
  0.39400000   0.50591207
  0.39400000   0.50591207
  0.39400000   0.50591208
  0.39400000   0.50591208
  0.39400000   0.50591209
  0.39500000   0.50645829
  0.39500000   0.50645830
  0.39500000   0.50645831
  0.39500000   0.50645831
  0.39500000   0.50645832
  0.39500000   0.50645832
  0.39500000   0.50645833
  0.39500000   0.50645833
  0.39500000   0.50645834
  0.39500000   0.50645834
  0.39500000   0.50645835
  0.39500000   0.50645836
  0.39500000   0.50645836
  0.39500000   0.50645837
  0.39500000   0.50645837
  0.39500000   0.50645838
  0.39500000   0.50645838
  0.39500000   0.50645839
  0.39500000   0.50645839
  0.39500000   0.50645840
  0.39500000   0.50645840
  0.39500000   0.50645841
  0.39500000   0.50645842
  0.39500000   0.50645842
  0.39500000   0.50645843
  0.39500000   0.50645843
  0.39500000   0.50645844
  0.39500000   0.50645844
  0.39500000   0.50645845
  0.39500000   0.50645845
  0.39500000   0.50645846
  0.39500000   0.50645846
  0.39500000   0.50645847
  0.39500000   0.50645847
  0.39500000   0.50645848
  0.39500000   0.50645848
  0.39500000   0.50645849
  0.39500000   0.50645850
  0.39500000   0.50645850
  0.39500000   0.50645851
  0.39600000   0.50700331
  0.39600000   0.50700332
  0.39600000   0.50700332
  0.39600000   0.50700333
  0.39600000   0.50700333
  0.39600000   0.50700334
  0.39600000   0.50700334
  0.39600000   0.50700335
  0.39600000   0.50700336
  0.39600000   0.50700336
  0.39600000   0.50700337
  0.39600000   0.50700337
  0.39600000   0.50700338
  0.39600000   0.50700338
  0.39600000   0.50700339
  0.39600000   0.50700339
  0.39600000   0.50700340
  0.39600000   0.50700341
  0.39600000   0.50700341
  0.39600000   0.50700342
  0.39600000   0.50700342
  0.39600000   0.50700343
  0.39600000   0.50700343
  0.39600000   0.50700344
  0.39600000   0.50700344
  0.39600000   0.50700345
  0.39600000   0.50700345
  0.39600000   0.50700346
  0.39600000   0.50700346
  0.39600000   0.50700347
  0.39600000   0.50700348
  0.39600000   0.50700348
  0.39600000   0.50700349
  0.39600000   0.50700349
  0.39600000   0.50700350
  0.39600000   0.50700350
  0.39600000   0.50700351
  0.39600000   0.50700351
  0.39600000   0.50700352
  0.39600000   0.50700352
  0.39700000   0.50754693
  0.39700000   0.50754694
  0.39700000   0.50754695
  0.39700000   0.50754695
  0.39700000   0.50754696
  0.39700000   0.50754696
  0.39700000   0.50754697
  0.39700000   0.50754697
  0.39700000   0.50754698
  0.39700000   0.50754698
  0.39700000   0.50754699
  0.39700000   0.50754700
  0.39700000   0.50754700
  0.39700000   0.50754701
  0.39700000   0.50754701
  0.39700000   0.50754702
  0.39700000   0.50754702
  0.39700000   0.50754703
  0.39700000   0.50754703
  0.39700000   0.50754704
  0.39700000   0.50754705
  0.39700000   0.50754705
  0.39700000   0.50754706
  0.39700000   0.50754706
  0.39700000   0.50754707
  0.39700000   0.50754707
  0.39700000   0.50754708
  0.39700000   0.50754708
  0.39700000   0.50754709
  0.39700000   0.50754709
  0.39700000   0.50754710
  0.39700000   0.50754710
  0.39700000   0.50754711
  0.39700000   0.50754711
  0.39700000   0.50754712
  0.39700000   0.50754713
  0.39700000   0.50754713
  0.39700000   0.50754714
  0.39700000   0.50754714
  0.39700000   0.50754715
  0.39800000   0.50808917
  0.39800000   0.50808918
  0.39800000   0.50808918
  0.39800000   0.50808919
  0.39800000   0.50808919
  0.39800000   0.50808920
  0.39800000   0.50808920
  0.39800000   0.50808921
  0.39800000   0.50808922
  0.39800000   0.50808922
  0.39800000   0.50808923
  0.39800000   0.50808923
  0.39800000   0.50808924
  0.39800000   0.50808924
  0.39800000   0.50808925
  0.39800000   0.50808925
  0.39800000   0.50808926
  0.39800000   0.50808927
  0.39800000   0.50808927
  0.39800000   0.50808928
  0.39800000   0.50808928
  0.39800000   0.50808929
  0.39800000   0.50808929
  0.39800000   0.50808930
  0.39800000   0.50808930
  0.39800000   0.50808931
  0.39800000   0.50808931
  0.39800000   0.50808932
  0.39800000   0.50808933
  0.39800000   0.50808933
  0.39800000   0.50808934
  0.39800000   0.50808934
  0.39800000   0.50808935
  0.39800000   0.50808935
  0.39800000   0.50808936
  0.39800000   0.50808936
  0.39800000   0.50808937
  0.39800000   0.50808937
  0.39800000   0.50808938
  0.39800000   0.50808938
  0.39900000   0.50863003
  0.39900000   0.50863003
  0.39900000   0.50863004
  0.39900000   0.50863004
  0.39900000   0.50863005
  0.39900000   0.50863005
  0.39900000   0.50863006
  0.39900000   0.50863007
  0.39900000   0.50863007
  0.39900000   0.50863008
  0.39900000   0.50863008
  0.39900000   0.50863009
  0.39900000   0.50863009
  0.39900000   0.50863010
  0.39900000   0.50863011
  0.39900000   0.50863011
  0.39900000   0.50863012
  0.39900000   0.50863012
  0.39900000   0.50863013
  0.39900000   0.50863013
  0.39900000   0.50863014
  0.39900000   0.50863014
  0.39900000   0.50863015
  0.39900000   0.50863015
  0.39900000   0.50863016
  0.39900000   0.50863017
  0.39900000   0.50863017
  0.39900000   0.50863018
  0.39900000   0.50863018
  0.39900000   0.50863019
  0.39900000   0.50863019
  0.39900000   0.50863020
  0.39900000   0.50863020
  0.39900000   0.50863021
  0.39900000   0.50863021
  0.39900000   0.50863022
  0.39900000   0.50863022
  0.39900000   0.50863023
  0.39900000   0.50863023
  0.39900000   0.50863024
  0.40000000   0.50916951
  0.40000000   0.50916951
  0.40000000   0.50916952
  0.40000000   0.50916953
  0.40000000   0.50916953
  0.40000000   0.50916954
  0.40000000   0.50916954
  0.40000000   0.50916955
  0.40000000   0.50916955
  0.40000000   0.50916956
  0.40000000   0.50916956
  0.40000000   0.50916957
  0.40000000   0.50916958
  0.40000000   0.50916958
  0.40000000   0.50916959
  0.40000000   0.50916959
  0.40000000   0.50916960
  0.40000000   0.50916960
  0.40000000   0.50916961
  0.40000000   0.50916961
  0.40000000   0.50916962
  0.40000000   0.50916963
  0.40000000   0.50916963
  0.40000000   0.50916964
  0.40000000   0.50916964
  0.40000000   0.50916965
  0.40000000   0.50916965
  0.40000000   0.50916966
  0.40000000   0.50916966
  0.40000000   0.50916967
  0.40000000   0.50916967
  0.40000000   0.50916968
  0.40000000   0.50916968
  0.40000000   0.50916969
  0.40000000   0.50916970
  0.40000000   0.50916970
  0.40000000   0.50916971
  0.40000000   0.50916971
  0.40000000   0.50916972
  0.40000000   0.50916972
  0.40100000   0.50970762
  0.40100000   0.50970763
  0.40100000   0.50970763
  0.40100000   0.50970764
  0.40100000   0.50970764
  0.40100000   0.50970765
  0.40100000   0.50970766
  0.40100000   0.50970766
  0.40100000   0.50970767
  0.40100000   0.50970767
  0.40100000   0.50970768
  0.40100000   0.50970768
  0.40100000   0.50970769
  0.40100000   0.50970769
  0.40100000   0.50970770
  0.40100000   0.50970771
  0.40100000   0.50970771
  0.40100000   0.50970772
  0.40100000   0.50970772
  0.40100000   0.50970773
  0.40100000   0.50970773
  0.40100000   0.50970774
  0.40100000   0.50970774
  0.40100000   0.50970775
  0.40100000   0.50970776
  0.40100000   0.50970776
  0.40100000   0.50970777
  0.40100000   0.50970777
  0.40100000   0.50970778
  0.40100000   0.50970778
  0.40100000   0.50970779
  0.40100000   0.50970779
  0.40100000   0.50970780
  0.40100000   0.50970780
  0.40100000   0.50970781
  0.40100000   0.50970781
  0.40100000   0.50970782
  0.40100000   0.50970782
  0.40100000   0.50970783
  0.40100000   0.50970784
  0.40200000   0.51024437
  0.40200000   0.51024438
  0.40200000   0.51024438
  0.40200000   0.51024439
  0.40200000   0.51024440
  0.40200000   0.51024440
  0.40200000   0.51024441
  0.40200000   0.51024441
  0.40200000   0.51024442
  0.40200000   0.51024442
  0.40200000   0.51024443
  0.40200000   0.51024443
  0.40200000   0.51024444
  0.40200000   0.51024445
  0.40200000   0.51024445
  0.40200000   0.51024446
  0.40200000   0.51024446
  0.40200000   0.51024447
  0.40200000   0.51024447
  0.40200000   0.51024448
  0.40200000   0.51024448
  0.40200000   0.51024449
  0.40200000   0.51024450
  0.40200000   0.51024450
  0.40200000   0.51024451
  0.40200000   0.51024451
  0.40200000   0.51024452
  0.40200000   0.51024452
  0.40200000   0.51024453
  0.40200000   0.51024453
  0.40200000   0.51024454
  0.40200000   0.51024454
  0.40200000   0.51024455
  0.40200000   0.51024455
  0.40200000   0.51024456
  0.40200000   0.51024457
  0.40200000   0.51024457
  0.40200000   0.51024458
  0.40200000   0.51024458
  0.40200000   0.51024459
  0.40300000   0.51077977
  0.40300000   0.51077977
  0.40300000   0.51077978
  0.40300000   0.51077978
  0.40300000   0.51077979
  0.40300000   0.51077980
  0.40300000   0.51077980
  0.40300000   0.51077981
  0.40300000   0.51077981
  0.40300000   0.51077982
  0.40300000   0.51077982
  0.40300000   0.51077983
  0.40300000   0.51077984
  0.40300000   0.51077984
  0.40300000   0.51077985
  0.40300000   0.51077985
  0.40300000   0.51077986
  0.40300000   0.51077986
  0.40300000   0.51077987
  0.40300000   0.51077987
  0.40300000   0.51077988
  0.40300000   0.51077988
  0.40300000   0.51077989
  0.40300000   0.51077990
  0.40300000   0.51077990
  0.40300000   0.51077991
  0.40300000   0.51077991
  0.40300000   0.51077992
  0.40300000   0.51077992
  0.40300000   0.51077993
  0.40300000   0.51077993
  0.40300000   0.51077994
  0.40300000   0.51077994
  0.40300000   0.51077995
  0.40300000   0.51077996
  0.40300000   0.51077996
  0.40300000   0.51077997
  0.40300000   0.51077997
  0.40300000   0.51077998
  0.40300000   0.51077998
  0.40400000   0.51131381
  0.40400000   0.51131382
  0.40400000   0.51131382
  0.40400000   0.51131383
  0.40400000   0.51131383
  0.40400000   0.51131384
  0.40400000   0.51131385
  0.40400000   0.51131385
  0.40400000   0.51131386
  0.40400000   0.51131386
  0.40400000   0.51131387
  0.40400000   0.51131387
  0.40400000   0.51131388
  0.40400000   0.51131389
  0.40400000   0.51131389
  0.40400000   0.51131390
  0.40400000   0.51131390
  0.40400000   0.51131391
  0.40400000   0.51131391
  0.40400000   0.51131392
  0.40400000   0.51131392
  0.40400000   0.51131393
  0.40400000   0.51131394
  0.40400000   0.51131394
  0.40400000   0.51131395
  0.40400000   0.51131395
  0.40400000   0.51131396
  0.40400000   0.51131396
  0.40400000   0.51131397
  0.40400000   0.51131397
  0.40400000   0.51131398
  0.40400000   0.51131398
  0.40400000   0.51131399
  0.40400000   0.51131400
  0.40400000   0.51131400
  0.40400000   0.51131401
  0.40400000   0.51131401
  0.40400000   0.51131402
  0.40400000   0.51131402
  0.40400000   0.51131403
  0.40500000   0.51184651
  0.40500000   0.51184652
  0.40500000   0.51184652
  0.40500000   0.51184653
  0.40500000   0.51184654
  0.40500000   0.51184654
  0.40500000   0.51184655
  0.40500000   0.51184655
  0.40500000   0.51184656
  0.40500000   0.51184656
  0.40500000   0.51184657
  0.40500000   0.51184657
  0.40500000   0.51184658
  0.40500000   0.51184659
  0.40500000   0.51184659
  0.40500000   0.51184660
  0.40500000   0.51184660
  0.40500000   0.51184661
  0.40500000   0.51184661
  0.40500000   0.51184662
  0.40500000   0.51184663
  0.40500000   0.51184663
  0.40500000   0.51184664
  0.40500000   0.51184664
  0.40500000   0.51184665
  0.40500000   0.51184665
  0.40500000   0.51184666
  0.40500000   0.51184666
  0.40500000   0.51184667
  0.40500000   0.51184667
  0.40500000   0.51184668
  0.40500000   0.51184669
  0.40500000   0.51184669
  0.40500000   0.51184670
  0.40500000   0.51184670
  0.40500000   0.51184671
  0.40500000   0.51184671
  0.40500000   0.51184672
  0.40500000   0.51184672
  0.40500000   0.51184673
  0.40600000   0.51237787
  0.40600000   0.51237788
  0.40600000   0.51237789
  0.40600000   0.51237789
  0.40600000   0.51237790
  0.40600000   0.51237790
  0.40600000   0.51237791
  0.40600000   0.51237791
  0.40600000   0.51237792
  0.40600000   0.51237793
  0.40600000   0.51237793
  0.40600000   0.51237794
  0.40600000   0.51237794
  0.40600000   0.51237795
  0.40600000   0.51237795
  0.40600000   0.51237796
  0.40600000   0.51237797
  0.40600000   0.51237797
  0.40600000   0.51237798
  0.40600000   0.51237798
  0.40600000   0.51237799
  0.40600000   0.51237799
  0.40600000   0.51237800
  0.40600000   0.51237800
  0.40600000   0.51237801
  0.40600000   0.51237802
  0.40600000   0.51237802
  0.40600000   0.51237803
  0.40600000   0.51237803
  0.40600000   0.51237804
  0.40600000   0.51237804
  0.40600000   0.51237805
  0.40600000   0.51237805
  0.40600000   0.51237806
  0.40600000   0.51237806
  0.40600000   0.51237807
  0.40600000   0.51237808
  0.40600000   0.51237808
  0.40600000   0.51237809
  0.40600000   0.51237809
  0.40700000   0.51290790
  0.40700000   0.51290791
  0.40700000   0.51290792
  0.40700000   0.51290792
  0.40700000   0.51290793
  0.40700000   0.51290793
  0.40700000   0.51290794
  0.40700000   0.51290794
  0.40700000   0.51290795
  0.40700000   0.51290796
  0.40700000   0.51290796
  0.40700000   0.51290797
  0.40700000   0.51290797
  0.40700000   0.51290798
  0.40700000   0.51290798
  0.40700000   0.51290799
  0.40700000   0.51290800
  0.40700000   0.51290800
  0.40700000   0.51290801
  0.40700000   0.51290801
  0.40700000   0.51290802
  0.40700000   0.51290802
  0.40700000   0.51290803
  0.40700000   0.51290803
  0.40700000   0.51290804
  0.40700000   0.51290805
  0.40700000   0.51290805
  0.40700000   0.51290806
  0.40700000   0.51290806
  0.40700000   0.51290807
  0.40700000   0.51290807
  0.40700000   0.51290808
  0.40700000   0.51290808
  0.40700000   0.51290809
  0.40700000   0.51290809
  0.40700000   0.51290810
  0.40700000   0.51290811
  0.40700000   0.51290811
  0.40700000   0.51290812
  0.40700000   0.51290812
  0.40800000   0.51343661
  0.40800000   0.51343661
  0.40800000   0.51343662
  0.40800000   0.51343663
  0.40800000   0.51343663
  0.40800000   0.51343664
  0.40800000   0.51343664
  0.40800000   0.51343665
  0.40800000   0.51343665
  0.40800000   0.51343666
  0.40800000   0.51343667
  0.40800000   0.51343667
  0.40800000   0.51343668
  0.40800000   0.51343668
  0.40800000   0.51343669
  0.40800000   0.51343669
  0.40800000   0.51343670
  0.40800000   0.51343670
  0.40800000   0.51343671
  0.40800000   0.51343672
  0.40800000   0.51343672
  0.40800000   0.51343673
  0.40800000   0.51343673
  0.40800000   0.51343674
  0.40800000   0.51343674
  0.40800000   0.51343675
  0.40800000   0.51343675
  0.40800000   0.51343676
  0.40800000   0.51343677
  0.40800000   0.51343677
  0.40800000   0.51343678
  0.40800000   0.51343678
  0.40800000   0.51343679
  0.40800000   0.51343679
  0.40800000   0.51343680
  0.40800000   0.51343680
  0.40800000   0.51343681
  0.40800000   0.51343681
  0.40800000   0.51343682
  0.40800000   0.51343683
  0.40900000   0.51396399
  0.40900000   0.51396400
  0.40900000   0.51396400
  0.40900000   0.51396401
  0.40900000   0.51396401
  0.40900000   0.51396402
  0.40900000   0.51396403
  0.40900000   0.51396403
  0.40900000   0.51396404
  0.40900000   0.51396404
  0.40900000   0.51396405
  0.40900000   0.51396405
  0.40900000   0.51396406
  0.40900000   0.51396407
  0.40900000   0.51396407
  0.40900000   0.51396408
  0.40900000   0.51396408
  0.40900000   0.51396409
  0.40900000   0.51396409
  0.40900000   0.51396410
  0.40900000   0.51396410
  0.40900000   0.51396411
  0.40900000   0.51396412
  0.40900000   0.51396412
  0.40900000   0.51396413
  0.40900000   0.51396413
  0.40900000   0.51396414
  0.40900000   0.51396414
  0.40900000   0.51396415
  0.40900000   0.51396415
  0.40900000   0.51396416
  0.40900000   0.51396417
  0.40900000   0.51396417
  0.40900000   0.51396418
  0.40900000   0.51396418
  0.40900000   0.51396419
  0.40900000   0.51396419
  0.40900000   0.51396420
  0.40900000   0.51396420
  0.40900000   0.51396421
  0.41000000   0.51449006
  0.41000000   0.51449006
  0.41000000   0.51449007
  0.41000000   0.51449008
  0.41000000   0.51449008
  0.41000000   0.51449009
  0.41000000   0.51449009
  0.41000000   0.51449010
  0.41000000   0.51449010
  0.41000000   0.51449011
  0.41000000   0.51449012
  0.41000000   0.51449012
  0.41000000   0.51449013
  0.41000000   0.51449013
  0.41000000   0.51449014
  0.41000000   0.51449014
  0.41000000   0.51449015
  0.41000000   0.51449016
  0.41000000   0.51449016
  0.41000000   0.51449017
  0.41000000   0.51449017
  0.41000000   0.51449018
  0.41000000   0.51449018
  0.41000000   0.51449019
  0.41000000   0.51449019
  0.41000000   0.51449020
  0.41000000   0.51449021
  0.41000000   0.51449021
  0.41000000   0.51449022
  0.41000000   0.51449022
  0.41000000   0.51449023
  0.41000000   0.51449023
  0.41000000   0.51449024
  0.41000000   0.51449024
  0.41000000   0.51449025
  0.41000000   0.51449026
  0.41000000   0.51449026
  0.41000000   0.51449027
  0.41000000   0.51449027
  0.41000000   0.51449028
  0.41100000   0.51501482
  0.41100000   0.51501482
  0.41100000   0.51501483
  0.41100000   0.51501483
  0.41100000   0.51501484
  0.41100000   0.51501485
  0.41100000   0.51501485
  0.41100000   0.51501486
  0.41100000   0.51501486
  0.41100000   0.51501487
  0.41100000   0.51501487
  0.41100000   0.51501488
  0.41100000   0.51501489
  0.41100000   0.51501489
  0.41100000   0.51501490
  0.41100000   0.51501490
  0.41100000   0.51501491
  0.41100000   0.51501491
  0.41100000   0.51501492
  0.41100000   0.51501493
  0.41100000   0.51501493
  0.41100000   0.51501494
  0.41100000   0.51501494
  0.41100000   0.51501495
  0.41100000   0.51501495
  0.41100000   0.51501496
  0.41100000   0.51501497
  0.41100000   0.51501497
  0.41100000   0.51501498
  0.41100000   0.51501498
  0.41100000   0.51501499
  0.41100000   0.51501499
  0.41100000   0.51501500
  0.41100000   0.51501500
  0.41100000   0.51501501
  0.41100000   0.51501501
  0.41100000   0.51501502
  0.41100000   0.51501503
  0.41100000   0.51501503
  0.41100000   0.51501504
  0.41200000   0.51553827
  0.41200000   0.51553828
  0.41200000   0.51553828
  0.41200000   0.51553829
  0.41200000   0.51553830
  0.41200000   0.51553830
  0.41200000   0.51553831
  0.41200000   0.51553831
  0.41200000   0.51553832
  0.41200000   0.51553832
  0.41200000   0.51553833
  0.41200000   0.51553834
  0.41200000   0.51553834
  0.41200000   0.51553835
  0.41200000   0.51553835
  0.41200000   0.51553836
  0.41200000   0.51553836
  0.41200000   0.51553837
  0.41200000   0.51553838
  0.41200000   0.51553838
  0.41200000   0.51553839
  0.41200000   0.51553839
  0.41200000   0.51553840
  0.41200000   0.51553840
  0.41200000   0.51553841
  0.41200000   0.51553842
  0.41200000   0.51553842
  0.41200000   0.51553843
  0.41200000   0.51553843
  0.41200000   0.51553844
  0.41200000   0.51553844
  0.41200000   0.51553845
  0.41200000   0.51553845
  0.41200000   0.51553846
  0.41200000   0.51553846
  0.41200000   0.51553847
  0.41200000   0.51553848
  0.41200000   0.51553848
  0.41200000   0.51553849
  0.41200000   0.51553849
  0.41300000   0.51606043
  0.41300000   0.51606044
  0.41300000   0.51606044
  0.41300000   0.51606045
  0.41300000   0.51606045
  0.41300000   0.51606046
  0.41300000   0.51606046
  0.41300000   0.51606047
  0.41300000   0.51606048
  0.41300000   0.51606048
  0.41300000   0.51606049
  0.41300000   0.51606049
  0.41300000   0.51606050
  0.41300000   0.51606051
  0.41300000   0.51606051
  0.41300000   0.51606052
  0.41300000   0.51606052
  0.41300000   0.51606053
  0.41300000   0.51606053
  0.41300000   0.51606054
  0.41300000   0.51606054
  0.41300000   0.51606055
  0.41300000   0.51606056
  0.41300000   0.51606056
  0.41300000   0.51606057
  0.41300000   0.51606057
  0.41300000   0.51606058
  0.41300000   0.51606058
  0.41300000   0.51606059
  0.41300000   0.51606059
  0.41300000   0.51606060
  0.41300000   0.51606061
  0.41300000   0.51606061
  0.41300000   0.51606062
  0.41300000   0.51606062
  0.41300000   0.51606063
  0.41300000   0.51606063
  0.41300000   0.51606064
  0.41300000   0.51606064
  0.41300000   0.51606065
  0.41400000   0.51658129
  0.41400000   0.51658130
  0.41400000   0.51658131
  0.41400000   0.51658131
  0.41400000   0.51658132
  0.41400000   0.51658132
  0.41400000   0.51658133
  0.41400000   0.51658134
  0.41400000   0.51658134
  0.41400000   0.51658135
  0.41400000   0.51658135
  0.41400000   0.51658136
  0.41400000   0.51658136
  0.41400000   0.51658137
  0.41400000   0.51658138
  0.41400000   0.51658138
  0.41400000   0.51658139
  0.41400000   0.51658139
  0.41400000   0.51658140
  0.41400000   0.51658140
  0.41400000   0.51658141
  0.41400000   0.51658142
  0.41400000   0.51658142
  0.41400000   0.51658143
  0.41400000   0.51658143
  0.41400000   0.51658144
  0.41400000   0.51658144
  0.41400000   0.51658145
  0.41400000   0.51658145
  0.41400000   0.51658146
  0.41400000   0.51658147
  0.41400000   0.51658147
  0.41400000   0.51658148
  0.41400000   0.51658148
  0.41400000   0.51658149
  0.41400000   0.51658149
  0.41400000   0.51658150
  0.41400000   0.51658150
  0.41400000   0.51658151
  0.41400000   0.51658152
  0.41500000   0.51710087
  0.41500000   0.51710088
  0.41500000   0.51710089
  0.41500000   0.51710089
  0.41500000   0.51710090
  0.41500000   0.51710090
  0.41500000   0.51710091
  0.41500000   0.51710091
  0.41500000   0.51710092
  0.41500000   0.51710093
  0.41500000   0.51710093
  0.41500000   0.51710094
  0.41500000   0.51710094
  0.41500000   0.51710095
  0.41500000   0.51710095
  0.41500000   0.51710096
  0.41500000   0.51710097
  0.41500000   0.51710097
  0.41500000   0.51710098
  0.41500000   0.51710098
  0.41500000   0.51710099
  0.41500000   0.51710099
  0.41500000   0.51710100
  0.41500000   0.51710101
  0.41500000   0.51710101
  0.41500000   0.51710102
  0.41500000   0.51710102
  0.41500000   0.51710103
  0.41500000   0.51710103
  0.41500000   0.51710104
  0.41500000   0.51710104
  0.41500000   0.51710105
  0.41500000   0.51710106
  0.41500000   0.51710106
  0.41500000   0.51710107
  0.41500000   0.51710107
  0.41500000   0.51710108
  0.41500000   0.51710108
  0.41500000   0.51710109
  0.41500000   0.51710109
  0.41600000   0.51761917
  0.41600000   0.51761918
  0.41600000   0.51761918
  0.41600000   0.51761919
  0.41600000   0.51761919
  0.41600000   0.51761920
  0.41600000   0.51761921
  0.41600000   0.51761921
  0.41600000   0.51761922
  0.41600000   0.51761922
  0.41600000   0.51761923
  0.41600000   0.51761924
  0.41600000   0.51761924
  0.41600000   0.51761925
  0.41600000   0.51761925
  0.41600000   0.51761926
  0.41600000   0.51761926
  0.41600000   0.51761927
  0.41600000   0.51761928
  0.41600000   0.51761928
  0.41600000   0.51761929
  0.41600000   0.51761929
  0.41600000   0.51761930
  0.41600000   0.51761930
  0.41600000   0.51761931
  0.41600000   0.51761931
  0.41600000   0.51761932
  0.41600000   0.51761933
  0.41600000   0.51761933
  0.41600000   0.51761934
  0.41600000   0.51761934
  0.41600000   0.51761935
  0.41600000   0.51761935
  0.41600000   0.51761936
  0.41600000   0.51761936
  0.41600000   0.51761937
  0.41600000   0.51761938
  0.41600000   0.51761938
  0.41600000   0.51761939
  0.41600000   0.51761939
  0.41700000   0.51813619
  0.41700000   0.51813620
  0.41700000   0.51813620
  0.41700000   0.51813621
  0.41700000   0.51813622
  0.41700000   0.51813622
  0.41700000   0.51813623
  0.41700000   0.51813623
  0.41700000   0.51813624
  0.41700000   0.51813625
  0.41700000   0.51813625
  0.41700000   0.51813626
  0.41700000   0.51813626
  0.41700000   0.51813627
  0.41700000   0.51813627
  0.41700000   0.51813628
  0.41700000   0.51813629
  0.41700000   0.51813629
  0.41700000   0.51813630
  0.41700000   0.51813630
  0.41700000   0.51813631
  0.41700000   0.51813631
  0.41700000   0.51813632
  0.41700000   0.51813633
  0.41700000   0.51813633
  0.41700000   0.51813634
  0.41700000   0.51813634
  0.41700000   0.51813635
  0.41700000   0.51813635
  0.41700000   0.51813636
  0.41700000   0.51813637
  0.41700000   0.51813637
  0.41700000   0.51813638
  0.41700000   0.51813638
  0.41700000   0.51813639
  0.41700000   0.51813639
  0.41700000   0.51813640
  0.41700000   0.51813640
  0.41700000   0.51813641
  0.41700000   0.51813641
  0.41800000   0.51865194
  0.41800000   0.51865195
  0.41800000   0.51865196
  0.41800000   0.51865196
  0.41800000   0.51865197
  0.41800000   0.51865197
  0.41800000   0.51865198
  0.41800000   0.51865199
  0.41800000   0.51865199
  0.41800000   0.51865200
  0.41800000   0.51865200
  0.41800000   0.51865201
  0.41800000   0.51865202
  0.41800000   0.51865202
  0.41800000   0.51865203
  0.41800000   0.51865203
  0.41800000   0.51865204
  0.41800000   0.51865204
  0.41800000   0.51865205
  0.41800000   0.51865206
  0.41800000   0.51865206
  0.41800000   0.51865207
  0.41800000   0.51865207
  0.41800000   0.51865208
  0.41800000   0.51865208
  0.41800000   0.51865209
  0.41800000   0.51865209
  0.41800000   0.51865210
  0.41800000   0.51865211
  0.41800000   0.51865211
  0.41800000   0.51865212
  0.41800000   0.51865212
  0.41800000   0.51865213
  0.41800000   0.51865213
  0.41800000   0.51865214
  0.41800000   0.51865215
  0.41800000   0.51865215
  0.41800000   0.51865216
  0.41800000   0.51865216
  0.41800000   0.51865217
  0.41900000   0.51916643
  0.41900000   0.51916644
  0.41900000   0.51916644
  0.41900000   0.51916645
  0.41900000   0.51916646
  0.41900000   0.51916646
  0.41900000   0.51916647
  0.41900000   0.51916647
  0.41900000   0.51916648
  0.41900000   0.51916649
  0.41900000   0.51916649
  0.41900000   0.51916650
  0.41900000   0.51916650
  0.41900000   0.51916651
  0.41900000   0.51916651
  0.41900000   0.51916652
  0.41900000   0.51916653
  0.41900000   0.51916653
  0.41900000   0.51916654
  0.41900000   0.51916654
  0.41900000   0.51916655
  0.41900000   0.51916655
  0.41900000   0.51916656
  0.41900000   0.51916657
  0.41900000   0.51916657
  0.41900000   0.51916658
  0.41900000   0.51916658
  0.41900000   0.51916659
  0.41900000   0.51916659
  0.41900000   0.51916660
  0.41900000   0.51916660
  0.41900000   0.51916661
  0.41900000   0.51916662
  0.41900000   0.51916662
  0.41900000   0.51916663
  0.41900000   0.51916663
  0.41900000   0.51916664
  0.41900000   0.51916664
  0.41900000   0.51916665
  0.41900000   0.51916665
  0.42000000   0.51967966
  0.42000000   0.51967967
  0.42000000   0.51967967
  0.42000000   0.51967968
  0.42000000   0.51967968
  0.42000000   0.51967969
  0.42000000   0.51967970
  0.42000000   0.51967970
  0.42000000   0.51967971
  0.42000000   0.51967971
  0.42000000   0.51967972
  0.42000000   0.51967972
  0.42000000   0.51967973
  0.42000000   0.51967974
  0.42000000   0.51967974
  0.42000000   0.51967975
  0.42000000   0.51967975
  0.42000000   0.51967976
  0.42000000   0.51967977
  0.42000000   0.51967977
  0.42000000   0.51967978
  0.42000000   0.51967978
  0.42000000   0.51967979
  0.42000000   0.51967979
  0.42000000   0.51967980
  0.42000000   0.51967981
  0.42000000   0.51967981
  0.42000000   0.51967982
  0.42000000   0.51967982
  0.42000000   0.51967983
  0.42000000   0.51967983
  0.42000000   0.51967984
  0.42000000   0.51967984
  0.42000000   0.51967985
  0.42000000   0.51967986
  0.42000000   0.51967986
  0.42000000   0.51967987
  0.42000000   0.51967987
  0.42000000   0.51967988
  0.42000000   0.51967988
  0.42100000   0.52019163
  0.42100000   0.52019164
  0.42100000   0.52019165
  0.42100000   0.52019165
  0.42100000   0.52019166
  0.42100000   0.52019166
  0.42100000   0.52019167
  0.42100000   0.52019168
  0.42100000   0.52019168
  0.42100000   0.52019169
  0.42100000   0.52019169
  0.42100000   0.52019170
  0.42100000   0.52019170
  0.42100000   0.52019171
  0.42100000   0.52019172
  0.42100000   0.52019172
  0.42100000   0.52019173
  0.42100000   0.52019173
  0.42100000   0.52019174
  0.42100000   0.52019175
  0.42100000   0.52019175
  0.42100000   0.52019176
  0.42100000   0.52019176
  0.42100000   0.52019177
  0.42100000   0.52019177
  0.42100000   0.52019178
  0.42100000   0.52019179
  0.42100000   0.52019179
  0.42100000   0.52019180
  0.42100000   0.52019180
  0.42100000   0.52019181
  0.42100000   0.52019181
  0.42100000   0.52019182
  0.42100000   0.52019182
  0.42100000   0.52019183
  0.42100000   0.52019184
  0.42100000   0.52019184
  0.42100000   0.52019185
  0.42100000   0.52019185
  0.42100000   0.52019186
  0.42200000   0.52070236
  0.42200000   0.52070237
  0.42200000   0.52070237
  0.42200000   0.52070238
  0.42200000   0.52070238
  0.42200000   0.52070239
  0.42200000   0.52070240
  0.42200000   0.52070240
  0.42200000   0.52070241
  0.42200000   0.52070241
  0.42200000   0.52070242
  0.42200000   0.52070242
  0.42200000   0.52070243
  0.42200000   0.52070244
  0.42200000   0.52070244
  0.42200000   0.52070245
  0.42200000   0.52070245
  0.42200000   0.52070246
  0.42200000   0.52070247
  0.42200000   0.52070247
  0.42200000   0.52070248
  0.42200000   0.52070248
  0.42200000   0.52070249
  0.42200000   0.52070249
  0.42200000   0.52070250
  0.42200000   0.52070251
  0.42200000   0.52070251
  0.42200000   0.52070252
  0.42200000   0.52070252
  0.42200000   0.52070253
  0.42200000   0.52070253
  0.42200000   0.52070254
  0.42200000   0.52070254
  0.42200000   0.52070255
  0.42200000   0.52070256
  0.42200000   0.52070256
  0.42200000   0.52070257
  0.42200000   0.52070257
  0.42200000   0.52070258
  0.42200000   0.52070258
  0.42300000   0.52121184
  0.42300000   0.52121185
  0.42300000   0.52121185
  0.42300000   0.52121186
  0.42300000   0.52121187
  0.42300000   0.52121187
  0.42300000   0.52121188
  0.42300000   0.52121188
  0.42300000   0.52121189
  0.42300000   0.52121190
  0.42300000   0.52121190
  0.42300000   0.52121191
  0.42300000   0.52121191
  0.42300000   0.52121192
  0.42300000   0.52121192
  0.42300000   0.52121193
  0.42300000   0.52121194
  0.42300000   0.52121194
  0.42300000   0.52121195
  0.42300000   0.52121195
  0.42300000   0.52121196
  0.42300000   0.52121197
  0.42300000   0.52121197
  0.42300000   0.52121198
  0.42300000   0.52121198
  0.42300000   0.52121199
  0.42300000   0.52121199
  0.42300000   0.52121200
  0.42300000   0.52121200
  0.42300000   0.52121201
  0.42300000   0.52121202
  0.42300000   0.52121202
  0.42300000   0.52121203
  0.42300000   0.52121203
  0.42300000   0.52121204
  0.42300000   0.52121204
  0.42300000   0.52121205
  0.42300000   0.52121206
  0.42300000   0.52121206
  0.42300000   0.52121207
  0.42400000   0.52172009
  0.42400000   0.52172009
  0.42400000   0.52172010
  0.42400000   0.52172010
  0.42400000   0.52172011
  0.42400000   0.52172012
  0.42400000   0.52172012
  0.42400000   0.52172013
  0.42400000   0.52172013
  0.42400000   0.52172014
  0.42400000   0.52172015
  0.42400000   0.52172015
  0.42400000   0.52172016
  0.42400000   0.52172016
  0.42400000   0.52172017
  0.42400000   0.52172017
  0.42400000   0.52172018
  0.42400000   0.52172019
  0.42400000   0.52172019
  0.42400000   0.52172020
  0.42400000   0.52172020
  0.42400000   0.52172021
  0.42400000   0.52172022
  0.42400000   0.52172022
  0.42400000   0.52172023
  0.42400000   0.52172023
  0.42400000   0.52172024
  0.42400000   0.52172024
  0.42400000   0.52172025
  0.42400000   0.52172026
  0.42400000   0.52172026
  0.42400000   0.52172027
  0.42400000   0.52172027
  0.42400000   0.52172028
  0.42400000   0.52172028
  0.42400000   0.52172029
  0.42400000   0.52172029
  0.42400000   0.52172030
  0.42400000   0.52172031
  0.42400000   0.52172031
  0.42500000   0.52222710
  0.42500000   0.52222710
  0.42500000   0.52222711
  0.42500000   0.52222712
  0.42500000   0.52222712
  0.42500000   0.52222713
  0.42500000   0.52222713
  0.42500000   0.52222714
  0.42500000   0.52222715
  0.42500000   0.52222715
  0.42500000   0.52222716
  0.42500000   0.52222716
  0.42500000   0.52222717
  0.42500000   0.52222717
  0.42500000   0.52222718
  0.42500000   0.52222719
  0.42500000   0.52222719
  0.42500000   0.52222720
  0.42500000   0.52222720
  0.42500000   0.52222721
  0.42500000   0.52222722
  0.42500000   0.52222722
  0.42500000   0.52222723
  0.42500000   0.52222723
  0.42500000   0.52222724
  0.42500000   0.52222724
  0.42500000   0.52222725
  0.42500000   0.52222726
  0.42500000   0.52222726
  0.42500000   0.52222727
  0.42500000   0.52222727
  0.42500000   0.52222728
  0.42500000   0.52222728
  0.42500000   0.52222729
  0.42500000   0.52222730
  0.42500000   0.52222730
  0.42500000   0.52222731
  0.42500000   0.52222731
  0.42500000   0.52222732
  0.42500000   0.52222732
  0.42600000   0.52273288
  0.42600000   0.52273289
  0.42600000   0.52273289
  0.42600000   0.52273290
  0.42600000   0.52273291
  0.42600000   0.52273291
  0.42600000   0.52273292
  0.42600000   0.52273292
  0.42600000   0.52273293
  0.42600000   0.52273294
  0.42600000   0.52273294
  0.42600000   0.52273295
  0.42600000   0.52273295
  0.42600000   0.52273296
  0.42600000   0.52273296
  0.42600000   0.52273297
  0.42600000   0.52273298
  0.42600000   0.52273298
  0.42600000   0.52273299
  0.42600000   0.52273299
  0.42600000   0.52273300
  0.42600000   0.52273301
  0.42600000   0.52273301
  0.42600000   0.52273302
  0.42600000   0.52273302
  0.42600000   0.52273303
  0.42600000   0.52273303
  0.42600000   0.52273304
  0.42600000   0.52273305
  0.42600000   0.52273305
  0.42600000   0.52273306
  0.42600000   0.52273306
  0.42600000   0.52273307
  0.42600000   0.52273307
  0.42600000   0.52273308
  0.42600000   0.52273309
  0.42600000   0.52273309
  0.42600000   0.52273310
  0.42600000   0.52273310
  0.42600000   0.52273311
  0.42700000   0.52323744
  0.42700000   0.52323745
  0.42700000   0.52323746
  0.42700000   0.52323746
  0.42700000   0.52323747
  0.42700000   0.52323747
  0.42700000   0.52323748
  0.42700000   0.52323749
  0.42700000   0.52323749
  0.42700000   0.52323750
  0.42700000   0.52323750
  0.42700000   0.52323751
  0.42700000   0.52323751
  0.42700000   0.52323752
  0.42700000   0.52323753
  0.42700000   0.52323753
  0.42700000   0.52323754
  0.42700000   0.52323754
  0.42700000   0.52323755
  0.42700000   0.52323756
  0.42700000   0.52323756
  0.42700000   0.52323757
  0.42700000   0.52323757
  0.42700000   0.52323758
  0.42700000   0.52323758
  0.42700000   0.52323759
  0.42700000   0.52323760
  0.42700000   0.52323760
  0.42700000   0.52323761
  0.42700000   0.52323761
  0.42700000   0.52323762
  0.42700000   0.52323762
  0.42700000   0.52323763
  0.42700000   0.52323764
  0.42700000   0.52323764
  0.42700000   0.52323765
  0.42700000   0.52323765
  0.42700000   0.52323766
  0.42700000   0.52323766
  0.42700000   0.52323767
  0.42800000   0.52374079
  0.42800000   0.52374079
  0.42800000   0.52374080
  0.42800000   0.52374081
  0.42800000   0.52374081
  0.42800000   0.52374082
  0.42800000   0.52374082
  0.42800000   0.52374083
  0.42800000   0.52374084
  0.42800000   0.52374084
  0.42800000   0.52374085
  0.42800000   0.52374085
  0.42800000   0.52374086
  0.42800000   0.52374087
  0.42800000   0.52374087
  0.42800000   0.52374088
  0.42800000   0.52374088
  0.42800000   0.52374089
  0.42800000   0.52374089
  0.42800000   0.52374090
  0.42800000   0.52374091
  0.42800000   0.52374091
  0.42800000   0.52374092
  0.42800000   0.52374092
  0.42800000   0.52374093
  0.42800000   0.52374093
  0.42800000   0.52374094
  0.42800000   0.52374095
  0.42800000   0.52374095
  0.42800000   0.52374096
  0.42800000   0.52374096
  0.42800000   0.52374097
  0.42800000   0.52374097
  0.42800000   0.52374098
  0.42800000   0.52374099
  0.42800000   0.52374099
  0.42800000   0.52374100
  0.42800000   0.52374100
  0.42800000   0.52374101
  0.42800000   0.52374101
  0.42900000   0.52424292
  0.42900000   0.52424293
  0.42900000   0.52424293
  0.42900000   0.52424294
  0.42900000   0.52424294
  0.42900000   0.52424295
  0.42900000   0.52424296
  0.42900000   0.52424296
  0.42900000   0.52424297
  0.42900000   0.52424297
  0.42900000   0.52424298
  0.42900000   0.52424299
  0.42900000   0.52424299
  0.42900000   0.52424300
  0.42900000   0.52424300
  0.42900000   0.52424301
  0.42900000   0.52424302
  0.42900000   0.52424302
  0.42900000   0.52424303
  0.42900000   0.52424303
  0.42900000   0.52424304
  0.42900000   0.52424304
  0.42900000   0.52424305
  0.42900000   0.52424306
  0.42900000   0.52424306
  0.42900000   0.52424307
  0.42900000   0.52424307
  0.42900000   0.52424308
  0.42900000   0.52424308
  0.42900000   0.52424309
  0.42900000   0.52424310
  0.42900000   0.52424310
  0.42900000   0.52424311
  0.42900000   0.52424311
  0.42900000   0.52424312
  0.42900000   0.52424312
  0.42900000   0.52424313
  0.42900000   0.52424314
  0.42900000   0.52424314
  0.42900000   0.52424315
  0.43000000   0.52474384
  0.43000000   0.52474385
  0.43000000   0.52474386
  0.43000000   0.52474386
  0.43000000   0.52474387
  0.43000000   0.52474388
  0.43000000   0.52474388
  0.43000000   0.52474389
  0.43000000   0.52474389
  0.43000000   0.52474390
  0.43000000   0.52474390
  0.43000000   0.52474391
  0.43000000   0.52474392
  0.43000000   0.52474392
  0.43000000   0.52474393
  0.43000000   0.52474393
  0.43000000   0.52474394
  0.43000000   0.52474395
  0.43000000   0.52474395
  0.43000000   0.52474396
  0.43000000   0.52474396
  0.43000000   0.52474397
  0.43000000   0.52474398
  0.43000000   0.52474398
  0.43000000   0.52474399
  0.43000000   0.52474399
  0.43000000   0.52474400
  0.43000000   0.52474400
  0.43000000   0.52474401
  0.43000000   0.52474402
  0.43000000   0.52474402
  0.43000000   0.52474403
  0.43000000   0.52474403
  0.43000000   0.52474404
  0.43000000   0.52474404
  0.43000000   0.52474405
  0.43000000   0.52474406
  0.43000000   0.52474406
  0.43000000   0.52474407
  0.43000000   0.52474407
  0.43100000   0.52524357
  0.43100000   0.52524357
  0.43100000   0.52524358
  0.43100000   0.52524359
  0.43100000   0.52524359
  0.43100000   0.52524360
  0.43100000   0.52524360
  0.43100000   0.52524361
  0.43100000   0.52524362
  0.43100000   0.52524362
  0.43100000   0.52524363
  0.43100000   0.52524363
  0.43100000   0.52524364
  0.43100000   0.52524365
  0.43100000   0.52524365
  0.43100000   0.52524366
  0.43100000   0.52524366
  0.43100000   0.52524367
  0.43100000   0.52524368
  0.43100000   0.52524368
  0.43100000   0.52524369
  0.43100000   0.52524369
  0.43100000   0.52524370
  0.43100000   0.52524370
  0.43100000   0.52524371
  0.43100000   0.52524372
  0.43100000   0.52524372
  0.43100000   0.52524373
  0.43100000   0.52524373
  0.43100000   0.52524374
  0.43100000   0.52524374
  0.43100000   0.52524375
  0.43100000   0.52524376
  0.43100000   0.52524376
  0.43100000   0.52524377
  0.43100000   0.52524377
  0.43100000   0.52524378
  0.43100000   0.52524378
  0.43100000   0.52524379
  0.43100000   0.52524380
  0.43200000   0.52574209
  0.43200000   0.52574210
  0.43200000   0.52574211
  0.43200000   0.52574211
  0.43200000   0.52574212
  0.43200000   0.52574212
  0.43200000   0.52574213
  0.43200000   0.52574214
  0.43200000   0.52574214
  0.43200000   0.52574215
  0.43200000   0.52574215
  0.43200000   0.52574216
  0.43200000   0.52574217
  0.43200000   0.52574217
  0.43200000   0.52574218
  0.43200000   0.52574218
  0.43200000   0.52574219
  0.43200000   0.52574220
  0.43200000   0.52574220
  0.43200000   0.52574221
  0.43200000   0.52574221
  0.43200000   0.52574222
  0.43200000   0.52574222
  0.43200000   0.52574223
  0.43200000   0.52574224
  0.43200000   0.52574224
  0.43200000   0.52574225
  0.43200000   0.52574225
  0.43200000   0.52574226
  0.43200000   0.52574226
  0.43200000   0.52574227
  0.43200000   0.52574228
  0.43200000   0.52574228
  0.43200000   0.52574229
  0.43200000   0.52574229
  0.43200000   0.52574230
  0.43200000   0.52574230
  0.43200000   0.52574231
  0.43200000   0.52574232
  0.43200000   0.52574232
  0.43300000   0.52623943
  0.43300000   0.52623943
  0.43300000   0.52623944
  0.43300000   0.52623945
  0.43300000   0.52623945
  0.43300000   0.52623946
  0.43300000   0.52623946
  0.43300000   0.52623947
  0.43300000   0.52623948
  0.43300000   0.52623948
  0.43300000   0.52623949
  0.43300000   0.52623949
  0.43300000   0.52623950
  0.43300000   0.52623951
  0.43300000   0.52623951
  0.43300000   0.52623952
  0.43300000   0.52623952
  0.43300000   0.52623953
  0.43300000   0.52623953
  0.43300000   0.52623954
  0.43300000   0.52623955
  0.43300000   0.52623955
  0.43300000   0.52623956
  0.43300000   0.52623956
  0.43300000   0.52623957
  0.43300000   0.52623958
  0.43300000   0.52623958
  0.43300000   0.52623959
  0.43300000   0.52623959
  0.43300000   0.52623960
  0.43300000   0.52623960
  0.43300000   0.52623961
  0.43300000   0.52623962
  0.43300000   0.52623962
  0.43300000   0.52623963
  0.43300000   0.52623963
  0.43300000   0.52623964
  0.43300000   0.52623964
  0.43300000   0.52623965
  0.43300000   0.52623966
  0.43400000   0.52673557
  0.43400000   0.52673558
  0.43400000   0.52673559
  0.43400000   0.52673559
  0.43400000   0.52673560
  0.43400000   0.52673560
  0.43400000   0.52673561
  0.43400000   0.52673562
  0.43400000   0.52673562
  0.43400000   0.52673563
  0.43400000   0.52673563
  0.43400000   0.52673564
  0.43400000   0.52673565
  0.43400000   0.52673565
  0.43400000   0.52673566
  0.43400000   0.52673566
  0.43400000   0.52673567
  0.43400000   0.52673568
  0.43400000   0.52673568
  0.43400000   0.52673569
  0.43400000   0.52673569
  0.43400000   0.52673570
  0.43400000   0.52673570
  0.43400000   0.52673571
  0.43400000   0.52673572
  0.43400000   0.52673572
  0.43400000   0.52673573
  0.43400000   0.52673573
  0.43400000   0.52673574
  0.43400000   0.52673575
  0.43400000   0.52673575
  0.43400000   0.52673576
  0.43400000   0.52673576
  0.43400000   0.52673577
  0.43400000   0.52673577
  0.43400000   0.52673578
  0.43400000   0.52673579
  0.43400000   0.52673579
  0.43400000   0.52673580
  0.43400000   0.52673580
  0.43500000   0.52723054
  0.43500000   0.52723054
  0.43500000   0.52723055
  0.43500000   0.52723056
  0.43500000   0.52723056
  0.43500000   0.52723057
  0.43500000   0.52723057
  0.43500000   0.52723058
  0.43500000   0.52723059
  0.43500000   0.52723059
  0.43500000   0.52723060
  0.43500000   0.52723060
  0.43500000   0.52723061
  0.43500000   0.52723062
  0.43500000   0.52723062
  0.43500000   0.52723063
  0.43500000   0.52723063
  0.43500000   0.52723064
  0.43500000   0.52723065
  0.43500000   0.52723065
  0.43500000   0.52723066
  0.43500000   0.52723066
  0.43500000   0.52723067
  0.43500000   0.52723068
  0.43500000   0.52723068
  0.43500000   0.52723069
  0.43500000   0.52723069
  0.43500000   0.52723070
  0.43500000   0.52723070
  0.43500000   0.52723071
  0.43500000   0.52723072
  0.43500000   0.52723072
  0.43500000   0.52723073
  0.43500000   0.52723073
  0.43500000   0.52723074
  0.43500000   0.52723074
  0.43500000   0.52723075
  0.43500000   0.52723076
  0.43500000   0.52723076
  0.43500000   0.52723077
  0.43600000   0.52772432
  0.43600000   0.52772433
  0.43600000   0.52772434
  0.43600000   0.52772434
  0.43600000   0.52772435
  0.43600000   0.52772436
  0.43600000   0.52772436
  0.43600000   0.52772437
  0.43600000   0.52772437
  0.43600000   0.52772438
  0.43600000   0.52772439
  0.43600000   0.52772439
  0.43600000   0.52772440
  0.43600000   0.52772440
  0.43600000   0.52772441
  0.43600000   0.52772442
  0.43600000   0.52772442
  0.43600000   0.52772443
  0.43600000   0.52772443
  0.43600000   0.52772444
  0.43600000   0.52772444
  0.43600000   0.52772445
  0.43600000   0.52772446
  0.43600000   0.52772446
  0.43600000   0.52772447
  0.43600000   0.52772447
  0.43600000   0.52772448
  0.43600000   0.52772449
  0.43600000   0.52772449
  0.43600000   0.52772450
  0.43600000   0.52772450
  0.43600000   0.52772451
  0.43600000   0.52772451
  0.43600000   0.52772452
  0.43600000   0.52772453
  0.43600000   0.52772453
  0.43600000   0.52772454
  0.43600000   0.52772454
  0.43600000   0.52772455
  0.43600000   0.52772455
  0.43700000   0.52821694
  0.43700000   0.52821695
  0.43700000   0.52821695
  0.43700000   0.52821696
  0.43700000   0.52821696
  0.43700000   0.52821697
  0.43700000   0.52821698
  0.43700000   0.52821698
  0.43700000   0.52821699
  0.43700000   0.52821699
  0.43700000   0.52821700
  0.43700000   0.52821701
  0.43700000   0.52821701
  0.43700000   0.52821702
  0.43700000   0.52821702
  0.43700000   0.52821703
  0.43700000   0.52821704
  0.43700000   0.52821704
  0.43700000   0.52821705
  0.43700000   0.52821705
  0.43700000   0.52821706
  0.43700000   0.52821706
  0.43700000   0.52821707
  0.43700000   0.52821708
  0.43700000   0.52821708
  0.43700000   0.52821709
  0.43700000   0.52821709
  0.43700000   0.52821710
  0.43700000   0.52821711
  0.43700000   0.52821711
  0.43700000   0.52821712
  0.43700000   0.52821712
  0.43700000   0.52821713
  0.43700000   0.52821713
  0.43700000   0.52821714
  0.43700000   0.52821715
  0.43700000   0.52821715
  0.43700000   0.52821716
  0.43700000   0.52821716
  0.43700000   0.52821717
  0.43800000   0.52870839
  0.43800000   0.52870839
  0.43800000   0.52870840
  0.43800000   0.52870840
  0.43800000   0.52870841
  0.43800000   0.52870842
  0.43800000   0.52870842
  0.43800000   0.52870843
  0.43800000   0.52870843
  0.43800000   0.52870844
  0.43800000   0.52870845
  0.43800000   0.52870845
  0.43800000   0.52870846
  0.43800000   0.52870846
  0.43800000   0.52870847
  0.43800000   0.52870848
  0.43800000   0.52870848
  0.43800000   0.52870849
  0.43800000   0.52870849
  0.43800000   0.52870850
  0.43800000   0.52870851
  0.43800000   0.52870851
  0.43800000   0.52870852
  0.43800000   0.52870852
  0.43800000   0.52870853
  0.43800000   0.52870854
  0.43800000   0.52870854
  0.43800000   0.52870855
  0.43800000   0.52870855
  0.43800000   0.52870856
  0.43800000   0.52870856
  0.43800000   0.52870857
  0.43800000   0.52870858
  0.43800000   0.52870858
  0.43800000   0.52870859
  0.43800000   0.52870859
  0.43800000   0.52870860
  0.43800000   0.52870860
  0.43800000   0.52870861
  0.43800000   0.52870862
  0.43900000   0.52919867
  0.43900000   0.52919868
  0.43900000   0.52919868
  0.43900000   0.52919869
  0.43900000   0.52919869
  0.43900000   0.52919870
  0.43900000   0.52919871
  0.43900000   0.52919871
  0.43900000   0.52919872
  0.43900000   0.52919872
  0.43900000   0.52919873
  0.43900000   0.52919874
  0.43900000   0.52919874
  0.43900000   0.52919875
  0.43900000   0.52919875
  0.43900000   0.52919876
  0.43900000   0.52919877
  0.43900000   0.52919877
  0.43900000   0.52919878
  0.43900000   0.52919878
  0.43900000   0.52919879
  0.43900000   0.52919880
  0.43900000   0.52919880
  0.43900000   0.52919881
  0.43900000   0.52919881
  0.43900000   0.52919882
  0.43900000   0.52919882
  0.43900000   0.52919883
  0.43900000   0.52919884
  0.43900000   0.52919884
  0.43900000   0.52919885
  0.43900000   0.52919885
  0.43900000   0.52919886
  0.43900000   0.52919887
  0.43900000   0.52919887
  0.43900000   0.52919888
  0.43900000   0.52919888
  0.43900000   0.52919889
  0.43900000   0.52919889
  0.43900000   0.52919890
  0.44000000   0.52968779
  0.44000000   0.52968780
  0.44000000   0.52968781
  0.44000000   0.52968781
  0.44000000   0.52968782
  0.44000000   0.52968782
  0.44000000   0.52968783
  0.44000000   0.52968784
  0.44000000   0.52968784
  0.44000000   0.52968785
  0.44000000   0.52968786
  0.44000000   0.52968786
  0.44000000   0.52968787
  0.44000000   0.52968787
  0.44000000   0.52968788
  0.44000000   0.52968789
  0.44000000   0.52968789
  0.44000000   0.52968790
  0.44000000   0.52968790
  0.44000000   0.52968791
  0.44000000   0.52968791
  0.44000000   0.52968792
  0.44000000   0.52968793
  0.44000000   0.52968793
  0.44000000   0.52968794
  0.44000000   0.52968794
  0.44000000   0.52968795
  0.44000000   0.52968796
  0.44000000   0.52968796
  0.44000000   0.52968797
  0.44000000   0.52968797
  0.44000000   0.52968798
  0.44000000   0.52968799
  0.44000000   0.52968799
  0.44000000   0.52968800
  0.44000000   0.52968800
  0.44000000   0.52968801
  0.44000000   0.52968801
  0.44000000   0.52968802
  0.44000000   0.52968803
  0.44100000   0.53017577
  0.44100000   0.53017577
  0.44100000   0.53017578
  0.44100000   0.53017578
  0.44100000   0.53017579
  0.44100000   0.53017580
  0.44100000   0.53017580
  0.44100000   0.53017581
  0.44100000   0.53017581
  0.44100000   0.53017582
  0.44100000   0.53017583
  0.44100000   0.53017583
  0.44100000   0.53017584
  0.44100000   0.53017585
  0.44100000   0.53017585
  0.44100000   0.53017586
  0.44100000   0.53017586
  0.44100000   0.53017587
  0.44100000   0.53017587
  0.44100000   0.53017588
  0.44100000   0.53017589
  0.44100000   0.53017589
  0.44100000   0.53017590
  0.44100000   0.53017590
  0.44100000   0.53017591
  0.44100000   0.53017592
  0.44100000   0.53017592
  0.44100000   0.53017593
  0.44100000   0.53017593
  0.44100000   0.53017594
  0.44100000   0.53017595
  0.44100000   0.53017595
  0.44100000   0.53017596
  0.44100000   0.53017596
  0.44100000   0.53017597
  0.44100000   0.53017597
  0.44100000   0.53017598
  0.44100000   0.53017599
  0.44100000   0.53017599
  0.44100000   0.53017600
  0.44200000   0.53066259
  0.44200000   0.53066260
  0.44200000   0.53066260
  0.44200000   0.53066261
  0.44200000   0.53066261
  0.44200000   0.53066262
  0.44200000   0.53066263
  0.44200000   0.53066263
  0.44200000   0.53066264
  0.44200000   0.53066264
  0.44200000   0.53066265
  0.44200000   0.53066266
  0.44200000   0.53066266
  0.44200000   0.53066267
  0.44200000   0.53066267
  0.44200000   0.53066268
  0.44200000   0.53066269
  0.44200000   0.53066269
  0.44200000   0.53066270
  0.44200000   0.53066270
  0.44200000   0.53066271
  0.44200000   0.53066272
  0.44200000   0.53066272
  0.44200000   0.53066273
  0.44200000   0.53066273
  0.44200000   0.53066274
  0.44200000   0.53066275
  0.44200000   0.53066275
  0.44200000   0.53066276
  0.44200000   0.53066276
  0.44200000   0.53066277
  0.44200000   0.53066277
  0.44200000   0.53066278
  0.44200000   0.53066279
  0.44200000   0.53066279
  0.44200000   0.53066280
  0.44200000   0.53066280
  0.44200000   0.53066281
  0.44200000   0.53066281
  0.44200000   0.53066282
  0.44300000   0.53114827
  0.44300000   0.53114827
  0.44300000   0.53114828
  0.44300000   0.53114829
  0.44300000   0.53114829
  0.44300000   0.53114830
  0.44300000   0.53114830
  0.44300000   0.53114831
  0.44300000   0.53114832
  0.44300000   0.53114832
  0.44300000   0.53114833
  0.44300000   0.53114834
  0.44300000   0.53114834
  0.44300000   0.53114835
  0.44300000   0.53114835
  0.44300000   0.53114836
  0.44300000   0.53114837
  0.44300000   0.53114837
  0.44300000   0.53114838
  0.44300000   0.53114838
  0.44300000   0.53114839
  0.44300000   0.53114839
  0.44300000   0.53114840
  0.44300000   0.53114841
  0.44300000   0.53114841
  0.44300000   0.53114842
  0.44300000   0.53114842
  0.44300000   0.53114843
  0.44300000   0.53114844
  0.44300000   0.53114844
  0.44300000   0.53114845
  0.44300000   0.53114845
  0.44300000   0.53114846
  0.44300000   0.53114847
  0.44300000   0.53114847
  0.44300000   0.53114848
  0.44300000   0.53114848
  0.44300000   0.53114849
  0.44300000   0.53114849
  0.44300000   0.53114850
  0.44400000   0.53163281
  0.44400000   0.53163281
  0.44400000   0.53163282
  0.44400000   0.53163283
  0.44400000   0.53163283
  0.44400000   0.53163284
  0.44400000   0.53163284
  0.44400000   0.53163285
  0.44400000   0.53163286
  0.44400000   0.53163286
  0.44400000   0.53163287
  0.44400000   0.53163287
  0.44400000   0.53163288
  0.44400000   0.53163289
  0.44400000   0.53163289
  0.44400000   0.53163290
  0.44400000   0.53163290
  0.44400000   0.53163291
  0.44400000   0.53163292
  0.44400000   0.53163292
  0.44400000   0.53163293
  0.44400000   0.53163293
  0.44400000   0.53163294
  0.44400000   0.53163295
  0.44400000   0.53163295
  0.44400000   0.53163296
  0.44400000   0.53163296
  0.44400000   0.53163297
  0.44400000   0.53163298
  0.44400000   0.53163298
  0.44400000   0.53163299
  0.44400000   0.53163299
  0.44400000   0.53163300
  0.44400000   0.53163300
  0.44400000   0.53163301
  0.44400000   0.53163302
  0.44400000   0.53163302
  0.44400000   0.53163303
  0.44400000   0.53163303
  0.44400000   0.53163304
  0.44500000   0.53211621
  0.44500000   0.53211622
  0.44500000   0.53211622
  0.44500000   0.53211623
  0.44500000   0.53211624
  0.44500000   0.53211624
  0.44500000   0.53211625
  0.44500000   0.53211625
  0.44500000   0.53211626
  0.44500000   0.53211627
  0.44500000   0.53211627
  0.44500000   0.53211628
  0.44500000   0.53211629
  0.44500000   0.53211629
  0.44500000   0.53211630
  0.44500000   0.53211630
  0.44500000   0.53211631
  0.44500000   0.53211632
  0.44500000   0.53211632
  0.44500000   0.53211633
  0.44500000   0.53211633
  0.44500000   0.53211634
  0.44500000   0.53211635
  0.44500000   0.53211635
  0.44500000   0.53211636
  0.44500000   0.53211636
  0.44500000   0.53211637
  0.44500000   0.53211637
  0.44500000   0.53211638
  0.44500000   0.53211639
  0.44500000   0.53211639
  0.44500000   0.53211640
  0.44500000   0.53211640
  0.44500000   0.53211641
  0.44500000   0.53211642
  0.44500000   0.53211642
  0.44500000   0.53211643
  0.44500000   0.53211643
  0.44500000   0.53211644
  0.44500000   0.53211644
  0.44600000   0.53259849
  0.44600000   0.53259849
  0.44600000   0.53259850
  0.44600000   0.53259850
  0.44600000   0.53259851
  0.44600000   0.53259852
  0.44600000   0.53259852
  0.44600000   0.53259853
  0.44600000   0.53259853
  0.44600000   0.53259854
  0.44600000   0.53259855
  0.44600000   0.53259855
  0.44600000   0.53259856
  0.44600000   0.53259857
  0.44600000   0.53259857
  0.44600000   0.53259858
  0.44600000   0.53259858
  0.44600000   0.53259859
  0.44600000   0.53259860
  0.44600000   0.53259860
  0.44600000   0.53259861
  0.44600000   0.53259861
  0.44600000   0.53259862
  0.44600000   0.53259863
  0.44600000   0.53259863
  0.44600000   0.53259864
  0.44600000   0.53259864
  0.44600000   0.53259865
  0.44600000   0.53259865
  0.44600000   0.53259866
  0.44600000   0.53259867
  0.44600000   0.53259867
  0.44600000   0.53259868
  0.44600000   0.53259868
  0.44600000   0.53259869
  0.44600000   0.53259870
  0.44600000   0.53259870
  0.44600000   0.53259871
  0.44600000   0.53259871
  0.44600000   0.53259872
  0.44700000   0.53307963
  0.44700000   0.53307964
  0.44700000   0.53307965
  0.44700000   0.53307965
  0.44700000   0.53307966
  0.44700000   0.53307966
  0.44700000   0.53307967
  0.44700000   0.53307968
  0.44700000   0.53307968
  0.44700000   0.53307969
  0.44700000   0.53307970
  0.44700000   0.53307970
  0.44700000   0.53307971
  0.44700000   0.53307971
  0.44700000   0.53307972
  0.44700000   0.53307973
  0.44700000   0.53307973
  0.44700000   0.53307974
  0.44700000   0.53307974
  0.44700000   0.53307975
  0.44700000   0.53307976
  0.44700000   0.53307976
  0.44700000   0.53307977
  0.44700000   0.53307977
  0.44700000   0.53307978
  0.44700000   0.53307979
  0.44700000   0.53307979
  0.44700000   0.53307980
  0.44700000   0.53307980
  0.44700000   0.53307981
  0.44700000   0.53307982
  0.44700000   0.53307982
  0.44700000   0.53307983
  0.44700000   0.53307983
  0.44700000   0.53307984
  0.44700000   0.53307984
  0.44700000   0.53307985
  0.44700000   0.53307986
  0.44700000   0.53307986
  0.44700000   0.53307987
  0.44800000   0.53355966
  0.44800000   0.53355967
  0.44800000   0.53355967
  0.44800000   0.53355968
  0.44800000   0.53355969
  0.44800000   0.53355969
  0.44800000   0.53355970
  0.44800000   0.53355970
  0.44800000   0.53355971
  0.44800000   0.53355972
  0.44800000   0.53355972
  0.44800000   0.53355973
  0.44800000   0.53355973
  0.44800000   0.53355974
  0.44800000   0.53355975
  0.44800000   0.53355975
  0.44800000   0.53355976
  0.44800000   0.53355977
  0.44800000   0.53355977
  0.44800000   0.53355978
  0.44800000   0.53355978
  0.44800000   0.53355979
  0.44800000   0.53355980
  0.44800000   0.53355980
  0.44800000   0.53355981
  0.44800000   0.53355981
  0.44800000   0.53355982
  0.44800000   0.53355982
  0.44800000   0.53355983
  0.44800000   0.53355984
  0.44800000   0.53355984
  0.44800000   0.53355985
  0.44800000   0.53355985
  0.44800000   0.53355986
  0.44800000   0.53355987
  0.44800000   0.53355987
  0.44800000   0.53355988
  0.44800000   0.53355988
  0.44800000   0.53355989
  0.44800000   0.53355989
  0.44900000   0.53403857
  0.44900000   0.53403858
  0.44900000   0.53403858
  0.44900000   0.53403859
  0.44900000   0.53403860
  0.44900000   0.53403860
  0.44900000   0.53403861
  0.44900000   0.53403861
  0.44900000   0.53403862
  0.44900000   0.53403863
  0.44900000   0.53403863
  0.44900000   0.53403864
  0.44900000   0.53403865
  0.44900000   0.53403865
  0.44900000   0.53403866
  0.44900000   0.53403866
  0.44900000   0.53403867
  0.44900000   0.53403868
  0.44900000   0.53403868
  0.44900000   0.53403869
  0.44900000   0.53403869
  0.44900000   0.53403870
  0.44900000   0.53403871
  0.44900000   0.53403871
  0.44900000   0.53403872
  0.44900000   0.53403872
  0.44900000   0.53403873
  0.44900000   0.53403874
  0.44900000   0.53403874
  0.44900000   0.53403875
  0.44900000   0.53403875
  0.44900000   0.53403876
  0.44900000   0.53403876
  0.44900000   0.53403877
  0.44900000   0.53403878
  0.44900000   0.53403878
  0.44900000   0.53403879
  0.44900000   0.53403879
  0.44900000   0.53403880
  0.44900000   0.53403881
  0.45000000   0.53451637
  0.45000000   0.53451638
  0.45000000   0.53451638
  0.45000000   0.53451639
  0.45000000   0.53451639
  0.45000000   0.53451640
  0.45000000   0.53451641
  0.45000000   0.53451641
  0.45000000   0.53451642
  0.45000000   0.53451643
  0.45000000   0.53451643
  0.45000000   0.53451644
  0.45000000   0.53451644
  0.45000000   0.53451645
  0.45000000   0.53451646
  0.45000000   0.53451646
  0.45000000   0.53451647
  0.45000000   0.53451647
  0.45000000   0.53451648
  0.45000000   0.53451649
  0.45000000   0.53451649
  0.45000000   0.53451650
  0.45000000   0.53451650
  0.45000000   0.53451651
  0.45000000   0.53451652
  0.45000000   0.53451652
  0.45000000   0.53451653
  0.45000000   0.53451653
  0.45000000   0.53451654
  0.45000000   0.53451655
  0.45000000   0.53451655
  0.45000000   0.53451656
  0.45000000   0.53451656
  0.45000000   0.53451657
  0.45000000   0.53451657
  0.45000000   0.53451658
  0.45000000   0.53451659
  0.45000000   0.53451659
  0.45000000   0.53451660
  0.45000000   0.53451660
  0.45100000   0.53499306
  0.45100000   0.53499307
  0.45100000   0.53499307
  0.45100000   0.53499308
  0.45100000   0.53499308
  0.45100000   0.53499309
  0.45100000   0.53499310
  0.45100000   0.53499310
  0.45100000   0.53499311
  0.45100000   0.53499312
  0.45100000   0.53499312
  0.45100000   0.53499313
  0.45100000   0.53499313
  0.45100000   0.53499314
  0.45100000   0.53499315
  0.45100000   0.53499315
  0.45100000   0.53499316
  0.45100000   0.53499316
  0.45100000   0.53499317
  0.45100000   0.53499318
  0.45100000   0.53499318
  0.45100000   0.53499319
  0.45100000   0.53499319
  0.45100000   0.53499320
  0.45100000   0.53499321
  0.45100000   0.53499321
  0.45100000   0.53499322
  0.45100000   0.53499322
  0.45100000   0.53499323
  0.45100000   0.53499324
  0.45100000   0.53499324
  0.45100000   0.53499325
  0.45100000   0.53499325
  0.45100000   0.53499326
  0.45100000   0.53499327
  0.45100000   0.53499327
  0.45100000   0.53499328
  0.45100000   0.53499328
  0.45100000   0.53499329
  0.45100000   0.53499329
  0.45200000   0.53546865
  0.45200000   0.53546865
  0.45200000   0.53546866
  0.45200000   0.53546867
  0.45200000   0.53546867
  0.45200000   0.53546868
  0.45200000   0.53546868
  0.45200000   0.53546869
  0.45200000   0.53546870
  0.45200000   0.53546870
  0.45200000   0.53546871
  0.45200000   0.53546871
  0.45200000   0.53546872
  0.45200000   0.53546873
  0.45200000   0.53546873
  0.45200000   0.53546874
  0.45200000   0.53546875
  0.45200000   0.53546875
  0.45200000   0.53546876
  0.45200000   0.53546876
  0.45200000   0.53546877
  0.45200000   0.53546878
  0.45200000   0.53546878
  0.45200000   0.53546879
  0.45200000   0.53546879
  0.45200000   0.53546880
  0.45200000   0.53546881
  0.45200000   0.53546881
  0.45200000   0.53546882
  0.45200000   0.53546882
  0.45200000   0.53546883
  0.45200000   0.53546883
  0.45200000   0.53546884
  0.45200000   0.53546885
  0.45200000   0.53546885
  0.45200000   0.53546886
  0.45200000   0.53546886
  0.45200000   0.53546887
  0.45200000   0.53546888
  0.45200000   0.53546888
  0.45300000   0.53594313
  0.45300000   0.53594314
  0.45300000   0.53594315
  0.45300000   0.53594315
  0.45300000   0.53594316
  0.45300000   0.53594317
  0.45300000   0.53594317
  0.45300000   0.53594318
  0.45300000   0.53594318
  0.45300000   0.53594319
  0.45300000   0.53594320
  0.45300000   0.53594320
  0.45300000   0.53594321
  0.45300000   0.53594321
  0.45300000   0.53594322
  0.45300000   0.53594323
  0.45300000   0.53594323
  0.45300000   0.53594324
  0.45300000   0.53594325
  0.45300000   0.53594325
  0.45300000   0.53594326
  0.45300000   0.53594326
  0.45300000   0.53594327
  0.45300000   0.53594328
  0.45300000   0.53594328
  0.45300000   0.53594329
  0.45300000   0.53594329
  0.45300000   0.53594330
  0.45300000   0.53594331
  0.45300000   0.53594331
  0.45300000   0.53594332
  0.45300000   0.53594332
  0.45300000   0.53594333
  0.45300000   0.53594333
  0.45300000   0.53594334
  0.45300000   0.53594335
  0.45300000   0.53594335
  0.45300000   0.53594336
  0.45300000   0.53594336
  0.45300000   0.53594337
  0.45400000   0.53641653
  0.45400000   0.53641653
  0.45400000   0.53641654
  0.45400000   0.53641655
  0.45400000   0.53641655
  0.45400000   0.53641656
  0.45400000   0.53641656
  0.45400000   0.53641657
  0.45400000   0.53641658
  0.45400000   0.53641658
  0.45400000   0.53641659
  0.45400000   0.53641660
  0.45400000   0.53641660
  0.45400000   0.53641661
  0.45400000   0.53641661
  0.45400000   0.53641662
  0.45400000   0.53641663
  0.45400000   0.53641663
  0.45400000   0.53641664
  0.45400000   0.53641664
  0.45400000   0.53641665
  0.45400000   0.53641666
  0.45400000   0.53641666
  0.45400000   0.53641667
  0.45400000   0.53641667
  0.45400000   0.53641668
  0.45400000   0.53641669
  0.45400000   0.53641669
  0.45400000   0.53641670
  0.45400000   0.53641670
  0.45400000   0.53641671
  0.45400000   0.53641672
  0.45400000   0.53641672
  0.45400000   0.53641673
  0.45400000   0.53641673
  0.45400000   0.53641674
  0.45400000   0.53641675
  0.45400000   0.53641675
  0.45400000   0.53641676
  0.45400000   0.53641676
  0.45500000   0.53688883
  0.45500000   0.53688884
  0.45500000   0.53688884
  0.45500000   0.53688885
  0.45500000   0.53688886
  0.45500000   0.53688886
  0.45500000   0.53688887
  0.45500000   0.53688887
  0.45500000   0.53688888
  0.45500000   0.53688889
  0.45500000   0.53688889
  0.45500000   0.53688890
  0.45500000   0.53688890
  0.45500000   0.53688891
  0.45500000   0.53688892
  0.45500000   0.53688892
  0.45500000   0.53688893
  0.45500000   0.53688894
  0.45500000   0.53688894
  0.45500000   0.53688895
  0.45500000   0.53688895
  0.45500000   0.53688896
  0.45500000   0.53688897
  0.45500000   0.53688897
  0.45500000   0.53688898
  0.45500000   0.53688898
  0.45500000   0.53688899
  0.45500000   0.53688900
  0.45500000   0.53688900
  0.45500000   0.53688901
  0.45500000   0.53688901
  0.45500000   0.53688902
  0.45500000   0.53688903
  0.45500000   0.53688903
  0.45500000   0.53688904
  0.45500000   0.53688904
  0.45500000   0.53688905
  0.45500000   0.53688905
  0.45500000   0.53688906
  0.45500000   0.53688907
  0.45600000   0.53736005
  0.45600000   0.53736005
  0.45600000   0.53736006
  0.45600000   0.53736007
  0.45600000   0.53736007
  0.45600000   0.53736008
  0.45600000   0.53736008
  0.45600000   0.53736009
  0.45600000   0.53736010
  0.45600000   0.53736010
  0.45600000   0.53736011
  0.45600000   0.53736012
  0.45600000   0.53736012
  0.45600000   0.53736013
  0.45600000   0.53736013
  0.45600000   0.53736014
  0.45600000   0.53736015
  0.45600000   0.53736015
  0.45600000   0.53736016
  0.45600000   0.53736016
  0.45600000   0.53736017
  0.45600000   0.53736018
  0.45600000   0.53736018
  0.45600000   0.53736019
  0.45600000   0.53736019
  0.45600000   0.53736020
  0.45600000   0.53736021
  0.45600000   0.53736021
  0.45600000   0.53736022
  0.45600000   0.53736022
  0.45600000   0.53736023
  0.45600000   0.53736024
  0.45600000   0.53736024
  0.45600000   0.53736025
  0.45600000   0.53736025
  0.45600000   0.53736026
  0.45600000   0.53736027
  0.45600000   0.53736027
  0.45600000   0.53736028
  0.45600000   0.53736028
  0.45700000   0.53783018
  0.45700000   0.53783019
  0.45700000   0.53783019
  0.45700000   0.53783020
  0.45700000   0.53783021
  0.45700000   0.53783021
  0.45700000   0.53783022
  0.45700000   0.53783023
  0.45700000   0.53783023
  0.45700000   0.53783024
  0.45700000   0.53783024
  0.45700000   0.53783025
  0.45700000   0.53783026
  0.45700000   0.53783026
  0.45700000   0.53783027
  0.45700000   0.53783028
  0.45700000   0.53783028
  0.45700000   0.53783029
  0.45700000   0.53783029
  0.45700000   0.53783030
  0.45700000   0.53783031
  0.45700000   0.53783031
  0.45700000   0.53783032
  0.45700000   0.53783032
  0.45700000   0.53783033
  0.45700000   0.53783034
  0.45700000   0.53783034
  0.45700000   0.53783035
  0.45700000   0.53783035
  0.45700000   0.53783036
  0.45700000   0.53783037
  0.45700000   0.53783037
  0.45700000   0.53783038
  0.45700000   0.53783038
  0.45700000   0.53783039
  0.45700000   0.53783040
  0.45700000   0.53783040
  0.45700000   0.53783041
  0.45700000   0.53783041
  0.45700000   0.53783042
  0.45800000   0.53829924
  0.45800000   0.53829925
  0.45800000   0.53829925
  0.45800000   0.53829926
  0.45800000   0.53829926
  0.45800000   0.53829927
  0.45800000   0.53829928
  0.45800000   0.53829928
  0.45800000   0.53829929
  0.45800000   0.53829930
  0.45800000   0.53829930
  0.45800000   0.53829931
  0.45800000   0.53829931
  0.45800000   0.53829932
  0.45800000   0.53829933
  0.45800000   0.53829933
  0.45800000   0.53829934
  0.45800000   0.53829935
  0.45800000   0.53829935
  0.45800000   0.53829936
  0.45800000   0.53829936
  0.45800000   0.53829937
  0.45800000   0.53829938
  0.45800000   0.53829938
  0.45800000   0.53829939
  0.45800000   0.53829939
  0.45800000   0.53829940
  0.45800000   0.53829941
  0.45800000   0.53829941
  0.45800000   0.53829942
  0.45800000   0.53829942
  0.45800000   0.53829943
  0.45800000   0.53829944
  0.45800000   0.53829944
  0.45800000   0.53829945
  0.45800000   0.53829945
  0.45800000   0.53829946
  0.45800000   0.53829946
  0.45800000   0.53829947
  0.45800000   0.53829948
  0.45900000   0.53876722
  0.45900000   0.53876723
  0.45900000   0.53876724
  0.45900000   0.53876724
  0.45900000   0.53876725
  0.45900000   0.53876726
  0.45900000   0.53876726
  0.45900000   0.53876727
  0.45900000   0.53876727
  0.45900000   0.53876728
  0.45900000   0.53876729
  0.45900000   0.53876729
  0.45900000   0.53876730
  0.45900000   0.53876730
  0.45900000   0.53876731
  0.45900000   0.53876732
  0.45900000   0.53876732
  0.45900000   0.53876733
  0.45900000   0.53876734
  0.45900000   0.53876734
  0.45900000   0.53876735
  0.45900000   0.53876735
  0.45900000   0.53876736
  0.45900000   0.53876737
  0.45900000   0.53876737
  0.45900000   0.53876738
  0.45900000   0.53876738
  0.45900000   0.53876739
  0.45900000   0.53876740
  0.45900000   0.53876740
  0.45900000   0.53876741
  0.45900000   0.53876741
  0.45900000   0.53876742
  0.45900000   0.53876743
  0.45900000   0.53876743
  0.45900000   0.53876744
  0.45900000   0.53876744
  0.45900000   0.53876745
  0.45900000   0.53876746
  0.45900000   0.53876746
  0.46000000   0.53923414
  0.46000000   0.53923415
  0.46000000   0.53923415
  0.46000000   0.53923416
  0.46000000   0.53923416
  0.46000000   0.53923417
  0.46000000   0.53923418
  0.46000000   0.53923418
  0.46000000   0.53923419
  0.46000000   0.53923420
  0.46000000   0.53923420
  0.46000000   0.53923421
  0.46000000   0.53923421
  0.46000000   0.53923422
  0.46000000   0.53923423
  0.46000000   0.53923423
  0.46000000   0.53923424
  0.46000000   0.53923424
  0.46000000   0.53923425
  0.46000000   0.53923426
  0.46000000   0.53923426
  0.46000000   0.53923427
  0.46000000   0.53923428
  0.46000000   0.53923428
  0.46000000   0.53923429
  0.46000000   0.53923429
  0.46000000   0.53923430
  0.46000000   0.53923431
  0.46000000   0.53923431
  0.46000000   0.53923432
  0.46000000   0.53923432
  0.46000000   0.53923433
  0.46000000   0.53923434
  0.46000000   0.53923434
  0.46000000   0.53923435
  0.46000000   0.53923435
  0.46000000   0.53923436
  0.46000000   0.53923436
  0.46000000   0.53923437
  0.46000000   0.53923438
  0.46100000   0.53969999
  0.46100000   0.53970000
  0.46100000   0.53970000
  0.46100000   0.53970001
  0.46100000   0.53970001
  0.46100000   0.53970002
  0.46100000   0.53970003
  0.46100000   0.53970003
  0.46100000   0.53970004
  0.46100000   0.53970005
  0.46100000   0.53970005
  0.46100000   0.53970006
  0.46100000   0.53970006
  0.46100000   0.53970007
  0.46100000   0.53970008
  0.46100000   0.53970008
  0.46100000   0.53970009
  0.46100000   0.53970010
  0.46100000   0.53970010
  0.46100000   0.53970011
  0.46100000   0.53970011
  0.46100000   0.53970012
  0.46100000   0.53970013
  0.46100000   0.53970013
  0.46100000   0.53970014
  0.46100000   0.53970014
  0.46100000   0.53970015
  0.46100000   0.53970016
  0.46100000   0.53970016
  0.46100000   0.53970017
  0.46100000   0.53970017
  0.46100000   0.53970018
  0.46100000   0.53970019
  0.46100000   0.53970019
  0.46100000   0.53970020
  0.46100000   0.53970020
  0.46100000   0.53970021
  0.46100000   0.53970022
  0.46100000   0.53970022
  0.46100000   0.53970023
  0.46200000   0.54016478
  0.46200000   0.54016479
  0.46200000   0.54016479
  0.46200000   0.54016480
  0.46200000   0.54016480
  0.46200000   0.54016481
  0.46200000   0.54016482
  0.46200000   0.54016482
  0.46200000   0.54016483
  0.46200000   0.54016484
  0.46200000   0.54016484
  0.46200000   0.54016485
  0.46200000   0.54016485
  0.46200000   0.54016486
  0.46200000   0.54016487
  0.46200000   0.54016487
  0.46200000   0.54016488
  0.46200000   0.54016489
  0.46200000   0.54016489
  0.46200000   0.54016490
  0.46200000   0.54016490
  0.46200000   0.54016491
  0.46200000   0.54016492
  0.46200000   0.54016492
  0.46200000   0.54016493
  0.46200000   0.54016493
  0.46200000   0.54016494
  0.46200000   0.54016495
  0.46200000   0.54016495
  0.46200000   0.54016496
  0.46200000   0.54016496
  0.46200000   0.54016497
  0.46200000   0.54016498
  0.46200000   0.54016498
  0.46200000   0.54016499
  0.46200000   0.54016499
  0.46200000   0.54016500
  0.46200000   0.54016501
  0.46200000   0.54016501
  0.46200000   0.54016502
  0.46300000   0.54062851
  0.46300000   0.54062852
  0.46300000   0.54062852
  0.46300000   0.54062853
  0.46300000   0.54062854
  0.46300000   0.54062854
  0.46300000   0.54062855
  0.46300000   0.54062856
  0.46300000   0.54062856
  0.46300000   0.54062857
  0.46300000   0.54062858
  0.46300000   0.54062858
  0.46300000   0.54062859
  0.46300000   0.54062859
  0.46300000   0.54062860
  0.46300000   0.54062861
  0.46300000   0.54062861
  0.46300000   0.54062862
  0.46300000   0.54062862
  0.46300000   0.54062863
  0.46300000   0.54062864
  0.46300000   0.54062864
  0.46300000   0.54062865
  0.46300000   0.54062865
  0.46300000   0.54062866
  0.46300000   0.54062867
  0.46300000   0.54062867
  0.46300000   0.54062868
  0.46300000   0.54062869
  0.46300000   0.54062869
  0.46300000   0.54062870
  0.46300000   0.54062870
  0.46300000   0.54062871
  0.46300000   0.54062872
  0.46300000   0.54062872
  0.46300000   0.54062873
  0.46300000   0.54062873
  0.46300000   0.54062874
  0.46300000   0.54062874
  0.46300000   0.54062875
  0.46400000   0.54109119
  0.46400000   0.54109120
  0.46400000   0.54109121
  0.46400000   0.54109121
  0.46400000   0.54109122
  0.46400000   0.54109122
  0.46400000   0.54109123
  0.46400000   0.54109124
  0.46400000   0.54109124
  0.46400000   0.54109125
  0.46400000   0.54109126
  0.46400000   0.54109126
  0.46400000   0.54109127
  0.46400000   0.54109127
  0.46400000   0.54109128
  0.46400000   0.54109129
  0.46400000   0.54109129
  0.46400000   0.54109130
  0.46400000   0.54109131
  0.46400000   0.54109131
  0.46400000   0.54109132
  0.46400000   0.54109132
  0.46400000   0.54109133
  0.46400000   0.54109134
  0.46400000   0.54109134
  0.46400000   0.54109135
  0.46400000   0.54109135
  0.46400000   0.54109136
  0.46400000   0.54109137
  0.46400000   0.54109137
  0.46400000   0.54109138
  0.46400000   0.54109138
  0.46400000   0.54109139
  0.46400000   0.54109140
  0.46400000   0.54109140
  0.46400000   0.54109141
  0.46400000   0.54109141
  0.46400000   0.54109142
  0.46400000   0.54109143
  0.46400000   0.54109143
  0.46500000   0.54155282
  0.46500000   0.54155283
  0.46500000   0.54155284
  0.46500000   0.54155284
  0.46500000   0.54155285
  0.46500000   0.54155286
  0.46500000   0.54155286
  0.46500000   0.54155287
  0.46500000   0.54155288
  0.46500000   0.54155288
  0.46500000   0.54155289
  0.46500000   0.54155289
  0.46500000   0.54155290
  0.46500000   0.54155291
  0.46500000   0.54155291
  0.46500000   0.54155292
  0.46500000   0.54155293
  0.46500000   0.54155293
  0.46500000   0.54155294
  0.46500000   0.54155294
  0.46500000   0.54155295
  0.46500000   0.54155296
  0.46500000   0.54155296
  0.46500000   0.54155297
  0.46500000   0.54155297
  0.46500000   0.54155298
  0.46500000   0.54155299
  0.46500000   0.54155299
  0.46500000   0.54155300
  0.46500000   0.54155300
  0.46500000   0.54155301
  0.46500000   0.54155302
  0.46500000   0.54155302
  0.46500000   0.54155303
  0.46500000   0.54155303
  0.46500000   0.54155304
  0.46500000   0.54155305
  0.46500000   0.54155305
  0.46500000   0.54155306
  0.46500000   0.54155306
  0.46600000   0.54201341
  0.46600000   0.54201342
  0.46600000   0.54201343
  0.46600000   0.54201343
  0.46600000   0.54201344
  0.46600000   0.54201344
  0.46600000   0.54201345
  0.46600000   0.54201346
  0.46600000   0.54201346
  0.46600000   0.54201347
  0.46600000   0.54201348
  0.46600000   0.54201348
  0.46600000   0.54201349
  0.46600000   0.54201349
  0.46600000   0.54201350
  0.46600000   0.54201351
  0.46600000   0.54201351
  0.46600000   0.54201352
  0.46600000   0.54201353
  0.46600000   0.54201353
  0.46600000   0.54201354
  0.46600000   0.54201354
  0.46600000   0.54201355
  0.46600000   0.54201356
  0.46600000   0.54201356
  0.46600000   0.54201357
  0.46600000   0.54201357
  0.46600000   0.54201358
  0.46600000   0.54201359
  0.46600000   0.54201359
  0.46600000   0.54201360
  0.46600000   0.54201360
  0.46600000   0.54201361
  0.46600000   0.54201362
  0.46600000   0.54201362
  0.46600000   0.54201363
  0.46600000   0.54201363
  0.46600000   0.54201364
  0.46600000   0.54201365
  0.46600000   0.54201365
  0.46700000   0.54247296
  0.46700000   0.54247297
  0.46700000   0.54247297
  0.46700000   0.54247298
  0.46700000   0.54247299
  0.46700000   0.54247299
  0.46700000   0.54247300
  0.46700000   0.54247300
  0.46700000   0.54247301
  0.46700000   0.54247302
  0.46700000   0.54247302
  0.46700000   0.54247303
  0.46700000   0.54247304
  0.46700000   0.54247304
  0.46700000   0.54247305
  0.46700000   0.54247305
  0.46700000   0.54247306
  0.46700000   0.54247307
  0.46700000   0.54247307
  0.46700000   0.54247308
  0.46700000   0.54247309
  0.46700000   0.54247309
  0.46700000   0.54247310
  0.46700000   0.54247310
  0.46700000   0.54247311
  0.46700000   0.54247312
  0.46700000   0.54247312
  0.46700000   0.54247313
  0.46700000   0.54247313
  0.46700000   0.54247314
  0.46700000   0.54247315
  0.46700000   0.54247315
  0.46700000   0.54247316
  0.46700000   0.54247316
  0.46700000   0.54247317
  0.46700000   0.54247318
  0.46700000   0.54247318
  0.46700000   0.54247319
  0.46700000   0.54247319
  0.46700000   0.54247320
  0.46800000   0.54293147
  0.46800000   0.54293148
  0.46800000   0.54293148
  0.46800000   0.54293149
  0.46800000   0.54293150
  0.46800000   0.54293150
  0.46800000   0.54293151
  0.46800000   0.54293152
  0.46800000   0.54293152
  0.46800000   0.54293153
  0.46800000   0.54293154
  0.46800000   0.54293154
  0.46800000   0.54293155
  0.46800000   0.54293155
  0.46800000   0.54293156
  0.46800000   0.54293157
  0.46800000   0.54293157
  0.46800000   0.54293158
  0.46800000   0.54293158
  0.46800000   0.54293159
  0.46800000   0.54293160
  0.46800000   0.54293160
  0.46800000   0.54293161
  0.46800000   0.54293162
  0.46800000   0.54293162
  0.46800000   0.54293163
  0.46800000   0.54293163
  0.46800000   0.54293164
  0.46800000   0.54293165
  0.46800000   0.54293165
  0.46800000   0.54293166
  0.46800000   0.54293166
  0.46800000   0.54293167
  0.46800000   0.54293168
  0.46800000   0.54293168
  0.46800000   0.54293169
  0.46800000   0.54293169
  0.46800000   0.54293170
  0.46800000   0.54293171
  0.46800000   0.54293171
  0.46900000   0.54338895
  0.46900000   0.54338896
  0.46900000   0.54338896
  0.46900000   0.54338897
  0.46900000   0.54338898
  0.46900000   0.54338898
  0.46900000   0.54338899
  0.46900000   0.54338900
  0.46900000   0.54338900
  0.46900000   0.54338901
  0.46900000   0.54338901
  0.46900000   0.54338902
  0.46900000   0.54338903
  0.46900000   0.54338903
  0.46900000   0.54338904
  0.46900000   0.54338905
  0.46900000   0.54338905
  0.46900000   0.54338906
  0.46900000   0.54338906
  0.46900000   0.54338907
  0.46900000   0.54338908
  0.46900000   0.54338908
  0.46900000   0.54338909
  0.46900000   0.54338909
  0.46900000   0.54338910
  0.46900000   0.54338911
  0.46900000   0.54338911
  0.46900000   0.54338912
  0.46900000   0.54338913
  0.46900000   0.54338913
  0.46900000   0.54338914
  0.46900000   0.54338914
  0.46900000   0.54338915
  0.46900000   0.54338916
  0.46900000   0.54338916
  0.46900000   0.54338917
  0.46900000   0.54338917
  0.46900000   0.54338918
  0.46900000   0.54338919
  0.46900000   0.54338919
  0.47000000   0.54384540
  0.47000000   0.54384541
  0.47000000   0.54384541
  0.47000000   0.54384542
  0.47000000   0.54384543
  0.47000000   0.54384543
  0.47000000   0.54384544
  0.47000000   0.54384545
  0.47000000   0.54384545
  0.47000000   0.54384546
  0.47000000   0.54384547
  0.47000000   0.54384547
  0.47000000   0.54384548
  0.47000000   0.54384548
  0.47000000   0.54384549
  0.47000000   0.54384550
  0.47000000   0.54384550
  0.47000000   0.54384551
  0.47000000   0.54384552
  0.47000000   0.54384552
  0.47000000   0.54384553
  0.47000000   0.54384553
  0.47000000   0.54384554
  0.47000000   0.54384555
  0.47000000   0.54384555
  0.47000000   0.54384556
  0.47000000   0.54384556
  0.47000000   0.54384557
  0.47000000   0.54384558
  0.47000000   0.54384558
  0.47000000   0.54384559
  0.47000000   0.54384559
  0.47000000   0.54384560
  0.47000000   0.54384561
  0.47000000   0.54384561
  0.47000000   0.54384562
  0.47000000   0.54384562
  0.47000000   0.54384563
  0.47000000   0.54384564
  0.47000000   0.54384564
  0.47100000   0.54430083
  0.47100000   0.54430083
  0.47100000   0.54430084
  0.47100000   0.54430085
  0.47100000   0.54430085
  0.47100000   0.54430086
  0.47100000   0.54430087
  0.47100000   0.54430087
  0.47100000   0.54430088
  0.47100000   0.54430089
  0.47100000   0.54430089
  0.47100000   0.54430090
  0.47100000   0.54430090
  0.47100000   0.54430091
  0.47100000   0.54430092
  0.47100000   0.54430092
  0.47100000   0.54430093
  0.47100000   0.54430094
  0.47100000   0.54430094
  0.47100000   0.54430095
  0.47100000   0.54430095
  0.47100000   0.54430096
  0.47100000   0.54430097
  0.47100000   0.54430097
  0.47100000   0.54430098
  0.47100000   0.54430098
  0.47100000   0.54430099
  0.47100000   0.54430100
  0.47100000   0.54430100
  0.47100000   0.54430101
  0.47100000   0.54430102
  0.47100000   0.54430102
  0.47100000   0.54430103
  0.47100000   0.54430103
  0.47100000   0.54430104
  0.47100000   0.54430105
  0.47100000   0.54430105
  0.47100000   0.54430106
  0.47100000   0.54430106
  0.47100000   0.54430107
  0.47200000   0.54475523
  0.47200000   0.54475524
  0.47200000   0.54475525
  0.47200000   0.54475525
  0.47200000   0.54475526
  0.47200000   0.54475527
  0.47200000   0.54475527
  0.47200000   0.54475528
  0.47200000   0.54475529
  0.47200000   0.54475529
  0.47200000   0.54475530
  0.47200000   0.54475530
  0.47200000   0.54475531
  0.47200000   0.54475532
  0.47200000   0.54475532
  0.47200000   0.54475533
  0.47200000   0.54475534
  0.47200000   0.54475534
  0.47200000   0.54475535
  0.47200000   0.54475535
  0.47200000   0.54475536
  0.47200000   0.54475537
  0.47200000   0.54475537
  0.47200000   0.54475538
  0.47200000   0.54475538
  0.47200000   0.54475539
  0.47200000   0.54475540
  0.47200000   0.54475540
  0.47200000   0.54475541
  0.47200000   0.54475542
  0.47200000   0.54475542
  0.47200000   0.54475543
  0.47200000   0.54475543
  0.47200000   0.54475544
  0.47200000   0.54475545
  0.47200000   0.54475545
  0.47200000   0.54475546
  0.47200000   0.54475546
  0.47200000   0.54475547
  0.47200000   0.54475548
  0.47300000   0.54520862
  0.47300000   0.54520863
  0.47300000   0.54520864
  0.47300000   0.54520864
  0.47300000   0.54520865
  0.47300000   0.54520866
  0.47300000   0.54520866
  0.47300000   0.54520867
  0.47300000   0.54520867
  0.47300000   0.54520868
  0.47300000   0.54520869
  0.47300000   0.54520869
  0.47300000   0.54520870
  0.47300000   0.54520871
  0.47300000   0.54520871
  0.47300000   0.54520872
  0.47300000   0.54520872
  0.47300000   0.54520873
  0.47300000   0.54520874
  0.47300000   0.54520874
  0.47300000   0.54520875
  0.47300000   0.54520876
  0.47300000   0.54520876
  0.47300000   0.54520877
  0.47300000   0.54520877
  0.47300000   0.54520878
  0.47300000   0.54520879
  0.47300000   0.54520879
  0.47300000   0.54520880
  0.47300000   0.54520880
  0.47300000   0.54520881
  0.47300000   0.54520882
  0.47300000   0.54520882
  0.47300000   0.54520883
  0.47300000   0.54520884
  0.47300000   0.54520884
  0.47300000   0.54520885
  0.47300000   0.54520885
  0.47300000   0.54520886
  0.47300000   0.54520887
  0.47400000   0.54566100
  0.47400000   0.54566101
  0.47400000   0.54566101
  0.47400000   0.54566102
  0.47400000   0.54566103
  0.47400000   0.54566103
  0.47400000   0.54566104
  0.47400000   0.54566105
  0.47400000   0.54566105
  0.47400000   0.54566106
  0.47400000   0.54566106
  0.47400000   0.54566107
  0.47400000   0.54566108
  0.47400000   0.54566108
  0.47400000   0.54566109
  0.47400000   0.54566110
  0.47400000   0.54566110
  0.47400000   0.54566111
  0.47400000   0.54566111
  0.47400000   0.54566112
  0.47400000   0.54566113
  0.47400000   0.54566113
  0.47400000   0.54566114
  0.47400000   0.54566115
  0.47400000   0.54566115
  0.47400000   0.54566116
  0.47400000   0.54566116
  0.47400000   0.54566117
  0.47400000   0.54566118
  0.47400000   0.54566118
  0.47400000   0.54566119
  0.47400000   0.54566119
  0.47400000   0.54566120
  0.47400000   0.54566121
  0.47400000   0.54566121
  0.47400000   0.54566122
  0.47400000   0.54566122
  0.47400000   0.54566123
  0.47400000   0.54566124
  0.47400000   0.54566124
  0.47500000   0.54611237
  0.47500000   0.54611237
  0.47500000   0.54611238
  0.47500000   0.54611239
  0.47500000   0.54611239
  0.47500000   0.54611240
  0.47500000   0.54611241
  0.47500000   0.54611241
  0.47500000   0.54611242
  0.47500000   0.54611243
  0.47500000   0.54611243
  0.47500000   0.54611244
  0.47500000   0.54611244
  0.47500000   0.54611245
  0.47500000   0.54611246
  0.47500000   0.54611246
  0.47500000   0.54611247
  0.47500000   0.54611248
  0.47500000   0.54611248
  0.47500000   0.54611249
  0.47500000   0.54611249
  0.47500000   0.54611250
  0.47500000   0.54611251
  0.47500000   0.54611251
  0.47500000   0.54611252
  0.47500000   0.54611253
  0.47500000   0.54611253
  0.47500000   0.54611254
  0.47500000   0.54611254
  0.47500000   0.54611255
  0.47500000   0.54611256
  0.47500000   0.54611256
  0.47500000   0.54611257
  0.47500000   0.54611257
  0.47500000   0.54611258
  0.47500000   0.54611259
  0.47500000   0.54611259
  0.47500000   0.54611260
  0.47500000   0.54611260
  0.47500000   0.54611261
  0.47600000   0.54656273
  0.47600000   0.54656274
  0.47600000   0.54656274
  0.47600000   0.54656275
  0.47600000   0.54656276
  0.47600000   0.54656276
  0.47600000   0.54656277
  0.47600000   0.54656278
  0.47600000   0.54656278
  0.47600000   0.54656279
  0.47600000   0.54656280
  0.47600000   0.54656280
  0.47600000   0.54656281
  0.47600000   0.54656281
  0.47600000   0.54656282
  0.47600000   0.54656283
  0.47600000   0.54656283
  0.47600000   0.54656284
  0.47600000   0.54656285
  0.47600000   0.54656285
  0.47600000   0.54656286
  0.47600000   0.54656286
  0.47600000   0.54656287
  0.47600000   0.54656288
  0.47600000   0.54656288
  0.47600000   0.54656289
  0.47600000   0.54656289
  0.47600000   0.54656290
  0.47600000   0.54656291
  0.47600000   0.54656291
  0.47600000   0.54656292
  0.47600000   0.54656293
  0.47600000   0.54656293
  0.47600000   0.54656294
  0.47600000   0.54656294
  0.47600000   0.54656295
  0.47600000   0.54656296
  0.47600000   0.54656296
  0.47600000   0.54656297
  0.47600000   0.54656297
  0.47700000   0.54701209
  0.47700000   0.54701210
  0.47700000   0.54701211
  0.47700000   0.54701211
  0.47700000   0.54701212
  0.47700000   0.54701213
  0.47700000   0.54701213
  0.47700000   0.54701214
  0.47700000   0.54701214
  0.47700000   0.54701215
  0.47700000   0.54701216
  0.47700000   0.54701216
  0.47700000   0.54701217
  0.47700000   0.54701218
  0.47700000   0.54701218
  0.47700000   0.54701219
  0.47700000   0.54701219
  0.47700000   0.54701220
  0.47700000   0.54701221
  0.47700000   0.54701221
  0.47700000   0.54701222
  0.47700000   0.54701223
  0.47700000   0.54701223
  0.47700000   0.54701224
  0.47700000   0.54701224
  0.47700000   0.54701225
  0.47700000   0.54701226
  0.47700000   0.54701226
  0.47700000   0.54701227
  0.47700000   0.54701228
  0.47700000   0.54701228
  0.47700000   0.54701229
  0.47700000   0.54701229
  0.47700000   0.54701230
  0.47700000   0.54701231
  0.47700000   0.54701231
  0.47700000   0.54701232
  0.47700000   0.54701232
  0.47700000   0.54701233
  0.47700000   0.54701234
  0.47800000   0.54746046
  0.47800000   0.54746046
  0.47800000   0.54746047
  0.47800000   0.54746048
  0.47800000   0.54746048
  0.47800000   0.54746049
  0.47800000   0.54746050
  0.47800000   0.54746050
  0.47800000   0.54746051
  0.47800000   0.54746052
  0.47800000   0.54746052
  0.47800000   0.54746053
  0.47800000   0.54746053
  0.47800000   0.54746054
  0.47800000   0.54746055
  0.47800000   0.54746055
  0.47800000   0.54746056
  0.47800000   0.54746057
  0.47800000   0.54746057
  0.47800000   0.54746058
  0.47800000   0.54746058
  0.47800000   0.54746059
  0.47800000   0.54746060
  0.47800000   0.54746060
  0.47800000   0.54746061
  0.47800000   0.54746062
  0.47800000   0.54746062
  0.47800000   0.54746063
  0.47800000   0.54746063
  0.47800000   0.54746064
  0.47800000   0.54746065
  0.47800000   0.54746065
  0.47800000   0.54746066
  0.47800000   0.54746066
  0.47800000   0.54746067
  0.47800000   0.54746068
  0.47800000   0.54746068
  0.47800000   0.54746069
  0.47800000   0.54746069
  0.47800000   0.54746070
  0.47900000   0.54790783
  0.47900000   0.54790783
  0.47900000   0.54790784
  0.47900000   0.54790785
  0.47900000   0.54790785
  0.47900000   0.54790786
  0.47900000   0.54790787
  0.47900000   0.54790787
  0.47900000   0.54790788
  0.47900000   0.54790789
  0.47900000   0.54790789
  0.47900000   0.54790790
  0.47900000   0.54790791
  0.47900000   0.54790791
  0.47900000   0.54790792
  0.47900000   0.54790792
  0.47900000   0.54790793
  0.47900000   0.54790794
  0.47900000   0.54790794
  0.47900000   0.54790795
  0.47900000   0.54790796
  0.47900000   0.54790796
  0.47900000   0.54790797
  0.47900000   0.54790797
  0.47900000   0.54790798
  0.47900000   0.54790799
  0.47900000   0.54790799
  0.47900000   0.54790800
  0.47900000   0.54790800
  0.47900000   0.54790801
  0.47900000   0.54790802
  0.47900000   0.54790802
  0.47900000   0.54790803
  0.47900000   0.54790804
  0.47900000   0.54790804
  0.47900000   0.54790805
  0.47900000   0.54790805
  0.47900000   0.54790806
  0.47900000   0.54790807
  0.47900000   0.54790807
  0.48000000   0.54835421
  0.48000000   0.54835422
  0.48000000   0.54835422
  0.48000000   0.54835423
  0.48000000   0.54835424
  0.48000000   0.54835424
  0.48000000   0.54835425
  0.48000000   0.54835425
  0.48000000   0.54835426
  0.48000000   0.54835427
  0.48000000   0.54835427
  0.48000000   0.54835428
  0.48000000   0.54835429
  0.48000000   0.54835429
  0.48000000   0.54835430
  0.48000000   0.54835431
  0.48000000   0.54835431
  0.48000000   0.54835432
  0.48000000   0.54835432
  0.48000000   0.54835433
  0.48000000   0.54835434
  0.48000000   0.54835434
  0.48000000   0.54835435
  0.48000000   0.54835436
  0.48000000   0.54835436
  0.48000000   0.54835437
  0.48000000   0.54835437
  0.48000000   0.54835438
  0.48000000   0.54835439
  0.48000000   0.54835439
  0.48000000   0.54835440
  0.48000000   0.54835440
  0.48000000   0.54835441
  0.48000000   0.54835442
  0.48000000   0.54835442
  0.48000000   0.54835443
  0.48000000   0.54835443
  0.48000000   0.54835444
  0.48000000   0.54835445
  0.48000000   0.54835445
  0.48100000   0.54879960
  0.48100000   0.54879961
  0.48100000   0.54879962
  0.48100000   0.54879962
  0.48100000   0.54879963
  0.48100000   0.54879964
  0.48100000   0.54879964
  0.48100000   0.54879965
  0.48100000   0.54879966
  0.48100000   0.54879966
  0.48100000   0.54879967
  0.48100000   0.54879967
  0.48100000   0.54879968
  0.48100000   0.54879969
  0.48100000   0.54879969
  0.48100000   0.54879970
  0.48100000   0.54879971
  0.48100000   0.54879971
  0.48100000   0.54879972
  0.48100000   0.54879973
  0.48100000   0.54879973
  0.48100000   0.54879974
  0.48100000   0.54879974
  0.48100000   0.54879975
  0.48100000   0.54879976
  0.48100000   0.54879976
  0.48100000   0.54879977
  0.48100000   0.54879977
  0.48100000   0.54879978
  0.48100000   0.54879979
  0.48100000   0.54879979
  0.48100000   0.54879980
  0.48100000   0.54879981
  0.48100000   0.54879981
  0.48100000   0.54879982
  0.48100000   0.54879982
  0.48100000   0.54879983
  0.48100000   0.54879984
  0.48100000   0.54879984
  0.48100000   0.54879985
  0.48200000   0.54924402
  0.48200000   0.54924402
  0.48200000   0.54924403
  0.48200000   0.54924404
  0.48200000   0.54924404
  0.48200000   0.54924405
  0.48200000   0.54924406
  0.48200000   0.54924406
  0.48200000   0.54924407
  0.48200000   0.54924407
  0.48200000   0.54924408
  0.48200000   0.54924409
  0.48200000   0.54924409
  0.48200000   0.54924410
  0.48200000   0.54924411
  0.48200000   0.54924411
  0.48200000   0.54924412
  0.48200000   0.54924413
  0.48200000   0.54924413
  0.48200000   0.54924414
  0.48200000   0.54924414
  0.48200000   0.54924415
  0.48200000   0.54924416
  0.48200000   0.54924416
  0.48200000   0.54924417
  0.48200000   0.54924418
  0.48200000   0.54924418
  0.48200000   0.54924419
  0.48200000   0.54924419
  0.48200000   0.54924420
  0.48200000   0.54924421
  0.48200000   0.54924421
  0.48200000   0.54924422
  0.48200000   0.54924422
  0.48200000   0.54924423
  0.48200000   0.54924424
  0.48200000   0.54924424
  0.48200000   0.54924425
  0.48200000   0.54924425
  0.48200000   0.54924426
  0.48300000   0.54968745
  0.48300000   0.54968746
  0.48300000   0.54968746
  0.48300000   0.54968747
  0.48300000   0.54968748
  0.48300000   0.54968748
  0.48300000   0.54968749
  0.48300000   0.54968750
  0.48300000   0.54968750
  0.48300000   0.54968751
  0.48300000   0.54968751
  0.48300000   0.54968752
  0.48300000   0.54968753
  0.48300000   0.54968753
  0.48300000   0.54968754
  0.48300000   0.54968755
  0.48300000   0.54968755
  0.48300000   0.54968756
  0.48300000   0.54968757
  0.48300000   0.54968757
  0.48300000   0.54968758
  0.48300000   0.54968758
  0.48300000   0.54968759
  0.48300000   0.54968760
  0.48300000   0.54968760
  0.48300000   0.54968761
  0.48300000   0.54968761
  0.48300000   0.54968762
  0.48300000   0.54968763
  0.48300000   0.54968763
  0.48300000   0.54968764
  0.48300000   0.54968765
  0.48300000   0.54968765
  0.48300000   0.54968766
  0.48300000   0.54968766
  0.48300000   0.54968767
  0.48300000   0.54968768
  0.48300000   0.54968768
  0.48300000   0.54968769
  0.48300000   0.54968769
  0.48400000   0.55012991
  0.48400000   0.55012992
  0.48400000   0.55012992
  0.48400000   0.55012993
  0.48400000   0.55012993
  0.48400000   0.55012994
  0.48400000   0.55012995
  0.48400000   0.55012995
  0.48400000   0.55012996
  0.48400000   0.55012997
  0.48400000   0.55012997
  0.48400000   0.55012998
  0.48400000   0.55012999
  0.48400000   0.55012999
  0.48400000   0.55013000
  0.48400000   0.55013000
  0.48400000   0.55013001
  0.48400000   0.55013002
  0.48400000   0.55013002
  0.48400000   0.55013003
  0.48400000   0.55013004
  0.48400000   0.55013004
  0.48400000   0.55013005
  0.48400000   0.55013006
  0.48400000   0.55013006
  0.48400000   0.55013007
  0.48400000   0.55013007
  0.48400000   0.55013008
  0.48400000   0.55013009
  0.48400000   0.55013009
  0.48400000   0.55013010
  0.48400000   0.55013010
  0.48400000   0.55013011
  0.48400000   0.55013012
  0.48400000   0.55013012
  0.48400000   0.55013013
  0.48400000   0.55013013
  0.48400000   0.55013014
  0.48400000   0.55013015
  0.48400000   0.55013015
  0.48500000   0.55057140
  0.48500000   0.55057140
  0.48500000   0.55057141
  0.48500000   0.55057142
  0.48500000   0.55057142
  0.48500000   0.55057143
  0.48500000   0.55057143
  0.48500000   0.55057144
  0.48500000   0.55057145
  0.48500000   0.55057145
  0.48500000   0.55057146
  0.48500000   0.55057147
  0.48500000   0.55057147
  0.48500000   0.55057148
  0.48500000   0.55057149
  0.48500000   0.55057149
  0.48500000   0.55057150
  0.48500000   0.55057150
  0.48500000   0.55057151
  0.48500000   0.55057152
  0.48500000   0.55057152
  0.48500000   0.55057153
  0.48500000   0.55057154
  0.48500000   0.55057154
  0.48500000   0.55057155
  0.48500000   0.55057155
  0.48500000   0.55057156
  0.48500000   0.55057157
  0.48500000   0.55057157
  0.48500000   0.55057158
  0.48500000   0.55057159
  0.48500000   0.55057159
  0.48500000   0.55057160
  0.48500000   0.55057160
  0.48500000   0.55057161
  0.48500000   0.55057162
  0.48500000   0.55057162
  0.48500000   0.55057163
  0.48500000   0.55057163
  0.48500000   0.55057164
  0.48600000   0.55101191
  0.48600000   0.55101192
  0.48600000   0.55101193
  0.48600000   0.55101193
  0.48600000   0.55101194
  0.48600000   0.55101195
  0.48600000   0.55101195
  0.48600000   0.55101196
  0.48600000   0.55101197
  0.48600000   0.55101197
  0.48600000   0.55101198
  0.48600000   0.55101199
  0.48600000   0.55101199
  0.48600000   0.55101200
  0.48600000   0.55101200
  0.48600000   0.55101201
  0.48600000   0.55101202
  0.48600000   0.55101202
  0.48600000   0.55101203
  0.48600000   0.55101204
  0.48600000   0.55101204
  0.48600000   0.55101205
  0.48600000   0.55101206
  0.48600000   0.55101206
  0.48600000   0.55101207
  0.48600000   0.55101207
  0.48600000   0.55101208
  0.48600000   0.55101209
  0.48600000   0.55101209
  0.48600000   0.55101210
  0.48600000   0.55101210
  0.48600000   0.55101211
  0.48600000   0.55101212
  0.48600000   0.55101212
  0.48600000   0.55101213
  0.48600000   0.55101214
  0.48600000   0.55101214
  0.48600000   0.55101215
  0.48600000   0.55101215
  0.48600000   0.55101216
  0.48700000   0.55145147
  0.48700000   0.55145148
  0.48700000   0.55145148
  0.48700000   0.55145149
  0.48700000   0.55145150
  0.48700000   0.55145150
  0.48700000   0.55145151
  0.48700000   0.55145152
  0.48700000   0.55145152
  0.48700000   0.55145153
  0.48700000   0.55145153
  0.48700000   0.55145154
  0.48700000   0.55145155
  0.48700000   0.55145155
  0.48700000   0.55145156
  0.48700000   0.55145157
  0.48700000   0.55145157
  0.48700000   0.55145158
  0.48700000   0.55145159
  0.48700000   0.55145159
  0.48700000   0.55145160
  0.48700000   0.55145160
  0.48700000   0.55145161
  0.48700000   0.55145162
  0.48700000   0.55145162
  0.48700000   0.55145163
  0.48700000   0.55145164
  0.48700000   0.55145164
  0.48700000   0.55145165
  0.48700000   0.55145165
  0.48700000   0.55145166
  0.48700000   0.55145167
  0.48700000   0.55145167
  0.48700000   0.55145168
  0.48700000   0.55145168
  0.48700000   0.55145169
  0.48700000   0.55145170
  0.48700000   0.55145170
  0.48700000   0.55145171
  0.48700000   0.55145171
  0.48800000   0.55189006
  0.48800000   0.55189007
  0.48800000   0.55189008
  0.48800000   0.55189008
  0.48800000   0.55189009
  0.48800000   0.55189010
  0.48800000   0.55189010
  0.48800000   0.55189011
  0.48800000   0.55189012
  0.48800000   0.55189012
  0.48800000   0.55189013
  0.48800000   0.55189014
  0.48800000   0.55189014
  0.48800000   0.55189015
  0.48800000   0.55189015
  0.48800000   0.55189016
  0.48800000   0.55189017
  0.48800000   0.55189017
  0.48800000   0.55189018
  0.48800000   0.55189019
  0.48800000   0.55189019
  0.48800000   0.55189020
  0.48800000   0.55189020
  0.48800000   0.55189021
  0.48800000   0.55189022
  0.48800000   0.55189022
  0.48800000   0.55189023
  0.48800000   0.55189024
  0.48800000   0.55189024
  0.48800000   0.55189025
  0.48800000   0.55189025
  0.48800000   0.55189026
  0.48800000   0.55189027
  0.48800000   0.55189027
  0.48800000   0.55189028
  0.48800000   0.55189029
  0.48800000   0.55189029
  0.48800000   0.55189030
  0.48800000   0.55189030
  0.48800000   0.55189031
  0.48900000   0.55232770
  0.48900000   0.55232771
  0.48900000   0.55232771
  0.48900000   0.55232772
  0.48900000   0.55232773
  0.48900000   0.55232773
  0.48900000   0.55232774
  0.48900000   0.55232775
  0.48900000   0.55232775
  0.48900000   0.55232776
  0.48900000   0.55232777
  0.48900000   0.55232777
  0.48900000   0.55232778
  0.48900000   0.55232779
  0.48900000   0.55232779
  0.48900000   0.55232780
  0.48900000   0.55232780
  0.48900000   0.55232781
  0.48900000   0.55232782
  0.48900000   0.55232782
  0.48900000   0.55232783
  0.48900000   0.55232784
  0.48900000   0.55232784
  0.48900000   0.55232785
  0.48900000   0.55232785
  0.48900000   0.55232786
  0.48900000   0.55232787
  0.48900000   0.55232787
  0.48900000   0.55232788
  0.48900000   0.55232789
  0.48900000   0.55232789
  0.48900000   0.55232790
  0.48900000   0.55232790
  0.48900000   0.55232791
  0.48900000   0.55232792
  0.48900000   0.55232792
  0.48900000   0.55232793
  0.48900000   0.55232793
  0.48900000   0.55232794
  0.48900000   0.55232795
  0.49000000   0.55276438
  0.49000000   0.55276439
  0.49000000   0.55276440
  0.49000000   0.55276440
  0.49000000   0.55276441
  0.49000000   0.55276442
  0.49000000   0.55276442
  0.49000000   0.55276443
  0.49000000   0.55276444
  0.49000000   0.55276444
  0.49000000   0.55276445
  0.49000000   0.55276446
  0.49000000   0.55276446
  0.49000000   0.55276447
  0.49000000   0.55276448
  0.49000000   0.55276448
  0.49000000   0.55276449
  0.49000000   0.55276449
  0.49000000   0.55276450
  0.49000000   0.55276451
  0.49000000   0.55276451
  0.49000000   0.55276452
  0.49000000   0.55276453
  0.49000000   0.55276453
  0.49000000   0.55276454
  0.49000000   0.55276454
  0.49000000   0.55276455
  0.49000000   0.55276456
  0.49000000   0.55276456
  0.49000000   0.55276457
  0.49000000   0.55276458
  0.49000000   0.55276458
  0.49000000   0.55276459
  0.49000000   0.55276459
  0.49000000   0.55276460
  0.49000000   0.55276461
  0.49000000   0.55276461
  0.49000000   0.55276462
  0.49000000   0.55276462
  0.49000000   0.55276463
  0.49100000   0.55320012
  0.49100000   0.55320013
  0.49100000   0.55320013
  0.49100000   0.55320014
  0.49100000   0.55320014
  0.49100000   0.55320015
  0.49100000   0.55320016
  0.49100000   0.55320016
  0.49100000   0.55320017
  0.49100000   0.55320018
  0.49100000   0.55320018
  0.49100000   0.55320019
  0.49100000   0.55320020
  0.49100000   0.55320020
  0.49100000   0.55320021
  0.49100000   0.55320022
  0.49100000   0.55320022
  0.49100000   0.55320023
  0.49100000   0.55320023
  0.49100000   0.55320024
  0.49100000   0.55320025
  0.49100000   0.55320025
  0.49100000   0.55320026
  0.49100000   0.55320027
  0.49100000   0.55320027
  0.49100000   0.55320028
  0.49100000   0.55320028
  0.49100000   0.55320029
  0.49100000   0.55320030
  0.49100000   0.55320030
  0.49100000   0.55320031
  0.49100000   0.55320032
  0.49100000   0.55320032
  0.49100000   0.55320033
  0.49100000   0.55320033
  0.49100000   0.55320034
  0.49100000   0.55320035
  0.49100000   0.55320035
  0.49100000   0.55320036
  0.49100000   0.55320036
  0.49200000   0.55363491
  0.49200000   0.55363491
  0.49200000   0.55363492
  0.49200000   0.55363493
  0.49200000   0.55363493
  0.49200000   0.55363494
  0.49200000   0.55363494
  0.49200000   0.55363495
  0.49200000   0.55363496
  0.49200000   0.55363496
  0.49200000   0.55363497
  0.49200000   0.55363498
  0.49200000   0.55363498
  0.49200000   0.55363499
  0.49200000   0.55363500
  0.49200000   0.55363500
  0.49200000   0.55363501
  0.49200000   0.55363502
  0.49200000   0.55363502
  0.49200000   0.55363503
  0.49200000   0.55363503
  0.49200000   0.55363504
  0.49200000   0.55363505
  0.49200000   0.55363505
  0.49200000   0.55363506
  0.49200000   0.55363507
  0.49200000   0.55363507
  0.49200000   0.55363508
  0.49200000   0.55363508
  0.49200000   0.55363509
  0.49200000   0.55363510
  0.49200000   0.55363510
  0.49200000   0.55363511
  0.49200000   0.55363512
  0.49200000   0.55363512
  0.49200000   0.55363513
  0.49200000   0.55363513
  0.49200000   0.55363514
  0.49200000   0.55363515
  0.49200000   0.55363515
  0.49300000   0.55406875
  0.49300000   0.55406876
  0.49300000   0.55406876
  0.49300000   0.55406877
  0.49300000   0.55406878
  0.49300000   0.55406878
  0.49300000   0.55406879
  0.49300000   0.55406880
  0.49300000   0.55406880
  0.49300000   0.55406881
  0.49300000   0.55406881
  0.49300000   0.55406882
  0.49300000   0.55406883
  0.49300000   0.55406883
  0.49300000   0.55406884
  0.49300000   0.55406885
  0.49300000   0.55406885
  0.49300000   0.55406886
  0.49300000   0.55406887
  0.49300000   0.55406887
  0.49300000   0.55406888
  0.49300000   0.55406888
  0.49300000   0.55406889
  0.49300000   0.55406890
  0.49300000   0.55406890
  0.49300000   0.55406891
  0.49300000   0.55406892
  0.49300000   0.55406892
  0.49300000   0.55406893
  0.49300000   0.55406893
  0.49300000   0.55406894
  0.49300000   0.55406895
  0.49300000   0.55406895
  0.49300000   0.55406896
  0.49300000   0.55406897
  0.49300000   0.55406897
  0.49300000   0.55406898
  0.49300000   0.55406898
  0.49300000   0.55406899
  0.49300000   0.55406900
  0.49400000   0.55450165
  0.49400000   0.55450166
  0.49400000   0.55450167
  0.49400000   0.55450167
  0.49400000   0.55450168
  0.49400000   0.55450169
  0.49400000   0.55450169
  0.49400000   0.55450170
  0.49400000   0.55450171
  0.49400000   0.55450171
  0.49400000   0.55450172
  0.49400000   0.55450173
  0.49400000   0.55450173
  0.49400000   0.55450174
  0.49400000   0.55450174
  0.49400000   0.55450175
  0.49400000   0.55450176
  0.49400000   0.55450176
  0.49400000   0.55450177
  0.49400000   0.55450178
  0.49400000   0.55450178
  0.49400000   0.55450179
  0.49400000   0.55450180
  0.49400000   0.55450180
  0.49400000   0.55450181
  0.49400000   0.55450181
  0.49400000   0.55450182
  0.49400000   0.55450183
  0.49400000   0.55450183
  0.49400000   0.55450184
  0.49400000   0.55450185
  0.49400000   0.55450185
  0.49400000   0.55450186
  0.49400000   0.55450186
  0.49400000   0.55450187
  0.49400000   0.55450188
  0.49400000   0.55450188
  0.49400000   0.55450189
  0.49400000   0.55450189
  0.49400000   0.55450190
  0.49500000   0.55493362
  0.49500000   0.55493363
  0.49500000   0.55493364
  0.49500000   0.55493364
  0.49500000   0.55493365
  0.49500000   0.55493366
  0.49500000   0.55493366
  0.49500000   0.55493367
  0.49500000   0.55493367
  0.49500000   0.55493368
  0.49500000   0.55493369
  0.49500000   0.55493369
  0.49500000   0.55493370
  0.49500000   0.55493371
  0.49500000   0.55493371
  0.49500000   0.55493372
  0.49500000   0.55493373
  0.49500000   0.55493373
  0.49500000   0.55493374
  0.49500000   0.55493375
  0.49500000   0.55493375
  0.49500000   0.55493376
  0.49500000   0.55493376
  0.49500000   0.55493377
  0.49500000   0.55493378
  0.49500000   0.55493378
  0.49500000   0.55493379
  0.49500000   0.55493380
  0.49500000   0.55493380
  0.49500000   0.55493381
  0.49500000   0.55493381
  0.49500000   0.55493382
  0.49500000   0.55493383
  0.49500000   0.55493383
  0.49500000   0.55493384
  0.49500000   0.55493384
  0.49500000   0.55493385
  0.49500000   0.55493386
  0.49500000   0.55493386
  0.49500000   0.55493387
  0.49600000   0.55536466
  0.49600000   0.55536466
  0.49600000   0.55536467
  0.49600000   0.55536468
  0.49600000   0.55536468
  0.49600000   0.55536469
  0.49600000   0.55536470
  0.49600000   0.55536470
  0.49600000   0.55536471
  0.49600000   0.55536472
  0.49600000   0.55536472
  0.49600000   0.55536473
  0.49600000   0.55536474
  0.49600000   0.55536474
  0.49600000   0.55536475
  0.49600000   0.55536476
  0.49600000   0.55536476
  0.49600000   0.55536477
  0.49600000   0.55536477
  0.49600000   0.55536478
  0.49600000   0.55536479
  0.49600000   0.55536479
  0.49600000   0.55536480
  0.49600000   0.55536481
  0.49600000   0.55536481
  0.49600000   0.55536482
  0.49600000   0.55536482
  0.49600000   0.55536483
  0.49600000   0.55536484
  0.49600000   0.55536484
  0.49600000   0.55536485
  0.49600000   0.55536486
  0.49600000   0.55536486
  0.49600000   0.55536487
  0.49600000   0.55536487
  0.49600000   0.55536488
  0.49600000   0.55536489
  0.49600000   0.55536489
  0.49600000   0.55536490
  0.49600000   0.55536491
  0.49700000   0.55579476
  0.49700000   0.55579477
  0.49700000   0.55579478
  0.49700000   0.55579478
  0.49700000   0.55579479
  0.49700000   0.55579480
  0.49700000   0.55579480
  0.49700000   0.55579481
  0.49700000   0.55579482
  0.49700000   0.55579482
  0.49700000   0.55579483
  0.49700000   0.55579484
  0.49700000   0.55579484
  0.49700000   0.55579485
  0.49700000   0.55579486
  0.49700000   0.55579486
  0.49700000   0.55579487
  0.49700000   0.55579487
  0.49700000   0.55579488
  0.49700000   0.55579489
  0.49700000   0.55579489
  0.49700000   0.55579490
  0.49700000   0.55579491
  0.49700000   0.55579491
  0.49700000   0.55579492
  0.49700000   0.55579493
  0.49700000   0.55579493
  0.49700000   0.55579494
  0.49700000   0.55579494
  0.49700000   0.55579495
  0.49700000   0.55579496
  0.49700000   0.55579496
  0.49700000   0.55579497
  0.49700000   0.55579497
  0.49700000   0.55579498
  0.49700000   0.55579499
  0.49700000   0.55579499
  0.49700000   0.55579500
  0.49700000   0.55579501
  0.49700000   0.55579501
  0.49800000   0.55622394
  0.49800000   0.55622395
  0.49800000   0.55622396
  0.49800000   0.55622396
  0.49800000   0.55622397
  0.49800000   0.55622398
  0.49800000   0.55622398
  0.49800000   0.55622399
  0.49800000   0.55622400
  0.49800000   0.55622400
  0.49800000   0.55622401
  0.49800000   0.55622402
  0.49800000   0.55622402
  0.49800000   0.55622403
  0.49800000   0.55622404
  0.49800000   0.55622404
  0.49800000   0.55622405
  0.49800000   0.55622405
  0.49800000   0.55622406
  0.49800000   0.55622407
  0.49800000   0.55622407
  0.49800000   0.55622408
  0.49800000   0.55622409
  0.49800000   0.55622409
  0.49800000   0.55622410
  0.49800000   0.55622411
  0.49800000   0.55622411
  0.49800000   0.55622412
  0.49800000   0.55622412
  0.49800000   0.55622413
  0.49800000   0.55622414
  0.49800000   0.55622414
  0.49800000   0.55622415
  0.49800000   0.55622416
  0.49800000   0.55622416
  0.49800000   0.55622417
  0.49800000   0.55622417
  0.49800000   0.55622418
  0.49800000   0.55622419
  0.49800000   0.55622419
  0.49900000   0.55665220
  0.49900000   0.55665221
  0.49900000   0.55665222
  0.49900000   0.55665222
  0.49900000   0.55665223
  0.49900000   0.55665224
  0.49900000   0.55665224
  0.49900000   0.55665225
  0.49900000   0.55665225
  0.49900000   0.55665226
  0.49900000   0.55665227
  0.49900000   0.55665227
  0.49900000   0.55665228
  0.49900000   0.55665229
  0.49900000   0.55665229
  0.49900000   0.55665230
  0.49900000   0.55665231
  0.49900000   0.55665231
  0.49900000   0.55665232
  0.49900000   0.55665233
  0.49900000   0.55665233
  0.49900000   0.55665234
  0.49900000   0.55665234
  0.49900000   0.55665235
  0.49900000   0.55665236
  0.49900000   0.55665236
  0.49900000   0.55665237
  0.49900000   0.55665238
  0.49900000   0.55665238
  0.49900000   0.55665239
  0.49900000   0.55665239
  0.49900000   0.55665240
  0.49900000   0.55665241
  0.49900000   0.55665241
  0.49900000   0.55665242
  0.49900000   0.55665243
  0.49900000   0.55665243
  0.49900000   0.55665244
  0.49900000   0.55665244
  0.49900000   0.55665245
  0.50000000   0.55707954
  0.50000000   0.55707955
  0.50000000   0.55707955
  0.50000000   0.55707956
  0.50000000   0.55707957
  0.50000000   0.55707957
  0.50000000   0.55707958
  0.50000000   0.55707959
  0.50000000   0.55707959
  0.50000000   0.55707960
  0.50000000   0.55707961
  0.50000000   0.55707961
  0.50000000   0.55707962
  0.50000000   0.55707963
  0.50000000   0.55707963
  0.50000000   0.55707964
  0.50000000   0.55707965
  0.50000000   0.55707965
  0.50000000   0.55707966
  0.50000000   0.55707966
  0.50000000   0.55707967
  0.50000000   0.55707968
  0.50000000   0.55707968
  0.50000000   0.55707969
  0.50000000   0.55707970
  0.50000000   0.55707970
  0.50000000   0.55707971
  0.50000000   0.55707971
  0.50000000   0.55707972
  0.50000000   0.55707973
  0.50000000   0.55707973
  0.50000000   0.55707974
  0.50000000   0.55707975
  0.50000000   0.55707975
  0.50000000   0.55707976
  0.50000000   0.55707976
  0.50000000   0.55707977
  0.50000000   0.55707978
  0.50000000   0.55707978
  0.50000000   0.55707979
  0.50100000   0.55750596
  0.50100000   0.55750597
  0.50100000   0.55750598
  0.50100000   0.55750598
  0.50100000   0.55750599
  0.50100000   0.55750600
  0.50100000   0.55750600
  0.50100000   0.55750601
  0.50100000   0.55750602
  0.50100000   0.55750602
  0.50100000   0.55750603
  0.50100000   0.55750604
  0.50100000   0.55750604
  0.50100000   0.55750605
  0.50100000   0.55750605
  0.50100000   0.55750606
  0.50100000   0.55750607
  0.50100000   0.55750607
  0.50100000   0.55750608
  0.50100000   0.55750609
  0.50100000   0.55750609
  0.50100000   0.55750610
  0.50100000   0.55750611
  0.50100000   0.55750611
  0.50100000   0.55750612
  0.50100000   0.55750612
  0.50100000   0.55750613
  0.50100000   0.55750614
  0.50100000   0.55750614
  0.50100000   0.55750615
  0.50100000   0.55750616
  0.50100000   0.55750616
  0.50100000   0.55750617
  0.50100000   0.55750617
  0.50100000   0.55750618
  0.50100000   0.55750619
  0.50100000   0.55750619
  0.50100000   0.55750620
  0.50100000   0.55750621
  0.50100000   0.55750621
  0.50200000   0.55793147
  0.50200000   0.55793148
  0.50200000   0.55793149
  0.50200000   0.55793149
  0.50200000   0.55793150
  0.50200000   0.55793151
  0.50200000   0.55793151
  0.50200000   0.55793152
  0.50200000   0.55793153
  0.50200000   0.55793153
  0.50200000   0.55793154
  0.50200000   0.55793155
  0.50200000   0.55793155
  0.50200000   0.55793156
  0.50200000   0.55793157
  0.50200000   0.55793157
  0.50200000   0.55793158
  0.50200000   0.55793158
  0.50200000   0.55793159
  0.50200000   0.55793160
  0.50200000   0.55793160
  0.50200000   0.55793161
  0.50200000   0.55793162
  0.50200000   0.55793162
  0.50200000   0.55793163
  0.50200000   0.55793164
  0.50200000   0.55793164
  0.50200000   0.55793165
  0.50200000   0.55793165
  0.50200000   0.55793166
  0.50200000   0.55793167
  0.50200000   0.55793167
  0.50200000   0.55793168
  0.50200000   0.55793169
  0.50200000   0.55793169
  0.50200000   0.55793170
  0.50200000   0.55793170
  0.50200000   0.55793171
  0.50200000   0.55793172
  0.50200000   0.55793172
  0.50300000   0.55835607
  0.50300000   0.55835608
  0.50300000   0.55835609
  0.50300000   0.55835609
  0.50300000   0.55835610
  0.50300000   0.55835611
  0.50300000   0.55835611
  0.50300000   0.55835612
  0.50300000   0.55835613
  0.50300000   0.55835613
  0.50300000   0.55835614
  0.50300000   0.55835615
  0.50300000   0.55835615
  0.50300000   0.55835616
  0.50300000   0.55835617
  0.50300000   0.55835617
  0.50300000   0.55835618
  0.50300000   0.55835619
  0.50300000   0.55835619
  0.50300000   0.55835620
  0.50300000   0.55835620
  0.50300000   0.55835621
  0.50300000   0.55835622
  0.50300000   0.55835622
  0.50300000   0.55835623
  0.50300000   0.55835624
  0.50300000   0.55835624
  0.50300000   0.55835625
  0.50300000   0.55835626
  0.50300000   0.55835626
  0.50300000   0.55835627
  0.50300000   0.55835627
  0.50300000   0.55835628
  0.50300000   0.55835629
  0.50300000   0.55835629
  0.50300000   0.55835630
  0.50300000   0.55835630
  0.50300000   0.55835631
  0.50300000   0.55835632
  0.50300000   0.55835632
  0.50400000   0.55877977
  0.50400000   0.55877978
  0.50400000   0.55877978
  0.50400000   0.55877979
  0.50400000   0.55877980
  0.50400000   0.55877980
  0.50400000   0.55877981
  0.50400000   0.55877982
  0.50400000   0.55877982
  0.50400000   0.55877983
  0.50400000   0.55877984
  0.50400000   0.55877984
  0.50400000   0.55877985
  0.50400000   0.55877985
  0.50400000   0.55877986
  0.50400000   0.55877987
  0.50400000   0.55877987
  0.50400000   0.55877988
  0.50400000   0.55877989
  0.50400000   0.55877989
  0.50400000   0.55877990
  0.50400000   0.55877991
  0.50400000   0.55877991
  0.50400000   0.55877992
  0.50400000   0.55877992
  0.50400000   0.55877993
  0.50400000   0.55877994
  0.50400000   0.55877994
  0.50400000   0.55877995
  0.50400000   0.55877996
  0.50400000   0.55877996
  0.50400000   0.55877997
  0.50400000   0.55877998
  0.50400000   0.55877998
  0.50400000   0.55877999
  0.50400000   0.55877999
  0.50400000   0.55878000
  0.50400000   0.55878001
  0.50400000   0.55878001
  0.50400000   0.55878002
  0.50500000   0.55920256
  0.50500000   0.55920257
  0.50500000   0.55920257
  0.50500000   0.55920258
  0.50500000   0.55920259
  0.50500000   0.55920259
  0.50500000   0.55920260
  0.50500000   0.55920261
  0.50500000   0.55920261
  0.50500000   0.55920262
  0.50500000   0.55920263
  0.50500000   0.55920263
  0.50500000   0.55920264
  0.50500000   0.55920265
  0.50500000   0.55920265
  0.50500000   0.55920266
  0.50500000   0.55920267
  0.50500000   0.55920267
  0.50500000   0.55920268
  0.50500000   0.55920269
  0.50500000   0.55920269
  0.50500000   0.55920270
  0.50500000   0.55920270
  0.50500000   0.55920271
  0.50500000   0.55920272
  0.50500000   0.55920272
  0.50500000   0.55920273
  0.50500000   0.55920274
  0.50500000   0.55920274
  0.50500000   0.55920275
  0.50500000   0.55920275
  0.50500000   0.55920276
  0.50500000   0.55920277
  0.50500000   0.55920277
  0.50500000   0.55920278
  0.50500000   0.55920279
  0.50500000   0.55920279
  0.50500000   0.55920280
  0.50500000   0.55920280
  0.50500000   0.55920281
  0.50600000   0.55962445
  0.50600000   0.55962446
  0.50600000   0.55962447
  0.50600000   0.55962447
  0.50600000   0.55962448
  0.50600000   0.55962449
  0.50600000   0.55962449
  0.50600000   0.55962450
  0.50600000   0.55962451
  0.50600000   0.55962451
  0.50600000   0.55962452
  0.50600000   0.55962453
  0.50600000   0.55962453
  0.50600000   0.55962454
  0.50600000   0.55962455
  0.50600000   0.55962455
  0.50600000   0.55962456
  0.50600000   0.55962457
  0.50600000   0.55962457
  0.50600000   0.55962458
  0.50600000   0.55962458
  0.50600000   0.55962459
  0.50600000   0.55962460
  0.50600000   0.55962460
  0.50600000   0.55962461
  0.50600000   0.55962462
  0.50600000   0.55962462
  0.50600000   0.55962463
  0.50600000   0.55962464
  0.50600000   0.55962464
  0.50600000   0.55962465
  0.50600000   0.55962465
  0.50600000   0.55962466
  0.50600000   0.55962467
  0.50600000   0.55962467
  0.50600000   0.55962468
  0.50600000   0.55962469
  0.50600000   0.55962469
  0.50600000   0.55962470
  0.50600000   0.55962470
  0.50700000   0.56004545
  0.50700000   0.56004546
  0.50700000   0.56004546
  0.50700000   0.56004547
  0.50700000   0.56004548
  0.50700000   0.56004548
  0.50700000   0.56004549
  0.50700000   0.56004550
  0.50700000   0.56004550
  0.50700000   0.56004551
  0.50700000   0.56004552
  0.50700000   0.56004552
  0.50700000   0.56004553
  0.50700000   0.56004554
  0.50700000   0.56004554
  0.50700000   0.56004555
  0.50700000   0.56004556
  0.50700000   0.56004556
  0.50700000   0.56004557
  0.50700000   0.56004557
  0.50700000   0.56004558
  0.50700000   0.56004559
  0.50700000   0.56004559
  0.50700000   0.56004560
  0.50700000   0.56004561
  0.50700000   0.56004561
  0.50700000   0.56004562
  0.50700000   0.56004563
  0.50700000   0.56004563
  0.50700000   0.56004564
  0.50700000   0.56004564
  0.50700000   0.56004565
  0.50700000   0.56004566
  0.50700000   0.56004566
  0.50700000   0.56004567
  0.50700000   0.56004568
  0.50700000   0.56004568
  0.50700000   0.56004569
  0.50700000   0.56004569
  0.50700000   0.56004570
  0.50800000   0.56046555
  0.50800000   0.56046556
  0.50800000   0.56046557
  0.50800000   0.56046557
  0.50800000   0.56046558
  0.50800000   0.56046559
  0.50800000   0.56046559
  0.50800000   0.56046560
  0.50800000   0.56046561
  0.50800000   0.56046561
  0.50800000   0.56046562
  0.50800000   0.56046563
  0.50800000   0.56046563
  0.50800000   0.56046564
  0.50800000   0.56046565
  0.50800000   0.56046565
  0.50800000   0.56046566
  0.50800000   0.56046567
  0.50800000   0.56046567
  0.50800000   0.56046568
  0.50800000   0.56046568
  0.50800000   0.56046569
  0.50800000   0.56046570
  0.50800000   0.56046570
  0.50800000   0.56046571
  0.50800000   0.56046572
  0.50800000   0.56046572
  0.50800000   0.56046573
  0.50800000   0.56046574
  0.50800000   0.56046574
  0.50800000   0.56046575
  0.50800000   0.56046575
  0.50800000   0.56046576
  0.50800000   0.56046577
  0.50800000   0.56046577
  0.50800000   0.56046578
  0.50800000   0.56046579
  0.50800000   0.56046579
  0.50800000   0.56046580
  0.50800000   0.56046580
  0.50900000   0.56088477
  0.50900000   0.56088477
  0.50900000   0.56088478
  0.50900000   0.56088479
  0.50900000   0.56088479
  0.50900000   0.56088480
  0.50900000   0.56088481
  0.50900000   0.56088481
  0.50900000   0.56088482
  0.50900000   0.56088483
  0.50900000   0.56088483
  0.50900000   0.56088484
  0.50900000   0.56088485
  0.50900000   0.56088485
  0.50900000   0.56088486
  0.50900000   0.56088487
  0.50900000   0.56088487
  0.50900000   0.56088488
  0.50900000   0.56088489
  0.50900000   0.56088489
  0.50900000   0.56088490
  0.50900000   0.56088490
  0.50900000   0.56088491
  0.50900000   0.56088492
  0.50900000   0.56088492
  0.50900000   0.56088493
  0.50900000   0.56088494
  0.50900000   0.56088494
  0.50900000   0.56088495
  0.50900000   0.56088496
  0.50900000   0.56088496
  0.50900000   0.56088497
  0.50900000   0.56088497
  0.50900000   0.56088498
  0.50900000   0.56088499
  0.50900000   0.56088499
  0.50900000   0.56088500
  0.50900000   0.56088501
  0.50900000   0.56088501
  0.50900000   0.56088502
  0.51000000   0.56130309
  0.51000000   0.56130310
  0.51000000   0.56130311
  0.51000000   0.56130311
  0.51000000   0.56130312
  0.51000000   0.56130313
  0.51000000   0.56130313
  0.51000000   0.56130314
  0.51000000   0.56130315
  0.51000000   0.56130315
  0.51000000   0.56130316
  0.51000000   0.56130317
  0.51000000   0.56130317
  0.51000000   0.56130318
  0.51000000   0.56130319
  0.51000000   0.56130319
  0.51000000   0.56130320
  0.51000000   0.56130321
  0.51000000   0.56130321
  0.51000000   0.56130322
  0.51000000   0.56130323
  0.51000000   0.56130323
  0.51000000   0.56130324
  0.51000000   0.56130324
  0.51000000   0.56130325
  0.51000000   0.56130326
  0.51000000   0.56130326
  0.51000000   0.56130327
  0.51000000   0.56130328
  0.51000000   0.56130328
  0.51000000   0.56130329
  0.51000000   0.56130329
  0.51000000   0.56130330
  0.51000000   0.56130331
  0.51000000   0.56130331
  0.51000000   0.56130332
  0.51000000   0.56130333
  0.51000000   0.56130333
  0.51000000   0.56130334
  0.51000000   0.56130334
  0.51100000   0.56172054
  0.51100000   0.56172054
  0.51100000   0.56172055
  0.51100000   0.56172056
  0.51100000   0.56172056
  0.51100000   0.56172057
  0.51100000   0.56172058
  0.51100000   0.56172058
  0.51100000   0.56172059
  0.51100000   0.56172060
  0.51100000   0.56172060
  0.51100000   0.56172061
  0.51100000   0.56172062
  0.51100000   0.56172062
  0.51100000   0.56172063
  0.51100000   0.56172064
  0.51100000   0.56172064
  0.51100000   0.56172065
  0.51100000   0.56172066
  0.51100000   0.56172066
  0.51100000   0.56172067
  0.51100000   0.56172067
  0.51100000   0.56172068
  0.51100000   0.56172069
  0.51100000   0.56172069
  0.51100000   0.56172070
  0.51100000   0.56172071
  0.51100000   0.56172071
  0.51100000   0.56172072
  0.51100000   0.56172073
  0.51100000   0.56172073
  0.51100000   0.56172074
  0.51100000   0.56172074
  0.51100000   0.56172075
  0.51100000   0.56172076
  0.51100000   0.56172076
  0.51100000   0.56172077
  0.51100000   0.56172078
  0.51100000   0.56172078
  0.51100000   0.56172079
  0.51200000   0.56213710
  0.51200000   0.56213711
  0.51200000   0.56213711
  0.51200000   0.56213712
  0.51200000   0.56213713
  0.51200000   0.56213713
  0.51200000   0.56213714
  0.51200000   0.56213715
  0.51200000   0.56213715
  0.51200000   0.56213716
  0.51200000   0.56213717
  0.51200000   0.56213717
  0.51200000   0.56213718
  0.51200000   0.56213719
  0.51200000   0.56213719
  0.51200000   0.56213720
  0.51200000   0.56213721
  0.51200000   0.56213721
  0.51200000   0.56213722
  0.51200000   0.56213723
  0.51200000   0.56213723
  0.51200000   0.56213724
  0.51200000   0.56213724
  0.51200000   0.56213725
  0.51200000   0.56213726
  0.51200000   0.56213726
  0.51200000   0.56213727
  0.51200000   0.56213728
  0.51200000   0.56213728
  0.51200000   0.56213729
  0.51200000   0.56213730
  0.51200000   0.56213730
  0.51200000   0.56213731
  0.51200000   0.56213731
  0.51200000   0.56213732
  0.51200000   0.56213733
  0.51200000   0.56213733
  0.51200000   0.56213734
  0.51200000   0.56213735
  0.51200000   0.56213735
  0.51300000   0.56255279
  0.51300000   0.56255279
  0.51300000   0.56255280
  0.51300000   0.56255281
  0.51300000   0.56255281
  0.51300000   0.56255282
  0.51300000   0.56255283
  0.51300000   0.56255283
  0.51300000   0.56255284
  0.51300000   0.56255285
  0.51300000   0.56255285
  0.51300000   0.56255286
  0.51300000   0.56255287
  0.51300000   0.56255287
  0.51300000   0.56255288
  0.51300000   0.56255289
  0.51300000   0.56255289
  0.51300000   0.56255290
  0.51300000   0.56255290
  0.51300000   0.56255291
  0.51300000   0.56255292
  0.51300000   0.56255292
  0.51300000   0.56255293
  0.51300000   0.56255294
  0.51300000   0.56255294
  0.51300000   0.56255295
  0.51300000   0.56255296
  0.51300000   0.56255296
  0.51300000   0.56255297
  0.51300000   0.56255297
  0.51300000   0.56255298
  0.51300000   0.56255299
  0.51300000   0.56255299
  0.51300000   0.56255300
  0.51300000   0.56255301
  0.51300000   0.56255301
  0.51300000   0.56255302
  0.51300000   0.56255302
  0.51300000   0.56255303
  0.51300000   0.56255304
  0.51400000   0.56296760
  0.51400000   0.56296760
  0.51400000   0.56296761
  0.51400000   0.56296762
  0.51400000   0.56296762
  0.51400000   0.56296763
  0.51400000   0.56296764
  0.51400000   0.56296764
  0.51400000   0.56296765
  0.51400000   0.56296766
  0.51400000   0.56296766
  0.51400000   0.56296767
  0.51400000   0.56296768
  0.51400000   0.56296768
  0.51400000   0.56296769
  0.51400000   0.56296770
  0.51400000   0.56296770
  0.51400000   0.56296771
  0.51400000   0.56296772
  0.51400000   0.56296772
  0.51400000   0.56296773
  0.51400000   0.56296774
  0.51400000   0.56296774
  0.51400000   0.56296775
  0.51400000   0.56296775
  0.51400000   0.56296776
  0.51400000   0.56296777
  0.51400000   0.56296777
  0.51400000   0.56296778
  0.51400000   0.56296779
  0.51400000   0.56296779
  0.51400000   0.56296780
  0.51400000   0.56296781
  0.51400000   0.56296781
  0.51400000   0.56296782
  0.51400000   0.56296782
  0.51400000   0.56296783
  0.51400000   0.56296784
  0.51400000   0.56296784
  0.51400000   0.56296785
  0.51500000   0.56338154
  0.51500000   0.56338155
  0.51500000   0.56338155
  0.51500000   0.56338156
  0.51500000   0.56338157
  0.51500000   0.56338157
  0.51500000   0.56338158
  0.51500000   0.56338158
  0.51500000   0.56338159
  0.51500000   0.56338160
  0.51500000   0.56338160
  0.51500000   0.56338161
  0.51500000   0.56338162
  0.51500000   0.56338162
  0.51500000   0.56338163
  0.51500000   0.56338164
  0.51500000   0.56338164
  0.51500000   0.56338165
  0.51500000   0.56338166
  0.51500000   0.56338166
  0.51500000   0.56338167
  0.51500000   0.56338168
  0.51500000   0.56338168
  0.51500000   0.56338169
  0.51500000   0.56338170
  0.51500000   0.56338170
  0.51500000   0.56338171
  0.51500000   0.56338171
  0.51500000   0.56338172
  0.51500000   0.56338173
  0.51500000   0.56338173
  0.51500000   0.56338174
  0.51500000   0.56338175
  0.51500000   0.56338175
  0.51500000   0.56338176
  0.51500000   0.56338176
  0.51500000   0.56338177
  0.51500000   0.56338178
  0.51500000   0.56338178
  0.51500000   0.56338179
  0.51600000   0.56379461
  0.51600000   0.56379462
  0.51600000   0.56379462
  0.51600000   0.56379463
  0.51600000   0.56379464
  0.51600000   0.56379464
  0.51600000   0.56379465
  0.51600000   0.56379466
  0.51600000   0.56379466
  0.51600000   0.56379467
  0.51600000   0.56379468
  0.51600000   0.56379468
  0.51600000   0.56379469
  0.51600000   0.56379470
  0.51600000   0.56379470
  0.51600000   0.56379471
  0.51600000   0.56379472
  0.51600000   0.56379472
  0.51600000   0.56379473
  0.51600000   0.56379474
  0.51600000   0.56379474
  0.51600000   0.56379475
  0.51600000   0.56379476
  0.51600000   0.56379476
  0.51600000   0.56379477
  0.51600000   0.56379477
  0.51600000   0.56379478
  0.51600000   0.56379479
  0.51600000   0.56379479
  0.51600000   0.56379480
  0.51600000   0.56379481
  0.51600000   0.56379481
  0.51600000   0.56379482
  0.51600000   0.56379482
  0.51600000   0.56379483
  0.51600000   0.56379484
  0.51600000   0.56379484
  0.51600000   0.56379485
  0.51600000   0.56379486
  0.51600000   0.56379486
  0.51700000   0.56420682
  0.51700000   0.56420683
  0.51700000   0.56420683
  0.51700000   0.56420684
  0.51700000   0.56420685
  0.51700000   0.56420685
  0.51700000   0.56420686
  0.51700000   0.56420687
  0.51700000   0.56420687
  0.51700000   0.56420688
  0.51700000   0.56420688
  0.51700000   0.56420689
  0.51700000   0.56420690
  0.51700000   0.56420690
  0.51700000   0.56420691
  0.51700000   0.56420692
  0.51700000   0.56420692
  0.51700000   0.56420693
  0.51700000   0.56420694
  0.51700000   0.56420694
  0.51700000   0.56420695
  0.51700000   0.56420696
  0.51700000   0.56420696
  0.51700000   0.56420697
  0.51700000   0.56420698
  0.51700000   0.56420698
  0.51700000   0.56420699
  0.51700000   0.56420699
  0.51700000   0.56420700
  0.51700000   0.56420701
  0.51700000   0.56420701
  0.51700000   0.56420702
  0.51700000   0.56420703
  0.51700000   0.56420703
  0.51700000   0.56420704
  0.51700000   0.56420705
  0.51700000   0.56420705
  0.51700000   0.56420706
  0.51700000   0.56420706
  0.51700000   0.56420707
  0.51800000   0.56461816
  0.51800000   0.56461817
  0.51800000   0.56461818
  0.51800000   0.56461818
  0.51800000   0.56461819
  0.51800000   0.56461820
  0.51800000   0.56461820
  0.51800000   0.56461821
  0.51800000   0.56461822
  0.51800000   0.56461822
  0.51800000   0.56461823
  0.51800000   0.56461824
  0.51800000   0.56461824
  0.51800000   0.56461825
  0.51800000   0.56461826
  0.51800000   0.56461826
  0.51800000   0.56461827
  0.51800000   0.56461828
  0.51800000   0.56461828
  0.51800000   0.56461829
  0.51800000   0.56461830
  0.51800000   0.56461830
  0.51800000   0.56461831
  0.51800000   0.56461831
  0.51800000   0.56461832
  0.51800000   0.56461833
  0.51800000   0.56461833
  0.51800000   0.56461834
  0.51800000   0.56461835
  0.51800000   0.56461835
  0.51800000   0.56461836
  0.51800000   0.56461837
  0.51800000   0.56461837
  0.51800000   0.56461838
  0.51800000   0.56461838
  0.51800000   0.56461839
  0.51800000   0.56461840
  0.51800000   0.56461840
  0.51800000   0.56461841
  0.51800000   0.56461842
  0.51900000   0.56502865
  0.51900000   0.56502866
  0.51900000   0.56502866
  0.51900000   0.56502867
  0.51900000   0.56502868
  0.51900000   0.56502868
  0.51900000   0.56502869
  0.51900000   0.56502870
  0.51900000   0.56502870
  0.51900000   0.56502871
  0.51900000   0.56502872
  0.51900000   0.56502872
  0.51900000   0.56502873
  0.51900000   0.56502874
  0.51900000   0.56502874
  0.51900000   0.56502875
  0.51900000   0.56502876
  0.51900000   0.56502876
  0.51900000   0.56502877
  0.51900000   0.56502878
  0.51900000   0.56502878
  0.51900000   0.56502879
  0.51900000   0.56502880
  0.51900000   0.56502880
  0.51900000   0.56502881
  0.51900000   0.56502881
  0.51900000   0.56502882
  0.51900000   0.56502883
  0.51900000   0.56502883
  0.51900000   0.56502884
  0.51900000   0.56502885
  0.51900000   0.56502885
  0.51900000   0.56502886
  0.51900000   0.56502887
  0.51900000   0.56502887
  0.51900000   0.56502888
  0.51900000   0.56502888
  0.51900000   0.56502889
  0.51900000   0.56502890
  0.51900000   0.56502890
  0.52000000   0.56543828
  0.52000000   0.56543829
  0.52000000   0.56543830
  0.52000000   0.56543830
  0.52000000   0.56543831
  0.52000000   0.56543832
  0.52000000   0.56543832
  0.52000000   0.56543833
  0.52000000   0.56543834
  0.52000000   0.56543834
  0.52000000   0.56543835
  0.52000000   0.56543836
  0.52000000   0.56543836
  0.52000000   0.56543837
  0.52000000   0.56543837
  0.52000000   0.56543838
  0.52000000   0.56543839
  0.52000000   0.56543839
  0.52000000   0.56543840
  0.52000000   0.56543841
  0.52000000   0.56543841
  0.52000000   0.56543842
  0.52000000   0.56543843
  0.52000000   0.56543843
  0.52000000   0.56543844
  0.52000000   0.56543845
  0.52000000   0.56543845
  0.52000000   0.56543846
  0.52000000   0.56543846
  0.52000000   0.56543847
  0.52000000   0.56543848
  0.52000000   0.56543848
  0.52000000   0.56543849
  0.52000000   0.56543850
  0.52000000   0.56543850
  0.52000000   0.56543851
  0.52000000   0.56543852
  0.52000000   0.56543852
  0.52000000   0.56543853
  0.52000000   0.56543853
  0.52100000   0.56584706
  0.52100000   0.56584707
  0.52100000   0.56584707
  0.52100000   0.56584708
  0.52100000   0.56584709
  0.52100000   0.56584709
  0.52100000   0.56584710
  0.52100000   0.56584711
  0.52100000   0.56584711
  0.52100000   0.56584712
  0.52100000   0.56584713
  0.52100000   0.56584713
  0.52100000   0.56584714
  0.52100000   0.56584715
  0.52100000   0.56584715
  0.52100000   0.56584716
  0.52100000   0.56584717
  0.52100000   0.56584717
  0.52100000   0.56584718
  0.52100000   0.56584719
  0.52100000   0.56584719
  0.52100000   0.56584720
  0.52100000   0.56584720
  0.52100000   0.56584721
  0.52100000   0.56584722
  0.52100000   0.56584722
  0.52100000   0.56584723
  0.52100000   0.56584724
  0.52100000   0.56584724
  0.52100000   0.56584725
  0.52100000   0.56584726
  0.52100000   0.56584726
  0.52100000   0.56584727
  0.52100000   0.56584727
  0.52100000   0.56584728
  0.52100000   0.56584729
  0.52100000   0.56584729
  0.52100000   0.56584730
  0.52100000   0.56584731
  0.52100000   0.56584731
  0.52200000   0.56625499
  0.52200000   0.56625500
  0.52200000   0.56625500
  0.52200000   0.56625501
  0.52200000   0.56625502
  0.52200000   0.56625502
  0.52200000   0.56625503
  0.52200000   0.56625504
  0.52200000   0.56625504
  0.52200000   0.56625505
  0.52200000   0.56625506
  0.52200000   0.56625506
  0.52200000   0.56625507
  0.52200000   0.56625507
  0.52200000   0.56625508
  0.52200000   0.56625509
  0.52200000   0.56625509
  0.52200000   0.56625510
  0.52200000   0.56625511
  0.52200000   0.56625511
  0.52200000   0.56625512
  0.52200000   0.56625513
  0.52200000   0.56625513
  0.52200000   0.56625514
  0.52200000   0.56625515
  0.52200000   0.56625515
  0.52200000   0.56625516
  0.52200000   0.56625517
  0.52200000   0.56625517
  0.52200000   0.56625518
  0.52200000   0.56625518
  0.52200000   0.56625519
  0.52200000   0.56625520
  0.52200000   0.56625520
  0.52200000   0.56625521
  0.52200000   0.56625522
  0.52200000   0.56625522
  0.52200000   0.56625523
  0.52200000   0.56625523
  0.52200000   0.56625524
  0.52300000   0.56666207
  0.52300000   0.56666208
  0.52300000   0.56666208
  0.52300000   0.56666209
  0.52300000   0.56666210
  0.52300000   0.56666210
  0.52300000   0.56666211
  0.52300000   0.56666212
  0.52300000   0.56666212
  0.52300000   0.56666213
  0.52300000   0.56666214
  0.52300000   0.56666214
  0.52300000   0.56666215
  0.52300000   0.56666216
  0.52300000   0.56666216
  0.52300000   0.56666217
  0.52300000   0.56666218
  0.52300000   0.56666218
  0.52300000   0.56666219
  0.52300000   0.56666220
  0.52300000   0.56666220
  0.52300000   0.56666221
  0.52300000   0.56666221
  0.52300000   0.56666222
  0.52300000   0.56666223
  0.52300000   0.56666223
  0.52300000   0.56666224
  0.52300000   0.56666225
  0.52300000   0.56666225
  0.52300000   0.56666226
  0.52300000   0.56666227
  0.52300000   0.56666227
  0.52300000   0.56666228
  0.52300000   0.56666228
  0.52300000   0.56666229
  0.52300000   0.56666230
  0.52300000   0.56666230
  0.52300000   0.56666231
  0.52300000   0.56666232
  0.52300000   0.56666232
  0.52400000   0.56706831
  0.52400000   0.56706831
  0.52400000   0.56706832
  0.52400000   0.56706833
  0.52400000   0.56706833
  0.52400000   0.56706834
  0.52400000   0.56706835
  0.52400000   0.56706835
  0.52400000   0.56706836
  0.52400000   0.56706837
  0.52400000   0.56706837
  0.52400000   0.56706838
  0.52400000   0.56706839
  0.52400000   0.56706839
  0.52400000   0.56706840
  0.52400000   0.56706841
  0.52400000   0.56706841
  0.52400000   0.56706842
  0.52400000   0.56706843
  0.52400000   0.56706843
  0.52400000   0.56706844
  0.52400000   0.56706845
  0.52400000   0.56706845
  0.52400000   0.56706846
  0.52400000   0.56706847
  0.52400000   0.56706847
  0.52400000   0.56706848
  0.52400000   0.56706848
  0.52400000   0.56706849
  0.52400000   0.56706850
  0.52400000   0.56706850
  0.52400000   0.56706851
  0.52400000   0.56706852
  0.52400000   0.56706852
  0.52400000   0.56706853
  0.52400000   0.56706853
  0.52400000   0.56706854
  0.52400000   0.56706855
  0.52400000   0.56706855
  0.52400000   0.56706856
  0.52500000   0.56747370
  0.52500000   0.56747371
  0.52500000   0.56747372
  0.52500000   0.56747372
  0.52500000   0.56747373
  0.52500000   0.56747374
  0.52500000   0.56747374
  0.52500000   0.56747375
  0.52500000   0.56747376
  0.52500000   0.56747376
  0.52500000   0.56747377
  0.52500000   0.56747378
  0.52500000   0.56747378
  0.52500000   0.56747379
  0.52500000   0.56747380
  0.52500000   0.56747380
  0.52500000   0.56747381
  0.52500000   0.56747382
  0.52500000   0.56747382
  0.52500000   0.56747383
  0.52500000   0.56747384
  0.52500000   0.56747384
  0.52500000   0.56747385
  0.52500000   0.56747386
  0.52500000   0.56747386
  0.52500000   0.56747387
  0.52500000   0.56747387
  0.52500000   0.56747388
  0.52500000   0.56747389
  0.52500000   0.56747389
  0.52500000   0.56747390
  0.52500000   0.56747391
  0.52500000   0.56747391
  0.52500000   0.56747392
  0.52500000   0.56747393
  0.52500000   0.56747393
  0.52500000   0.56747394
  0.52500000   0.56747394
  0.52500000   0.56747395
  0.52500000   0.56747396
  0.52600000   0.56787826
  0.52600000   0.56787827
  0.52600000   0.56787828
  0.52600000   0.56787828
  0.52600000   0.56787829
  0.52600000   0.56787830
  0.52600000   0.56787830
  0.52600000   0.56787831
  0.52600000   0.56787832
  0.52600000   0.56787832
  0.52600000   0.56787833
  0.52600000   0.56787834
  0.52600000   0.56787834
  0.52600000   0.56787835
  0.52600000   0.56787836
  0.52600000   0.56787836
  0.52600000   0.56787837
  0.52600000   0.56787837
  0.52600000   0.56787838
  0.52600000   0.56787839
  0.52600000   0.56787839
  0.52600000   0.56787840
  0.52600000   0.56787841
  0.52600000   0.56787841
  0.52600000   0.56787842
  0.52600000   0.56787843
  0.52600000   0.56787843
  0.52600000   0.56787844
  0.52600000   0.56787845
  0.52600000   0.56787845
  0.52600000   0.56787846
  0.52600000   0.56787846
  0.52600000   0.56787847
  0.52600000   0.56787848
  0.52600000   0.56787848
  0.52600000   0.56787849
  0.52600000   0.56787850
  0.52600000   0.56787850
  0.52600000   0.56787851
  0.52600000   0.56787852
  0.52700000   0.56828198
  0.52700000   0.56828199
  0.52700000   0.56828200
  0.52700000   0.56828201
  0.52700000   0.56828201
  0.52700000   0.56828202
  0.52700000   0.56828203
  0.52700000   0.56828203
  0.52700000   0.56828204
  0.52700000   0.56828205
  0.52700000   0.56828205
  0.52700000   0.56828206
  0.52700000   0.56828207
  0.52700000   0.56828207
  0.52700000   0.56828208
  0.52700000   0.56828208
  0.52700000   0.56828209
  0.52700000   0.56828210
  0.52700000   0.56828210
  0.52700000   0.56828211
  0.52700000   0.56828212
  0.52700000   0.56828212
  0.52700000   0.56828213
  0.52700000   0.56828214
  0.52700000   0.56828214
  0.52700000   0.56828215
  0.52700000   0.56828216
  0.52700000   0.56828216
  0.52700000   0.56828217
  0.52700000   0.56828218
  0.52700000   0.56828218
  0.52700000   0.56828219
  0.52700000   0.56828219
  0.52700000   0.56828220
  0.52700000   0.56828221
  0.52700000   0.56828221
  0.52700000   0.56828222
  0.52700000   0.56828223
  0.52700000   0.56828223
  0.52700000   0.56828224
  0.52800000   0.56868488
  0.52800000   0.56868488
  0.52800000   0.56868489
  0.52800000   0.56868490
  0.52800000   0.56868490
  0.52800000   0.56868491
  0.52800000   0.56868492
  0.52800000   0.56868492
  0.52800000   0.56868493
  0.52800000   0.56868494
  0.52800000   0.56868494
  0.52800000   0.56868495
  0.52800000   0.56868496
  0.52800000   0.56868496
  0.52800000   0.56868497
  0.52800000   0.56868498
  0.52800000   0.56868498
  0.52800000   0.56868499
  0.52800000   0.56868500
  0.52800000   0.56868500
  0.52800000   0.56868501
  0.52800000   0.56868501
  0.52800000   0.56868502
  0.52800000   0.56868503
  0.52800000   0.56868503
  0.52800000   0.56868504
  0.52800000   0.56868505
  0.52800000   0.56868505
  0.52800000   0.56868506
  0.52800000   0.56868507
  0.52800000   0.56868507
  0.52800000   0.56868508
  0.52800000   0.56868509
  0.52800000   0.56868509
  0.52800000   0.56868510
  0.52800000   0.56868510
  0.52800000   0.56868511
  0.52800000   0.56868512
  0.52800000   0.56868512
  0.52800000   0.56868513
  0.52900000   0.56908694
  0.52900000   0.56908694
  0.52900000   0.56908695
  0.52900000   0.56908696
  0.52900000   0.56908696
  0.52900000   0.56908697
  0.52900000   0.56908698
  0.52900000   0.56908698
  0.52900000   0.56908699
  0.52900000   0.56908700
  0.52900000   0.56908700
  0.52900000   0.56908701
  0.52900000   0.56908702
  0.52900000   0.56908702
  0.52900000   0.56908703
  0.52900000   0.56908704
  0.52900000   0.56908704
  0.52900000   0.56908705
  0.52900000   0.56908706
  0.52900000   0.56908706
  0.52900000   0.56908707
  0.52900000   0.56908708
  0.52900000   0.56908708
  0.52900000   0.56908709
  0.52900000   0.56908710
  0.52900000   0.56908710
  0.52900000   0.56908711
  0.52900000   0.56908711
  0.52900000   0.56908712
  0.52900000   0.56908713
  0.52900000   0.56908713
  0.52900000   0.56908714
  0.52900000   0.56908715
  0.52900000   0.56908715
  0.52900000   0.56908716
  0.52900000   0.56908717
  0.52900000   0.56908717
  0.52900000   0.56908718
  0.52900000   0.56908718
  0.52900000   0.56908719
  0.53000000   0.56948817
  0.53000000   0.56948818
  0.53000000   0.56948819
  0.53000000   0.56948819
  0.53000000   0.56948820
  0.53000000   0.56948821
  0.53000000   0.56948821
  0.53000000   0.56948822
  0.53000000   0.56948823
  0.53000000   0.56948823
  0.53000000   0.56948824
  0.53000000   0.56948825
  0.53000000   0.56948825
  0.53000000   0.56948826
  0.53000000   0.56948827
  0.53000000   0.56948827
  0.53000000   0.56948828
  0.53000000   0.56948829
  0.53000000   0.56948829
  0.53000000   0.56948830
  0.53000000   0.56948830
  0.53000000   0.56948831
  0.53000000   0.56948832
  0.53000000   0.56948832
  0.53000000   0.56948833
  0.53000000   0.56948834
  0.53000000   0.56948834
  0.53000000   0.56948835
  0.53000000   0.56948836
  0.53000000   0.56948836
  0.53000000   0.56948837
  0.53000000   0.56948838
  0.53000000   0.56948838
  0.53000000   0.56948839
  0.53000000   0.56948839
  0.53000000   0.56948840
  0.53000000   0.56948841
  0.53000000   0.56948841
  0.53000000   0.56948842
  0.53000000   0.56948843
  0.53100000   0.56988858
  0.53100000   0.56988859
  0.53100000   0.56988860
  0.53100000   0.56988860
  0.53100000   0.56988861
  0.53100000   0.56988862
  0.53100000   0.56988862
  0.53100000   0.56988863
  0.53100000   0.56988864
  0.53100000   0.56988864
  0.53100000   0.56988865
  0.53100000   0.56988866
  0.53100000   0.56988866
  0.53100000   0.56988867
  0.53100000   0.56988868
  0.53100000   0.56988868
  0.53100000   0.56988869
  0.53100000   0.56988870
  0.53100000   0.56988870
  0.53100000   0.56988871
  0.53100000   0.56988872
  0.53100000   0.56988872
  0.53100000   0.56988873
  0.53100000   0.56988874
  0.53100000   0.56988874
  0.53100000   0.56988875
  0.53100000   0.56988875
  0.53100000   0.56988876
  0.53100000   0.56988877
  0.53100000   0.56988877
  0.53100000   0.56988878
  0.53100000   0.56988879
  0.53100000   0.56988879
  0.53100000   0.56988880
  0.53100000   0.56988881
  0.53100000   0.56988881
  0.53100000   0.56988882
  0.53100000   0.56988882
  0.53100000   0.56988883
  0.53100000   0.56988884
  0.53200000   0.57028817
  0.53200000   0.57028818
  0.53200000   0.57028819
  0.53200000   0.57028819
  0.53200000   0.57028820
  0.53200000   0.57028821
  0.53200000   0.57028821
  0.53200000   0.57028822
  0.53200000   0.57028823
  0.53200000   0.57028823
  0.53200000   0.57028824
  0.53200000   0.57028825
  0.53200000   0.57028825
  0.53200000   0.57028826
  0.53200000   0.57028827
  0.53200000   0.57028827
  0.53200000   0.57028828
  0.53200000   0.57028829
  0.53200000   0.57028829
  0.53200000   0.57028830
  0.53200000   0.57028831
  0.53200000   0.57028831
  0.53200000   0.57028832
  0.53200000   0.57028833
  0.53200000   0.57028833
  0.53200000   0.57028834
  0.53200000   0.57028834
  0.53200000   0.57028835
  0.53200000   0.57028836
  0.53200000   0.57028836
  0.53200000   0.57028837
  0.53200000   0.57028838
  0.53200000   0.57028838
  0.53200000   0.57028839
  0.53200000   0.57028840
  0.53200000   0.57028840
  0.53200000   0.57028841
  0.53200000   0.57028841
  0.53200000   0.57028842
  0.53200000   0.57028843
  0.53300000   0.57068695
  0.53300000   0.57068695
  0.53300000   0.57068696
  0.53300000   0.57068697
  0.53300000   0.57068697
  0.53300000   0.57068698
  0.53300000   0.57068699
  0.53300000   0.57068699
  0.53300000   0.57068700
  0.53300000   0.57068701
  0.53300000   0.57068701
  0.53300000   0.57068702
  0.53300000   0.57068703
  0.53300000   0.57068703
  0.53300000   0.57068704
  0.53300000   0.57068705
  0.53300000   0.57068705
  0.53300000   0.57068706
  0.53300000   0.57068707
  0.53300000   0.57068707
  0.53300000   0.57068708
  0.53300000   0.57068708
  0.53300000   0.57068709
  0.53300000   0.57068710
  0.53300000   0.57068710
  0.53300000   0.57068711
  0.53300000   0.57068712
  0.53300000   0.57068712
  0.53300000   0.57068713
  0.53300000   0.57068714
  0.53300000   0.57068714
  0.53300000   0.57068715
  0.53300000   0.57068716
  0.53300000   0.57068716
  0.53300000   0.57068717
  0.53300000   0.57068717
  0.53300000   0.57068718
  0.53300000   0.57068719
  0.53300000   0.57068719
  0.53300000   0.57068720
  0.53400000   0.57108490
  0.53400000   0.57108491
  0.53400000   0.57108492
  0.53400000   0.57108492
  0.53400000   0.57108493
  0.53400000   0.57108494
  0.53400000   0.57108494
  0.53400000   0.57108495
  0.53400000   0.57108496
  0.53400000   0.57108496
  0.53400000   0.57108497
  0.53400000   0.57108498
  0.53400000   0.57108498
  0.53400000   0.57108499
  0.53400000   0.57108500
  0.53400000   0.57108500
  0.53400000   0.57108501
  0.53400000   0.57108502
  0.53400000   0.57108502
  0.53400000   0.57108503
  0.53400000   0.57108504
  0.53400000   0.57108504
  0.53400000   0.57108505
  0.53400000   0.57108505
  0.53400000   0.57108506
  0.53400000   0.57108507
  0.53400000   0.57108507
  0.53400000   0.57108508
  0.53400000   0.57108509
  0.53400000   0.57108509
  0.53400000   0.57108510
  0.53400000   0.57108511
  0.53400000   0.57108511
  0.53400000   0.57108512
  0.53400000   0.57108513
  0.53400000   0.57108513
  0.53400000   0.57108514
  0.53400000   0.57108514
  0.53400000   0.57108515
  0.53400000   0.57108516
  0.53500000   0.57148205
  0.53500000   0.57148205
  0.53500000   0.57148206
  0.53500000   0.57148207
  0.53500000   0.57148207
  0.53500000   0.57148208
  0.53500000   0.57148209
  0.53500000   0.57148209
  0.53500000   0.57148210
  0.53500000   0.57148211
  0.53500000   0.57148211
  0.53500000   0.57148212
  0.53500000   0.57148213
  0.53500000   0.57148213
  0.53500000   0.57148214
  0.53500000   0.57148215
  0.53500000   0.57148215
  0.53500000   0.57148216
  0.53500000   0.57148217
  0.53500000   0.57148217
  0.53500000   0.57148218
  0.53500000   0.57148219
  0.53500000   0.57148219
  0.53500000   0.57148220
  0.53500000   0.57148221
  0.53500000   0.57148221
  0.53500000   0.57148222
  0.53500000   0.57148222
  0.53500000   0.57148223
  0.53500000   0.57148224
  0.53500000   0.57148224
  0.53500000   0.57148225
  0.53500000   0.57148226
  0.53500000   0.57148226
  0.53500000   0.57148227
  0.53500000   0.57148228
  0.53500000   0.57148228
  0.53500000   0.57148229
  0.53500000   0.57148229
  0.53500000   0.57148230
  0.53600000   0.57187838
  0.53600000   0.57187839
  0.53600000   0.57187839
  0.53600000   0.57187840
  0.53600000   0.57187841
  0.53600000   0.57187841
  0.53600000   0.57187842
  0.53600000   0.57187843
  0.53600000   0.57187843
  0.53600000   0.57187844
  0.53600000   0.57187845
  0.53600000   0.57187845
  0.53600000   0.57187846
  0.53600000   0.57187847
  0.53600000   0.57187847
  0.53600000   0.57187848
  0.53600000   0.57187849
  0.53600000   0.57187849
  0.53600000   0.57187850
  0.53600000   0.57187851
  0.53600000   0.57187851
  0.53600000   0.57187852
  0.53600000   0.57187853
  0.53600000   0.57187853
  0.53600000   0.57187854
  0.53600000   0.57187855
  0.53600000   0.57187855
  0.53600000   0.57187856
  0.53600000   0.57187857
  0.53600000   0.57187857
  0.53600000   0.57187858
  0.53600000   0.57187859
  0.53600000   0.57187859
  0.53600000   0.57187860
  0.53600000   0.57187860
  0.53600000   0.57187861
  0.53600000   0.57187862
  0.53600000   0.57187862
  0.53600000   0.57187863
  0.53600000   0.57187864
  0.53700000   0.57227391
  0.53700000   0.57227392
  0.53700000   0.57227392
  0.53700000   0.57227393
  0.53700000   0.57227394
  0.53700000   0.57227394
  0.53700000   0.57227395
  0.53700000   0.57227396
  0.53700000   0.57227396
  0.53700000   0.57227397
  0.53700000   0.57227398
  0.53700000   0.57227398
  0.53700000   0.57227399
  0.53700000   0.57227400
  0.53700000   0.57227400
  0.53700000   0.57227401
  0.53700000   0.57227402
  0.53700000   0.57227402
  0.53700000   0.57227403
  0.53700000   0.57227404
  0.53700000   0.57227404
  0.53700000   0.57227405
  0.53700000   0.57227405
  0.53700000   0.57227406
  0.53700000   0.57227407
  0.53700000   0.57227407
  0.53700000   0.57227408
  0.53700000   0.57227409
  0.53700000   0.57227409
  0.53700000   0.57227410
  0.53700000   0.57227411
  0.53700000   0.57227411
  0.53700000   0.57227412
  0.53700000   0.57227413
  0.53700000   0.57227413
  0.53700000   0.57227414
  0.53700000   0.57227414
  0.53700000   0.57227415
  0.53700000   0.57227416
  0.53700000   0.57227416
  0.53800000   0.57266863
  0.53800000   0.57266864
  0.53800000   0.57266865
  0.53800000   0.57266865
  0.53800000   0.57266866
  0.53800000   0.57266867
  0.53800000   0.57266867
  0.53800000   0.57266868
  0.53800000   0.57266869
  0.53800000   0.57266869
  0.53800000   0.57266870
  0.53800000   0.57266871
  0.53800000   0.57266871
  0.53800000   0.57266872
  0.53800000   0.57266873
  0.53800000   0.57266873
  0.53800000   0.57266874
  0.53800000   0.57266875
  0.53800000   0.57266875
  0.53800000   0.57266876
  0.53800000   0.57266877
  0.53800000   0.57266877
  0.53800000   0.57266878
  0.53800000   0.57266878
  0.53800000   0.57266879
  0.53800000   0.57266880
  0.53800000   0.57266880
  0.53800000   0.57266881
  0.53800000   0.57266882
  0.53800000   0.57266882
  0.53800000   0.57266883
  0.53800000   0.57266884
  0.53800000   0.57266884
  0.53800000   0.57266885
  0.53800000   0.57266886
  0.53800000   0.57266886
  0.53800000   0.57266887
  0.53800000   0.57266887
  0.53800000   0.57266888
  0.53800000   0.57266889
  0.53900000   0.57306255
  0.53900000   0.57306256
  0.53900000   0.57306257
  0.53900000   0.57306257
  0.53900000   0.57306258
  0.53900000   0.57306259
  0.53900000   0.57306259
  0.53900000   0.57306260
  0.53900000   0.57306261
  0.53900000   0.57306261
  0.53900000   0.57306262
  0.53900000   0.57306263
  0.53900000   0.57306263
  0.53900000   0.57306264
  0.53900000   0.57306265
  0.53900000   0.57306265
  0.53900000   0.57306266
  0.53900000   0.57306267
  0.53900000   0.57306267
  0.53900000   0.57306268
  0.53900000   0.57306269
  0.53900000   0.57306269
  0.53900000   0.57306270
  0.53900000   0.57306271
  0.53900000   0.57306271
  0.53900000   0.57306272
  0.53900000   0.57306273
  0.53900000   0.57306273
  0.53900000   0.57306274
  0.53900000   0.57306275
  0.53900000   0.57306275
  0.53900000   0.57306276
  0.53900000   0.57306276
  0.53900000   0.57306277
  0.53900000   0.57306278
  0.53900000   0.57306278
  0.53900000   0.57306279
  0.53900000   0.57306280
  0.53900000   0.57306280
  0.53900000   0.57306281
  0.54000000   0.57345568
  0.54000000   0.57345568
  0.54000000   0.57345569
  0.54000000   0.57345570
  0.54000000   0.57345570
  0.54000000   0.57345571
  0.54000000   0.57345572
  0.54000000   0.57345572
  0.54000000   0.57345573
  0.54000000   0.57345574
  0.54000000   0.57345574
  0.54000000   0.57345575
  0.54000000   0.57345576
  0.54000000   0.57345576
  0.54000000   0.57345577
  0.54000000   0.57345578
  0.54000000   0.57345578
  0.54000000   0.57345579
  0.54000000   0.57345580
  0.54000000   0.57345580
  0.54000000   0.57345581
  0.54000000   0.57345582
  0.54000000   0.57345582
  0.54000000   0.57345583
  0.54000000   0.57345584
  0.54000000   0.57345584
  0.54000000   0.57345585
  0.54000000   0.57345586
  0.54000000   0.57345586
  0.54000000   0.57345587
  0.54000000   0.57345588
  0.54000000   0.57345588
  0.54000000   0.57345589
  0.54000000   0.57345589
  0.54000000   0.57345590
  0.54000000   0.57345591
  0.54000000   0.57345591
  0.54000000   0.57345592
  0.54000000   0.57345593
  0.54000000   0.57345593
  0.54100000   0.57384800
  0.54100000   0.57384801
  0.54100000   0.57384802
  0.54100000   0.57384802
  0.54100000   0.57384803
  0.54100000   0.57384804
  0.54100000   0.57384804
  0.54100000   0.57384805
  0.54100000   0.57384806
  0.54100000   0.57384806
  0.54100000   0.57384807
  0.54100000   0.57384808
  0.54100000   0.57384808
  0.54100000   0.57384809
  0.54100000   0.57384810
  0.54100000   0.57384810
  0.54100000   0.57384811
  0.54100000   0.57384812
  0.54100000   0.57384812
  0.54100000   0.57384813
  0.54100000   0.57384814
  0.54100000   0.57384814
  0.54100000   0.57384815
  0.54100000   0.57384816
  0.54100000   0.57384816
  0.54100000   0.57384817
  0.54100000   0.57384818
  0.54100000   0.57384818
  0.54100000   0.57384819
  0.54100000   0.57384820
  0.54100000   0.57384820
  0.54100000   0.57384821
  0.54100000   0.57384822
  0.54100000   0.57384822
  0.54100000   0.57384823
  0.54100000   0.57384823
  0.54100000   0.57384824
  0.54100000   0.57384825
  0.54100000   0.57384825
  0.54100000   0.57384826
  0.54200000   0.57423954
  0.54200000   0.57423954
  0.54200000   0.57423955
  0.54200000   0.57423956
  0.54200000   0.57423956
  0.54200000   0.57423957
  0.54200000   0.57423958
  0.54200000   0.57423958
  0.54200000   0.57423959
  0.54200000   0.57423960
  0.54200000   0.57423960
  0.54200000   0.57423961
  0.54200000   0.57423962
  0.54200000   0.57423962
  0.54200000   0.57423963
  0.54200000   0.57423964
  0.54200000   0.57423964
  0.54200000   0.57423965
  0.54200000   0.57423966
  0.54200000   0.57423966
  0.54200000   0.57423967
  0.54200000   0.57423968
  0.54200000   0.57423968
  0.54200000   0.57423969
  0.54200000   0.57423970
  0.54200000   0.57423970
  0.54200000   0.57423971
  0.54200000   0.57423972
  0.54200000   0.57423972
  0.54200000   0.57423973
  0.54200000   0.57423974
  0.54200000   0.57423974
  0.54200000   0.57423975
  0.54200000   0.57423976
  0.54200000   0.57423976
  0.54200000   0.57423977
  0.54200000   0.57423977
  0.54200000   0.57423978
  0.54200000   0.57423979
  0.54200000   0.57423979
  0.54300000   0.57463028
  0.54300000   0.57463029
  0.54300000   0.57463029
  0.54300000   0.57463030
  0.54300000   0.57463031
  0.54300000   0.57463031
  0.54300000   0.57463032
  0.54300000   0.57463033
  0.54300000   0.57463033
  0.54300000   0.57463034
  0.54300000   0.57463035
  0.54300000   0.57463035
  0.54300000   0.57463036
  0.54300000   0.57463037
  0.54300000   0.57463037
  0.54300000   0.57463038
  0.54300000   0.57463039
  0.54300000   0.57463039
  0.54300000   0.57463040
  0.54300000   0.57463041
  0.54300000   0.57463041
  0.54300000   0.57463042
  0.54300000   0.57463043
  0.54300000   0.57463043
  0.54300000   0.57463044
  0.54300000   0.57463045
  0.54300000   0.57463045
  0.54300000   0.57463046
  0.54300000   0.57463047
  0.54300000   0.57463047
  0.54300000   0.57463048
  0.54300000   0.57463049
  0.54300000   0.57463049
  0.54300000   0.57463050
  0.54300000   0.57463050
  0.54300000   0.57463051
  0.54300000   0.57463052
  0.54300000   0.57463052
  0.54300000   0.57463053
  0.54300000   0.57463054
  0.54400000   0.57502024
  0.54400000   0.57502024
  0.54400000   0.57502025
  0.54400000   0.57502026
  0.54400000   0.57502026
  0.54400000   0.57502027
  0.54400000   0.57502028
  0.54400000   0.57502028
  0.54400000   0.57502029
  0.54400000   0.57502030
  0.54400000   0.57502030
  0.54400000   0.57502031
  0.54400000   0.57502032
  0.54400000   0.57502032
  0.54400000   0.57502033
  0.54400000   0.57502034
  0.54400000   0.57502034
  0.54400000   0.57502035
  0.54400000   0.57502036
  0.54400000   0.57502036
  0.54400000   0.57502037
  0.54400000   0.57502038
  0.54400000   0.57502038
  0.54400000   0.57502039
  0.54400000   0.57502040
  0.54400000   0.57502040
  0.54400000   0.57502041
  0.54400000   0.57502041
  0.54400000   0.57502042
  0.54400000   0.57502043
  0.54400000   0.57502043
  0.54400000   0.57502044
  0.54400000   0.57502045
  0.54400000   0.57502045
  0.54400000   0.57502046
  0.54400000   0.57502047
  0.54400000   0.57502047
  0.54400000   0.57502048
  0.54400000   0.57502049
  0.54400000   0.57502049
  0.54500000   0.57540940
  0.54500000   0.57540941
  0.54500000   0.57540942
  0.54500000   0.57540943
  0.54500000   0.57540943
  0.54500000   0.57540944
  0.54500000   0.57540945
  0.54500000   0.57540945
  0.54500000   0.57540946
  0.54500000   0.57540947
  0.54500000   0.57540947
  0.54500000   0.57540948
  0.54500000   0.57540949
  0.54500000   0.57540949
  0.54500000   0.57540950
  0.54500000   0.57540951
  0.54500000   0.57540951
  0.54500000   0.57540952
  0.54500000   0.57540953
  0.54500000   0.57540953
  0.54500000   0.57540954
  0.54500000   0.57540955
  0.54500000   0.57540955
  0.54500000   0.57540956
  0.54500000   0.57540956
  0.54500000   0.57540957
  0.54500000   0.57540958
  0.54500000   0.57540958
  0.54500000   0.57540959
  0.54500000   0.57540960
  0.54500000   0.57540960
  0.54500000   0.57540961
  0.54500000   0.57540962
  0.54500000   0.57540962
  0.54500000   0.57540963
  0.54500000   0.57540964
  0.54500000   0.57540964
  0.54500000   0.57540965
  0.54500000   0.57540965
  0.54500000   0.57540966
  0.54600000   0.57579779
  0.54600000   0.57579780
  0.54600000   0.57579781
  0.54600000   0.57579781
  0.54600000   0.57579782
  0.54600000   0.57579783
  0.54600000   0.57579783
  0.54600000   0.57579784
  0.54600000   0.57579785
  0.54600000   0.57579785
  0.54600000   0.57579786
  0.54600000   0.57579787
  0.54600000   0.57579787
  0.54600000   0.57579788
  0.54600000   0.57579789
  0.54600000   0.57579789
  0.54600000   0.57579790
  0.54600000   0.57579791
  0.54600000   0.57579791
  0.54600000   0.57579792
  0.54600000   0.57579793
  0.54600000   0.57579793
  0.54600000   0.57579794
  0.54600000   0.57579795
  0.54600000   0.57579795
  0.54600000   0.57579796
  0.54600000   0.57579796
  0.54600000   0.57579797
  0.54600000   0.57579798
  0.54600000   0.57579798
  0.54600000   0.57579799
  0.54600000   0.57579800
  0.54600000   0.57579800
  0.54600000   0.57579801
  0.54600000   0.57579802
  0.54600000   0.57579802
  0.54600000   0.57579803
  0.54600000   0.57579804
  0.54600000   0.57579804
  0.54600000   0.57579805
  0.54700000   0.57618540
  0.54700000   0.57618540
  0.54700000   0.57618541
  0.54700000   0.57618542
  0.54700000   0.57618543
  0.54700000   0.57618543
  0.54700000   0.57618544
  0.54700000   0.57618545
  0.54700000   0.57618545
  0.54700000   0.57618546
  0.54700000   0.57618547
  0.54700000   0.57618547
  0.54700000   0.57618548
  0.54700000   0.57618549
  0.54700000   0.57618549
  0.54700000   0.57618550
  0.54700000   0.57618551
  0.54700000   0.57618551
  0.54700000   0.57618552
  0.54700000   0.57618553
  0.54700000   0.57618553
  0.54700000   0.57618554
  0.54700000   0.57618555
  0.54700000   0.57618555
  0.54700000   0.57618556
  0.54700000   0.57618556
  0.54700000   0.57618557
  0.54700000   0.57618558
  0.54700000   0.57618558
  0.54700000   0.57618559
  0.54700000   0.57618560
  0.54700000   0.57618560
  0.54700000   0.57618561
  0.54700000   0.57618562
  0.54700000   0.57618562
  0.54700000   0.57618563
  0.54700000   0.57618564
  0.54700000   0.57618564
  0.54700000   0.57618565
  0.54700000   0.57618565
  0.54800000   0.57657223
  0.54800000   0.57657223
  0.54800000   0.57657224
  0.54800000   0.57657225
  0.54800000   0.57657225
  0.54800000   0.57657226
  0.54800000   0.57657227
  0.54800000   0.57657227
  0.54800000   0.57657228
  0.54800000   0.57657229
  0.54800000   0.57657230
  0.54800000   0.57657230
  0.54800000   0.57657231
  0.54800000   0.57657232
  0.54800000   0.57657232
  0.54800000   0.57657233
  0.54800000   0.57657234
  0.54800000   0.57657234
  0.54800000   0.57657235
  0.54800000   0.57657235
  0.54800000   0.57657236
  0.54800000   0.57657237
  0.54800000   0.57657237
  0.54800000   0.57657238
  0.54800000   0.57657239
  0.54800000   0.57657239
  0.54800000   0.57657240
  0.54800000   0.57657241
  0.54800000   0.57657241
  0.54800000   0.57657242
  0.54800000   0.57657243
  0.54800000   0.57657243
  0.54800000   0.57657244
  0.54800000   0.57657245
  0.54800000   0.57657245
  0.54800000   0.57657246
  0.54800000   0.57657246
  0.54800000   0.57657247
  0.54800000   0.57657248
  0.54800000   0.57657248
  0.54900000   0.57695828
  0.54900000   0.57695829
  0.54900000   0.57695830
  0.54900000   0.57695830
  0.54900000   0.57695831
  0.54900000   0.57695832
  0.54900000   0.57695832
  0.54900000   0.57695833
  0.54900000   0.57695834
  0.54900000   0.57695834
  0.54900000   0.57695835
  0.54900000   0.57695836
  0.54900000   0.57695836
  0.54900000   0.57695837
  0.54900000   0.57695838
  0.54900000   0.57695838
  0.54900000   0.57695839
  0.54900000   0.57695840
  0.54900000   0.57695840
  0.54900000   0.57695841
  0.54900000   0.57695842
  0.54900000   0.57695842
  0.54900000   0.57695843
  0.54900000   0.57695844
  0.54900000   0.57695844
  0.54900000   0.57695845
  0.54900000   0.57695845
  0.54900000   0.57695846
  0.54900000   0.57695847
  0.54900000   0.57695847
  0.54900000   0.57695848
  0.54900000   0.57695849
  0.54900000   0.57695849
  0.54900000   0.57695850
  0.54900000   0.57695851
  0.54900000   0.57695851
  0.54900000   0.57695852
  0.54900000   0.57695853
  0.54900000   0.57695853
  0.54900000   0.57695854
  0.55000000   0.57734356
  0.55000000   0.57734357
  0.55000000   0.57734358
  0.55000000   0.57734358
  0.55000000   0.57734359
  0.55000000   0.57734360
  0.55000000   0.57734360
  0.55000000   0.57734361
  0.55000000   0.57734362
  0.55000000   0.57734362
  0.55000000   0.57734363
  0.55000000   0.57734364
  0.55000000   0.57734364
  0.55000000   0.57734365
  0.55000000   0.57734366
  0.55000000   0.57734366
  0.55000000   0.57734367
  0.55000000   0.57734368
  0.55000000   0.57734368
  0.55000000   0.57734369
  0.55000000   0.57734370
  0.55000000   0.57734370
  0.55000000   0.57734371
  0.55000000   0.57734372
  0.55000000   0.57734372
  0.55000000   0.57734373
  0.55000000   0.57734374
  0.55000000   0.57734374
  0.55000000   0.57734375
  0.55000000   0.57734376
  0.55000000   0.57734376
  0.55000000   0.57734377
  0.55000000   0.57734378
  0.55000000   0.57734378
  0.55000000   0.57734379
  0.55000000   0.57734379
  0.55000000   0.57734380
  0.55000000   0.57734381
  0.55000000   0.57734381
  0.55000000   0.57734382
  0.55100000   0.57772808
  0.55100000   0.57772808
  0.55100000   0.57772809
  0.55100000   0.57772810
  0.55100000   0.57772810
  0.55100000   0.57772811
  0.55100000   0.57772812
  0.55100000   0.57772812
  0.55100000   0.57772813
  0.55100000   0.57772814
  0.55100000   0.57772814
  0.55100000   0.57772815
  0.55100000   0.57772816
  0.55100000   0.57772816
  0.55100000   0.57772817
  0.55100000   0.57772818
  0.55100000   0.57772818
  0.55100000   0.57772819
  0.55100000   0.57772820
  0.55100000   0.57772820
  0.55100000   0.57772821
  0.55100000   0.57772822
  0.55100000   0.57772822
  0.55100000   0.57772823
  0.55100000   0.57772824
  0.55100000   0.57772824
  0.55100000   0.57772825
  0.55100000   0.57772826
  0.55100000   0.57772826
  0.55100000   0.57772827
  0.55100000   0.57772827
  0.55100000   0.57772828
  0.55100000   0.57772829
  0.55100000   0.57772829
  0.55100000   0.57772830
  0.55100000   0.57772831
  0.55100000   0.57772831
  0.55100000   0.57772832
  0.55100000   0.57772833
  0.55100000   0.57772833
  0.55200000   0.57811182
  0.55200000   0.57811183
  0.55200000   0.57811183
  0.55200000   0.57811184
  0.55200000   0.57811185
  0.55200000   0.57811185
  0.55200000   0.57811186
  0.55200000   0.57811187
  0.55200000   0.57811187
  0.55200000   0.57811188
  0.55200000   0.57811189
  0.55200000   0.57811189
  0.55200000   0.57811190
  0.55200000   0.57811191
  0.55200000   0.57811191
  0.55200000   0.57811192
  0.55200000   0.57811193
  0.55200000   0.57811193
  0.55200000   0.57811194
  0.55200000   0.57811195
  0.55200000   0.57811195
  0.55200000   0.57811196
  0.55200000   0.57811197
  0.55200000   0.57811197
  0.55200000   0.57811198
  0.55200000   0.57811199
  0.55200000   0.57811199
  0.55200000   0.57811200
  0.55200000   0.57811201
  0.55200000   0.57811201
  0.55200000   0.57811202
  0.55200000   0.57811203
  0.55200000   0.57811203
  0.55200000   0.57811204
  0.55200000   0.57811205
  0.55200000   0.57811205
  0.55200000   0.57811206
  0.55200000   0.57811206
  0.55200000   0.57811207
  0.55200000   0.57811208
  0.55300000   0.57849480
  0.55300000   0.57849481
  0.55300000   0.57849481
  0.55300000   0.57849482
  0.55300000   0.57849483
  0.55300000   0.57849483
  0.55300000   0.57849484
  0.55300000   0.57849485
  0.55300000   0.57849485
  0.55300000   0.57849486
  0.55300000   0.57849487
  0.55300000   0.57849488
  0.55300000   0.57849488
  0.55300000   0.57849489
  0.55300000   0.57849490
  0.55300000   0.57849490
  0.55300000   0.57849491
  0.55300000   0.57849492
  0.55300000   0.57849492
  0.55300000   0.57849493
  0.55300000   0.57849493
  0.55300000   0.57849494
  0.55300000   0.57849495
  0.55300000   0.57849495
  0.55300000   0.57849496
  0.55300000   0.57849497
  0.55300000   0.57849497
  0.55300000   0.57849498
  0.55300000   0.57849499
  0.55300000   0.57849499
  0.55300000   0.57849500
  0.55300000   0.57849501
  0.55300000   0.57849501
  0.55300000   0.57849502
  0.55300000   0.57849503
  0.55300000   0.57849503
  0.55300000   0.57849504
  0.55300000   0.57849505
  0.55300000   0.57849505
  0.55300000   0.57849506
  0.55400000   0.57887702
  0.55400000   0.57887703
  0.55400000   0.57887703
  0.55400000   0.57887704
  0.55400000   0.57887705
  0.55400000   0.57887705
  0.55400000   0.57887706
  0.55400000   0.57887707
  0.55400000   0.57887707
  0.55400000   0.57887708
  0.55400000   0.57887709
  0.55400000   0.57887709
  0.55400000   0.57887710
  0.55400000   0.57887711
  0.55400000   0.57887711
  0.55400000   0.57887712
  0.55400000   0.57887713
  0.55400000   0.57887713
  0.55400000   0.57887714
  0.55400000   0.57887715
  0.55400000   0.57887715
  0.55400000   0.57887716
  0.55400000   0.57887717
  0.55400000   0.57887717
  0.55400000   0.57887718
  0.55400000   0.57887719
  0.55400000   0.57887719
  0.55400000   0.57887720
  0.55400000   0.57887721
  0.55400000   0.57887721
  0.55400000   0.57887722
  0.55400000   0.57887722
  0.55400000   0.57887723
  0.55400000   0.57887724
  0.55400000   0.57887724
  0.55400000   0.57887725
  0.55400000   0.57887726
  0.55400000   0.57887726
  0.55400000   0.57887727
  0.55400000   0.57887728
  0.55500000   0.57925848
  0.55500000   0.57925848
  0.55500000   0.57925849
  0.55500000   0.57925850
  0.55500000   0.57925850
  0.55500000   0.57925851
  0.55500000   0.57925852
  0.55500000   0.57925852
  0.55500000   0.57925853
  0.55500000   0.57925854
  0.55500000   0.57925855
  0.55500000   0.57925855
  0.55500000   0.57925856
  0.55500000   0.57925857
  0.55500000   0.57925857
  0.55500000   0.57925858
  0.55500000   0.57925859
  0.55500000   0.57925859
  0.55500000   0.57925860
  0.55500000   0.57925861
  0.55500000   0.57925861
  0.55500000   0.57925862
  0.55500000   0.57925862
  0.55500000   0.57925863
  0.55500000   0.57925864
  0.55500000   0.57925864
  0.55500000   0.57925865
  0.55500000   0.57925866
  0.55500000   0.57925866
  0.55500000   0.57925867
  0.55500000   0.57925868
  0.55500000   0.57925868
  0.55500000   0.57925869
  0.55500000   0.57925870
  0.55500000   0.57925870
  0.55500000   0.57925871
  0.55500000   0.57925872
  0.55500000   0.57925872
  0.55500000   0.57925873
  0.55500000   0.57925873
  0.55600000   0.57963918
  0.55600000   0.57963919
  0.55600000   0.57963919
  0.55600000   0.57963920
  0.55600000   0.57963921
  0.55600000   0.57963921
  0.55600000   0.57963922
  0.55600000   0.57963923
  0.55600000   0.57963923
  0.55600000   0.57963924
  0.55600000   0.57963925
  0.55600000   0.57963925
  0.55600000   0.57963926
  0.55600000   0.57963927
  0.55600000   0.57963927
  0.55600000   0.57963928
  0.55600000   0.57963929
  0.55600000   0.57963929
  0.55600000   0.57963930
  0.55600000   0.57963931
  0.55600000   0.57963931
  0.55600000   0.57963932
  0.55600000   0.57963933
  0.55600000   0.57963933
  0.55600000   0.57963934
  0.55600000   0.57963935
  0.55600000   0.57963935
  0.55600000   0.57963936
  0.55600000   0.57963937
  0.55600000   0.57963937
  0.55600000   0.57963938
  0.55600000   0.57963938
  0.55600000   0.57963939
  0.55600000   0.57963940
  0.55600000   0.57963940
  0.55600000   0.57963941
  0.55600000   0.57963942
  0.55600000   0.57963942
  0.55600000   0.57963943
  0.55600000   0.57963944
  0.55700000   0.58001913
  0.55700000   0.58001913
  0.55700000   0.58001914
  0.55700000   0.58001915
  0.55700000   0.58001915
  0.55700000   0.58001916
  0.55700000   0.58001917
  0.55700000   0.58001917
  0.55700000   0.58001918
  0.55700000   0.58001919
  0.55700000   0.58001919
  0.55700000   0.58001920
  0.55700000   0.58001921
  0.55700000   0.58001921
  0.55700000   0.58001922
  0.55700000   0.58001923
  0.55700000   0.58001923
  0.55700000   0.58001924
  0.55700000   0.58001925
  0.55700000   0.58001925
  0.55700000   0.58001926
  0.55700000   0.58001927
  0.55700000   0.58001927
  0.55700000   0.58001928
  0.55700000   0.58001929
  0.55700000   0.58001929
  0.55700000   0.58001930
  0.55700000   0.58001931
  0.55700000   0.58001931
  0.55700000   0.58001932
  0.55700000   0.58001933
  0.55700000   0.58001933
  0.55700000   0.58001934
  0.55700000   0.58001934
  0.55700000   0.58001935
  0.55700000   0.58001936
  0.55700000   0.58001936
  0.55700000   0.58001937
  0.55700000   0.58001938
  0.55700000   0.58001938
  0.55800000   0.58039832
  0.55800000   0.58039833
  0.55800000   0.58039833
  0.55800000   0.58039834
  0.55800000   0.58039835
  0.55800000   0.58039835
  0.55800000   0.58039836
  0.55800000   0.58039837
  0.55800000   0.58039837
  0.55800000   0.58039838
  0.55800000   0.58039839
  0.55800000   0.58039839
  0.55800000   0.58039840
  0.55800000   0.58039841
  0.55800000   0.58039841
  0.55800000   0.58039842
  0.55800000   0.58039843
  0.55800000   0.58039843
  0.55800000   0.58039844
  0.55800000   0.58039845
  0.55800000   0.58039845
  0.55800000   0.58039846
  0.55800000   0.58039847
  0.55800000   0.58039847
  0.55800000   0.58039848
  0.55800000   0.58039849
  0.55800000   0.58039849
  0.55800000   0.58039850
  0.55800000   0.58039851
  0.55800000   0.58039851
  0.55800000   0.58039852
  0.55800000   0.58039853
  0.55800000   0.58039853
  0.55800000   0.58039854
  0.55800000   0.58039855
  0.55800000   0.58039855
  0.55800000   0.58039856
  0.55800000   0.58039857
  0.55800000   0.58039857
  0.55800000   0.58039858
  0.55900000   0.58077676
  0.55900000   0.58077677
  0.55900000   0.58077678
  0.55900000   0.58077679
  0.55900000   0.58077679
  0.55900000   0.58077680
  0.55900000   0.58077681
  0.55900000   0.58077681
  0.55900000   0.58077682
  0.55900000   0.58077683
  0.55900000   0.58077683
  0.55900000   0.58077684
  0.55900000   0.58077685
  0.55900000   0.58077685
  0.55900000   0.58077686
  0.55900000   0.58077687
  0.55900000   0.58077687
  0.55900000   0.58077688
  0.55900000   0.58077689
  0.55900000   0.58077689
  0.55900000   0.58077690
  0.55900000   0.58077691
  0.55900000   0.58077691
  0.55900000   0.58077692
  0.55900000   0.58077693
  0.55900000   0.58077693
  0.55900000   0.58077694
  0.55900000   0.58077695
  0.55900000   0.58077695
  0.55900000   0.58077696
  0.55900000   0.58077697
  0.55900000   0.58077697
  0.55900000   0.58077698
  0.55900000   0.58077698
  0.55900000   0.58077699
  0.55900000   0.58077700
  0.55900000   0.58077700
  0.55900000   0.58077701
  0.55900000   0.58077702
  0.55900000   0.58077702
  0.56000000   0.58115446
  0.56000000   0.58115447
  0.56000000   0.58115448
  0.56000000   0.58115448
  0.56000000   0.58115449
  0.56000000   0.58115450
  0.56000000   0.58115450
  0.56000000   0.58115451
  0.56000000   0.58115452
  0.56000000   0.58115452
  0.56000000   0.58115453
  0.56000000   0.58115454
  0.56000000   0.58115454
  0.56000000   0.58115455
  0.56000000   0.58115456
  0.56000000   0.58115456
  0.56000000   0.58115457
  0.56000000   0.58115458
  0.56000000   0.58115458
  0.56000000   0.58115459
  0.56000000   0.58115460
  0.56000000   0.58115460
  0.56000000   0.58115461
  0.56000000   0.58115462
  0.56000000   0.58115462
  0.56000000   0.58115463
  0.56000000   0.58115464
  0.56000000   0.58115464
  0.56000000   0.58115465
  0.56000000   0.58115466
  0.56000000   0.58115466
  0.56000000   0.58115467
  0.56000000   0.58115468
  0.56000000   0.58115468
  0.56000000   0.58115469
  0.56000000   0.58115470
  0.56000000   0.58115470
  0.56000000   0.58115471
  0.56000000   0.58115471
  0.56000000   0.58115472
  0.56100000   0.58153142
  0.56100000   0.58153142
  0.56100000   0.58153143
  0.56100000   0.58153144
  0.56100000   0.58153144
  0.56100000   0.58153145
  0.56100000   0.58153146
  0.56100000   0.58153146
  0.56100000   0.58153147
  0.56100000   0.58153148
  0.56100000   0.58153148
  0.56100000   0.58153149
  0.56100000   0.58153150
  0.56100000   0.58153150
  0.56100000   0.58153151
  0.56100000   0.58153152
  0.56100000   0.58153152
  0.56100000   0.58153153
  0.56100000   0.58153154
  0.56100000   0.58153154
  0.56100000   0.58153155
  0.56100000   0.58153156
  0.56100000   0.58153156
  0.56100000   0.58153157
  0.56100000   0.58153158
  0.56100000   0.58153158
  0.56100000   0.58153159
  0.56100000   0.58153160
  0.56100000   0.58153160
  0.56100000   0.58153161
  0.56100000   0.58153162
  0.56100000   0.58153162
  0.56100000   0.58153163
  0.56100000   0.58153164
  0.56100000   0.58153164
  0.56100000   0.58153165
  0.56100000   0.58153166
  0.56100000   0.58153166
  0.56100000   0.58153167
  0.56100000   0.58153167
  0.56200000   0.58190763
  0.56200000   0.58190763
  0.56200000   0.58190764
  0.56200000   0.58190765
  0.56200000   0.58190765
  0.56200000   0.58190766
  0.56200000   0.58190767
  0.56200000   0.58190767
  0.56200000   0.58190768
  0.56200000   0.58190769
  0.56200000   0.58190770
  0.56200000   0.58190770
  0.56200000   0.58190771
  0.56200000   0.58190772
  0.56200000   0.58190772
  0.56200000   0.58190773
  0.56200000   0.58190774
  0.56200000   0.58190774
  0.56200000   0.58190775
  0.56200000   0.58190776
  0.56200000   0.58190776
  0.56200000   0.58190777
  0.56200000   0.58190778
  0.56200000   0.58190778
  0.56200000   0.58190779
  0.56200000   0.58190779
  0.56200000   0.58190780
  0.56200000   0.58190781
  0.56200000   0.58190781
  0.56200000   0.58190782
  0.56200000   0.58190783
  0.56200000   0.58190783
  0.56200000   0.58190784
  0.56200000   0.58190785
  0.56200000   0.58190785
  0.56200000   0.58190786
  0.56200000   0.58190787
  0.56200000   0.58190787
  0.56200000   0.58190788
  0.56200000   0.58190789
  0.56300000   0.58228310
  0.56300000   0.58228310
  0.56300000   0.58228311
  0.56300000   0.58228312
  0.56300000   0.58228313
  0.56300000   0.58228313
  0.56300000   0.58228314
  0.56300000   0.58228315
  0.56300000   0.58228315
  0.56300000   0.58228316
  0.56300000   0.58228317
  0.56300000   0.58228317
  0.56300000   0.58228318
  0.56300000   0.58228319
  0.56300000   0.58228319
  0.56300000   0.58228320
  0.56300000   0.58228321
  0.56300000   0.58228321
  0.56300000   0.58228322
  0.56300000   0.58228323
  0.56300000   0.58228323
  0.56300000   0.58228324
  0.56300000   0.58228325
  0.56300000   0.58228325
  0.56300000   0.58228326
  0.56300000   0.58228327
  0.56300000   0.58228327
  0.56300000   0.58228328
  0.56300000   0.58228329
  0.56300000   0.58228329
  0.56300000   0.58228330
  0.56300000   0.58228331
  0.56300000   0.58228331
  0.56300000   0.58228332
  0.56300000   0.58228332
  0.56300000   0.58228333
  0.56300000   0.58228334
  0.56300000   0.58228334
  0.56300000   0.58228335
  0.56300000   0.58228336
  0.56400000   0.58265783
  0.56400000   0.58265784
  0.56400000   0.58265785
  0.56400000   0.58265785
  0.56400000   0.58265786
  0.56400000   0.58265787
  0.56400000   0.58265787
  0.56400000   0.58265788
  0.56400000   0.58265789
  0.56400000   0.58265789
  0.56400000   0.58265790
  0.56400000   0.58265791
  0.56400000   0.58265791
  0.56400000   0.58265792
  0.56400000   0.58265793
  0.56400000   0.58265793
  0.56400000   0.58265794
  0.56400000   0.58265795
  0.56400000   0.58265795
  0.56400000   0.58265796
  0.56400000   0.58265797
  0.56400000   0.58265797
  0.56400000   0.58265798
  0.56400000   0.58265799
  0.56400000   0.58265799
  0.56400000   0.58265800
  0.56400000   0.58265801
  0.56400000   0.58265801
  0.56400000   0.58265802
  0.56400000   0.58265803
  0.56400000   0.58265803
  0.56400000   0.58265804
  0.56400000   0.58265805
  0.56400000   0.58265805
  0.56400000   0.58265806
  0.56400000   0.58265806
  0.56400000   0.58265807
  0.56400000   0.58265808
  0.56400000   0.58265808
  0.56400000   0.58265809
  0.56500000   0.58303183
  0.56500000   0.58303184
  0.56500000   0.58303184
  0.56500000   0.58303185
  0.56500000   0.58303186
  0.56500000   0.58303186
  0.56500000   0.58303187
  0.56500000   0.58303188
  0.56500000   0.58303188
  0.56500000   0.58303189
  0.56500000   0.58303190
  0.56500000   0.58303190
  0.56500000   0.58303191
  0.56500000   0.58303192
  0.56500000   0.58303193
  0.56500000   0.58303193
  0.56500000   0.58303194
  0.56500000   0.58303195
  0.56500000   0.58303195
  0.56500000   0.58303196
  0.56500000   0.58303197
  0.56500000   0.58303197
  0.56500000   0.58303198
  0.56500000   0.58303198
  0.56500000   0.58303199
  0.56500000   0.58303200
  0.56500000   0.58303200
  0.56500000   0.58303201
  0.56500000   0.58303202
  0.56500000   0.58303202
  0.56500000   0.58303203
  0.56500000   0.58303204
  0.56500000   0.58303204
  0.56500000   0.58303205
  0.56500000   0.58303206
  0.56500000   0.58303206
  0.56500000   0.58303207
  0.56500000   0.58303208
  0.56500000   0.58303208
  0.56500000   0.58303209
  0.56600000   0.58340510
  0.56600000   0.58340510
  0.56600000   0.58340511
  0.56600000   0.58340512
  0.56600000   0.58340512
  0.56600000   0.58340513
  0.56600000   0.58340514
  0.56600000   0.58340514
  0.56600000   0.58340515
  0.56600000   0.58340516
  0.56600000   0.58340516
  0.56600000   0.58340517
  0.56600000   0.58340518
  0.56600000   0.58340518
  0.56600000   0.58340519
  0.56600000   0.58340520
  0.56600000   0.58340520
  0.56600000   0.58340521
  0.56600000   0.58340522
  0.56600000   0.58340522
  0.56600000   0.58340523
  0.56600000   0.58340524
  0.56600000   0.58340524
  0.56600000   0.58340525
  0.56600000   0.58340526
  0.56600000   0.58340526
  0.56600000   0.58340527
  0.56600000   0.58340528
  0.56600000   0.58340528
  0.56600000   0.58340529
  0.56600000   0.58340530
  0.56600000   0.58340530
  0.56600000   0.58340531
  0.56600000   0.58340532
  0.56600000   0.58340532
  0.56600000   0.58340533
  0.56600000   0.58340534
  0.56600000   0.58340534
  0.56600000   0.58340535
  0.56600000   0.58340535
  0.56700000   0.58377763
  0.56700000   0.58377764
  0.56700000   0.58377764
  0.56700000   0.58377765
  0.56700000   0.58377766
  0.56700000   0.58377767
  0.56700000   0.58377767
  0.56700000   0.58377768
  0.56700000   0.58377769
  0.56700000   0.58377769
  0.56700000   0.58377770
  0.56700000   0.58377771
  0.56700000   0.58377771
  0.56700000   0.58377772
  0.56700000   0.58377773
  0.56700000   0.58377773
  0.56700000   0.58377774
  0.56700000   0.58377775
  0.56700000   0.58377775
  0.56700000   0.58377776
  0.56700000   0.58377777
  0.56700000   0.58377777
  0.56700000   0.58377778
  0.56700000   0.58377779
  0.56700000   0.58377779
  0.56700000   0.58377780
  0.56700000   0.58377781
  0.56700000   0.58377781
  0.56700000   0.58377782
  0.56700000   0.58377783
  0.56700000   0.58377783
  0.56700000   0.58377784
  0.56700000   0.58377785
  0.56700000   0.58377785
  0.56700000   0.58377786
  0.56700000   0.58377786
  0.56700000   0.58377787
  0.56700000   0.58377788
  0.56700000   0.58377788
  0.56700000   0.58377789
  0.56800000   0.58414944
  0.56800000   0.58414945
  0.56800000   0.58414945
  0.56800000   0.58414946
  0.56800000   0.58414947
  0.56800000   0.58414947
  0.56800000   0.58414948
  0.56800000   0.58414949
  0.56800000   0.58414949
  0.56800000   0.58414950
  0.56800000   0.58414951
  0.56800000   0.58414951
  0.56800000   0.58414952
  0.56800000   0.58414953
  0.56800000   0.58414953
  0.56800000   0.58414954
  0.56800000   0.58414955
  0.56800000   0.58414955
  0.56800000   0.58414956
  0.56800000   0.58414957
  0.56800000   0.58414957
  0.56800000   0.58414958
  0.56800000   0.58414959
  0.56800000   0.58414959
  0.56800000   0.58414960
  0.56800000   0.58414961
  0.56800000   0.58414961
  0.56800000   0.58414962
  0.56800000   0.58414963
  0.56800000   0.58414963
  0.56800000   0.58414964
  0.56800000   0.58414965
  0.56800000   0.58414965
  0.56800000   0.58414966
  0.56800000   0.58414967
  0.56800000   0.58414967
  0.56800000   0.58414968
  0.56800000   0.58414969
  0.56800000   0.58414969
  0.56800000   0.58414970
  0.56900000   0.58452052
  0.56900000   0.58452053
  0.56900000   0.58452053
  0.56900000   0.58452054
  0.56900000   0.58452055
  0.56900000   0.58452056
  0.56900000   0.58452056
  0.56900000   0.58452057
  0.56900000   0.58452058
  0.56900000   0.58452058
  0.56900000   0.58452059
  0.56900000   0.58452060
  0.56900000   0.58452060
  0.56900000   0.58452061
  0.56900000   0.58452062
  0.56900000   0.58452062
  0.56900000   0.58452063
  0.56900000   0.58452064
  0.56900000   0.58452064
  0.56900000   0.58452065
  0.56900000   0.58452066
  0.56900000   0.58452066
  0.56900000   0.58452067
  0.56900000   0.58452068
  0.56900000   0.58452068
  0.56900000   0.58452069
  0.56900000   0.58452070
  0.56900000   0.58452070
  0.56900000   0.58452071
  0.56900000   0.58452072
  0.56900000   0.58452072
  0.56900000   0.58452073
  0.56900000   0.58452074
  0.56900000   0.58452074
  0.56900000   0.58452075
  0.56900000   0.58452075
  0.56900000   0.58452076
  0.56900000   0.58452077
  0.56900000   0.58452077
  0.56900000   0.58452078
  0.57000000   0.58489088
  0.57000000   0.58489089
  0.57000000   0.58489089
  0.57000000   0.58489090
  0.57000000   0.58489091
  0.57000000   0.58489091
  0.57000000   0.58489092
  0.57000000   0.58489093
  0.57000000   0.58489093
  0.57000000   0.58489094
  0.57000000   0.58489095
  0.57000000   0.58489096
  0.57000000   0.58489096
  0.57000000   0.58489097
  0.57000000   0.58489098
  0.57000000   0.58489098
  0.57000000   0.58489099
  0.57000000   0.58489100
  0.57000000   0.58489100
  0.57000000   0.58489101
  0.57000000   0.58489102
  0.57000000   0.58489102
  0.57000000   0.58489103
  0.57000000   0.58489104
  0.57000000   0.58489104
  0.57000000   0.58489105
  0.57000000   0.58489106
  0.57000000   0.58489106
  0.57000000   0.58489107
  0.57000000   0.58489107
  0.57000000   0.58489108
  0.57000000   0.58489109
  0.57000000   0.58489109
  0.57000000   0.58489110
  0.57000000   0.58489111
  0.57000000   0.58489111
  0.57000000   0.58489112
  0.57000000   0.58489113
  0.57000000   0.58489113
  0.57000000   0.58489114
  0.57100000   0.58526052
  0.57100000   0.58526052
  0.57100000   0.58526053
  0.57100000   0.58526054
  0.57100000   0.58526055
  0.57100000   0.58526055
  0.57100000   0.58526056
  0.57100000   0.58526057
  0.57100000   0.58526057
  0.57100000   0.58526058
  0.57100000   0.58526059
  0.57100000   0.58526059
  0.57100000   0.58526060
  0.57100000   0.58526061
  0.57100000   0.58526061
  0.57100000   0.58526062
  0.57100000   0.58526063
  0.57100000   0.58526063
  0.57100000   0.58526064
  0.57100000   0.58526065
  0.57100000   0.58526065
  0.57100000   0.58526066
  0.57100000   0.58526067
  0.57100000   0.58526067
  0.57100000   0.58526068
  0.57100000   0.58526069
  0.57100000   0.58526069
  0.57100000   0.58526070
  0.57100000   0.58526071
  0.57100000   0.58526071
  0.57100000   0.58526072
  0.57100000   0.58526073
  0.57100000   0.58526073
  0.57100000   0.58526074
  0.57100000   0.58526075
  0.57100000   0.58526075
  0.57100000   0.58526076
  0.57100000   0.58526076
  0.57100000   0.58526077
  0.57100000   0.58526078
  0.57200000   0.58562944
  0.57200000   0.58562944
  0.57200000   0.58562945
  0.57200000   0.58562946
  0.57200000   0.58562946
  0.57200000   0.58562947
  0.57200000   0.58562948
  0.57200000   0.58562949
  0.57200000   0.58562949
  0.57200000   0.58562950
  0.57200000   0.58562951
  0.57200000   0.58562951
  0.57200000   0.58562952
  0.57200000   0.58562953
  0.57200000   0.58562953
  0.57200000   0.58562954
  0.57200000   0.58562955
  0.57200000   0.58562955
  0.57200000   0.58562956
  0.57200000   0.58562957
  0.57200000   0.58562957
  0.57200000   0.58562958
  0.57200000   0.58562959
  0.57200000   0.58562959
  0.57200000   0.58562960
  0.57200000   0.58562961
  0.57200000   0.58562961
  0.57200000   0.58562962
  0.57200000   0.58562963
  0.57200000   0.58562963
  0.57200000   0.58562964
  0.57200000   0.58562965
  0.57200000   0.58562965
  0.57200000   0.58562966
  0.57200000   0.58562966
  0.57200000   0.58562967
  0.57200000   0.58562968
  0.57200000   0.58562968
  0.57200000   0.58562969
  0.57200000   0.58562970
  0.57300000   0.58599764
  0.57300000   0.58599765
  0.57300000   0.58599765
  0.57300000   0.58599766
  0.57300000   0.58599767
  0.57300000   0.58599768
  0.57300000   0.58599768
  0.57300000   0.58599769
  0.57300000   0.58599770
  0.57300000   0.58599770
  0.57300000   0.58599771
  0.57300000   0.58599772
  0.57300000   0.58599772
  0.57300000   0.58599773
  0.57300000   0.58599774
  0.57300000   0.58599774
  0.57300000   0.58599775
  0.57300000   0.58599776
  0.57300000   0.58599776
  0.57300000   0.58599777
  0.57300000   0.58599778
  0.57300000   0.58599778
  0.57300000   0.58599779
  0.57300000   0.58599780
  0.57300000   0.58599780
  0.57300000   0.58599781
  0.57300000   0.58599782
  0.57300000   0.58599782
  0.57300000   0.58599783
  0.57300000   0.58599784
  0.57300000   0.58599784
  0.57300000   0.58599785
  0.57300000   0.58599786
  0.57300000   0.58599786
  0.57300000   0.58599787
  0.57300000   0.58599787
  0.57300000   0.58599788
  0.57300000   0.58599789
  0.57300000   0.58599789
  0.57300000   0.58599790
  0.57400000   0.58636513
  0.57400000   0.58636514
  0.57400000   0.58636514
  0.57400000   0.58636515
  0.57400000   0.58636516
  0.57400000   0.58636516
  0.57400000   0.58636517
  0.57400000   0.58636518
  0.57400000   0.58636518
  0.57400000   0.58636519
  0.57400000   0.58636520
  0.57400000   0.58636521
  0.57400000   0.58636521
  0.57400000   0.58636522
  0.57400000   0.58636523
  0.57400000   0.58636523
  0.57400000   0.58636524
  0.57400000   0.58636525
  0.57400000   0.58636525
  0.57400000   0.58636526
  0.57400000   0.58636527
  0.57400000   0.58636527
  0.57400000   0.58636528
  0.57400000   0.58636529
  0.57400000   0.58636529
  0.57400000   0.58636530
  0.57400000   0.58636531
  0.57400000   0.58636531
  0.57400000   0.58636532
  0.57400000   0.58636533
  0.57400000   0.58636533
  0.57400000   0.58636534
  0.57400000   0.58636534
  0.57400000   0.58636535
  0.57400000   0.58636536
  0.57400000   0.58636536
  0.57400000   0.58636537
  0.57400000   0.58636538
  0.57400000   0.58636538
  0.57400000   0.58636539
  0.57500000   0.58673191
  0.57500000   0.58673191
  0.57500000   0.58673192
  0.57500000   0.58673193
  0.57500000   0.58673194
  0.57500000   0.58673194
  0.57500000   0.58673195
  0.57500000   0.58673196
  0.57500000   0.58673196
  0.57500000   0.58673197
  0.57500000   0.58673198
  0.57500000   0.58673198
  0.57500000   0.58673199
  0.57500000   0.58673200
  0.57500000   0.58673200
  0.57500000   0.58673201
  0.57500000   0.58673202
  0.57500000   0.58673202
  0.57500000   0.58673203
  0.57500000   0.58673204
  0.57500000   0.58673204
  0.57500000   0.58673205
  0.57500000   0.58673206
  0.57500000   0.58673206
  0.57500000   0.58673207
  0.57500000   0.58673208
  0.57500000   0.58673208
  0.57500000   0.58673209
  0.57500000   0.58673210
  0.57500000   0.58673210
  0.57500000   0.58673211
  0.57500000   0.58673212
  0.57500000   0.58673212
  0.57500000   0.58673213
  0.57500000   0.58673214
  0.57500000   0.58673214
  0.57500000   0.58673215
  0.57500000   0.58673215
  0.57500000   0.58673216
  0.57500000   0.58673217
  0.57600000   0.58709798
  0.57600000   0.58709798
  0.57600000   0.58709799
  0.57600000   0.58709800
  0.57600000   0.58709800
  0.57600000   0.58709801
  0.57600000   0.58709802
  0.57600000   0.58709802
  0.57600000   0.58709803
  0.57600000   0.58709804
  0.57600000   0.58709804
  0.57600000   0.58709805
  0.57600000   0.58709806
  0.57600000   0.58709806
  0.57600000   0.58709807
  0.57600000   0.58709808
  0.57600000   0.58709808
  0.57600000   0.58709809
  0.57600000   0.58709810
  0.57600000   0.58709811
  0.57600000   0.58709811
  0.57600000   0.58709812
  0.57600000   0.58709813
  0.57600000   0.58709813
  0.57600000   0.58709814
  0.57600000   0.58709814
  0.57600000   0.58709815
  0.57600000   0.58709816
  0.57600000   0.58709816
  0.57600000   0.58709817
  0.57600000   0.58709818
  0.57600000   0.58709818
  0.57600000   0.58709819
  0.57600000   0.58709820
  0.57600000   0.58709820
  0.57600000   0.58709821
  0.57600000   0.58709822
  0.57600000   0.58709822
  0.57600000   0.58709823
  0.57600000   0.58709824
  0.57700000   0.58746334
  0.57700000   0.58746334
  0.57700000   0.58746335
  0.57700000   0.58746336
  0.57700000   0.58746336
  0.57700000   0.58746337
  0.57700000   0.58746338
  0.57700000   0.58746339
  0.57700000   0.58746339
  0.57700000   0.58746340
  0.57700000   0.58746341
  0.57700000   0.58746341
  0.57700000   0.58746342
  0.57700000   0.58746343
  0.57700000   0.58746343
  0.57700000   0.58746344
  0.57700000   0.58746345
  0.57700000   0.58746345
  0.57700000   0.58746346
  0.57700000   0.58746347
  0.57700000   0.58746347
  0.57700000   0.58746348
  0.57700000   0.58746349
  0.57700000   0.58746349
  0.57700000   0.58746350
  0.57700000   0.58746351
  0.57700000   0.58746351
  0.57700000   0.58746352
  0.57700000   0.58746353
  0.57700000   0.58746353
  0.57700000   0.58746354
  0.57700000   0.58746355
  0.57700000   0.58746355
  0.57700000   0.58746356
  0.57700000   0.58746356
  0.57700000   0.58746357
  0.57700000   0.58746358
  0.57700000   0.58746358
  0.57700000   0.58746359
  0.57700000   0.58746360
  0.57800000   0.58782799
  0.57800000   0.58782800
  0.57800000   0.58782801
  0.57800000   0.58782801
  0.57800000   0.58782802
  0.57800000   0.58782803
  0.57800000   0.58782803
  0.57800000   0.58782804
  0.57800000   0.58782805
  0.57800000   0.58782806
  0.57800000   0.58782806
  0.57800000   0.58782807
  0.57800000   0.58782808
  0.57800000   0.58782808
  0.57800000   0.58782809
  0.57800000   0.58782810
  0.57800000   0.58782810
  0.57800000   0.58782811
  0.57800000   0.58782812
  0.57800000   0.58782812
  0.57800000   0.58782813
  0.57800000   0.58782814
  0.57800000   0.58782814
  0.57800000   0.58782815
  0.57800000   0.58782816
  0.57800000   0.58782816
  0.57800000   0.58782817
  0.57800000   0.58782818
  0.57800000   0.58782818
  0.57800000   0.58782819
  0.57800000   0.58782820
  0.57800000   0.58782820
  0.57800000   0.58782821
  0.57800000   0.58782821
  0.57800000   0.58782822
  0.57800000   0.58782823
  0.57800000   0.58782823
  0.57800000   0.58782824
  0.57800000   0.58782825
  0.57800000   0.58782825
  0.57900000   0.58819195
  0.57900000   0.58819195
  0.57900000   0.58819196
  0.57900000   0.58819197
  0.57900000   0.58819197
  0.57900000   0.58819198
  0.57900000   0.58819199
  0.57900000   0.58819200
  0.57900000   0.58819200
  0.57900000   0.58819201
  0.57900000   0.58819202
  0.57900000   0.58819202
  0.57900000   0.58819203
  0.57900000   0.58819204
  0.57900000   0.58819204
  0.57900000   0.58819205
  0.57900000   0.58819206
  0.57900000   0.58819206
  0.57900000   0.58819207
  0.57900000   0.58819208
  0.57900000   0.58819208
  0.57900000   0.58819209
  0.57900000   0.58819210
  0.57900000   0.58819210
  0.57900000   0.58819211
  0.57900000   0.58819212
  0.57900000   0.58819212
  0.57900000   0.58819213
  0.57900000   0.58819214
  0.57900000   0.58819214
  0.57900000   0.58819215
  0.57900000   0.58819216
  0.57900000   0.58819216
  0.57900000   0.58819217
  0.57900000   0.58819218
  0.57900000   0.58819218
  0.57900000   0.58819219
  0.57900000   0.58819219
  0.57900000   0.58819220
  0.57900000   0.58819221
  0.58000000   0.58855520
  0.58000000   0.58855521
  0.58000000   0.58855521
  0.58000000   0.58855522
  0.58000000   0.58855523
  0.58000000   0.58855524
  0.58000000   0.58855524
  0.58000000   0.58855525
  0.58000000   0.58855526
  0.58000000   0.58855526
  0.58000000   0.58855527
  0.58000000   0.58855528
  0.58000000   0.58855528
  0.58000000   0.58855529
  0.58000000   0.58855530
  0.58000000   0.58855530
  0.58000000   0.58855531
  0.58000000   0.58855532
  0.58000000   0.58855532
  0.58000000   0.58855533
  0.58000000   0.58855534
  0.58000000   0.58855534
  0.58000000   0.58855535
  0.58000000   0.58855536
  0.58000000   0.58855536
  0.58000000   0.58855537
  0.58000000   0.58855538
  0.58000000   0.58855538
  0.58000000   0.58855539
  0.58000000   0.58855540
  0.58000000   0.58855540
  0.58000000   0.58855541
  0.58000000   0.58855542
  0.58000000   0.58855542
  0.58000000   0.58855543
  0.58000000   0.58855544
  0.58000000   0.58855544
  0.58000000   0.58855545
  0.58000000   0.58855545
  0.58000000   0.58855546
  0.58100000   0.58891776
  0.58100000   0.58891776
  0.58100000   0.58891777
  0.58100000   0.58891778
  0.58100000   0.58891778
  0.58100000   0.58891779
  0.58100000   0.58891780
  0.58100000   0.58891780
  0.58100000   0.58891781
  0.58100000   0.58891782
  0.58100000   0.58891782
  0.58100000   0.58891783
  0.58100000   0.58891784
  0.58100000   0.58891784
  0.58100000   0.58891785
  0.58100000   0.58891786
  0.58100000   0.58891787
  0.58100000   0.58891787
  0.58100000   0.58891788
  0.58100000   0.58891789
  0.58100000   0.58891789
  0.58100000   0.58891790
  0.58100000   0.58891791
  0.58100000   0.58891791
  0.58100000   0.58891792
  0.58100000   0.58891793
  0.58100000   0.58891793
  0.58100000   0.58891794
  0.58100000   0.58891794
  0.58100000   0.58891795
  0.58100000   0.58891796
  0.58100000   0.58891796
  0.58100000   0.58891797
  0.58100000   0.58891798
  0.58100000   0.58891798
  0.58100000   0.58891799
  0.58100000   0.58891800
  0.58100000   0.58891800
  0.58100000   0.58891801
  0.58100000   0.58891802
  0.58200000   0.58927962
  0.58200000   0.58927962
  0.58200000   0.58927963
  0.58200000   0.58927964
  0.58200000   0.58927964
  0.58200000   0.58927965
  0.58200000   0.58927966
  0.58200000   0.58927966
  0.58200000   0.58927967
  0.58200000   0.58927968
  0.58200000   0.58927968
  0.58200000   0.58927969
  0.58200000   0.58927970
  0.58200000   0.58927970
  0.58200000   0.58927971
  0.58200000   0.58927972
  0.58200000   0.58927972
  0.58200000   0.58927973
  0.58200000   0.58927974
  0.58200000   0.58927974
  0.58200000   0.58927975
  0.58200000   0.58927976
  0.58200000   0.58927976
  0.58200000   0.58927977
  0.58200000   0.58927978
  0.58200000   0.58927978
  0.58200000   0.58927979
  0.58200000   0.58927980
  0.58200000   0.58927980
  0.58200000   0.58927981
  0.58200000   0.58927982
  0.58200000   0.58927982
  0.58200000   0.58927983
  0.58200000   0.58927984
  0.58200000   0.58927984
  0.58200000   0.58927985
  0.58200000   0.58927986
  0.58200000   0.58927986
  0.58200000   0.58927987
  0.58200000   0.58927988
  0.58300000   0.58964078
  0.58300000   0.58964079
  0.58300000   0.58964079
  0.58300000   0.58964080
  0.58300000   0.58964081
  0.58300000   0.58964082
  0.58300000   0.58964082
  0.58300000   0.58964083
  0.58300000   0.58964084
  0.58300000   0.58964084
  0.58300000   0.58964085
  0.58300000   0.58964086
  0.58300000   0.58964086
  0.58300000   0.58964087
  0.58300000   0.58964088
  0.58300000   0.58964088
  0.58300000   0.58964089
  0.58300000   0.58964090
  0.58300000   0.58964090
  0.58300000   0.58964091
  0.58300000   0.58964092
  0.58300000   0.58964092
  0.58300000   0.58964093
  0.58300000   0.58964094
  0.58300000   0.58964094
  0.58300000   0.58964095
  0.58300000   0.58964096
  0.58300000   0.58964096
  0.58300000   0.58964097
  0.58300000   0.58964098
  0.58300000   0.58964098
  0.58300000   0.58964099
  0.58300000   0.58964100
  0.58300000   0.58964100
  0.58300000   0.58964101
  0.58300000   0.58964102
  0.58300000   0.58964102
  0.58300000   0.58964103
  0.58300000   0.58964104
  0.58300000   0.58964104
  0.58400000   0.59000125
  0.58400000   0.59000126
  0.58400000   0.59000127
  0.58400000   0.59000128
  0.58400000   0.59000128
  0.58400000   0.59000129
  0.58400000   0.59000130
  0.58400000   0.59000130
  0.58400000   0.59000131
  0.58400000   0.59000132
  0.58400000   0.59000132
  0.58400000   0.59000133
  0.58400000   0.59000134
  0.58400000   0.59000134
  0.58400000   0.59000135
  0.58400000   0.59000136
  0.58400000   0.59000136
  0.58400000   0.59000137
  0.58400000   0.59000138
  0.58400000   0.59000138
  0.58400000   0.59000139
  0.58400000   0.59000140
  0.58400000   0.59000140
  0.58400000   0.59000141
[truncated: 1,681,057 more chars]
