# Supplementary material for: A Fractional-Order Discrete Noninvertible Map of Cubic Type: Dynamics, Control, and Synchronization
Source: Hindawi journal article supplement (doi:10.1155/2020/2935192), 2020-05-22
Supplement: f1 [file 2935192.f1.zip › 2935192.f1/discretesanweiqIN1.dat]

  0.50000000  -0.81760232
  0.50000000  -0.81760686
  0.50000000  -0.81761139
  0.50000000  -0.81761591
  0.50000000  -0.81762043
  0.50000000  -0.81762494
  0.50000000  -0.81762944
  0.50000000  -0.81763393
  0.50000000  -0.81763842
  0.50000000  -0.81764290
  0.50000000  -0.81764738
  0.50000000  -0.81765185
  0.50000000  -0.81765631
  0.50000000  -0.81766076
  0.50000000  -0.81766521
  0.50000000  -0.81766964
  0.50000000  -0.81767408
  0.50000000  -0.81767850
  0.50000000  -0.81768292
  0.50000000  -0.81768733
  0.50000000  -0.81769174
  0.50000000  -0.81769614
  0.50000000  -0.81770053
  0.50000000  -0.81770491
  0.50000000  -0.81770929
  0.50000000  -0.81771366
  0.50000000  -0.81771802
  0.50000000  -0.81772238
  0.50000000  -0.81772673
  0.50000000  -0.81773108
  0.50000000  -0.81773541
  0.50000000  -0.81773974
  0.50000000  -0.81774407
  0.50000000  -0.81774838
  0.50000000  -0.81775270
  0.50000000  -0.81775700
  0.50000000  -0.81776130
  0.50000000  -0.81776559
  0.50000000  -0.81776987
  0.50000000  -0.81777415
  0.50050000  -0.81764070
  0.50050000  -0.81764523
  0.50050000  -0.81764974
  0.50050000  -0.81765425
  0.50050000  -0.81765875
  0.50050000  -0.81766324
  0.50050000  -0.81766773
  0.50050000  -0.81767221
  0.50050000  -0.81767668
  0.50050000  -0.81768115
  0.50050000  -0.81768560
  0.50050000  -0.81769005
  0.50050000  -0.81769450
  0.50050000  -0.81769894
  0.50050000  -0.81770337
  0.50050000  -0.81770779
  0.50050000  -0.81771221
  0.50050000  -0.81771662
  0.50050000  -0.81772102
  0.50050000  -0.81772541
  0.50050000  -0.81772980
  0.50050000  -0.81773419
  0.50050000  -0.81773856
  0.50050000  -0.81774293
  0.50050000  -0.81774729
  0.50050000  -0.81775165
  0.50050000  -0.81775600
  0.50050000  -0.81776034
  0.50050000  -0.81776467
  0.50050000  -0.81776900
  0.50050000  -0.81777332
  0.50050000  -0.81777764
  0.50050000  -0.81778195
  0.50050000  -0.81778625
  0.50050000  -0.81779054
  0.50050000  -0.81779483
  0.50050000  -0.81779911
  0.50050000  -0.81780339
  0.50050000  -0.81780766
  0.50050000  -0.81781192
  0.50000000  -0.81760232
  0.50000000  -0.81760686
  0.50000000  -0.81761139
  0.50000000  -0.81761591
  0.50000000  -0.81762043
  0.50000000  -0.81762494
  0.50000000  -0.81762944
  0.50000000  -0.81763393
  0.50000000  -0.81763842
  0.50000000  -0.81764290
  0.50000000  -0.81764738
  0.50000000  -0.81765185
  0.50000000  -0.81765631
  0.50000000  -0.81766076
  0.50000000  -0.81766521
  0.50000000  -0.81766964
  0.50000000  -0.81767408
  0.50000000  -0.81767850
  0.50000000  -0.81768292
  0.50000000  -0.81768733
  0.50000000  -0.81769174
  0.50000000  -0.81769614
  0.50000000  -0.81770053
  0.50000000  -0.81770491
  0.50000000  -0.81770929
  0.50000000  -0.81771366
  0.50000000  -0.81771802
  0.50000000  -0.81772238
  0.50000000  -0.81772673
  0.50000000  -0.81773108
  0.50000000  -0.81773541
  0.50000000  -0.81773974
  0.50000000  -0.81774407
  0.50000000  -0.81774838
  0.50000000  -0.81775270
  0.50000000  -0.81775700
  0.50000000  -0.81776130
  0.50000000  -0.81776559
  0.50000000  -0.81776987
  0.50000000  -0.81777415
  0.55000000  -0.82072694
  0.55000000  -0.82073009
  0.55000000  -0.82073323
  0.55000000  -0.82073636
  0.55000000  -0.82073950
  0.55000000  -0.82074262
  0.55000000  -0.82074574
  0.55000000  -0.82074886
  0.55000000  -0.82075197
  0.55000000  -0.82075508
  0.55000000  -0.82075818
  0.55000000  -0.82076128
  0.55000000  -0.82076437
  0.55000000  -0.82076745
  0.55000000  -0.82077053
  0.55000000  -0.82077361
  0.55000000  -0.82077668
  0.55000000  -0.82077975
  0.55000000  -0.82078281
  0.55000000  -0.82078587
  0.55000000  -0.82078892
  0.55000000  -0.82079196
  0.55000000  -0.82079501
  0.55000000  -0.82079804
  0.55000000  -0.82080108
  0.55000000  -0.82080410
  0.55000000  -0.82080713
  0.55000000  -0.82081014
  0.55000000  -0.82081316
  0.55000000  -0.82081617
  0.55000000  -0.82081917
  0.55000000  -0.82082217
  0.55000000  -0.82082516
  0.55000000  -0.82082815
  0.55000000  -0.82083114
  0.55000000  -0.82083412
  0.55000000  -0.82083709
  0.55000000  -0.82084006
  0.55000000  -0.82084303
  0.55000000  -0.82084599
  0.60000000  -0.82275253
  0.60000000  -0.82275467
  0.60000000  -0.82275681
  0.60000000  -0.82275895
  0.60000000  -0.82276108
  0.60000000  -0.82276321
  0.60000000  -0.82276534
  0.60000000  -0.82276746
  0.60000000  -0.82276958
  0.60000000  -0.82277170
  0.60000000  -0.82277381
  0.60000000  -0.82277592
  0.60000000  -0.82277802
  0.60000000  -0.82278012
  0.60000000  -0.82278222
  0.60000000  -0.82278431
  0.60000000  -0.82278640
  0.60000000  -0.82278849
  0.60000000  -0.82279058
  0.60000000  -0.82279266
  0.60000000  -0.82279473
  0.60000000  -0.82279681
  0.60000000  -0.82279888
  0.60000000  -0.82280094
  0.60000000  -0.82280301
  0.60000000  -0.82280507
  0.60000000  -0.82280713
  0.60000000  -0.82280918
  0.60000000  -0.82281123
  0.60000000  -0.82281328
  0.60000000  -0.82281532
  0.60000000  -0.82281736
  0.60000000  -0.82281940
  0.60000000  -0.82282143
  0.60000000  -0.82282346
  0.60000000  -0.82282549
  0.60000000  -0.82282751
  0.60000000  -0.82282953
  0.60000000  -0.82283155
  0.60000000  -0.82283356
  0.65000000  -0.82405807
  0.65000000  -0.82405950
  0.65000000  -0.82406092
  0.65000000  -0.82406235
  0.65000000  -0.82406377
  0.65000000  -0.82406519
  0.65000000  -0.82406661
  0.65000000  -0.82406802
  0.65000000  -0.82406943
  0.65000000  -0.82407084
  0.65000000  -0.82407225
  0.65000000  -0.82407365
  0.65000000  -0.82407506
  0.65000000  -0.82407646
  0.65000000  -0.82407785
  0.65000000  -0.82407925
  0.65000000  -0.82408064
  0.65000000  -0.82408203
  0.65000000  -0.82408342
  0.65000000  -0.82408481
  0.65000000  -0.82408619
  0.65000000  -0.82408757
  0.65000000  -0.82408895
  0.65000000  -0.82409032
  0.65000000  -0.82409170
  0.65000000  -0.82409307
  0.65000000  -0.82409444
  0.65000000  -0.82409581
  0.65000000  -0.82409717
  0.65000000  -0.82409853
  0.65000000  -0.82409989
  0.65000000  -0.82410125
  0.65000000  -0.82410261
  0.65000000  -0.82410396
  0.65000000  -0.82410531
  0.65000000  -0.82410666
  0.65000000  -0.82410801
  0.65000000  -0.82410935
  0.65000000  -0.82411069
  0.65000000  -0.82411203
  0.70000000  -0.82488914
  0.70000000  -0.82489361
  0.70000000  -0.82489600
  0.70000000  -0.82489277
  0.70000000  -0.82489405
  0.70000000  -0.82489893
  0.70000000  -0.82489778
  0.70000000  -0.82489566
  0.70000000  -0.82489996
  0.70000000  -0.82490241
  0.70000000  -0.82489930
  0.70000000  -0.82490044
  0.70000000  -0.82490524
  0.70000000  -0.82490423
  0.70000000  -0.82490211
  0.70000000  -0.82490623
  0.70000000  -0.82490874
  0.70000000  -0.82490574
  0.70000000  -0.82490675
  0.70000000  -0.82491147
  0.70000000  -0.82491059
  0.70000000  -0.82490847
  0.70000000  -0.82491244
  0.70000000  -0.82491498
  0.70000000  -0.82491211
  0.70000000  -0.82491299
  0.70000000  -0.82491762
  0.70000000  -0.82491688
  0.70000000  -0.82491476
  0.70000000  -0.82491857
  0.70000000  -0.82492115
  0.70000000  -0.82491839
  0.70000000  -0.82491916
  0.70000000  -0.82492370
  0.70000000  -0.82492309
  0.70000000  -0.82492097
  0.70000000  -0.82492463
  0.70000000  -0.82492725
  0.70000000  -0.82492460
  0.70000000  -0.82492526
  0.75000000  -0.80573272
  0.75000000  -0.63388794
  0.75000000  -0.86492538
  0.75000000  -0.90713980
  0.75000000  -0.70371865
  0.75000000  -0.72892671
  0.75000000  -0.95352689
  0.75000000  -0.78276235
  0.75000000  -0.63043197
  0.75000000  -0.88859539
  0.75000000  -0.88549195
  0.75000000  -0.68809280
  0.75000000  -0.76447768
  0.75000000  -0.95226370
  0.75000000  -0.76166255
  0.75000000  -0.63853948
  0.75000000  -0.91027291
  0.75000000  -0.86223447
  0.75000000  -0.67076247
  0.75000000  -0.79848640
  0.75000000  -0.94469521
  0.75000000  -0.74202883
  0.75000000  -0.65706593
  0.75000000  -0.92959646
  0.75000000  -0.83764638
  0.75000000  -0.65237909
  0.75000000  -0.82981275
  0.75000000  -0.93127557
  0.75000000  -0.72412934
  0.75000000  -0.68471380
  0.75000000  -0.94452250
  0.75000000  -0.81277151
  0.75000000  -0.63691431
  0.75000000  -0.85755674
  0.75000000  -0.91308279
  0.75000000  -0.70814046
  0.75000000  -0.71854740
  0.75000000  -0.95263822
  0.75000000  -0.78922577
  0.75000000  -0.63015943
  0.80000000  -0.89169871
  0.80000000  -0.87702147
  0.80000000  -0.66335588
  0.80000000  -0.77766058
  0.80000000  -0.97946876
  0.80000000  -0.70834934
  0.80000000  -0.55540367
  0.80000000  -0.96058289
  0.80000000  -0.80288567
  0.80000000  -0.57125282
  0.80000000  -0.87234826
  0.80000000  -0.91691059
  0.80000000  -0.66068682
  0.80000000  -0.70071361
  0.80000000  -1.00456256
  0.80000000  -0.72267928
  0.80000000  -0.48527333
  0.80000000  -0.91617819
  0.80000000  -0.83139336
  0.80000000  -0.64931736
  0.80000000  -0.85003094
  0.80000000  -0.93516576
  0.80000000  -0.67837267
  0.80000000  -0.66294776
  0.80000000  -1.00002533
  0.80000000  -0.74471659
  0.80000000  -0.49369515
  0.80000000  -0.90196662
  0.80000000  -0.85461854
  0.80000000  -0.66148747
  0.80000000  -0.81543417
  0.80000000  -0.95822442
  0.80000000  -0.69686785
  0.80000000  -0.60940704
  0.80000000  -0.98408525
  0.80000000  -0.77638786
  0.80000000  -0.52591416
  0.80000000  -0.88591603
  0.80000000  -0.88920103
  0.80000000  -0.66331355
  0.85000000  -0.81884358
  0.85000000  -0.66694567
  0.85000000  -0.88498805
  0.85000000  -0.91676404
  0.85000000  -0.62160332
  0.85000000  -0.69377690
  0.85000000  -1.05292956
  0.85000000  -0.64245362
  0.85000000  -0.28481452
  0.85000000  -0.87337738
  0.85000000  -0.70476717
  0.85000000  -0.77281391
  0.85000000  -0.97861490
  0.85000000  -0.70697045
  0.85000000  -0.52585235
  0.85000000  -0.99246248
  0.85000000  -0.76058364
  0.85000000  -0.46590035
  0.85000000  -0.91207498
  0.85000000  -0.84881858
  0.85000000  -0.62299081
  0.85000000  -0.83420925
  0.85000000  -0.97898199
  0.85000000  -0.62751086
  0.85000000  -0.52834843
  0.85000000  -1.03531387
  0.85000000  -0.67935614
  0.85000000  -0.34471649
  0.85000000  -0.90311836
  0.85000000  -0.74244370
  0.85000000  -0.70046559
  0.85000000  -0.97520401
  0.85000000  -0.77600466
  0.85000000  -0.51345923
  0.85000000  -0.91712770
  0.85000000  -0.87204841
  0.85000000  -0.59371910
  0.85000000  -0.78607431
  0.85000000  -1.01720946
  0.85000000  -0.62986242
  0.90000000  -1.09909311
  0.90000000  -0.56546082
  0.90000000  -0.01510618
  0.90000000  -0.70487540
  0.90000000  -0.39697609
  0.90000000  -0.97322805
  0.90000000  -0.70002646
  0.90000000  -0.50135210
  0.90000000  -1.03184900
  0.90000000  -0.68795448
  0.90000000  -0.30153064
  0.90000000  -0.92346392
  0.90000000  -0.67719695
  0.90000000  -0.65806582
  0.90000000  -1.06886954
  0.90000000  -0.62812074
  0.90000000  -0.15895589
  0.90000000  -0.83259104
  0.90000000  -0.56423045
  0.90000000  -0.86650113
  0.90000000  -0.96600776
  0.90000000  -0.56016110
  0.90000000  -0.53463077
  0.90000000  -1.09235245
  0.90000000  -0.57192212
  0.90000000  -0.04697781
  0.90000000  -0.73525778
  0.90000000  -0.43911172
  0.90000000  -0.96655942
  0.90000000  -0.75375223
  0.90000000  -0.50315971
  0.90000000  -0.97758928
  0.90000000  -0.79377952
  0.90000000  -0.45076899
  0.90000000  -0.89981800
  0.90000000  -0.88000035
  0.90000000  -0.59923141
  0.90000000  -0.77908780
  0.90000000  -1.05394684
  0.90000000  -0.56095080
  0.95000000   0.03659844
  0.95000000  -0.72315228
  0.95000000  -0.25558936
  0.95000000  -0.91492542
  0.95000000  -0.62479607
  0.95000000  -0.68060070
  0.95000000  -1.12848158
  0.95000000  -0.47811054
  0.95000000   0.24290529
  0.95000000  -0.52317266
  0.95000000   0.08396833
  0.95000000  -0.67705968
  0.95000000  -0.18611253
  0.95000000  -0.90062953
  0.95000000  -0.52450932
  0.95000000  -0.71532129
  0.95000000  -1.11051540
  0.95000000  -0.49261981
  0.95000000   0.13949705
  0.95000000  -0.61441023
  0.95000000  -0.10134957
  0.95000000  -0.85626232
  0.95000000  -0.42243215
  0.95000000  -0.79429278
  0.95000000  -0.99047792
  0.95000000  -0.64455317
  0.95000000  -0.42761109
  0.95000000  -1.09488909
  0.95000000  -0.52146240
  0.95000000   0.04818448
  0.95000000  -0.71027614
  0.95000000  -0.25073254
  0.95000000  -0.92702541
  0.95000000  -0.60620358
  0.95000000  -0.64775576
  0.95000000  -1.14402760
  0.95000000  -0.45856303
  0.95000000   0.33868485
  0.95000000  -0.44921963
  0.95000000   0.24550847
  1.00000000  -0.85934829
  1.00000000  -0.54073334
  1.00000000  -0.85791744
  1.00000000  -1.05692676
  1.00000000  -0.38066432
  1.00000000  -0.03695689
  1.00000000  -0.75116996
  1.00000000  -0.39214580
  1.00000000  -1.03534881
  1.00000000  -0.65928711
  1.00000000  -0.19020672
  1.00000000  -0.99414680
  1.00000000  -0.41433930
  1.00000000  -0.35157483
  1.00000000  -1.04776740
  1.00000000  -0.58049613
  1.00000000  -0.14016316
  1.00000000  -0.97728169
  1.00000000  -0.34400600
  1.00000000  -0.38471143
  1.00000000  -0.97863620
  1.00000000  -0.76040037
  1.00000000  -0.39570359
  1.00000000  -1.02266314
  1.00000000  -0.68970152
  1.00000000  -0.24040443
  1.00000000  -1.01074595
  1.00000000  -0.47757536
  1.00000000  -0.30217125
  1.00000000  -1.07188353
  1.00000000  -0.45241946
  1.00000000   0.00938258
  1.00000000  -0.78268412
  1.00000000  -0.26741551
  1.00000000  -0.90295333
  1.00000000  -0.70465866
  1.00000000  -0.70388346
  1.00000000  -1.11786835
  1.00000000  -0.51621427
  1.00000000   0.25419458
  0.50000000  -0.81760232
  0.50000000  -0.81760686
  0.50000000  -0.81761139
  0.50000000  -0.81761591
  0.50000000  -0.81762043
  0.50000000  -0.81762494
  0.50000000  -0.81762944
  0.50000000  -0.81763393
  0.50000000  -0.81763842
  0.50000000  -0.81764290
  0.50000000  -0.81764738
  0.50000000  -0.81765185
  0.50000000  -0.81765631
  0.50000000  -0.81766076
  0.50000000  -0.81766521
  0.50000000  -0.81766964
  0.50000000  -0.81767408
  0.50000000  -0.81767850
  0.50000000  -0.81768292
  0.50000000  -0.81768733
  0.50000000  -0.81769174
  0.50000000  -0.81769614
  0.50000000  -0.81770053
  0.50000000  -0.81770491
  0.50000000  -0.81770929
  0.50000000  -0.81771366
  0.50000000  -0.81771802
  0.50000000  -0.81772238
  0.50000000  -0.81772673
  0.50000000  -0.81773108
  0.50000000  -0.81773541
  0.50000000  -0.81773974
  0.50000000  -0.81774407
  0.50000000  -0.81774838
  0.50000000  -0.81775270
  0.50000000  -0.81775700
  0.50000000  -0.81776130
  0.50000000  -0.81776559
  0.50000000  -0.81776987
  0.50000000  -0.81777415
  0.50050000  -0.81764070
  0.50050000  -0.81764523
  0.50050000  -0.81764974
  0.50050000  -0.81765425
  0.50050000  -0.81765875
  0.50050000  -0.81766324
  0.50050000  -0.81766773
  0.50050000  -0.81767221
  0.50050000  -0.81767668
  0.50050000  -0.81768115
  0.50050000  -0.81768560
  0.50050000  -0.81769005
  0.50050000  -0.81769450
  0.50050000  -0.81769894
  0.50050000  -0.81770337
  0.50050000  -0.81770779
  0.50050000  -0.81771221
  0.50050000  -0.81771662
  0.50050000  -0.81772102
  0.50050000  -0.81772541
  0.50050000  -0.81772980
  0.50050000  -0.81773419
  0.50050000  -0.81773856
  0.50050000  -0.81774293
  0.50050000  -0.81774729
  0.50050000  -0.81775165
  0.50050000  -0.81775600
  0.50050000  -0.81776034
  0.50050000  -0.81776467
  0.50050000  -0.81776900
  0.50050000  -0.81777332
  0.50050000  -0.81777764
  0.50050000  -0.81778195
  0.50050000  -0.81778625
  0.50050000  -0.81779054
  0.50050000  -0.81779483
  0.50050000  -0.81779911
  0.50050000  -0.81780339
  0.50050000  -0.81780766
  0.50050000  -0.81781192
  0.50100000  -0.81767893
  0.50100000  -0.81768343
  0.50100000  -0.81768793
  0.50100000  -0.81769242
  0.50100000  -0.81769691
  0.50100000  -0.81770138
  0.50100000  -0.81770585
  0.50100000  -0.81771032
  0.50100000  -0.81771477
  0.50100000  -0.81771922
  0.50100000  -0.81772366
  0.50100000  -0.81772810
  0.50100000  -0.81773253
  0.50100000  -0.81773695
  0.50100000  -0.81774136
  0.50100000  -0.81774577
  0.50100000  -0.81775017
  0.50100000  -0.81775457
  0.50100000  -0.81775895
  0.50100000  -0.81776333
  0.50100000  -0.81776771
  0.50100000  -0.81777207
  0.50100000  -0.81777643
  0.50100000  -0.81778079
  0.50100000  -0.81778513
  0.50100000  -0.81778947
  0.50100000  -0.81779380
  0.50100000  -0.81779813
  0.50100000  -0.81780245
  0.50100000  -0.81780676
  0.50100000  -0.81781107
  0.50100000  -0.81781537
  0.50100000  -0.81781966
  0.50100000  -0.81782395
  0.50100000  -0.81782823
  0.50100000  -0.81783250
  0.50100000  -0.81783677
  0.50100000  -0.81784103
  0.50100000  -0.81784528
  0.50100000  -0.81784953
  0.50150000  -0.81771698
  0.50150000  -0.81772147
  0.50150000  -0.81772596
  0.50150000  -0.81773043
  0.50150000  -0.81773490
  0.50150000  -0.81773936
  0.50150000  -0.81774381
  0.50150000  -0.81774826
  0.50150000  -0.81775270
  0.50150000  -0.81775714
  0.50150000  -0.81776156
  0.50150000  -0.81776598
  0.50150000  -0.81777039
  0.50150000  -0.81777480
  0.50150000  -0.81777920
  0.50150000  -0.81778359
  0.50150000  -0.81778797
  0.50150000  -0.81779235
  0.50150000  -0.81779672
  0.50150000  -0.81780109
  0.50150000  -0.81780545
  0.50150000  -0.81780980
  0.50150000  -0.81781414
  0.50150000  -0.81781848
  0.50150000  -0.81782281
  0.50150000  -0.81782713
  0.50150000  -0.81783145
  0.50150000  -0.81783576
  0.50150000  -0.81784006
  0.50150000  -0.81784436
  0.50150000  -0.81784865
  0.50150000  -0.81785294
  0.50150000  -0.81785721
  0.50150000  -0.81786148
  0.50150000  -0.81786575
  0.50150000  -0.81787001
  0.50150000  -0.81787426
  0.50150000  -0.81787850
  0.50150000  -0.81788274
  0.50150000  -0.81788697
  0.50200000  -0.81775488
  0.50200000  -0.81775935
  0.50200000  -0.81776382
  0.50200000  -0.81776828
  0.50200000  -0.81777273
  0.50200000  -0.81777717
  0.50200000  -0.81778161
  0.50200000  -0.81778604
  0.50200000  -0.81779047
  0.50200000  -0.81779488
  0.50200000  -0.81779930
  0.50200000  -0.81780370
  0.50200000  -0.81780810
  0.50200000  -0.81781248
  0.50200000  -0.81781687
  0.50200000  -0.81782124
  0.50200000  -0.81782561
  0.50200000  -0.81782998
  0.50200000  -0.81783433
  0.50200000  -0.81783868
  0.50200000  -0.81784302
  0.50200000  -0.81784736
  0.50200000  -0.81785168
  0.50200000  -0.81785601
  0.50200000  -0.81786032
  0.50200000  -0.81786463
  0.50200000  -0.81786893
  0.50200000  -0.81787323
  0.50200000  -0.81787752
  0.50200000  -0.81788180
  0.50200000  -0.81788607
  0.50200000  -0.81789034
  0.50200000  -0.81789460
  0.50200000  -0.81789886
  0.50200000  -0.81790311
  0.50200000  -0.81790735
  0.50200000  -0.81791159
  0.50200000  -0.81791582
  0.50200000  -0.81792004
  0.50200000  -0.81792426
  0.50250000  -0.81779261
  0.50250000  -0.81779706
  0.50250000  -0.81780152
  0.50250000  -0.81780596
  0.50250000  -0.81781039
  0.50250000  -0.81781482
  0.50250000  -0.81781925
  0.50250000  -0.81782366
  0.50250000  -0.81782807
  0.50250000  -0.81783247
  0.50250000  -0.81783687
  0.50250000  -0.81784125
  0.50250000  -0.81784563
  0.50250000  -0.81785001
  0.50250000  -0.81785438
  0.50250000  -0.81785874
  0.50250000  -0.81786309
  0.50250000  -0.81786744
  0.50250000  -0.81787178
  0.50250000  -0.81787611
  0.50250000  -0.81788044
  0.50250000  -0.81788476
  0.50250000  -0.81788907
  0.50250000  -0.81789337
  0.50250000  -0.81789767
  0.50250000  -0.81790197
  0.50250000  -0.81790625
  0.50250000  -0.81791053
  0.50250000  -0.81791481
  0.50250000  -0.81791907
  0.50250000  -0.81792333
  0.50250000  -0.81792759
  0.50250000  -0.81793183
  0.50250000  -0.81793607
  0.50250000  -0.81794031
  0.50250000  -0.81794453
  0.50250000  -0.81794875
  0.50250000  -0.81795297
  0.50250000  -0.81795718
  0.50250000  -0.81796138
  0.50300000  -0.81783018
  0.50300000  -0.81783462
  0.50300000  -0.81783905
  0.50300000  -0.81784348
  0.50300000  -0.81784790
  0.50300000  -0.81785231
  0.50300000  -0.81785672
  0.50300000  -0.81786112
  0.50300000  -0.81786551
  0.50300000  -0.81786990
  0.50300000  -0.81787428
  0.50300000  -0.81787865
  0.50300000  -0.81788301
  0.50300000  -0.81788737
  0.50300000  -0.81789172
  0.50300000  -0.81789607
  0.50300000  -0.81790040
  0.50300000  -0.81790474
  0.50300000  -0.81790906
  0.50300000  -0.81791338
  0.50300000  -0.81791769
  0.50300000  -0.81792199
  0.50300000  -0.81792629
  0.50300000  -0.81793058
  0.50300000  -0.81793486
  0.50300000  -0.81793914
  0.50300000  -0.81794341
  0.50300000  -0.81794768
  0.50300000  -0.81795193
  0.50300000  -0.81795619
  0.50300000  -0.81796043
  0.50300000  -0.81796467
  0.50300000  -0.81796890
  0.50300000  -0.81797312
  0.50300000  -0.81797734
  0.50300000  -0.81798156
  0.50300000  -0.81798576
  0.50300000  -0.81798996
  0.50300000  -0.81799415
  0.50300000  -0.81799834
  0.50350000  -0.81786758
  0.50350000  -0.81787201
  0.50350000  -0.81787643
  0.50350000  -0.81788084
  0.50350000  -0.81788524
  0.50350000  -0.81788964
  0.50350000  -0.81789403
  0.50350000  -0.81789841
  0.50350000  -0.81790279
  0.50350000  -0.81790716
  0.50350000  -0.81791152
  0.50350000  -0.81791588
  0.50350000  -0.81792023
  0.50350000  -0.81792457
  0.50350000  -0.81792891
  0.50350000  -0.81793324
  0.50350000  -0.81793756
  0.50350000  -0.81794187
  0.50350000  -0.81794618
  0.50350000  -0.81795049
  0.50350000  -0.81795478
  0.50350000  -0.81795907
  0.50350000  -0.81796335
  0.50350000  -0.81796763
  0.50350000  -0.81797190
  0.50350000  -0.81797616
  0.50350000  -0.81798041
  0.50350000  -0.81798466
  0.50350000  -0.81798890
  0.50350000  -0.81799314
  0.50350000  -0.81799737
  0.50350000  -0.81800159
  0.50350000  -0.81800581
  0.50350000  -0.81801002
  0.50350000  -0.81801422
  0.50350000  -0.81801842
  0.50350000  -0.81802261
  0.50350000  -0.81802679
  0.50350000  -0.81803097
  0.50350000  -0.81803514
  0.50400000  -0.81790483
  0.50400000  -0.81790924
  0.50400000  -0.81791364
  0.50400000  -0.81791804
  0.50400000  -0.81792242
  0.50400000  -0.81792681
  0.50400000  -0.81793118
  0.50400000  -0.81793555
  0.50400000  -0.81793991
  0.50400000  -0.81794426
  0.50400000  -0.81794861
  0.50400000  -0.81795295
  0.50400000  -0.81795729
  0.50400000  -0.81796161
  0.50400000  -0.81796593
  0.50400000  -0.81797025
  0.50400000  -0.81797455
  0.50400000  -0.81797885
  0.50400000  -0.81798315
  0.50400000  -0.81798743
  0.50400000  -0.81799171
  0.50400000  -0.81799599
  0.50400000  -0.81800025
  0.50400000  -0.81800451
  0.50400000  -0.81800877
  0.50400000  -0.81801301
  0.50400000  -0.81801725
  0.50400000  -0.81802149
  0.50400000  -0.81802571
  0.50400000  -0.81802993
  0.50400000  -0.81803415
  0.50400000  -0.81803836
  0.50400000  -0.81804256
  0.50400000  -0.81804675
  0.50400000  -0.81805094
  0.50400000  -0.81805512
  0.50400000  -0.81805930
  0.50400000  -0.81806347
  0.50400000  -0.81806763
  0.50400000  -0.81807178
  0.50450000  -0.81794191
  0.50450000  -0.81794631
  0.50450000  -0.81795069
  0.50450000  -0.81795507
  0.50450000  -0.81795945
  0.50450000  -0.81796381
  0.50450000  -0.81796817
  0.50450000  -0.81797252
  0.50450000  -0.81797687
  0.50450000  -0.81798121
  0.50450000  -0.81798554
  0.50450000  -0.81798987
  0.50450000  -0.81799418
  0.50450000  -0.81799850
  0.50450000  -0.81800280
  0.50450000  -0.81800710
  0.50450000  -0.81801139
  0.50450000  -0.81801567
  0.50450000  -0.81801995
  0.50450000  -0.81802422
  0.50450000  -0.81802849
  0.50450000  -0.81803274
  0.50450000  -0.81803700
  0.50450000  -0.81804124
  0.50450000  -0.81804548
  0.50450000  -0.81804971
  0.50450000  -0.81805393
  0.50450000  -0.81805815
  0.50450000  -0.81806236
  0.50450000  -0.81806657
  0.50450000  -0.81807077
  0.50450000  -0.81807496
  0.50450000  -0.81807915
  0.50450000  -0.81808333
  0.50450000  -0.81808750
  0.50450000  -0.81809167
  0.50450000  -0.81809583
  0.50450000  -0.81809998
  0.50450000  -0.81810413
  0.50450000  -0.81810827
  0.50500000  -0.81797884
  0.50500000  -0.81798322
  0.50500000  -0.81798759
  0.50500000  -0.81799195
  0.50500000  -0.81799631
  0.50500000  -0.81800066
  0.50500000  -0.81800500
  0.50500000  -0.81800934
  0.50500000  -0.81801367
  0.50500000  -0.81801799
  0.50500000  -0.81802231
  0.50500000  -0.81802662
  0.50500000  -0.81803092
  0.50500000  -0.81803522
  0.50500000  -0.81803951
  0.50500000  -0.81804379
  0.50500000  -0.81804807
  0.50500000  -0.81805233
  0.50500000  -0.81805660
  0.50500000  -0.81806085
  0.50500000  -0.81806510
  0.50500000  -0.81806934
  0.50500000  -0.81807358
  0.50500000  -0.81807781
  0.50500000  -0.81808203
  0.50500000  -0.81808625
  0.50500000  -0.81809046
  0.50500000  -0.81809466
  0.50500000  -0.81809886
  0.50500000  -0.81810305
  0.50500000  -0.81810723
  0.50500000  -0.81811141
  0.50500000  -0.81811558
  0.50500000  -0.81811974
  0.50500000  -0.81812390
  0.50500000  -0.81812805
  0.50500000  -0.81813220
  0.50500000  -0.81813634
  0.50500000  -0.81814047
  0.50500000  -0.81814460
  0.50550000  -0.81801561
  0.50550000  -0.81801997
  0.50550000  -0.81802432
  0.50550000  -0.81802867
  0.50550000  -0.81803301
  0.50550000  -0.81803735
  0.50550000  -0.81804168
  0.50550000  -0.81804600
  0.50550000  -0.81805031
  0.50550000  -0.81805462
  0.50550000  -0.81805892
  0.50550000  -0.81806321
  0.50550000  -0.81806750
  0.50550000  -0.81807178
  0.50550000  -0.81807606
  0.50550000  -0.81808032
  0.50550000  -0.81808458
  0.50550000  -0.81808884
  0.50550000  -0.81809308
  0.50550000  -0.81809732
  0.50550000  -0.81810156
  0.50550000  -0.81810579
  0.50550000  -0.81811001
  0.50550000  -0.81811422
  0.50550000  -0.81811843
  0.50550000  -0.81812263
  0.50550000  -0.81812682
  0.50550000  -0.81813101
  0.50550000  -0.81813519
  0.50550000  -0.81813937
  0.50550000  -0.81814354
  0.50550000  -0.81814770
  0.50550000  -0.81815185
  0.50550000  -0.81815600
  0.50550000  -0.81816015
  0.50550000  -0.81816428
  0.50550000  -0.81816841
  0.50550000  -0.81817254
  0.50550000  -0.81817665
  0.50550000  -0.81818077
  0.50600000  -0.81805222
  0.50600000  -0.81805656
  0.50600000  -0.81806090
  0.50600000  -0.81806524
  0.50600000  -0.81806956
  0.50600000  -0.81807388
  0.50600000  -0.81807819
  0.50600000  -0.81808250
  0.50600000  -0.81808680
  0.50600000  -0.81809109
  0.50600000  -0.81809537
  0.50600000  -0.81809965
  0.50600000  -0.81810392
  0.50600000  -0.81810819
  0.50600000  -0.81811245
  0.50600000  -0.81811670
  0.50600000  -0.81812094
  0.50600000  -0.81812518
  0.50600000  -0.81812941
  0.50600000  -0.81813364
  0.50600000  -0.81813786
  0.50600000  -0.81814207
  0.50600000  -0.81814628
  0.50600000  -0.81815047
  0.50600000  -0.81815467
  0.50600000  -0.81815885
  0.50600000  -0.81816303
  0.50600000  -0.81816720
  0.50600000  -0.81817137
  0.50600000  -0.81817553
  0.50600000  -0.81817968
  0.50600000  -0.81818383
  0.50600000  -0.81818797
  0.50600000  -0.81819211
  0.50600000  -0.81819623
  0.50600000  -0.81820036
  0.50600000  -0.81820447
  0.50600000  -0.81820858
  0.50600000  -0.81821268
  0.50600000  -0.81821678
  0.50650000  -0.81808867
  0.50650000  -0.81809300
  0.50650000  -0.81809732
  0.50650000  -0.81810164
  0.50650000  -0.81810595
  0.50650000  -0.81811025
  0.50650000  -0.81811455
  0.50650000  -0.81811884
  0.50650000  -0.81812312
  0.50650000  -0.81812740
  0.50650000  -0.81813167
  0.50650000  -0.81813593
  0.50650000  -0.81814019
  0.50650000  -0.81814444
  0.50650000  -0.81814868
  0.50650000  -0.81815292
  0.50650000  -0.81815715
  0.50650000  -0.81816137
  0.50650000  -0.81816559
  0.50650000  -0.81816980
  0.50650000  -0.81817400
  0.50650000  -0.81817820
  0.50650000  -0.81818239
  0.50650000  -0.81818657
  0.50650000  -0.81819075
  0.50650000  -0.81819492
  0.50650000  -0.81819908
  0.50650000  -0.81820324
  0.50650000  -0.81820739
  0.50650000  -0.81821154
  0.50650000  -0.81821568
  0.50650000  -0.81821981
  0.50650000  -0.81822393
  0.50650000  -0.81822805
  0.50650000  -0.81823217
  0.50650000  -0.81823627
  0.50650000  -0.81824037
  0.50650000  -0.81824447
  0.50650000  -0.81824856
  0.50650000  -0.81825264
  0.50700000  -0.81812496
  0.50700000  -0.81812928
  0.50700000  -0.81813359
  0.50700000  -0.81813789
  0.50700000  -0.81814218
  0.50700000  -0.81814647
  0.50700000  -0.81815075
  0.50700000  -0.81815503
  0.50700000  -0.81815930
  0.50700000  -0.81816356
  0.50700000  -0.81816781
  0.50700000  -0.81817206
  0.50700000  -0.81817630
  0.50700000  -0.81818053
  0.50700000  -0.81818476
  0.50700000  -0.81818898
  0.50700000  -0.81819320
  0.50700000  -0.81819740
  0.50700000  -0.81820161
  0.50700000  -0.81820580
  0.50700000  -0.81820999
  0.50700000  -0.81821417
  0.50700000  -0.81821835
  0.50700000  -0.81822251
  0.50700000  -0.81822668
  0.50700000  -0.81823083
  0.50700000  -0.81823498
  0.50700000  -0.81823912
  0.50700000  -0.81824326
  0.50700000  -0.81824739
  0.50700000  -0.81825151
  0.50700000  -0.81825563
  0.50700000  -0.81825974
  0.50700000  -0.81826385
  0.50700000  -0.81826794
  0.50700000  -0.81827204
  0.50700000  -0.81827612
  0.50700000  -0.81828020
  0.50700000  -0.81828428
  0.50700000  -0.81828834
  0.50750000  -0.81816110
  0.50750000  -0.81816540
  0.50750000  -0.81816969
  0.50750000  -0.81817398
  0.50750000  -0.81817826
  0.50750000  -0.81818253
  0.50750000  -0.81818680
  0.50750000  -0.81819106
  0.50750000  -0.81819531
  0.50750000  -0.81819956
  0.50750000  -0.81820380
  0.50750000  -0.81820803
  0.50750000  -0.81821225
  0.50750000  -0.81821647
  0.50750000  -0.81822068
  0.50750000  -0.81822489
  0.50750000  -0.81822909
  0.50750000  -0.81823328
  0.50750000  -0.81823747
  0.50750000  -0.81824165
  0.50750000  -0.81824582
  0.50750000  -0.81824999
  0.50750000  -0.81825415
  0.50750000  -0.81825830
  0.50750000  -0.81826245
  0.50750000  -0.81826659
  0.50750000  -0.81827072
  0.50750000  -0.81827485
  0.50750000  -0.81827897
  0.50750000  -0.81828309
  0.50750000  -0.81828720
  0.50750000  -0.81829130
  0.50750000  -0.81829539
  0.50750000  -0.81829948
  0.50750000  -0.81830357
  0.50750000  -0.81830765
  0.50750000  -0.81831172
  0.50750000  -0.81831578
  0.50750000  -0.81831984
  0.50750000  -0.81832389
  0.50800000  -0.81819708
  0.50800000  -0.81820137
  0.50800000  -0.81820565
  0.50800000  -0.81820992
  0.50800000  -0.81821418
  0.50800000  -0.81821844
  0.50800000  -0.81822269
  0.50800000  -0.81822693
  0.50800000  -0.81823117
  0.50800000  -0.81823540
  0.50800000  -0.81823962
  0.50800000  -0.81824384
  0.50800000  -0.81824805
  0.50800000  -0.81825226
  0.50800000  -0.81825645
  0.50800000  -0.81826064
  0.50800000  -0.81826483
  0.50800000  -0.81826901
  0.50800000  -0.81827318
  0.50800000  -0.81827734
  0.50800000  -0.81828150
  0.50800000  -0.81828565
  0.50800000  -0.81828980
  0.50800000  -0.81829393
  0.50800000  -0.81829807
  0.50800000  -0.81830219
  0.50800000  -0.81830631
  0.50800000  -0.81831042
  0.50800000  -0.81831453
  0.50800000  -0.81831863
  0.50800000  -0.81832272
  0.50800000  -0.81832681
  0.50800000  -0.81833089
  0.50800000  -0.81833497
  0.50800000  -0.81833904
  0.50800000  -0.81834310
  0.50800000  -0.81834716
  0.50800000  -0.81835121
  0.50800000  -0.81835525
  0.50800000  -0.81835929
  0.50850000  -0.81823291
  0.50850000  -0.81823718
  0.50850000  -0.81824144
  0.50850000  -0.81824570
  0.50850000  -0.81824995
  0.50850000  -0.81825419
  0.50850000  -0.81825843
  0.50850000  -0.81826265
  0.50850000  -0.81826688
  0.50850000  -0.81827109
  0.50850000  -0.81827530
  0.50850000  -0.81827950
  0.50850000  -0.81828370
  0.50850000  -0.81828789
  0.50850000  -0.81829207
  0.50850000  -0.81829624
  0.50850000  -0.81830041
  0.50850000  -0.81830457
  0.50850000  -0.81830873
  0.50850000  -0.81831288
  0.50850000  -0.81831702
  0.50850000  -0.81832116
  0.50850000  -0.81832529
  0.50850000  -0.81832941
  0.50850000  -0.81833353
  0.50850000  -0.81833764
  0.50850000  -0.81834175
  0.50850000  -0.81834584
  0.50850000  -0.81834994
  0.50850000  -0.81835402
  0.50850000  -0.81835810
  0.50850000  -0.81836217
  0.50850000  -0.81836624
  0.50850000  -0.81837030
  0.50850000  -0.81837435
  0.50850000  -0.81837840
  0.50850000  -0.81838244
  0.50850000  -0.81838648
  0.50850000  -0.81839051
  0.50850000  -0.81839453
  0.50900000  -0.81826859
  0.50900000  -0.81827284
  0.50900000  -0.81827709
  0.50900000  -0.81828133
  0.50900000  -0.81828556
  0.50900000  -0.81828979
  0.50900000  -0.81829401
  0.50900000  -0.81829822
  0.50900000  -0.81830243
  0.50900000  -0.81830663
  0.50900000  -0.81831082
  0.50900000  -0.81831501
  0.50900000  -0.81831919
  0.50900000  -0.81832336
  0.50900000  -0.81832753
  0.50900000  -0.81833169
  0.50900000  -0.81833584
  0.50900000  -0.81833999
  0.50900000  -0.81834413
  0.50900000  -0.81834827
  0.50900000  -0.81835239
  0.50900000  -0.81835652
  0.50900000  -0.81836063
  0.50900000  -0.81836474
  0.50900000  -0.81836884
  0.50900000  -0.81837294
  0.50900000  -0.81837703
  0.50900000  -0.81838111
  0.50900000  -0.81838519
  0.50900000  -0.81838926
  0.50900000  -0.81839332
  0.50900000  -0.81839738
  0.50900000  -0.81840143
  0.50900000  -0.81840548
  0.50900000  -0.81840952
  0.50900000  -0.81841355
  0.50900000  -0.81841758
  0.50900000  -0.81842160
  0.50900000  -0.81842561
  0.50900000  -0.81842962
  0.50950000  -0.81830411
  0.50950000  -0.81830835
  0.50950000  -0.81831258
  0.50950000  -0.81831680
  0.50950000  -0.81832102
  0.50950000  -0.81832523
  0.50950000  -0.81832944
  0.50950000  -0.81833364
  0.50950000  -0.81833783
  0.50950000  -0.81834201
  0.50950000  -0.81834619
  0.50950000  -0.81835036
  0.50950000  -0.81835453
  0.50950000  -0.81835868
  0.50950000  -0.81836284
  0.50950000  -0.81836698
  0.50950000  -0.81837112
  0.50950000  -0.81837525
  0.50950000  -0.81837938
  0.50950000  -0.81838350
  0.50950000  -0.81838761
  0.50950000  -0.81839172
  0.50950000  -0.81839582
  0.50950000  -0.81839991
  0.50950000  -0.81840400
  0.50950000  -0.81840808
  0.50950000  -0.81841216
  0.50950000  -0.81841622
  0.50950000  -0.81842029
  0.50950000  -0.81842434
  0.50950000  -0.81842839
  0.50950000  -0.81843244
  0.50950000  -0.81843647
  0.50950000  -0.81844050
  0.50950000  -0.81844453
  0.50950000  -0.81844855
  0.50950000  -0.81845256
  0.50950000  -0.81845657
  0.50950000  -0.81846057
  0.50950000  -0.81846456
  0.51000000  -0.81833948
  0.51000000  -0.81834370
  0.51000000  -0.81834792
  0.51000000  -0.81835213
  0.51000000  -0.81835633
  0.51000000  -0.81836052
  0.51000000  -0.81836471
  0.51000000  -0.81836890
  0.51000000  -0.81837307
  0.51000000  -0.81837724
  0.51000000  -0.81838141
  0.51000000  -0.81838556
  0.51000000  -0.81838971
  0.51000000  -0.81839386
  0.51000000  -0.81839799
  0.51000000  -0.81840212
  0.51000000  -0.81840625
  0.51000000  -0.81841036
  0.51000000  -0.81841448
  0.51000000  -0.81841858
  0.51000000  -0.81842268
  0.51000000  -0.81842677
  0.51000000  -0.81843086
  0.51000000  -0.81843493
  0.51000000  -0.81843901
  0.51000000  -0.81844307
  0.51000000  -0.81844713
  0.51000000  -0.81845119
  0.51000000  -0.81845524
  0.51000000  -0.81845928
  0.51000000  -0.81846331
  0.51000000  -0.81846734
  0.51000000  -0.81847136
  0.51000000  -0.81847538
  0.51000000  -0.81847939
  0.51000000  -0.81848339
  0.51000000  -0.81848739
  0.51000000  -0.81849138
  0.51000000  -0.81849537
  0.51000000  -0.81849935
  0.51050000  -0.81837469
  0.51050000  -0.81837890
  0.51050000  -0.81838310
  0.51050000  -0.81838730
  0.51050000  -0.81839148
  0.51050000  -0.81839566
  0.51050000  -0.81839984
  0.51050000  -0.81840401
  0.51050000  -0.81840817
  0.51050000  -0.81841232
  0.51050000  -0.81841647
  0.51050000  -0.81842061
  0.51050000  -0.81842475
  0.51050000  -0.81842888
  0.51050000  -0.81843300
  0.51050000  -0.81843711
  0.51050000  -0.81844122
  0.51050000  -0.81844532
  0.51050000  -0.81844942
  0.51050000  -0.81845351
  0.51050000  -0.81845759
  0.51050000  -0.81846167
  0.51050000  -0.81846574
  0.51050000  -0.81846981
  0.51050000  -0.81847386
  0.51050000  -0.81847792
  0.51050000  -0.81848196
  0.51050000  -0.81848600
  0.51050000  -0.81849003
  0.51050000  -0.81849406
  0.51050000  -0.81849808
  0.51050000  -0.81850209
  0.51050000  -0.81850610
  0.51050000  -0.81851010
  0.51050000  -0.81851410
  0.51050000  -0.81851809
  0.51050000  -0.81852207
  0.51050000  -0.81852605
  0.51050000  -0.81853002
  0.51050000  -0.81853399
  0.51100000  -0.81840976
  0.51100000  -0.81841395
  0.51100000  -0.81841814
  0.51100000  -0.81842231
  0.51100000  -0.81842649
  0.51100000  -0.81843065
  0.51100000  -0.81843481
  0.51100000  -0.81843896
  0.51100000  -0.81844311
  0.51100000  -0.81844725
  0.51100000  -0.81845138
  0.51100000  -0.81845551
  0.51100000  -0.81845963
  0.51100000  -0.81846374
  0.51100000  -0.81846785
  0.51100000  -0.81847195
  0.51100000  -0.81847605
  0.51100000  -0.81848013
  0.51100000  -0.81848422
  0.51100000  -0.81848829
  0.51100000  -0.81849236
  0.51100000  -0.81849642
  0.51100000  -0.81850048
  0.51100000  -0.81850453
  0.51100000  -0.81850857
  0.51100000  -0.81851261
  0.51100000  -0.81851664
  0.51100000  -0.81852066
  0.51100000  -0.81852468
  0.51100000  -0.81852869
  0.51100000  -0.81853270
  0.51100000  -0.81853670
  0.51100000  -0.81854069
  0.51100000  -0.81854468
  0.51100000  -0.81854866
  0.51100000  -0.81855263
  0.51100000  -0.81855660
  0.51100000  -0.81856057
  0.51100000  -0.81856452
  0.51100000  -0.81856847
  0.51150000  -0.81844467
  0.51150000  -0.81844885
  0.51150000  -0.81845302
  0.51150000  -0.81845718
  0.51150000  -0.81846134
  0.51150000  -0.81846549
  0.51150000  -0.81846964
  0.51150000  -0.81847377
  0.51150000  -0.81847790
  0.51150000  -0.81848203
  0.51150000  -0.81848615
  0.51150000  -0.81849026
  0.51150000  -0.81849436
  0.51150000  -0.81849846
  0.51150000  -0.81850255
  0.51150000  -0.81850664
  0.51150000  -0.81851072
  0.51150000  -0.81851479
  0.51150000  -0.81851886
  0.51150000  -0.81852292
  0.51150000  -0.81852697
  0.51150000  -0.81853102
  0.51150000  -0.81853506
  0.51150000  -0.81853910
  0.51150000  -0.81854313
  0.51150000  -0.81854715
  0.51150000  -0.81855116
  0.51150000  -0.81855517
  0.51150000  -0.81855918
  0.51150000  -0.81856318
  0.51150000  -0.81856717
  0.51150000  -0.81857115
  0.51150000  -0.81857513
  0.51150000  -0.81857910
  0.51150000  -0.81858307
  0.51150000  -0.81858703
  0.51150000  -0.81859099
  0.51150000  -0.81859493
  0.51150000  -0.81859888
  0.51150000  -0.81860281
  0.51200000  -0.81847943
  0.51200000  -0.81848360
  0.51200000  -0.81848775
  0.51200000  -0.81849190
  0.51200000  -0.81849604
  0.51200000  -0.81850018
  0.51200000  -0.81850431
  0.51200000  -0.81850843
  0.51200000  -0.81851255
  0.51200000  -0.81851666
  0.51200000  -0.81852076
  0.51200000  -0.81852486
  0.51200000  -0.81852895
  0.51200000  -0.81853303
  0.51200000  -0.81853711
  0.51200000  -0.81854118
  0.51200000  -0.81854524
  0.51200000  -0.81854930
  0.51200000  -0.81855335
  0.51200000  -0.81855740
  0.51200000  -0.81856144
  0.51200000  -0.81856547
  0.51200000  -0.81856950
  0.51200000  -0.81857352
  0.51200000  -0.81857753
  0.51200000  -0.81858154
  0.51200000  -0.81858554
  0.51200000  -0.81858954
  0.51200000  -0.81859353
  0.51200000  -0.81859751
  0.51200000  -0.81860149
  0.51200000  -0.81860546
  0.51200000  -0.81860942
  0.51200000  -0.81861338
  0.51200000  -0.81861733
  0.51200000  -0.81862128
  0.51200000  -0.81862522
  0.51200000  -0.81862915
  0.51200000  -0.81863308
  0.51200000  -0.81863700
  0.51250000  -0.81851405
  0.51250000  -0.81851819
  0.51250000  -0.81852234
  0.51250000  -0.81852647
  0.51250000  -0.81853060
  0.51250000  -0.81853472
  0.51250000  -0.81853883
  0.51250000  -0.81854294
  0.51250000  -0.81854704
  0.51250000  -0.81855114
  0.51250000  -0.81855522
  0.51250000  -0.81855931
  0.51250000  -0.81856338
  0.51250000  -0.81856745
  0.51250000  -0.81857151
  0.51250000  -0.81857557
  0.51250000  -0.81857962
  0.51250000  -0.81858366
  0.51250000  -0.81858770
  0.51250000  -0.81859173
  0.51250000  -0.81859576
  0.51250000  -0.81859977
  0.51250000  -0.81860379
  0.51250000  -0.81860779
  0.51250000  -0.81861179
  0.51250000  -0.81861578
  0.51250000  -0.81861977
  0.51250000  -0.81862375
  0.51250000  -0.81862773
  0.51250000  -0.81863170
  0.51250000  -0.81863566
  0.51250000  -0.81863961
  0.51250000  -0.81864356
  0.51250000  -0.81864751
  0.51250000  -0.81865145
  0.51250000  -0.81865538
  0.51250000  -0.81865930
  0.51250000  -0.81866322
  0.51250000  -0.81866714
  0.51250000  -0.81867105
  0.51300000  -0.81854851
  0.51300000  -0.81855264
  0.51300000  -0.81855677
  0.51300000  -0.81856089
  0.51300000  -0.81856500
  0.51300000  -0.81856911
  0.51300000  -0.81857321
  0.51300000  -0.81857730
  0.51300000  -0.81858139
  0.51300000  -0.81858547
  0.51300000  -0.81858954
  0.51300000  -0.81859361
  0.51300000  -0.81859767
  0.51300000  -0.81860172
  0.51300000  -0.81860577
  0.51300000  -0.81860981
  0.51300000  -0.81861385
  0.51300000  -0.81861788
  0.51300000  -0.81862190
  0.51300000  -0.81862592
  0.51300000  -0.81862993
  0.51300000  -0.81863393
  0.51300000  -0.81863793
  0.51300000  -0.81864192
  0.51300000  -0.81864590
  0.51300000  -0.81864988
  0.51300000  -0.81865385
  0.51300000  -0.81865782
  0.51300000  -0.81866178
  0.51300000  -0.81866573
  0.51300000  -0.81866968
  0.51300000  -0.81867362
  0.51300000  -0.81867756
  0.51300000  -0.81868149
  0.51300000  -0.81868541
  0.51300000  -0.81868933
  0.51300000  -0.81869324
  0.51300000  -0.81869715
  0.51300000  -0.81870105
  0.51300000  -0.81870494
  0.51350000  -0.81858283
  0.51350000  -0.81858695
  0.51350000  -0.81859106
  0.51350000  -0.81859516
  0.51350000  -0.81859926
  0.51350000  -0.81860335
  0.51350000  -0.81860743
  0.51350000  -0.81861151
  0.51350000  -0.81861558
  0.51350000  -0.81861965
  0.51350000  -0.81862371
  0.51350000  -0.81862776
  0.51350000  -0.81863181
  0.51350000  -0.81863585
  0.51350000  -0.81863988
  0.51350000  -0.81864391
  0.51350000  -0.81864793
  0.51350000  -0.81865194
  0.51350000  -0.81865595
  0.51350000  -0.81865995
  0.51350000  -0.81866395
  0.51350000  -0.81866794
  0.51350000  -0.81867192
  0.51350000  -0.81867590
  0.51350000  -0.81867987
  0.51350000  -0.81868383
  0.51350000  -0.81868779
  0.51350000  -0.81869174
  0.51350000  -0.81869569
  0.51350000  -0.81869963
  0.51350000  -0.81870356
  0.51350000  -0.81870749
  0.51350000  -0.81871141
  0.51350000  -0.81871532
  0.51350000  -0.81871923
  0.51350000  -0.81872314
  0.51350000  -0.81872703
  0.51350000  -0.81873093
  0.51350000  -0.81873481
  0.51350000  -0.81873869
  0.51400000  -0.81861700
  0.51400000  -0.81862110
  0.51400000  -0.81862520
  0.51400000  -0.81862928
  0.51400000  -0.81863337
  0.51400000  -0.81863744
  0.51400000  -0.81864151
  0.51400000  -0.81864558
  0.51400000  -0.81864963
  0.51400000  -0.81865369
  0.51400000  -0.81865773
  0.51400000  -0.81866177
  0.51400000  -0.81866580
  0.51400000  -0.81866982
  0.51400000  -0.81867384
  0.51400000  -0.81867785
  0.51400000  -0.81868186
  0.51400000  -0.81868586
  0.51400000  -0.81868985
  0.51400000  -0.81869384
  0.51400000  -0.81869782
  0.51400000  -0.81870180
  0.51400000  -0.81870576
  0.51400000  -0.81870973
  0.51400000  -0.81871368
  0.51400000  -0.81871763
  0.51400000  -0.81872158
  0.51400000  -0.81872551
  0.51400000  -0.81872945
  0.51400000  -0.81873337
  0.51400000  -0.81873729
  0.51400000  -0.81874120
  0.51400000  -0.81874511
  0.51400000  -0.81874901
  0.51400000  -0.81875291
  0.51400000  -0.81875680
  0.51400000  -0.81876068
  0.51400000  -0.81876456
  0.51400000  -0.81876843
  0.51400000  -0.81877229
  0.51450000  -0.81865102
  0.51450000  -0.81865511
  0.51450000  -0.81865919
  0.51450000  -0.81866326
  0.51450000  -0.81866733
  0.51450000  -0.81867139
  0.51450000  -0.81867545
  0.51450000  -0.81867950
  0.51450000  -0.81868354
  0.51450000  -0.81868757
  0.51450000  -0.81869160
  0.51450000  -0.81869563
  0.51450000  -0.81869964
  0.51450000  -0.81870365
  0.51450000  -0.81870766
  0.51450000  -0.81871166
  0.51450000  -0.81871565
  0.51450000  -0.81871963
  0.51450000  -0.81872361
  0.51450000  -0.81872758
  0.51450000  -0.81873155
  0.51450000  -0.81873551
  0.51450000  -0.81873946
  0.51450000  -0.81874341
  0.51450000  -0.81874735
  0.51450000  -0.81875129
  0.51450000  -0.81875522
  0.51450000  -0.81875914
  0.51450000  -0.81876306
  0.51450000  -0.81876697
  0.51450000  -0.81877088
  0.51450000  -0.81877478
  0.51450000  -0.81877867
  0.51450000  -0.81878256
  0.51450000  -0.81878644
  0.51450000  -0.81879031
  0.51450000  -0.81879418
  0.51450000  -0.81879804
  0.51450000  -0.81880190
  0.51450000  -0.81880575
  0.51500000  -0.81868489
  0.51500000  -0.81868897
  0.51500000  -0.81869303
  0.51500000  -0.81869709
  0.51500000  -0.81870115
  0.51500000  -0.81870519
  0.51500000  -0.81870923
  0.51500000  -0.81871327
  0.51500000  -0.81871730
  0.51500000  -0.81872132
  0.51500000  -0.81872533
  0.51500000  -0.81872934
  0.51500000  -0.81873334
  0.51500000  -0.81873734
  0.51500000  -0.81874133
  0.51500000  -0.81874531
  0.51500000  -0.81874929
  0.51500000  -0.81875326
  0.51500000  -0.81875722
  0.51500000  -0.81876118
  0.51500000  -0.81876513
  0.51500000  -0.81876908
  0.51500000  -0.81877302
  0.51500000  -0.81877695
  0.51500000  -0.81878088
  0.51500000  -0.81878480
  0.51500000  -0.81878872
  0.51500000  -0.81879263
  0.51500000  -0.81879653
  0.51500000  -0.81880043
  0.51500000  -0.81880432
  0.51500000  -0.81880820
  0.51500000  -0.81881208
  0.51500000  -0.81881595
  0.51500000  -0.81881982
  0.51500000  -0.81882368
  0.51500000  -0.81882754
  0.51500000  -0.81883139
  0.51500000  -0.81883523
  0.51500000  -0.81883907
  0.51550000  -0.81871862
  0.51550000  -0.81872268
  0.51550000  -0.81872673
  0.51550000  -0.81873078
  0.51550000  -0.81873482
  0.51550000  -0.81873885
  0.51550000  -0.81874288
  0.51550000  -0.81874689
  0.51550000  -0.81875091
  0.51550000  -0.81875491
  0.51550000  -0.81875891
  0.51550000  -0.81876291
  0.51550000  -0.81876690
  0.51550000  -0.81877088
  0.51550000  -0.81877485
  0.51550000  -0.81877882
  0.51550000  -0.81878278
  0.51550000  -0.81878674
  0.51550000  -0.81879069
  0.51550000  -0.81879463
  0.51550000  -0.81879857
  0.51550000  -0.81880250
  0.51550000  -0.81880643
  0.51550000  -0.81881035
  0.51550000  -0.81881426
  0.51550000  -0.81881817
  0.51550000  -0.81882207
  0.51550000  -0.81882597
  0.51550000  -0.81882985
  0.51550000  -0.81883374
  0.51550000  -0.81883761
  0.51550000  -0.81884148
  0.51550000  -0.81884535
  0.51550000  -0.81884921
  0.51550000  -0.81885306
  0.51550000  -0.81885691
  0.51550000  -0.81886075
  0.51550000  -0.81886458
  0.51550000  -0.81886841
  0.51550000  -0.81887224
  0.51600000  -0.81875221
  0.51600000  -0.81875625
  0.51600000  -0.81876029
  0.51600000  -0.81876432
  0.51600000  -0.81876834
  0.51600000  -0.81877236
  0.51600000  -0.81877637
  0.51600000  -0.81878038
  0.51600000  -0.81878438
  0.51600000  -0.81878837
  0.51600000  -0.81879235
  0.51600000  -0.81879633
  0.51600000  -0.81880031
  0.51600000  -0.81880427
  0.51600000  -0.81880823
  0.51600000  -0.81881219
  0.51600000  -0.81881614
  0.51600000  -0.81882008
  0.51600000  -0.81882401
  0.51600000  -0.81882794
  0.51600000  -0.81883187
  0.51600000  -0.81883578
  0.51600000  -0.81883970
  0.51600000  -0.81884360
  0.51600000  -0.81884750
  0.51600000  -0.81885139
  0.51600000  -0.81885528
  0.51600000  -0.81885916
  0.51600000  -0.81886303
  0.51600000  -0.81886690
  0.51600000  -0.81887077
  0.51600000  -0.81887462
  0.51600000  -0.81887847
  0.51600000  -0.81888232
  0.51600000  -0.81888616
  0.51600000  -0.81888999
  0.51600000  -0.81889382
  0.51600000  -0.81889764
  0.51600000  -0.81890145
  0.51600000  -0.81890526
  0.51650000  -0.81878565
  0.51650000  -0.81878968
  0.51650000  -0.81879370
  0.51650000  -0.81879771
  0.51650000  -0.81880172
  0.51650000  -0.81880573
  0.51650000  -0.81880972
  0.51650000  -0.81881371
  0.51650000  -0.81881770
  0.51650000  -0.81882168
  0.51650000  -0.81882565
  0.51650000  -0.81882961
  0.51650000  -0.81883357
  0.51650000  -0.81883752
  0.51650000  -0.81884147
  0.51650000  -0.81884541
  0.51650000  -0.81884934
  0.51650000  -0.81885327
  0.51650000  -0.81885719
  0.51650000  -0.81886111
  0.51650000  -0.81886502
  0.51650000  -0.81886892
  0.51650000  -0.81887282
  0.51650000  -0.81887671
  0.51650000  -0.81888059
  0.51650000  -0.81888447
  0.51650000  -0.81888834
  0.51650000  -0.81889221
  0.51650000  -0.81889607
  0.51650000  -0.81889993
  0.51650000  -0.81890378
  0.51650000  -0.81890762
  0.51650000  -0.81891145
  0.51650000  -0.81891529
  0.51650000  -0.81891911
  0.51650000  -0.81892293
  0.51650000  -0.81892674
  0.51650000  -0.81893055
  0.51650000  -0.81893435
  0.51650000  -0.81893815
  0.51700000  -0.81881894
  0.51700000  -0.81882296
  0.51700000  -0.81882697
  0.51700000  -0.81883097
  0.51700000  -0.81883496
  0.51700000  -0.81883895
  0.51700000  -0.81884293
  0.51700000  -0.81884691
  0.51700000  -0.81885088
  0.51700000  -0.81885484
  0.51700000  -0.81885880
  0.51700000  -0.81886275
  0.51700000  -0.81886669
  0.51700000  -0.81887063
  0.51700000  -0.81887456
  0.51700000  -0.81887849
  0.51700000  -0.81888241
  0.51700000  -0.81888632
  0.51700000  -0.81889023
  0.51700000  -0.81889413
  0.51700000  -0.81889803
  0.51700000  -0.81890191
  0.51700000  -0.81890580
  0.51700000  -0.81890967
  0.51700000  -0.81891354
  0.51700000  -0.81891741
  0.51700000  -0.81892127
  0.51700000  -0.81892512
  0.51700000  -0.81892897
  0.51700000  -0.81893281
  0.51700000  -0.81893664
  0.51700000  -0.81894047
  0.51700000  -0.81894429
  0.51700000  -0.81894811
  0.51700000  -0.81895192
  0.51700000  -0.81895573
  0.51700000  -0.81895953
  0.51700000  -0.81896332
  0.51700000  -0.81896711
  0.51700000  -0.81897089
  0.51750000  -0.81885210
  0.51750000  -0.81885610
  0.51750000  -0.81886009
  0.51750000  -0.81886408
  0.51750000  -0.81886806
  0.51750000  -0.81887203
  0.51750000  -0.81887600
  0.51750000  -0.81887996
  0.51750000  -0.81888391
  0.51750000  -0.81888786
  0.51750000  -0.81889181
  0.51750000  -0.81889574
  0.51750000  -0.81889967
  0.51750000  -0.81890360
  0.51750000  -0.81890751
  0.51750000  -0.81891143
  0.51750000  -0.81891533
  0.51750000  -0.81891923
  0.51750000  -0.81892312
  0.51750000  -0.81892701
  0.51750000  -0.81893089
  0.51750000  -0.81893477
  0.51750000  -0.81893863
  0.51750000  -0.81894250
  0.51750000  -0.81894635
  0.51750000  -0.81895020
  0.51750000  -0.81895405
  0.51750000  -0.81895789
  0.51750000  -0.81896172
  0.51750000  -0.81896555
  0.51750000  -0.81896937
  0.51750000  -0.81897318
  0.51750000  -0.81897699
  0.51750000  -0.81898079
  0.51750000  -0.81898459
  0.51750000  -0.81898838
  0.51750000  -0.81899217
  0.51750000  -0.81899595
  0.51750000  -0.81899972
  0.51750000  -0.81900349
  0.51800000  -0.81888511
  0.51800000  -0.81888909
  0.51800000  -0.81889307
  0.51800000  -0.81889704
  0.51800000  -0.81890101
  0.51800000  -0.81890497
  0.51800000  -0.81890892
  0.51800000  -0.81891287
  0.51800000  -0.81891681
  0.51800000  -0.81892074
  0.51800000  -0.81892467
  0.51800000  -0.81892859
  0.51800000  -0.81893251
  0.51800000  -0.81893642
  0.51800000  -0.81894032
  0.51800000  -0.81894422
  0.51800000  -0.81894811
  0.51800000  -0.81895200
  0.51800000  -0.81895587
  0.51800000  -0.81895975
  0.51800000  -0.81896361
  0.51800000  -0.81896747
  0.51800000  -0.81897133
  0.51800000  -0.81897518
  0.51800000  -0.81897902
  0.51800000  -0.81898286
  0.51800000  -0.81898669
  0.51800000  -0.81899051
  0.51800000  -0.81899433
  0.51800000  -0.81899814
  0.51800000  -0.81900195
  0.51800000  -0.81900575
  0.51800000  -0.81900955
  0.51800000  -0.81901333
  0.51800000  -0.81901712
  0.51800000  -0.81902090
  0.51800000  -0.81902467
  0.51800000  -0.81902843
  0.51800000  -0.81903219
  0.51800000  -0.81903595
  0.51850000  -0.81891797
  0.51850000  -0.81892195
  0.51850000  -0.81892591
  0.51850000  -0.81892987
  0.51850000  -0.81893382
  0.51850000  -0.81893776
  0.51850000  -0.81894170
  0.51850000  -0.81894564
  0.51850000  -0.81894956
  0.51850000  -0.81895348
  0.51850000  -0.81895740
  0.51850000  -0.81896130
  0.51850000  -0.81896520
  0.51850000  -0.81896910
  0.51850000  -0.81897299
  0.51850000  -0.81897687
  0.51850000  -0.81898075
  0.51850000  -0.81898462
  0.51850000  -0.81898849
  0.51850000  -0.81899234
  0.51850000  -0.81899620
  0.51850000  -0.81900004
  0.51850000  -0.81900388
  0.51850000  -0.81900772
  0.51850000  -0.81901155
  0.51850000  -0.81901537
  0.51850000  -0.81901919
  0.51850000  -0.81902300
  0.51850000  -0.81902680
  0.51850000  -0.81903060
  0.51850000  -0.81903439
  0.51850000  -0.81903818
  0.51850000  -0.81904196
  0.51850000  -0.81904574
  0.51850000  -0.81904951
  0.51850000  -0.81905327
  0.51850000  -0.81905703
  0.51850000  -0.81906078
  0.51850000  -0.81906453
  0.51850000  -0.81906827
  0.51900000  -0.81895070
  0.51900000  -0.81895466
  0.51900000  -0.81895861
  0.51900000  -0.81896255
  0.51900000  -0.81896649
  0.51900000  -0.81897042
  0.51900000  -0.81897434
  0.51900000  -0.81897826
  0.51900000  -0.81898217
  0.51900000  -0.81898608
  0.51900000  -0.81898998
  0.51900000  -0.81899387
  0.51900000  -0.81899776
  0.51900000  -0.81900164
  0.51900000  -0.81900552
  0.51900000  -0.81900938
  0.51900000  -0.81901325
  0.51900000  -0.81901710
  0.51900000  -0.81902095
  0.51900000  -0.81902480
  0.51900000  -0.81902864
  0.51900000  -0.81903247
  0.51900000  -0.81903630
  0.51900000  -0.81904012
  0.51900000  -0.81904393
  0.51900000  -0.81904774
  0.51900000  -0.81905154
  0.51900000  -0.81905534
  0.51900000  -0.81905913
  0.51900000  -0.81906292
  0.51900000  -0.81906670
  0.51900000  -0.81907047
  0.51900000  -0.81907424
  0.51900000  -0.81907800
  0.51900000  -0.81908175
  0.51900000  -0.81908550
  0.51900000  -0.81908925
  0.51900000  -0.81909299
  0.51900000  -0.81909672
  0.51900000  -0.81910044
  0.51950000  -0.81898329
  0.51950000  -0.81898723
  0.51950000  -0.81899116
  0.51950000  -0.81899509
  0.51950000  -0.81899902
  0.51950000  -0.81900293
  0.51950000  -0.81900684
  0.51950000  -0.81901075
  0.51950000  -0.81901464
  0.51950000  -0.81901854
  0.51950000  -0.81902242
  0.51950000  -0.81902630
  0.51950000  -0.81903017
  0.51950000  -0.81903404
  0.51950000  -0.81903790
  0.51950000  -0.81904176
  0.51950000  -0.81904561
  0.51950000  -0.81904945
  0.51950000  -0.81905328
  0.51950000  -0.81905712
  0.51950000  -0.81906094
  0.51950000  -0.81906476
  0.51950000  -0.81906857
  0.51950000  -0.81907238
  0.51950000  -0.81907618
  0.51950000  -0.81907997
  0.51950000  -0.81908376
  0.51950000  -0.81908754
  0.51950000  -0.81909132
  0.51950000  -0.81909509
  0.51950000  -0.81909886
  0.51950000  -0.81910262
  0.51950000  -0.81910637
  0.51950000  -0.81911012
  0.51950000  -0.81911386
  0.51950000  -0.81911760
  0.51950000  -0.81912133
  0.51950000  -0.81912505
  0.51950000  -0.81912877
  0.51950000  -0.81913248
  0.52000000  -0.81901573
  0.52000000  -0.81901966
  0.52000000  -0.81902358
  0.52000000  -0.81902749
  0.52000000  -0.81903140
  0.52000000  -0.81903531
  0.52000000  -0.81903920
  0.52000000  -0.81904309
  0.52000000  -0.81904698
  0.52000000  -0.81905085
  0.52000000  -0.81905472
  0.52000000  -0.81905859
  0.52000000  -0.81906245
  0.52000000  -0.81906630
  0.52000000  -0.81907015
  0.52000000  -0.81907399
  0.52000000  -0.81907782
  0.52000000  -0.81908165
  0.52000000  -0.81908548
  0.52000000  -0.81908929
  0.52000000  -0.81909310
  0.52000000  -0.81909691
  0.52000000  -0.81910071
  0.52000000  -0.81910450
  0.52000000  -0.81910829
  0.52000000  -0.81911207
  0.52000000  -0.81911584
  0.52000000  -0.81911961
  0.52000000  -0.81912337
  0.52000000  -0.81912713
  0.52000000  -0.81913088
  0.52000000  -0.81913463
  0.52000000  -0.81913837
  0.52000000  -0.81914210
  0.52000000  -0.81914583
  0.52000000  -0.81914955
  0.52000000  -0.81915327
  0.52000000  -0.81915698
  0.52000000  -0.81916069
  0.52000000  -0.81916439
  0.52050000  -0.81904804
  0.52050000  -0.81905195
  0.52050000  -0.81905586
  0.52050000  -0.81905976
  0.52050000  -0.81906365
  0.52050000  -0.81906754
  0.52050000  -0.81907142
  0.52050000  -0.81907530
  0.52050000  -0.81907917
  0.52050000  -0.81908303
  0.52050000  -0.81908689
  0.52050000  -0.81909074
  0.52050000  -0.81909458
  0.52050000  -0.81909842
  0.52050000  -0.81910226
  0.52050000  -0.81910608
  0.52050000  -0.81910990
  0.52050000  -0.81911372
  0.52050000  -0.81911753
  0.52050000  -0.81912133
  0.52050000  -0.81912513
  0.52050000  -0.81912892
  0.52050000  -0.81913270
  0.52050000  -0.81913648
  0.52050000  -0.81914025
  0.52050000  -0.81914402
  0.52050000  -0.81914778
  0.52050000  -0.81915154
  0.52050000  -0.81915529
  0.52050000  -0.81915903
  0.52050000  -0.81916277
  0.52050000  -0.81916650
  0.52050000  -0.81917023
  0.52050000  -0.81917395
  0.52050000  -0.81917766
  0.52050000  -0.81918137
  0.52050000  -0.81918507
  0.52050000  -0.81918877
  0.52050000  -0.81919246
  0.52050000  -0.81919615
  0.52100000  -0.81908020
  0.52100000  -0.81908410
  0.52100000  -0.81908800
  0.52100000  -0.81909188
  0.52100000  -0.81909576
  0.52100000  -0.81909964
  0.52100000  -0.81910350
  0.52100000  -0.81910736
  0.52100000  -0.81911122
  0.52100000  -0.81911507
  0.52100000  -0.81911891
  0.52100000  -0.81912275
  0.52100000  -0.81912658
  0.52100000  -0.81913041
  0.52100000  -0.81913422
  0.52100000  -0.81913804
  0.52100000  -0.81914184
  0.52100000  -0.81914565
  0.52100000  -0.81914944
  0.52100000  -0.81915323
  0.52100000  -0.81915701
  0.52100000  -0.81916079
  0.52100000  -0.81916456
  0.52100000  -0.81916832
  0.52100000  -0.81917208
  0.52100000  -0.81917584
  0.52100000  -0.81917958
  0.52100000  -0.81918333
  0.52100000  -0.81918706
  0.52100000  -0.81919079
  0.52100000  -0.81919452
  0.52100000  -0.81919823
  0.52100000  -0.81920195
  0.52100000  -0.81920565
  0.52100000  -0.81920936
  0.52100000  -0.81921305
  0.52100000  -0.81921674
  0.52100000  -0.81922042
  0.52100000  -0.81922410
  0.52100000  -0.81922778
  0.52150000  -0.81911223
  0.52150000  -0.81911612
  0.52150000  -0.81911999
  0.52150000  -0.81912387
  0.52150000  -0.81912773
  0.52150000  -0.81913159
  0.52150000  -0.81913545
  0.52150000  -0.81913929
  0.52150000  -0.81914314
  0.52150000  -0.81914697
  0.52150000  -0.81915080
  0.52150000  -0.81915462
  0.52150000  -0.81915844
  0.52150000  -0.81916225
  0.52150000  -0.81916606
  0.52150000  -0.81916985
  0.52150000  -0.81917365
  0.52150000  -0.81917743
  0.52150000  -0.81918122
  0.52150000  -0.81918499
  0.52150000  -0.81918876
  0.52150000  -0.81919252
  0.52150000  -0.81919628
  0.52150000  -0.81920003
  0.52150000  -0.81920378
  0.52150000  -0.81920752
  0.52150000  -0.81921125
  0.52150000  -0.81921498
  0.52150000  -0.81921870
  0.52150000  -0.81922242
  0.52150000  -0.81922613
  0.52150000  -0.81922983
  0.52150000  -0.81923353
  0.52150000  -0.81923722
  0.52150000  -0.81924091
  0.52150000  -0.81924459
  0.52150000  -0.81924827
  0.52150000  -0.81925194
  0.52150000  -0.81925561
  0.52150000  -0.81925926
  0.52200000  -0.81914412
  0.52200000  -0.81914799
  0.52200000  -0.81915186
  0.52200000  -0.81915571
  0.52200000  -0.81915957
  0.52200000  -0.81916341
  0.52200000  -0.81916725
  0.52200000  -0.81917109
  0.52200000  -0.81917491
  0.52200000  -0.81917873
  0.52200000  -0.81918255
  0.52200000  -0.81918636
  0.52200000  -0.81919016
  0.52200000  -0.81919396
  0.52200000  -0.81919775
  0.52200000  -0.81920153
  0.52200000  -0.81920531
  0.52200000  -0.81920909
  0.52200000  -0.81921285
  0.52200000  -0.81921662
  0.52200000  -0.81922037
  0.52200000  -0.81922412
  0.52200000  -0.81922786
  0.52200000  -0.81923160
  0.52200000  -0.81923533
  0.52200000  -0.81923906
  0.52200000  -0.81924278
  0.52200000  -0.81924649
  0.52200000  -0.81925020
  0.52200000  -0.81925390
  0.52200000  -0.81925760
  0.52200000  -0.81926129
  0.52200000  -0.81926498
  0.52200000  -0.81926866
  0.52200000  -0.81927233
  0.52200000  -0.81927600
  0.52200000  -0.81927966
  0.52200000  -0.81928332
  0.52200000  -0.81928697
  0.52200000  -0.81929062
  0.52250000  -0.81917587
  0.52250000  -0.81917973
  0.52250000  -0.81918358
  0.52250000  -0.81918742
  0.52250000  -0.81919126
  0.52250000  -0.81919509
  0.52250000  -0.81919892
  0.52250000  -0.81920274
  0.52250000  -0.81920655
  0.52250000  -0.81921036
  0.52250000  -0.81921416
  0.52250000  -0.81921796
  0.52250000  -0.81922175
  0.52250000  -0.81922553
  0.52250000  -0.81922931
  0.52250000  -0.81923308
  0.52250000  -0.81923684
  0.52250000  -0.81924060
  0.52250000  -0.81924436
  0.52250000  -0.81924810
  0.52250000  -0.81925184
  0.52250000  -0.81925558
  0.52250000  -0.81925931
  0.52250000  -0.81926303
  0.52250000  -0.81926675
  0.52250000  -0.81927047
  0.52250000  -0.81927417
  0.52250000  -0.81927787
  0.52250000  -0.81928157
  0.52250000  -0.81928526
  0.52250000  -0.81928894
  0.52250000  -0.81929262
  0.52250000  -0.81929629
  0.52250000  -0.81929996
  0.52250000  -0.81930362
  0.52250000  -0.81930727
  0.52250000  -0.81931092
  0.52250000  -0.81931456
  0.52250000  -0.81931820
  0.52250000  -0.81932184
  0.52300000  -0.81920749
  0.52300000  -0.81921133
  0.52300000  -0.81921517
  0.52300000  -0.81921900
  0.52300000  -0.81922282
  0.52300000  -0.81922664
  0.52300000  -0.81923045
  0.52300000  -0.81923426
  0.52300000  -0.81923806
  0.52300000  -0.81924185
  0.52300000  -0.81924564
  0.52300000  -0.81924942
  0.52300000  -0.81925319
  0.52300000  -0.81925696
  0.52300000  -0.81926073
  0.52300000  -0.81926448
  0.52300000  -0.81926824
  0.52300000  -0.81927198
  0.52300000  -0.81927572
  0.52300000  -0.81927946
  0.52300000  -0.81928318
  0.52300000  -0.81928691
  0.52300000  -0.81929062
  0.52300000  -0.81929433
  0.52300000  -0.81929804
  0.52300000  -0.81930174
  0.52300000  -0.81930543
  0.52300000  -0.81930912
  0.52300000  -0.81931280
  0.52300000  -0.81931647
  0.52300000  -0.81932014
  0.52300000  -0.81932381
  0.52300000  -0.81932747
  0.52300000  -0.81933112
  0.52300000  -0.81933477
  0.52300000  -0.81933841
  0.52300000  -0.81934204
  0.52300000  -0.81934567
  0.52300000  -0.81934930
  0.52300000  -0.81935292
  0.52350000  -0.81923897
  0.52350000  -0.81924280
  0.52350000  -0.81924662
  0.52350000  -0.81925044
  0.52350000  -0.81925425
  0.52350000  -0.81925805
  0.52350000  -0.81926185
  0.52350000  -0.81926564
  0.52350000  -0.81926943
  0.52350000  -0.81927320
  0.52350000  -0.81927698
  0.52350000  -0.81928075
  0.52350000  -0.81928451
  0.52350000  -0.81928826
  0.52350000  -0.81929201
  0.52350000  -0.81929576
  0.52350000  -0.81929949
  0.52350000  -0.81930323
  0.52350000  -0.81930695
  0.52350000  -0.81931067
  0.52350000  -0.81931439
  0.52350000  -0.81931810
  0.52350000  -0.81932180
  0.52350000  -0.81932549
  0.52350000  -0.81932919
  0.52350000  -0.81933287
  0.52350000  -0.81933655
  0.52350000  -0.81934022
  0.52350000  -0.81934389
  0.52350000  -0.81934755
  0.52350000  -0.81935121
  0.52350000  -0.81935486
  0.52350000  -0.81935851
  0.52350000  -0.81936215
  0.52350000  -0.81936578
  0.52350000  -0.81936941
  0.52350000  -0.81937303
  0.52350000  -0.81937665
  0.52350000  -0.81938026
  0.52350000  -0.81938387
  0.52400000  -0.81927031
  0.52400000  -0.81927413
  0.52400000  -0.81927794
  0.52400000  -0.81928174
  0.52400000  -0.81928554
  0.52400000  -0.81928932
  0.52400000  -0.81929311
  0.52400000  -0.81929689
  0.52400000  -0.81930066
  0.52400000  -0.81930442
  0.52400000  -0.81930818
  0.52400000  -0.81931194
  0.52400000  -0.81931569
  0.52400000  -0.81931943
  0.52400000  -0.81932316
  0.52400000  -0.81932689
  0.52400000  -0.81933062
  0.52400000  -0.81933434
  0.52400000  -0.81933805
  0.52400000  -0.81934176
  0.52400000  -0.81934546
  0.52400000  -0.81934915
  0.52400000  -0.81935284
  0.52400000  -0.81935652
  0.52400000  -0.81936020
  0.52400000  -0.81936387
  0.52400000  -0.81936754
  0.52400000  -0.81937120
  0.52400000  -0.81937485
  0.52400000  -0.81937850
  0.52400000  -0.81938215
  0.52400000  -0.81938578
  0.52400000  -0.81938941
  0.52400000  -0.81939304
  0.52400000  -0.81939666
  0.52400000  -0.81940028
  0.52400000  -0.81940389
  0.52400000  -0.81940749
  0.52400000  -0.81941109
  0.52400000  -0.81941468
  0.52450000  -0.81930152
  0.52450000  -0.81930532
  0.52450000  -0.81930912
  0.52450000  -0.81931291
  0.52450000  -0.81931669
  0.52450000  -0.81932046
  0.52450000  -0.81932423
  0.52450000  -0.81932800
  0.52450000  -0.81933176
  0.52450000  -0.81933551
  0.52450000  -0.81933925
  0.52450000  -0.81934300
  0.52450000  -0.81934673
  0.52450000  -0.81935046
  0.52450000  -0.81935418
  0.52450000  -0.81935790
  0.52450000  -0.81936161
  0.52450000  -0.81936531
  0.52450000  -0.81936901
  0.52450000  -0.81937270
  0.52450000  -0.81937639
  0.52450000  -0.81938007
  0.52450000  -0.81938375
  0.52450000  -0.81938742
  0.52450000  -0.81939108
  0.52450000  -0.81939474
  0.52450000  -0.81939839
  0.52450000  -0.81940204
  0.52450000  -0.81940568
  0.52450000  -0.81940932
  0.52450000  -0.81941295
  0.52450000  -0.81941657
  0.52450000  -0.81942019
  0.52450000  -0.81942380
  0.52450000  -0.81942741
  0.52450000  -0.81943101
  0.52450000  -0.81943461
  0.52450000  -0.81943820
  0.52450000  -0.81944178
  0.52450000  -0.81944536
  0.52500000  -0.81933260
  0.52500000  -0.81933639
  0.52500000  -0.81934017
  0.52500000  -0.81934394
  0.52500000  -0.81934771
  0.52500000  -0.81935147
  0.52500000  -0.81935523
  0.52500000  -0.81935898
  0.52500000  -0.81936272
  0.52500000  -0.81936646
  0.52500000  -0.81937019
  0.52500000  -0.81937392
  0.52500000  -0.81937764
  0.52500000  -0.81938135
  0.52500000  -0.81938506
  0.52500000  -0.81938876
  0.52500000  -0.81939246
  0.52500000  -0.81939615
  0.52500000  -0.81939984
  0.52500000  -0.81940352
  0.52500000  -0.81940719
  0.52500000  -0.81941086
  0.52500000  -0.81941452
  0.52500000  -0.81941818
  0.52500000  -0.81942183
  0.52500000  -0.81942547
  0.52500000  -0.81942911
  0.52500000  -0.81943275
  0.52500000  -0.81943637
  0.52500000  -0.81944000
  0.52500000  -0.81944361
  0.52500000  -0.81944722
  0.52500000  -0.81945083
  0.52500000  -0.81945443
  0.52500000  -0.81945802
  0.52500000  -0.81946161
  0.52500000  -0.81946519
  0.52500000  -0.81946877
  0.52500000  -0.81947234
  0.52500000  -0.81947591
  0.52550000  -0.81936354
  0.52550000  -0.81936731
  0.52550000  -0.81937108
  0.52550000  -0.81937484
  0.52550000  -0.81937859
  0.52550000  -0.81938234
  0.52550000  -0.81938608
  0.52550000  -0.81938982
  0.52550000  -0.81939355
  0.52550000  -0.81939728
  0.52550000  -0.81940100
  0.52550000  -0.81940471
  0.52550000  -0.81940842
  0.52550000  -0.81941212
  0.52550000  -0.81941581
  0.52550000  -0.81941950
  0.52550000  -0.81942318
  0.52550000  -0.81942686
  0.52550000  -0.81943053
  0.52550000  -0.81943420
  0.52550000  -0.81943786
  0.52550000  -0.81944151
  0.52550000  -0.81944516
  0.52550000  -0.81944881
  0.52550000  -0.81945244
  0.52550000  -0.81945607
  0.52550000  -0.81945970
  0.52550000  -0.81946332
  0.52550000  -0.81946694
  0.52550000  -0.81947054
  0.52550000  -0.81947415
  0.52550000  -0.81947774
  0.52550000  -0.81948134
  0.52550000  -0.81948492
  0.52550000  -0.81948850
  0.52550000  -0.81949208
  0.52550000  -0.81949565
  0.52550000  -0.81949921
  0.52550000  -0.81950277
  0.52550000  -0.81950633
  0.52600000  -0.81939435
  0.52600000  -0.81939811
  0.52600000  -0.81940186
  0.52600000  -0.81940561
  0.52600000  -0.81940935
  0.52600000  -0.81941308
  0.52600000  -0.81941681
  0.52600000  -0.81942053
  0.52600000  -0.81942425
  0.52600000  -0.81942796
  0.52600000  -0.81943167
  0.52600000  -0.81943537
  0.52600000  -0.81943906
  0.52600000  -0.81944275
  0.52600000  -0.81944643
  0.52600000  -0.81945010
  0.52600000  -0.81945377
  0.52600000  -0.81945744
  0.52600000  -0.81946110
  0.52600000  -0.81946475
  0.52600000  -0.81946840
  0.52600000  -0.81947204
  0.52600000  -0.81947567
  0.52600000  -0.81947930
  0.52600000  -0.81948293
  0.52600000  -0.81948654
  0.52600000  -0.81949016
  0.52600000  -0.81949376
  0.52600000  -0.81949736
  0.52600000  -0.81950096
  0.52600000  -0.81950455
  0.52600000  -0.81950813
  0.52600000  -0.81951171
  0.52600000  -0.81951529
  0.52600000  -0.81951885
  0.52600000  -0.81952242
  0.52600000  -0.81952597
  0.52600000  -0.81952952
  0.52600000  -0.81953307
  0.52600000  -0.81953661
  0.52650000  -0.81942502
  0.52650000  -0.81942877
  0.52650000  -0.81943251
  0.52650000  -0.81943624
  0.52650000  -0.81943997
  0.52650000  -0.81944369
  0.52650000  -0.81944740
  0.52650000  -0.81945111
  0.52650000  -0.81945482
  0.52650000  -0.81945851
  0.52650000  -0.81946220
  0.52650000  -0.81946589
  0.52650000  -0.81946957
  0.52650000  -0.81947324
  0.52650000  -0.81947691
  0.52650000  -0.81948057
  0.52650000  -0.81948423
  0.52650000  -0.81948788
  0.52650000  -0.81949153
  0.52650000  -0.81949517
  0.52650000  -0.81949880
  0.52650000  -0.81950243
  0.52650000  -0.81950605
  0.52650000  -0.81950967
  0.52650000  -0.81951328
  0.52650000  -0.81951688
  0.52650000  -0.81952048
  0.52650000  -0.81952407
  0.52650000  -0.81952766
  0.52650000  -0.81953124
  0.52650000  -0.81953482
  0.52650000  -0.81953839
  0.52650000  -0.81954196
  0.52650000  -0.81954552
  0.52650000  -0.81954907
  0.52650000  -0.81955262
  0.52650000  -0.81955617
  0.52650000  -0.81955970
  0.52650000  -0.81956324
  0.52650000  -0.81956676
  0.52700000  -0.81945557
  0.52700000  -0.81945930
  0.52700000  -0.81946302
  0.52700000  -0.81946674
  0.52700000  -0.81947045
  0.52700000  -0.81947416
  0.52700000  -0.81947786
  0.52700000  -0.81948156
  0.52700000  -0.81948525
  0.52700000  -0.81948893
  0.52700000  -0.81949261
  0.52700000  -0.81949628
  0.52700000  -0.81949995
  0.52700000  -0.81950361
  0.52700000  -0.81950726
  0.52700000  -0.81951091
  0.52700000  -0.81951456
  0.52700000  -0.81951819
  0.52700000  -0.81952183
  0.52700000  -0.81952545
  0.52700000  -0.81952907
  0.52700000  -0.81953269
  0.52700000  -0.81953629
  0.52700000  -0.81953990
  0.52700000  -0.81954350
  0.52700000  -0.81954709
  0.52700000  -0.81955067
  0.52700000  -0.81955425
  0.52700000  -0.81955783
  0.52700000  -0.81956140
  0.52700000  -0.81956496
  0.52700000  -0.81956852
  0.52700000  -0.81957207
  0.52700000  -0.81957562
  0.52700000  -0.81957916
  0.52700000  -0.81958270
  0.52700000  -0.81958623
  0.52700000  -0.81958975
  0.52700000  -0.81959327
  0.52700000  -0.81959679
  0.52750000  -0.81948598
  0.52750000  -0.81948969
  0.52750000  -0.81949341
  0.52750000  -0.81949711
  0.52750000  -0.81950081
  0.52750000  -0.81950451
  0.52750000  -0.81950819
  0.52750000  -0.81951188
  0.52750000  -0.81951555
  0.52750000  -0.81951922
  0.52750000  -0.81952289
  0.52750000  -0.81952655
  0.52750000  -0.81953020
  0.52750000  -0.81953385
  0.52750000  -0.81953749
  0.52750000  -0.81954112
  0.52750000  -0.81954475
  0.52750000  -0.81954838
  0.52750000  -0.81955199
  0.52750000  -0.81955561
  0.52750000  -0.81955921
  0.52750000  -0.81956281
  0.52750000  -0.81956641
  0.52750000  -0.81957000
  0.52750000  -0.81957358
  0.52750000  -0.81957716
  0.52750000  -0.81958074
  0.52750000  -0.81958430
  0.52750000  -0.81958786
  0.52750000  -0.81959142
  0.52750000  -0.81959497
  0.52750000  -0.81959852
  0.52750000  -0.81960206
  0.52750000  -0.81960559
  0.52750000  -0.81960912
  0.52750000  -0.81961264
  0.52750000  -0.81961616
  0.52750000  -0.81961967
  0.52750000  -0.81962318
  0.52750000  -0.81962668
  0.52800000  -0.81951626
  0.52800000  -0.81951996
  0.52800000  -0.81952366
  0.52800000  -0.81952735
  0.52800000  -0.81953104
  0.52800000  -0.81953472
  0.52800000  -0.81953839
  0.52800000  -0.81954206
  0.52800000  -0.81954572
  0.52800000  -0.81954938
  0.52800000  -0.81955303
  0.52800000  -0.81955668
  0.52800000  -0.81956032
  0.52800000  -0.81956395
  0.52800000  -0.81956758
  0.52800000  -0.81957120
  0.52800000  -0.81957482
  0.52800000  -0.81957843
  0.52800000  -0.81958203
  0.52800000  -0.81958563
  0.52800000  -0.81958923
  0.52800000  -0.81959281
  0.52800000  -0.81959640
  0.52800000  -0.81959997
  0.52800000  -0.81960354
  0.52800000  -0.81960711
  0.52800000  -0.81961067
  0.52800000  -0.81961422
  0.52800000  -0.81961777
  0.52800000  -0.81962131
  0.52800000  -0.81962485
  0.52800000  -0.81962838
  0.52800000  -0.81963191
  0.52800000  -0.81963543
  0.52800000  -0.81963895
  0.52800000  -0.81964246
  0.52800000  -0.81964596
  0.52800000  -0.81964946
  0.52800000  -0.81965296
  0.52800000  -0.81965644
  0.52850000  -0.81954641
  0.52850000  -0.81955010
  0.52850000  -0.81955378
  0.52850000  -0.81955746
  0.52850000  -0.81956113
  0.52850000  -0.81956480
  0.52850000  -0.81956846
  0.52850000  -0.81957212
  0.52850000  -0.81957577
  0.52850000  -0.81957941
  0.52850000  -0.81958305
  0.52850000  -0.81958668
  0.52850000  -0.81959030
  0.52850000  -0.81959393
  0.52850000  -0.81959754
  0.52850000  -0.81960115
  0.52850000  -0.81960475
  0.52850000  -0.81960835
  0.52850000  -0.81961194
  0.52850000  -0.81961553
  0.52850000  -0.81961911
  0.52850000  -0.81962268
  0.52850000  -0.81962625
  0.52850000  -0.81962981
  0.52850000  -0.81963337
  0.52850000  -0.81963693
  0.52850000  -0.81964047
  0.52850000  -0.81964401
  0.52850000  -0.81964755
  0.52850000  -0.81965108
  0.52850000  -0.81965460
  0.52850000  -0.81965812
  0.52850000  -0.81966164
  0.52850000  -0.81966514
  0.52850000  -0.81966865
  0.52850000  -0.81967214
  0.52850000  -0.81967564
  0.52850000  -0.81967912
  0.52850000  -0.81968260
  0.52850000  -0.81968608
  0.52900000  -0.81957643
  0.52900000  -0.81958010
  0.52900000  -0.81958377
  0.52900000  -0.81958744
  0.52900000  -0.81959110
  0.52900000  -0.81959475
  0.52900000  -0.81959840
  0.52900000  -0.81960204
  0.52900000  -0.81960568
  0.52900000  -0.81960931
  0.52900000  -0.81961293
  0.52900000  -0.81961655
  0.52900000  -0.81962016
  0.52900000  -0.81962377
  0.52900000  -0.81962737
  0.52900000  -0.81963097
  0.52900000  -0.81963456
  0.52900000  -0.81963814
  0.52900000  -0.81964172
  0.52900000  -0.81964529
  0.52900000  -0.81964886
  0.52900000  -0.81965242
  0.52900000  -0.81965598
  0.52900000  -0.81965953
  0.52900000  -0.81966307
  0.52900000  -0.81966661
  0.52900000  -0.81967015
  0.52900000  -0.81967367
  0.52900000  -0.81967720
  0.52900000  -0.81968071
  0.52900000  -0.81968423
  0.52900000  -0.81968773
  0.52900000  -0.81969123
  0.52900000  -0.81969473
  0.52900000  -0.81969822
  0.52900000  -0.81970170
  0.52900000  -0.81970518
  0.52900000  -0.81970865
  0.52900000  -0.81971212
  0.52900000  -0.81971559
  0.52950000  -0.81960632
  0.52950000  -0.81960998
  0.52950000  -0.81961364
  0.52950000  -0.81961729
  0.52950000  -0.81962094
  0.52950000  -0.81962458
  0.52950000  -0.81962821
  0.52950000  -0.81963184
  0.52950000  -0.81963546
  0.52950000  -0.81963908
  0.52950000  -0.81964269
  0.52950000  -0.81964629
  0.52950000  -0.81964989
  0.52950000  -0.81965349
  0.52950000  -0.81965708
  0.52950000  -0.81966066
  0.52950000  -0.81966423
  0.52950000  -0.81966781
  0.52950000  -0.81967137
  0.52950000  -0.81967493
  0.52950000  -0.81967849
  0.52950000  -0.81968203
  0.52950000  -0.81968558
  0.52950000  -0.81968911
  0.52950000  -0.81969265
  0.52950000  -0.81969617
  0.52950000  -0.81969969
  0.52950000  -0.81970321
  0.52950000  -0.81970672
  0.52950000  -0.81971022
  0.52950000  -0.81971372
  0.52950000  -0.81971721
  0.52950000  -0.81972070
  0.52950000  -0.81972418
  0.52950000  -0.81972766
  0.52950000  -0.81973113
  0.52950000  -0.81973460
  0.52950000  -0.81973806
  0.52950000  -0.81974151
  0.52950000  -0.81974496
  0.53000000  -0.81963608
  0.53000000  -0.81963973
  0.53000000  -0.81964337
  0.53000000  -0.81964701
  0.53000000  -0.81965064
  0.53000000  -0.81965427
  0.53000000  -0.81965789
  0.53000000  -0.81966151
  0.53000000  -0.81966512
  0.53000000  -0.81966872
  0.53000000  -0.81967232
  0.53000000  -0.81967591
  0.53000000  -0.81967950
  0.53000000  -0.81968308
  0.53000000  -0.81968665
  0.53000000  -0.81969022
  0.53000000  -0.81969378
  0.53000000  -0.81969734
  0.53000000  -0.81970089
  0.53000000  -0.81970444
  0.53000000  -0.81970798
  0.53000000  -0.81971152
  0.53000000  -0.81971505
  0.53000000  -0.81971857
  0.53000000  -0.81972209
  0.53000000  -0.81972560
  0.53000000  -0.81972911
  0.53000000  -0.81973261
  0.53000000  -0.81973611
  0.53000000  -0.81973960
  0.53000000  -0.81974309
  0.53000000  -0.81974657
  0.53000000  -0.81975004
  0.53000000  -0.81975351
  0.53000000  -0.81975698
  0.53000000  -0.81976044
  0.53000000  -0.81976389
  0.53000000  -0.81976734
  0.53000000  -0.81977078
  0.53000000  -0.81977422
  0.53050000  -0.81966571
  0.53050000  -0.81966935
  0.53050000  -0.81967298
  0.53050000  -0.81967660
  0.53050000  -0.81968022
  0.53050000  -0.81968384
  0.53050000  -0.81968744
  0.53050000  -0.81969105
  0.53050000  -0.81969464
  0.53050000  -0.81969823
  0.53050000  -0.81970182
  0.53050000  -0.81970540
  0.53050000  -0.81970897
  0.53050000  -0.81971254
  0.53050000  -0.81971610
  0.53050000  -0.81971965
  0.53050000  -0.81972321
  0.53050000  -0.81972675
  0.53050000  -0.81973029
  0.53050000  -0.81973382
  0.53050000  -0.81973735
  0.53050000  -0.81974087
  0.53050000  -0.81974439
  0.53050000  -0.81974790
  0.53050000  -0.81975141
  0.53050000  -0.81975491
  0.53050000  -0.81975840
  0.53050000  -0.81976189
  0.53050000  -0.81976538
  0.53050000  -0.81976885
  0.53050000  -0.81977233
  0.53050000  -0.81977579
  0.53050000  -0.81977926
  0.53050000  -0.81978271
  0.53050000  -0.81978617
  0.53050000  -0.81978961
  0.53050000  -0.81979305
  0.53050000  -0.81979649
  0.53050000  -0.81979992
  0.53050000  -0.81980334
  0.53100000  -0.81969522
  0.53100000  -0.81969884
  0.53100000  -0.81970246
  0.53100000  -0.81970607
  0.53100000  -0.81970968
  0.53100000  -0.81971328
  0.53100000  -0.81971687
  0.53100000  -0.81972046
  0.53100000  -0.81972404
  0.53100000  -0.81972762
  0.53100000  -0.81973119
  0.53100000  -0.81973476
  0.53100000  -0.81973832
  0.53100000  -0.81974187
  0.53100000  -0.81974542
  0.53100000  -0.81974896
  0.53100000  -0.81975250
  0.53100000  -0.81975603
  0.53100000  -0.81975956
  0.53100000  -0.81976308
  0.53100000  -0.81976659
  0.53100000  -0.81977010
  0.53100000  -0.81977361
  0.53100000  -0.81977711
  0.53100000  -0.81978060
  0.53100000  -0.81978409
  0.53100000  -0.81978757
  0.53100000  -0.81979104
  0.53100000  -0.81979452
  0.53100000  -0.81979798
  0.53100000  -0.81980144
  0.53100000  -0.81980490
  0.53100000  -0.81980835
  0.53100000  -0.81981179
  0.53100000  -0.81981523
  0.53100000  -0.81981866
  0.53100000  -0.81982209
  0.53100000  -0.81982551
  0.53100000  -0.81982893
  0.53100000  -0.81983234
  0.53150000  -0.81972460
  0.53150000  -0.81972821
  0.53150000  -0.81973181
  0.53150000  -0.81973541
  0.53150000  -0.81973900
  0.53150000  -0.81974259
  0.53150000  -0.81974617
  0.53150000  -0.81974974
  0.53150000  -0.81975331
  0.53150000  -0.81975688
  0.53150000  -0.81976044
  0.53150000  -0.81976399
  0.53150000  -0.81976754
  0.53150000  -0.81977108
  0.53150000  -0.81977461
  0.53150000  -0.81977814
  0.53150000  -0.81978167
  0.53150000  -0.81978519
  0.53150000  -0.81978870
  0.53150000  -0.81979221
  0.53150000  -0.81979571
  0.53150000  -0.81979921
  0.53150000  -0.81980270
  0.53150000  -0.81980618
  0.53150000  -0.81980966
  0.53150000  -0.81981314
  0.53150000  -0.81981661
  0.53150000  -0.81982007
  0.53150000  -0.81982353
  0.53150000  -0.81982698
  0.53150000  -0.81983043
  0.53150000  -0.81983387
  0.53150000  -0.81983731
  0.53150000  -0.81984074
  0.53150000  -0.81984416
  0.53150000  -0.81984759
  0.53150000  -0.81985100
  0.53150000  -0.81985441
  0.53150000  -0.81985782
  0.53150000  -0.81986121
  0.53200000  -0.81975385
  0.53200000  -0.81975744
  0.53200000  -0.81976104
  0.53200000  -0.81976462
  0.53200000  -0.81976820
  0.53200000  -0.81977177
  0.53200000  -0.81977534
  0.53200000  -0.81977890
  0.53200000  -0.81978246
  0.53200000  -0.81978601
  0.53200000  -0.81978956
  0.53200000  -0.81979310
  0.53200000  -0.81979663
  0.53200000  -0.81980016
  0.53200000  -0.81980368
  0.53200000  -0.81980720
  0.53200000  -0.81981071
  0.53200000  -0.81981422
  0.53200000  -0.81981772
  0.53200000  -0.81982121
  0.53200000  -0.81982470
  0.53200000  -0.81982818
  0.53200000  -0.81983166
  0.53200000  -0.81983513
  0.53200000  -0.81983860
  0.53200000  -0.81984206
  0.53200000  -0.81984552
  0.53200000  -0.81984897
  0.53200000  -0.81985242
  0.53200000  -0.81985586
  0.53200000  -0.81985929
  0.53200000  -0.81986272
  0.53200000  -0.81986614
  0.53200000  -0.81986956
  0.53200000  -0.81987298
  0.53200000  -0.81987638
  0.53200000  -0.81987979
  0.53200000  -0.81988318
  0.53200000  -0.81988658
  0.53200000  -0.81988996
  0.53250000  -0.81978297
  0.53250000  -0.81978656
  0.53250000  -0.81979014
  0.53250000  -0.81979371
  0.53250000  -0.81979727
  0.53250000  -0.81980083
  0.53250000  -0.81980439
  0.53250000  -0.81980794
  0.53250000  -0.81981148
  0.53250000  -0.81981502
  0.53250000  -0.81981855
  0.53250000  -0.81982208
  0.53250000  -0.81982560
  0.53250000  -0.81982911
  0.53250000  -0.81983262
  0.53250000  -0.81983613
  0.53250000  -0.81983963
  0.53250000  -0.81984312
  0.53250000  -0.81984661
  0.53250000  -0.81985009
  0.53250000  -0.81985356
  0.53250000  -0.81985704
  0.53250000  -0.81986050
  0.53250000  -0.81986396
  0.53250000  -0.81986742
  0.53250000  -0.81987086
  0.53250000  -0.81987431
  0.53250000  -0.81987775
  0.53250000  -0.81988118
  0.53250000  -0.81988461
  0.53250000  -0.81988803
  0.53250000  -0.81989144
  0.53250000  -0.81989486
  0.53250000  -0.81989826
  0.53250000  -0.81990166
  0.53250000  -0.81990506
  0.53250000  -0.81990845
  0.53250000  -0.81991183
  0.53250000  -0.81991521
  0.53250000  -0.81991859
  0.53300000  -0.81981197
  0.53300000  -0.81981554
  0.53300000  -0.81981911
  0.53300000  -0.81982267
  0.53300000  -0.81982622
  0.53300000  -0.81982977
  0.53300000  -0.81983331
  0.53300000  -0.81983685
  0.53300000  -0.81984038
  0.53300000  -0.81984390
  0.53300000  -0.81984742
  0.53300000  -0.81985093
  0.53300000  -0.81985444
  0.53300000  -0.81985794
  0.53300000  -0.81986144
  0.53300000  -0.81986493
  0.53300000  -0.81986842
  0.53300000  -0.81987190
  0.53300000  -0.81987537
  0.53300000  -0.81987884
  0.53300000  -0.81988230
  0.53300000  -0.81988576
  0.53300000  -0.81988922
  0.53300000  -0.81989266
  0.53300000  -0.81989610
  0.53300000  -0.81989954
  0.53300000  -0.81990297
  0.53300000  -0.81990640
  0.53300000  -0.81990982
  0.53300000  -0.81991323
  0.53300000  -0.81991664
  0.53300000  -0.81992005
  0.53300000  -0.81992344
  0.53300000  -0.81992684
  0.53300000  -0.81993023
  0.53300000  -0.81993361
  0.53300000  -0.81993699
  0.53300000  -0.81994036
  0.53300000  -0.81994373
  0.53300000  -0.81994709
  0.53350000  -0.81984085
  0.53350000  -0.81984441
  0.53350000  -0.81984796
  0.53350000  -0.81985150
  0.53350000  -0.81985504
  0.53350000  -0.81985858
  0.53350000  -0.81986211
  0.53350000  -0.81986563
  0.53350000  -0.81986915
  0.53350000  -0.81987266
  0.53350000  -0.81987617
  0.53350000  -0.81987967
  0.53350000  -0.81988316
  0.53350000  -0.81988665
  0.53350000  -0.81989013
  0.53350000  -0.81989361
  0.53350000  -0.81989708
  0.53350000  -0.81990055
  0.53350000  -0.81990401
  0.53350000  -0.81990747
  0.53350000  -0.81991092
  0.53350000  -0.81991437
  0.53350000  -0.81991781
  0.53350000  -0.81992124
  0.53350000  -0.81992467
  0.53350000  -0.81992809
  0.53350000  -0.81993151
  0.53350000  -0.81993492
  0.53350000  -0.81993833
  0.53350000  -0.81994173
  0.53350000  -0.81994513
  0.53350000  -0.81994852
  0.53350000  -0.81995191
  0.53350000  -0.81995529
  0.53350000  -0.81995866
  0.53350000  -0.81996204
  0.53350000  -0.81996540
  0.53350000  -0.81996876
  0.53350000  -0.81997211
  0.53350000  -0.81997546
  0.53400000  -0.81986960
  0.53400000  -0.81987314
  0.53400000  -0.81987668
  0.53400000  -0.81988022
  0.53400000  -0.81988374
  0.53400000  -0.81988726
  0.53400000  -0.81989078
  0.53400000  -0.81989429
  0.53400000  -0.81989779
  0.53400000  -0.81990129
  0.53400000  -0.81990479
  0.53400000  -0.81990827
  0.53400000  -0.81991176
  0.53400000  -0.81991523
  0.53400000  -0.81991870
  0.53400000  -0.81992217
  0.53400000  -0.81992563
  0.53400000  -0.81992908
  0.53400000  -0.81993253
  0.53400000  -0.81993598
  0.53400000  -0.81993941
  0.53400000  -0.81994285
  0.53400000  -0.81994627
  0.53400000  -0.81994969
  0.53400000  -0.81995311
  0.53400000  -0.81995652
  0.53400000  -0.81995993
  0.53400000  -0.81996333
  0.53400000  -0.81996672
  0.53400000  -0.81997011
  0.53400000  -0.81997350
  0.53400000  -0.81997688
  0.53400000  -0.81998025
  0.53400000  -0.81998362
  0.53400000  -0.81998698
  0.53400000  -0.81999034
  0.53400000  -0.81999369
  0.53400000  -0.81999704
  0.53400000  -0.82000038
  0.53400000  -0.82000372
  0.53450000  -0.81989823
  0.53450000  -0.81990176
  0.53450000  -0.81990528
  0.53450000  -0.81990880
  0.53450000  -0.81991232
  0.53450000  -0.81991583
  0.53450000  -0.81991933
  0.53450000  -0.81992282
  0.53450000  -0.81992632
  0.53450000  -0.81992980
  0.53450000  -0.81993328
  0.53450000  -0.81993676
  0.53450000  -0.81994023
  0.53450000  -0.81994369
  0.53450000  -0.81994715
  0.53450000  -0.81995060
  0.53450000  -0.81995405
  0.53450000  -0.81995749
  0.53450000  -0.81996093
  0.53450000  -0.81996436
  0.53450000  -0.81996778
  0.53450000  -0.81997120
  0.53450000  -0.81997462
  0.53450000  -0.81997803
  0.53450000  -0.81998143
  0.53450000  -0.81998483
  0.53450000  -0.81998822
  0.53450000  -0.81999161
  0.53450000  -0.81999499
  0.53450000  -0.81999837
  0.53450000  -0.82000174
  0.53450000  -0.82000511
  0.53450000  -0.82000847
  0.53450000  -0.82001182
  0.53450000  -0.82001517
  0.53450000  -0.82001852
  0.53450000  -0.82002186
  0.53450000  -0.82002520
  0.53450000  -0.82002853
  0.53450000  -0.82003185
  0.53500000  -0.81992673
  0.53500000  -0.81993025
  0.53500000  -0.81993376
  0.53500000  -0.81993727
  0.53500000  -0.81994077
  0.53500000  -0.81994426
  0.53500000  -0.81994775
  0.53500000  -0.81995124
  0.53500000  -0.81995472
  0.53500000  -0.81995819
  0.53500000  -0.81996166
  0.53500000  -0.81996512
  0.53500000  -0.81996858
  0.53500000  -0.81997203
  0.53500000  -0.81997547
  0.53500000  -0.81997891
  0.53500000  -0.81998235
  0.53500000  -0.81998577
  0.53500000  -0.81998920
  0.53500000  -0.81999262
  0.53500000  -0.81999603
  0.53500000  -0.81999944
  0.53500000  -0.82000284
  0.53500000  -0.82000623
  0.53500000  -0.82000963
  0.53500000  -0.82001301
  0.53500000  -0.82001639
  0.53500000  -0.82001977
  0.53500000  -0.82002314
  0.53500000  -0.82002650
  0.53500000  -0.82002986
  0.53500000  -0.82003322
  0.53500000  -0.82003656
  0.53500000  -0.82003991
  0.53500000  -0.82004325
  0.53500000  -0.82004658
  0.53500000  -0.82004991
  0.53500000  -0.82005323
  0.53500000  -0.82005655
  0.53500000  -0.82005986
  0.53550000  -0.81995511
  0.53550000  -0.81995862
  0.53550000  -0.81996211
  0.53550000  -0.81996561
  0.53550000  -0.81996910
  0.53550000  -0.81997258
  0.53550000  -0.81997606
  0.53550000  -0.81997953
  0.53550000  -0.81998299
  0.53550000  -0.81998645
  0.53550000  -0.81998991
  0.53550000  -0.81999336
  0.53550000  -0.81999680
  0.53550000  -0.82000024
  0.53550000  -0.82000367
  0.53550000  -0.82000710
  0.53550000  -0.82001052
  0.53550000  -0.82001394
  0.53550000  -0.82001735
  0.53550000  -0.82002075
  0.53550000  -0.82002415
  0.53550000  -0.82002755
  0.53550000  -0.82003094
  0.53550000  -0.82003432
  0.53550000  -0.82003770
  0.53550000  -0.82004107
  0.53550000  -0.82004444
  0.53550000  -0.82004780
  0.53550000  -0.82005116
  0.53550000  -0.82005451
  0.53550000  -0.82005786
  0.53550000  -0.82006120
  0.53550000  -0.82006454
  0.53550000  -0.82006787
  0.53550000  -0.82007120
  0.53550000  -0.82007452
  0.53550000  -0.82007783
  0.53550000  -0.82008114
  0.53550000  -0.82008445
  0.53550000  -0.82008775
  0.53600000  -0.81998337
  0.53600000  -0.81998686
  0.53600000  -0.81999035
  0.53600000  -0.81999383
  0.53600000  -0.81999730
  0.53600000  -0.82000077
  0.53600000  -0.82000424
  0.53600000  -0.82000770
  0.53600000  -0.82001115
  0.53600000  -0.82001460
  0.53600000  -0.82001804
  0.53600000  -0.82002147
  0.53600000  -0.82002491
  0.53600000  -0.82002833
  0.53600000  -0.82003175
  0.53600000  -0.82003517
  0.53600000  -0.82003857
  0.53600000  -0.82004198
  0.53600000  -0.82004538
  0.53600000  -0.82004877
  0.53600000  -0.82005216
  0.53600000  -0.82005554
  0.53600000  -0.82005892
  0.53600000  -0.82006229
  0.53600000  -0.82006565
  0.53600000  -0.82006901
  0.53600000  -0.82007237
  0.53600000  -0.82007572
  0.53600000  -0.82007906
  0.53600000  -0.82008240
  0.53600000  -0.82008574
  0.53600000  -0.82008907
  0.53600000  -0.82009239
  0.53600000  -0.82009571
  0.53600000  -0.82009902
  0.53600000  -0.82010233
  0.53600000  -0.82010564
  0.53600000  -0.82010893
  0.53600000  -0.82011223
  0.53600000  -0.82011552
  0.53650000  -0.82001150
  0.53650000  -0.82001498
  0.53650000  -0.82001846
  0.53650000  -0.82002192
  0.53650000  -0.82002539
  0.53650000  -0.82002884
  0.53650000  -0.82003230
  0.53650000  -0.82003574
  0.53650000  -0.82003918
  0.53650000  -0.82004262
  0.53650000  -0.82004605
  0.53650000  -0.82004947
  0.53650000  -0.82005289
  0.53650000  -0.82005630
  0.53650000  -0.82005971
  0.53650000  -0.82006311
  0.53650000  -0.82006651
  0.53650000  -0.82006990
  0.53650000  -0.82007328
  0.53650000  -0.82007666
  0.53650000  -0.82008004
  0.53650000  -0.82008341
  0.53650000  -0.82008677
  0.53650000  -0.82009013
  0.53650000  -0.82009349
  0.53650000  -0.82009683
  0.53650000  -0.82010018
  0.53650000  -0.82010351
  0.53650000  -0.82010685
  0.53650000  -0.82011017
  0.53650000  -0.82011350
  0.53650000  -0.82011681
  0.53650000  -0.82012013
  0.53650000  -0.82012343
  0.53650000  -0.82012673
  0.53650000  -0.82013003
  0.53650000  -0.82013332
  0.53650000  -0.82013661
  0.53650000  -0.82013989
  0.53650000  -0.82014316
  0.53700000  -0.82003952
  0.53700000  -0.82004298
  0.53700000  -0.82004645
  0.53700000  -0.82004990
  0.53700000  -0.82005335
  0.53700000  -0.82005679
  0.53700000  -0.82006023
  0.53700000  -0.82006367
  0.53700000  -0.82006709
  0.53700000  -0.82007052
  0.53700000  -0.82007393
  0.53700000  -0.82007734
  0.53700000  -0.82008075
  0.53700000  -0.82008415
  0.53700000  -0.82008754
  0.53700000  -0.82009093
  0.53700000  -0.82009432
  0.53700000  -0.82009770
  0.53700000  -0.82010107
  0.53700000  -0.82010444
  0.53700000  -0.82010780
  0.53700000  -0.82011116
  0.53700000  -0.82011451
  0.53700000  -0.82011786
  0.53700000  -0.82012120
  0.53700000  -0.82012453
  0.53700000  -0.82012786
  0.53700000  -0.82013119
  0.53700000  -0.82013451
  0.53700000  -0.82013782
  0.53700000  -0.82014113
  0.53700000  -0.82014444
  0.53700000  -0.82014774
  0.53700000  -0.82015103
  0.53700000  -0.82015432
  0.53700000  -0.82015761
  0.53700000  -0.82016088
  0.53700000  -0.82016416
  0.53700000  -0.82016743
  0.53700000  -0.82017069
  0.53750000  -0.82006741
  0.53750000  -0.82007087
  0.53750000  -0.82007431
  0.53750000  -0.82007776
  0.53750000  -0.82008119
  0.53750000  -0.82008462
  0.53750000  -0.82008805
  0.53750000  -0.82009147
  0.53750000  -0.82009489
  0.53750000  -0.82009830
  0.53750000  -0.82010170
  0.53750000  -0.82010510
  0.53750000  -0.82010849
  0.53750000  -0.82011188
  0.53750000  -0.82011526
  0.53750000  -0.82011864
  0.53750000  -0.82012201
  0.53750000  -0.82012538
  0.53750000  -0.82012874
  0.53750000  -0.82013209
  0.53750000  -0.82013544
  0.53750000  -0.82013879
  0.53750000  -0.82014213
  0.53750000  -0.82014546
  0.53750000  -0.82014879
  0.53750000  -0.82015211
  0.53750000  -0.82015543
  0.53750000  -0.82015874
  0.53750000  -0.82016205
  0.53750000  -0.82016535
  0.53750000  -0.82016865
  0.53750000  -0.82017194
  0.53750000  -0.82017523
  0.53750000  -0.82017851
  0.53750000  -0.82018179
  0.53750000  -0.82018506
  0.53750000  -0.82018833
  0.53750000  -0.82019159
  0.53750000  -0.82019485
  0.53750000  -0.82019810
  0.53800000  -0.82009519
  0.53800000  -0.82009863
  0.53800000  -0.82010206
  0.53800000  -0.82010549
  0.53800000  -0.82010892
  0.53800000  -0.82011233
  0.53800000  -0.82011575
  0.53800000  -0.82011916
  0.53800000  -0.82012256
  0.53800000  -0.82012595
  0.53800000  -0.82012935
  0.53800000  -0.82013273
  0.53800000  -0.82013611
  0.53800000  -0.82013949
  0.53800000  -0.82014286
  0.53800000  -0.82014622
  0.53800000  -0.82014958
  0.53800000  -0.82015293
  0.53800000  -0.82015628
  0.53800000  -0.82015963
  0.53800000  -0.82016296
  0.53800000  -0.82016630
  0.53800000  -0.82016962
  0.53800000  -0.82017294
  0.53800000  -0.82017626
  0.53800000  -0.82017957
  0.53800000  -0.82018288
  0.53800000  -0.82018618
  0.53800000  -0.82018947
  0.53800000  -0.82019277
  0.53800000  -0.82019605
  0.53800000  -0.82019933
  0.53800000  -0.82020261
  0.53800000  -0.82020588
  0.53800000  -0.82020914
  0.53800000  -0.82021240
  0.53800000  -0.82021565
  0.53800000  -0.82021890
  0.53800000  -0.82022215
  0.53800000  -0.82022539
  0.53850000  -0.82012284
  0.53850000  -0.82012627
  0.53850000  -0.82012969
  0.53850000  -0.82013311
  0.53850000  -0.82013652
  0.53850000  -0.82013992
  0.53850000  -0.82014333
  0.53850000  -0.82014672
  0.53850000  -0.82015011
  0.53850000  -0.82015349
  0.53850000  -0.82015687
  0.53850000  -0.82016025
  0.53850000  -0.82016361
  0.53850000  -0.82016698
  0.53850000  -0.82017033
  0.53850000  -0.82017369
  0.53850000  -0.82017703
  0.53850000  -0.82018037
  0.53850000  -0.82018371
  0.53850000  -0.82018704
  0.53850000  -0.82019037
  0.53850000  -0.82019369
  0.53850000  -0.82019700
  0.53850000  -0.82020031
  0.53850000  -0.82020361
  0.53850000  -0.82020691
  0.53850000  -0.82021021
  0.53850000  -0.82021350
  0.53850000  -0.82021678
  0.53850000  -0.82022006
  0.53850000  -0.82022333
  0.53850000  -0.82022660
  0.53850000  -0.82022986
  0.53850000  -0.82023312
  0.53850000  -0.82023637
  0.53850000  -0.82023962
  0.53850000  -0.82024286
  0.53850000  -0.82024610
  0.53850000  -0.82024933
  0.53850000  -0.82025256
  0.53900000  -0.82015037
  0.53900000  -0.82015379
  0.53900000  -0.82015720
  0.53900000  -0.82016060
  0.53900000  -0.82016400
  0.53900000  -0.82016740
  0.53900000  -0.82017078
  0.53900000  -0.82017417
  0.53900000  -0.82017754
  0.53900000  -0.82018092
  0.53900000  -0.82018428
  0.53900000  -0.82018764
  0.53900000  -0.82019100
  0.53900000  -0.82019435
  0.53900000  -0.82019769
  0.53900000  -0.82020103
  0.53900000  -0.82020437
  0.53900000  -0.82020770
  0.53900000  -0.82021102
  0.53900000  -0.82021434
  0.53900000  -0.82021765
  0.53900000  -0.82022096
  0.53900000  -0.82022426
  0.53900000  -0.82022756
  0.53900000  -0.82023085
  0.53900000  -0.82023414
  0.53900000  -0.82023742
  0.53900000  -0.82024069
  0.53900000  -0.82024397
  0.53900000  -0.82024723
  0.53900000  -0.82025049
  0.53900000  -0.82025375
  0.53900000  -0.82025700
  0.53900000  -0.82026025
  0.53900000  -0.82026349
  0.53900000  -0.82026672
  0.53900000  -0.82026995
  0.53900000  -0.82027318
  0.53900000  -0.82027640
  0.53900000  -0.82027961
  0.53950000  -0.82017779
  0.53950000  -0.82018119
  0.53950000  -0.82018459
  0.53950000  -0.82018798
  0.53950000  -0.82019137
  0.53950000  -0.82019475
  0.53950000  -0.82019812
  0.53950000  -0.82020149
  0.53950000  -0.82020486
  0.53950000  -0.82020822
  0.53950000  -0.82021157
  0.53950000  -0.82021492
  0.53950000  -0.82021826
  0.53950000  -0.82022160
  0.53950000  -0.82022493
  0.53950000  -0.82022826
  0.53950000  -0.82023158
  0.53950000  -0.82023490
  0.53950000  -0.82023821
  0.53950000  -0.82024152
  0.53950000  -0.82024482
  0.53950000  -0.82024811
  0.53950000  -0.82025140
  0.53950000  -0.82025469
  0.53950000  -0.82025797
  0.53950000  -0.82026124
  0.53950000  -0.82026451
  0.53950000  -0.82026778
  0.53950000  -0.82027103
  0.53950000  -0.82027429
  0.53950000  -0.82027754
  0.53950000  -0.82028078
  0.53950000  -0.82028402
  0.53950000  -0.82028725
  0.53950000  -0.82029048
  0.53950000  -0.82029371
  0.53950000  -0.82029692
  0.53950000  -0.82030014
  0.53950000  -0.82030335
  0.53950000  -0.82030655
  0.54000000  -0.82020509
  0.54000000  -0.82020848
  0.54000000  -0.82021186
  0.54000000  -0.82021524
  0.54000000  -0.82021861
  0.54000000  -0.82022198
  0.54000000  -0.82022535
  0.54000000  -0.82022870
  0.54000000  -0.82023206
  0.54000000  -0.82023540
  0.54000000  -0.82023874
  0.54000000  -0.82024208
  0.54000000  -0.82024541
  0.54000000  -0.82024874
  0.54000000  -0.82025206
  0.54000000  -0.82025537
  0.54000000  -0.82025868
  0.54000000  -0.82026198
  0.54000000  -0.82026528
  0.54000000  -0.82026858
  0.54000000  -0.82027187
  0.54000000  -0.82027515
  0.54000000  -0.82027843
  0.54000000  -0.82028170
  0.54000000  -0.82028497
  0.54000000  -0.82028823
  0.54000000  -0.82029149
  0.54000000  -0.82029474
  0.54000000  -0.82029799
  0.54000000  -0.82030123
  0.54000000  -0.82030446
  0.54000000  -0.82030770
  0.54000000  -0.82031092
  0.54000000  -0.82031414
  0.54000000  -0.82031736
  0.54000000  -0.82032057
  0.54000000  -0.82032378
  0.54000000  -0.82032698
  0.54000000  -0.82033018
  0.54000000  -0.82033337
  0.54050000  -0.82023227
  0.54050000  -0.82023564
  0.54050000  -0.82023902
  0.54050000  -0.82024238
  0.54050000  -0.82024574
  0.54050000  -0.82024910
  0.54050000  -0.82025245
  0.54050000  -0.82025580
  0.54050000  -0.82025914
  0.54050000  -0.82026247
  0.54050000  -0.82026580
  0.54050000  -0.82026912
  0.54050000  -0.82027244
  0.54050000  -0.82027575
  0.54050000  -0.82027906
  0.54050000  -0.82028236
  0.54050000  -0.82028566
  0.54050000  -0.82028895
  0.54050000  -0.82029224
  0.54050000  -0.82029552
  0.54050000  -0.82029880
  0.54050000  -0.82030207
  0.54050000  -0.82030533
  0.54050000  -0.82030859
  0.54050000  -0.82031185
  0.54050000  -0.82031510
  0.54050000  -0.82031835
  0.54050000  -0.82032159
  0.54050000  -0.82032482
  0.54050000  -0.82032805
  0.54050000  -0.82033128
  0.54050000  -0.82033449
  0.54050000  -0.82033771
  0.54050000  -0.82034092
  0.54050000  -0.82034412
  0.54050000  -0.82034732
  0.54050000  -0.82035052
  0.54050000  -0.82035371
  0.54050000  -0.82035689
  0.54050000  -0.82036007
  0.54100000  -0.82025933
  0.54100000  -0.82026269
  0.54100000  -0.82026605
  0.54100000  -0.82026941
  0.54100000  -0.82027276
  0.54100000  -0.82027610
  0.54100000  -0.82027944
  0.54100000  -0.82028277
  0.54100000  -0.82028610
  0.54100000  -0.82028942
  0.54100000  -0.82029274
  0.54100000  -0.82029605
  0.54100000  -0.82029935
  0.54100000  -0.82030265
  0.54100000  -0.82030595
  0.54100000  -0.82030924
  0.54100000  -0.82031252
  0.54100000  -0.82031580
  0.54100000  -0.82031908
  0.54100000  -0.82032235
  0.54100000  -0.82032561
  0.54100000  -0.82032887
  0.54100000  -0.82033212
  0.54100000  -0.82033537
  0.54100000  -0.82033862
  0.54100000  -0.82034186
  0.54100000  -0.82034509
  0.54100000  -0.82034832
  0.54100000  -0.82035154
  0.54100000  -0.82035476
  0.54100000  -0.82035797
  0.54100000  -0.82036118
  0.54100000  -0.82036438
  0.54100000  -0.82036758
  0.54100000  -0.82037077
  0.54100000  -0.82037396
  0.54100000  -0.82037714
  0.54100000  -0.82038032
  0.54100000  -0.82038349
  0.54100000  -0.82038666
  0.54150000  -0.82028627
  0.54150000  -0.82028963
  0.54150000  -0.82029297
  0.54150000  -0.82029631
  0.54150000  -0.82029965
  0.54150000  -0.82030298
  0.54150000  -0.82030631
  0.54150000  -0.82030963
  0.54150000  -0.82031294
  0.54150000  -0.82031625
  0.54150000  -0.82031956
  0.54150000  -0.82032286
  0.54150000  -0.82032615
  0.54150000  -0.82032944
  0.54150000  -0.82033272
  0.54150000  -0.82033600
  0.54150000  -0.82033927
  0.54150000  -0.82034254
  0.54150000  -0.82034580
  0.54150000  -0.82034906
  0.54150000  -0.82035231
  0.54150000  -0.82035556
  0.54150000  -0.82035880
  0.54150000  -0.82036204
  0.54150000  -0.82036527
  0.54150000  -0.82036849
  0.54150000  -0.82037172
  0.54150000  -0.82037493
  0.54150000  -0.82037814
  0.54150000  -0.82038135
  0.54150000  -0.82038455
  0.54150000  -0.82038774
  0.54150000  -0.82039094
  0.54150000  -0.82039412
  0.54150000  -0.82039730
  0.54150000  -0.82040048
  0.54150000  -0.82040365
  0.54150000  -0.82040681
  0.54150000  -0.82040998
  0.54150000  -0.82041313
  0.54200000  -0.82031310
  0.54200000  -0.82031644
  0.54200000  -0.82031978
  0.54200000  -0.82032311
  0.54200000  -0.82032643
  0.54200000  -0.82032975
  0.54200000  -0.82033306
  0.54200000  -0.82033637
  0.54200000  -0.82033967
  0.54200000  -0.82034297
  0.54200000  -0.82034626
  0.54200000  -0.82034955
  0.54200000  -0.82035283
  0.54200000  -0.82035611
  0.54200000  -0.82035938
  0.54200000  -0.82036264
  0.54200000  -0.82036590
  0.54200000  -0.82036916
  0.54200000  -0.82037241
  0.54200000  -0.82037566
  0.54200000  -0.82037890
  0.54200000  -0.82038213
  0.54200000  -0.82038536
  0.54200000  -0.82038858
  0.54200000  -0.82039180
  0.54200000  -0.82039502
  0.54200000  -0.82039823
  0.54200000  -0.82040143
  0.54200000  -0.82040463
  0.54200000  -0.82040782
  0.54200000  -0.82041101
  0.54200000  -0.82041420
  0.54200000  -0.82041738
  0.54200000  -0.82042055
  0.54200000  -0.82042372
  0.54200000  -0.82042688
  0.54200000  -0.82043004
  0.54200000  -0.82043320
  0.54200000  -0.82043634
  0.54200000  -0.82043949
  0.54250000  -0.82033981
  0.54250000  -0.82034314
  0.54250000  -0.82034647
  0.54250000  -0.82034978
  0.54250000  -0.82035309
  0.54250000  -0.82035640
  0.54250000  -0.82035970
  0.54250000  -0.82036300
  0.54250000  -0.82036629
  0.54250000  -0.82036957
  0.54250000  -0.82037285
  0.54250000  -0.82037613
  0.54250000  -0.82037940
  0.54250000  -0.82038266
  0.54250000  -0.82038592
  0.54250000  -0.82038917
  0.54250000  -0.82039242
  0.54250000  -0.82039567
  0.54250000  -0.82039890
  0.54250000  -0.82040214
  0.54250000  -0.82040536
  0.54250000  -0.82040859
  0.54250000  -0.82041180
  0.54250000  -0.82041502
  0.54250000  -0.82041822
  0.54250000  -0.82042143
  0.54250000  -0.82042462
  0.54250000  -0.82042782
  0.54250000  -0.82043100
  0.54250000  -0.82043418
  0.54250000  -0.82043736
  0.54250000  -0.82044053
  0.54250000  -0.82044370
  0.54250000  -0.82044686
  0.54250000  -0.82045002
  0.54250000  -0.82045317
  0.54250000  -0.82045632
  0.54250000  -0.82045946
  0.54250000  -0.82046260
  0.54250000  -0.82046573
  0.54300000  -0.82036641
  0.54300000  -0.82036973
  0.54300000  -0.82037304
  0.54300000  -0.82037634
  0.54300000  -0.82037964
  0.54300000  -0.82038294
  0.54300000  -0.82038623
  0.54300000  -0.82038951
  0.54300000  -0.82039279
  0.54300000  -0.82039606
  0.54300000  -0.82039933
  0.54300000  -0.82040259
  0.54300000  -0.82040585
  0.54300000  -0.82040910
  0.54300000  -0.82041235
  0.54300000  -0.82041559
  0.54300000  -0.82041882
  0.54300000  -0.82042206
  0.54300000  -0.82042528
  0.54300000  -0.82042850
  0.54300000  -0.82043172
  0.54300000  -0.82043493
  0.54300000  -0.82043813
  0.54300000  -0.82044133
  0.54300000  -0.82044453
  0.54300000  -0.82044772
  0.54300000  -0.82045091
  0.54300000  -0.82045409
  0.54300000  -0.82045726
  0.54300000  -0.82046043
  0.54300000  -0.82046360
  0.54300000  -0.82046676
  0.54300000  -0.82046991
  0.54300000  -0.82047306
  0.54300000  -0.82047621
  0.54300000  -0.82047935
  0.54300000  -0.82048248
  0.54300000  -0.82048561
  0.54300000  -0.82048874
  0.54300000  -0.82049186
  0.54350000  -0.82039290
  0.54350000  -0.82039620
  0.54350000  -0.82039950
  0.54350000  -0.82040279
  0.54350000  -0.82040608
  0.54350000  -0.82040936
  0.54350000  -0.82041263
  0.54350000  -0.82041591
  0.54350000  -0.82041917
  0.54350000  -0.82042243
  0.54350000  -0.82042569
  0.54350000  -0.82042894
  0.54350000  -0.82043218
  0.54350000  -0.82043542
  0.54350000  -0.82043866
  0.54350000  -0.82044189
  0.54350000  -0.82044511
  0.54350000  -0.82044833
  0.54350000  -0.82045155
  0.54350000  -0.82045475
  0.54350000  -0.82045796
  0.54350000  -0.82046116
  0.54350000  -0.82046435
  0.54350000  -0.82046754
  0.54350000  -0.82047072
  0.54350000  -0.82047390
  0.54350000  -0.82047707
  0.54350000  -0.82048024
  0.54350000  -0.82048341
  0.54350000  -0.82048656
  0.54350000  -0.82048972
  0.54350000  -0.82049287
  0.54350000  -0.82049601
  0.54350000  -0.82049915
  0.54350000  -0.82050228
  0.54350000  -0.82050541
  0.54350000  -0.82050854
  0.54350000  -0.82051165
  0.54350000  -0.82051477
  0.54350000  -0.82051788
  0.54400000  -0.82041926
  0.54400000  -0.82042256
  0.54400000  -0.82042584
  0.54400000  -0.82042912
  0.54400000  -0.82043240
  0.54400000  -0.82043567
  0.54400000  -0.82043893
  0.54400000  -0.82044219
  0.54400000  -0.82044544
  0.54400000  -0.82044869
  0.54400000  -0.82045194
  0.54400000  -0.82045517
  0.54400000  -0.82045841
  0.54400000  -0.82046163
  0.54400000  -0.82046486
  0.54400000  -0.82046807
  0.54400000  -0.82047129
  0.54400000  -0.82047449
  0.54400000  -0.82047770
  0.54400000  -0.82048089
  0.54400000  -0.82048408
  0.54400000  -0.82048727
  0.54400000  -0.82049045
  0.54400000  -0.82049363
  0.54400000  -0.82049680
  0.54400000  -0.82049997
  0.54400000  -0.82050313
  0.54400000  -0.82050629
  0.54400000  -0.82050944
  0.54400000  -0.82051258
  0.54400000  -0.82051573
  0.54400000  -0.82051886
  0.54400000  -0.82052200
  0.54400000  -0.82052512
  0.54400000  -0.82052824
  0.54400000  -0.82053136
  0.54400000  -0.82053447
  0.54400000  -0.82053758
  0.54400000  -0.82054068
  0.54400000  -0.82054378
  0.54450000  -0.82044552
  0.54450000  -0.82044880
  0.54450000  -0.82045207
  0.54450000  -0.82045534
  0.54450000  -0.82045860
  0.54450000  -0.82046186
  0.54450000  -0.82046511
  0.54450000  -0.82046836
  0.54450000  -0.82047160
  0.54450000  -0.82047484
  0.54450000  -0.82047807
  0.54450000  -0.82048129
  0.54450000  -0.82048452
  0.54450000  -0.82048773
  0.54450000  -0.82049094
  0.54450000  -0.82049415
  0.54450000  -0.82049735
  0.54450000  -0.82050054
  0.54450000  -0.82050373
  0.54450000  -0.82050692
  0.54450000  -0.82051010
  0.54450000  -0.82051327
  0.54450000  -0.82051644
  0.54450000  -0.82051961
  0.54450000  -0.82052277
  0.54450000  -0.82052592
  0.54450000  -0.82052907
  0.54450000  -0.82053222
  0.54450000  -0.82053536
  0.54450000  -0.82053849
  0.54450000  -0.82054162
  0.54450000  -0.82054475
  0.54450000  -0.82054787
  0.54450000  -0.82055098
  0.54450000  -0.82055409
  0.54450000  -0.82055720
  0.54450000  -0.82056030
  0.54450000  -0.82056339
  0.54450000  -0.82056649
  0.54450000  -0.82056957
  0.54500000  -0.82047166
  0.54500000  -0.82047493
  0.54500000  -0.82047819
  0.54500000  -0.82048144
  0.54500000  -0.82048469
  0.54500000  -0.82048794
  0.54500000  -0.82049118
  0.54500000  -0.82049441
  0.54500000  -0.82049764
  0.54500000  -0.82050087
  0.54500000  -0.82050409
  0.54500000  -0.82050730
  0.54500000  -0.82051051
  0.54500000  -0.82051372
  0.54500000  -0.82051691
  0.54500000  -0.82052011
  0.54500000  -0.82052330
  0.54500000  -0.82052648
  0.54500000  -0.82052966
  0.54500000  -0.82053283
  0.54500000  -0.82053600
  0.54500000  -0.82053916
  0.54500000  -0.82054232
  0.54500000  -0.82054547
  0.54500000  -0.82054862
  0.54500000  -0.82055176
  0.54500000  -0.82055490
  0.54500000  -0.82055804
  0.54500000  -0.82056116
  0.54500000  -0.82056429
  0.54500000  -0.82056741
  0.54500000  -0.82057052
  0.54500000  -0.82057363
  0.54500000  -0.82057673
  0.54500000  -0.82057983
  0.54500000  -0.82058292
  0.54500000  -0.82058601
  0.54500000  -0.82058910
  0.54500000  -0.82059218
  0.54500000  -0.82059525
  0.54550000  -0.82049769
  0.54550000  -0.82050094
  0.54550000  -0.82050419
  0.54550000  -0.82050744
  0.54550000  -0.82051067
  0.54550000  -0.82051391
  0.54550000  -0.82051714
  0.54550000  -0.82052036
  0.54550000  -0.82052358
  0.54550000  -0.82052679
  0.54550000  -0.82053000
  0.54550000  -0.82053320
  0.54550000  -0.82053640
  0.54550000  -0.82053959
  0.54550000  -0.82054277
  0.54550000  -0.82054596
  0.54550000  -0.82054913
  0.54550000  -0.82055230
  0.54550000  -0.82055547
  0.54550000  -0.82055863
  0.54550000  -0.82056179
  0.54550000  -0.82056494
  0.54550000  -0.82056809
  0.54550000  -0.82057123
  0.54550000  -0.82057436
  0.54550000  -0.82057749
  0.54550000  -0.82058062
  0.54550000  -0.82058374
  0.54550000  -0.82058686
  0.54550000  -0.82058997
  0.54550000  -0.82059308
  0.54550000  -0.82059618
  0.54550000  -0.82059928
  0.54550000  -0.82060237
  0.54550000  -0.82060545
  0.54550000  -0.82060854
  0.54550000  -0.82061161
  0.54550000  -0.82061469
  0.54550000  -0.82061775
  0.54550000  -0.82062082
  0.54600000  -0.82052360
  0.54600000  -0.82052685
  0.54600000  -0.82053008
  0.54600000  -0.82053332
  0.54600000  -0.82053654
  0.54600000  -0.82053976
  0.54600000  -0.82054298
  0.54600000  -0.82054619
  0.54600000  -0.82054940
  0.54600000  -0.82055260
  0.54600000  -0.82055579
  0.54600000  -0.82055898
  0.54600000  -0.82056217
  0.54600000  -0.82056535
  0.54600000  -0.82056852
  0.54600000  -0.82057169
  0.54600000  -0.82057486
  0.54600000  -0.82057802
  0.54600000  -0.82058117
  0.54600000  -0.82058432
  0.54600000  -0.82058746
  0.54600000  -0.82059060
  0.54600000  -0.82059374
  0.54600000  -0.82059687
  0.54600000  -0.82059999
  0.54600000  -0.82060311
  0.54600000  -0.82060623
  0.54600000  -0.82060934
  0.54600000  -0.82061244
  0.54600000  -0.82061554
  0.54600000  -0.82061864
  0.54600000  -0.82062173
  0.54600000  -0.82062481
  0.54600000  -0.82062789
  0.54600000  -0.82063097
  0.54600000  -0.82063404
  0.54600000  -0.82063711
  0.54600000  -0.82064017
  0.54600000  -0.82064322
  0.54600000  -0.82064627
  0.54650000  -0.82054941
  0.54650000  -0.82055264
  0.54650000  -0.82055586
  0.54650000  -0.82055908
  0.54650000  -0.82056230
  0.54650000  -0.82056551
  0.54650000  -0.82056871
  0.54650000  -0.82057191
  0.54650000  -0.82057510
  0.54650000  -0.82057829
  0.54650000  -0.82058148
  0.54650000  -0.82058465
  0.54650000  -0.82058783
  0.54650000  -0.82059100
  0.54650000  -0.82059416
  0.54650000  -0.82059732
  0.54650000  -0.82060047
  0.54650000  -0.82060362
  0.54650000  -0.82060676
  0.54650000  -0.82060990
  0.54650000  -0.82061303
  0.54650000  -0.82061616
  0.54650000  -0.82061928
  0.54650000  -0.82062240
  0.54650000  -0.82062551
  0.54650000  -0.82062862
  0.54650000  -0.82063172
  0.54650000  -0.82063482
  0.54650000  -0.82063791
  0.54650000  -0.82064100
  0.54650000  -0.82064409
  0.54650000  -0.82064716
  0.54650000  -0.82065024
  0.54650000  -0.82065331
  0.54650000  -0.82065637
  0.54650000  -0.82065943
  0.54650000  -0.82066249
  0.54650000  -0.82066554
  0.54650000  -0.82066858
  0.54650000  -0.82067162
  0.54700000  -0.82057510
  0.54700000  -0.82057832
  0.54700000  -0.82058153
  0.54700000  -0.82058474
  0.54700000  -0.82058794
  0.54700000  -0.82059114
  0.54700000  -0.82059433
  0.54700000  -0.82059752
  0.54700000  -0.82060070
  0.54700000  -0.82060388
  0.54700000  -0.82060705
  0.54700000  -0.82061021
  0.54700000  -0.82061338
  0.54700000  -0.82061653
  0.54700000  -0.82061968
  0.54700000  -0.82062283
  0.54700000  -0.82062597
  0.54700000  -0.82062911
  0.54700000  -0.82063224
  0.54700000  -0.82063536
  0.54700000  -0.82063849
  0.54700000  -0.82064160
  0.54700000  -0.82064471
  0.54700000  -0.82064782
  0.54700000  -0.82065092
  0.54700000  -0.82065402
  0.54700000  -0.82065711
  0.54700000  -0.82066019
  0.54700000  -0.82066328
  0.54700000  -0.82066635
  0.54700000  -0.82066943
  0.54700000  -0.82067249
  0.54700000  -0.82067555
  0.54700000  -0.82067861
  0.54700000  -0.82068166
  0.54700000  -0.82068471
  0.54700000  -0.82068776
  0.54700000  -0.82069079
  0.54700000  -0.82069383
  0.54700000  -0.82069686
  0.54750000  -0.82060068
  0.54750000  -0.82060389
  0.54750000  -0.82060709
  0.54750000  -0.82061028
  0.54750000  -0.82061348
  0.54750000  -0.82061666
  0.54750000  -0.82061984
  0.54750000  -0.82062302
  0.54750000  -0.82062619
  0.54750000  -0.82062935
  0.54750000  -0.82063251
  0.54750000  -0.82063567
  0.54750000  -0.82063881
  0.54750000  -0.82064196
  0.54750000  -0.82064510
  0.54750000  -0.82064823
  0.54750000  -0.82065136
  0.54750000  -0.82065449
  0.54750000  -0.82065761
  0.54750000  -0.82066072
  0.54750000  -0.82066383
  0.54750000  -0.82066694
  0.54750000  -0.82067003
  0.54750000  -0.82067313
  0.54750000  -0.82067622
  0.54750000  -0.82067930
  0.54750000  -0.82068238
  0.54750000  -0.82068546
  0.54750000  -0.82068853
  0.54750000  -0.82069159
  0.54750000  -0.82069465
  0.54750000  -0.82069771
  0.54750000  -0.82070076
  0.54750000  -0.82070381
  0.54750000  -0.82070685
  0.54750000  -0.82070988
  0.54750000  -0.82071292
  0.54750000  -0.82071594
  0.54750000  -0.82071897
  0.54750000  -0.82072198
  0.54800000  -0.82062615
  0.54800000  -0.82062935
  0.54800000  -0.82063254
  0.54800000  -0.82063572
  0.54800000  -0.82063890
  0.54800000  -0.82064207
  0.54800000  -0.82064524
  0.54800000  -0.82064840
  0.54800000  -0.82065156
  0.54800000  -0.82065471
  0.54800000  -0.82065786
  0.54800000  -0.82066101
  0.54800000  -0.82066414
  0.54800000  -0.82066728
  0.54800000  -0.82067040
  0.54800000  -0.82067353
  0.54800000  -0.82067664
  0.54800000  -0.82067976
  0.54800000  -0.82068287
  0.54800000  -0.82068597
  0.54800000  -0.82068907
  0.54800000  -0.82069216
  0.54800000  -0.82069525
  0.54800000  -0.82069833
  0.54800000  -0.82070141
  0.54800000  -0.82070448
  0.54800000  -0.82070755
  0.54800000  -0.82071061
  0.54800000  -0.82071367
  0.54800000  -0.82071673
  0.54800000  -0.82071977
  0.54800000  -0.82072282
  0.54800000  -0.82072586
  0.54800000  -0.82072889
  0.54800000  -0.82073192
  0.54800000  -0.82073495
  0.54800000  -0.82073797
  0.54800000  -0.82074098
  0.54800000  -0.82074399
  0.54800000  -0.82074700
  0.54850000  -0.82065151
  0.54850000  -0.82065470
  0.54850000  -0.82065787
  0.54850000  -0.82066104
  0.54850000  -0.82066421
  0.54850000  -0.82066737
  0.54850000  -0.82067053
  0.54850000  -0.82067368
  0.54850000  -0.82067683
  0.54850000  -0.82067997
  0.54850000  -0.82068311
  0.54850000  -0.82068624
  0.54850000  -0.82068936
  0.54850000  -0.82069248
  0.54850000  -0.82069560
  0.54850000  -0.82069871
  0.54850000  -0.82070182
  0.54850000  -0.82070492
  0.54850000  -0.82070801
  0.54850000  -0.82071111
  0.54850000  -0.82071419
  0.54850000  -0.82071727
  0.54850000  -0.82072035
  0.54850000  -0.82072342
  0.54850000  -0.82072649
  0.54850000  -0.82072955
  0.54850000  -0.82073261
  0.54850000  -0.82073566
  0.54850000  -0.82073871
  0.54850000  -0.82074175
  0.54850000  -0.82074479
  0.54850000  -0.82074782
  0.54850000  -0.82075085
  0.54850000  -0.82075387
  0.54850000  -0.82075689
  0.54850000  -0.82075990
  0.54850000  -0.82076291
  0.54850000  -0.82076591
  0.54850000  -0.82076891
  0.54850000  -0.82077191
  0.54900000  -0.82067676
  0.54900000  -0.82067993
  0.54900000  -0.82068310
  0.54900000  -0.82068626
  0.54900000  -0.82068942
  0.54900000  -0.82069257
  0.54900000  -0.82069571
  0.54900000  -0.82069885
  0.54900000  -0.82070198
  0.54900000  -0.82070511
  0.54900000  -0.82070824
  0.54900000  -0.82071136
  0.54900000  -0.82071447
  0.54900000  -0.82071758
  0.54900000  -0.82072069
  0.54900000  -0.82072379
  0.54900000  -0.82072688
  0.54900000  -0.82072997
  0.54900000  -0.82073305
  0.54900000  -0.82073613
  0.54900000  -0.82073921
  0.54900000  -0.82074228
  0.54900000  -0.82074534
  0.54900000  -0.82074840
  0.54900000  -0.82075146
  0.54900000  -0.82075451
  0.54900000  -0.82075755
  0.54900000  -0.82076059
  0.54900000  -0.82076363
  0.54900000  -0.82076666
  0.54900000  -0.82076969
  0.54900000  -0.82077271
  0.54900000  -0.82077573
  0.54900000  -0.82077874
  0.54900000  -0.82078174
  0.54900000  -0.82078475
  0.54900000  -0.82078775
  0.54900000  -0.82079074
  0.54900000  -0.82079373
  0.54900000  -0.82079671
  0.54950000  -0.82070191
  0.54950000  -0.82070507
  0.54950000  -0.82070822
  0.54950000  -0.82071137
  0.54950000  -0.82071451
  0.54950000  -0.82071765
  0.54950000  -0.82072078
  0.54950000  -0.82072391
  0.54950000  -0.82072703
  0.54950000  -0.82073015
  0.54950000  -0.82073326
  0.54950000  -0.82073637
  0.54950000  -0.82073947
  0.54950000  -0.82074257
  0.54950000  -0.82074566
  0.54950000  -0.82074875
  0.54950000  -0.82075183
  0.54950000  -0.82075491
  0.54950000  -0.82075799
  0.54950000  -0.82076105
  0.54950000  -0.82076412
  0.54950000  -0.82076718
  0.54950000  -0.82077023
  0.54950000  -0.82077328
  0.54950000  -0.82077632
  0.54950000  -0.82077936
  0.54950000  -0.82078239
  0.54950000  -0.82078542
  0.54950000  -0.82078845
  0.54950000  -0.82079147
  0.54950000  -0.82079448
  0.54950000  -0.82079749
  0.54950000  -0.82080050
  0.54950000  -0.82080350
  0.54950000  -0.82080649
  0.54950000  -0.82080949
  0.54950000  -0.82081247
  0.54950000  -0.82081545
  0.54950000  -0.82081843
  0.54950000  -0.82082140
  0.55000000  -0.82072694
  0.55000000  -0.82073009
  0.55000000  -0.82073323
  0.55000000  -0.82073636
  0.55000000  -0.82073950
  0.55000000  -0.82074262
  0.55000000  -0.82074574
  0.55000000  -0.82074886
  0.55000000  -0.82075197
  0.55000000  -0.82075508
  0.55000000  -0.82075818
  0.55000000  -0.82076128
  0.55000000  -0.82076437
  0.55000000  -0.82076745
  0.55000000  -0.82077053
  0.55000000  -0.82077361
  0.55000000  -0.82077668
  0.55000000  -0.82077975
  0.55000000  -0.82078281
  0.55000000  -0.82078587
  0.55000000  -0.82078892
  0.55000000  -0.82079196
  0.55000000  -0.82079501
  0.55000000  -0.82079804
  0.55000000  -0.82080108
  0.55000000  -0.82080410
  0.55000000  -0.82080713
  0.55000000  -0.82081014
  0.55000000  -0.82081316
  0.55000000  -0.82081617
  0.55000000  -0.82081917
  0.55000000  -0.82082217
  0.55000000  -0.82082516
  0.55000000  -0.82082815
  0.55000000  -0.82083114
  0.55000000  -0.82083412
  0.55000000  -0.82083709
  0.55000000  -0.82084006
  0.55000000  -0.82084303
  0.55000000  -0.82084599
  0.55050000  -0.82075186
  0.55050000  -0.82075500
  0.55050000  -0.82075813
  0.55050000  -0.82076125
  0.55050000  -0.82076437
  0.55050000  -0.82076749
  0.55050000  -0.82077060
  0.55050000  -0.82077370
  0.55050000  -0.82077680
  0.55050000  -0.82077990
  0.55050000  -0.82078299
  0.55050000  -0.82078607
  0.55050000  -0.82078915
  0.55050000  -0.82079223
  0.55050000  -0.82079530
  0.55050000  -0.82079836
  0.55050000  -0.82080142
  0.55050000  -0.82080448
  0.55050000  -0.82080753
  0.55050000  -0.82081057
  0.55050000  -0.82081361
  0.55050000  -0.82081665
  0.55050000  -0.82081968
  0.55050000  -0.82082270
  0.55050000  -0.82082572
  0.55050000  -0.82082874
  0.55050000  -0.82083175
  0.55050000  -0.82083476
  0.55050000  -0.82083776
  0.55050000  -0.82084076
  0.55050000  -0.82084375
  0.55050000  -0.82084674
  0.55050000  -0.82084972
  0.55050000  -0.82085270
  0.55050000  -0.82085567
  0.55050000  -0.82085864
  0.55050000  -0.82086160
  0.55050000  -0.82086456
  0.55050000  -0.82086752
  0.55050000  -0.82087047
  0.55100000  -0.82077668
  0.55100000  -0.82077981
  0.55100000  -0.82078292
  0.55100000  -0.82078604
  0.55100000  -0.82078914
  0.55100000  -0.82079225
  0.55100000  -0.82079535
  0.55100000  -0.82079844
  0.55100000  -0.82080153
  0.55100000  -0.82080461
  0.55100000  -0.82080769
  0.55100000  -0.82081076
  0.55100000  -0.82081383
  0.55100000  -0.82081689
  0.55100000  -0.82081995
  0.55100000  -0.82082300
  0.55100000  -0.82082605
  0.55100000  -0.82082910
  0.55100000  -0.82083213
  0.55100000  -0.82083517
  0.55100000  -0.82083820
  0.55100000  -0.82084122
  0.55100000  -0.82084424
  0.55100000  -0.82084725
  0.55100000  -0.82085026
  0.55100000  -0.82085327
  0.55100000  -0.82085627
  0.55100000  -0.82085926
  0.55100000  -0.82086225
  0.55100000  -0.82086524
  0.55100000  -0.82086822
  0.55100000  -0.82087120
  0.55100000  -0.82087417
  0.55100000  -0.82087714
  0.55100000  -0.82088010
  0.55100000  -0.82088306
  0.55100000  -0.82088601
  0.55100000  -0.82088896
  0.55100000  -0.82089190
  0.55100000  -0.82089484
  0.55150000  -0.82080139
  0.55150000  -0.82080450
  0.55150000  -0.82080761
  0.55150000  -0.82081071
  0.55150000  -0.82081381
  0.55150000  -0.82081690
  0.55150000  -0.82081999
  0.55150000  -0.82082307
  0.55150000  -0.82082614
  0.55150000  -0.82082922
  0.55150000  -0.82083228
  0.55150000  -0.82083534
  0.55150000  -0.82083840
  0.55150000  -0.82084145
  0.55150000  -0.82084450
  0.55150000  -0.82084754
  0.55150000  -0.82085058
  0.55150000  -0.82085361
  0.55150000  -0.82085664
  0.55150000  -0.82085966
  0.55150000  -0.82086268
  0.55150000  -0.82086569
  0.55150000  -0.82086870
  0.55150000  -0.82087170
  0.55150000  -0.82087470
  0.55150000  -0.82087769
  0.55150000  -0.82088068
  0.55150000  -0.82088366
  0.55150000  -0.82088664
  0.55150000  -0.82088962
  0.55150000  -0.82089259
  0.55150000  -0.82089555
  0.55150000  -0.82089851
  0.55150000  -0.82090147
  0.55150000  -0.82090442
  0.55150000  -0.82090737
  0.55150000  -0.82091031
  0.55150000  -0.82091325
  0.55150000  -0.82091618
  0.55150000  -0.82091911
  0.55200000  -0.82082600
  0.55200000  -0.82082910
  0.55200000  -0.82083219
  0.55200000  -0.82083528
  0.55200000  -0.82083836
  0.55200000  -0.82084144
  0.55200000  -0.82084452
  0.55200000  -0.82084759
  0.55200000  -0.82085065
  0.55200000  -0.82085371
  0.55200000  -0.82085677
  0.55200000  -0.82085982
  0.55200000  -0.82086286
  0.55200000  -0.82086590
  0.55200000  -0.82086894
  0.55200000  -0.82087197
  0.55200000  -0.82087500
  0.55200000  -0.82087802
  0.55200000  -0.82088103
  0.55200000  -0.82088404
  0.55200000  -0.82088705
  0.55200000  -0.82089005
  0.55200000  -0.82089305
  0.55200000  -0.82089604
  0.55200000  -0.82089903
  0.55200000  -0.82090201
  0.55200000  -0.82090499
  0.55200000  -0.82090796
  0.55200000  -0.82091093
  0.55200000  -0.82091389
  0.55200000  -0.82091685
  0.55200000  -0.82091980
  0.55200000  -0.82092275
  0.55200000  -0.82092570
  0.55200000  -0.82092864
  0.55200000  -0.82093157
  0.55200000  -0.82093450
  0.55200000  -0.82093743
  0.55200000  -0.82094035
  0.55200000  -0.82094327
  0.55250000  -0.82085049
  0.55250000  -0.82085358
  0.55250000  -0.82085666
  0.55250000  -0.82085974
  0.55250000  -0.82086282
  0.55250000  -0.82086588
  0.55250000  -0.82086895
  0.55250000  -0.82087201
  0.55250000  -0.82087506
  0.55250000  -0.82087811
  0.55250000  -0.82088115
  0.55250000  -0.82088419
  0.55250000  -0.82088722
  0.55250000  -0.82089025
  0.55250000  -0.82089328
  0.55250000  -0.82089629
  0.55250000  -0.82089931
  0.55250000  -0.82090232
  0.55250000  -0.82090532
  0.55250000  -0.82090832
  0.55250000  -0.82091132
  0.55250000  -0.82091431
  0.55250000  -0.82091729
  0.55250000  -0.82092027
  0.55250000  -0.82092325
  0.55250000  -0.82092622
  0.55250000  -0.82092919
  0.55250000  -0.82093215
  0.55250000  -0.82093511
  0.55250000  -0.82093806
  0.55250000  -0.82094101
  0.55250000  -0.82094395
  0.55250000  -0.82094689
  0.55250000  -0.82094982
  0.55250000  -0.82095275
  0.55250000  -0.82095567
  0.55250000  -0.82095859
  0.55250000  -0.82096151
  0.55250000  -0.82096442
  0.55250000  -0.82096733
  0.55300000  -0.82087488
  0.55300000  -0.82087796
  0.55300000  -0.82088103
  0.55300000  -0.82088410
  0.55300000  -0.82088716
  0.55300000  -0.82089022
  0.55300000  -0.82089327
  0.55300000  -0.82089632
  0.55300000  -0.82089936
  0.55300000  -0.82090239
  0.55300000  -0.82090543
  0.55300000  -0.82090845
  0.55300000  -0.82091148
  0.55300000  -0.82091449
  0.55300000  -0.82091751
  0.55300000  -0.82092051
  0.55300000  -0.82092352
  0.55300000  -0.82092651
  0.55300000  -0.82092951
  0.55300000  -0.82093250
  0.55300000  -0.82093548
  0.55300000  -0.82093846
  0.55300000  -0.82094143
  0.55300000  -0.82094440
  0.55300000  -0.82094737
  0.55300000  -0.82095033
  0.55300000  -0.82095328
  0.55300000  -0.82095623
  0.55300000  -0.82095918
  0.55300000  -0.82096212
  0.55300000  -0.82096506
  0.55300000  -0.82096799
  0.55300000  -0.82097092
  0.55300000  -0.82097384
  0.55300000  -0.82097676
  0.55300000  -0.82097967
  0.55300000  -0.82098258
  0.55300000  -0.82098548
  0.55300000  -0.82098838
  0.55300000  -0.82099128
  0.55350000  -0.82089917
  0.55350000  -0.82090223
  0.55350000  -0.82090529
  0.55350000  -0.82090835
  0.55350000  -0.82091140
  0.55350000  -0.82091444
  0.55350000  -0.82091748
  0.55350000  -0.82092052
  0.55350000  -0.82092355
  0.55350000  -0.82092658
  0.55350000  -0.82092960
  0.55350000  -0.82093261
  0.55350000  -0.82093562
  0.55350000  -0.82093863
  0.55350000  -0.82094163
  0.55350000  -0.82094463
  0.55350000  -0.82094762
  0.55350000  -0.82095061
  0.55350000  -0.82095359
  0.55350000  -0.82095657
  0.55350000  -0.82095954
  0.55350000  -0.82096251
  0.55350000  -0.82096547
  0.55350000  -0.82096843
  0.55350000  -0.82097138
  0.55350000  -0.82097433
  0.55350000  -0.82097727
  0.55350000  -0.82098021
  0.55350000  -0.82098315
  0.55350000  -0.82098608
  0.55350000  -0.82098900
  0.55350000  -0.82099192
  0.55350000  -0.82099484
  0.55350000  -0.82099775
  0.55350000  -0.82100066
  0.55350000  -0.82100356
  0.55350000  -0.82100646
  0.55350000  -0.82100935
  0.55350000  -0.82101224
  0.55350000  -0.82101513
  0.55400000  -0.82092335
  0.55400000  -0.82092640
  0.55400000  -0.82092945
  0.55400000  -0.82093249
  0.55400000  -0.82093553
  0.55400000  -0.82093857
  0.55400000  -0.82094160
  0.55400000  -0.82094462
  0.55400000  -0.82094764
  0.55400000  -0.82095065
  0.55400000  -0.82095366
  0.55400000  -0.82095667
  0.55400000  -0.82095967
  0.55400000  -0.82096266
  0.55400000  -0.82096565
  0.55400000  -0.82096864
  0.55400000  -0.82097162
  0.55400000  -0.82097459
  0.55400000  -0.82097756
  0.55400000  -0.82098053
  0.55400000  -0.82098349
  0.55400000  -0.82098645
  0.55400000  -0.82098940
  0.55400000  -0.82099235
  0.55400000  -0.82099529
  0.55400000  -0.82099823
  0.55400000  -0.82100116
  0.55400000  -0.82100409
  0.55400000  -0.82100701
  0.55400000  -0.82100993
  0.55400000  -0.82101285
  0.55400000  -0.82101576
  0.55400000  -0.82101866
  0.55400000  -0.82102156
  0.55400000  -0.82102446
  0.55400000  -0.82102735
  0.55400000  -0.82103024
  0.55400000  -0.82103312
  0.55400000  -0.82103600
  0.55400000  -0.82103887
  0.55450000  -0.82094742
  0.55450000  -0.82095047
  0.55450000  -0.82095350
  0.55450000  -0.82095654
  0.55450000  -0.82095956
  0.55450000  -0.82096259
  0.55450000  -0.82096560
  0.55450000  -0.82096862
  0.55450000  -0.82097162
  0.55450000  -0.82097463
  0.55450000  -0.82097762
  0.55450000  -0.82098062
  0.55450000  -0.82098361
  0.55450000  -0.82098659
  0.55450000  -0.82098957
  0.55450000  -0.82099254
  0.55450000  -0.82099551
  0.55450000  -0.82099848
  0.55450000  -0.82100144
  0.55450000  -0.82100439
  0.55450000  -0.82100734
  0.55450000  -0.82101029
  0.55450000  -0.82101323
  0.55450000  -0.82101616
  0.55450000  -0.82101909
  0.55450000  -0.82102202
  0.55450000  -0.82102494
  0.55450000  -0.82102786
  0.55450000  -0.82103077
  0.55450000  -0.82103368
  0.55450000  -0.82103659
  0.55450000  -0.82103948
  0.55450000  -0.82104238
  0.55450000  -0.82104527
  0.55450000  -0.82104815
  0.55450000  -0.82105103
  0.55450000  -0.82105391
  0.55450000  -0.82105678
  0.55450000  -0.82105965
  0.55450000  -0.82106251
  0.55500000  -0.82097139
  0.55500000  -0.82097443
  0.55500000  -0.82097745
  0.55500000  -0.82098047
  0.55500000  -0.82098349
  0.55500000  -0.82098650
  0.55500000  -0.82098951
  0.55500000  -0.82099251
  0.55500000  -0.82099550
  0.55500000  -0.82099850
  0.55500000  -0.82100148
  0.55500000  -0.82100446
  0.55500000  -0.82100744
  0.55500000  -0.82101041
  0.55500000  -0.82101338
  0.55500000  -0.82101634
  0.55500000  -0.82101930
  0.55500000  -0.82102226
  0.55500000  -0.82102520
  0.55500000  -0.82102815
  0.55500000  -0.82103109
  0.55500000  -0.82103402
  0.55500000  -0.82103695
  0.55500000  -0.82103988
  0.55500000  -0.82104280
  0.55500000  -0.82104571
  0.55500000  -0.82104862
  0.55500000  -0.82105153
  0.55500000  -0.82105443
  0.55500000  -0.82105733
  0.55500000  -0.82106022
  0.55500000  -0.82106311
  0.55500000  -0.82106599
  0.55500000  -0.82106887
  0.55500000  -0.82107175
  0.55500000  -0.82107462
  0.55500000  -0.82107748
  0.55500000  -0.82108034
  0.55500000  -0.82108320
  0.55500000  -0.82108605
  0.55550000  -0.82099526
  0.55550000  -0.82099828
  0.55550000  -0.82100130
  0.55550000  -0.82100431
  0.55550000  -0.82100731
  0.55550000  -0.82101031
  0.55550000  -0.82101331
  0.55550000  -0.82101630
  0.55550000  -0.82101928
  0.55550000  -0.82102226
  0.55550000  -0.82102524
  0.55550000  -0.82102821
  0.55550000  -0.82103117
  0.55550000  -0.82103414
  0.55550000  -0.82103709
  0.55550000  -0.82104004
  0.55550000  -0.82104299
  0.55550000  -0.82104593
  0.55550000  -0.82104887
  0.55550000  -0.82105180
  0.55550000  -0.82105473
  0.55550000  -0.82105765
  0.55550000  -0.82106057
  0.55550000  -0.82106349
  0.55550000  -0.82106640
  0.55550000  -0.82106930
  0.55550000  -0.82107220
  0.55550000  -0.82107510
  0.55550000  -0.82107799
  0.55550000  -0.82108087
  0.55550000  -0.82108375
  0.55550000  -0.82108663
  0.55550000  -0.82108950
  0.55550000  -0.82109237
  0.55550000  -0.82109524
  0.55550000  -0.82109809
  0.55550000  -0.82110095
  0.55550000  -0.82110380
  0.55550000  -0.82110664
  0.55550000  -0.82110949
  0.55600000  -0.82101903
  0.55600000  -0.82102203
  0.55600000  -0.82102504
  0.55600000  -0.82102804
  0.55600000  -0.82103103
  0.55600000  -0.82103402
  0.55600000  -0.82103700
  0.55600000  -0.82103998
  0.55600000  -0.82104295
  0.55600000  -0.82104592
  0.55600000  -0.82104889
  0.55600000  -0.82105185
  0.55600000  -0.82105480
  0.55600000  -0.82105775
  0.55600000  -0.82106070
  0.55600000  -0.82106364
  0.55600000  -0.82106657
  0.55600000  -0.82106951
  0.55600000  -0.82107243
  0.55600000  -0.82107535
  0.55600000  -0.82107827
  0.55600000  -0.82108118
  0.55600000  -0.82108409
  0.55600000  -0.82108699
  0.55600000  -0.82108989
  0.55600000  -0.82109279
  0.55600000  -0.82109568
  0.55600000  -0.82109856
  0.55600000  -0.82110144
  0.55600000  -0.82110431
  0.55600000  -0.82110719
  0.55600000  -0.82111005
  0.55600000  -0.82111291
  0.55600000  -0.82111577
  0.55600000  -0.82111862
  0.55600000  -0.82112147
  0.55600000  -0.82112432
  0.55600000  -0.82112715
  0.55600000  -0.82112999
  0.55600000  -0.82113282
  0.55650000  -0.82104269
  0.55650000  -0.82104568
  0.55650000  -0.82104868
  0.55650000  -0.82105166
  0.55650000  -0.82105465
  0.55650000  -0.82105762
  0.55650000  -0.82106060
  0.55650000  -0.82106356
  0.55650000  -0.82106653
  0.55650000  -0.82106948
  0.55650000  -0.82107244
  0.55650000  -0.82107539
  0.55650000  -0.82107833
  0.55650000  -0.82108127
  0.55650000  -0.82108420
  0.55650000  -0.82108713
  0.55650000  -0.82109006
  0.55650000  -0.82109298
  0.55650000  -0.82109589
  0.55650000  -0.82109880
  0.55650000  -0.82110171
  0.55650000  -0.82110461
  0.55650000  -0.82110751
  0.55650000  -0.82111040
  0.55650000  -0.82111329
  0.55650000  -0.82111617
  0.55650000  -0.82111905
  0.55650000  -0.82112192
  0.55650000  -0.82112479
  0.55650000  -0.82112766
  0.55650000  -0.82113052
  0.55650000  -0.82113337
  0.55650000  -0.82113622
  0.55650000  -0.82113907
  0.55650000  -0.82114191
  0.55650000  -0.82114475
  0.55650000  -0.82114758
  0.55650000  -0.82115041
  0.55650000  -0.82115323
  0.55650000  -0.82115605
  0.55700000  -0.82106625
  0.55700000  -0.82106923
  0.55700000  -0.82107221
  0.55700000  -0.82107519
  0.55700000  -0.82107816
  0.55700000  -0.82108113
  0.55700000  -0.82108409
  0.55700000  -0.82108704
  0.55700000  -0.82109000
  0.55700000  -0.82109294
  0.55700000  -0.82109588
  0.55700000  -0.82109882
  0.55700000  -0.82110175
  0.55700000  -0.82110468
  0.55700000  -0.82110761
  0.55700000  -0.82111052
  0.55700000  -0.82111344
  0.55700000  -0.82111635
  0.55700000  -0.82111925
  0.55700000  -0.82112215
  0.55700000  -0.82112505
  0.55700000  -0.82112794
  0.55700000  -0.82113082
  0.55700000  -0.82113370
  0.55700000  -0.82113658
  0.55700000  -0.82113945
  0.55700000  -0.82114232
  0.55700000  -0.82114518
  0.55700000  -0.82114804
  0.55700000  -0.82115089
  0.55700000  -0.82115374
  0.55700000  -0.82115659
  0.55700000  -0.82115943
  0.55700000  -0.82116226
  0.55700000  -0.82116509
  0.55700000  -0.82116792
  0.55700000  -0.82117074
  0.55700000  -0.82117356
  0.55700000  -0.82117637
  0.55700000  -0.82117918
  0.55750000  -0.82108970
  0.55750000  -0.82109268
  0.55750000  -0.82109565
  0.55750000  -0.82109861
  0.55750000  -0.82110157
  0.55750000  -0.82110453
  0.55750000  -0.82110748
  0.55750000  -0.82111042
  0.55750000  -0.82111336
  0.55750000  -0.82111630
  0.55750000  -0.82111923
  0.55750000  -0.82112216
  0.55750000  -0.82112508
  0.55750000  -0.82112799
  0.55750000  -0.82113091
  0.55750000  -0.82113381
  0.55750000  -0.82113672
  0.55750000  -0.82113962
  0.55750000  -0.82114251
  0.55750000  -0.82114540
  0.55750000  -0.82114828
  0.55750000  -0.82115116
  0.55750000  -0.82115404
  0.55750000  -0.82115691
  0.55750000  -0.82115977
  0.55750000  -0.82116263
  0.55750000  -0.82116549
  0.55750000  -0.82116834
  0.55750000  -0.82117119
  0.55750000  -0.82117403
  0.55750000  -0.82117687
  0.55750000  -0.82117970
  0.55750000  -0.82118253
  0.55750000  -0.82118536
  0.55750000  -0.82118818
  0.55750000  -0.82119100
  0.55750000  -0.82119381
  0.55750000  -0.82119661
  0.55750000  -0.82119942
  0.55750000  -0.82120221
  0.55800000  -0.82111306
  0.55800000  -0.82111602
  0.55800000  -0.82111898
  0.55800000  -0.82112193
  0.55800000  -0.82112488
  0.55800000  -0.82112783
  0.55800000  -0.82113077
  0.55800000  -0.82113370
  0.55800000  -0.82113663
  0.55800000  -0.82113955
  0.55800000  -0.82114247
  0.55800000  -0.82114539
  0.55800000  -0.82114830
  0.55800000  -0.82115121
  0.55800000  -0.82115411
  0.55800000  -0.82115700
  0.55800000  -0.82115990
  0.55800000  -0.82116278
  0.55800000  -0.82116566
  0.55800000  -0.82116854
  0.55800000  -0.82117142
  0.55800000  -0.82117428
  0.55800000  -0.82117715
  0.55800000  -0.82118001
  0.55800000  -0.82118286
  0.55800000  -0.82118571
  0.55800000  -0.82118856
  0.55800000  -0.82119140
  0.55800000  -0.82119424
  0.55800000  -0.82119707
  0.55800000  -0.82119990
  0.55800000  -0.82120272
  0.55800000  -0.82120554
  0.55800000  -0.82120835
  0.55800000  -0.82121116
  0.55800000  -0.82121397
  0.55800000  -0.82121677
  0.55800000  -0.82121957
  0.55800000  -0.82122236
  0.55800000  -0.82122515
  0.55850000  -0.82113631
  0.55850000  -0.82113927
  0.55850000  -0.82114221
  0.55850000  -0.82114515
  0.55850000  -0.82114809
  0.55850000  -0.82115103
  0.55850000  -0.82115395
  0.55850000  -0.82115688
  0.55850000  -0.82115979
  0.55850000  -0.82116271
  0.55850000  -0.82116562
  0.55850000  -0.82116852
  0.55850000  -0.82117142
  0.55850000  -0.82117432
  0.55850000  -0.82117721
  0.55850000  -0.82118009
  0.55850000  -0.82118297
  0.55850000  -0.82118585
  0.55850000  -0.82118872
  0.55850000  -0.82119159
  0.55850000  -0.82119445
  0.55850000  -0.82119731
  0.55850000  -0.82120016
  0.55850000  -0.82120301
  0.55850000  -0.82120585
  0.55850000  -0.82120869
  0.55850000  -0.82121153
  0.55850000  -0.82121436
  0.55850000  -0.82121719
  0.55850000  -0.82122001
  0.55850000  -0.82122282
  0.55850000  -0.82122564
  0.55850000  -0.82122844
  0.55850000  -0.82123125
  0.55850000  -0.82123405
  0.55850000  -0.82123684
  0.55850000  -0.82123963
  0.55850000  -0.82124242
  0.55850000  -0.82124520
  0.55850000  -0.82124798
  0.55900000  -0.82115947
  0.55900000  -0.82116241
  0.55900000  -0.82116534
  0.55900000  -0.82116828
  0.55900000  -0.82117120
  0.55900000  -0.82117412
  0.55900000  -0.82117704
  0.55900000  -0.82117995
  0.55900000  -0.82118286
  0.55900000  -0.82118576
  0.55900000  -0.82118866
  0.55900000  -0.82119155
  0.55900000  -0.82119444
  0.55900000  -0.82119733
  0.55900000  -0.82120021
  0.55900000  -0.82120308
  0.55900000  -0.82120595
  0.55900000  -0.82120882
  0.55900000  -0.82121168
  0.55900000  -0.82121453
  0.55900000  -0.82121738
  0.55900000  -0.82122023
  0.55900000  -0.82122307
  0.55900000  -0.82122591
  0.55900000  -0.82122875
  0.55900000  -0.82123157
  0.55900000  -0.82123440
  0.55900000  -0.82123722
  0.55900000  -0.82124003
  0.55900000  -0.82124284
  0.55900000  -0.82124565
  0.55900000  -0.82124845
  0.55900000  -0.82125125
  0.55900000  -0.82125404
  0.55900000  -0.82125683
  0.55900000  -0.82125962
  0.55900000  -0.82126240
  0.55900000  -0.82126517
  0.55900000  -0.82126794
  0.55900000  -0.82127071
  0.55950000  -0.82118252
  0.55950000  -0.82118545
  0.55950000  -0.82118837
  0.55950000  -0.82119129
  0.55950000  -0.82119421
  0.55950000  -0.82119712
  0.55950000  -0.82120003
  0.55950000  -0.82120293
  0.55950000  -0.82120582
  0.55950000  -0.82120872
  0.55950000  -0.82121160
  0.55950000  -0.82121449
  0.55950000  -0.82121736
  0.55950000  -0.82122024
  0.55950000  -0.82122311
  0.55950000  -0.82122597
  0.55950000  -0.82122883
  0.55950000  -0.82123168
  0.55950000  -0.82123453
  0.55950000  -0.82123738
  0.55950000  -0.82124022
  0.55950000  -0.82124306
  0.55950000  -0.82124589
  0.55950000  -0.82124871
  0.55950000  -0.82125154
  0.55950000  -0.82125435
  0.55950000  -0.82125717
  0.55950000  -0.82125998
  0.55950000  -0.82126278
  0.55950000  -0.82126558
  0.55950000  -0.82126838
  0.55950000  -0.82127117
  0.55950000  -0.82127396
  0.55950000  -0.82127674
  0.55950000  -0.82127952
  0.55950000  -0.82128229
  0.55950000  -0.82128506
  0.55950000  -0.82128782
  0.55950000  -0.82129059
  0.55950000  -0.82129334
  0.56000000  -0.82120547
  0.56000000  -0.82120839
  0.56000000  -0.82121131
  0.56000000  -0.82121422
  0.56000000  -0.82121712
  0.56000000  -0.82122002
  0.56000000  -0.82122291
  0.56000000  -0.82122580
  0.56000000  -0.82122869
  0.56000000  -0.82123157
  0.56000000  -0.82123445
  0.56000000  -0.82123732
  0.56000000  -0.82124019
  0.56000000  -0.82124305
  0.56000000  -0.82124591
  0.56000000  -0.82124876
  0.56000000  -0.82125161
  0.56000000  -0.82125445
  0.56000000  -0.82125729
  0.56000000  -0.82126012
  0.56000000  -0.82126295
  0.56000000  -0.82126578
  0.56000000  -0.82126860
  0.56000000  -0.82127142
  0.56000000  -0.82127423
  0.56000000  -0.82127704
  0.56000000  -0.82127984
  0.56000000  -0.82128264
  0.56000000  -0.82128543
  0.56000000  -0.82128822
  0.56000000  -0.82129101
  0.56000000  -0.82129379
  0.56000000  -0.82129656
  0.56000000  -0.82129934
  0.56000000  -0.82130210
  0.56000000  -0.82130487
  0.56000000  -0.82130763
  0.56000000  -0.82131038
  0.56000000  -0.82131313
  0.56000000  -0.82131588
  0.56050000  -0.82122833
  0.56050000  -0.82123123
  0.56050000  -0.82123414
  0.56050000  -0.82123704
  0.56050000  -0.82123993
  0.56050000  -0.82124282
  0.56050000  -0.82124570
  0.56050000  -0.82124858
  0.56050000  -0.82125146
  0.56050000  -0.82125433
  0.56050000  -0.82125719
  0.56050000  -0.82126005
  0.56050000  -0.82126291
  0.56050000  -0.82126576
  0.56050000  -0.82126861
  0.56050000  -0.82127145
  0.56050000  -0.82127429
  0.56050000  -0.82127712
  0.56050000  -0.82127995
  0.56050000  -0.82128277
  0.56050000  -0.82128559
  0.56050000  -0.82128841
  0.56050000  -0.82129122
  0.56050000  -0.82129402
  0.56050000  -0.82129682
  0.56050000  -0.82129962
  0.56050000  -0.82130241
  0.56050000  -0.82130520
  0.56050000  -0.82130798
  0.56050000  -0.82131076
  0.56050000  -0.82131354
  0.56050000  -0.82131631
  0.56050000  -0.82131907
  0.56050000  -0.82132184
  0.56050000  -0.82132459
  0.56050000  -0.82132734
  0.56050000  -0.82133009
  0.56050000  -0.82133284
  0.56050000  -0.82133558
  0.56050000  -0.82133831
  0.56100000  -0.82125108
  0.56100000  -0.82125398
  0.56100000  -0.82125687
  0.56100000  -0.82125976
  0.56100000  -0.82126264
  0.56100000  -0.82126552
  0.56100000  -0.82126839
  0.56100000  -0.82127126
  0.56100000  -0.82127412
  0.56100000  -0.82127698
  0.56100000  -0.82127984
  0.56100000  -0.82128269
  0.56100000  -0.82128553
  0.56100000  -0.82128837
  0.56100000  -0.82129121
  0.56100000  -0.82129404
  0.56100000  -0.82129687
  0.56100000  -0.82129969
  0.56100000  -0.82130251
  0.56100000  -0.82130532
  0.56100000  -0.82130813
  0.56100000  -0.82131093
  0.56100000  -0.82131373
  0.56100000  -0.82131653
  0.56100000  -0.82131932
  0.56100000  -0.82132211
  0.56100000  -0.82132489
  0.56100000  -0.82132766
  0.56100000  -0.82133044
  0.56100000  -0.82133321
  0.56100000  -0.82133597
  0.56100000  -0.82133873
  0.56100000  -0.82134149
  0.56100000  -0.82134424
  0.56100000  -0.82134698
  0.56100000  -0.82134973
  0.56100000  -0.82135246
  0.56100000  -0.82135520
  0.56100000  -0.82135793
  0.56100000  -0.82136065
  0.56150000  -0.82127374
  0.56150000  -0.82127662
  0.56150000  -0.82127951
  0.56150000  -0.82128238
  0.56150000  -0.82128525
  0.56150000  -0.82128812
  0.56150000  -0.82129098
  0.56150000  -0.82129384
  0.56150000  -0.82129669
  0.56150000  -0.82129954
  0.56150000  -0.82130239
  0.56150000  -0.82130522
  0.56150000  -0.82130806
  0.56150000  -0.82131089
  0.56150000  -0.82131371
  0.56150000  -0.82131653
  0.56150000  -0.82131935
  0.56150000  -0.82132216
  0.56150000  -0.82132497
  0.56150000  -0.82132777
  0.56150000  -0.82133057
  0.56150000  -0.82133336
  0.56150000  -0.82133615
  0.56150000  -0.82133894
  0.56150000  -0.82134172
  0.56150000  -0.82134449
  0.56150000  -0.82134726
  0.56150000  -0.82135003
  0.56150000  -0.82135279
  0.56150000  -0.82135555
  0.56150000  -0.82135831
  0.56150000  -0.82136105
  0.56150000  -0.82136380
  0.56150000  -0.82136654
  0.56150000  -0.82136928
  0.56150000  -0.82137201
  0.56150000  -0.82137474
  0.56150000  -0.82137746
  0.56150000  -0.82138018
  0.56150000  -0.82138289
  0.56200000  -0.82129630
  0.56200000  -0.82129917
  0.56200000  -0.82130204
  0.56200000  -0.82130491
  0.56200000  -0.82130777
  0.56200000  -0.82131062
  0.56200000  -0.82131348
  0.56200000  -0.82131632
  0.56200000  -0.82131916
  0.56200000  -0.82132200
  0.56200000  -0.82132483
  0.56200000  -0.82132766
  0.56200000  -0.82133049
  0.56200000  -0.82133331
  0.56200000  -0.82133612
  0.56200000  -0.82133893
  0.56200000  -0.82134174
  0.56200000  -0.82134454
  0.56200000  -0.82134733
  0.56200000  -0.82135013
  0.56200000  -0.82135291
  0.56200000  -0.82135570
  0.56200000  -0.82135847
  0.56200000  -0.82136125
  0.56200000  -0.82136402
  0.56200000  -0.82136678
  0.56200000  -0.82136954
  0.56200000  -0.82137230
  0.56200000  -0.82137505
  0.56200000  -0.82137780
  0.56200000  -0.82138054
  0.56200000  -0.82138328
  0.56200000  -0.82138602
  0.56200000  -0.82138875
  0.56200000  -0.82139147
  0.56200000  -0.82139419
  0.56200000  -0.82139691
  0.56200000  -0.82139962
  0.56200000  -0.82140233
  0.56200000  -0.82140504
  0.56250000  -0.82131876
  0.56250000  -0.82132162
  0.56250000  -0.82132448
  0.56250000  -0.82132733
  0.56250000  -0.82133018
  0.56250000  -0.82133303
  0.56250000  -0.82133587
  0.56250000  -0.82133871
  0.56250000  -0.82134154
  0.56250000  -0.82134436
  0.56250000  -0.82134719
  0.56250000  -0.82135000
  0.56250000  -0.82135282
  0.56250000  -0.82135563
  0.56250000  -0.82135843
  0.56250000  -0.82136123
  0.56250000  -0.82136402
  0.56250000  -0.82136681
  0.56250000  -0.82136960
  0.56250000  -0.82137238
  0.56250000  -0.82137516
  0.56250000  -0.82137793
  0.56250000  -0.82138070
  0.56250000  -0.82138346
  0.56250000  -0.82138622
  0.56250000  -0.82138898
  0.56250000  -0.82139173
  0.56250000  -0.82139447
  0.56250000  -0.82139721
  0.56250000  -0.82139995
  0.56250000  -0.82140268
  0.56250000  -0.82140541
  0.56250000  -0.82140814
  0.56250000  -0.82141086
  0.56250000  -0.82141357
  0.56250000  -0.82141628
  0.56250000  -0.82141899
  0.56250000  -0.82142169
  0.56250000  -0.82142439
  0.56250000  -0.82142709
  0.56300000  -0.82134112
  0.56300000  -0.82134397
  0.56300000  -0.82134682
  0.56300000  -0.82134967
  0.56300000  -0.82135250
  0.56300000  -0.82135534
  0.56300000  -0.82135817
  0.56300000  -0.82136099
  0.56300000  -0.82136381
  0.56300000  -0.82136663
  0.56300000  -0.82136944
  0.56300000  -0.82137225
  0.56300000  -0.82137505
  0.56300000  -0.82137785
  0.56300000  -0.82138064
  0.56300000  -0.82138343
  0.56300000  -0.82138622
  0.56300000  -0.82138900
  0.56300000  -0.82139177
  0.56300000  -0.82139454
  0.56300000  -0.82139731
  0.56300000  -0.82140007
  0.56300000  -0.82140283
  0.56300000  -0.82140558
  0.56300000  -0.82140833
  0.56300000  -0.82141107
  0.56300000  -0.82141381
  0.56300000  -0.82141655
  0.56300000  -0.82141928
  0.56300000  -0.82142201
  0.56300000  -0.82142473
  0.56300000  -0.82142745
  0.56300000  -0.82143016
  0.56300000  -0.82143287
  0.56300000  -0.82143558
  0.56300000  -0.82143828
  0.56300000  -0.82144097
  0.56300000  -0.82144367
  0.56300000  -0.82144635
  0.56300000  -0.82144904
  0.56350000  -0.82136339
  0.56350000  -0.82136623
  0.56350000  -0.82136907
  0.56350000  -0.82137190
  0.56350000  -0.82137473
  0.56350000  -0.82137755
  0.56350000  -0.82138037
  0.56350000  -0.82138318
  0.56350000  -0.82138599
  0.56350000  -0.82138880
  0.56350000  -0.82139160
  0.56350000  -0.82139440
  0.56350000  -0.82139719
  0.56350000  -0.82139998
  0.56350000  -0.82140276
  0.56350000  -0.82140554
  0.56350000  -0.82140831
  0.56350000  -0.82141108
  0.56350000  -0.82141385
  0.56350000  -0.82141661
  0.56350000  -0.82141936
  0.56350000  -0.82142211
  0.56350000  -0.82142486
  0.56350000  -0.82142760
  0.56350000  -0.82143034
  0.56350000  -0.82143307
  0.56350000  -0.82143580
  0.56350000  -0.82143853
  0.56350000  -0.82144125
  0.56350000  -0.82144397
  0.56350000  -0.82144668
  0.56350000  -0.82144939
  0.56350000  -0.82145209
  0.56350000  -0.82145479
  0.56350000  -0.82145748
  0.56350000  -0.82146017
  0.56350000  -0.82146286
  0.56350000  -0.82146554
  0.56350000  -0.82146822
  0.56350000  -0.82147089
  0.56400000  -0.82138555
  0.56400000  -0.82138839
  0.56400000  -0.82139121
  0.56400000  -0.82139404
  0.56400000  -0.82139685
  0.56400000  -0.82139967
  0.56400000  -0.82140248
  0.56400000  -0.82140528
  0.56400000  -0.82140808
  0.56400000  -0.82141087
  0.56400000  -0.82141366
  0.56400000  -0.82141645
  0.56400000  -0.82141923
  0.56400000  -0.82142201
  0.56400000  -0.82142478
  0.56400000  -0.82142755
  0.56400000  -0.82143031
  0.56400000  -0.82143307
  0.56400000  -0.82143582
  0.56400000  -0.82143857
  0.56400000  -0.82144132
  0.56400000  -0.82144406
  0.56400000  -0.82144680
  0.56400000  -0.82144953
  0.56400000  -0.82145226
  0.56400000  -0.82145498
  0.56400000  -0.82145770
  0.56400000  -0.82146041
  0.56400000  -0.82146312
  0.56400000  -0.82146583
  0.56400000  -0.82146853
  0.56400000  -0.82147123
  0.56400000  -0.82147392
  0.56400000  -0.82147661
  0.56400000  -0.82147930
  0.56400000  -0.82148198
  0.56400000  -0.82148465
  0.56400000  -0.82148732
  0.56400000  -0.82148999
  0.56400000  -0.82149266
  0.56450000  -0.82140763
  0.56450000  -0.82141045
  0.56450000  -0.82141327
  0.56450000  -0.82141608
  0.56450000  -0.82141888
  0.56450000  -0.82142169
  0.56450000  -0.82142448
  0.56450000  -0.82142728
  0.56450000  -0.82143007
  0.56450000  -0.82143285
  0.56450000  -0.82143563
  0.56450000  -0.82143841
  0.56450000  -0.82144118
  0.56450000  -0.82144394
  0.56450000  -0.82144670
  0.56450000  -0.82144946
  0.56450000  -0.82145221
  0.56450000  -0.82145496
  0.56450000  -0.82145771
  0.56450000  -0.82146045
  0.56450000  -0.82146318
  0.56450000  -0.82146591
  0.56450000  -0.82146864
  0.56450000  -0.82147136
  0.56450000  -0.82147408
  0.56450000  -0.82147679
  0.56450000  -0.82147950
  0.56450000  -0.82148220
  0.56450000  -0.82148490
  0.56450000  -0.82148760
  0.56450000  -0.82149029
  0.56450000  -0.82149298
  0.56450000  -0.82149566
  0.56450000  -0.82149834
  0.56450000  -0.82150101
  0.56450000  -0.82150368
  0.56450000  -0.82150635
  0.56450000  -0.82150901
  0.56450000  -0.82151167
  0.56450000  -0.82151432
  0.56500000  -0.82142961
  0.56500000  -0.82143242
  0.56500000  -0.82143522
  0.56500000  -0.82143802
  0.56500000  -0.82144082
  0.56500000  -0.82144361
  0.56500000  -0.82144640
  0.56500000  -0.82144918
  0.56500000  -0.82145196
  0.56500000  -0.82145473
  0.56500000  -0.82145750
  0.56500000  -0.82146027
  0.56500000  -0.82146303
  0.56500000  -0.82146578
  0.56500000  -0.82146853
  0.56500000  -0.82147128
  0.56500000  -0.82147402
  0.56500000  -0.82147676
  0.56500000  -0.82147949
  0.56500000  -0.82148222
  0.56500000  -0.82148495
  0.56500000  -0.82148767
  0.56500000  -0.82149038
  0.56500000  -0.82149309
  0.56500000  -0.82149580
  0.56500000  -0.82149850
  0.56500000  -0.82150120
  0.56500000  -0.82150390
  0.56500000  -0.82150659
  0.56500000  -0.82150927
  0.56500000  -0.82151195
  0.56500000  -0.82151463
  0.56500000  -0.82151730
  0.56500000  -0.82151997
  0.56500000  -0.82152264
  0.56500000  -0.82152530
  0.56500000  -0.82152795
  0.56500000  -0.82153060
  0.56500000  -0.82153325
  0.56500000  -0.82153589
  0.56550000  -0.82145149
  0.56550000  -0.82145429
  0.56550000  -0.82145708
  0.56550000  -0.82145987
  0.56550000  -0.82146266
  0.56550000  -0.82146544
  0.56550000  -0.82146822
  0.56550000  -0.82147099
  0.56550000  -0.82147376
  0.56550000  -0.82147652
  0.56550000  -0.82147928
  0.56550000  -0.82148203
  0.56550000  -0.82148478
  0.56550000  -0.82148753
  0.56550000  -0.82149027
  0.56550000  -0.82149300
  0.56550000  -0.82149574
  0.56550000  -0.82149846
  0.56550000  -0.82150119
  0.56550000  -0.82150390
  0.56550000  -0.82150662
  0.56550000  -0.82150933
  0.56550000  -0.82151203
  0.56550000  -0.82151474
  0.56550000  -0.82151743
  0.56550000  -0.82152012
  0.56550000  -0.82152281
  0.56550000  -0.82152550
  0.56550000  -0.82152818
  0.56550000  -0.82153085
  0.56550000  -0.82153352
  0.56550000  -0.82153619
  0.56550000  -0.82153885
  0.56550000  -0.82154151
  0.56550000  -0.82154416
  0.56550000  -0.82154681
  0.56550000  -0.82154946
  0.56550000  -0.82155210
  0.56550000  -0.82155474
  0.56550000  -0.82155737
  0.56600000  -0.82147327
  0.56600000  -0.82147606
  0.56600000  -0.82147885
  0.56600000  -0.82148163
  0.56600000  -0.82148440
  0.56600000  -0.82148717
  0.56600000  -0.82148994
  0.56600000  -0.82149270
  0.56600000  -0.82149546
  0.56600000  -0.82149821
  0.56600000  -0.82150096
  0.56600000  -0.82150370
  0.56600000  -0.82150644
  0.56600000  -0.82150918
  0.56600000  -0.82151191
  0.56600000  -0.82151463
  0.56600000  -0.82151735
  0.56600000  -0.82152007
  0.56600000  -0.82152278
  0.56600000  -0.82152549
  0.56600000  -0.82152820
  0.56600000  -0.82153090
  0.56600000  -0.82153359
  0.56600000  -0.82153628
  0.56600000  -0.82153897
  0.56600000  -0.82154165
  0.56600000  -0.82154433
  0.56600000  -0.82154700
  0.56600000  -0.82154967
  0.56600000  -0.82155234
  0.56600000  -0.82155500
  0.56600000  -0.82155766
  0.56600000  -0.82156031
  0.56600000  -0.82156296
  0.56600000  -0.82156560
  0.56600000  -0.82156824
  0.56600000  -0.82157087
  0.56600000  -0.82157351
  0.56600000  -0.82157613
  0.56600000  -0.82157876
  0.56650000  -0.82149497
  0.56650000  -0.82149775
  0.56650000  -0.82150052
  0.56650000  -0.82150329
  0.56650000  -0.82150605
  0.56650000  -0.82150881
  0.56650000  -0.82151157
  0.56650000  -0.82151432
  0.56650000  -0.82151707
  0.56650000  -0.82151981
  0.56650000  -0.82152255
  0.56650000  -0.82152528
  0.56650000  -0.82152801
  0.56650000  -0.82153073
  0.56650000  -0.82153345
  0.56650000  -0.82153617
  0.56650000  -0.82153888
  0.56650000  -0.82154159
  0.56650000  -0.82154429
  0.56650000  -0.82154699
  0.56650000  -0.82154968
  0.56650000  -0.82155237
  0.56650000  -0.82155506
  0.56650000  -0.82155774
  0.56650000  -0.82156041
  0.56650000  -0.82156308
  0.56650000  -0.82156575
  0.56650000  -0.82156842
  0.56650000  -0.82157107
  0.56650000  -0.82157373
  0.56650000  -0.82157638
  0.56650000  -0.82157903
  0.56650000  -0.82158167
  0.56650000  -0.82158431
  0.56650000  -0.82158694
  0.56650000  -0.82158957
  0.56650000  -0.82159220
  0.56650000  -0.82159482
  0.56650000  -0.82159744
  0.56650000  -0.82160005
  0.56700000  -0.82151657
  0.56700000  -0.82151933
  0.56700000  -0.82152210
  0.56700000  -0.82152486
  0.56700000  -0.82152761
  0.56700000  -0.82153036
  0.56700000  -0.82153310
  0.56700000  -0.82153585
  0.56700000  -0.82153858
  0.56700000  -0.82154131
  0.56700000  -0.82154404
  0.56700000  -0.82154676
  0.56700000  -0.82154948
  0.56700000  -0.82155220
  0.56700000  -0.82155491
  0.56700000  -0.82155761
  0.56700000  -0.82156031
  0.56700000  -0.82156301
  0.56700000  -0.82156570
  0.56700000  -0.82156839
  0.56700000  -0.82157107
  0.56700000  -0.82157375
  0.56700000  -0.82157643
  0.56700000  -0.82157910
  0.56700000  -0.82158176
  0.56700000  -0.82158442
  0.56700000  -0.82158708
  0.56700000  -0.82158973
  0.56700000  -0.82159238
  0.56700000  -0.82159503
  0.56700000  -0.82159767
  0.56700000  -0.82160031
  0.56700000  -0.82160294
  0.56700000  -0.82160557
  0.56700000  -0.82160819
  0.56700000  -0.82161081
  0.56700000  -0.82161342
  0.56700000  -0.82161604
  0.56700000  -0.82161864
  0.56700000  -0.82162125
  0.56750000  -0.82153807
  0.56750000  -0.82154083
  0.56750000  -0.82154358
  0.56750000  -0.82154633
  0.56750000  -0.82154907
  0.56750000  -0.82155181
  0.56750000  -0.82155455
  0.56750000  -0.82155728
  0.56750000  -0.82156000
  0.56750000  -0.82156272
  0.56750000  -0.82156544
  0.56750000  -0.82156815
  0.56750000  -0.82157086
  0.56750000  -0.82157357
  0.56750000  -0.82157626
  0.56750000  -0.82157896
  0.56750000  -0.82158165
  0.56750000  -0.82158434
  0.56750000  -0.82158702
  0.56750000  -0.82158970
  0.56750000  -0.82159237
  0.56750000  -0.82159504
  0.56750000  -0.82159770
  0.56750000  -0.82160036
  0.56750000  -0.82160302
  0.56750000  -0.82160567
  0.56750000  -0.82160832
  0.56750000  -0.82161096
  0.56750000  -0.82161360
  0.56750000  -0.82161623
  0.56750000  -0.82161887
  0.56750000  -0.82162149
  0.56750000  -0.82162411
  0.56750000  -0.82162673
  0.56750000  -0.82162935
  0.56750000  -0.82163196
  0.56750000  -0.82163456
  0.56750000  -0.82163716
  0.56750000  -0.82163976
  0.56750000  -0.82164235
  0.56800000  -0.82155948
  0.56800000  -0.82156223
  0.56800000  -0.82156497
  0.56800000  -0.82156771
  0.56800000  -0.82157044
  0.56800000  -0.82157317
  0.56800000  -0.82157590
  0.56800000  -0.82157862
  0.56800000  -0.82158133
  0.56800000  -0.82158404
  0.56800000  -0.82158675
  0.56800000  -0.82158945
  0.56800000  -0.82159215
  0.56800000  -0.82159484
  0.56800000  -0.82159753
  0.56800000  -0.82160022
  0.56800000  -0.82160290
  0.56800000  -0.82160557
  0.56800000  -0.82160824
  0.56800000  -0.82161091
  0.56800000  -0.82161357
  0.56800000  -0.82161623
  0.56800000  -0.82161889
  0.56800000  -0.82162154
  0.56800000  -0.82162418
  0.56800000  -0.82162682
  0.56800000  -0.82162946
  0.56800000  -0.82163209
  0.56800000  -0.82163472
  0.56800000  -0.82163735
  0.56800000  -0.82163997
  0.56800000  -0.82164259
  0.56800000  -0.82164520
  0.56800000  -0.82164781
  0.56800000  -0.82165041
  0.56800000  -0.82165301
  0.56800000  -0.82165560
  0.56800000  -0.82165820
  0.56800000  -0.82166078
  0.56800000  -0.82166337
  0.56850000  -0.82158080
  0.56850000  -0.82158354
  0.56850000  -0.82158627
  0.56850000  -0.82158900
  0.56850000  -0.82159172
  0.56850000  -0.82159444
  0.56850000  -0.82159715
  0.56850000  -0.82159986
  0.56850000  -0.82160257
  0.56850000  -0.82160527
  0.56850000  -0.82160796
  0.56850000  -0.82161066
  0.56850000  -0.82161334
  0.56850000  -0.82161603
  0.56850000  -0.82161870
  0.56850000  -0.82162138
  0.56850000  -0.82162405
  0.56850000  -0.82162671
  0.56850000  -0.82162938
  0.56850000  -0.82163203
  0.56850000  -0.82163469
  0.56850000  -0.82163733
  0.56850000  -0.82163998
  0.56850000  -0.82164262
  0.56850000  -0.82164525
  0.56850000  -0.82164789
  0.56850000  -0.82165051
  0.56850000  -0.82165314
  0.56850000  -0.82165576
  0.56850000  -0.82165837
  0.56850000  -0.82166098
  0.56850000  -0.82166359
  0.56850000  -0.82166619
  0.56850000  -0.82166879
  0.56850000  -0.82167138
  0.56850000  -0.82167397
  0.56850000  -0.82167656
  0.56850000  -0.82167914
  0.56850000  -0.82168172
  0.56850000  -0.82168429
  0.56900000  -0.82160203
  0.56900000  -0.82160475
  0.56900000  -0.82160747
  0.56900000  -0.82161019
  0.56900000  -0.82161290
  0.56900000  -0.82161561
  0.56900000  -0.82161832
  0.56900000  -0.82162101
  0.56900000  -0.82162371
  0.56900000  -0.82162640
  0.56900000  -0.82162909
  0.56900000  -0.82163177
  0.56900000  -0.82163444
  0.56900000  -0.82163712
  0.56900000  -0.82163979
  0.56900000  -0.82164245
  0.56900000  -0.82164511
  0.56900000  -0.82164777
  0.56900000  -0.82165042
  0.56900000  -0.82165306
  0.56900000  -0.82165571
  0.56900000  -0.82165835
  0.56900000  -0.82166098
  0.56900000  -0.82166361
  0.56900000  -0.82166624
  0.56900000  -0.82166886
  0.56900000  -0.82167147
  0.56900000  -0.82167409
  0.56900000  -0.82167670
  0.56900000  -0.82167930
  0.56900000  -0.82168190
  0.56900000  -0.82168450
  0.56900000  -0.82168709
  0.56900000  -0.82168968
  0.56900000  -0.82169226
  0.56900000  -0.82169484
  0.56900000  -0.82169742
  0.56900000  -0.82169999
  0.56900000  -0.82170256
  0.56900000  -0.82170512
  0.56950000  -0.82162316
  0.56950000  -0.82162588
  0.56950000  -0.82162859
  0.56950000  -0.82163129
  0.56950000  -0.82163400
  0.56950000  -0.82163669
  0.56950000  -0.82163939
  0.56950000  -0.82164208
  0.56950000  -0.82164476
  0.56950000  -0.82164744
  0.56950000  -0.82165012
  0.56950000  -0.82165279
  0.56950000  -0.82165546
  0.56950000  -0.82165812
  0.56950000  -0.82166078
  0.56950000  -0.82166343
  0.56950000  -0.82166608
  0.56950000  -0.82166873
  0.56950000  -0.82167137
  0.56950000  -0.82167400
  0.56950000  -0.82167664
  0.56950000  -0.82167926
  0.56950000  -0.82168189
  0.56950000  -0.82168451
  0.56950000  -0.82168712
  0.56950000  -0.82168974
  0.56950000  -0.82169234
  0.56950000  -0.82169495
  0.56950000  -0.82169755
  0.56950000  -0.82170014
  0.56950000  -0.82170273
  0.56950000  -0.82170532
  0.56950000  -0.82170790
  0.56950000  -0.82171048
  0.56950000  -0.82171305
  0.56950000  -0.82171562
  0.56950000  -0.82171819
  0.56950000  -0.82172075
  0.56950000  -0.82172331
  0.56950000  -0.82172586
  0.57000000  -0.82164420
  0.57000000  -0.82164691
  0.57000000  -0.82164961
  0.57000000  -0.82165231
  0.57000000  -0.82165500
  0.57000000  -0.82165768
  0.57000000  -0.82166037
  0.57000000  -0.82166305
  0.57000000  -0.82166572
  0.57000000  -0.82166839
  0.57000000  -0.82167106
  0.57000000  -0.82167372
  0.57000000  -0.82167637
  0.57000000  -0.82167903
  0.57000000  -0.82168167
  0.57000000  -0.82168432
  0.57000000  -0.82168696
  0.57000000  -0.82168959
  0.57000000  -0.82169222
  0.57000000  -0.82169485
  0.57000000  -0.82169747
  0.57000000  -0.82170009
  0.57000000  -0.82170271
  0.57000000  -0.82170532
  0.57000000  -0.82170792
  0.57000000  -0.82171052
  0.57000000  -0.82171312
  0.57000000  -0.82171571
  0.57000000  -0.82171830
  0.57000000  -0.82172089
  0.57000000  -0.82172347
  0.57000000  -0.82172605
  0.57000000  -0.82172862
  0.57000000  -0.82173119
  0.57000000  -0.82173375
  0.57000000  -0.82173631
  0.57000000  -0.82173887
  0.57000000  -0.82174142
  0.57000000  -0.82174397
  0.57000000  -0.82174651
  0.57050000  -0.82166515
  0.57050000  -0.82166785
  0.57050000  -0.82167054
  0.57050000  -0.82167322
  0.57050000  -0.82167591
  0.57050000  -0.82167858
  0.57050000  -0.82168126
  0.57050000  -0.82168393
  0.57050000  -0.82168659
  0.57050000  -0.82168925
  0.57050000  -0.82169190
  0.57050000  -0.82169456
  0.57050000  -0.82169720
  0.57050000  -0.82169984
  0.57050000  -0.82170248
  0.57050000  -0.82170512
  0.57050000  -0.82170775
  0.57050000  -0.82171037
  0.57050000  -0.82171299
  0.57050000  -0.82171561
  0.57050000  -0.82171822
  0.57050000  -0.82172083
  0.57050000  -0.82172343
  0.57050000  -0.82172603
  0.57050000  -0.82172863
  0.57050000  -0.82173122
  0.57050000  -0.82173381
  0.57050000  -0.82173639
  0.57050000  -0.82173897
  0.57050000  -0.82174155
  0.57050000  -0.82174412
  0.57050000  -0.82174668
  0.57050000  -0.82174925
  0.57050000  -0.82175181
  0.57050000  -0.82175436
  0.57050000  -0.82175691
  0.57050000  -0.82175946
  0.57050000  -0.82176200
  0.57050000  -0.82176454
  0.57050000  -0.82176707
  0.57100000  -0.82168601
  0.57100000  -0.82168870
  0.57100000  -0.82169138
  0.57100000  -0.82169405
  0.57100000  -0.82169673
  0.57100000  -0.82169939
  0.57100000  -0.82170205
  0.57100000  -0.82170471
  0.57100000  -0.82170737
  0.57100000  -0.82171002
  0.57100000  -0.82171266
  0.57100000  -0.82171530
  0.57100000  -0.82171794
  0.57100000  -0.82172057
  0.57100000  -0.82172320
  0.57100000  -0.82172582
  0.57100000  -0.82172844
  0.57100000  -0.82173106
  0.57100000  -0.82173367
  0.57100000  -0.82173628
  0.57100000  -0.82173888
  0.57100000  -0.82174148
  0.57100000  -0.82174407
  0.57100000  -0.82174666
  0.57100000  -0.82174925
  0.57100000  -0.82175183
  0.57100000  -0.82175441
  0.57100000  -0.82175698
  0.57100000  -0.82175955
  0.57100000  -0.82176211
  0.57100000  -0.82176468
  0.57100000  -0.82176723
  0.57100000  -0.82176978
  0.57100000  -0.82177233
  0.57100000  -0.82177488
  0.57100000  -0.82177742
  0.57100000  -0.82177996
  0.57100000  -0.82178249
  0.57100000  -0.82178502
  0.57100000  -0.82178754
  0.57150000  -0.82170678
  0.57150000  -0.82170946
  0.57150000  -0.82171213
  0.57150000  -0.82171479
  0.57150000  -0.82171745
  0.57150000  -0.82172011
  0.57150000  -0.82172276
  0.57150000  -0.82172541
  0.57150000  -0.82172805
  0.57150000  -0.82173069
  0.57150000  -0.82173333
  0.57150000  -0.82173596
  0.57150000  -0.82173859
  0.57150000  -0.82174121
  0.57150000  -0.82174383
  0.57150000  -0.82174644
  0.57150000  -0.82174905
  0.57150000  -0.82175166
  0.57150000  -0.82175426
  0.57150000  -0.82175685
  0.57150000  -0.82175945
  0.57150000  -0.82176203
  0.57150000  -0.82176462
  0.57150000  -0.82176720
  0.57150000  -0.82176977
  0.57150000  -0.82177235
  0.57150000  -0.82177491
  0.57150000  -0.82177748
  0.57150000  -0.82178004
  0.57150000  -0.82178259
  0.57150000  -0.82178514
  0.57150000  -0.82178769
  0.57150000  -0.82179023
  0.57150000  -0.82179277
  0.57150000  -0.82179531
  0.57150000  -0.82179784
  0.57150000  -0.82180037
  0.57150000  -0.82180289
  0.57150000  -0.82180541
  0.57150000  -0.82180792
  0.57200000  -0.82172746
  0.57200000  -0.82173013
  0.57200000  -0.82173279
  0.57200000  -0.82173544
  0.57200000  -0.82173809
  0.57200000  -0.82174074
  0.57200000  -0.82174338
  0.57200000  -0.82174602
  0.57200000  -0.82174865
  0.57200000  -0.82175128
  0.57200000  -0.82175391
  0.57200000  -0.82175653
  0.57200000  -0.82175914
  0.57200000  -0.82176176
  0.57200000  -0.82176436
  0.57200000  -0.82176697
  0.57200000  -0.82176957
  0.57200000  -0.82177216
  0.57200000  -0.82177475
  0.57200000  -0.82177734
  0.57200000  -0.82177992
  0.57200000  -0.82178250
  0.57200000  -0.82178508
  0.57200000  -0.82178765
  0.57200000  -0.82179021
  0.57200000  -0.82179277
  0.57200000  -0.82179533
  0.57200000  -0.82179789
  0.57200000  -0.82180044
  0.57200000  -0.82180298
  0.57200000  -0.82180552
  0.57200000  -0.82180806
  0.57200000  -0.82181059
  0.57200000  -0.82181312
  0.57200000  -0.82181565
  0.57200000  -0.82181817
  0.57200000  -0.82182069
  0.57200000  -0.82182320
  0.57200000  -0.82182571
  0.57200000  -0.82182821
  0.57250000  -0.82174805
  0.57250000  -0.82175070
  0.57250000  -0.82175335
  0.57250000  -0.82175600
  0.57250000  -0.82175864
  0.57250000  -0.82176128
  0.57250000  -0.82176391
  0.57250000  -0.82176654
  0.57250000  -0.82176916
  0.57250000  -0.82177178
  0.57250000  -0.82177439
  0.57250000  -0.82177701
  0.57250000  -0.82177961
  0.57250000  -0.82178221
  0.57250000  -0.82178481
  0.57250000  -0.82178741
  0.57250000  -0.82179000
  0.57250000  -0.82179258
  0.57250000  -0.82179516
  0.57250000  -0.82179774
  0.57250000  -0.82180031
  0.57250000  -0.82180288
  0.57250000  -0.82180545
  0.57250000  -0.82180801
  0.57250000  -0.82181056
  0.57250000  -0.82181311
  0.57250000  -0.82181566
  0.57250000  -0.82181821
  0.57250000  -0.82182075
  0.57250000  -0.82182328
  0.57250000  -0.82182581
  0.57250000  -0.82182834
  0.57250000  -0.82183086
  0.57250000  -0.82183338
  0.57250000  -0.82183590
  0.57250000  -0.82183841
  0.57250000  -0.82184092
  0.57250000  -0.82184342
  0.57250000  -0.82184592
  0.57250000  -0.82184842
  0.57300000  -0.82176855
  0.57300000  -0.82177119
  0.57300000  -0.82177383
  0.57300000  -0.82177647
  0.57300000  -0.82177910
  0.57300000  -0.82178173
  0.57300000  -0.82178435
  0.57300000  -0.82178697
  0.57300000  -0.82178958
  0.57300000  -0.82179219
  0.57300000  -0.82179479
  0.57300000  -0.82179739
  0.57300000  -0.82179999
  0.57300000  -0.82180258
  0.57300000  -0.82180517
  0.57300000  -0.82180775
  0.57300000  -0.82181033
  0.57300000  -0.82181291
  0.57300000  -0.82181548
  0.57300000  -0.82181805
  0.57300000  -0.82182061
  0.57300000  -0.82182317
  0.57300000  -0.82182572
  0.57300000  -0.82182828
  0.57300000  -0.82183082
  0.57300000  -0.82183336
  0.57300000  -0.82183590
  0.57300000  -0.82183844
  0.57300000  -0.82184097
  0.57300000  -0.82184349
  0.57300000  -0.82184601
  0.57300000  -0.82184853
  0.57300000  -0.82185105
  0.57300000  -0.82185356
  0.57300000  -0.82185606
  0.57300000  -0.82185856
  0.57300000  -0.82186106
  0.57300000  -0.82186356
  0.57300000  -0.82186605
  0.57300000  -0.82186853
  0.57350000  -0.82178896
  0.57350000  -0.82179159
  0.57350000  -0.82179422
  0.57350000  -0.82179685
  0.57350000  -0.82179947
  0.57350000  -0.82180209
  0.57350000  -0.82180470
  0.57350000  -0.82180731
  0.57350000  -0.82180991
  0.57350000  -0.82181251
  0.57350000  -0.82181510
  0.57350000  -0.82181769
  0.57350000  -0.82182028
  0.57350000  -0.82182286
  0.57350000  -0.82182544
  0.57350000  -0.82182802
  0.57350000  -0.82183059
  0.57350000  -0.82183315
  0.57350000  -0.82183571
  0.57350000  -0.82183827
  0.57350000  -0.82184082
  0.57350000  -0.82184337
  0.57350000  -0.82184592
  0.57350000  -0.82184846
  0.57350000  -0.82185099
  0.57350000  -0.82185353
  0.57350000  -0.82185606
  0.57350000  -0.82185858
  0.57350000  -0.82186110
  0.57350000  -0.82186362
  0.57350000  -0.82186613
  0.57350000  -0.82186864
  0.57350000  -0.82187114
  0.57350000  -0.82187364
  0.57350000  -0.82187614
  0.57350000  -0.82187863
  0.57350000  -0.82188112
  0.57350000  -0.82188360
  0.57350000  -0.82188608
  0.57350000  -0.82188856
  0.57400000  -0.82180928
  0.57400000  -0.82181191
  0.57400000  -0.82181452
  0.57400000  -0.82181714
  0.57400000  -0.82181975
  0.57400000  -0.82182236
  0.57400000  -0.82182496
  0.57400000  -0.82182756
  0.57400000  -0.82183015
  0.57400000  -0.82183274
  0.57400000  -0.82183532
  0.57400000  -0.82183791
  0.57400000  -0.82184048
  0.57400000  -0.82184306
  0.57400000  -0.82184562
  0.57400000  -0.82184819
  0.57400000  -0.82185075
  0.57400000  -0.82185330
  0.57400000  -0.82185585
  0.57400000  -0.82185840
  0.57400000  -0.82186095
  0.57400000  -0.82186348
  0.57400000  -0.82186602
  0.57400000  -0.82186855
  0.57400000  -0.82187108
  0.57400000  -0.82187360
  0.57400000  -0.82187612
  0.57400000  -0.82187863
  0.57400000  -0.82188115
  0.57400000  -0.82188365
  0.57400000  -0.82188615
  0.57400000  -0.82188865
  0.57400000  -0.82189115
  0.57400000  -0.82189364
  0.57400000  -0.82189613
  0.57400000  -0.82189861
  0.57400000  -0.82190109
  0.57400000  -0.82190356
  0.57400000  -0.82190603
  0.57400000  -0.82190850
  0.57450000  -0.82182951
  0.57450000  -0.82183213
  0.57450000  -0.82183474
  0.57450000  -0.82183734
  0.57450000  -0.82183994
  0.57450000  -0.82184254
  0.57450000  -0.82184513
  0.57450000  -0.82184772
  0.57450000  -0.82185030
  0.57450000  -0.82185288
  0.57450000  -0.82185546
  0.57450000  -0.82185803
  0.57450000  -0.82186060
  0.57450000  -0.82186316
  0.57450000  -0.82186572
  0.57450000  -0.82186827
  0.57450000  -0.82187082
  0.57450000  -0.82187337
  0.57450000  -0.82187591
  0.57450000  -0.82187845
  0.57450000  -0.82188098
  0.57450000  -0.82188351
  0.57450000  -0.82188604
  0.57450000  -0.82188856
  0.57450000  -0.82189107
  0.57450000  -0.82189359
  0.57450000  -0.82189610
  0.57450000  -0.82189860
  0.57450000  -0.82190110
  0.57450000  -0.82190360
  0.57450000  -0.82190609
  0.57450000  -0.82190858
  0.57450000  -0.82191107
  0.57450000  -0.82191355
  0.57450000  -0.82191603
  0.57450000  -0.82191850
  0.57450000  -0.82192097
  0.57450000  -0.82192343
  0.57450000  -0.82192589
  0.57450000  -0.82192835
  0.57500000  -0.82184966
  0.57500000  -0.82185226
  0.57500000  -0.82185486
  0.57500000  -0.82185746
  0.57500000  -0.82186005
  0.57500000  -0.82186264
  0.57500000  -0.82186522
  0.57500000  -0.82186780
  0.57500000  -0.82187037
  0.57500000  -0.82187294
  0.57500000  -0.82187550
  0.57500000  -0.82187807
  0.57500000  -0.82188062
  0.57500000  -0.82188318
  0.57500000  -0.82188572
  0.57500000  -0.82188827
  0.57500000  -0.82189081
  0.57500000  -0.82189335
  0.57500000  -0.82189588
  0.57500000  -0.82189841
  0.57500000  -0.82190093
  0.57500000  -0.82190345
  0.57500000  -0.82190596
  0.57500000  -0.82190848
  0.57500000  -0.82191098
  0.57500000  -0.82191349
  0.57500000  -0.82191599
  0.57500000  -0.82191848
  0.57500000  -0.82192097
  0.57500000  -0.82192346
  0.57500000  -0.82192594
  0.57500000  -0.82192842
  0.57500000  -0.82193090
  0.57500000  -0.82193337
  0.57500000  -0.82193584
  0.57500000  -0.82193830
  0.57500000  -0.82194076
  0.57500000  -0.82194322
  0.57500000  -0.82194567
  0.57500000  -0.82194812
  0.57550000  -0.82186972
  0.57550000  -0.82187231
  0.57550000  -0.82187490
  0.57550000  -0.82187749
  0.57550000  -0.82188007
  0.57550000  -0.82188264
  0.57550000  -0.82188522
  0.57550000  -0.82188778
  0.57550000  -0.82189035
  0.57550000  -0.82189291
  0.57550000  -0.82189546
  0.57550000  -0.82189801
  0.57550000  -0.82190056
  0.57550000  -0.82190310
  0.57550000  -0.82190564
  0.57550000  -0.82190818
  0.57550000  -0.82191071
  0.57550000  -0.82191324
  0.57550000  -0.82191576
  0.57550000  -0.82191828
  0.57550000  -0.82192079
  0.57550000  -0.82192330
  0.57550000  -0.82192581
  0.57550000  -0.82192831
  0.57550000  -0.82193081
  0.57550000  -0.82193330
  0.57550000  -0.82193579
  0.57550000  -0.82193828
  0.57550000  -0.82194076
  0.57550000  -0.82194324
  0.57550000  -0.82194571
  0.57550000  -0.82194818
  0.57550000  -0.82195065
  0.57550000  -0.82195311
  0.57550000  -0.82195557
  0.57550000  -0.82195802
  0.57550000  -0.82196047
  0.57550000  -0.82196292
  0.57550000  -0.82196536
  0.57550000  -0.82196780
  0.57600000  -0.82188969
  0.57600000  -0.82189227
  0.57600000  -0.82189485
  0.57600000  -0.82189743
  0.57600000  -0.82190000
  0.57600000  -0.82190256
  0.57600000  -0.82190513
  0.57600000  -0.82190769
  0.57600000  -0.82191024
  0.57600000  -0.82191279
  0.57600000  -0.82191533
  0.57600000  -0.82191788
  0.57600000  -0.82192041
  0.57600000  -0.82192295
  0.57600000  -0.82192548
  0.57600000  -0.82192800
  0.57600000  -0.82193052
  0.57600000  -0.82193304
  0.57600000  -0.82193555
  0.57600000  -0.82193806
  0.57600000  -0.82194056
  0.57600000  -0.82194307
  0.57600000  -0.82194556
  0.57600000  -0.82194805
  0.57600000  -0.82195054
  0.57600000  -0.82195303
  0.57600000  -0.82195551
  0.57600000  -0.82195798
  0.57600000  -0.82196046
  0.57600000  -0.82196292
  0.57600000  -0.82196539
  0.57600000  -0.82196785
  0.57600000  -0.82197031
  0.57600000  -0.82197276
  0.57600000  -0.82197521
  0.57600000  -0.82197765
  0.57600000  -0.82198009
  0.57600000  -0.82198253
  0.57600000  -0.82198496
  0.57600000  -0.82198739
  0.57650000  -0.82190957
  0.57650000  -0.82191215
  0.57650000  -0.82191472
  0.57650000  -0.82191728
  0.57650000  -0.82191984
  0.57650000  -0.82192240
  0.57650000  -0.82192495
  0.57650000  -0.82192750
  0.57650000  -0.82193004
  0.57650000  -0.82193258
  0.57650000  -0.82193512
  0.57650000  -0.82193765
  0.57650000  -0.82194018
  0.57650000  -0.82194270
  0.57650000  -0.82194522
  0.57650000  -0.82194774
  0.57650000  -0.82195025
  0.57650000  -0.82195276
  0.57650000  -0.82195526
  0.57650000  -0.82195776
  0.57650000  -0.82196025
  0.57650000  -0.82196274
  0.57650000  -0.82196523
  0.57650000  -0.82196771
  0.57650000  -0.82197019
  0.57650000  -0.82197267
  0.57650000  -0.82197514
  0.57650000  -0.82197760
  0.57650000  -0.82198007
  0.57650000  -0.82198253
  0.57650000  -0.82198498
  0.57650000  -0.82198743
  0.57650000  -0.82198988
  0.57650000  -0.82199232
  0.57650000  -0.82199476
  0.57650000  -0.82199720
  0.57650000  -0.82199963
  0.57650000  -0.82200206
  0.57650000  -0.82200448
  0.57650000  -0.82200690
  0.57700000  -0.82192937
  0.57700000  -0.82193193
  0.57700000  -0.82193449
  0.57700000  -0.82193705
  0.57700000  -0.82193960
  0.57700000  -0.82194215
  0.57700000  -0.82194469
  0.57700000  -0.82194723
  0.57700000  -0.82194976
  0.57700000  -0.82195229
  0.57700000  -0.82195482
  0.57700000  -0.82195734
  0.57700000  -0.82195986
  0.57700000  -0.82196237
  0.57700000  -0.82196488
  0.57700000  -0.82196739
  0.57700000  -0.82196989
  0.57700000  -0.82197239
  0.57700000  -0.82197488
  0.57700000  -0.82197737
  0.57700000  -0.82197986
  0.57700000  -0.82198234
  0.57700000  -0.82198481
  0.57700000  -0.82198729
  0.57700000  -0.82198976
  0.57700000  -0.82199222
  0.57700000  -0.82199468
  0.57700000  -0.82199714
  0.57700000  -0.82199959
  0.57700000  -0.82200204
  0.57700000  -0.82200449
  0.57700000  -0.82200693
  0.57700000  -0.82200937
  0.57700000  -0.82201180
  0.57700000  -0.82201423
  0.57700000  -0.82201666
  0.57700000  -0.82201908
  0.57700000  -0.82202150
  0.57700000  -0.82202391
  0.57700000  -0.82202632
  0.57750000  -0.82194908
  0.57750000  -0.82195163
  0.57750000  -0.82195418
  0.57750000  -0.82195673
  0.57750000  -0.82195927
  0.57750000  -0.82196181
  0.57750000  -0.82196434
  0.57750000  -0.82196687
  0.57750000  -0.82196939
  0.57750000  -0.82197192
  0.57750000  -0.82197443
  0.57750000  -0.82197694
  0.57750000  -0.82197945
  0.57750000  -0.82198196
  0.57750000  -0.82198446
  0.57750000  -0.82198695
  0.57750000  -0.82198944
  0.57750000  -0.82199193
  0.57750000  -0.82199442
  0.57750000  -0.82199690
  0.57750000  -0.82199937
  0.57750000  -0.82200184
  0.57750000  -0.82200431
  0.57750000  -0.82200678
  0.57750000  -0.82200924
  0.57750000  -0.82201169
  0.57750000  -0.82201414
  0.57750000  -0.82201659
  0.57750000  -0.82201903
  0.57750000  -0.82202147
  0.57750000  -0.82202391
  0.57750000  -0.82202634
  0.57750000  -0.82202877
  0.57750000  -0.82203120
  0.57750000  -0.82203362
  0.57750000  -0.82203603
  0.57750000  -0.82203845
  0.57750000  -0.82204085
  0.57750000  -0.82204326
  0.57750000  -0.82204566
  0.57800000  -0.82196870
  0.57800000  -0.82197125
  0.57800000  -0.82197379
  0.57800000  -0.82197633
  0.57800000  -0.82197886
  0.57800000  -0.82198138
  0.57800000  -0.82198391
  0.57800000  -0.82198643
  0.57800000  -0.82198894
  0.57800000  -0.82199145
  0.57800000  -0.82199396
  0.57800000  -0.82199646
  0.57800000  -0.82199896
  0.57800000  -0.82200146
  0.57800000  -0.82200395
  0.57800000  -0.82200643
  0.57800000  -0.82200891
  0.57800000  -0.82201139
  0.57800000  -0.82201387
  0.57800000  -0.82201634
  0.57800000  -0.82201880
  0.57800000  -0.82202127
  0.57800000  -0.82202372
  0.57800000  -0.82202618
  0.57800000  -0.82202863
  0.57800000  -0.82203108
  0.57800000  -0.82203352
  0.57800000  -0.82203596
  0.57800000  -0.82203839
  0.57800000  -0.82204082
  0.57800000  -0.82204325
  0.57800000  -0.82204567
  0.57800000  -0.82204809
  0.57800000  -0.82205050
  0.57800000  -0.82205292
  0.57800000  -0.82205532
  0.57800000  -0.82205773
  0.57800000  -0.82206013
  0.57800000  -0.82206252
  0.57800000  -0.82206491
  0.57850000  -0.82198824
  0.57850000  -0.82199078
  0.57850000  -0.82199331
  0.57850000  -0.82199584
  0.57850000  -0.82199836
  0.57850000  -0.82200088
  0.57850000  -0.82200339
  0.57850000  -0.82200590
  0.57850000  -0.82200840
  0.57850000  -0.82201091
  0.57850000  -0.82201340
  0.57850000  -0.82201590
  0.57850000  -0.82201838
  0.57850000  -0.82202087
  0.57850000  -0.82202335
  0.57850000  -0.82202583
  0.57850000  -0.82202830
  0.57850000  -0.82203077
  0.57850000  -0.82203323
  0.57850000  -0.82203569
  0.57850000  -0.82203815
  0.57850000  -0.82204060
  0.57850000  -0.82204305
  0.57850000  -0.82204550
  0.57850000  -0.82204794
  0.57850000  -0.82205038
  0.57850000  -0.82205281
  0.57850000  -0.82205524
  0.57850000  -0.82205766
  0.57850000  -0.82206008
  0.57850000  -0.82206250
  0.57850000  -0.82206491
  0.57850000  -0.82206732
  0.57850000  -0.82206973
  0.57850000  -0.82207213
  0.57850000  -0.82207453
  0.57850000  -0.82207692
  0.57850000  -0.82207931
  0.57850000  -0.82208170
  0.57850000  -0.82208408
  0.57900000  -0.82200770
  0.57900000  -0.82201022
  0.57900000  -0.82201274
  0.57900000  -0.82201526
  0.57900000  -0.82201777
  0.57900000  -0.82202028
  0.57900000  -0.82202279
  0.57900000  -0.82202529
  0.57900000  -0.82202778
  0.57900000  -0.82203027
  0.57900000  -0.82203276
  0.57900000  -0.82203524
  0.57900000  -0.82203772
  0.57900000  -0.82204020
  0.57900000  -0.82204267
  0.57900000  -0.82204514
  0.57900000  -0.82204760
  0.57900000  -0.82205006
  0.57900000  -0.82205252
  0.57900000  -0.82205497
  0.57900000  -0.82205741
  0.57900000  -0.82205986
  0.57900000  -0.82206230
  0.57900000  -0.82206473
  0.57900000  -0.82206716
  0.57900000  -0.82206959
  0.57900000  -0.82207201
  0.57900000  -0.82207443
  0.57900000  -0.82207685
  0.57900000  -0.82207926
  0.57900000  -0.82208167
  0.57900000  -0.82208407
  0.57900000  -0.82208647
  0.57900000  -0.82208887
  0.57900000  -0.82209126
  0.57900000  -0.82209365
  0.57900000  -0.82209604
  0.57900000  -0.82209842
  0.57900000  -0.82210080
  0.57900000  -0.82210317
  0.57950000  -0.82202707
  0.57950000  -0.82202958
  0.57950000  -0.82203210
  0.57950000  -0.82203460
  0.57950000  -0.82203710
  0.57950000  -0.82203960
  0.57950000  -0.82204210
  0.57950000  -0.82204459
  0.57950000  -0.82204707
  0.57950000  -0.82204956
  0.57950000  -0.82205203
  0.57950000  -0.82205451
  0.57950000  -0.82205698
  0.57950000  -0.82205944
  0.57950000  -0.82206191
  0.57950000  -0.82206436
  0.57950000  -0.82206682
  0.57950000  -0.82206927
  0.57950000  -0.82207171
  0.57950000  -0.82207415
  0.57950000  -0.82207659
  0.57950000  -0.82207903
  0.57950000  -0.82208146
  0.57950000  -0.82208388
  0.57950000  -0.82208630
  0.57950000  -0.82208872
  0.57950000  -0.82209114
  0.57950000  -0.82209355
  0.57950000  -0.82209595
  0.57950000  -0.82209836
  0.57950000  -0.82210075
  0.57950000  -0.82210315
  0.57950000  -0.82210554
  0.57950000  -0.82210793
  0.57950000  -0.82211031
  0.57950000  -0.82211269
  0.57950000  -0.82211507
  0.57950000  -0.82211744
  0.57950000  -0.82211981
  0.57950000  -0.82212217
  0.58000000  -0.82204635
  0.58000000  -0.82204886
  0.58000000  -0.82205136
  0.58000000  -0.82205386
  0.58000000  -0.82205635
  0.58000000  -0.82205884
  0.58000000  -0.82206133
  0.58000000  -0.82206381
  0.58000000  -0.82206628
  0.58000000  -0.82206875
  0.58000000  -0.82207122
  0.58000000  -0.82207369
  0.58000000  -0.82207615
  0.58000000  -0.82207860
  0.58000000  -0.82208106
  0.58000000  -0.82208351
  0.58000000  -0.82208595
  0.58000000  -0.82208839
  0.58000000  -0.82209083
  0.58000000  -0.82209326
  0.58000000  -0.82209569
  0.58000000  -0.82209811
  0.58000000  -0.82210053
  0.58000000  -0.82210295
  0.58000000  -0.82210536
  0.58000000  -0.82210777
  0.58000000  -0.82211018
  0.58000000  -0.82211258
  0.58000000  -0.82211497
  0.58000000  -0.82211737
  0.58000000  -0.82211976
  0.58000000  -0.82212214
  0.58000000  -0.82212452
  0.58000000  -0.82212690
  0.58000000  -0.82212928
  0.58000000  -0.82213165
  0.58000000  -0.82213401
  0.58000000  -0.82213638
  0.58000000  -0.82213873
  0.58000000  -0.82214109
  0.58050000  -0.82206556
  0.58050000  -0.82206805
  0.58050000  -0.82207054
  0.58050000  -0.82207303
  0.58050000  -0.82207551
  0.58050000  -0.82207799
  0.58050000  -0.82208047
  0.58050000  -0.82208294
  0.58050000  -0.82208541
  0.58050000  -0.82208787
  0.58050000  -0.82209033
  0.58050000  -0.82209278
  0.58050000  -0.82209523
  0.58050000  -0.82209768
  0.58050000  -0.82210012
  0.58050000  -0.82210256
  0.58050000  -0.82210500
  0.58050000  -0.82210743
  0.58050000  -0.82210986
  0.58050000  -0.82211228
  0.58050000  -0.82211470
  0.58050000  -0.82211711
  0.58050000  -0.82211952
  0.58050000  -0.82212193
  0.58050000  -0.82212434
  0.58050000  -0.82212673
  0.58050000  -0.82212913
  0.58050000  -0.82213152
  0.58050000  -0.82213391
  0.58050000  -0.82213629
  0.58050000  -0.82213867
  0.58050000  -0.82214105
  0.58050000  -0.82214342
  0.58050000  -0.82214579
  0.58050000  -0.82214816
  0.58050000  -0.82215052
  0.58050000  -0.82215288
  0.58050000  -0.82215523
  0.58050000  -0.82215758
  0.58050000  -0.82215993
  0.58100000  -0.82208467
  0.58100000  -0.82208716
  0.58100000  -0.82208964
  0.58100000  -0.82209212
  0.58100000  -0.82209459
  0.58100000  -0.82209706
  0.58100000  -0.82209953
  0.58100000  -0.82210199
  0.58100000  -0.82210445
  0.58100000  -0.82210690
  0.58100000  -0.82210935
  0.58100000  -0.82211180
  0.58100000  -0.82211424
  0.58100000  -0.82211668
  0.58100000  -0.82211911
  0.58100000  -0.82212154
  0.58100000  -0.82212396
  0.58100000  -0.82212639
  0.58100000  -0.82212880
  0.58100000  -0.82213122
  0.58100000  -0.82213363
  0.58100000  -0.82213603
  0.58100000  -0.82213843
  0.58100000  -0.82214083
  0.58100000  -0.82214323
  0.58100000  -0.82214562
  0.58100000  -0.82214800
  0.58100000  -0.82215039
  0.58100000  -0.82215276
  0.58100000  -0.82215514
  0.58100000  -0.82215751
  0.58100000  -0.82215988
  0.58100000  -0.82216224
  0.58100000  -0.82216460
  0.58100000  -0.82216696
  0.58100000  -0.82216931
  0.58100000  -0.82217166
  0.58100000  -0.82217400
  0.58100000  -0.82217634
  0.58100000  -0.82217868
  0.58150000  -0.82210371
  0.58150000  -0.82210619
  0.58150000  -0.82210866
  0.58150000  -0.82211113
  0.58150000  -0.82211359
  0.58150000  -0.82211605
  0.58150000  -0.82211851
  0.58150000  -0.82212096
  0.58150000  -0.82212341
  0.58150000  -0.82212585
  0.58150000  -0.82212829
  0.58150000  -0.82213073
  0.58150000  -0.82213316
  0.58150000  -0.82213559
  0.58150000  -0.82213801
  0.58150000  -0.82214043
  0.58150000  -0.82214285
  0.58150000  -0.82214526
  0.58150000  -0.82214767
  0.58150000  -0.82215007
  0.58150000  -0.82215247
  0.58150000  -0.82215487
  0.58150000  -0.82215726
  0.58150000  -0.82215965
  0.58150000  -0.82216204
  0.58150000  -0.82216442
  0.58150000  -0.82216679
  0.58150000  -0.82216917
  0.58150000  -0.82217154
  0.58150000  -0.82217390
  0.58150000  -0.82217626
  0.58150000  -0.82217862
  0.58150000  -0.82218098
  0.58150000  -0.82218333
  0.58150000  -0.82218567
  0.58150000  -0.82218802
  0.58150000  -0.82219036
  0.58150000  -0.82219269
  0.58150000  -0.82219502
  0.58150000  -0.82219735
  0.58200000  -0.82212266
  0.58200000  -0.82212513
  0.58200000  -0.82212759
  0.58200000  -0.82213005
  0.58200000  -0.82213250
  0.58200000  -0.82213495
  0.58200000  -0.82213740
  0.58200000  -0.82213984
  0.58200000  -0.82214228
  0.58200000  -0.82214472
  0.58200000  -0.82214715
  0.58200000  -0.82214957
  0.58200000  -0.82215200
  0.58200000  -0.82215442
  0.58200000  -0.82215683
  0.58200000  -0.82215924
  0.58200000  -0.82216165
  0.58200000  -0.82216405
  0.58200000  -0.82216645
  0.58200000  -0.82216885
  0.58200000  -0.82217124
  0.58200000  -0.82217362
  0.58200000  -0.82217601
  0.58200000  -0.82217839
  0.58200000  -0.82218076
  0.58200000  -0.82218313
  0.58200000  -0.82218550
  0.58200000  -0.82218787
  0.58200000  -0.82219023
  0.58200000  -0.82219258
  0.58200000  -0.82219494
  0.58200000  -0.82219728
  0.58200000  -0.82219963
  0.58200000  -0.82220197
  0.58200000  -0.82220431
  0.58200000  -0.82220664
  0.58200000  -0.82220897
  0.58200000  -0.82221130
  0.58200000  -0.82221362
  0.58200000  -0.82221594
  0.58250000  -0.82214153
  0.58250000  -0.82214399
  0.58250000  -0.82214644
  0.58250000  -0.82214889
  0.58250000  -0.82215134
  0.58250000  -0.82215378
  0.58250000  -0.82215621
  0.58250000  -0.82215865
  0.58250000  -0.82216108
  0.58250000  -0.82216350
  0.58250000  -0.82216592
  0.58250000  -0.82216834
  0.58250000  -0.82217075
  0.58250000  -0.82217316
  0.58250000  -0.82217557
  0.58250000  -0.82217797
  0.58250000  -0.82218037
  0.58250000  -0.82218276
  0.58250000  -0.82218515
  0.58250000  -0.82218754
  0.58250000  -0.82218992
  0.58250000  -0.82219230
  0.58250000  -0.82219467
  0.58250000  -0.82219704
  0.58250000  -0.82219941
  0.58250000  -0.82220177
  0.58250000  -0.82220413
  0.58250000  -0.82220648
  0.58250000  -0.82220883
  0.58250000  -0.82221118
  0.58250000  -0.82221353
  0.58250000  -0.82221587
  0.58250000  -0.82221820
  0.58250000  -0.82222053
  0.58250000  -0.82222286
  0.58250000  -0.82222519
  0.58250000  -0.82222751
  0.58250000  -0.82222983
  0.58250000  -0.82223214
  0.58250000  -0.82223445
  0.58300000  -0.82216032
  0.58300000  -0.82216276
  0.58300000  -0.82216521
  0.58300000  -0.82216765
  0.58300000  -0.82217008
  0.58300000  -0.82217252
  0.58300000  -0.82217494
  0.58300000  -0.82217737
  0.58300000  -0.82217979
  0.58300000  -0.82218220
  0.58300000  -0.82218462
  0.58300000  -0.82218702
  0.58300000  -0.82218943
  0.58300000  -0.82219183
  0.58300000  -0.82219422
  0.58300000  -0.82219662
  0.58300000  -0.82219900
  0.58300000  -0.82220139
  0.58300000  -0.82220377
  0.58300000  -0.82220614
  0.58300000  -0.82220852
  0.58300000  -0.82221089
  0.58300000  -0.82221325
  0.58300000  -0.82221561
  0.58300000  -0.82221797
  0.58300000  -0.82222032
  0.58300000  -0.82222267
  0.58300000  -0.82222502
  0.58300000  -0.82222736
  0.58300000  -0.82222970
  0.58300000  -0.82223203
  0.58300000  -0.82223436
  0.58300000  -0.82223669
  0.58300000  -0.82223901
  0.58300000  -0.82224133
  0.58300000  -0.82224365
  0.58300000  -0.82224596
  0.58300000  -0.82224827
  0.58300000  -0.82225058
  0.58300000  -0.82225288
  0.58350000  -0.82217902
  0.58350000  -0.82218146
  0.58350000  -0.82218389
  0.58350000  -0.82218633
  0.58350000  -0.82218875
  0.58350000  -0.82219117
  0.58350000  -0.82219359
  0.58350000  -0.82219601
  0.58350000  -0.82219842
  0.58350000  -0.82220082
  0.58350000  -0.82220323
  0.58350000  -0.82220563
  0.58350000  -0.82220802
  0.58350000  -0.82221041
  0.58350000  -0.82221280
  0.58350000  -0.82221518
  0.58350000  -0.82221756
  0.58350000  -0.82221993
  0.58350000  -0.82222231
  0.58350000  -0.82222467
  0.58350000  -0.82222704
  0.58350000  -0.82222940
  0.58350000  -0.82223175
  0.58350000  -0.82223410
  0.58350000  -0.82223645
  0.58350000  -0.82223880
  0.58350000  -0.82224114
  0.58350000  -0.82224347
  0.58350000  -0.82224581
  0.58350000  -0.82224814
  0.58350000  -0.82225046
  0.58350000  -0.82225278
  0.58350000  -0.82225510
  0.58350000  -0.82225742
  0.58350000  -0.82225973
  0.58350000  -0.82226203
  0.58350000  -0.82226434
  0.58350000  -0.82226664
  0.58350000  -0.82226893
  0.58350000  -0.82227122
  0.58400000  -0.82219765
  0.58400000  -0.82220007
  0.58400000  -0.82220250
  0.58400000  -0.82220492
  0.58400000  -0.82220734
  0.58400000  -0.82220975
  0.58400000  -0.82221216
  0.58400000  -0.82221457
  0.58400000  -0.82221697
  0.58400000  -0.82221936
  0.58400000  -0.82222176
  0.58400000  -0.82222415
  0.58400000  -0.82222653
  0.58400000  -0.82222891
  0.58400000  -0.82223129
  0.58400000  -0.82223366
  0.58400000  -0.82223603
  0.58400000  -0.82223840
  0.58400000  -0.82224076
  0.58400000  -0.82224312
  0.58400000  -0.82224547
  0.58400000  -0.82224782
  0.58400000  -0.82225017
  0.58400000  -0.82225251
  0.58400000  -0.82225485
  0.58400000  -0.82225719
  0.58400000  -0.82225952
  0.58400000  -0.82226185
  0.58400000  -0.82226417
  0.58400000  -0.82226649
  0.58400000  -0.82226881
  0.58400000  -0.82227112
  0.58400000  -0.82227343
  0.58400000  -0.82227574
  0.58400000  -0.82227804
  0.58400000  -0.82228033
  0.58400000  -0.82228263
  0.58400000  -0.82228492
  0.58400000  -0.82228721
  0.58400000  -0.82228949
  0.58450000  -0.82221619
  0.58450000  -0.82221861
  0.58450000  -0.82222102
  0.58450000  -0.82222343
  0.58450000  -0.82222584
  0.58450000  -0.82222825
  0.58450000  -0.82223065
  0.58450000  -0.82223304
  0.58450000  -0.82223543
  0.58450000  -0.82223782
  0.58450000  -0.82224021
  0.58450000  -0.82224259
  0.58450000  -0.82224496
  0.58450000  -0.82224733
  0.58450000  -0.82224970
  0.58450000  -0.82225207
  0.58450000  -0.82225443
  0.58450000  -0.82225678
  0.58450000  -0.82225914
  0.58450000  -0.82226149
  0.58450000  -0.82226383
  0.58450000  -0.82226617
  0.58450000  -0.82226851
  0.58450000  -0.82227084
  0.58450000  -0.82227317
  0.58450000  -0.82227550
  0.58450000  -0.82227782
  0.58450000  -0.82228014
  0.58450000  -0.82228246
  0.58450000  -0.82228477
  0.58450000  -0.82228708
  0.58450000  -0.82228938
  0.58450000  -0.82229168
  0.58450000  -0.82229398
  0.58450000  -0.82229627
  0.58450000  -0.82229856
  0.58450000  -0.82230084
  0.58450000  -0.82230312
  0.58450000  -0.82230540
  0.58450000  -0.82230768
  0.58500000  -0.82223465
  0.58500000  -0.82223706
  0.58500000  -0.82223947
  0.58500000  -0.82224187
  0.58500000  -0.82224427
  0.58500000  -0.82224666
  0.58500000  -0.82224905
  0.58500000  -0.82225144
  0.58500000  -0.82225382
  0.58500000  -0.82225620
  0.58500000  -0.82225857
  0.58500000  -0.82226094
  0.58500000  -0.82226331
  0.58500000  -0.82226567
  0.58500000  -0.82226803
  0.58500000  -0.82227039
  0.58500000  -0.82227274
  0.58500000  -0.82227509
  0.58500000  -0.82227743
  0.58500000  -0.82227977
  0.58500000  -0.82228211
  0.58500000  -0.82228444
  0.58500000  -0.82228677
  0.58500000  -0.82228909
  0.58500000  -0.82229141
  0.58500000  -0.82229373
  0.58500000  -0.82229605
  0.58500000  -0.82229836
  0.58500000  -0.82230066
  0.58500000  -0.82230296
  0.58500000  -0.82230526
  0.58500000  -0.82230756
  0.58500000  -0.82230985
  0.58500000  -0.82231214
  0.58500000  -0.82231442
  0.58500000  -0.82231670
  0.58500000  -0.82231898
  0.58500000  -0.82232125
  0.58500000  -0.82232352
  0.58500000  -0.82232578
  0.58550000  -0.82225303
  0.58550000  -0.82225543
  0.58550000  -0.82225783
  0.58550000  -0.82226022
  0.58550000  -0.82226261
  0.58550000  -0.82226500
  0.58550000  -0.82226738
  0.58550000  -0.82226975
  0.58550000  -0.82227213
  0.58550000  -0.82227450
  0.58550000  -0.82227686
  0.58550000  -0.82227922
  0.58550000  -0.82228158
  0.58550000  -0.82228394
  0.58550000  -0.82228629
  0.58550000  -0.82228863
  0.58550000  -0.82229097
  0.58550000  -0.82229331
  0.58550000  -0.82229565
  0.58550000  -0.82229798
  0.58550000  -0.82230031
  0.58550000  -0.82230263
  0.58550000  -0.82230495
  0.58550000  -0.82230726
  0.58550000  -0.82230958
  0.58550000  -0.82231188
  0.58550000  -0.82231419
  0.58550000  -0.82231649
  0.58550000  -0.82231879
  0.58550000  -0.82232108
  0.58550000  -0.82232337
  0.58550000  -0.82232565
  0.58550000  -0.82232794
  0.58550000  -0.82233022
  0.58550000  -0.82233249
  0.58550000  -0.82233476
  0.58550000  -0.82233703
  0.58550000  -0.82233929
  0.58550000  -0.82234155
  0.58550000  -0.82234381
  0.58600000  -0.82227133
  0.58600000  -0.82227372
  0.58600000  -0.82227611
  0.58600000  -0.82227849
  0.58600000  -0.82228087
  0.58600000  -0.82228325
  0.58600000  -0.82228562
  0.58600000  -0.82228799
  0.58600000  -0.82229035
  0.58600000  -0.82229271
  0.58600000  -0.82229507
  0.58600000  -0.82229742
  0.58600000  -0.82229977
  0.58600000  -0.82230212
  0.58600000  -0.82230446
  0.58600000  -0.82230679
  0.58600000  -0.82230913
  0.58600000  -0.82231146
  0.58600000  -0.82231378
  0.58600000  -0.82231610
  0.58600000  -0.82231842
  0.58600000  -0.82232074
  0.58600000  -0.82232305
  0.58600000  -0.82232535
  0.58600000  -0.82232766
  0.58600000  -0.82232996
  0.58600000  -0.82233225
  0.58600000  -0.82233454
  0.58600000  -0.82233683
  0.58600000  -0.82233912
  0.58600000  -0.82234140
  0.58600000  -0.82234367
  0.58600000  -0.82234595
  0.58600000  -0.82234822
  0.58600000  -0.82235048
  0.58600000  -0.82235275
  0.58600000  -0.82235500
  0.58600000  -0.82235726
  0.58600000  -0.82235951
  0.58600000  -0.82236176
  0.58650000  -0.82228955
  0.58650000  -0.82229193
  0.58650000  -0.82229431
  0.58650000  -0.82229669
  0.58650000  -0.82229906
  0.58650000  -0.82230142
  0.58650000  -0.82230379
  0.58650000  -0.82230615
  0.58650000  -0.82230850
  0.58650000  -0.82231085
  0.58650000  -0.82231320
  0.58650000  -0.82231554
  0.58650000  -0.82231788
  0.58650000  -0.82232022
  0.58650000  -0.82232255
  0.58650000  -0.82232488
  0.58650000  -0.82232720
  0.58650000  -0.82232952
  0.58650000  -0.82233184
  0.58650000  -0.82233415
  0.58650000  -0.82233646
  0.58650000  -0.82233877
  0.58650000  -0.82234107
  0.58650000  -0.82234337
  0.58650000  -0.82234566
  0.58650000  -0.82234795
  0.58650000  -0.82235024
  0.58650000  -0.82235252
  0.58650000  -0.82235480
  0.58650000  -0.82235707
  0.58650000  -0.82235935
  0.58650000  -0.82236161
  0.58650000  -0.82236388
  0.58650000  -0.82236614
  0.58650000  -0.82236840
  0.58650000  -0.82237065
  0.58650000  -0.82237290
  0.58650000  -0.82237515
  0.58650000  -0.82237739
  0.58650000  -0.82237963
  0.58700000  -0.82230769
  0.58700000  -0.82231007
  0.58700000  -0.82231244
  0.58700000  -0.82231480
  0.58700000  -0.82231716
  0.58700000  -0.82231952
  0.58700000  -0.82232187
  0.58700000  -0.82232422
  0.58700000  -0.82232657
  0.58700000  -0.82232891
  0.58700000  -0.82233125
  0.58700000  -0.82233358
  0.58700000  -0.82233591
  0.58700000  -0.82233824
  0.58700000  -0.82234056
  0.58700000  -0.82234288
  0.58700000  -0.82234520
  0.58700000  -0.82234751
  0.58700000  -0.82234982
  0.58700000  -0.82235212
  0.58700000  -0.82235442
  0.58700000  -0.82235672
  0.58700000  -0.82235901
  0.58700000  -0.82236130
  0.58700000  -0.82236358
  0.58700000  -0.82236586
  0.58700000  -0.82236814
  0.58700000  -0.82237042
  0.58700000  -0.82237269
  0.58700000  -0.82237495
  0.58700000  -0.82237722
  0.58700000  -0.82237948
  0.58700000  -0.82238173
  0.58700000  -0.82238398
  0.58700000  -0.82238623
  0.58700000  -0.82238848
  0.58700000  -0.82239072
  0.58700000  -0.82239296
  0.58700000  -0.82239519
  0.58700000  -0.82239742
  0.58750000  -0.82232576
  0.58750000  -0.82232812
  0.58750000  -0.82233048
  0.58750000  -0.82233284
  0.58750000  -0.82233519
  0.58750000  -0.82233754
  0.58750000  -0.82233988
  0.58750000  -0.82234222
  0.58750000  -0.82234456
  0.58750000  -0.82234689
  0.58750000  -0.82234922
  0.58750000  -0.82235155
  0.58750000  -0.82235387
  0.58750000  -0.82235618
  0.58750000  -0.82235850
  0.58750000  -0.82236081
  0.58750000  -0.82236311
  0.58750000  -0.82236542
  0.58750000  -0.82236772
  0.58750000  -0.82237001
  0.58750000  -0.82237230
  0.58750000  -0.82237459
  0.58750000  -0.82237687
  0.58750000  -0.82237915
  0.58750000  -0.82238143
  0.58750000  -0.82238370
  0.58750000  -0.82238597
  0.58750000  -0.82238823
  0.58750000  -0.82239050
  0.58750000  -0.82239275
  0.58750000  -0.82239501
  0.58750000  -0.82239726
  0.58750000  -0.82239951
  0.58750000  -0.82240175
  0.58750000  -0.82240399
  0.58750000  -0.82240622
  0.58750000  -0.82240846
  0.58750000  -0.82241069
  0.58750000  -0.82241291
  0.58750000  -0.82241513
  0.58800000  -0.82234374
  0.58800000  -0.82234609
  0.58800000  -0.82234844
  0.58800000  -0.82235079
  0.58800000  -0.82235313
  0.58800000  -0.82235547
  0.58800000  -0.82235781
  0.58800000  -0.82236014
  0.58800000  -0.82236247
  0.58800000  -0.82236479
  0.58800000  -0.82236711
  0.58800000  -0.82236943
  0.58800000  -0.82237174
  0.58800000  -0.82237405
  0.58800000  -0.82237635
  0.58800000  -0.82237866
  0.58800000  -0.82238095
  0.58800000  -0.82238325
  0.58800000  -0.82238554
  0.58800000  -0.82238782
  0.58800000  -0.82239010
  0.58800000  -0.82239238
  0.58800000  -0.82239466
  0.58800000  -0.82239693
  0.58800000  -0.82239920
  0.58800000  -0.82240146
  0.58800000  -0.82240372
  0.58800000  -0.82240598
  0.58800000  -0.82240823
  0.58800000  -0.82241048
  0.58800000  -0.82241272
  0.58800000  -0.82241496
  0.58800000  -0.82241720
  0.58800000  -0.82241944
  0.58800000  -0.82242167
  0.58800000  -0.82242390
  0.58800000  -0.82242612
  0.58800000  -0.82242834
  0.58800000  -0.82243056
  0.58800000  -0.82243277
  0.58850000  -0.82236164
  0.58850000  -0.82236399
  0.58850000  -0.82236633
  0.58850000  -0.82236867
  0.58850000  -0.82237100
  0.58850000  -0.82237333
  0.58850000  -0.82237566
  0.58850000  -0.82237798
  0.58850000  -0.82238030
  0.58850000  -0.82238262
  0.58850000  -0.82238493
  0.58850000  -0.82238723
  0.58850000  -0.82238954
  0.58850000  -0.82239184
  0.58850000  -0.82239413
  0.58850000  -0.82239642
  0.58850000  -0.82239871
  0.58850000  -0.82240100
  0.58850000  -0.82240328
  0.58850000  -0.82240555
  0.58850000  -0.82240783
  0.58850000  -0.82241010
  0.58850000  -0.82241236
  0.58850000  -0.82241463
  0.58850000  -0.82241688
  0.58850000  -0.82241914
  0.58850000  -0.82242139
  0.58850000  -0.82242364
  0.58850000  -0.82242588
  0.58850000  -0.82242812
  0.58850000  -0.82243036
  0.58850000  -0.82243259
  0.58850000  -0.82243482
  0.58850000  -0.82243705
  0.58850000  -0.82243927
  0.58850000  -0.82244149
  0.58850000  -0.82244370
  0.58850000  -0.82244592
  0.58850000  -0.82244812
  0.58850000  -0.82245033
  0.58900000  -0.82237947
  0.58900000  -0.82238181
  0.58900000  -0.82238414
  0.58900000  -0.82238647
  0.58900000  -0.82238879
  0.58900000  -0.82239111
  0.58900000  -0.82239343
  0.58900000  -0.82239575
  0.58900000  -0.82239805
  0.58900000  -0.82240036
  0.58900000  -0.82240266
  0.58900000  -0.82240496
  0.58900000  -0.82240726
  0.58900000  -0.82240955
  0.58900000  -0.82241183
  0.58900000  -0.82241412
  0.58900000  -0.82241640
  0.58900000  -0.82241867
  0.58900000  -0.82242094
  0.58900000  -0.82242321
  0.58900000  -0.82242548
  0.58900000  -0.82242774
  0.58900000  -0.82242999
  0.58900000  -0.82243225
  0.58900000  -0.82243450
  0.58900000  -0.82243674
  0.58900000  -0.82243898
  0.58900000  -0.82244122
  0.58900000  -0.82244346
  0.58900000  -0.82244569
  0.58900000  -0.82244792
  0.58900000  -0.82245014
  0.58900000  -0.82245236
  0.58900000  -0.82245458
  0.58900000  -0.82245679
  0.58900000  -0.82245900
  0.58900000  -0.82246121
  0.58900000  -0.82246341
  0.58900000  -0.82246561
  0.58900000  -0.82246781
  0.58950000  -0.82239722
  0.58950000  -0.82239955
  0.58950000  -0.82240187
  0.58950000  -0.82240419
  0.58950000  -0.82240651
  0.58950000  -0.82240882
  0.58950000  -0.82241113
  0.58950000  -0.82241343
  0.58950000  -0.82241573
  0.58950000  -0.82241803
  0.58950000  -0.82242032
  0.58950000  -0.82242261
  0.58950000  -0.82242490
  0.58950000  -0.82242718
  0.58950000  -0.82242946
  0.58950000  -0.82243173
  0.58950000  -0.82243400
  0.58950000  -0.82243627
  0.58950000  -0.82243853
  0.58950000  -0.82244079
  0.58950000  -0.82244305
  0.58950000  -0.82244530
  0.58950000  -0.82244755
  0.58950000  -0.82244979
  0.58950000  -0.82245203
  0.58950000  -0.82245427
  0.58950000  -0.82245650
  0.58950000  -0.82245873
  0.58950000  -0.82246096
  0.58950000  -0.82246318
  0.58950000  -0.82246540
  0.58950000  -0.82246762
  0.58950000  -0.82246983
  0.58950000  -0.82247204
  0.58950000  -0.82247424
  0.58950000  -0.82247644
  0.58950000  -0.82247864
  0.58950000  -0.82248084
  0.58950000  -0.82248303
  0.58950000  -0.82248521
  0.59000000  -0.82241489
  0.59000000  -0.82241721
  0.59000000  -0.82241952
  0.59000000  -0.82242183
  0.59000000  -0.82242414
  0.59000000  -0.82242644
  0.59000000  -0.82242874
  0.59000000  -0.82243104
  0.59000000  -0.82243333
  0.59000000  -0.82243562
  0.59000000  -0.82243790
  0.59000000  -0.82244018
  0.59000000  -0.82244246
  0.59000000  -0.82244473
  0.59000000  -0.82244700
  0.59000000  -0.82244927
  0.59000000  -0.82245153
  0.59000000  -0.82245379
  0.59000000  -0.82245604
  0.59000000  -0.82245829
  0.59000000  -0.82246054
  0.59000000  -0.82246278
  0.59000000  -0.82246502
  0.59000000  -0.82246726
  0.59000000  -0.82246949
  0.59000000  -0.82247172
  0.59000000  -0.82247394
  0.59000000  -0.82247616
  0.59000000  -0.82247838
  0.59000000  -0.82248060
  0.59000000  -0.82248281
  0.59000000  -0.82248501
  0.59000000  -0.82248722
  0.59000000  -0.82248942
  0.59000000  -0.82249161
  0.59000000  -0.82249381
  0.59000000  -0.82249600
  0.59000000  -0.82249818
  0.59000000  -0.82250036
  0.59000000  -0.82250254
  0.59050000  -0.82243248
  0.59050000  -0.82243479
  0.59050000  -0.82243710
  0.59050000  -0.82243940
  0.59050000  -0.82244170
  0.59050000  -0.82244399
  0.59050000  -0.82244628
  0.59050000  -0.82244857
  0.59050000  -0.82245085
  0.59050000  -0.82245313
  0.59050000  -0.82245541
  0.59050000  -0.82245768
  0.59050000  -0.82245995
  0.59050000  -0.82246221
  0.59050000  -0.82246447
  0.59050000  -0.82246673
  0.59050000  -0.82246898
  0.59050000  -0.82247123
  0.59050000  -0.82247347
  0.59050000  -0.82247572
  0.59050000  -0.82247795
  0.59050000  -0.82248019
  0.59050000  -0.82248242
  0.59050000  -0.82248465
  0.59050000  -0.82248687
  0.59050000  -0.82248909
  0.59050000  -0.82249131
  0.59050000  -0.82249352
  0.59050000  -0.82249573
  0.59050000  -0.82249793
  0.59050000  -0.82250014
  0.59050000  -0.82250233
  0.59050000  -0.82250453
  0.59050000  -0.82250672
  0.59050000  -0.82250891
  0.59050000  -0.82251109
  0.59050000  -0.82251327
  0.59050000  -0.82251545
  0.59050000  -0.82251762
  0.59050000  -0.82251979
  0.59100000  -0.82245000
  0.59100000  -0.82245230
  0.59100000  -0.82245460
  0.59100000  -0.82245689
  0.59100000  -0.82245918
  0.59100000  -0.82246147
  0.59100000  -0.82246375
  0.59100000  -0.82246603
  0.59100000  -0.82246830
  0.59100000  -0.82247057
  0.59100000  -0.82247284
  0.59100000  -0.82247510
  0.59100000  -0.82247736
  0.59100000  -0.82247961
  0.59100000  -0.82248186
  0.59100000  -0.82248411
  0.59100000  -0.82248636
  0.59100000  -0.82248860
  0.59100000  -0.82249083
  0.59100000  -0.82249307
  0.59100000  -0.82249529
  0.59100000  -0.82249752
  0.59100000  -0.82249974
  0.59100000  -0.82250196
  0.59100000  -0.82250418
  0.59100000  -0.82250639
  0.59100000  -0.82250859
  0.59100000  -0.82251080
  0.59100000  -0.82251300
  0.59100000  -0.82251520
  0.59100000  -0.82251739
  0.59100000  -0.82251958
  0.59100000  -0.82252177
  0.59100000  -0.82252395
  0.59100000  -0.82252613
  0.59100000  -0.82252830
  0.59100000  -0.82253048
  0.59100000  -0.82253264
  0.59100000  -0.82253481
  0.59100000  -0.82253697
  0.59150000  -0.82246744
  0.59150000  -0.82246973
  0.59150000  -0.82247202
  0.59150000  -0.82247431
  0.59150000  -0.82247659
  0.59150000  -0.82247886
  0.59150000  -0.82248113
  0.59150000  -0.82248340
  0.59150000  -0.82248567
  0.59150000  -0.82248793
  0.59150000  -0.82249019
  0.59150000  -0.82249244
  0.59150000  -0.82249469
  0.59150000  -0.82249694
  0.59150000  -0.82249918
  0.59150000  -0.82250142
  0.59150000  -0.82250365
  0.59150000  -0.82250589
  0.59150000  -0.82250811
  0.59150000  -0.82251034
  0.59150000  -0.82251256
  0.59150000  -0.82251478
  0.59150000  -0.82251699
  0.59150000  -0.82251920
  0.59150000  -0.82252141
  0.59150000  -0.82252361
  0.59150000  -0.82252581
  0.59150000  -0.82252800
  0.59150000  -0.82253019
  0.59150000  -0.82253238
  0.59150000  -0.82253457
  0.59150000  -0.82253675
  0.59150000  -0.82253893
  0.59150000  -0.82254110
  0.59150000  -0.82254327
  0.59150000  -0.82254544
  0.59150000  -0.82254760
  0.59150000  -0.82254976
  0.59150000  -0.82255192
  0.59150000  -0.82255407
  0.59200000  -0.82248481
  0.59200000  -0.82248709
  0.59200000  -0.82248937
  0.59200000  -0.82249164
  0.59200000  -0.82249391
  0.59200000  -0.82249618
  0.59200000  -0.82249845
  0.59200000  -0.82250071
  0.59200000  -0.82250296
  0.59200000  -0.82250521
  0.59200000  -0.82250746
  0.59200000  -0.82250971
  0.59200000  -0.82251195
  0.59200000  -0.82251419
  0.59200000  -0.82251642
  0.59200000  -0.82251865
  0.59200000  -0.82252088
  0.59200000  -0.82252310
  0.59200000  -0.82252532
  0.59200000  -0.82252754
  0.59200000  -0.82252975
  0.59200000  -0.82253196
  0.59200000  -0.82253416
  0.59200000  -0.82253636
  0.59200000  -0.82253856
  0.59200000  -0.82254075
  0.59200000  -0.82254294
  0.59200000  -0.82254513
  0.59200000  -0.82254731
  0.59200000  -0.82254949
  0.59200000  -0.82255167
  0.59200000  -0.82255384
  0.59200000  -0.82255601
  0.59200000  -0.82255818
  0.59200000  -0.82256034
  0.59200000  -0.82256250
  0.59200000  -0.82256465
  0.59200000  -0.82256681
  0.59200000  -0.82256895
  0.59200000  -0.82257110
  0.59250000  -0.82250210
  0.59250000  -0.82250437
  0.59250000  -0.82250664
  0.59250000  -0.82250891
  0.59250000  -0.82251117
  0.59250000  -0.82251343
  0.59250000  -0.82251568
  0.59250000  -0.82251793
  0.59250000  -0.82252018
  0.59250000  -0.82252242
  0.59250000  -0.82252466
  0.59250000  -0.82252690
  0.59250000  -0.82252913
  0.59250000  -0.82253136
  0.59250000  -0.82253359
  0.59250000  -0.82253581
  0.59250000  -0.82253803
  0.59250000  -0.82254024
  0.59250000  -0.82254245
  0.59250000  -0.82254466
  0.59250000  -0.82254686
  0.59250000  -0.82254906
  0.59250000  -0.82255126
  0.59250000  -0.82255345
  0.59250000  -0.82255564
  0.59250000  -0.82255782
  0.59250000  -0.82256001
  0.59250000  -0.82256218
  0.59250000  -0.82256436
  0.59250000  -0.82256653
  0.59250000  -0.82256870
  0.59250000  -0.82257086
  0.59250000  -0.82257302
  0.59250000  -0.82257518
  0.59250000  -0.82257733
  0.59250000  -0.82257948
  0.59250000  -0.82258163
  0.59250000  -0.82258377
  0.59250000  -0.82258591
  0.59250000  -0.82258805
  0.59300000  -0.82251931
  0.59300000  -0.82252157
  0.59300000  -0.82252383
  0.59300000  -0.82252609
  0.59300000  -0.82252835
  0.59300000  -0.82253060
  0.59300000  -0.82253284
  0.59300000  -0.82253508
  0.59300000  -0.82253732
  0.59300000  -0.82253956
  0.59300000  -0.82254179
  0.59300000  -0.82254402
  0.59300000  -0.82254624
  0.59300000  -0.82254846
  0.59300000  -0.82255068
  0.59300000  -0.82255289
  0.59300000  -0.82255510
  0.59300000  -0.82255730
  0.59300000  -0.82255951
  0.59300000  -0.82256170
  0.59300000  -0.82256390
  0.59300000  -0.82256609
  0.59300000  -0.82256828
  0.59300000  -0.82257046
  0.59300000  -0.82257264
  0.59300000  -0.82257482
  0.59300000  -0.82257699
  0.59300000  -0.82257916
  0.59300000  -0.82258133
  0.59300000  -0.82258349
  0.59300000  -0.82258565
  0.59300000  -0.82258781
  0.59300000  -0.82258996
  0.59300000  -0.82259211
  0.59300000  -0.82259425
  0.59300000  -0.82259639
  0.59300000  -0.82259853
  0.59300000  -0.82260067
  0.59300000  -0.82260280
  0.59300000  -0.82260493
  0.59350000  -0.82253645
  0.59350000  -0.82253870
  0.59350000  -0.82254095
  0.59350000  -0.82254320
  0.59350000  -0.82254545
  0.59350000  -0.82254769
  0.59350000  -0.82254993
  0.59350000  -0.82255216
  0.59350000  -0.82255439
  0.59350000  -0.82255662
  0.59350000  -0.82255884
  0.59350000  -0.82256106
  0.59350000  -0.82256327
  0.59350000  -0.82256548
  0.59350000  -0.82256769
  0.59350000  -0.82256990
  0.59350000  -0.82257210
  0.59350000  -0.82257429
  0.59350000  -0.82257649
  0.59350000  -0.82257868
  0.59350000  -0.82258086
  0.59350000  -0.82258304
  0.59350000  -0.82258522
  0.59350000  -0.82258740
  0.59350000  -0.82258957
  0.59350000  -0.82259174
  0.59350000  -0.82259390
  0.59350000  -0.82259607
  0.59350000  -0.82259822
  0.59350000  -0.82260038
  0.59350000  -0.82260253
  0.59350000  -0.82260468
  0.59350000  -0.82260682
  0.59350000  -0.82260896
  0.59350000  -0.82261110
  0.59350000  -0.82261323
  0.59350000  -0.82261536
  0.59350000  -0.82261749
  0.59350000  -0.82261961
  0.59350000  -0.82262173
  0.59400000  -0.82255351
  0.59400000  -0.82255576
  0.59400000  -0.82255800
  0.59400000  -0.82256024
  0.59400000  -0.82256248
  0.59400000  -0.82256471
  0.59400000  -0.82256694
  0.59400000  -0.82256916
  0.59400000  -0.82257138
  0.59400000  -0.82257360
  0.59400000  -0.82257581
  0.59400000  -0.82257802
  0.59400000  -0.82258023
  0.59400000  -0.82258243
  0.59400000  -0.82258463
  0.59400000  -0.82258683
  0.59400000  -0.82258902
  0.59400000  -0.82259121
  0.59400000  -0.82259339
  0.59400000  -0.82259557
  0.59400000  -0.82259775
  0.59400000  -0.82259993
  0.59400000  -0.82260210
  0.59400000  -0.82260426
  0.59400000  -0.82260643
  0.59400000  -0.82260859
  0.59400000  -0.82261074
  0.59400000  -0.82261289
  0.59400000  -0.82261504
  0.59400000  -0.82261719
  0.59400000  -0.82261933
  0.59400000  -0.82262147
  0.59400000  -0.82262361
  0.59400000  -0.82262574
  0.59400000  -0.82262787
  0.59400000  -0.82262999
  0.59400000  -0.82263211
  0.59400000  -0.82263423
  0.59400000  -0.82263635
  0.59400000  -0.82263846
  0.59450000  -0.82257050
  0.59450000  -0.82257274
  0.59450000  -0.82257497
  0.59450000  -0.82257720
  0.59450000  -0.82257943
  0.59450000  -0.82258165
  0.59450000  -0.82258387
  0.59450000  -0.82258609
  0.59450000  -0.82258830
  0.59450000  -0.82259051
  0.59450000  -0.82259271
  0.59450000  -0.82259492
  0.59450000  -0.82259711
  0.59450000  -0.82259931
  0.59450000  -0.82260150
  0.59450000  -0.82260369
  0.59450000  -0.82260587
  0.59450000  -0.82260805
  0.59450000  -0.82261022
  0.59450000  -0.82261240
  0.59450000  -0.82261457
  0.59450000  -0.82261673
  0.59450000  -0.82261889
  0.59450000  -0.82262105
  0.59450000  -0.82262321
  0.59450000  -0.82262536
  0.59450000  -0.82262751
  0.59450000  -0.82262965
  0.59450000  -0.82263179
  0.59450000  -0.82263393
  0.59450000  -0.82263606
  0.59450000  -0.82263819
  0.59450000  -0.82264032
  0.59450000  -0.82264244
  0.59450000  -0.82264456
  0.59450000  -0.82264668
  0.59450000  -0.82264879
  0.59450000  -0.82265090
  0.59450000  -0.82265301
  0.59450000  -0.82265511
  0.59500000  -0.82258741
  0.59500000  -0.82258964
  0.59500000  -0.82259187
  0.59500000  -0.82259409
  0.59500000  -0.82259631
  0.59500000  -0.82259852
  0.59500000  -0.82260073
  0.59500000  -0.82260294
  0.59500000  -0.82260514
  0.59500000  -0.82260734
  0.59500000  -0.82260954
  0.59500000  -0.82261173
  0.59500000  -0.82261392
  0.59500000  -0.82261611
  0.59500000  -0.82261829
  0.59500000  -0.82262047
  0.59500000  -0.82262264
  0.59500000  -0.82262482
  0.59500000  -0.82262698
  0.59500000  -0.82262915
  0.59500000  -0.82263131
  0.59500000  -0.82263346
  0.59500000  -0.82263562
  0.59500000  -0.82263777
  0.59500000  -0.82263991
  0.59500000  -0.82264206
  0.59500000  -0.82264420
  0.59500000  -0.82264633
  0.59500000  -0.82264847
  0.59500000  -0.82265059
  0.59500000  -0.82265272
  0.59500000  -0.82265484
  0.59500000  -0.82265696
  0.59500000  -0.82265908
  0.59500000  -0.82266119
  0.59500000  -0.82266330
  0.59500000  -0.82266540
  0.59500000  -0.82266750
  0.59500000  -0.82266960
  0.59500000  -0.82267170
  0.59550000  -0.82260425
  0.59550000  -0.82260647
  0.59550000  -0.82260869
  0.59550000  -0.82261090
  0.59550000  -0.82261311
  0.59550000  -0.82261532
  0.59550000  -0.82261752
  0.59550000  -0.82261972
  0.59550000  -0.82262192
  0.59550000  -0.82262411
  0.59550000  -0.82262629
  0.59550000  -0.82262848
  0.59550000  -0.82263066
  0.59550000  -0.82263284
  0.59550000  -0.82263501
  0.59550000  -0.82263718
  0.59550000  -0.82263935
  0.59550000  -0.82264151
  0.59550000  -0.82264367
  0.59550000  -0.82264582
  0.59550000  -0.82264798
  0.59550000  -0.82265012
  0.59550000  -0.82265227
  0.59550000  -0.82265441
  0.59550000  -0.82265655
  0.59550000  -0.82265868
  0.59550000  -0.82266081
  0.59550000  -0.82266294
  0.59550000  -0.82266507
  0.59550000  -0.82266719
  0.59550000  -0.82266930
  0.59550000  -0.82267142
  0.59550000  -0.82267353
  0.59550000  -0.82267564
  0.59550000  -0.82267774
  0.59550000  -0.82267984
  0.59550000  -0.82268194
  0.59550000  -0.82268403
  0.59550000  -0.82268612
  0.59550000  -0.82268821
  0.59600000  -0.82262102
  0.59600000  -0.82262323
  0.59600000  -0.82262544
  0.59600000  -0.82262764
  0.59600000  -0.82262984
  0.59600000  -0.82263204
  0.59600000  -0.82263424
  0.59600000  -0.82263643
  0.59600000  -0.82263861
  0.59600000  -0.82264079
  0.59600000  -0.82264297
  0.59600000  -0.82264515
  0.59600000  -0.82264732
  0.59600000  -0.82264949
  0.59600000  -0.82265166
  0.59600000  -0.82265382
  0.59600000  -0.82265597
  0.59600000  -0.82265813
  0.59600000  -0.82266028
  0.59600000  -0.82266243
  0.59600000  -0.82266457
  0.59600000  -0.82266671
  0.59600000  -0.82266885
  0.59600000  -0.82267098
  0.59600000  -0.82267311
  0.59600000  -0.82267524
  0.59600000  -0.82267736
  0.59600000  -0.82267948
  0.59600000  -0.82268159
  0.59600000  -0.82268371
  0.59600000  -0.82268582
  0.59600000  -0.82268792
  0.59600000  -0.82269002
  0.59600000  -0.82269212
  0.59600000  -0.82269422
  0.59600000  -0.82269631
  0.59600000  -0.82269840
  0.59600000  -0.82270048
  0.59600000  -0.82270256
  0.59600000  -0.82270464
  0.59650000  -0.82263771
  0.59650000  -0.82263991
  0.59650000  -0.82264211
  0.59650000  -0.82264431
  0.59650000  -0.82264650
  0.59650000  -0.82264869
  0.59650000  -0.82265088
  0.59650000  -0.82265306
  0.59650000  -0.82265524
  0.59650000  -0.82265741
  0.59650000  -0.82265958
  0.59650000  -0.82266175
  0.59650000  -0.82266391
  0.59650000  -0.82266607
  0.59650000  -0.82266823
  0.59650000  -0.82267038
  0.59650000  -0.82267253
  0.59650000  -0.82267468
  0.59650000  -0.82267682
  0.59650000  -0.82267896
  0.59650000  -0.82268109
  0.59650000  -0.82268322
  0.59650000  -0.82268535
  0.59650000  -0.82268748
  0.59650000  -0.82268960
  0.59650000  -0.82269172
  0.59650000  -0.82269383
  0.59650000  -0.82269594
  0.59650000  -0.82269805
  0.59650000  -0.82270015
  0.59650000  -0.82270225
  0.59650000  -0.82270435
  0.59650000  -0.82270644
  0.59650000  -0.82270854
  0.59650000  -0.82271062
  0.59650000  -0.82271271
  0.59650000  -0.82271479
  0.59650000  -0.82271686
  0.59650000  -0.82271894
  0.59650000  -0.82272101
  0.59700000  -0.82265433
  0.59700000  -0.82265652
  0.59700000  -0.82265872
  0.59700000  -0.82266090
  0.59700000  -0.82266309
  0.59700000  -0.82266527
  0.59700000  -0.82266744
  0.59700000  -0.82266962
  0.59700000  -0.82267179
  0.59700000  -0.82267395
  0.59700000  -0.82267611
  0.59700000  -0.82267827
  0.59700000  -0.82268043
  0.59700000  -0.82268258
  0.59700000  -0.82268473
  0.59700000  -0.82268687
  0.59700000  -0.82268901
  0.59700000  -0.82269115
  0.59700000  -0.82269328
  0.59700000  -0.82269542
  0.59700000  -0.82269754
  0.59700000  -0.82269967
  0.59700000  -0.82270179
  0.59700000  -0.82270390
  0.59700000  -0.82270601
  0.59700000  -0.82270812
  0.59700000  -0.82271023
  0.59700000  -0.82271233
  0.59700000  -0.82271443
  0.59700000  -0.82271653
  0.59700000  -0.82271862
  0.59700000  -0.82272071
  0.59700000  -0.82272279
  0.59700000  -0.82272488
  0.59700000  -0.82272696
  0.59700000  -0.82272903
  0.59700000  -0.82273110
  0.59700000  -0.82273317
  0.59700000  -0.82273524
  0.59700000  -0.82273730
  0.59750000  -0.82267088
  0.59750000  -0.82267306
  0.59750000  -0.82267525
  0.59750000  -0.82267742
  0.59750000  -0.82267960
  0.59750000  -0.82268177
  0.59750000  -0.82268394
  0.59750000  -0.82268610
  0.59750000  -0.82268827
  0.59750000  -0.82269042
  0.59750000  -0.82269258
  0.59750000  -0.82269473
  0.59750000  -0.82269687
  0.59750000  -0.82269902
  0.59750000  -0.82270116
  0.59750000  -0.82270329
  0.59750000  -0.82270542
  0.59750000  -0.82270755
  0.59750000  -0.82270968
  0.59750000  -0.82271180
  0.59750000  -0.82271392
  0.59750000  -0.82271603
  0.59750000  -0.82271815
  0.59750000  -0.82272025
  0.59750000  -0.82272236
  0.59750000  -0.82272446
  0.59750000  -0.82272656
  0.59750000  -0.82272865
  0.59750000  -0.82273074
  0.59750000  -0.82273283
  0.59750000  -0.82273491
  0.59750000  -0.82273700
  0.59750000  -0.82273907
  0.59750000  -0.82274115
  0.59750000  -0.82274322
  0.59750000  -0.82274528
  0.59750000  -0.82274735
  0.59750000  -0.82274941
  0.59750000  -0.82275147
  0.59750000  -0.82275352
  0.59800000  -0.82268735
  0.59800000  -0.82268953
  0.59800000  -0.82269170
  0.59800000  -0.82269387
  0.59800000  -0.82269604
  0.59800000  -0.82269820
  0.59800000  -0.82270036
  0.59800000  -0.82270252
  0.59800000  -0.82270467
  0.59800000  -0.82270682
  0.59800000  -0.82270897
  0.59800000  -0.82271111
  0.59800000  -0.82271325
  0.59800000  -0.82271538
  0.59800000  -0.82271751
  0.59800000  -0.82271964
  0.59800000  -0.82272176
  0.59800000  -0.82272388
  0.59800000  -0.82272600
  0.59800000  -0.82272811
  0.59800000  -0.82273022
  0.59800000  -0.82273233
  0.59800000  -0.82273443
  0.59800000  -0.82273653
  0.59800000  -0.82273863
  0.59800000  -0.82274072
  0.59800000  -0.82274281
  0.59800000  -0.82274490
  0.59800000  -0.82274698
  0.59800000  -0.82274906
  0.59800000  -0.82275114
  0.59800000  -0.82275321
  0.59800000  -0.82275528
  0.59800000  -0.82275735
  0.59800000  -0.82275941
  0.59800000  -0.82276147
  0.59800000  -0.82276352
  0.59800000  -0.82276558
  0.59800000  -0.82276762
  0.59800000  -0.82276967
  0.59850000  -0.82270375
  0.59850000  -0.82270592
  0.59850000  -0.82270809
  0.59850000  -0.82271025
  0.59850000  -0.82271241
  0.59850000  -0.82271456
  0.59850000  -0.82271671
  0.59850000  -0.82271886
  0.59850000  -0.82272101
  0.59850000  -0.82272315
  0.59850000  -0.82272528
  0.59850000  -0.82272742
  0.59850000  -0.82272955
  0.59850000  -0.82273167
  0.59850000  -0.82273380
  0.59850000  -0.82273591
  0.59850000  -0.82273803
  0.59850000  -0.82274014
  0.59850000  -0.82274225
  0.59850000  -0.82274436
  0.59850000  -0.82274646
  0.59850000  -0.82274856
  0.59850000  -0.82275065
  0.59850000  -0.82275274
  0.59850000  -0.82275483
  0.59850000  -0.82275692
  0.59850000  -0.82275900
  0.59850000  -0.82276108
  0.59850000  -0.82276315
  0.59850000  -0.82276522
  0.59850000  -0.82276729
  0.59850000  -0.82276935
  0.59850000  -0.82277141
  0.59850000  -0.82277347
  0.59850000  -0.82277553
  0.59850000  -0.82277758
  0.59850000  -0.82277963
  0.59850000  -0.82278167
  0.59850000  -0.82278371
  0.59850000  -0.82278575
  0.59900000  -0.82272008
  0.59900000  -0.82272224
  0.59900000  -0.82272440
  0.59900000  -0.82272656
  0.59900000  -0.82272870
  0.59900000  -0.82273085
  0.59900000  -0.82273299
  0.59900000  -0.82273513
  0.59900000  -0.82273727
  0.59900000  -0.82273940
  0.59900000  -0.82274153
  0.59900000  -0.82274365
  0.59900000  -0.82274578
  0.59900000  -0.82274789
  0.59900000  -0.82275001
  0.59900000  -0.82275212
  0.59900000  -0.82275423
  0.59900000  -0.82275633
  0.59900000  -0.82275843
  0.59900000  -0.82276053
  0.59900000  -0.82276262
  0.59900000  -0.82276471
  0.59900000  -0.82276680
  0.59900000  -0.82276888
  0.59900000  -0.82277096
  0.59900000  -0.82277304
  0.59900000  -0.82277511
  0.59900000  -0.82277718
  0.59900000  -0.82277925
  0.59900000  -0.82278131
  0.59900000  -0.82278337
  0.59900000  -0.82278543
  0.59900000  -0.82278748
  0.59900000  -0.82278953
  0.59900000  -0.82279157
  0.59900000  -0.82279362
  0.59900000  -0.82279566
  0.59900000  -0.82279769
  0.59900000  -0.82279973
  0.59900000  -0.82280176
  0.59950000  -0.82273634
  0.59950000  -0.82273849
  0.59950000  -0.82274064
  0.59950000  -0.82274279
  0.59950000  -0.82274493
  0.59950000  -0.82274707
  0.59950000  -0.82274920
  0.59950000  -0.82275133
  0.59950000  -0.82275346
  0.59950000  -0.82275558
  0.59950000  -0.82275770
  0.59950000  -0.82275982
  0.59950000  -0.82276193
  0.59950000  -0.82276404
  0.59950000  -0.82276615
  0.59950000  -0.82276825
  0.59950000  -0.82277035
  0.59950000  -0.82277245
  0.59950000  -0.82277454
  0.59950000  -0.82277663
  0.59950000  -0.82277871
  0.59950000  -0.82278079
  0.59950000  -0.82278287
  0.59950000  -0.82278495
  0.59950000  -0.82278702
  0.59950000  -0.82278909
  0.59950000  -0.82279115
  0.59950000  -0.82279321
  0.59950000  -0.82279527
  0.59950000  -0.82279733
  0.59950000  -0.82279938
  0.59950000  -0.82280143
  0.59950000  -0.82280347
  0.59950000  -0.82280551
  0.59950000  -0.82280755
  0.59950000  -0.82280959
  0.59950000  -0.82281162
  0.59950000  -0.82281365
  0.59950000  -0.82281567
  0.59950000  -0.82281769
  0.60000000  -0.82275253
  0.60000000  -0.82275467
  0.60000000  -0.82275681
  0.60000000  -0.82275895
  0.60000000  -0.82276108
  0.60000000  -0.82276321
  0.60000000  -0.82276534
  0.60000000  -0.82276746
  0.60000000  -0.82276958
  0.60000000  -0.82277170
  0.60000000  -0.82277381
  0.60000000  -0.82277592
  0.60000000  -0.82277802
  0.60000000  -0.82278012
  0.60000000  -0.82278222
  0.60000000  -0.82278431
  0.60000000  -0.82278640
  0.60000000  -0.82278849
  0.60000000  -0.82279058
  0.60000000  -0.82279266
  0.60000000  -0.82279473
  0.60000000  -0.82279681
  0.60000000  -0.82279888
  0.60000000  -0.82280094
  0.60000000  -0.82280301
  0.60000000  -0.82280507
  0.60000000  -0.82280713
  0.60000000  -0.82280918
  0.60000000  -0.82281123
  0.60000000  -0.82281328
  0.60000000  -0.82281532
  0.60000000  -0.82281736
  0.60000000  -0.82281940
  0.60000000  -0.82282143
  0.60000000  -0.82282346
  0.60000000  -0.82282549
  0.60000000  -0.82282751
  0.60000000  -0.82282953
  0.60000000  -0.82283155
  0.60000000  -0.82283356
  0.60050000  -0.82276865
  0.60050000  -0.82277078
  0.60050000  -0.82277291
  0.60050000  -0.82277504
  0.60050000  -0.82277717
  0.60050000  -0.82277929
  0.60050000  -0.82278141
  0.60050000  -0.82278352
  0.60050000  -0.82278563
  0.60050000  -0.82278774
  0.60050000  -0.82278984
  0.60050000  -0.82279194
  0.60050000  -0.82279404
  0.60050000  -0.82279613
  0.60050000  -0.82279822
  0.60050000  -0.82280031
  0.60050000  -0.82280239
  0.60050000  -0.82280447
  0.60050000  -0.82280654
  0.60050000  -0.82280862
  0.60050000  -0.82281068
  0.60050000  -0.82281275
  0.60050000  -0.82281481
  0.60050000  -0.82281687
  0.60050000  -0.82281893
  0.60050000  -0.82282098
  0.60050000  -0.82282303
  0.60050000  -0.82282507
  0.60050000  -0.82282711
  0.60050000  -0.82282915
  0.60050000  -0.82283119
  0.60050000  -0.82283322
  0.60050000  -0.82283525
  0.60050000  -0.82283727
  0.60050000  -0.82283930
  0.60050000  -0.82284132
  0.60050000  -0.82284333
  0.60050000  -0.82284534
  0.60050000  -0.82284735
  0.60050000  -0.82284936
  0.60100000  -0.82278469
  0.60100000  -0.82278682
  0.60100000  -0.82278894
  0.60100000  -0.82279106
  0.60100000  -0.82279318
  0.60100000  -0.82279529
  0.60100000  -0.82279740
  0.60100000  -0.82279951
  0.60100000  -0.82280161
  0.60100000  -0.82280371
  0.60100000  -0.82280580
  0.60100000  -0.82280789
  0.60100000  -0.82280998
  0.60100000  -0.82281207
  0.60100000  -0.82281415
  0.60100000  -0.82281623
  0.60100000  -0.82281830
  0.60100000  -0.82282037
  0.60100000  -0.82282244
  0.60100000  -0.82282450
  0.60100000  -0.82282656
  0.60100000  -0.82282862
  0.60100000  -0.82283068
  0.60100000  -0.82283273
  0.60100000  -0.82283477
  0.60100000  -0.82283682
  0.60100000  -0.82283886
  0.60100000  -0.82284090
  0.60100000  -0.82284293
  0.60100000  -0.82284496
  0.60100000  -0.82284699
  0.60100000  -0.82284901
  0.60100000  -0.82285103
  0.60100000  -0.82285305
  0.60100000  -0.82285506
  0.60100000  -0.82285708
  0.60100000  -0.82285908
  0.60100000  -0.82286109
  0.60100000  -0.82286309
  0.60100000  -0.82286509
  0.60150000  -0.82280067
  0.60150000  -0.82280279
  0.60150000  -0.82280490
  0.60150000  -0.82280701
  0.60150000  -0.82280912
  0.60150000  -0.82281123
  0.60150000  -0.82281333
  0.60150000  -0.82281542
  0.60150000  -0.82281752
  0.60150000  -0.82281961
  0.60150000  -0.82282170
  0.60150000  -0.82282378
  0.60150000  -0.82282586
  0.60150000  -0.82282794
  0.60150000  -0.82283001
  0.60150000  -0.82283208
  0.60150000  -0.82283414
  0.60150000  -0.82283621
  0.60150000  -0.82283827
  0.60150000  -0.82284032
  0.60150000  -0.82284238
  0.60150000  -0.82284442
  0.60150000  -0.82284647
  0.60150000  -0.82284851
  0.60150000  -0.82285055
  0.60150000  -0.82285259
  0.60150000  -0.82285462
  0.60150000  -0.82285665
  0.60150000  -0.82285868
  0.60150000  -0.82286070
  0.60150000  -0.82286272
  0.60150000  -0.82286473
  0.60150000  -0.82286675
  0.60150000  -0.82286876
  0.60150000  -0.82287076
  0.60150000  -0.82287277
  0.60150000  -0.82287476
  0.60150000  -0.82287676
  0.60150000  -0.82287875
  0.60150000  -0.82288074
  0.60200000  -0.82281657
  0.60200000  -0.82281868
  0.60200000  -0.82282079
  0.60200000  -0.82282289
  0.60200000  -0.82282499
  0.60200000  -0.82282709
  0.60200000  -0.82282918
  0.60200000  -0.82283127
  0.60200000  -0.82283336
  0.60200000  -0.82283544
  0.60200000  -0.82283752
  0.60200000  -0.82283959
  0.60200000  -0.82284167
  0.60200000  -0.82284373
  0.60200000  -0.82284580
  0.60200000  -0.82284786
  0.60200000  -0.82284992
  0.60200000  -0.82285197
  0.60200000  -0.82285402
  0.60200000  -0.82285607
  0.60200000  -0.82285812
  0.60200000  -0.82286016
  0.60200000  -0.82286220
  0.60200000  -0.82286423
  0.60200000  -0.82286626
  0.60200000  -0.82286829
  0.60200000  -0.82287031
  0.60200000  -0.82287233
  0.60200000  -0.82287435
  0.60200000  -0.82287637
  0.60200000  -0.82287838
  0.60200000  -0.82288039
  0.60200000  -0.82288239
  0.60200000  -0.82288439
  0.60200000  -0.82288639
  0.60200000  -0.82288839
  0.60200000  -0.82289038
  0.60200000  -0.82289237
  0.60200000  -0.82289435
  0.60200000  -0.82289633
  0.60250000  -0.82283241
  0.60250000  -0.82283451
  0.60250000  -0.82283661
  0.60250000  -0.82283871
  0.60250000  -0.82284080
  0.60250000  -0.82284288
  0.60250000  -0.82284497
  0.60250000  -0.82284705
  0.60250000  -0.82284913
  0.60250000  -0.82285120
  0.60250000  -0.82285327
  0.60250000  -0.82285534
  0.60250000  -0.82285740
  0.60250000  -0.82285946
  0.60250000  -0.82286152
  0.60250000  -0.82286357
  0.60250000  -0.82286562
  0.60250000  -0.82286767
  0.60250000  -0.82286971
  0.60250000  -0.82287175
  0.60250000  -0.82287379
  0.60250000  -0.82287582
  0.60250000  -0.82287785
  0.60250000  -0.82287988
  0.60250000  -0.82288190
  0.60250000  -0.82288392
  0.60250000  -0.82288594
  0.60250000  -0.82288795
  0.60250000  -0.82288996
  0.60250000  -0.82289197
  0.60250000  -0.82289397
  0.60250000  -0.82289597
  0.60250000  -0.82289797
  0.60250000  -0.82289996
  0.60250000  -0.82290195
  0.60250000  -0.82290394
  0.60250000  -0.82290592
  0.60250000  -0.82290790
  0.60250000  -0.82290988
  0.60250000  -0.82291185
  0.60300000  -0.82284818
  0.60300000  -0.82285027
  0.60300000  -0.82285236
  0.60300000  -0.82285445
  0.60300000  -0.82285653
  0.60300000  -0.82285861
  0.60300000  -0.82286069
  0.60300000  -0.82286276
  0.60300000  -0.82286483
  0.60300000  -0.82286689
  0.60300000  -0.82286896
  0.60300000  -0.82287101
  0.60300000  -0.82287307
  0.60300000  -0.82287512
  0.60300000  -0.82287717
  0.60300000  -0.82287922
  0.60300000  -0.82288126
  0.60300000  -0.82288330
  0.60300000  -0.82288533
  0.60300000  -0.82288736
  0.60300000  -0.82288939
  0.60300000  -0.82289142
  0.60300000  -0.82289344
  0.60300000  -0.82289546
  0.60300000  -0.82289747
  0.60300000  -0.82289948
  0.60300000  -0.82290149
  0.60300000  -0.82290350
  0.60300000  -0.82290550
  0.60300000  -0.82290750
  0.60300000  -0.82290949
  0.60300000  -0.82291149
  0.60300000  -0.82291347
  0.60300000  -0.82291546
  0.60300000  -0.82291744
  0.60300000  -0.82291942
  0.60300000  -0.82292140
  0.60300000  -0.82292337
  0.60300000  -0.82292534
  0.60300000  -0.82292731
  0.60350000  -0.82286387
  0.60350000  -0.82286596
  0.60350000  -0.82286804
  0.60350000  -0.82287012
  0.60350000  -0.82287219
  0.60350000  -0.82287427
  0.60350000  -0.82287633
  0.60350000  -0.82287840
  0.60350000  -0.82288046
  0.60350000  -0.82288252
  0.60350000  -0.82288457
  0.60350000  -0.82288662
  0.60350000  -0.82288867
  0.60350000  -0.82289071
  0.60350000  -0.82289275
  0.60350000  -0.82289479
  0.60350000  -0.82289682
  0.60350000  -0.82289885
  0.60350000  -0.82290088
  0.60350000  -0.82290291
  0.60350000  -0.82290493
  0.60350000  -0.82290694
  0.60350000  -0.82290896
  0.60350000  -0.82291097
  0.60350000  -0.82291297
  0.60350000  -0.82291498
  0.60350000  -0.82291698
  0.60350000  -0.82291898
  0.60350000  -0.82292097
  0.60350000  -0.82292296
  0.60350000  -0.82292495
  0.60350000  -0.82292693
  0.60350000  -0.82292891
  0.60350000  -0.82293089
  0.60350000  -0.82293287
  0.60350000  -0.82293484
  0.60350000  -0.82293681
  0.60350000  -0.82293877
  0.60350000  -0.82294073
  0.60350000  -0.82294269
  0.60400000  -0.82287950
  0.60400000  -0.82288158
  0.60400000  -0.82288365
  0.60400000  -0.82288572
  0.60400000  -0.82288779
  0.60400000  -0.82288985
  0.60400000  -0.82289191
  0.60400000  -0.82289397
  0.60400000  -0.82289602
  0.60400000  -0.82289807
  0.60400000  -0.82290012
  0.60400000  -0.82290216
  0.60400000  -0.82290420
  0.60400000  -0.82290624
  0.60400000  -0.82290827
  0.60400000  -0.82291030
  0.60400000  -0.82291232
  0.60400000  -0.82291435
  0.60400000  -0.82291636
  0.60400000  -0.82291838
  0.60400000  -0.82292039
  0.60400000  -0.82292240
  0.60400000  -0.82292441
  0.60400000  -0.82292641
  0.60400000  -0.82292841
  0.60400000  -0.82293040
  0.60400000  -0.82293240
  0.60400000  -0.82293439
  0.60400000  -0.82293637
  0.60400000  -0.82293836
  0.60400000  -0.82294034
  0.60400000  -0.82294231
  0.60400000  -0.82294429
  0.60400000  -0.82294626
  0.60400000  -0.82294822
  0.60400000  -0.82295019
  0.60400000  -0.82295215
  0.60400000  -0.82295410
  0.60400000  -0.82295606
  0.60400000  -0.82295801
  0.60450000  -0.82289506
  0.60450000  -0.82289713
  0.60450000  -0.82289920
  0.60450000  -0.82290126
  0.60450000  -0.82290332
  0.60450000  -0.82290537
  0.60450000  -0.82290742
  0.60450000  -0.82290947
  0.60450000  -0.82291152
  0.60450000  -0.82291356
  0.60450000  -0.82291560
  0.60450000  -0.82291763
  0.60450000  -0.82291966
  0.60450000  -0.82292169
  0.60450000  -0.82292371
  0.60450000  -0.82292573
  0.60450000  -0.82292775
  0.60450000  -0.82292977
  0.60450000  -0.82293178
  0.60450000  -0.82293379
  0.60450000  -0.82293579
  0.60450000  -0.82293779
  0.60450000  -0.82293979
  0.60450000  -0.82294178
  0.60450000  -0.82294378
  0.60450000  -0.82294576
  0.60450000  -0.82294775
  0.60450000  -0.82294973
  0.60450000  -0.82295171
  0.60450000  -0.82295368
  0.60450000  -0.82295565
  0.60450000  -0.82295762
  0.60450000  -0.82295959
  0.60450000  -0.82296155
  0.60450000  -0.82296351
  0.60450000  -0.82296547
  0.60450000  -0.82296742
  0.60450000  -0.82296937
  0.60450000  -0.82297131
  0.60450000  -0.82297326
  0.60500000  -0.82291055
  0.60500000  -0.82291261
  0.60500000  -0.82291467
  0.60500000  -0.82291673
  0.60500000  -0.82291878
  0.60500000  -0.82292082
  0.60500000  -0.82292287
  0.60500000  -0.82292491
  0.60500000  -0.82292694
  0.60500000  -0.82292898
  0.60500000  -0.82293101
  0.60500000  -0.82293303
  0.60500000  -0.82293506
  0.60500000  -0.82293708
  0.60500000  -0.82293909
  0.60500000  -0.82294111
  0.60500000  -0.82294311
  0.60500000  -0.82294512
  0.60500000  -0.82294712
  0.60500000  -0.82294912
  0.60500000  -0.82295112
  0.60500000  -0.82295311
  0.60500000  -0.82295510
  0.60500000  -0.82295709
  0.60500000  -0.82295907
  0.60500000  -0.82296105
  0.60500000  -0.82296303
  0.60500000  -0.82296500
  0.60500000  -0.82296697
  0.60500000  -0.82296894
  0.60500000  -0.82297091
  0.60500000  -0.82297287
  0.60500000  -0.82297482
  0.60500000  -0.82297678
  0.60500000  -0.82297873
  0.60500000  -0.82298068
  0.60500000  -0.82298262
  0.60500000  -0.82298456
  0.60500000  -0.82298650
  0.60500000  -0.82298844
  0.60550000  -0.82292598
  0.60550000  -0.82292803
  0.60550000  -0.82293008
  0.60550000  -0.82293212
  0.60550000  -0.82293417
  0.60550000  -0.82293621
  0.60550000  -0.82293824
  0.60550000  -0.82294027
  0.60550000  -0.82294230
  0.60550000  -0.82294433
  0.60550000  -0.82294635
  0.60550000  -0.82294837
  0.60550000  -0.82295038
  0.60550000  -0.82295239
  0.60550000  -0.82295440
  0.60550000  -0.82295641
  0.60550000  -0.82295841
  0.60550000  -0.82296041
  0.60550000  -0.82296240
  0.60550000  -0.82296439
  0.60550000  -0.82296638
  0.60550000  -0.82296837
  0.60550000  -0.82297035
  0.60550000  -0.82297233
  0.60550000  -0.82297431
  0.60550000  -0.82297628
  0.60550000  -0.82297825
  0.60550000  -0.82298021
  0.60550000  -0.82298217
  0.60550000  -0.82298413
  0.60550000  -0.82298609
  0.60550000  -0.82298804
  0.60550000  -0.82298999
  0.60550000  -0.82299194
  0.60550000  -0.82299388
  0.60550000  -0.82299582
  0.60550000  -0.82299776
  0.60550000  -0.82299969
  0.60550000  -0.82300163
  0.60550000  -0.82300355
  0.60600000  -0.82294133
  0.60600000  -0.82294338
  0.60600000  -0.82294542
  0.60600000  -0.82294746
  0.60600000  -0.82294949
  0.60600000  -0.82295152
  0.60600000  -0.82295355
  0.60600000  -0.82295557
  0.60600000  -0.82295759
  0.60600000  -0.82295961
  0.60600000  -0.82296162
  0.60600000  -0.82296363
  0.60600000  -0.82296564
  0.60600000  -0.82296765
  0.60600000  -0.82296965
  0.60600000  -0.82297164
  0.60600000  -0.82297364
  0.60600000  -0.82297563
  0.60600000  -0.82297761
  0.60600000  -0.82297960
  0.60600000  -0.82298158
  0.60600000  -0.82298356
  0.60600000  -0.82298553
  0.60600000  -0.82298750
  0.60600000  -0.82298947
  0.60600000  -0.82299143
  0.60600000  -0.82299340
  0.60600000  -0.82299535
  0.60600000  -0.82299731
  0.60600000  -0.82299926
  0.60600000  -0.82300121
  0.60600000  -0.82300315
  0.60600000  -0.82300510
  0.60600000  -0.82300703
  0.60600000  -0.82300897
  0.60600000  -0.82301090
  0.60600000  -0.82301283
  0.60600000  -0.82301476
  0.60600000  -0.82301668
  0.60600000  -0.82301860
  0.60650000  -0.82295662
  0.60650000  -0.82295866
  0.60650000  -0.82296069
  0.60650000  -0.82296272
  0.60650000  -0.82296475
  0.60650000  -0.82296677
  0.60650000  -0.82296879
  0.60650000  -0.82297080
  0.60650000  -0.82297282
  0.60650000  -0.82297483
  0.60650000  -0.82297683
  0.60650000  -0.82297883
  0.60650000  -0.82298083
  0.60650000  -0.82298283
  0.60650000  -0.82298482
  0.60650000  -0.82298681
  0.60650000  -0.82298880
  0.60650000  -0.82299078
  0.60650000  -0.82299276
  0.60650000  -0.82299474
  0.60650000  -0.82299671
  0.60650000  -0.82299868
  0.60650000  -0.82300064
  0.60650000  -0.82300261
  0.60650000  -0.82300457
  0.60650000  -0.82300652
  0.60650000  -0.82300848
  0.60650000  -0.82301043
  0.60650000  -0.82301237
  0.60650000  -0.82301432
  0.60650000  -0.82301626
  0.60650000  -0.82301820
  0.60650000  -0.82302013
  0.60650000  -0.82302206
  0.60650000  -0.82302399
  0.60650000  -0.82302591
  0.60650000  -0.82302784
  0.60650000  -0.82302976
  0.60650000  -0.82303167
  0.60650000  -0.82303358
  0.60700000  -0.82297184
  0.60700000  -0.82297387
  0.60700000  -0.82297590
  0.60700000  -0.82297792
  0.60700000  -0.82297994
  0.60700000  -0.82298195
  0.60700000  -0.82298396
  0.60700000  -0.82298597
  0.60700000  -0.82298797
  0.60700000  -0.82298997
  0.60700000  -0.82299197
  0.60700000  -0.82299397
  0.60700000  -0.82299596
  0.60700000  -0.82299795
  0.60700000  -0.82299993
  0.60700000  -0.82300191
  0.60700000  -0.82300389
  0.60700000  -0.82300587
  0.60700000  -0.82300784
  0.60700000  -0.82300981
  0.60700000  -0.82301177
  0.60700000  -0.82301373
  0.60700000  -0.82301569
  0.60700000  -0.82301765
  0.60700000  -0.82301960
  0.60700000  -0.82302155
  0.60700000  -0.82302349
  0.60700000  -0.82302543
  0.60700000  -0.82302737
  0.60700000  -0.82302931
  0.60700000  -0.82303124
  0.60700000  -0.82303317
  0.60700000  -0.82303510
  0.60700000  -0.82303702
  0.60700000  -0.82303894
  0.60700000  -0.82304086
  0.60700000  -0.82304278
  0.60700000  -0.82304469
  0.60700000  -0.82304659
  0.60700000  -0.82304850
  0.60750000  -0.82298700
  0.60750000  -0.82298902
  0.60750000  -0.82299103
  0.60750000  -0.82299305
  0.60750000  -0.82299506
  0.60750000  -0.82299706
  0.60750000  -0.82299907
  0.60750000  -0.82300107
  0.60750000  -0.82300306
  0.60750000  -0.82300506
  0.60750000  -0.82300705
  0.60750000  -0.82300903
  0.60750000  -0.82301102
  0.60750000  -0.82301300
  0.60750000  -0.82301497
  0.60750000  -0.82301695
  0.60750000  -0.82301892
  0.60750000  -0.82302088
  0.60750000  -0.82302285
  0.60750000  -0.82302481
  0.60750000  -0.82302677
  0.60750000  -0.82302872
  0.60750000  -0.82303067
  0.60750000  -0.82303262
  0.60750000  -0.82303456
  0.60750000  -0.82303650
  0.60750000  -0.82303844
  0.60750000  -0.82304038
  0.60750000  -0.82304231
  0.60750000  -0.82304424
  0.60750000  -0.82304616
  0.60750000  -0.82304808
  0.60750000  -0.82305000
  0.60750000  -0.82305192
  0.60750000  -0.82305383
  0.60750000  -0.82305574
  0.60750000  -0.82305765
  0.60750000  -0.82305955
  0.60750000  -0.82306145
  0.60750000  -0.82306335
  0.60800000  -0.82300208
  0.60800000  -0.82300410
  0.60800000  -0.82300611
  0.60800000  -0.82300811
  0.60800000  -0.82301011
  0.60800000  -0.82301211
  0.60800000  -0.82301411
  0.60800000  -0.82301610
  0.60800000  -0.82301809
  0.60800000  -0.82302007
  0.60800000  -0.82302206
  0.60800000  -0.82302403
  0.60800000  -0.82302601
  0.60800000  -0.82302798
  0.60800000  -0.82302995
  0.60800000  -0.82303192
  0.60800000  -0.82303388
  0.60800000  -0.82303584
  0.60800000  -0.82303779
  0.60800000  -0.82303975
  0.60800000  -0.82304170
  0.60800000  -0.82304364
  0.60800000  -0.82304558
  0.60800000  -0.82304752
  0.60800000  -0.82304946
  0.60800000  -0.82305139
  0.60800000  -0.82305332
  0.60800000  -0.82305525
  0.60800000  -0.82305718
  0.60800000  -0.82305910
  0.60800000  -0.82306101
  0.60800000  -0.82306293
  0.60800000  -0.82306484
  0.60800000  -0.82306675
  0.60800000  -0.82306865
  0.60800000  -0.82307056
  0.60800000  -0.82307245
  0.60800000  -0.82307435
  0.60800000  -0.82307624
  0.60800000  -0.82307813
  0.60850000  -0.82301711
  0.60850000  -0.82301911
  0.60850000  -0.82302111
  0.60850000  -0.82302311
  0.60850000  -0.82302510
  0.60850000  -0.82302709
  0.60850000  -0.82302908
  0.60850000  -0.82303106
  0.60850000  -0.82303305
  0.60850000  -0.82303502
  0.60850000  -0.82303700
  0.60850000  -0.82303897
  0.60850000  -0.82304094
  0.60850000  -0.82304290
  0.60850000  -0.82304486
  0.60850000  -0.82304682
  0.60850000  -0.82304877
  0.60850000  -0.82305072
  0.60850000  -0.82305267
  0.60850000  -0.82305462
  0.60850000  -0.82305656
  0.60850000  -0.82305850
  0.60850000  -0.82306043
  0.60850000  -0.82306237
  0.60850000  -0.82306429
  0.60850000  -0.82306622
  0.60850000  -0.82306814
  0.60850000  -0.82307006
  0.60850000  -0.82307198
  0.60850000  -0.82307389
  0.60850000  -0.82307580
  0.60850000  -0.82307771
  0.60850000  -0.82307961
  0.60850000  -0.82308151
  0.60850000  -0.82308341
  0.60850000  -0.82308530
  0.60850000  -0.82308720
  0.60850000  -0.82308908
  0.60850000  -0.82309097
  0.60850000  -0.82309285
  0.60900000  -0.82303206
  0.60900000  -0.82303406
  0.60900000  -0.82303605
  0.60900000  -0.82303804
  0.60900000  -0.82304003
  0.60900000  -0.82304201
  0.60900000  -0.82304399
  0.60900000  -0.82304596
  0.60900000  -0.82304794
  0.60900000  -0.82304991
  0.60900000  -0.82305187
  0.60900000  -0.82305384
  0.60900000  -0.82305580
  0.60900000  -0.82305775
  0.60900000  -0.82305971
  0.60900000  -0.82306166
  0.60900000  -0.82306360
  0.60900000  -0.82306555
  0.60900000  -0.82306749
  0.60900000  -0.82306942
  0.60900000  -0.82307136
  0.60900000  -0.82307329
  0.60900000  -0.82307522
  0.60900000  -0.82307714
  0.60900000  -0.82307906
  0.60900000  -0.82308098
  0.60900000  -0.82308289
  0.60900000  -0.82308481
  0.60900000  -0.82308672
  0.60900000  -0.82308862
  0.60900000  -0.82309052
  0.60900000  -0.82309242
  0.60900000  -0.82309432
  0.60900000  -0.82309621
  0.60900000  -0.82309810
  0.60900000  -0.82309999
  0.60900000  -0.82310187
  0.60900000  -0.82310375
  0.60900000  -0.82310563
  0.60900000  -0.82310751
  0.60950000  -0.82304695
  0.60950000  -0.82304894
  0.60950000  -0.82305092
  0.60950000  -0.82305291
  0.60950000  -0.82305488
  0.60950000  -0.82305686
  0.60950000  -0.82305883
  0.60950000  -0.82306080
  0.60950000  -0.82306276
  0.60950000  -0.82306473
  0.60950000  -0.82306668
  0.60950000  -0.82306864
  0.60950000  -0.82307059
  0.60950000  -0.82307254
  0.60950000  -0.82307449
  0.60950000  -0.82307643
  0.60950000  -0.82307837
  0.60950000  -0.82308030
  0.60950000  -0.82308224
  0.60950000  -0.82308417
  0.60950000  -0.82308609
  0.60950000  -0.82308801
  0.60950000  -0.82308993
  0.60950000  -0.82309185
  0.60950000  -0.82309376
  0.60950000  -0.82309567
  0.60950000  -0.82309758
  0.60950000  -0.82309949
  0.60950000  -0.82310139
  0.60950000  -0.82310329
  0.60950000  -0.82310518
  0.60950000  -0.82310707
  0.60950000  -0.82310896
  0.60950000  -0.82311085
  0.60950000  -0.82311273
  0.60950000  -0.82311461
  0.60950000  -0.82311648
  0.60950000  -0.82311836
  0.60950000  -0.82312023
  0.60950000  -0.82312209
  0.61000000  -0.82306177
  0.61000000  -0.82306375
  0.61000000  -0.82306573
  0.61000000  -0.82306771
  0.61000000  -0.82306968
  0.61000000  -0.82307164
  0.61000000  -0.82307361
  0.61000000  -0.82307557
  0.61000000  -0.82307753
  0.61000000  -0.82307948
  0.61000000  -0.82308143
  0.61000000  -0.82308338
  0.61000000  -0.82308532
  0.61000000  -0.82308726
  0.61000000  -0.82308920
  0.61000000  -0.82309113
  0.61000000  -0.82309307
  0.61000000  -0.82309499
  0.61000000  -0.82309692
  0.61000000  -0.82309884
  0.61000000  -0.82310076
  0.61000000  -0.82310267
  0.61000000  -0.82310459
  0.61000000  -0.82310650
  0.61000000  -0.82310840
  0.61000000  -0.82311030
  0.61000000  -0.82311220
  0.61000000  -0.82311410
  0.61000000  -0.82311599
  0.61000000  -0.82311788
  0.61000000  -0.82311977
  0.61000000  -0.82312166
  0.61000000  -0.82312354
  0.61000000  -0.82312542
  0.61000000  -0.82312729
  0.61000000  -0.82312916
  0.61000000  -0.82313103
  0.61000000  -0.82313290
  0.61000000  -0.82313476
  0.61000000  -0.82313662
  0.61050000  -0.82307653
  0.61050000  -0.82307851
  0.61050000  -0.82308048
  0.61050000  -0.82308244
  0.61050000  -0.82308440
  0.61050000  -0.82308636
  0.61050000  -0.82308832
  0.61050000  -0.82309027
  0.61050000  -0.82309222
  0.61050000  -0.82309417
  0.61050000  -0.82309611
  0.61050000  -0.82309805
  0.61050000  -0.82309999
  0.61050000  -0.82310192
  0.61050000  -0.82310385
  0.61050000  -0.82310578
  0.61050000  -0.82310770
  0.61050000  -0.82310962
  0.61050000  -0.82311154
  0.61050000  -0.82311345
  0.61050000  -0.82311536
  0.61050000  -0.82311727
  0.61050000  -0.82311918
  0.61050000  -0.82312108
  0.61050000  -0.82312298
  0.61050000  -0.82312487
  0.61050000  -0.82312676
  0.61050000  -0.82312865
  0.61050000  -0.82313054
  0.61050000  -0.82313242
  0.61050000  -0.82313430
  0.61050000  -0.82313618
  0.61050000  -0.82313805
  0.61050000  -0.82313992
  0.61050000  -0.82314179
  0.61050000  -0.82314365
  0.61050000  -0.82314551
  0.61050000  -0.82314737
  0.61050000  -0.82314923
  0.61050000  -0.82315108
  0.61100000  -0.82309123
  0.61100000  -0.82309319
  0.61100000  -0.82309515
  0.61100000  -0.82309711
  0.61100000  -0.82309907
  0.61100000  -0.82310102
  0.61100000  -0.82310297
  0.61100000  -0.82310491
  0.61100000  -0.82310685
  0.61100000  -0.82310879
  0.61100000  -0.82311073
  0.61100000  -0.82311266
  0.61100000  -0.82311459
  0.61100000  -0.82311651
  0.61100000  -0.82311844
  0.61100000  -0.82312035
  0.61100000  -0.82312227
  0.61100000  -0.82312418
  0.61100000  -0.82312609
  0.61100000  -0.82312800
  0.61100000  -0.82312990
  0.61100000  -0.82313180
  0.61100000  -0.82313370
  0.61100000  -0.82313559
  0.61100000  -0.82313748
  0.61100000  -0.82313937
  0.61100000  -0.82314126
  0.61100000  -0.82314314
  0.61100000  -0.82314502
  0.61100000  -0.82314689
  0.61100000  -0.82314876
  0.61100000  -0.82315063
  0.61100000  -0.82315250
  0.61100000  -0.82315436
  0.61100000  -0.82315622
  0.61100000  -0.82315808
  0.61100000  -0.82315993
  0.61100000  -0.82316178
  0.61100000  -0.82316363
  0.61100000  -0.82316548
  0.61150000  -0.82310586
  0.61150000  -0.82310781
  0.61150000  -0.82310977
  0.61150000  -0.82311172
  0.61150000  -0.82311366
  0.61150000  -0.82311561
  0.61150000  -0.82311755
  0.61150000  -0.82311949
  0.61150000  -0.82312142
  0.61150000  -0.82312335
  0.61150000  -0.82312528
  0.61150000  -0.82312720
  0.61150000  -0.82312912
  0.61150000  -0.82313104
  0.61150000  -0.82313296
  0.61150000  -0.82313487
  0.61150000  -0.82313678
  0.61150000  -0.82313868
  0.61150000  -0.82314058
  0.61150000  -0.82314248
  0.61150000  -0.82314438
  0.61150000  -0.82314627
  0.61150000  -0.82314816
  0.61150000  -0.82315005
  0.61150000  -0.82315193
  0.61150000  -0.82315381
  0.61150000  -0.82315569
  0.61150000  -0.82315756
  0.61150000  -0.82315943
  0.61150000  -0.82316130
  0.61150000  -0.82316316
  0.61150000  -0.82316503
  0.61150000  -0.82316688
  0.61150000  -0.82316874
  0.61150000  -0.82317059
  0.61150000  -0.82317244
  0.61150000  -0.82317429
  0.61150000  -0.82317613
  0.61150000  -0.82317797
  0.61150000  -0.82317981
  0.61200000  -0.82312042
  0.61200000  -0.82312237
  0.61200000  -0.82312432
  0.61200000  -0.82312626
  0.61200000  -0.82312820
  0.61200000  -0.82313013
  0.61200000  -0.82313207
  0.61200000  -0.82313400
  0.61200000  -0.82313592
  0.61200000  -0.82313785
  0.61200000  -0.82313977
  0.61200000  -0.82314168
  0.61200000  -0.82314360
  0.61200000  -0.82314551
  0.61200000  -0.82314741
  0.61200000  -0.82314932
  0.61200000  -0.82315122
  0.61200000  -0.82315311
  0.61200000  -0.82315501
  0.61200000  -0.82315690
  0.61200000  -0.82315879
  0.61200000  -0.82316067
  0.61200000  -0.82316256
  0.61200000  -0.82316443
  0.61200000  -0.82316631
  0.61200000  -0.82316818
  0.61200000  -0.82317005
  0.61200000  -0.82317192
  0.61200000  -0.82317378
  0.61200000  -0.82317564
  0.61200000  -0.82317750
  0.61200000  -0.82317935
  0.61200000  -0.82318121
  0.61200000  -0.82318305
  0.61200000  -0.82318490
  0.61200000  -0.82318674
  0.61200000  -0.82318858
  0.61200000  -0.82319042
  0.61200000  -0.82319225
  0.61200000  -0.82319408
  0.61250000  -0.82313492
  0.61250000  -0.82313686
  0.61250000  -0.82313880
  0.61250000  -0.82314074
  0.61250000  -0.82314267
  0.61250000  -0.82314460
  0.61250000  -0.82314652
  0.61250000  -0.82314844
  0.61250000  -0.82315036
  0.61250000  -0.82315228
  0.61250000  -0.82315419
  0.61250000  -0.82315610
  0.61250000  -0.82315800
  0.61250000  -0.82315991
  0.61250000  -0.82316181
  0.61250000  -0.82316370
  0.61250000  -0.82316560
  0.61250000  -0.82316749
  0.61250000  -0.82316937
  0.61250000  -0.82317126
  0.61250000  -0.82317314
  0.61250000  -0.82317501
  0.61250000  -0.82317689
  0.61250000  -0.82317876
  0.61250000  -0.82318063
  0.61250000  -0.82318249
  0.61250000  -0.82318435
  0.61250000  -0.82318621
  0.61250000  -0.82318807
  0.61250000  -0.82318992
  0.61250000  -0.82319177
  0.61250000  -0.82319362
  0.61250000  -0.82319546
  0.61250000  -0.82319730
  0.61250000  -0.82319914
  0.61250000  -0.82320098
  0.61250000  -0.82320281
  0.61250000  -0.82320464
  0.61250000  -0.82320646
  0.61250000  -0.82320829
  0.61300000  -0.82314936
  0.61300000  -0.82315129
  0.61300000  -0.82315322
  0.61300000  -0.82315515
  0.61300000  -0.82315707
  0.61300000  -0.82315899
  0.61300000  -0.82316091
  0.61300000  -0.82316283
  0.61300000  -0.82316474
  0.61300000  -0.82316664
  0.61300000  -0.82316855
  0.61300000  -0.82317045
  0.61300000  -0.82317235
  0.61300000  -0.82317424
  0.61300000  -0.82317614
  0.61300000  -0.82317802
  0.61300000  -0.82317991
  0.61300000  -0.82318179
  0.61300000  -0.82318367
  0.61300000  -0.82318555
  0.61300000  -0.82318742
  0.61300000  -0.82318929
  0.61300000  -0.82319116
  0.61300000  -0.82319302
  0.61300000  -0.82319488
  0.61300000  -0.82319674
  0.61300000  -0.82319859
  0.61300000  -0.82320045
  0.61300000  -0.82320229
  0.61300000  -0.82320414
  0.61300000  -0.82320598
  0.61300000  -0.82320782
  0.61300000  -0.82320966
  0.61300000  -0.82321149
  0.61300000  -0.82321332
  0.61300000  -0.82321515
  0.61300000  -0.82321697
  0.61300000  -0.82321880
  0.61300000  -0.82322061
  0.61300000  -0.82322243
  0.61350000  -0.82316373
  0.61350000  -0.82316566
  0.61350000  -0.82316758
  0.61350000  -0.82316950
  0.61350000  -0.82317142
  0.61350000  -0.82317333
  0.61350000  -0.82317524
  0.61350000  -0.82317715
  0.61350000  -0.82317905
  0.61350000  -0.82318095
  0.61350000  -0.82318285
  0.61350000  -0.82318474
  0.61350000  -0.82318663
  0.61350000  -0.82318852
  0.61350000  -0.82319040
  0.61350000  -0.82319228
  0.61350000  -0.82319416
  0.61350000  -0.82319604
  0.61350000  -0.82319791
  0.61350000  -0.82319978
  0.61350000  -0.82320164
  0.61350000  -0.82320350
  0.61350000  -0.82320536
  0.61350000  -0.82320722
  0.61350000  -0.82320907
  0.61350000  -0.82321092
  0.61350000  -0.82321277
  0.61350000  -0.82321461
  0.61350000  -0.82321646
  0.61350000  -0.82321829
  0.61350000  -0.82322013
  0.61350000  -0.82322196
  0.61350000  -0.82322379
  0.61350000  -0.82322562
  0.61350000  -0.82322744
  0.61350000  -0.82322926
  0.61350000  -0.82323108
  0.61350000  -0.82323289
  0.61350000  -0.82323470
  0.61350000  -0.82323651
  0.61400000  -0.82317804
  0.61400000  -0.82317996
  0.61400000  -0.82318188
  0.61400000  -0.82318379
  0.61400000  -0.82318570
  0.61400000  -0.82318760
  0.61400000  -0.82318950
  0.61400000  -0.82319140
  0.61400000  -0.82319330
  0.61400000  -0.82319519
  0.61400000  -0.82319708
  0.61400000  -0.82319897
  0.61400000  -0.82320085
  0.61400000  -0.82320273
  0.61400000  -0.82320461
  0.61400000  -0.82320648
  0.61400000  -0.82320835
  0.61400000  -0.82321022
  0.61400000  -0.82321208
  0.61400000  -0.82321394
  0.61400000  -0.82321580
  0.61400000  -0.82321766
  0.61400000  -0.82321951
  0.61400000  -0.82322136
  0.61400000  -0.82322320
  0.61400000  -0.82322505
  0.61400000  -0.82322688
  0.61400000  -0.82322872
  0.61400000  -0.82323056
  0.61400000  -0.82323239
  0.61400000  -0.82323421
  0.61400000  -0.82323604
  0.61400000  -0.82323786
  0.61400000  -0.82323968
  0.61400000  -0.82324149
  0.61400000  -0.82324331
  0.61400000  -0.82324512
  0.61400000  -0.82324692
  0.61400000  -0.82324873
  0.61400000  -0.82325053
  0.61450000  -0.82319229
  0.61450000  -0.82319420
  0.61450000  -0.82319611
  0.61450000  -0.82319801
  0.61450000  -0.82319991
  0.61450000  -0.82320181
  0.61450000  -0.82320370
  0.61450000  -0.82320560
  0.61450000  -0.82320748
  0.61450000  -0.82320937
  0.61450000  -0.82321125
  0.61450000  -0.82321313
  0.61450000  -0.82321500
  0.61450000  -0.82321688
  0.61450000  -0.82321875
  0.61450000  -0.82322061
  0.61450000  -0.82322248
  0.61450000  -0.82322434
  0.61450000  -0.82322619
  0.61450000  -0.82322805
  0.61450000  -0.82322990
  0.61450000  -0.82323174
  0.61450000  -0.82323359
  0.61450000  -0.82323543
  0.61450000  -0.82323727
  0.61450000  -0.82323910
  0.61450000  -0.82324094
  0.61450000  -0.82324277
  0.61450000  -0.82324459
  0.61450000  -0.82324642
  0.61450000  -0.82324824
  0.61450000  -0.82325005
  0.61450000  -0.82325187
  0.61450000  -0.82325368
  0.61450000  -0.82325549
  0.61450000  -0.82325729
  0.61450000  -0.82325910
  0.61450000  -0.82326090
  0.61450000  -0.82326269
  0.61450000  -0.82326449
  0.61500000  -0.82320647
  0.61500000  -0.82320838
  0.61500000  -0.82321028
  0.61500000  -0.82321217
  0.61500000  -0.82321407
  0.61500000  -0.82321596
  0.61500000  -0.82321784
  0.61500000  -0.82321973
  0.61500000  -0.82322161
  0.61500000  -0.82322348
  0.61500000  -0.82322536
  0.61500000  -0.82322723
  0.61500000  -0.82322910
  0.61500000  -0.82323096
  0.61500000  -0.82323282
  0.61500000  -0.82323468
  0.61500000  -0.82323654
  0.61500000  -0.82323839
  0.61500000  -0.82324024
  0.61500000  -0.82324209
  0.61500000  -0.82324393
  0.61500000  -0.82324577
  0.61500000  -0.82324761
  0.61500000  -0.82324944
  0.61500000  -0.82325127
  0.61500000  -0.82325310
  0.61500000  -0.82325493
  0.61500000  -0.82325675
  0.61500000  -0.82325857
  0.61500000  -0.82326038
  0.61500000  -0.82326220
  0.61500000  -0.82326401
  0.61500000  -0.82326581
  0.61500000  -0.82326762
  0.61500000  -0.82326942
  0.61500000  -0.82327122
  0.61500000  -0.82327301
  0.61500000  -0.82327480
  0.61500000  -0.82327659
  0.61500000  -0.82327838
  0.61550000  -0.82322060
  0.61550000  -0.82322249
  0.61550000  -0.82322438
  0.61550000  -0.82322627
  0.61550000  -0.82322816
  0.61550000  -0.82323004
  0.61550000  -0.82323192
  0.61550000  -0.82323380
  0.61550000  -0.82323567
  0.61550000  -0.82323754
  0.61550000  -0.82323940
  0.61550000  -0.82324127
  0.61550000  -0.82324313
  0.61550000  -0.82324499
  0.61550000  -0.82324684
  0.61550000  -0.82324869
  0.61550000  -0.82325054
  0.61550000  -0.82325239
  0.61550000  -0.82325423
  0.61550000  -0.82325607
  0.61550000  -0.82325790
  0.61550000  -0.82325973
  0.61550000  -0.82326156
  0.61550000  -0.82326339
  0.61550000  -0.82326521
  0.61550000  -0.82326704
  0.61550000  -0.82326885
  0.61550000  -0.82327067
  0.61550000  -0.82327248
  0.61550000  -0.82327429
  0.61550000  -0.82327609
  0.61550000  -0.82327790
  0.61550000  -0.82327970
  0.61550000  -0.82328149
  0.61550000  -0.82328329
  0.61550000  -0.82328508
  0.61550000  -0.82328687
  0.61550000  -0.82328865
  0.61550000  -0.82329043
  0.61550000  -0.82329221
  0.61600000  -0.82323465
  0.61600000  -0.82323654
  0.61600000  -0.82323843
  0.61600000  -0.82324031
  0.61600000  -0.82324219
  0.61600000  -0.82324406
  0.61600000  -0.82324593
  0.61600000  -0.82324780
  0.61600000  -0.82324967
  0.61600000  -0.82325153
  0.61600000  -0.82325339
  0.61600000  -0.82325525
  0.61600000  -0.82325710
  0.61600000  -0.82325895
  0.61600000  -0.82326080
  0.61600000  -0.82326264
  0.61600000  -0.82326448
  0.61600000  -0.82326632
  0.61600000  -0.82326815
  0.61600000  -0.82326998
  0.61600000  -0.82327181
  0.61600000  -0.82327364
  0.61600000  -0.82327546
  0.61600000  -0.82327728
  0.61600000  -0.82327910
  0.61600000  -0.82328091
  0.61600000  -0.82328272
  0.61600000  -0.82328453
  0.61600000  -0.82328633
  0.61600000  -0.82328813
  0.61600000  -0.82328993
  0.61600000  -0.82329173
  0.61600000  -0.82329352
  0.61600000  -0.82329531
  0.61600000  -0.82329710
  0.61600000  -0.82329888
  0.61600000  -0.82330066
  0.61600000  -0.82330244
  0.61600000  -0.82330421
  0.61600000  -0.82330599
  0.61650000  -0.82324865
  0.61650000  -0.82325053
  0.61650000  -0.82325241
  0.61650000  -0.82325428
  0.61650000  -0.82325615
  0.61650000  -0.82325802
  0.61650000  -0.82325989
  0.61650000  -0.82326175
  0.61650000  -0.82326360
  0.61650000  -0.82326546
  0.61650000  -0.82326731
  0.61650000  -0.82326916
  0.61650000  -0.82327101
  0.61650000  -0.82327285
  0.61650000  -0.82327469
  0.61650000  -0.82327652
  0.61650000  -0.82327836
  0.61650000  -0.82328019
  0.61650000  -0.82328201
  0.61650000  -0.82328384
  0.61650000  -0.82328566
  0.61650000  -0.82328748
  0.61650000  -0.82328929
  0.61650000  -0.82329111
  0.61650000  -0.82329291
  0.61650000  -0.82329472
  0.61650000  -0.82329652
  0.61650000  -0.82329832
  0.61650000  -0.82330012
  0.61650000  -0.82330192
  0.61650000  -0.82330371
  0.61650000  -0.82330550
  0.61650000  -0.82330728
  0.61650000  -0.82330906
  0.61650000  -0.82331084
  0.61650000  -0.82331262
  0.61650000  -0.82331439
  0.61650000  -0.82331616
  0.61650000  -0.82331793
  0.61650000  -0.82331970
  0.61700000  -0.82326259
  0.61700000  -0.82326446
  0.61700000  -0.82326633
  0.61700000  -0.82326820
  0.61700000  -0.82327006
  0.61700000  -0.82327192
  0.61700000  -0.82327378
  0.61700000  -0.82327563
  0.61700000  -0.82327748
  0.61700000  -0.82327933
  0.61700000  -0.82328117
  0.61700000  -0.82328301
  0.61700000  -0.82328485
  0.61700000  -0.82328669
  0.61700000  -0.82328852
  0.61700000  -0.82329035
  0.61700000  -0.82329217
  0.61700000  -0.82329400
  0.61700000  -0.82329582
  0.61700000  -0.82329763
  0.61700000  -0.82329945
  0.61700000  -0.82330126
  0.61700000  -0.82330307
  0.61700000  -0.82330487
  0.61700000  -0.82330667
  0.61700000  -0.82330847
  0.61700000  -0.82331027
  0.61700000  -0.82331206
  0.61700000  -0.82331385
  0.61700000  -0.82331564
  0.61700000  -0.82331742
  0.61700000  -0.82331920
  0.61700000  -0.82332098
  0.61700000  -0.82332276
  0.61700000  -0.82332453
  0.61700000  -0.82332630
  0.61700000  -0.82332807
  0.61700000  -0.82332983
  0.61700000  -0.82333159
  0.61700000  -0.82333335
  0.61750000  -0.82327646
  0.61750000  -0.82327833
  0.61750000  -0.82328019
  0.61750000  -0.82328205
  0.61750000  -0.82328390
  0.61750000  -0.82328576
  0.61750000  -0.82328761
  0.61750000  -0.82328945
  0.61750000  -0.82329130
  0.61750000  -0.82329314
  0.61750000  -0.82329497
  0.61750000  -0.82329681
  0.61750000  -0.82329864
  0.61750000  -0.82330046
  0.61750000  -0.82330229
  0.61750000  -0.82330411
  0.61750000  -0.82330593
  0.61750000  -0.82330775
  0.61750000  -0.82330956
  0.61750000  -0.82331137
  0.61750000  -0.82331317
  0.61750000  -0.82331498
  0.61750000  -0.82331678
  0.61750000  -0.82331858
  0.61750000  -0.82332037
  0.61750000  -0.82332216
  0.61750000  -0.82332395
  0.61750000  -0.82332574
  0.61750000  -0.82332752
  0.61750000  -0.82332930
  0.61750000  -0.82333108
  0.61750000  -0.82333285
  0.61750000  -0.82333462
  0.61750000  -0.82333639
  0.61750000  -0.82333815
  0.61750000  -0.82333992
  0.61750000  -0.82334168
  0.61750000  -0.82334343
  0.61750000  -0.82334519
  0.61750000  -0.82334694
  0.61800000  -0.82329028
  0.61800000  -0.82329213
  0.61800000  -0.82329399
  0.61800000  -0.82329584
  0.61800000  -0.82329769
  0.61800000  -0.82329953
  0.61800000  -0.82330137
  0.61800000  -0.82330321
  0.61800000  -0.82330505
  0.61800000  -0.82330688
  0.61800000  -0.82330871
  0.61800000  -0.82331054
  0.61800000  -0.82331236
  0.61800000  -0.82331418
  0.61800000  -0.82331600
  0.61800000  -0.82331781
  0.61800000  -0.82331962
  0.61800000  -0.82332143
  0.61800000  -0.82332324
  0.61800000  -0.82332504
  0.61800000  -0.82332684
  0.61800000  -0.82332864
  0.61800000  -0.82333043
  0.61800000  -0.82333222
  0.61800000  -0.82333401
  0.61800000  -0.82333579
  0.61800000  -0.82333757
  0.61800000  -0.82333935
  0.61800000  -0.82334113
  0.61800000  -0.82334290
  0.61800000  -0.82334467
  0.61800000  -0.82334644
  0.61800000  -0.82334820
  0.61800000  -0.82334996
  0.61800000  -0.82335172
  0.61800000  -0.82335348
  0.61800000  -0.82335523
  0.61800000  -0.82335698
  0.61800000  -0.82335872
  0.61800000  -0.82336047
  0.61850000  -0.82330403
  0.61850000  -0.82330588
  0.61850000  -0.82330772
  0.61850000  -0.82330957
  0.61850000  -0.82331141
  0.61850000  -0.82331325
  0.61850000  -0.82331508
  0.61850000  -0.82331691
  0.61850000  -0.82331874
  0.61850000  -0.82332057
  0.61850000  -0.82332239
  0.61850000  -0.82332421
  0.61850000  -0.82332602
  0.61850000  -0.82332784
  0.61850000  -0.82332965
  0.61850000  -0.82333145
  0.61850000  -0.82333326
  0.61850000  -0.82333506
  0.61850000  -0.82333686
  0.61850000  -0.82333865
  0.61850000  -0.82334044
  0.61850000  -0.82334223
  0.61850000  -0.82334402
  0.61850000  -0.82334580
  0.61850000  -0.82334758
  0.61850000  -0.82334936
  0.61850000  -0.82335113
  0.61850000  -0.82335291
  0.61850000  -0.82335467
  0.61850000  -0.82335644
  0.61850000  -0.82335820
  0.61850000  -0.82335996
  0.61850000  -0.82336172
  0.61850000  -0.82336347
  0.61850000  -0.82336522
  0.61850000  -0.82336697
  0.61850000  -0.82336872
  0.61850000  -0.82337046
  0.61850000  -0.82337220
  0.61850000  -0.82337394
  0.61900000  -0.82331772
  0.61900000  -0.82331956
  0.61900000  -0.82332140
  0.61900000  -0.82332324
  0.61900000  -0.82332507
  0.61900000  -0.82332690
  0.61900000  -0.82332873
  0.61900000  -0.82333055
  0.61900000  -0.82333237
  0.61900000  -0.82333419
  0.61900000  -0.82333601
  0.61900000  -0.82333782
  0.61900000  -0.82333963
  0.61900000  -0.82334143
  0.61900000  -0.82334324
  0.61900000  -0.82334504
  0.61900000  -0.82334683
  0.61900000  -0.82334863
  0.61900000  -0.82335042
  0.61900000  -0.82335220
  0.61900000  -0.82335399
  0.61900000  -0.82335577
  0.61900000  -0.82335755
  0.61900000  -0.82335933
  0.61900000  -0.82336110
  0.61900000  -0.82336287
  0.61900000  -0.82336464
  0.61900000  -0.82336640
  0.61900000  -0.82336816
  0.61900000  -0.82336992
  0.61900000  -0.82337168
  0.61900000  -0.82337343
  0.61900000  -0.82337518
  0.61900000  -0.82337693
  0.61900000  -0.82337867
  0.61900000  -0.82338041
  0.61900000  -0.82338215
  0.61900000  -0.82338388
  0.61900000  -0.82338562
  0.61900000  -0.82338735
  0.61950000  -0.82333135
  0.61950000  -0.82333319
  0.61950000  -0.82333502
  0.61950000  -0.82333685
  0.61950000  -0.82333867
  0.61950000  -0.82334050
  0.61950000  -0.82334232
  0.61950000  -0.82334413
  0.61950000  -0.82334595
  0.61950000  -0.82334776
  0.61950000  -0.82334956
  0.61950000  -0.82335137
  0.61950000  -0.82335317
  0.61950000  -0.82335497
  0.61950000  -0.82335676
  0.61950000  -0.82335856
  0.61950000  -0.82336035
  0.61950000  -0.82336213
  0.61950000  -0.82336392
  0.61950000  -0.82336570
  0.61950000  -0.82336747
  0.61950000  -0.82336925
  0.61950000  -0.82337102
  0.61950000  -0.82337279
  0.61950000  -0.82337456
  0.61950000  -0.82337632
  0.61950000  -0.82337808
  0.61950000  -0.82337984
  0.61950000  -0.82338159
  0.61950000  -0.82338334
  0.61950000  -0.82338509
  0.61950000  -0.82338684
  0.61950000  -0.82338858
  0.61950000  -0.82339032
  0.61950000  -0.82339206
  0.61950000  -0.82339379
  0.61950000  -0.82339552
  0.61950000  -0.82339725
  0.61950000  -0.82339898
  0.61950000  -0.82340070
  0.62000000  -0.82334492
  0.62000000  -0.82334675
  0.62000000  -0.82334857
  0.62000000  -0.82335040
  0.62000000  -0.82335221
  0.62000000  -0.82335403
  0.62000000  -0.82335584
  0.62000000  -0.82335765
  0.62000000  -0.82335946
  0.62000000  -0.82336126
  0.62000000  -0.82336306
  0.62000000  -0.82336486
  0.62000000  -0.82336665
  0.62000000  -0.82336844
  0.62000000  -0.82337023
  0.62000000  -0.82337202
  0.62000000  -0.82337380
  0.62000000  -0.82337558
  0.62000000  -0.82337736
  0.62000000  -0.82337913
  0.62000000  -0.82338090
  0.62000000  -0.82338267
  0.62000000  -0.82338443
  0.62000000  -0.82338619
  0.62000000  -0.82338795
  0.62000000  -0.82338971
  0.62000000  -0.82339146
  0.62000000  -0.82339321
  0.62000000  -0.82339496
  0.62000000  -0.82339670
  0.62000000  -0.82339844
  0.62000000  -0.82340018
  0.62000000  -0.82340192
  0.62000000  -0.82340365
  0.62000000  -0.82340538
  0.62000000  -0.82340711
  0.62000000  -0.82340883
  0.62000000  -0.82341055
  0.62000000  -0.82341227
  0.62000000  -0.82341399
  0.62050000  -0.82335843
  0.62050000  -0.82336025
  0.62050000  -0.82336207
  0.62050000  -0.82336388
  0.62050000  -0.82336570
  0.62050000  -0.82336750
  0.62050000  -0.82336931
  0.62050000  -0.82337111
  0.62050000  -0.82337291
  0.62050000  -0.82337471
  0.62050000  -0.82337650
  0.62050000  -0.82337829
  0.62050000  -0.82338008
  0.62050000  -0.82338186
  0.62050000  -0.82338364
  0.62050000  -0.82338542
  0.62050000  -0.82338720
  0.62050000  -0.82338897
  0.62050000  -0.82339074
  0.62050000  -0.82339250
  0.62050000  -0.82339427
  0.62050000  -0.82339603
  0.62050000  -0.82339778
  0.62050000  -0.82339954
  0.62050000  -0.82340129
  0.62050000  -0.82340304
  0.62050000  -0.82340479
  0.62050000  -0.82340653
  0.62050000  -0.82340827
  0.62050000  -0.82341001
  0.62050000  -0.82341174
  0.62050000  -0.82341347
  0.62050000  -0.82341520
  0.62050000  -0.82341693
  0.62050000  -0.82341865
  0.62050000  -0.82342037
  0.62050000  -0.82342209
  0.62050000  -0.82342380
  0.62050000  -0.82342551
  0.62050000  -0.82342722
  0.62100000  -0.82337188
  0.62100000  -0.82337370
  0.62100000  -0.82337551
  0.62100000  -0.82337731
  0.62100000  -0.82337912
  0.62100000  -0.82338092
  0.62100000  -0.82338272
  0.62100000  -0.82338451
  0.62100000  -0.82338630
  0.62100000  -0.82338809
  0.62100000  -0.82338988
  0.62100000  -0.82339166
  0.62100000  -0.82339344
  0.62100000  -0.82339522
  0.62100000  -0.82339699
  0.62100000  -0.82339876
  0.62100000  -0.82340053
  0.62100000  -0.82340230
  0.62100000  -0.82340406
  0.62100000  -0.82340582
  0.62100000  -0.82340757
  0.62100000  -0.82340933
  0.62100000  -0.82341108
  0.62100000  -0.82341282
  0.62100000  -0.82341457
  0.62100000  -0.82341631
  0.62100000  -0.82341805
  0.62100000  -0.82341979
  0.62100000  -0.82342152
  0.62100000  -0.82342325
  0.62100000  -0.82342498
  0.62100000  -0.82342670
  0.62100000  -0.82342842
  0.62100000  -0.82343014
  0.62100000  -0.82343186
  0.62100000  -0.82343357
  0.62100000  -0.82343528
  0.62100000  -0.82343699
  0.62100000  -0.82343869
  0.62100000  -0.82344040
  0.62150000  -0.82338527
  0.62150000  -0.82338708
  0.62150000  -0.82338888
  0.62150000  -0.82339068
  0.62150000  -0.82339248
  0.62150000  -0.82339427
  0.62150000  -0.82339606
  0.62150000  -0.82339785
  0.62150000  -0.82339964
  0.62150000  -0.82340142
  0.62150000  -0.82340320
  0.62150000  -0.82340497
  0.62150000  -0.82340675
  0.62150000  -0.82340852
  0.62150000  -0.82341028
  0.62150000  -0.82341205
  0.62150000  -0.82341381
  0.62150000  -0.82341556
  0.62150000  -0.82341732
  0.62150000  -0.82341907
  0.62150000  -0.82342082
  0.62150000  -0.82342257
  0.62150000  -0.82342431
  0.62150000  -0.82342605
  0.62150000  -0.82342779
  0.62150000  -0.82342952
  0.62150000  -0.82343126
  0.62150000  -0.82343298
  0.62150000  -0.82343471
  0.62150000  -0.82343643
  0.62150000  -0.82343815
  0.62150000  -0.82343987
  0.62150000  -0.82344159
  0.62150000  -0.82344330
  0.62150000  -0.82344501
  0.62150000  -0.82344671
  0.62150000  -0.82344842
  0.62150000  -0.82345012
  0.62150000  -0.82345182
  0.62150000  -0.82345351
  0.62200000  -0.82339861
  0.62200000  -0.82340041
  0.62200000  -0.82340220
  0.62200000  -0.82340399
  0.62200000  -0.82340578
  0.62200000  -0.82340757
  0.62200000  -0.82340935
  0.62200000  -0.82341113
  0.62200000  -0.82341291
  0.62200000  -0.82341469
  0.62200000  -0.82341646
  0.62200000  -0.82341823
  0.62200000  -0.82341999
  0.62200000  -0.82342175
  0.62200000  -0.82342351
  0.62200000  -0.82342527
  0.62200000  -0.82342702
  0.62200000  -0.82342878
  0.62200000  -0.82343052
  0.62200000  -0.82343227
  0.62200000  -0.82343401
  0.62200000  -0.82343575
  0.62200000  -0.82343749
  0.62200000  -0.82343922
  0.62200000  -0.82344095
  0.62200000  -0.82344268
  0.62200000  -0.82344440
  0.62200000  -0.82344612
  0.62200000  -0.82344784
  0.62200000  -0.82344956
  0.62200000  -0.82345127
  0.62200000  -0.82345298
  0.62200000  -0.82345469
  0.62200000  -0.82345640
  0.62200000  -0.82345810
  0.62200000  -0.82345980
  0.62200000  -0.82346149
  0.62200000  -0.82346319
  0.62200000  -0.82346488
  0.62200000  -0.82346657
  0.62250000  -0.82341188
  0.62250000  -0.82341367
  0.62250000  -0.82341546
  0.62250000  -0.82341725
  0.62250000  -0.82341903
  0.62250000  -0.82342081
  0.62250000  -0.82342258
  0.62250000  -0.82342436
  0.62250000  -0.82342613
  0.62250000  -0.82342789
  0.62250000  -0.82342966
  0.62250000  -0.82343142
  0.62250000  -0.82343318
  0.62250000  -0.82343493
  0.62250000  -0.82343669
  0.62250000  -0.82343844
  0.62250000  -0.82344018
  0.62250000  -0.82344193
  0.62250000  -0.82344367
  0.62250000  -0.82344541
  0.62250000  -0.82344714
  0.62250000  -0.82344887
  0.62250000  -0.82345060
  0.62250000  -0.82345233
  0.62250000  -0.82345405
  0.62250000  -0.82345577
  0.62250000  -0.82345749
  0.62250000  -0.82345921
  0.62250000  -0.82346092
  0.62250000  -0.82346263
  0.62250000  -0.82346433
  0.62250000  -0.82346604
  0.62250000  -0.82346774
  0.62250000  -0.82346944
  0.62250000  -0.82347113
  0.62250000  -0.82347282
  0.62250000  -0.82347451
  0.62250000  -0.82347620
  0.62250000  -0.82347789
  0.62250000  -0.82347957
  0.62300000  -0.82342510
  0.62300000  -0.82342688
  0.62300000  -0.82342866
  0.62300000  -0.82343044
  0.62300000  -0.82343221
  0.62300000  -0.82343399
  0.62300000  -0.82343576
  0.62300000  -0.82343752
  0.62300000  -0.82343929
  0.62300000  -0.82344105
  0.62300000  -0.82344280
  0.62300000  -0.82344456
  0.62300000  -0.82344631
  0.62300000  -0.82344806
  0.62300000  -0.82344980
  0.62300000  -0.82345154
  0.62300000  -0.82345328
  0.62300000  -0.82345502
  0.62300000  -0.82345675
  0.62300000  -0.82345849
  0.62300000  -0.82346021
  0.62300000  -0.82346194
  0.62300000  -0.82346366
  0.62300000  -0.82346538
  0.62300000  -0.82346710
  0.62300000  -0.82346881
  0.62300000  -0.82347052
  0.62300000  -0.82347223
  0.62300000  -0.82347393
  0.62300000  -0.82347564
  0.62300000  -0.82347734
  0.62300000  -0.82347903
  0.62300000  -0.82348073
  0.62300000  -0.82348242
  0.62300000  -0.82348411
  0.62300000  -0.82348579
  0.62300000  -0.82348748
  0.62300000  -0.82348916
  0.62300000  -0.82349083
  0.62300000  -0.82349251
  0.62350000  -0.82343825
  0.62350000  -0.82344003
  0.62350000  -0.82344180
  0.62350000  -0.82344357
  0.62350000  -0.82344534
  0.62350000  -0.82344711
  0.62350000  -0.82344887
  0.62350000  -0.82345063
  0.62350000  -0.82345238
  0.62350000  -0.82345414
  0.62350000  -0.82345589
  0.62350000  -0.82345763
  0.62350000  -0.82345938
  0.62350000  -0.82346112
  0.62350000  -0.82346286
  0.62350000  -0.82346459
  0.62350000  -0.82346633
  0.62350000  -0.82346806
  0.62350000  -0.82346978
  0.62350000  -0.82347151
  0.62350000  -0.82347323
  0.62350000  -0.82347495
  0.62350000  -0.82347666
  0.62350000  -0.82347837
  0.62350000  -0.82348008
  0.62350000  -0.82348179
  0.62350000  -0.82348349
  0.62350000  -0.82348520
  0.62350000  -0.82348689
  0.62350000  -0.82348859
  0.62350000  -0.82349028
  0.62350000  -0.82349197
  0.62350000  -0.82349366
  0.62350000  -0.82349534
  0.62350000  -0.82349703
  0.62350000  -0.82349870
  0.62350000  -0.82350038
  0.62350000  -0.82350205
  0.62350000  -0.82350372
  0.62350000  -0.82350539
  0.62400000  -0.82345135
  0.62400000  -0.82345312
  0.62400000  -0.82345489
  0.62400000  -0.82345665
  0.62400000  -0.82345841
  0.62400000  -0.82346017
  0.62400000  -0.82346192
  0.62400000  -0.82346368
  0.62400000  -0.82346543
  0.62400000  -0.82346717
  0.62400000  -0.82346891
  0.62400000  -0.82347065
  0.62400000  -0.82347239
  0.62400000  -0.82347413
  0.62400000  -0.82347586
  0.62400000  -0.82347759
  0.62400000  -0.82347931
  0.62400000  -0.82348103
  0.62400000  -0.82348275
  0.62400000  -0.82348447
  0.62400000  -0.82348619
  0.62400000  -0.82348790
  0.62400000  -0.82348960
  0.62400000  -0.82349131
  0.62400000  -0.82349301
  0.62400000  -0.82349471
  0.62400000  -0.82349641
  0.62400000  -0.82349810
  0.62400000  -0.82349980
  0.62400000  -0.82350148
  0.62400000  -0.82350317
  0.62400000  -0.82350485
  0.62400000  -0.82350653
  0.62400000  -0.82350821
  0.62400000  -0.82350989
  0.62400000  -0.82351156
  0.62400000  -0.82351323
  0.62400000  -0.82351489
  0.62400000  -0.82351656
  0.62400000  -0.82351822
  0.62450000  -0.82346439
  0.62450000  -0.82346615
  0.62450000  -0.82346791
  0.62450000  -0.82346967
  0.62450000  -0.82347142
  0.62450000  -0.82347317
  0.62450000  -0.82347492
  0.62450000  -0.82347667
  0.62450000  -0.82347841
  0.62450000  -0.82348015
  0.62450000  -0.82348188
  0.62450000  -0.82348362
  0.62450000  -0.82348535
  0.62450000  -0.82348707
  0.62450000  -0.82348880
  0.62450000  -0.82349052
  0.62450000  -0.82349224
  0.62450000  -0.82349395
  0.62450000  -0.82349567
  0.62450000  -0.82349738
  0.62450000  -0.82349908
  0.62450000  -0.82350079
  0.62450000  -0.82350249
  0.62450000  -0.82350419
  0.62450000  -0.82350588
  0.62450000  -0.82350758
  0.62450000  -0.82350927
  0.62450000  -0.82351096
  0.62450000  -0.82351264
  0.62450000  -0.82351432
  0.62450000  -0.82351600
  0.62450000  -0.82351768
  0.62450000  -0.82351935
  0.62450000  -0.82352102
  0.62450000  -0.82352269
  0.62450000  -0.82352435
  0.62450000  -0.82352602
  0.62450000  -0.82352768
  0.62450000  -0.82352933
  0.62450000  -0.82353099
  0.62500000  -0.82347737
  0.62500000  -0.82347913
  0.62500000  -0.82348088
  0.62500000  -0.82348263
  0.62500000  -0.82348438
  0.62500000  -0.82348612
  0.62500000  -0.82348786
  0.62500000  -0.82348960
  0.62500000  -0.82349134
  0.62500000  -0.82349307
  0.62500000  -0.82349480
  0.62500000  -0.82349652
  0.62500000  -0.82349825
  0.62500000  -0.82349997
  0.62500000  -0.82350168
  0.62500000  -0.82350340
  0.62500000  -0.82350511
  0.62500000  -0.82350682
  0.62500000  -0.82350852
  0.62500000  -0.82351023
  0.62500000  -0.82351193
  0.62500000  -0.82351362
  0.62500000  -0.82351532
  0.62500000  -0.82351701
  0.62500000  -0.82351870
  0.62500000  -0.82352039
  0.62500000  -0.82352207
  0.62500000  -0.82352375
  0.62500000  -0.82352543
  0.62500000  -0.82352710
  0.62500000  -0.82352877
  0.62500000  -0.82353044
  0.62500000  -0.82353211
  0.62500000  -0.82353377
  0.62500000  -0.82353544
  0.62500000  -0.82353709
  0.62500000  -0.82353875
  0.62500000  -0.82354040
  0.62500000  -0.82354205
  0.62500000  -0.82354370
  0.62550000  -0.82349030
  0.62550000  -0.82349205
  0.62550000  -0.82349379
  0.62550000  -0.82349554
  0.62550000  -0.82349728
  0.62550000  -0.82349901
  0.62550000  -0.82350075
  0.62550000  -0.82350248
  0.62550000  -0.82350420
  0.62550000  -0.82350593
  0.62550000  -0.82350765
  0.62550000  -0.82350937
  0.62550000  -0.82351109
  0.62550000  -0.82351280
  0.62550000  -0.82351451
  0.62550000  -0.82351622
  0.62550000  -0.82351792
  0.62550000  -0.82351962
  0.62550000  -0.82352132
  0.62550000  -0.82352302
  0.62550000  -0.82352471
  0.62550000  -0.82352640
  0.62550000  -0.82352809
  0.62550000  -0.82352978
  0.62550000  -0.82353146
  0.62550000  -0.82353314
  0.62550000  -0.82353481
  0.62550000  -0.82353649
  0.62550000  -0.82353816
  0.62550000  -0.82353983
  0.62550000  -0.82354149
  0.62550000  -0.82354315
  0.62550000  -0.82354481
  0.62550000  -0.82354647
  0.62550000  -0.82354813
  0.62550000  -0.82354978
  0.62550000  -0.82355143
  0.62550000  -0.82355307
  0.62550000  -0.82355472
  0.62550000  -0.82355636
  0.62600000  -0.82350317
  0.62600000  -0.82350491
  0.62600000  -0.82350665
  0.62600000  -0.82350838
  0.62600000  -0.82351012
  0.62600000  -0.82351184
  0.62600000  -0.82351357
  0.62600000  -0.82351530
  0.62600000  -0.82351702
  0.62600000  -0.82351873
  0.62600000  -0.82352045
  0.62600000  -0.82352216
  0.62600000  -0.82352387
  0.62600000  -0.82352558
  0.62600000  -0.82352728
  0.62600000  -0.82352898
  0.62600000  -0.82353068
  0.62600000  -0.82353237
  0.62600000  -0.82353407
  0.62600000  -0.82353575
  0.62600000  -0.82353744
  0.62600000  -0.82353912
  0.62600000  -0.82354081
  0.62600000  -0.82354248
  0.62600000  -0.82354416
  0.62600000  -0.82354583
  0.62600000  -0.82354750
  0.62600000  -0.82354917
  0.62600000  -0.82355083
  0.62600000  -0.82355249
  0.62600000  -0.82355415
  0.62600000  -0.82355581
  0.62600000  -0.82355746
  0.62600000  -0.82355911
  0.62600000  -0.82356076
  0.62600000  -0.82356240
  0.62600000  -0.82356405
  0.62600000  -0.82356569
  0.62600000  -0.82356732
  0.62600000  -0.82356896
  0.62650000  -0.82351598
  0.62650000  -0.82351771
  0.62650000  -0.82351944
  0.62650000  -0.82352117
  0.62650000  -0.82352290
  0.62650000  -0.82352462
  0.62650000  -0.82352634
  0.62650000  -0.82352806
  0.62650000  -0.82352977
  0.62650000  -0.82353148
  0.62650000  -0.82353319
  0.62650000  -0.82353489
  0.62650000  -0.82353660
  0.62650000  -0.82353830
  0.62650000  -0.82353999
  0.62650000  -0.82354169
  0.62650000  -0.82354338
  0.62650000  -0.82354507
  0.62650000  -0.82354675
  0.62650000  -0.82354843
  0.62650000  -0.82355011
  0.62650000  -0.82355179
  0.62650000  -0.82355346
  0.62650000  -0.82355514
  0.62650000  -0.82355680
  0.62650000  -0.82355847
  0.62650000  -0.82356013
  0.62650000  -0.82356179
  0.62650000  -0.82356345
  0.62650000  -0.82356510
  0.62650000  -0.82356676
  0.62650000  -0.82356841
  0.62650000  -0.82357005
  0.62650000  -0.82357170
  0.62650000  -0.82357334
  0.62650000  -0.82357497
  0.62650000  -0.82357661
  0.62650000  -0.82357824
  0.62650000  -0.82357987
  0.62650000  -0.82358150
  0.62700000  -0.82352873
  0.62700000  -0.82353046
  0.62700000  -0.82353218
  0.62700000  -0.82353391
  0.62700000  -0.82353562
  0.62700000  -0.82353734
  0.62700000  -0.82353905
  0.62700000  -0.82354076
  0.62700000  -0.82354247
  0.62700000  -0.82354417
  0.62700000  -0.82354587
  0.62700000  -0.82354757
  0.62700000  -0.82354927
  0.62700000  -0.82355096
  0.62700000  -0.82355265
  0.62700000  -0.82355434
  0.62700000  -0.82355602
  0.62700000  -0.82355770
  0.62700000  -0.82355938
  0.62700000  -0.82356106
  0.62700000  -0.82356273
  0.62700000  -0.82356440
  0.62700000  -0.82356607
  0.62700000  -0.82356773
  0.62700000  -0.82356939
  0.62700000  -0.82357105
  0.62700000  -0.82357271
  0.62700000  -0.82357436
  0.62700000  -0.82357601
  0.62700000  -0.82357766
  0.62700000  -0.82357930
  0.62700000  -0.82358095
  0.62700000  -0.82358259
  0.62700000  -0.82358422
  0.62700000  -0.82358586
  0.62700000  -0.82358749
  0.62700000  -0.82358912
  0.62700000  -0.82359074
  0.62700000  -0.82359237
  0.62700000  -0.82359399
  0.62750000  -0.82354143
  0.62750000  -0.82354315
  0.62750000  -0.82354487
  0.62750000  -0.82354658
  0.62750000  -0.82354829
  0.62750000  -0.82355000
  0.62750000  -0.82355171
  0.62750000  -0.82355341
  0.62750000  -0.82355511
  0.62750000  -0.82355681
  0.62750000  -0.82355850
  0.62750000  -0.82356019
  0.62750000  -0.82356188
  0.62750000  -0.82356357
  0.62750000  -0.82356525
  0.62750000  -0.82356693
  0.62750000  -0.82356861
  0.62750000  -0.82357028
  0.62750000  -0.82357195
  0.62750000  -0.82357362
  0.62750000  -0.82357529
  0.62750000  -0.82357695
  0.62750000  -0.82357861
  0.62750000  -0.82358027
  0.62750000  -0.82358193
  0.62750000  -0.82358358
  0.62750000  -0.82358523
  0.62750000  -0.82358687
  0.62750000  -0.82358852
  0.62750000  -0.82359016
  0.62750000  -0.82359180
  0.62750000  -0.82359343
  0.62750000  -0.82359507
  0.62750000  -0.82359670
  0.62750000  -0.82359832
  0.62750000  -0.82359995
  0.62750000  -0.82360157
  0.62750000  -0.82360319
  0.62750000  -0.82360481
  0.62750000  -0.82360642
  0.62800000  -0.82355407
  0.62800000  -0.82355579
  0.62800000  -0.82355750
  0.62800000  -0.82355920
  0.62800000  -0.82356091
  0.62800000  -0.82356261
  0.62800000  -0.82356431
  0.62800000  -0.82356600
  0.62800000  -0.82356770
  0.62800000  -0.82356939
  0.62800000  -0.82357108
  0.62800000  -0.82357276
  0.62800000  -0.82357444
  0.62800000  -0.82357612
  0.62800000  -0.82357780
  0.62800000  -0.82357947
  0.62800000  -0.82358114
  0.62800000  -0.82358281
  0.62800000  -0.82358447
  0.62800000  -0.82358613
  0.62800000  -0.82358779
  0.62800000  -0.82358945
  0.62800000  -0.82359110
  0.62800000  -0.82359275
  0.62800000  -0.82359440
  0.62800000  -0.82359605
  0.62800000  -0.82359769
  0.62800000  -0.82359933
  0.62800000  -0.82360097
  0.62800000  -0.82360260
  0.62800000  -0.82360423
  0.62800000  -0.82360586
  0.62800000  -0.82360749
  0.62800000  -0.82360911
  0.62800000  -0.82361073
  0.62800000  -0.82361235
  0.62800000  -0.82361397
  0.62800000  -0.82361558
  0.62800000  -0.82361719
  0.62800000  -0.82361880
  0.62850000  -0.82356666
  0.62850000  -0.82356836
  0.62850000  -0.82357007
  0.62850000  -0.82357177
  0.62850000  -0.82357347
  0.62850000  -0.82357516
  0.62850000  -0.82357685
  0.62850000  -0.82357854
  0.62850000  -0.82358023
  0.62850000  -0.82358191
  0.62850000  -0.82358359
  0.62850000  -0.82358527
  0.62850000  -0.82358694
  0.62850000  -0.82358862
  0.62850000  -0.82359029
  0.62850000  -0.82359195
  0.62850000  -0.82359362
  0.62850000  -0.82359528
  0.62850000  -0.82359693
  0.62850000  -0.82359859
  0.62850000  -0.82360024
  0.62850000  -0.82360189
  0.62850000  -0.82360354
  0.62850000  -0.82360518
  0.62850000  -0.82360682
  0.62850000  -0.82360846
  0.62850000  -0.82361010
  0.62850000  -0.82361173
  0.62850000  -0.82361336
  0.62850000  -0.82361499
  0.62850000  -0.82361662
  0.62850000  -0.82361824
  0.62850000  -0.82361986
  0.62850000  -0.82362147
  0.62850000  -0.82362309
  0.62850000  -0.82362470
  0.62850000  -0.82362631
  0.62850000  -0.82362792
  0.62850000  -0.82362952
  0.62850000  -0.82363112
  0.62900000  -0.82357919
  0.62900000  -0.82358089
  0.62900000  -0.82358258
  0.62900000  -0.82358428
  0.62900000  -0.82358597
  0.62900000  -0.82358766
  0.62900000  -0.82358934
  0.62900000  -0.82359102
  0.62900000  -0.82359270
  0.62900000  -0.82359438
  0.62900000  -0.82359605
  0.62900000  -0.82359772
  0.62900000  -0.82359939
  0.62900000  -0.82360106
  0.62900000  -0.82360272
  0.62900000  -0.82360438
  0.62900000  -0.82360604
  0.62900000  -0.82360769
  0.62900000  -0.82360934
  0.62900000  -0.82361099
  0.62900000  -0.82361263
  0.62900000  -0.82361428
  0.62900000  -0.82361592
  0.62900000  -0.82361756
  0.62900000  -0.82361919
  0.62900000  -0.82362082
  0.62900000  -0.82362245
  0.62900000  -0.82362408
  0.62900000  -0.82362570
  0.62900000  -0.82362732
  0.62900000  -0.82362894
  0.62900000  -0.82363056
  0.62900000  -0.82363217
  0.62900000  -0.82363378
  0.62900000  -0.82363539
  0.62900000  -0.82363699
  0.62900000  -0.82363860
  0.62900000  -0.82364020
  0.62900000  -0.82364179
  0.62900000  -0.82364339
  0.62950000  -0.82359166
  0.62950000  -0.82359336
  0.62950000  -0.82359504
  0.62950000  -0.82359673
  0.62950000  -0.82359842
  0.62950000  -0.82360010
  0.62950000  -0.82360177
  0.62950000  -0.82360345
  0.62950000  -0.82360512
  0.62950000  -0.82360679
  0.62950000  -0.82360846
  0.62950000  -0.82361012
  0.62950000  -0.82361178
  0.62950000  -0.82361344
  0.62950000  -0.82361510
  0.62950000  -0.82361675
  0.62950000  -0.82361840
  0.62950000  -0.82362005
  0.62950000  -0.82362169
  0.62950000  -0.82362333
  0.62950000  -0.82362497
  0.62950000  -0.82362661
  0.62950000  -0.82362824
  0.62950000  -0.82362987
  0.62950000  -0.82363150
  0.62950000  -0.82363313
  0.62950000  -0.82363475
  0.62950000  -0.82363637
  0.62950000  -0.82363799
  0.62950000  -0.82363960
  0.62950000  -0.82364121
  0.62950000  -0.82364282
  0.62950000  -0.82364443
  0.62950000  -0.82364603
  0.62950000  -0.82364763
  0.62950000  -0.82364923
  0.62950000  -0.82365083
  0.62950000  -0.82365242
  0.62950000  -0.82365401
  0.62950000  -0.82365560
  0.63000000  -0.82360408
  0.63000000  -0.82360577
  0.63000000  -0.82360745
  0.63000000  -0.82360913
  0.63000000  -0.82361081
  0.63000000  -0.82361248
  0.63000000  -0.82361415
  0.63000000  -0.82361582
  0.63000000  -0.82361749
  0.63000000  -0.82361915
  0.63000000  -0.82362081
  0.63000000  -0.82362247
  0.63000000  -0.82362412
  0.63000000  -0.82362577
  0.63000000  -0.82362742
  0.63000000  -0.82362907
  0.63000000  -0.82363071
  0.63000000  -0.82363235
  0.63000000  -0.82363399
  0.63000000  -0.82363562
  0.63000000  -0.82363726
  0.63000000  -0.82363889
  0.63000000  -0.82364051
  0.63000000  -0.82364214
  0.63000000  -0.82364376
  0.63000000  -0.82364538
  0.63000000  -0.82364699
  0.63000000  -0.82364861
  0.63000000  -0.82365022
  0.63000000  -0.82365183
  0.63000000  -0.82365343
  0.63000000  -0.82365503
  0.63000000  -0.82365663
  0.63000000  -0.82365823
  0.63000000  -0.82365983
  0.63000000  -0.82366142
  0.63000000  -0.82366301
  0.63000000  -0.82366459
  0.63000000  -0.82366618
  0.63000000  -0.82366776
  0.63050000  -0.82361645
  0.63050000  -0.82361812
  0.63050000  -0.82361980
  0.63050000  -0.82362147
  0.63050000  -0.82362314
  0.63050000  -0.82362481
  0.63050000  -0.82362648
  0.63050000  -0.82362814
  0.63050000  -0.82362980
  0.63050000  -0.82363145
  0.63050000  -0.82363311
  0.63050000  -0.82363476
  0.63050000  -0.82363640
  0.63050000  -0.82363805
  0.63050000  -0.82363969
  0.63050000  -0.82364133
  0.63050000  -0.82364297
  0.63050000  -0.82364460
  0.63050000  -0.82364623
  0.63050000  -0.82364786
  0.63050000  -0.82364949
  0.63050000  -0.82365111
  0.63050000  -0.82365273
  0.63050000  -0.82365435
  0.63050000  -0.82365596
  0.63050000  -0.82365757
  0.63050000  -0.82365918
  0.63050000  -0.82366079
  0.63050000  -0.82366239
  0.63050000  -0.82366399
  0.63050000  -0.82366559
  0.63050000  -0.82366719
  0.63050000  -0.82366878
  0.63050000  -0.82367037
  0.63050000  -0.82367196
  0.63050000  -0.82367355
  0.63050000  -0.82367513
  0.63050000  -0.82367671
  0.63050000  -0.82367829
  0.63050000  -0.82367986
  0.63100000  -0.82362876
  0.63100000  -0.82363043
  0.63100000  -0.82363210
  0.63100000  -0.82363376
  0.63100000  -0.82363543
  0.63100000  -0.82363709
  0.63100000  -0.82363874
  0.63100000  -0.82364040
  0.63100000  -0.82364205
  0.63100000  -0.82364370
  0.63100000  -0.82364535
  0.63100000  -0.82364699
  0.63100000  -0.82364863
  0.63100000  -0.82365027
  0.63100000  -0.82365190
  0.63100000  -0.82365354
  0.63100000  -0.82365517
  0.63100000  -0.82365679
  0.63100000  -0.82365842
  0.63100000  -0.82366004
  0.63100000  -0.82366166
  0.63100000  -0.82366328
  0.63100000  -0.82366489
  0.63100000  -0.82366650
  0.63100000  -0.82366811
  0.63100000  -0.82366971
  0.63100000  -0.82367132
  0.63100000  -0.82367292
  0.63100000  -0.82367452
  0.63100000  -0.82367611
  0.63100000  -0.82367770
  0.63100000  -0.82367929
  0.63100000  -0.82368088
  0.63100000  -0.82368246
  0.63100000  -0.82368405
  0.63100000  -0.82368562
  0.63100000  -0.82368720
  0.63100000  -0.82368877
  0.63100000  -0.82369035
  0.63100000  -0.82369191
  0.63150000  -0.82364101
  0.63150000  -0.82364267
  0.63150000  -0.82364434
  0.63150000  -0.82364600
  0.63150000  -0.82364765
  0.63150000  -0.82364931
  0.63150000  -0.82365096
  0.63150000  -0.82365261
  0.63150000  -0.82365425
  0.63150000  -0.82365589
  0.63150000  -0.82365753
  0.63150000  -0.82365917
  0.63150000  -0.82366080
  0.63150000  -0.82366244
  0.63150000  -0.82366406
  0.63150000  -0.82366569
  0.63150000  -0.82366731
  0.63150000  -0.82366893
  0.63150000  -0.82367055
  0.63150000  -0.82367217
  0.63150000  -0.82367378
  0.63150000  -0.82367539
  0.63150000  -0.82367700
  0.63150000  -0.82367860
  0.63150000  -0.82368020
  0.63150000  -0.82368180
  0.63150000  -0.82368340
  0.63150000  -0.82368499
  0.63150000  -0.82368658
  0.63150000  -0.82368817
  0.63150000  -0.82368976
  0.63150000  -0.82369134
  0.63150000  -0.82369292
  0.63150000  -0.82369450
  0.63150000  -0.82369607
  0.63150000  -0.82369765
  0.63150000  -0.82369922
  0.63150000  -0.82370078
  0.63150000  -0.82370235
  0.63150000  -0.82370391
  0.63200000  -0.82365321
  0.63200000  -0.82365487
  0.63200000  -0.82365652
  0.63200000  -0.82365818
  0.63200000  -0.82365983
  0.63200000  -0.82366147
  0.63200000  -0.82366312
  0.63200000  -0.82366476
  0.63200000  -0.82366640
  0.63200000  -0.82366803
  0.63200000  -0.82366967
  0.63200000  -0.82367130
  0.63200000  -0.82367292
  0.63200000  -0.82367455
  0.63200000  -0.82367617
  0.63200000  -0.82367779
  0.63200000  -0.82367941
  0.63200000  -0.82368102
  0.63200000  -0.82368263
  0.63200000  -0.82368424
  0.63200000  -0.82368585
  0.63200000  -0.82368745
  0.63200000  -0.82368905
  0.63200000  -0.82369065
  0.63200000  -0.82369224
  0.63200000  -0.82369384
  0.63200000  -0.82369543
  0.63200000  -0.82369701
  0.63200000  -0.82369860
  0.63200000  -0.82370018
  0.63200000  -0.82370176
  0.63200000  -0.82370333
  0.63200000  -0.82370491
  0.63200000  -0.82370648
  0.63200000  -0.82370805
  0.63200000  -0.82370962
  0.63200000  -0.82371118
  0.63200000  -0.82371274
  0.63200000  -0.82371430
  0.63200000  -0.82371585
  0.63250000  -0.82366536
  0.63250000  -0.82366701
  0.63250000  -0.82366866
  0.63250000  -0.82367030
  0.63250000  -0.82367195
  0.63250000  -0.82367359
  0.63250000  -0.82367522
  0.63250000  -0.82367686
  0.63250000  -0.82367849
  0.63250000  -0.82368012
  0.63250000  -0.82368175
  0.63250000  -0.82368337
  0.63250000  -0.82368499
  0.63250000  -0.82368661
  0.63250000  -0.82368822
  0.63250000  -0.82368984
  0.63250000  -0.82369145
  0.63250000  -0.82369305
  0.63250000  -0.82369466
  0.63250000  -0.82369626
  0.63250000  -0.82369786
  0.63250000  -0.82369946
  0.63250000  -0.82370105
  0.63250000  -0.82370264
  0.63250000  -0.82370423
  0.63250000  -0.82370582
  0.63250000  -0.82370740
  0.63250000  -0.82370898
  0.63250000  -0.82371056
  0.63250000  -0.82371213
  0.63250000  -0.82371371
  0.63250000  -0.82371528
  0.63250000  -0.82371684
  0.63250000  -0.82371841
  0.63250000  -0.82371997
  0.63250000  -0.82372153
  0.63250000  -0.82372309
  0.63250000  -0.82372464
  0.63250000  -0.82372619
  0.63250000  -0.82372774
  0.63300000  -0.82367745
  0.63300000  -0.82367909
  0.63300000  -0.82368073
  0.63300000  -0.82368237
  0.63300000  -0.82368401
  0.63300000  -0.82368564
  0.63300000  -0.82368727
  0.63300000  -0.82368890
  0.63300000  -0.82369053
  0.63300000  -0.82369215
  0.63300000  -0.82369377
  0.63300000  -0.82369539
  0.63300000  -0.82369700
  0.63300000  -0.82369861
  0.63300000  -0.82370022
  0.63300000  -0.82370183
  0.63300000  -0.82370343
  0.63300000  -0.82370503
  0.63300000  -0.82370663
  0.63300000  -0.82370823
  0.63300000  -0.82370982
  0.63300000  -0.82371141
  0.63300000  -0.82371300
  0.63300000  -0.82371458
  0.63300000  -0.82371616
  0.63300000  -0.82371774
  0.63300000  -0.82371932
  0.63300000  -0.82372089
  0.63300000  -0.82372246
  0.63300000  -0.82372403
  0.63300000  -0.82372560
  0.63300000  -0.82372716
  0.63300000  -0.82372872
  0.63300000  -0.82373028
  0.63300000  -0.82373184
  0.63300000  -0.82373339
  0.63300000  -0.82373494
  0.63300000  -0.82373649
  0.63300000  -0.82373804
  0.63300000  -0.82373958
  0.63350000  -0.82368949
  0.63350000  -0.82369112
  0.63350000  -0.82369276
  0.63350000  -0.82369439
  0.63350000  -0.82369602
  0.63350000  -0.82369765
  0.63350000  -0.82369927
  0.63350000  -0.82370089
  0.63350000  -0.82370251
  0.63350000  -0.82370413
  0.63350000  -0.82370574
  0.63350000  -0.82370735
  0.63350000  -0.82370896
  0.63350000  -0.82371057
  0.63350000  -0.82371217
  0.63350000  -0.82371377
  0.63350000  -0.82371536
  0.63350000  -0.82371696
  0.63350000  -0.82371855
  0.63350000  -0.82372014
  0.63350000  -0.82372172
  0.63350000  -0.82372331
  0.63350000  -0.82372489
  0.63350000  -0.82372647
  0.63350000  -0.82372804
  0.63350000  -0.82372962
  0.63350000  -0.82373119
  0.63350000  -0.82373275
  0.63350000  -0.82373432
  0.63350000  -0.82373588
  0.63350000  -0.82373744
  0.63350000  -0.82373900
  0.63350000  -0.82374055
  0.63350000  -0.82374211
  0.63350000  -0.82374366
  0.63350000  -0.82374520
  0.63350000  -0.82374675
  0.63350000  -0.82374829
  0.63350000  -0.82374983
  0.63350000  -0.82375137
  0.63400000  -0.82370147
  0.63400000  -0.82370310
  0.63400000  -0.82370473
  0.63400000  -0.82370636
  0.63400000  -0.82370798
  0.63400000  -0.82370960
  0.63400000  -0.82371122
  0.63400000  -0.82371283
  0.63400000  -0.82371444
  0.63400000  -0.82371605
  0.63400000  -0.82371766
  0.63400000  -0.82371926
  0.63400000  -0.82372087
  0.63400000  -0.82372246
  0.63400000  -0.82372406
  0.63400000  -0.82372565
  0.63400000  -0.82372724
  0.63400000  -0.82372883
  0.63400000  -0.82373042
  0.63400000  -0.82373200
  0.63400000  -0.82373358
  0.63400000  -0.82373515
  0.63400000  -0.82373673
  0.63400000  -0.82373830
  0.63400000  -0.82373987
  0.63400000  -0.82374144
  0.63400000  -0.82374300
  0.63400000  -0.82374456
  0.63400000  -0.82374612
  0.63400000  -0.82374768
  0.63400000  -0.82374923
  0.63400000  -0.82375078
  0.63400000  -0.82375233
  0.63400000  -0.82375388
  0.63400000  -0.82375542
  0.63400000  -0.82375696
  0.63400000  -0.82375850
  0.63400000  -0.82376003
  0.63400000  -0.82376157
  0.63400000  -0.82376310
  0.63450000  -0.82371340
  0.63450000  -0.82371503
  0.63450000  -0.82371665
  0.63450000  -0.82371827
  0.63450000  -0.82371989
  0.63450000  -0.82372150
  0.63450000  -0.82372311
  0.63450000  -0.82372472
  0.63450000  -0.82372632
  0.63450000  -0.82372793
  0.63450000  -0.82372953
  0.63450000  -0.82373112
  0.63450000  -0.82373272
  0.63450000  -0.82373431
  0.63450000  -0.82373590
  0.63450000  -0.82373749
  0.63450000  -0.82373907
  0.63450000  -0.82374065
  0.63450000  -0.82374223
  0.63450000  -0.82374380
  0.63450000  -0.82374538
  0.63450000  -0.82374695
  0.63450000  -0.82374852
  0.63450000  -0.82375008
  0.63450000  -0.82375164
  0.63450000  -0.82375320
  0.63450000  -0.82375476
  0.63450000  -0.82375632
  0.63450000  -0.82375787
  0.63450000  -0.82375942
  0.63450000  -0.82376097
  0.63450000  -0.82376251
  0.63450000  -0.82376405
  0.63450000  -0.82376559
  0.63450000  -0.82376713
  0.63450000  -0.82376866
  0.63450000  -0.82377020
  0.63450000  -0.82377172
  0.63450000  -0.82377325
  0.63450000  -0.82377478
  0.63500000  -0.82372528
  0.63500000  -0.82372690
  0.63500000  -0.82372852
  0.63500000  -0.82373013
  0.63500000  -0.82373174
  0.63500000  -0.82373334
  0.63500000  -0.82373495
  0.63500000  -0.82373655
  0.63500000  -0.82373815
  0.63500000  -0.82373975
  0.63500000  -0.82374134
  0.63500000  -0.82374293
  0.63500000  -0.82374452
  0.63500000  -0.82374610
  0.63500000  -0.82374769
  0.63500000  -0.82374927
  0.63500000  -0.82375084
  0.63500000  -0.82375242
  0.63500000  -0.82375399
  0.63500000  -0.82375556
  0.63500000  -0.82375713
  0.63500000  -0.82375869
  0.63500000  -0.82376025
  0.63500000  -0.82376181
  0.63500000  -0.82376337
  0.63500000  -0.82376492
  0.63500000  -0.82376647
  0.63500000  -0.82376802
  0.63500000  -0.82376957
  0.63500000  -0.82377111
  0.63500000  -0.82377265
  0.63500000  -0.82377419
  0.63500000  -0.82377572
  0.63500000  -0.82377726
  0.63500000  -0.82377879
  0.63500000  -0.82378032
  0.63500000  -0.82378184
  0.63500000  -0.82378336
  0.63500000  -0.82378488
  0.63500000  -0.82378640
  0.63550000  -0.82373711
  0.63550000  -0.82373872
  0.63550000  -0.82374033
  0.63550000  -0.82374193
  0.63550000  -0.82374354
  0.63550000  -0.82374514
  0.63550000  -0.82374673
  0.63550000  -0.82374833
  0.63550000  -0.82374992
  0.63550000  -0.82375151
  0.63550000  -0.82375310
  0.63550000  -0.82375468
  0.63550000  -0.82375626
  0.63550000  -0.82375784
  0.63550000  -0.82375942
  0.63550000  -0.82376099
  0.63550000  -0.82376256
  0.63550000  -0.82376413
  0.63550000  -0.82376570
  0.63550000  -0.82376726
  0.63550000  -0.82376882
  0.63550000  -0.82377038
  0.63550000  -0.82377193
  0.63550000  -0.82377349
  0.63550000  -0.82377504
  0.63550000  -0.82377658
  0.63550000  -0.82377813
  0.63550000  -0.82377967
  0.63550000  -0.82378121
  0.63550000  -0.82378275
  0.63550000  -0.82378428
  0.63550000  -0.82378581
  0.63550000  -0.82378734
  0.63550000  -0.82378887
  0.63550000  -0.82379039
  0.63550000  -0.82379192
  0.63550000  -0.82379343
  0.63550000  -0.82379495
  0.63550000  -0.82379647
  0.63550000  -0.82379798
  0.63600000  -0.82374888
  0.63600000  -0.82375049
  0.63600000  -0.82375209
  0.63600000  -0.82375369
  0.63600000  -0.82375528
  0.63600000  -0.82375688
  0.63600000  -0.82375847
  0.63600000  -0.82376006
  0.63600000  -0.82376164
  0.63600000  -0.82376323
  0.63600000  -0.82376481
  0.63600000  -0.82376638
  0.63600000  -0.82376796
  0.63600000  -0.82376953
  0.63600000  -0.82377110
  0.63600000  -0.82377267
  0.63600000  -0.82377423
  0.63600000  -0.82377579
  0.63600000  -0.82377735
  0.63600000  -0.82377891
  0.63600000  -0.82378046
  0.63600000  -0.82378202
  0.63600000  -0.82378356
  0.63600000  -0.82378511
  0.63600000  -0.82378665
  0.63600000  -0.82378819
  0.63600000  -0.82378973
  0.63600000  -0.82379127
  0.63600000  -0.82379280
  0.63600000  -0.82379433
  0.63600000  -0.82379586
  0.63600000  -0.82379739
  0.63600000  -0.82379891
  0.63600000  -0.82380043
  0.63600000  -0.82380195
  0.63600000  -0.82380346
  0.63600000  -0.82380498
  0.63600000  -0.82380649
  0.63600000  -0.82380800
  0.63600000  -0.82380950
  0.63650000  -0.82376060
  0.63650000  -0.82376220
  0.63650000  -0.82376380
  0.63650000  -0.82376539
  0.63650000  -0.82376698
  0.63650000  -0.82376857
  0.63650000  -0.82377015
  0.63650000  -0.82377173
  0.63650000  -0.82377331
  0.63650000  -0.82377489
  0.63650000  -0.82377646
  0.63650000  -0.82377803
  0.63650000  -0.82377960
  0.63650000  -0.82378117
  0.63650000  -0.82378273
  0.63650000  -0.82378429
  0.63650000  -0.82378585
  0.63650000  -0.82378741
  0.63650000  -0.82378896
  0.63650000  -0.82379051
  0.63650000  -0.82379206
  0.63650000  -0.82379360
  0.63650000  -0.82379514
  0.63650000  -0.82379668
  0.63650000  -0.82379822
  0.63650000  -0.82379975
  0.63650000  -0.82380129
  0.63650000  -0.82380282
  0.63650000  -0.82380434
  0.63650000  -0.82380587
  0.63650000  -0.82380739
  0.63650000  -0.82380891
  0.63650000  -0.82381043
  0.63650000  -0.82381194
  0.63650000  -0.82381345
  0.63650000  -0.82381496
  0.63650000  -0.82381647
  0.63650000  -0.82381797
  0.63650000  -0.82381947
  0.63650000  -0.82382097
  0.63700000  -0.82377227
  0.63700000  -0.82377386
  0.63700000  -0.82377545
  0.63700000  -0.82377704
  0.63700000  -0.82377862
  0.63700000  -0.82378020
  0.63700000  -0.82378178
  0.63700000  -0.82378336
  0.63700000  -0.82378493
  0.63700000  -0.82378650
  0.63700000  -0.82378807
  0.63700000  -0.82378963
  0.63700000  -0.82379119
  0.63700000  -0.82379275
  0.63700000  -0.82379431
  0.63700000  -0.82379586
  0.63700000  -0.82379741
  0.63700000  -0.82379896
  0.63700000  -0.82380051
  0.63700000  -0.82380205
  0.63700000  -0.82380360
  0.63700000  -0.82380513
  0.63700000  -0.82380667
  0.63700000  -0.82380820
  0.63700000  -0.82380973
  0.63700000  -0.82381126
  0.63700000  -0.82381279
  0.63700000  -0.82381431
  0.63700000  -0.82381583
  0.63700000  -0.82381735
  0.63700000  -0.82381887
  0.63700000  -0.82382038
  0.63700000  -0.82382189
  0.63700000  -0.82382340
  0.63700000  -0.82382490
  0.63700000  -0.82382641
  0.63700000  -0.82382791
  0.63700000  -0.82382940
  0.63700000  -0.82383090
  0.63700000  -0.82383239
  0.63750000  -0.82378389
  0.63750000  -0.82378547
  0.63750000  -0.82378706
  0.63750000  -0.82378864
  0.63750000  -0.82379021
  0.63750000  -0.82379179
  0.63750000  -0.82379336
  0.63750000  -0.82379493
  0.63750000  -0.82379649
  0.63750000  -0.82379806
  0.63750000  -0.82379962
  0.63750000  -0.82380118
  0.63750000  -0.82380273
  0.63750000  -0.82380429
  0.63750000  -0.82380584
  0.63750000  -0.82380738
  0.63750000  -0.82380893
  0.63750000  -0.82381047
  0.63750000  -0.82381201
  0.63750000  -0.82381355
  0.63750000  -0.82381508
  0.63750000  -0.82381662
  0.63750000  -0.82381815
  0.63750000  -0.82381967
  0.63750000  -0.82382120
  0.63750000  -0.82382272
  0.63750000  -0.82382424
  0.63750000  -0.82382576
  0.63750000  -0.82382727
  0.63750000  -0.82382878
  0.63750000  -0.82383029
  0.63750000  -0.82383180
  0.63750000  -0.82383330
  0.63750000  -0.82383480
  0.63750000  -0.82383630
  0.63750000  -0.82383780
  0.63750000  -0.82383929
  0.63750000  -0.82384079
  0.63750000  -0.82384228
  0.63750000  -0.82384376
  0.63800000  -0.82379545
  0.63800000  -0.82379703
  0.63800000  -0.82379861
  0.63800000  -0.82380018
  0.63800000  -0.82380175
  0.63800000  -0.82380332
  0.63800000  -0.82380488
  0.63800000  -0.82380645
  0.63800000  -0.82380801
  0.63800000  -0.82380956
  0.63800000  -0.82381112
  0.63800000  -0.82381267
  0.63800000  -0.82381422
  0.63800000  -0.82381577
  0.63800000  -0.82381731
  0.63800000  -0.82381885
  0.63800000  -0.82382039
  0.63800000  -0.82382193
  0.63800000  -0.82382346
  0.63800000  -0.82382499
  0.63800000  -0.82382652
  0.63800000  -0.82382805
  0.63800000  -0.82382957
  0.63800000  -0.82383109
  0.63800000  -0.82383261
  0.63800000  -0.82383412
  0.63800000  -0.82383564
  0.63800000  -0.82383715
  0.63800000  -0.82383866
  0.63800000  -0.82384016
  0.63800000  -0.82384167
  0.63800000  -0.82384317
  0.63800000  -0.82384466
  0.63800000  -0.82384616
  0.63800000  -0.82384765
  0.63800000  -0.82384914
  0.63800000  -0.82385063
  0.63800000  -0.82385212
  0.63800000  -0.82385360
  0.63800000  -0.82385508
  0.63850000  -0.82380697
  0.63850000  -0.82380854
  0.63850000  -0.82381011
  0.63850000  -0.82381168
  0.63850000  -0.82381324
  0.63850000  -0.82381480
  0.63850000  -0.82381636
  0.63850000  -0.82381792
  0.63850000  -0.82381947
  0.63850000  -0.82382102
  0.63850000  -0.82382257
  0.63850000  -0.82382411
  0.63850000  -0.82382566
  0.63850000  -0.82382720
  0.63850000  -0.82382873
  0.63850000  -0.82383027
  0.63850000  -0.82383180
  0.63850000  -0.82383333
  0.63850000  -0.82383486
  0.63850000  -0.82383638
  0.63850000  -0.82383791
  0.63850000  -0.82383943
  0.63850000  -0.82384094
  0.63850000  -0.82384246
  0.63850000  -0.82384397
  0.63850000  -0.82384548
  0.63850000  -0.82384699
  0.63850000  -0.82384849
  0.63850000  -0.82384999
  0.63850000  -0.82385149
  0.63850000  -0.82385299
  0.63850000  -0.82385448
  0.63850000  -0.82385598
  0.63850000  -0.82385746
  0.63850000  -0.82385895
  0.63850000  -0.82386044
  0.63850000  -0.82386192
  0.63850000  -0.82386340
  0.63850000  -0.82386488
  0.63850000  -0.82386635
  0.63900000  -0.82381843
  0.63900000  -0.82382000
  0.63900000  -0.82382156
  0.63900000  -0.82382312
  0.63900000  -0.82382468
  0.63900000  -0.82382623
  0.63900000  -0.82382778
  0.63900000  -0.82382933
  0.63900000  -0.82383088
  0.63900000  -0.82383242
  0.63900000  -0.82383397
  0.63900000  -0.82383551
  0.63900000  -0.82383704
  0.63900000  -0.82383858
  0.63900000  -0.82384011
  0.63900000  -0.82384164
  0.63900000  -0.82384316
  0.63900000  -0.82384469
  0.63900000  -0.82384621
  0.63900000  -0.82384773
  0.63900000  -0.82384924
  0.63900000  -0.82385075
  0.63900000  -0.82385227
  0.63900000  -0.82385377
  0.63900000  -0.82385528
  0.63900000  -0.82385678
  0.63900000  -0.82385828
  0.63900000  -0.82385978
  0.63900000  -0.82386128
  0.63900000  -0.82386277
  0.63900000  -0.82386426
  0.63900000  -0.82386575
  0.63900000  -0.82386724
  0.63900000  -0.82386872
  0.63900000  -0.82387020
  0.63900000  -0.82387168
  0.63900000  -0.82387315
  0.63900000  -0.82387463
  0.63900000  -0.82387610
  0.63900000  -0.82387757
  0.63950000  -0.82382984
  0.63950000  -0.82383140
  0.63950000  -0.82383296
  0.63950000  -0.82383451
  0.63950000  -0.82383606
  0.63950000  -0.82383761
  0.63950000  -0.82383916
  0.63950000  -0.82384070
  0.63950000  -0.82384224
  0.63950000  -0.82384378
  0.63950000  -0.82384531
  0.63950000  -0.82384685
  0.63950000  -0.82384838
  0.63950000  -0.82384990
  0.63950000  -0.82385143
  0.63950000  -0.82385295
  0.63950000  -0.82385447
  0.63950000  -0.82385599
  0.63950000  -0.82385750
  0.63950000  -0.82385902
  0.63950000  -0.82386053
  0.63950000  -0.82386203
  0.63950000  -0.82386354
  0.63950000  -0.82386504
  0.63950000  -0.82386654
  0.63950000  -0.82386804
  0.63950000  -0.82386953
  0.63950000  -0.82387102
  0.63950000  -0.82387251
  0.63950000  -0.82387400
  0.63950000  -0.82387548
  0.63950000  -0.82387697
  0.63950000  -0.82387845
  0.63950000  -0.82387992
  0.63950000  -0.82388140
  0.63950000  -0.82388287
  0.63950000  -0.82388434
  0.63950000  -0.82388581
  0.63950000  -0.82388727
  0.63950000  -0.82388874
  0.64000000  -0.82384120
  0.64000000  -0.82384275
  0.64000000  -0.82384430
  0.64000000  -0.82384585
  0.64000000  -0.82384740
  0.64000000  -0.82384894
  0.64000000  -0.82385048
  0.64000000  -0.82385202
  0.64000000  -0.82385355
  0.64000000  -0.82385508
  0.64000000  -0.82385661
  0.64000000  -0.82385814
  0.64000000  -0.82385966
  0.64000000  -0.82386118
  0.64000000  -0.82386270
  0.64000000  -0.82386422
  0.64000000  -0.82386573
  0.64000000  -0.82386724
  0.64000000  -0.82386875
  0.64000000  -0.82387026
  0.64000000  -0.82387176
  0.64000000  -0.82387326
  0.64000000  -0.82387476
  0.64000000  -0.82387626
  0.64000000  -0.82387775
  0.64000000  -0.82387924
  0.64000000  -0.82388073
  0.64000000  -0.82388221
  0.64000000  -0.82388370
  0.64000000  -0.82388518
  0.64000000  -0.82388666
  0.64000000  -0.82388813
  0.64000000  -0.82388961
  0.64000000  -0.82389108
  0.64000000  -0.82389255
  0.64000000  -0.82389401
  0.64000000  -0.82389548
  0.64000000  -0.82389694
  0.64000000  -0.82389840
  0.64000000  -0.82389985
  0.64050000  -0.82385251
  0.64050000  -0.82385406
  0.64050000  -0.82385560
  0.64050000  -0.82385714
  0.64050000  -0.82385868
  0.64050000  -0.82386022
  0.64050000  -0.82386175
  0.64050000  -0.82386328
  0.64050000  -0.82386481
  0.64050000  -0.82386633
  0.64050000  -0.82386786
  0.64050000  -0.82386938
  0.64050000  -0.82387090
  0.64050000  -0.82387241
  0.64050000  -0.82387392
  0.64050000  -0.82387543
  0.64050000  -0.82387694
  0.64050000  -0.82387845
  0.64050000  -0.82387995
  0.64050000  -0.82388145
  0.64050000  -0.82388294
  0.64050000  -0.82388444
  0.64050000  -0.82388593
  0.64050000  -0.82388742
  0.64050000  -0.82388891
  0.64050000  -0.82389039
  0.64050000  -0.82389188
  0.64050000  -0.82389335
  0.64050000  -0.82389483
  0.64050000  -0.82389631
  0.64050000  -0.82389778
  0.64050000  -0.82389925
  0.64050000  -0.82390072
  0.64050000  -0.82390218
  0.64050000  -0.82390364
  0.64050000  -0.82390510
  0.64050000  -0.82390656
  0.64050000  -0.82390802
  0.64050000  -0.82390947
  0.64050000  -0.82391092
  0.64100000  -0.82386377
  0.64100000  -0.82386531
  0.64100000  -0.82386685
  0.64100000  -0.82386838
  0.64100000  -0.82386992
  0.64100000  -0.82387145
  0.64100000  -0.82387297
  0.64100000  -0.82387450
  0.64100000  -0.82387602
  0.64100000  -0.82387754
  0.64100000  -0.82387905
  0.64100000  -0.82388057
  0.64100000  -0.82388208
  0.64100000  -0.82388359
  0.64100000  -0.82388509
  0.64100000  -0.82388660
  0.64100000  -0.82388810
  0.64100000  -0.82388960
  0.64100000  -0.82389109
  0.64100000  -0.82389259
  0.64100000  -0.82389408
  0.64100000  -0.82389557
  0.64100000  -0.82389705
  0.64100000  -0.82389854
  0.64100000  -0.82390002
  0.64100000  -0.82390150
  0.64100000  -0.82390297
  0.64100000  -0.82390445
  0.64100000  -0.82390592
  0.64100000  -0.82390739
  0.64100000  -0.82390885
  0.64100000  -0.82391032
  0.64100000  -0.82391178
  0.64100000  -0.82391324
  0.64100000  -0.82391469
  0.64100000  -0.82391615
  0.64100000  -0.82391760
  0.64100000  -0.82391905
  0.64100000  -0.82392049
  0.64100000  -0.82392194
  0.64150000  -0.82387498
  0.64150000  -0.82387652
  0.64150000  -0.82387805
  0.64150000  -0.82387957
  0.64150000  -0.82388110
  0.64150000  -0.82388262
  0.64150000  -0.82388414
  0.64150000  -0.82388566
  0.64150000  -0.82388718
  0.64150000  -0.82388869
  0.64150000  -0.82389020
  0.64150000  -0.82389171
  0.64150000  -0.82389321
  0.64150000  -0.82389472
  0.64150000  -0.82389622
  0.64150000  -0.82389771
  0.64150000  -0.82389921
  0.64150000  -0.82390070
  0.64150000  -0.82390219
  0.64150000  -0.82390368
  0.64150000  -0.82390516
  0.64150000  -0.82390665
  0.64150000  -0.82390813
  0.64150000  -0.82390960
  0.64150000  -0.82391108
  0.64150000  -0.82391255
  0.64150000  -0.82391402
  0.64150000  -0.82391549
  0.64150000  -0.82391695
  0.64150000  -0.82391842
  0.64150000  -0.82391988
  0.64150000  -0.82392133
  0.64150000  -0.82392279
  0.64150000  -0.82392424
  0.64150000  -0.82392569
  0.64150000  -0.82392714
  0.64150000  -0.82392859
  0.64150000  -0.82393003
  0.64150000  -0.82393147
  0.64150000  -0.82393291
  0.64200000  -0.82388614
  0.64200000  -0.82388767
  0.64200000  -0.82388919
  0.64200000  -0.82389072
  0.64200000  -0.82389223
  0.64200000  -0.82389375
  0.64200000  -0.82389527
  0.64200000  -0.82389678
  0.64200000  -0.82389829
  0.64200000  -0.82389979
  0.64200000  -0.82390130
  0.64200000  -0.82390280
  0.64200000  -0.82390430
  0.64200000  -0.82390579
  0.64200000  -0.82390729
  0.64200000  -0.82390878
  0.64200000  -0.82391027
  0.64200000  -0.82391175
  0.64200000  -0.82391324
  0.64200000  -0.82391472
  0.64200000  -0.82391620
  0.64200000  -0.82391767
  0.64200000  -0.82391915
  0.64200000  -0.82392062
  0.64200000  -0.82392209
  0.64200000  -0.82392355
  0.64200000  -0.82392502
  0.64200000  -0.82392648
  0.64200000  -0.82392794
  0.64200000  -0.82392940
  0.64200000  -0.82393085
  0.64200000  -0.82393230
  0.64200000  -0.82393375
  0.64200000  -0.82393520
  0.64200000  -0.82393664
  0.64200000  -0.82393808
  0.64200000  -0.82393952
  0.64200000  -0.82394096
  0.64200000  -0.82394240
  0.64200000  -0.82394383
  0.64250000  -0.82389725
  0.64250000  -0.82389877
  0.64250000  -0.82390029
  0.64250000  -0.82390181
  0.64250000  -0.82390332
  0.64250000  -0.82390483
  0.64250000  -0.82390634
  0.64250000  -0.82390784
  0.64250000  -0.82390935
  0.64250000  -0.82391085
  0.64250000  -0.82391234
  0.64250000  -0.82391384
  0.64250000  -0.82391533
  0.64250000  -0.82391682
  0.64250000  -0.82391831
  0.64250000  -0.82391980
  0.64250000  -0.82392128
  0.64250000  -0.82392276
  0.64250000  -0.82392424
  0.64250000  -0.82392571
  0.64250000  -0.82392718
  0.64250000  -0.82392865
  0.64250000  -0.82393012
  0.64250000  -0.82393159
  0.64250000  -0.82393305
  0.64250000  -0.82393451
  0.64250000  -0.82393597
  0.64250000  -0.82393742
  0.64250000  -0.82393888
  0.64250000  -0.82394033
  0.64250000  -0.82394177
  0.64250000  -0.82394322
  0.64250000  -0.82394466
  0.64250000  -0.82394610
  0.64250000  -0.82394754
  0.64250000  -0.82394898
  0.64250000  -0.82395041
  0.64250000  -0.82395184
  0.64250000  -0.82395327
  0.64250000  -0.82395470
  0.64300000  -0.82390831
  0.64300000  -0.82390983
  0.64300000  -0.82391134
  0.64300000  -0.82391285
  0.64300000  -0.82391435
  0.64300000  -0.82391586
  0.64300000  -0.82391736
  0.64300000  -0.82391886
  0.64300000  -0.82392036
  0.64300000  -0.82392185
  0.64300000  -0.82392334
  0.64300000  -0.82392483
  0.64300000  -0.82392632
  0.64300000  -0.82392780
  0.64300000  -0.82392928
  0.64300000  -0.82393076
  0.64300000  -0.82393224
  0.64300000  -0.82393371
  0.64300000  -0.82393518
  0.64300000  -0.82393665
  0.64300000  -0.82393812
  0.64300000  -0.82393958
  0.64300000  -0.82394105
  0.64300000  -0.82394250
  0.64300000  -0.82394396
  0.64300000  -0.82394542
  0.64300000  -0.82394687
  0.64300000  -0.82394832
  0.64300000  -0.82394976
  0.64300000  -0.82395121
  0.64300000  -0.82395265
  0.64300000  -0.82395409
  0.64300000  -0.82395553
  0.64300000  -0.82395696
  0.64300000  -0.82395839
  0.64300000  -0.82395982
  0.64300000  -0.82396125
  0.64300000  -0.82396268
  0.64300000  -0.82396410
  0.64300000  -0.82396552
  0.64350000  -0.82391932
  0.64350000  -0.82392083
  0.64350000  -0.82392234
  0.64350000  -0.82392384
  0.64350000  -0.82392534
  0.64350000  -0.82392684
  0.64350000  -0.82392833
  0.64350000  -0.82392983
  0.64350000  -0.82393132
  0.64350000  -0.82393281
  0.64350000  -0.82393429
  0.64350000  -0.82393577
  0.64350000  -0.82393725
  0.64350000  -0.82393873
  0.64350000  -0.82394021
  0.64350000  -0.82394168
  0.64350000  -0.82394315
  0.64350000  -0.82394462
  0.64350000  -0.82394608
  0.64350000  -0.82394755
  0.64350000  -0.82394901
  0.64350000  -0.82395047
  0.64350000  -0.82395192
  0.64350000  -0.82395337
  0.64350000  -0.82395482
  0.64350000  -0.82395627
  0.64350000  -0.82395772
  0.64350000  -0.82395916
  0.64350000  -0.82396060
  0.64350000  -0.82396204
  0.64350000  -0.82396348
  0.64350000  -0.82396491
  0.64350000  -0.82396634
  0.64350000  -0.82396777
  0.64350000  -0.82396920
  0.64350000  -0.82397062
  0.64350000  -0.82397204
  0.64350000  -0.82397346
  0.64350000  -0.82397488
  0.64350000  -0.82397630
  0.64400000  -0.82393028
  0.64400000  -0.82393179
  0.64400000  -0.82393329
  0.64400000  -0.82393478
  0.64400000  -0.82393628
  0.64400000  -0.82393777
  0.64400000  -0.82393926
  0.64400000  -0.82394075
  0.64400000  -0.82394223
  0.64400000  -0.82394371
  0.64400000  -0.82394519
  0.64400000  -0.82394667
  0.64400000  -0.82394814
  0.64400000  -0.82394961
  0.64400000  -0.82395108
  0.64400000  -0.82395255
  0.64400000  -0.82395401
  0.64400000  -0.82395548
  0.64400000  -0.82395693
  0.64400000  -0.82395839
  0.64400000  -0.82395985
  0.64400000  -0.82396130
  0.64400000  -0.82396275
  0.64400000  -0.82396419
  0.64400000  -0.82396564
  0.64400000  -0.82396708
  0.64400000  -0.82396852
  0.64400000  -0.82396996
  0.64400000  -0.82397139
  0.64400000  -0.82397283
  0.64400000  -0.82397426
  0.64400000  -0.82397568
  0.64400000  -0.82397711
  0.64400000  -0.82397853
  0.64400000  -0.82397995
  0.64400000  -0.82398137
  0.64400000  -0.82398279
  0.64400000  -0.82398420
  0.64400000  -0.82398561
  0.64400000  -0.82398702
  0.64450000  -0.82394120
  0.64450000  -0.82394269
  0.64450000  -0.82394419
  0.64450000  -0.82394568
  0.64450000  -0.82394717
  0.64450000  -0.82394865
  0.64450000  -0.82395013
  0.64450000  -0.82395162
  0.64450000  -0.82395309
  0.64450000  -0.82395457
  0.64450000  -0.82395604
  0.64450000  -0.82395751
  0.64450000  -0.82395898
  0.64450000  -0.82396045
  0.64450000  -0.82396191
  0.64450000  -0.82396337
  0.64450000  -0.82396483
  0.64450000  -0.82396628
  0.64450000  -0.82396774
  0.64450000  -0.82396919
  0.64450000  -0.82397064
  0.64450000  -0.82397208
  0.64450000  -0.82397353
  0.64450000  -0.82397497
  0.64450000  -0.82397641
  0.64450000  -0.82397784
  0.64450000  -0.82397928
  0.64450000  -0.82398071
  0.64450000  -0.82398214
  0.64450000  -0.82398356
  0.64450000  -0.82398499
  0.64450000  -0.82398641
  0.64450000  -0.82398783
  0.64450000  -0.82398925
  0.64450000  -0.82399066
  0.64450000  -0.82399207
  0.64450000  -0.82399348
  0.64450000  -0.82399489
  0.64450000  -0.82399630
  0.64450000  -0.82399770
  0.64500000  -0.82395206
  0.64500000  -0.82395355
  0.64500000  -0.82395504
  0.64500000  -0.82395652
  0.64500000  -0.82395801
  0.64500000  -0.82395948
  0.64500000  -0.82396096
  0.64500000  -0.82396244
  0.64500000  -0.82396391
  0.64500000  -0.82396538
  0.64500000  -0.82396684
  0.64500000  -0.82396831
  0.64500000  -0.82396977
  0.64500000  -0.82397123
  0.64500000  -0.82397269
  0.64500000  -0.82397414
  0.64500000  -0.82397559
  0.64500000  -0.82397704
  0.64500000  -0.82397849
  0.64500000  -0.82397994
  0.64500000  -0.82398138
  0.64500000  -0.82398282
  0.64500000  -0.82398426
  0.64500000  -0.82398569
  0.64500000  -0.82398712
  0.64500000  -0.82398855
  0.64500000  -0.82398998
  0.64500000  -0.82399141
  0.64500000  -0.82399283
  0.64500000  -0.82399425
  0.64500000  -0.82399567
  0.64500000  -0.82399709
  0.64500000  -0.82399850
  0.64500000  -0.82399991
  0.64500000  -0.82400132
  0.64500000  -0.82400273
  0.64500000  -0.82400413
  0.64500000  -0.82400553
  0.64500000  -0.82400693
  0.64500000  -0.82400833
  0.64550000  -0.82396288
  0.64550000  -0.82396436
  0.64550000  -0.82396584
  0.64550000  -0.82396732
  0.64550000  -0.82396880
  0.64550000  -0.82397027
  0.64550000  -0.82397174
  0.64550000  -0.82397321
  0.64550000  -0.82397467
  0.64550000  -0.82397614
  0.64550000  -0.82397760
  0.64550000  -0.82397906
  0.64550000  -0.82398051
  0.64550000  -0.82398197
  0.64550000  -0.82398342
  0.64550000  -0.82398487
  0.64550000  -0.82398631
  0.64550000  -0.82398776
  0.64550000  -0.82398920
  0.64550000  -0.82399064
  0.64550000  -0.82399207
  0.64550000  -0.82399351
  0.64550000  -0.82399494
  0.64550000  -0.82399637
  0.64550000  -0.82399779
  0.64550000  -0.82399922
  0.64550000  -0.82400064
  0.64550000  -0.82400206
  0.64550000  -0.82400348
  0.64550000  -0.82400489
  0.64550000  -0.82400630
  0.64550000  -0.82400771
  0.64550000  -0.82400912
  0.64550000  -0.82401053
  0.64550000  -0.82401193
  0.64550000  -0.82401333
  0.64550000  -0.82401473
  0.64550000  -0.82401612
  0.64550000  -0.82401752
  0.64550000  -0.82401891
  0.64600000  -0.82397364
  0.64600000  -0.82397512
  0.64600000  -0.82397660
  0.64600000  -0.82397807
  0.64600000  -0.82397954
  0.64600000  -0.82398101
  0.64600000  -0.82398247
  0.64600000  -0.82398393
  0.64600000  -0.82398539
  0.64600000  -0.82398685
  0.64600000  -0.82398831
  0.64600000  -0.82398976
  0.64600000  -0.82399121
  0.64600000  -0.82399266
  0.64600000  -0.82399410
  0.64600000  -0.82399554
  0.64600000  -0.82399698
  0.64600000  -0.82399842
  0.64600000  -0.82399986
  0.64600000  -0.82400129
  0.64600000  -0.82400272
  0.64600000  -0.82400415
  0.64600000  -0.82400557
  0.64600000  -0.82400700
  0.64600000  -0.82400842
  0.64600000  -0.82400983
  0.64600000  -0.82401125
  0.64600000  -0.82401266
  0.64600000  -0.82401408
  0.64600000  -0.82401548
  0.64600000  -0.82401689
  0.64600000  -0.82401829
  0.64600000  -0.82401970
  0.64600000  -0.82402110
  0.64600000  -0.82402249
  0.64600000  -0.82402389
  0.64600000  -0.82402528
  0.64600000  -0.82402667
  0.64600000  -0.82402806
  0.64600000  -0.82402944
  0.64650000  -0.82398436
  0.64650000  -0.82398583
  0.64650000  -0.82398730
  0.64650000  -0.82398877
  0.64650000  -0.82399023
  0.64650000  -0.82399170
  0.64650000  -0.82399315
  0.64650000  -0.82399461
  0.64650000  -0.82399606
  0.64650000  -0.82399752
  0.64650000  -0.82399896
  0.64650000  -0.82400041
  0.64650000  -0.82400185
  0.64650000  -0.82400330
  0.64650000  -0.82400473
  0.64650000  -0.82400617
  0.64650000  -0.82400761
  0.64650000  -0.82400904
  0.64650000  -0.82401047
  0.64650000  -0.82401189
  0.64650000  -0.82401332
  0.64650000  -0.82401474
  0.64650000  -0.82401616
  0.64650000  -0.82401758
  0.64650000  -0.82401899
  0.64650000  -0.82402040
  0.64650000  -0.82402181
  0.64650000  -0.82402322
  0.64650000  -0.82402463
  0.64650000  -0.82402603
  0.64650000  -0.82402743
  0.64650000  -0.82402883
  0.64650000  -0.82403022
  0.64650000  -0.82403162
  0.64650000  -0.82403301
  0.64650000  -0.82403440
  0.64650000  -0.82403579
  0.64650000  -0.82403717
  0.64650000  -0.82403855
  0.64650000  -0.82403993
  0.64700000  -0.82399504
  0.64700000  -0.82399650
  0.64700000  -0.82399796
  0.64700000  -0.82399942
  0.64700000  -0.82400088
  0.64700000  -0.82400234
  0.64700000  -0.82400379
  0.64700000  -0.82400524
  0.64700000  -0.82400669
  0.64700000  -0.82400813
  0.64700000  -0.82400957
  0.64700000  -0.82401101
  0.64700000  -0.82401245
  0.64700000  -0.82401389
  0.64700000  -0.82401532
  0.64700000  -0.82401675
  0.64700000  -0.82401818
  0.64700000  -0.82401961
  0.64700000  -0.82402103
  0.64700000  -0.82402245
  0.64700000  -0.82402387
  0.64700000  -0.82402528
  0.64700000  -0.82402670
  0.64700000  -0.82402811
  0.64700000  -0.82402952
  0.64700000  -0.82403092
  0.64700000  -0.82403233
  0.64700000  -0.82403373
  0.64700000  -0.82403513
  0.64700000  -0.82403653
  0.64700000  -0.82403792
  0.64700000  -0.82403931
  0.64700000  -0.82404070
  0.64700000  -0.82404209
  0.64700000  -0.82404348
  0.64700000  -0.82404486
  0.64700000  -0.82404624
  0.64700000  -0.82404762
  0.64700000  -0.82404900
  0.64700000  -0.82405037
  0.64750000  -0.82400566
  0.64750000  -0.82400712
  0.64750000  -0.82400857
  0.64750000  -0.82401003
  0.64750000  -0.82401148
  0.64750000  -0.82401293
  0.64750000  -0.82401438
  0.64750000  -0.82401582
  0.64750000  -0.82401726
  0.64750000  -0.82401870
  0.64750000  -0.82402014
  0.64750000  -0.82402157
  0.64750000  -0.82402300
  0.64750000  -0.82402443
  0.64750000  -0.82402586
  0.64750000  -0.82402729
  0.64750000  -0.82402871
  0.64750000  -0.82403013
  0.64750000  -0.82403154
  0.64750000  -0.82403296
  0.64750000  -0.82403437
  0.64750000  -0.82403578
  0.64750000  -0.82403719
  0.64750000  -0.82403860
  0.64750000  -0.82404000
  0.64750000  -0.82404140
  0.64750000  -0.82404280
  0.64750000  -0.82404419
  0.64750000  -0.82404559
  0.64750000  -0.82404698
  0.64750000  -0.82404837
  0.64750000  -0.82404975
  0.64750000  -0.82405114
  0.64750000  -0.82405252
  0.64750000  -0.82405390
  0.64750000  -0.82405528
  0.64750000  -0.82405665
  0.64750000  -0.82405803
  0.64750000  -0.82405940
  0.64750000  -0.82406076
  0.64800000  -0.82401624
  0.64800000  -0.82401769
  0.64800000  -0.82401914
  0.64800000  -0.82402059
  0.64800000  -0.82402203
  0.64800000  -0.82402348
  0.64800000  -0.82402492
  0.64800000  -0.82402635
  0.64800000  -0.82402779
  0.64800000  -0.82402922
  0.64800000  -0.82403065
  0.64800000  -0.82403208
  0.64800000  -0.82403351
  0.64800000  -0.82403493
  0.64800000  -0.82403635
  0.64800000  -0.82403777
  0.64800000  -0.82403919
  0.64800000  -0.82404060
  0.64800000  -0.82404201
  0.64800000  -0.82404342
  0.64800000  -0.82404483
  0.64800000  -0.82404623
  0.64800000  -0.82404763
  0.64800000  -0.82404903
  0.64800000  -0.82405043
  0.64800000  -0.82405183
  0.64800000  -0.82405322
  0.64800000  -0.82405461
  0.64800000  -0.82405600
  0.64800000  -0.82405738
  0.64800000  -0.82405877
  0.64800000  -0.82406015
  0.64800000  -0.82406153
  0.64800000  -0.82406290
  0.64800000  -0.82406428
  0.64800000  -0.82406565
  0.64800000  -0.82406702
  0.64800000  -0.82406838
  0.64800000  -0.82406975
  0.64800000  -0.82407111
  0.64850000  -0.82402676
  0.64850000  -0.82402821
  0.64850000  -0.82402966
  0.64850000  -0.82403110
  0.64850000  -0.82403254
  0.64850000  -0.82403397
  0.64850000  -0.82403541
  0.64850000  -0.82403684
  0.64850000  -0.82403827
  0.64850000  -0.82403970
  0.64850000  -0.82404112
  0.64850000  -0.82404255
  0.64850000  -0.82404397
  0.64850000  -0.82404538
  0.64850000  -0.82404680
  0.64850000  -0.82404821
  0.64850000  -0.82404962
  0.64850000  -0.82405103
  0.64850000  -0.82405243
  0.64850000  -0.82405384
  0.64850000  -0.82405524
  0.64850000  -0.82405664
  0.64850000  -0.82405803
  0.64850000  -0.82405943
  0.64850000  -0.82406082
  0.64850000  -0.82406221
  0.64850000  -0.82406359
  0.64850000  -0.82406498
  0.64850000  -0.82406636
  0.64850000  -0.82406774
  0.64850000  -0.82406912
  0.64850000  -0.82407049
  0.64850000  -0.82407187
  0.64850000  -0.82407324
  0.64850000  -0.82407460
  0.64850000  -0.82407597
  0.64850000  -0.82407733
  0.64850000  -0.82407870
  0.64850000  -0.82408005
  0.64850000  -0.82408141
  0.64900000  -0.82403725
  0.64900000  -0.82403869
  0.64900000  -0.82404013
  0.64900000  -0.82404156
  0.64900000  -0.82404300
  0.64900000  -0.82404443
  0.64900000  -0.82404585
  0.64900000  -0.82404728
  0.64900000  -0.82404870
  0.64900000  -0.82405013
  0.64900000  -0.82405154
  0.64900000  -0.82405296
  0.64900000  -0.82405438
  0.64900000  -0.82405579
  0.64900000  -0.82405720
  0.64900000  -0.82405860
  0.64900000  -0.82406001
  0.64900000  -0.82406141
  0.64900000  -0.82406281
  0.64900000  -0.82406421
  0.64900000  -0.82406560
  0.64900000  -0.82406699
  0.64900000  -0.82406838
  0.64900000  -0.82406977
  0.64900000  -0.82407116
  0.64900000  -0.82407254
  0.64900000  -0.82407392
  0.64900000  -0.82407530
  0.64900000  -0.82407668
  0.64900000  -0.82407805
  0.64900000  -0.82407942
  0.64900000  -0.82408079
  0.64900000  -0.82408216
  0.64900000  -0.82408352
  0.64900000  -0.82408489
  0.64900000  -0.82408625
  0.64900000  -0.82408760
  0.64900000  -0.82408896
  0.64900000  -0.82409031
  0.64900000  -0.82409166
  0.64950000  -0.82404768
  0.64950000  -0.82404912
  0.64950000  -0.82405055
  0.64950000  -0.82405198
  0.64950000  -0.82405341
  0.64950000  -0.82405483
  0.64950000  -0.82405625
  0.64950000  -0.82405767
  0.64950000  -0.82405909
  0.64950000  -0.82406051
  0.64950000  -0.82406192
  0.64950000  -0.82406333
  0.64950000  -0.82406474
  0.64950000  -0.82406614
  0.64950000  -0.82406755
  0.64950000  -0.82406895
  0.64950000  -0.82407035
  0.64950000  -0.82407174
  0.64950000  -0.82407314
  0.64950000  -0.82407453
  0.64950000  -0.82407592
  0.64950000  -0.82407731
  0.64950000  -0.82407869
  0.64950000  -0.82408007
  0.64950000  -0.82408145
  0.64950000  -0.82408283
  0.64950000  -0.82408420
  0.64950000  -0.82408558
  0.64950000  -0.82408695
  0.64950000  -0.82408832
  0.64950000  -0.82408968
  0.64950000  -0.82409105
  0.64950000  -0.82409241
  0.64950000  -0.82409377
  0.64950000  -0.82409512
  0.64950000  -0.82409648
  0.64950000  -0.82409783
  0.64950000  -0.82409918
  0.64950000  -0.82410053
  0.64950000  -0.82410187
  0.65000000  -0.82405807
  0.65000000  -0.82405950
  0.65000000  -0.82406092
  0.65000000  -0.82406235
  0.65000000  -0.82406377
  0.65000000  -0.82406519
  0.65000000  -0.82406661
  0.65000000  -0.82406802
  0.65000000  -0.82406943
  0.65000000  -0.82407084
  0.65000000  -0.82407225
  0.65000000  -0.82407365
  0.65000000  -0.82407506
  0.65000000  -0.82407646
  0.65000000  -0.82407785
  0.65000000  -0.82407925
  0.65000000  -0.82408064
  0.65000000  -0.82408203
  0.65000000  -0.82408342
  0.65000000  -0.82408481
  0.65000000  -0.82408619
  0.65000000  -0.82408757
  0.65000000  -0.82408895
  0.65000000  -0.82409032
  0.65000000  -0.82409170
  0.65000000  -0.82409307
  0.65000000  -0.82409444
  0.65000000  -0.82409581
  0.65000000  -0.82409717
  0.65000000  -0.82409853
  0.65000000  -0.82409989
  0.65000000  -0.82410125
  0.65000000  -0.82410261
  0.65000000  -0.82410396
  0.65000000  -0.82410531
  0.65000000  -0.82410666
  0.65000000  -0.82410801
  0.65000000  -0.82410935
  0.65000000  -0.82411069
  0.65000000  -0.82411203
  0.65050000  -0.82406841
  0.65050000  -0.82406983
  0.65050000  -0.82407125
  0.65050000  -0.82407267
  0.65050000  -0.82407409
  0.65050000  -0.82407550
  0.65050000  -0.82407691
  0.65050000  -0.82407832
  0.65050000  -0.82407973
  0.65050000  -0.82408113
  0.65050000  -0.82408253
  0.65050000  -0.82408393
  0.65050000  -0.82408533
  0.65050000  -0.82408672
  0.65050000  -0.82408811
  0.65050000  -0.82408950
  0.65050000  -0.82409089
  0.65050000  -0.82409227
  0.65050000  -0.82409366
  0.65050000  -0.82409504
  0.65050000  -0.82409641
  0.65050000  -0.82409779
  0.65050000  -0.82409916
  0.65050000  -0.82410053
  0.65050000  -0.82410190
  0.65050000  -0.82410327
  0.65050000  -0.82410463
  0.65050000  -0.82410599
  0.65050000  -0.82410735
  0.65050000  -0.82410871
  0.65050000  -0.82411006
  0.65050000  -0.82411141
  0.65050000  -0.82411276
  0.65050000  -0.82411411
  0.65050000  -0.82411546
  0.65050000  -0.82411680
  0.65050000  -0.82411814
  0.65050000  -0.82411948
  0.65050000  -0.82412082
  0.65050000  -0.82412215
  0.65100000  -0.82407871
  0.65100000  -0.82408012
  0.65100000  -0.82408154
  0.65100000  -0.82408295
  0.65100000  -0.82408436
  0.65100000  -0.82408577
  0.65100000  -0.82408717
  0.65100000  -0.82408858
  0.65100000  -0.82408998
  0.65100000  -0.82409137
  0.65100000  -0.82409277
  0.65100000  -0.82409416
  0.65100000  -0.82409555
  0.65100000  -0.82409694
  0.65100000  -0.82409833
  0.65100000  -0.82409971
  0.65100000  -0.82410109
  0.65100000  -0.82410247
  0.65100000  -0.82410385
  0.65100000  -0.82410522
  0.65100000  -0.82410659
  0.65100000  -0.82410796
  0.65100000  -0.82410933
  0.65100000  -0.82411069
  0.65100000  -0.82411206
  0.65100000  -0.82411342
  0.65100000  -0.82411477
  0.65100000  -0.82411613
  0.65100000  -0.82411748
  0.65100000  -0.82411883
  0.65100000  -0.82412018
  0.65100000  -0.82412153
  0.65100000  -0.82412287
  0.65100000  -0.82412422
  0.65100000  -0.82412556
  0.65100000  -0.82412689
  0.65100000  -0.82412823
  0.65100000  -0.82412956
  0.65100000  -0.82413089
  0.65100000  -0.82413222
  0.65150000  -0.82408896
  0.65150000  -0.82409037
  0.65150000  -0.82409178
  0.65150000  -0.82409318
  0.65150000  -0.82409459
  0.65150000  -0.82409599
  0.65150000  -0.82409739
  0.65150000  -0.82409878
  0.65150000  -0.82410018
  0.65150000  -0.82410157
  0.65150000  -0.82410296
  0.65150000  -0.82410435
  0.65150000  -0.82410573
  0.65150000  -0.82410711
  0.65150000  -0.82410849
  0.65150000  -0.82410987
  0.65150000  -0.82411125
  0.65150000  -0.82411262
  0.65150000  -0.82411399
  0.65150000  -0.82411536
  0.65150000  -0.82411672
  0.65150000  -0.82411809
  0.65150000  -0.82411945
  0.65150000  -0.82412081
  0.65150000  -0.82412217
  0.65150000  -0.82412352
  0.65150000  -0.82412487
  0.65150000  -0.82412622
  0.65150000  -0.82412757
  0.65150000  -0.82412892
  0.65150000  -0.82413026
  0.65150000  -0.82413160
  0.65150000  -0.82413294
  0.65150000  -0.82413427
  0.65150000  -0.82413561
  0.65150000  -0.82413694
  0.65150000  -0.82413827
  0.65150000  -0.82413960
  0.65150000  -0.82414092
  0.65150000  -0.82414225
  0.65200000  -0.82409916
  0.65200000  -0.82410056
  0.65200000  -0.82410197
  0.65200000  -0.82410337
  0.65200000  -0.82410477
  0.65200000  -0.82410616
  0.65200000  -0.82410755
  0.65200000  -0.82410895
  0.65200000  -0.82411033
  0.65200000  -0.82411172
  0.65200000  -0.82411310
  0.65200000  -0.82411449
  0.65200000  -0.82411586
  0.65200000  -0.82411724
  0.65200000  -0.82411862
  0.65200000  -0.82411999
  0.65200000  -0.82412136
  0.65200000  -0.82412272
  0.65200000  -0.82412409
  0.65200000  -0.82412545
  0.65200000  -0.82412681
  0.65200000  -0.82412817
  0.65200000  -0.82412953
  0.65200000  -0.82413088
  0.65200000  -0.82413223
  0.65200000  -0.82413358
  0.65200000  -0.82413493
  0.65200000  -0.82413627
  0.65200000  -0.82413761
  0.65200000  -0.82413895
  0.65200000  -0.82414029
  0.65200000  -0.82414162
  0.65200000  -0.82414296
  0.65200000  -0.82414429
  0.65200000  -0.82414562
  0.65200000  -0.82414694
  0.65200000  -0.82414827
  0.65200000  -0.82414959
  0.65200000  -0.82415091
  0.65200000  -0.82415223
  0.65250000  -0.82410932
  0.65250000  -0.82411072
  0.65250000  -0.82411211
  0.65250000  -0.82411351
  0.65250000  -0.82411490
  0.65250000  -0.82411629
  0.65250000  -0.82411768
  0.65250000  -0.82411906
  0.65250000  -0.82412045
  0.65250000  -0.82412183
  0.65250000  -0.82412320
  0.65250000  -0.82412458
  0.65250000  -0.82412595
  0.65250000  -0.82412732
  0.65250000  -0.82412869
  0.65250000  -0.82413006
  0.65250000  -0.82413142
  0.65250000  -0.82413278
  0.65250000  -0.82413414
  0.65250000  -0.82413550
  0.65250000  -0.82413685
  0.65250000  -0.82413821
  0.65250000  -0.82413956
  0.65250000  -0.82414090
  0.65250000  -0.82414225
  0.65250000  -0.82414359
  0.65250000  -0.82414493
  0.65250000  -0.82414627
  0.65250000  -0.82414761
  0.65250000  -0.82414894
  0.65250000  -0.82415027
  0.65250000  -0.82415160
  0.65250000  -0.82415293
  0.65250000  -0.82415426
  0.65250000  -0.82415558
  0.65250000  -0.82415690
  0.65250000  -0.82415822
  0.65250000  -0.82415954
  0.65250000  -0.82416085
  0.65250000  -0.82416216
  0.65300000  -0.82411943
  0.65300000  -0.82412082
  0.65300000  -0.82412221
  0.65300000  -0.82412360
  0.65300000  -0.82412499
  0.65300000  -0.82412637
  0.65300000  -0.82412775
  0.65300000  -0.82412913
  0.65300000  -0.82413051
  0.65300000  -0.82413189
  0.65300000  -0.82413326
  0.65300000  -0.82413463
  0.65300000  -0.82413599
  0.65300000  -0.82413736
  0.65300000  -0.82413872
  0.65300000  -0.82414008
  0.65300000  -0.82414144
  0.65300000  -0.82414280
  0.65300000  -0.82414415
  0.65300000  -0.82414550
  0.65300000  -0.82414685
  0.65300000  -0.82414820
  0.65300000  -0.82414954
  0.65300000  -0.82415088
  0.65300000  -0.82415222
  0.65300000  -0.82415356
  0.65300000  -0.82415490
  0.65300000  -0.82415623
  0.65300000  -0.82415756
  0.65300000  -0.82415889
  0.65300000  -0.82416021
  0.65300000  -0.82416154
  0.65300000  -0.82416286
  0.65300000  -0.82416418
  0.65300000  -0.82416550
  0.65300000  -0.82416681
  0.65300000  -0.82416813
  0.65300000  -0.82416944
  0.65300000  -0.82417075
  0.65300000  -0.82417205
  0.65350000  -0.82412950
  0.65350000  -0.82413088
  0.65350000  -0.82413227
  0.65350000  -0.82413365
  0.65350000  -0.82413503
  0.65350000  -0.82413641
  0.65350000  -0.82413779
  0.65350000  -0.82413916
  0.65350000  -0.82414053
  0.65350000  -0.82414190
  0.65350000  -0.82414327
  0.65350000  -0.82414463
  0.65350000  -0.82414599
  0.65350000  -0.82414735
  0.65350000  -0.82414871
  0.65350000  -0.82415006
  0.65350000  -0.82415142
  0.65350000  -0.82415277
  0.65350000  -0.82415411
  0.65350000  -0.82415546
  0.65350000  -0.82415680
  0.65350000  -0.82415814
  0.65350000  -0.82415948
  0.65350000  -0.82416082
  0.65350000  -0.82416215
  0.65350000  -0.82416348
  0.65350000  -0.82416481
  0.65350000  -0.82416614
  0.65350000  -0.82416747
  0.65350000  -0.82416879
  0.65350000  -0.82417011
  0.65350000  -0.82417143
  0.65350000  -0.82417275
  0.65350000  -0.82417406
  0.65350000  -0.82417537
  0.65350000  -0.82417668
  0.65350000  -0.82417799
  0.65350000  -0.82417929
  0.65350000  -0.82418060
  0.65350000  -0.82418190
  0.65400000  -0.82413952
  0.65400000  -0.82414090
  0.65400000  -0.82414228
  0.65400000  -0.82414366
  0.65400000  -0.82414503
  0.65400000  -0.82414640
  0.65400000  -0.82414777
  0.65400000  -0.82414914
  0.65400000  -0.82415051
  0.65400000  -0.82415187
  0.65400000  -0.82415323
  0.65400000  -0.82415459
  0.65400000  -0.82415594
  0.65400000  -0.82415730
  0.65400000  -0.82415865
  0.65400000  -0.82416000
  0.65400000  -0.82416135
  0.65400000  -0.82416269
  0.65400000  -0.82416403
  0.65400000  -0.82416537
  0.65400000  -0.82416671
  0.65400000  -0.82416805
  0.65400000  -0.82416938
  0.65400000  -0.82417071
  0.65400000  -0.82417204
  0.65400000  -0.82417336
  0.65400000  -0.82417469
  0.65400000  -0.82417601
  0.65400000  -0.82417733
  0.65400000  -0.82417865
  0.65400000  -0.82417996
  0.65400000  -0.82418128
  0.65400000  -0.82418259
  0.65400000  -0.82418389
  0.65400000  -0.82418520
  0.65400000  -0.82418651
  0.65400000  -0.82418781
  0.65400000  -0.82418911
  0.65400000  -0.82419040
  0.65400000  -0.82419170
  0.65450000  -0.82414950
  0.65450000  -0.82415087
  0.65450000  -0.82415225
  0.65450000  -0.82415362
  0.65450000  -0.82415499
  0.65450000  -0.82415635
  0.65450000  -0.82415772
  0.65450000  -0.82415908
  0.65450000  -0.82416044
  0.65450000  -0.82416180
  0.65450000  -0.82416315
  0.65450000  -0.82416450
  0.65450000  -0.82416585
  0.65450000  -0.82416720
  0.65450000  -0.82416855
  0.65450000  -0.82416989
  0.65450000  -0.82417123
  0.65450000  -0.82417257
  0.65450000  -0.82417391
  0.65450000  -0.82417524
  0.65450000  -0.82417657
  0.65450000  -0.82417790
  0.65450000  -0.82417923
  0.65450000  -0.82418055
  0.65450000  -0.82418188
  0.65450000  -0.82418320
  0.65450000  -0.82418452
  0.65450000  -0.82418583
  0.65450000  -0.82418715
  0.65450000  -0.82418846
  0.65450000  -0.82418977
  0.65450000  -0.82419108
  0.65450000  -0.82419238
  0.65450000  -0.82419368
  0.65450000  -0.82419499
  0.65450000  -0.82419628
  0.65450000  -0.82419758
  0.65450000  -0.82419888
  0.65450000  -0.82420017
  0.65450000  -0.82420146
  0.65500000  -0.82415943
  0.65500000  -0.82416080
  0.65500000  -0.82416217
  0.65500000  -0.82416353
  0.65500000  -0.82416489
  0.65500000  -0.82416626
  0.65500000  -0.82416761
  0.65500000  -0.82416897
  0.65500000  -0.82417032
  0.65500000  -0.82417168
  0.65500000  -0.82417302
  0.65500000  -0.82417437
  0.65500000  -0.82417572
  0.65500000  -0.82417706
  0.65500000  -0.82417840
  0.65500000  -0.82417974
  0.65500000  -0.82418107
  0.65500000  -0.82418240
  0.65500000  -0.82418374
  0.65500000  -0.82418506
  0.65500000  -0.82418639
  0.65500000  -0.82418771
  0.65500000  -0.82418904
  0.65500000  -0.82419036
  0.65500000  -0.82419167
  0.65500000  -0.82419299
  0.65500000  -0.82419430
  0.65500000  -0.82419561
  0.65500000  -0.82419692
  0.65500000  -0.82419823
  0.65500000  -0.82419953
  0.65500000  -0.82420083
  0.65500000  -0.82420213
  0.65500000  -0.82420343
  0.65500000  -0.82420473
  0.65500000  -0.82420602
  0.65500000  -0.82420731
  0.65500000  -0.82420860
  0.65500000  -0.82420989
  0.65500000  -0.82421117
  0.65550000  -0.82416932
  0.65550000  -0.82417068
  0.65550000  -0.82417204
  0.65550000  -0.82417340
  0.65550000  -0.82417476
  0.65550000  -0.82417611
  0.65550000  -0.82417747
  0.65550000  -0.82417882
  0.65550000  -0.82418017
  0.65550000  -0.82418151
  0.65550000  -0.82418286
  0.65550000  -0.82418420
  0.65550000  -0.82418554
  0.65550000  -0.82418687
  0.65550000  -0.82418821
  0.65550000  -0.82418954
  0.65550000  -0.82419087
  0.65550000  -0.82419220
  0.65550000  -0.82419352
  0.65550000  -0.82419484
  0.65550000  -0.82419617
  0.65550000  -0.82419748
  0.65550000  -0.82419880
  0.65550000  -0.82420011
  0.65550000  -0.82420143
  0.65550000  -0.82420274
  0.65550000  -0.82420404
  0.65550000  -0.82420535
  0.65550000  -0.82420665
  0.65550000  -0.82420795
  0.65550000  -0.82420925
  0.65550000  -0.82421055
  0.65550000  -0.82421184
  0.65550000  -0.82421313
  0.65550000  -0.82421442
  0.65550000  -0.82421571
  0.65550000  -0.82421700
  0.65550000  -0.82421828
  0.65550000  -0.82421956
  0.65550000  -0.82422084
  0.65600000  -0.82417916
  0.65600000  -0.82418052
  0.65600000  -0.82418187
  0.65600000  -0.82418323
  0.65600000  -0.82418458
  0.65600000  -0.82418593
  0.65600000  -0.82418728
  0.65600000  -0.82418862
  0.65600000  -0.82418996
  0.65600000  -0.82419130
  0.65600000  -0.82419264
  0.65600000  -0.82419398
  0.65600000  -0.82419531
  0.65600000  -0.82419664
  0.65600000  -0.82419797
  0.65600000  -0.82419930
  0.65600000  -0.82420062
  0.65600000  -0.82420194
  0.65600000  -0.82420326
  0.65600000  -0.82420458
  0.65600000  -0.82420590
  0.65600000  -0.82420721
  0.65600000  -0.82420852
  0.65600000  -0.82420983
  0.65600000  -0.82421113
  0.65600000  -0.82421244
  0.65600000  -0.82421374
  0.65600000  -0.82421504
  0.65600000  -0.82421634
  0.65600000  -0.82421763
  0.65600000  -0.82421893
  0.65600000  -0.82422022
  0.65600000  -0.82422151
  0.65600000  -0.82422279
  0.65600000  -0.82422408
  0.65600000  -0.82422536
  0.65600000  -0.82422664
  0.65600000  -0.82422792
  0.65600000  -0.82422919
  0.65600000  -0.82423047
  0.65650000  -0.82418896
  0.65650000  -0.82419031
  0.65650000  -0.82419166
  0.65650000  -0.82419301
  0.65650000  -0.82419436
  0.65650000  -0.82419570
  0.65650000  -0.82419704
  0.65650000  -0.82419838
  0.65650000  -0.82419972
  0.65650000  -0.82420105
  0.65650000  -0.82420238
  0.65650000  -0.82420371
  0.65650000  -0.82420504
  0.65650000  -0.82420637
  0.65650000  -0.82420769
  0.65650000  -0.82420901
  0.65650000  -0.82421033
  0.65650000  -0.82421165
  0.65650000  -0.82421296
  0.65650000  -0.82421427
  0.65650000  -0.82421558
  0.65650000  -0.82421689
  0.65650000  -0.82421819
  0.65650000  -0.82421950
  0.65650000  -0.82422080
  0.65650000  -0.82422210
  0.65650000  -0.82422339
  0.65650000  -0.82422469
  0.65650000  -0.82422598
  0.65650000  -0.82422727
  0.65650000  -0.82422856
  0.65650000  -0.82422984
  0.65650000  -0.82423113
  0.65650000  -0.82423241
  0.65650000  -0.82423369
  0.65650000  -0.82423496
  0.65650000  -0.82423624
  0.65650000  -0.82423751
  0.65650000  -0.82423878
  0.65650000  -0.82424005
  0.65700000  -0.82419871
  0.65700000  -0.82420006
  0.65700000  -0.82420140
  0.65700000  -0.82420275
  0.65700000  -0.82420409
  0.65700000  -0.82420543
  0.65700000  -0.82420676
  0.65700000  -0.82420810
  0.65700000  -0.82420943
  0.65700000  -0.82421076
  0.65700000  -0.82421208
  0.65700000  -0.82421341
  0.65700000  -0.82421473
  0.65700000  -0.82421605
  0.65700000  -0.82421737
  0.65700000  -0.82421868
  0.65700000  -0.82421999
  0.65700000  -0.82422131
  0.65700000  -0.82422261
  0.65700000  -0.82422392
  0.65700000  -0.82422522
  0.65700000  -0.82422653
  0.65700000  -0.82422783
  0.65700000  -0.82422912
  0.65700000  -0.82423042
  0.65700000  -0.82423171
  0.65700000  -0.82423300
  0.65700000  -0.82423429
  0.65700000  -0.82423558
  0.65700000  -0.82423686
  0.65700000  -0.82423815
  0.65700000  -0.82423943
  0.65700000  -0.82424070
  0.65700000  -0.82424198
  0.65700000  -0.82424325
  0.65700000  -0.82424452
  0.65700000  -0.82424579
  0.65700000  -0.82424706
  0.65700000  -0.82424833
  0.65700000  -0.82424959
  0.65750000  -0.82420842
  0.65750000  -0.82420977
  0.65750000  -0.82421110
  0.65750000  -0.82421244
  0.65750000  -0.82421378
  0.65750000  -0.82421511
  0.65750000  -0.82421644
  0.65750000  -0.82421777
  0.65750000  -0.82421909
  0.65750000  -0.82422042
  0.65750000  -0.82422174
  0.65750000  -0.82422306
  0.65750000  -0.82422437
  0.65750000  -0.82422569
  0.65750000  -0.82422700
  0.65750000  -0.82422831
  0.65750000  -0.82422962
  0.65750000  -0.82423092
  0.65750000  -0.82423222
  0.65750000  -0.82423353
  0.65750000  -0.82423482
  0.65750000  -0.82423612
  0.65750000  -0.82423741
  0.65750000  -0.82423871
  0.65750000  -0.82424000
  0.65750000  -0.82424128
  0.65750000  -0.82424257
  0.65750000  -0.82424385
  0.65750000  -0.82424513
  0.65750000  -0.82424641
  0.65750000  -0.82424769
  0.65750000  -0.82424897
  0.65750000  -0.82425024
  0.65750000  -0.82425151
  0.65750000  -0.82425278
  0.65750000  -0.82425404
  0.65750000  -0.82425531
  0.65750000  -0.82425657
  0.65750000  -0.82425783
  0.65750000  -0.82425909
  0.65800000  -0.82421809
  0.65800000  -0.82421943
  0.65800000  -0.82422076
  0.65800000  -0.82422209
  0.65800000  -0.82422342
  0.65800000  -0.82422475
  0.65800000  -0.82422607
  0.65800000  -0.82422740
  0.65800000  -0.82422872
  0.65800000  -0.82423003
  0.65800000  -0.82423135
  0.65800000  -0.82423266
  0.65800000  -0.82423397
  0.65800000  -0.82423528
  0.65800000  -0.82423659
  0.65800000  -0.82423789
  0.65800000  -0.82423919
  0.65800000  -0.82424049
  0.65800000  -0.82424179
  0.65800000  -0.82424309
  0.65800000  -0.82424438
  0.65800000  -0.82424567
  0.65800000  -0.82424696
  0.65800000  -0.82424825
  0.65800000  -0.82424953
  0.65800000  -0.82425081
  0.65800000  -0.82425209
  0.65800000  -0.82425337
  0.65800000  -0.82425465
  0.65800000  -0.82425592
  0.65800000  -0.82425719
  0.65800000  -0.82425846
  0.65800000  -0.82425973
  0.65800000  -0.82426099
  0.65800000  -0.82426226
  0.65800000  -0.82426352
  0.65800000  -0.82426478
  0.65800000  -0.82426603
  0.65800000  -0.82426729
  0.65800000  -0.82426854
  0.65850000  -0.82422772
  0.65850000  -0.82422905
  0.65850000  -0.82423037
  0.65850000  -0.82423170
  0.65850000  -0.82423302
  0.65850000  -0.82423434
  0.65850000  -0.82423566
  0.65850000  -0.82423698
  0.65850000  -0.82423829
  0.65850000  -0.82423961
  0.65850000  -0.82424092
  0.65850000  -0.82424222
  0.65850000  -0.82424353
  0.65850000  -0.82424483
  0.65850000  -0.82424613
  0.65850000  -0.82424743
  0.65850000  -0.82424873
  0.65850000  -0.82425002
  0.65850000  -0.82425132
  0.65850000  -0.82425261
  0.65850000  -0.82425389
  0.65850000  -0.82425518
  0.65850000  -0.82425646
  0.65850000  -0.82425774
  0.65850000  -0.82425902
  0.65850000  -0.82426030
  0.65850000  -0.82426157
  0.65850000  -0.82426285
  0.65850000  -0.82426412
  0.65850000  -0.82426539
  0.65850000  -0.82426665
  0.65850000  -0.82426792
  0.65850000  -0.82426918
  0.65850000  -0.82427044
  0.65850000  -0.82427169
  0.65850000  -0.82427295
  0.65850000  -0.82427420
  0.65850000  -0.82427545
  0.65850000  -0.82427670
  0.65850000  -0.82427795
  0.65900000  -0.82423730
  0.65900000  -0.82423862
  0.65900000  -0.82423994
  0.65900000  -0.82424126
  0.65900000  -0.82424258
  0.65900000  -0.82424390
  0.65900000  -0.82424521
  0.65900000  -0.82424652
  0.65900000  -0.82424783
  0.65900000  -0.82424914
  0.65900000  -0.82425044
  0.65900000  -0.82425174
  0.65900000  -0.82425304
  0.65900000  -0.82425434
  0.65900000  -0.82425564
  0.65900000  -0.82425693
  0.65900000  -0.82425822
  0.65900000  -0.82425951
  0.65900000  -0.82426080
  0.65900000  -0.82426208
  0.65900000  -0.82426336
  0.65900000  -0.82426464
  0.65900000  -0.82426592
  0.65900000  -0.82426720
  0.65900000  -0.82426847
  0.65900000  -0.82426974
  0.65900000  -0.82427101
  0.65900000  -0.82427228
  0.65900000  -0.82427354
  0.65900000  -0.82427481
  0.65900000  -0.82427607
  0.65900000  -0.82427733
  0.65900000  -0.82427858
  0.65900000  -0.82427984
  0.65900000  -0.82428109
  0.65900000  -0.82428234
  0.65900000  -0.82428359
  0.65900000  -0.82428483
  0.65900000  -0.82428608
  0.65900000  -0.82428732
  0.65950000  -0.82424683
  0.65950000  -0.82424815
  0.65950000  -0.82424947
  0.65950000  -0.82425079
  0.65950000  -0.82425210
  0.65950000  -0.82425341
  0.65950000  -0.82425472
  0.65950000  -0.82425602
  0.65950000  -0.82425732
  0.65950000  -0.82425863
  0.65950000  -0.82425992
  0.65950000  -0.82426122
  0.65950000  -0.82426252
  0.65950000  -0.82426381
  0.65950000  -0.82426510
  0.65950000  -0.82426639
  0.65950000  -0.82426767
  0.65950000  -0.82426895
  0.65950000  -0.82427024
  0.65950000  -0.82427151
  0.65950000  -0.82427279
  0.65950000  -0.82427407
  0.65950000  -0.82427534
  0.65950000  -0.82427661
  0.65950000  -0.82427788
  0.65950000  -0.82427914
  0.65950000  -0.82428041
  0.65950000  -0.82428167
  0.65950000  -0.82428293
  0.65950000  -0.82428419
  0.65950000  -0.82428544
  0.65950000  -0.82428669
  0.65950000  -0.82428795
  0.65950000  -0.82428920
  0.65950000  -0.82429044
  0.65950000  -0.82429169
  0.65950000  -0.82429293
  0.65950000  -0.82429417
  0.65950000  -0.82429541
  0.65950000  -0.82429665
  0.66000000  -0.82425633
  0.66000000  -0.82425764
  0.66000000  -0.82425895
  0.66000000  -0.82426026
  0.66000000  -0.82426157
  0.66000000  -0.82426287
  0.66000000  -0.82426418
  0.66000000  -0.82426548
  0.66000000  -0.82426678
  0.66000000  -0.82426807
  0.66000000  -0.82426936
  0.66000000  -0.82427066
  0.66000000  -0.82427194
  0.66000000  -0.82427323
  0.66000000  -0.82427452
  0.66000000  -0.82427580
  0.66000000  -0.82427708
  0.66000000  -0.82427836
  0.66000000  -0.82427963
  0.66000000  -0.82428091
  0.66000000  -0.82428218
  0.66000000  -0.82428345
  0.66000000  -0.82428471
  0.66000000  -0.82428598
  0.66000000  -0.82428724
  0.66000000  -0.82428850
  0.66000000  -0.82428976
  0.66000000  -0.82429102
  0.66000000  -0.82429227
  0.66000000  -0.82429352
  0.66000000  -0.82429477
  0.66000000  -0.82429602
  0.66000000  -0.82429727
  0.66000000  -0.82429851
  0.66000000  -0.82429975
  0.66000000  -0.82430099
  0.66000000  -0.82430223
  0.66000000  -0.82430347
  0.66000000  -0.82430470
  0.66000000  -0.82430593
  0.66050000  -0.82426578
  0.66050000  -0.82426709
  0.66050000  -0.82426840
  0.66050000  -0.82426970
  0.66050000  -0.82427100
  0.66050000  -0.82427230
  0.66050000  -0.82427360
  0.66050000  -0.82427489
  0.66050000  -0.82427618
  0.66050000  -0.82427747
  0.66050000  -0.82427876
  0.66050000  -0.82428005
  0.66050000  -0.82428133
  0.66050000  -0.82428261
  0.66050000  -0.82428389
  0.66050000  -0.82428517
  0.66050000  -0.82428644
  0.66050000  -0.82428772
  0.66050000  -0.82428899
  0.66050000  -0.82429025
  0.66050000  -0.82429152
  0.66050000  -0.82429278
  0.66050000  -0.82429405
  0.66050000  -0.82429530
  0.66050000  -0.82429656
  0.66050000  -0.82429782
  0.66050000  -0.82429907
  0.66050000  -0.82430032
  0.66050000  -0.82430157
  0.66050000  -0.82430282
  0.66050000  -0.82430406
  0.66050000  -0.82430531
  0.66050000  -0.82430655
  0.66050000  -0.82430778
  0.66050000  -0.82430902
  0.66050000  -0.82431026
  0.66050000  -0.82431149
  0.66050000  -0.82431272
  0.66050000  -0.82431395
  0.66050000  -0.82431517
  0.66100000  -0.82427519
  0.66100000  -0.82427649
  0.66100000  -0.82427779
  0.66100000  -0.82427909
  0.66100000  -0.82428039
  0.66100000  -0.82428168
  0.66100000  -0.82428297
  0.66100000  -0.82428426
  0.66100000  -0.82428555
  0.66100000  -0.82428683
  0.66100000  -0.82428812
  0.66100000  -0.82428940
  0.66100000  -0.82429067
  0.66100000  -0.82429195
  0.66100000  -0.82429322
  0.66100000  -0.82429450
  0.66100000  -0.82429576
  0.66100000  -0.82429703
  0.66100000  -0.82429830
  0.66100000  -0.82429956
  0.66100000  -0.82430082
  0.66100000  -0.82430208
  0.66100000  -0.82430334
  0.66100000  -0.82430459
  0.66100000  -0.82430584
  0.66100000  -0.82430709
  0.66100000  -0.82430834
  0.66100000  -0.82430959
  0.66100000  -0.82431083
  0.66100000  -0.82431207
  0.66100000  -0.82431331
  0.66100000  -0.82431455
  0.66100000  -0.82431578
  0.66100000  -0.82431702
  0.66100000  -0.82431825
  0.66100000  -0.82431948
  0.66100000  -0.82432070
  0.66100000  -0.82432193
  0.66100000  -0.82432315
  0.66100000  -0.82432437
  0.66150000  -0.82428456
  0.66150000  -0.82428586
  0.66150000  -0.82428715
  0.66150000  -0.82428844
  0.66150000  -0.82428973
  0.66150000  -0.82429102
  0.66150000  -0.82429231
  0.66150000  -0.82429359
  0.66150000  -0.82429487
  0.66150000  -0.82429615
  0.66150000  -0.82429743
  0.66150000  -0.82429870
  0.66150000  -0.82429998
  0.66150000  -0.82430125
  0.66150000  -0.82430251
  0.66150000  -0.82430378
  0.66150000  -0.82430504
  0.66150000  -0.82430631
  0.66150000  -0.82430757
  0.66150000  -0.82430882
  0.66150000  -0.82431008
  0.66150000  -0.82431133
  0.66150000  -0.82431258
  0.66150000  -0.82431383
  0.66150000  -0.82431508
  0.66150000  -0.82431632
  0.66150000  -0.82431757
  0.66150000  -0.82431881
  0.66150000  -0.82432005
  0.66150000  -0.82432128
  0.66150000  -0.82432252
  0.66150000  -0.82432375
  0.66150000  -0.82432498
  0.66150000  -0.82432621
  0.66150000  -0.82432743
  0.66150000  -0.82432866
  0.66150000  -0.82432988
  0.66150000  -0.82433110
  0.66150000  -0.82433232
  0.66150000  -0.82433353
  0.66200000  -0.82429388
  0.66200000  -0.82429518
  0.66200000  -0.82429646
  0.66200000  -0.82429775
  0.66200000  -0.82429904
  0.66200000  -0.82430032
  0.66200000  -0.82430160
  0.66200000  -0.82430288
  0.66200000  -0.82430415
  0.66200000  -0.82430543
  0.66200000  -0.82430670
  0.66200000  -0.82430797
  0.66200000  -0.82430924
  0.66200000  -0.82431050
  0.66200000  -0.82431176
  0.66200000  -0.82431302
  0.66200000  -0.82431428
  0.66200000  -0.82431554
  0.66200000  -0.82431679
  0.66200000  -0.82431805
  0.66200000  -0.82431930
  0.66200000  -0.82432054
  0.66200000  -0.82432179
  0.66200000  -0.82432303
  0.66200000  -0.82432427
  0.66200000  -0.82432551
  0.66200000  -0.82432675
  0.66200000  -0.82432799
  0.66200000  -0.82432922
  0.66200000  -0.82433045
  0.66200000  -0.82433168
  0.66200000  -0.82433291
  0.66200000  -0.82433413
  0.66200000  -0.82433535
  0.66200000  -0.82433658
  0.66200000  -0.82433779
  0.66200000  -0.82433901
  0.66200000  -0.82434023
  0.66200000  -0.82434144
  0.66200000  -0.82434265
  0.66250000  -0.82430317
  0.66250000  -0.82430445
  0.66250000  -0.82430574
  0.66250000  -0.82430702
  0.66250000  -0.82430830
  0.66250000  -0.82430958
  0.66250000  -0.82431085
  0.66250000  -0.82431212
  0.66250000  -0.82431339
  0.66250000  -0.82431466
  0.66250000  -0.82431593
  0.66250000  -0.82431719
  0.66250000  -0.82431845
  0.66250000  -0.82431971
  0.66250000  -0.82432097
  0.66250000  -0.82432223
  0.66250000  -0.82432348
  0.66250000  -0.82432473
  0.66250000  -0.82432598
  0.66250000  -0.82432723
  0.66250000  -0.82432847
  0.66250000  -0.82432971
  0.66250000  -0.82433095
  0.66250000  -0.82433219
  0.66250000  -0.82433343
  0.66250000  -0.82433466
  0.66250000  -0.82433590
  0.66250000  -0.82433713
  0.66250000  -0.82433835
  0.66250000  -0.82433958
  0.66250000  -0.82434080
  0.66250000  -0.82434202
  0.66250000  -0.82434324
  0.66250000  -0.82434446
  0.66250000  -0.82434568
  0.66250000  -0.82434689
  0.66250000  -0.82434810
  0.66250000  -0.82434931
  0.66250000  -0.82435052
  0.66250000  -0.82435172
  0.66300000  -0.82431241
  0.66300000  -0.82431369
  0.66300000  -0.82431497
  0.66300000  -0.82431624
  0.66300000  -0.82431752
  0.66300000  -0.82431879
  0.66300000  -0.82432006
  0.66300000  -0.82432133
  0.66300000  -0.82432259
  0.66300000  -0.82432385
  0.66300000  -0.82432512
  0.66300000  -0.82432637
  0.66300000  -0.82432763
  0.66300000  -0.82432889
  0.66300000  -0.82433014
  0.66300000  -0.82433139
  0.66300000  -0.82433264
  0.66300000  -0.82433388
  0.66300000  -0.82433512
  0.66300000  -0.82433637
  0.66300000  -0.82433761
  0.66300000  -0.82433884
  0.66300000  -0.82434008
  0.66300000  -0.82434131
  0.66300000  -0.82434254
  0.66300000  -0.82434377
  0.66300000  -0.82434500
  0.66300000  -0.82434622
  0.66300000  -0.82434745
  0.66300000  -0.82434867
  0.66300000  -0.82434988
  0.66300000  -0.82435110
  0.66300000  -0.82435232
  0.66300000  -0.82435353
  0.66300000  -0.82435474
  0.66300000  -0.82435595
  0.66300000  -0.82435715
  0.66300000  -0.82435836
  0.66300000  -0.82435956
  0.66300000  -0.82436076
  0.66350000  -0.82432161
  0.66350000  -0.82432288
  0.66350000  -0.82432416
  0.66350000  -0.82432543
  0.66350000  -0.82432670
  0.66350000  -0.82432796
  0.66350000  -0.82432923
  0.66350000  -0.82433049
  0.66350000  -0.82433175
  0.66350000  -0.82433301
  0.66350000  -0.82433426
  0.66350000  -0.82433551
  0.66350000  -0.82433677
  0.66350000  -0.82433801
  0.66350000  -0.82433926
  0.66350000  -0.82434051
  0.66350000  -0.82434175
  0.66350000  -0.82434299
  0.66350000  -0.82434423
  0.66350000  -0.82434546
  0.66350000  -0.82434670
  0.66350000  -0.82434793
  0.66350000  -0.82434916
  0.66350000  -0.82435039
  0.66350000  -0.82435161
  0.66350000  -0.82435284
  0.66350000  -0.82435406
  0.66350000  -0.82435528
  0.66350000  -0.82435650
  0.66350000  -0.82435771
  0.66350000  -0.82435892
  0.66350000  -0.82436014
  0.66350000  -0.82436135
  0.66350000  -0.82436255
  0.66350000  -0.82436376
  0.66350000  -0.82436496
  0.66350000  -0.82436616
  0.66350000  -0.82436736
  0.66350000  -0.82436856
  0.66350000  -0.82436975
  0.66400000  -0.82433077
  0.66400000  -0.82433204
  0.66400000  -0.82433330
  0.66400000  -0.82433457
  0.66400000  -0.82433583
  0.66400000  -0.82433709
  0.66400000  -0.82433835
  0.66400000  -0.82433961
  0.66400000  -0.82434086
  0.66400000  -0.82434212
  0.66400000  -0.82434337
  0.66400000  -0.82434461
  0.66400000  -0.82434586
  0.66400000  -0.82434710
  0.66400000  -0.82434835
  0.66400000  -0.82434958
  0.66400000  -0.82435082
  0.66400000  -0.82435206
  0.66400000  -0.82435329
  0.66400000  -0.82435452
  0.66400000  -0.82435575
  0.66400000  -0.82435698
  0.66400000  -0.82435820
  0.66400000  -0.82435942
  0.66400000  -0.82436064
  0.66400000  -0.82436186
  0.66400000  -0.82436308
  0.66400000  -0.82436429
  0.66400000  -0.82436551
  0.66400000  -0.82436672
  0.66400000  -0.82436792
  0.66400000  -0.82436913
  0.66400000  -0.82437033
  0.66400000  -0.82437154
  0.66400000  -0.82437274
  0.66400000  -0.82437393
  0.66400000  -0.82437513
  0.66400000  -0.82437632
  0.66400000  -0.82437752
  0.66400000  -0.82437871
  0.66450000  -0.82433988
  0.66450000  -0.82434115
  0.66450000  -0.82434241
  0.66450000  -0.82434367
  0.66450000  -0.82434493
  0.66450000  -0.82434618
  0.66450000  -0.82434744
  0.66450000  -0.82434869
  0.66450000  -0.82434994
  0.66450000  -0.82435118
  0.66450000  -0.82435243
  0.66450000  -0.82435367
  0.66450000  -0.82435491
  0.66450000  -0.82435615
  0.66450000  -0.82435739
  0.66450000  -0.82435862
  0.66450000  -0.82435985
  0.66450000  -0.82436108
  0.66450000  -0.82436231
  0.66450000  -0.82436354
  0.66450000  -0.82436476
  0.66450000  -0.82436598
  0.66450000  -0.82436720
  0.66450000  -0.82436842
  0.66450000  -0.82436963
  0.66450000  -0.82437085
  0.66450000  -0.82437206
  0.66450000  -0.82437327
  0.66450000  -0.82437448
  0.66450000  -0.82437568
  0.66450000  -0.82437688
  0.66450000  -0.82437808
  0.66450000  -0.82437928
  0.66450000  -0.82438048
  0.66450000  -0.82438168
  0.66450000  -0.82438287
  0.66450000  -0.82438406
  0.66450000  -0.82438525
  0.66450000  -0.82438643
  0.66450000  -0.82438762
  0.66500000  -0.82434896
  0.66500000  -0.82435022
  0.66500000  -0.82435148
  0.66500000  -0.82435273
  0.66500000  -0.82435398
  0.66500000  -0.82435523
  0.66500000  -0.82435648
  0.66500000  -0.82435773
  0.66500000  -0.82435897
  0.66500000  -0.82436021
  0.66500000  -0.82436145
  0.66500000  -0.82436269
  0.66500000  -0.82436392
  0.66500000  -0.82436516
  0.66500000  -0.82436639
  0.66500000  -0.82436762
  0.66500000  -0.82436884
  0.66500000  -0.82437007
  0.66500000  -0.82437129
  0.66500000  -0.82437251
  0.66500000  -0.82437373
  0.66500000  -0.82437495
  0.66500000  -0.82437616
  0.66500000  -0.82437737
  0.66500000  -0.82437858
  0.66500000  -0.82437979
  0.66500000  -0.82438100
  0.66500000  -0.82438220
  0.66500000  -0.82438340
  0.66500000  -0.82438460
  0.66500000  -0.82438580
  0.66500000  -0.82438700
  0.66500000  -0.82438819
  0.66500000  -0.82438938
  0.66500000  -0.82439057
  0.66500000  -0.82439176
  0.66500000  -0.82439295
  0.66500000  -0.82439413
  0.66500000  -0.82439531
  0.66500000  -0.82439649
  0.66550000  -0.82435799
  0.66550000  -0.82435925
  0.66550000  -0.82436050
  0.66550000  -0.82436175
  0.66550000  -0.82436300
  0.66550000  -0.82436424
  0.66550000  -0.82436548
  0.66550000  -0.82436672
  0.66550000  -0.82436796
  0.66550000  -0.82436920
  0.66550000  -0.82437043
  0.66550000  -0.82437167
  0.66550000  -0.82437290
  0.66550000  -0.82437412
  0.66550000  -0.82437535
  0.66550000  -0.82437657
  0.66550000  -0.82437779
  0.66550000  -0.82437901
  0.66550000  -0.82438023
  0.66550000  -0.82438145
  0.66550000  -0.82438266
  0.66550000  -0.82438387
  0.66550000  -0.82438508
  0.66550000  -0.82438629
  0.66550000  -0.82438749
  0.66550000  -0.82438870
  0.66550000  -0.82438990
  0.66550000  -0.82439110
  0.66550000  -0.82439229
  0.66550000  -0.82439349
  0.66550000  -0.82439468
  0.66550000  -0.82439587
  0.66550000  -0.82439706
  0.66550000  -0.82439825
  0.66550000  -0.82439943
  0.66550000  -0.82440061
  0.66550000  -0.82440179
  0.66550000  -0.82440297
  0.66550000  -0.82440415
  0.66550000  -0.82440532
  0.66600000  -0.82436699
  0.66600000  -0.82436824
  0.66600000  -0.82436948
  0.66600000  -0.82437073
  0.66600000  -0.82437197
  0.66600000  -0.82437321
  0.66600000  -0.82437445
  0.66600000  -0.82437568
  0.66600000  -0.82437692
  0.66600000  -0.82437815
  0.66600000  -0.82437938
  0.66600000  -0.82438060
  0.66600000  -0.82438183
  0.66600000  -0.82438305
  0.66600000  -0.82438427
  0.66600000  -0.82438549
  0.66600000  -0.82438670
  0.66600000  -0.82438792
  0.66600000  -0.82438913
  0.66600000  -0.82439034
  0.66600000  -0.82439155
  0.66600000  -0.82439276
  0.66600000  -0.82439396
  0.66600000  -0.82439516
  0.66600000  -0.82439636
  0.66600000  -0.82439756
  0.66600000  -0.82439875
  0.66600000  -0.82439995
  0.66600000  -0.82440114
  0.66600000  -0.82440233
  0.66600000  -0.82440352
  0.66600000  -0.82440470
  0.66600000  -0.82440589
  0.66600000  -0.82440707
  0.66600000  -0.82440825
  0.66600000  -0.82440943
  0.66600000  -0.82441060
  0.66600000  -0.82441178
  0.66600000  -0.82441295
  0.66600000  -0.82441412
  0.66650000  -0.82437594
  0.66650000  -0.82437719
  0.66650000  -0.82437843
  0.66650000  -0.82437967
  0.66650000  -0.82438090
  0.66650000  -0.82438214
  0.66650000  -0.82438337
  0.66650000  -0.82438460
  0.66650000  -0.82438583
  0.66650000  -0.82438705
  0.66650000  -0.82438828
  0.66650000  -0.82438950
  0.66650000  -0.82439072
  0.66650000  -0.82439193
  0.66650000  -0.82439315
  0.66650000  -0.82439436
  0.66650000  -0.82439557
  0.66650000  -0.82439678
  0.66650000  -0.82439799
  0.66650000  -0.82439920
  0.66650000  -0.82440040
  0.66650000  -0.82440160
  0.66650000  -0.82440280
  0.66650000  -0.82440399
  0.66650000  -0.82440519
  0.66650000  -0.82440638
  0.66650000  -0.82440757
  0.66650000  -0.82440876
  0.66650000  -0.82440995
  0.66650000  -0.82441113
  0.66650000  -0.82441232
  0.66650000  -0.82441350
  0.66650000  -0.82441467
  0.66650000  -0.82441585
  0.66650000  -0.82441703
  0.66650000  -0.82441820
  0.66650000  -0.82441937
  0.66650000  -0.82442054
  0.66650000  -0.82442170
  0.66650000  -0.82442287
  0.66700000  -0.82438486
  0.66700000  -0.82438609
  0.66700000  -0.82438733
  0.66700000  -0.82438856
  0.66700000  -0.82438979
  0.66700000  -0.82439102
  0.66700000  -0.82439225
  0.66700000  -0.82439347
  0.66700000  -0.82439470
  0.66700000  -0.82439592
  0.66700000  -0.82439714
  0.66700000  -0.82439835
  0.66700000  -0.82439957
  0.66700000  -0.82440078
  0.66700000  -0.82440199
  0.66700000  -0.82440320
  0.66700000  -0.82440440
  0.66700000  -0.82440561
  0.66700000  -0.82440681
  0.66700000  -0.82440801
  0.66700000  -0.82440921
  0.66700000  -0.82441040
  0.66700000  -0.82441160
  0.66700000  -0.82441279
  0.66700000  -0.82441398
  0.66700000  -0.82441517
  0.66700000  -0.82441635
  0.66700000  -0.82441753
  0.66700000  -0.82441872
  0.66700000  -0.82441990
  0.66700000  -0.82442107
  0.66700000  -0.82442225
  0.66700000  -0.82442342
  0.66700000  -0.82442459
  0.66700000  -0.82442576
  0.66700000  -0.82442693
  0.66700000  -0.82442810
  0.66700000  -0.82442926
  0.66700000  -0.82443042
  0.66700000  -0.82443158
  0.66750000  -0.82439373
  0.66750000  -0.82439496
  0.66750000  -0.82439619
  0.66750000  -0.82439742
  0.66750000  -0.82439865
  0.66750000  -0.82439987
  0.66750000  -0.82440109
  0.66750000  -0.82440231
  0.66750000  -0.82440353
  0.66750000  -0.82440474
  0.66750000  -0.82440596
  0.66750000  -0.82440717
  0.66750000  -0.82440838
  0.66750000  -0.82440958
  0.66750000  -0.82441079
  0.66750000  -0.82441199
  0.66750000  -0.82441319
  0.66750000  -0.82441439
  0.66750000  -0.82441559
  0.66750000  -0.82441678
  0.66750000  -0.82441798
  0.66750000  -0.82441917
  0.66750000  -0.82442036
  0.66750000  -0.82442154
  0.66750000  -0.82442273
  0.66750000  -0.82442391
  0.66750000  -0.82442509
  0.66750000  -0.82442627
  0.66750000  -0.82442744
  0.66750000  -0.82442862
  0.66750000  -0.82442979
  0.66750000  -0.82443096
  0.66750000  -0.82443213
  0.66750000  -0.82443330
  0.66750000  -0.82443446
  0.66750000  -0.82443562
  0.66750000  -0.82443678
  0.66750000  -0.82443794
  0.66750000  -0.82443910
  0.66750000  -0.82444026
  0.66800000  -0.82440256
  0.66800000  -0.82440379
  0.66800000  -0.82440501
  0.66800000  -0.82440624
  0.66800000  -0.82440746
  0.66800000  -0.82440868
  0.66800000  -0.82440989
  0.66800000  -0.82441111
  0.66800000  -0.82441232
  0.66800000  -0.82441353
  0.66800000  -0.82441474
  0.66800000  -0.82441594
  0.66800000  -0.82441715
  0.66800000  -0.82441835
  0.66800000  -0.82441955
  0.66800000  -0.82442075
  0.66800000  -0.82442194
  0.66800000  -0.82442314
  0.66800000  -0.82442433
  0.66800000  -0.82442552
  0.66800000  -0.82442671
  0.66800000  -0.82442789
  0.66800000  -0.82442907
  0.66800000  -0.82443026
  0.66800000  -0.82443144
  0.66800000  -0.82443261
  0.66800000  -0.82443379
  0.66800000  -0.82443496
  0.66800000  -0.82443613
  0.66800000  -0.82443730
  0.66800000  -0.82443847
  0.66800000  -0.82443964
  0.66800000  -0.82444080
  0.66800000  -0.82444196
  0.66800000  -0.82444312
  0.66800000  -0.82444428
  0.66800000  -0.82444543
  0.66800000  -0.82444659
  0.66800000  -0.82444774
  0.66800000  -0.82444889
  0.66850000  -0.82441136
  0.66850000  -0.82441258
  0.66850000  -0.82441380
  0.66850000  -0.82441501
  0.66850000  -0.82441623
  0.66850000  -0.82441744
  0.66850000  -0.82441865
  0.66850000  -0.82441986
  0.66850000  -0.82442107
  0.66850000  -0.82442228
  0.66850000  -0.82442348
  0.66850000  -0.82442468
  0.66850000  -0.82442588
  0.66850000  -0.82442708
  0.66850000  -0.82442827
  0.66850000  -0.82442946
  0.66850000  -0.82443065
  0.66850000  -0.82443184
  0.66850000  -0.82443303
  0.66850000  -0.82443421
  0.66850000  -0.82443540
  0.66850000  -0.82443658
  0.66850000  -0.82443775
  0.66850000  -0.82443893
  0.66850000  -0.82444010
  0.66850000  -0.82444128
  0.66850000  -0.82444245
  0.66850000  -0.82444362
  0.66850000  -0.82444478
  0.66850000  -0.82444595
  0.66850000  -0.82444711
  0.66850000  -0.82444827
  0.66850000  -0.82444943
  0.66850000  -0.82445058
  0.66850000  -0.82445174
  0.66850000  -0.82445289
  0.66850000  -0.82445404
  0.66850000  -0.82445519
  0.66850000  -0.82445634
  0.66850000  -0.82445748
  0.66900000  -0.82442011
  0.66900000  -0.82442133
  0.66900000  -0.82442254
  0.66900000  -0.82442375
  0.66900000  -0.82442496
  0.66900000  -0.82442617
  0.66900000  -0.82442738
  0.66900000  -0.82442858
  0.66900000  -0.82442978
  0.66900000  -0.82443098
  0.66900000  -0.82443218
  0.66900000  -0.82443338
  0.66900000  -0.82443457
  0.66900000  -0.82443576
  0.66900000  -0.82443695
  0.66900000  -0.82443814
  0.66900000  -0.82443932
  0.66900000  -0.82444051
  0.66900000  -0.82444169
  0.66900000  -0.82444287
  0.66900000  -0.82444405
  0.66900000  -0.82444522
  0.66900000  -0.82444639
  0.66900000  -0.82444757
  0.66900000  -0.82444874
  0.66900000  -0.82444990
  0.66900000  -0.82445107
  0.66900000  -0.82445223
  0.66900000  -0.82445339
  0.66900000  -0.82445455
  0.66900000  -0.82445571
  0.66900000  -0.82445687
  0.66900000  -0.82445802
  0.66900000  -0.82445917
  0.66900000  -0.82446032
  0.66900000  -0.82446147
  0.66900000  -0.82446261
  0.66900000  -0.82446376
  0.66900000  -0.82446490
  0.66900000  -0.82446604
  0.66950000  -0.82442882
  0.66950000  -0.82443003
  0.66950000  -0.82443124
  0.66950000  -0.82443245
  0.66950000  -0.82443366
  0.66950000  -0.82443486
  0.66950000  -0.82443606
  0.66950000  -0.82443726
  0.66950000  -0.82443846
  0.66950000  -0.82443965
  0.66950000  -0.82444084
  0.66950000  -0.82444203
  0.66950000  -0.82444322
  0.66950000  -0.82444441
  0.66950000  -0.82444559
  0.66950000  -0.82444678
  0.66950000  -0.82444796
  0.66950000  -0.82444913
  0.66950000  -0.82445031
  0.66950000  -0.82445148
  0.66950000  -0.82445266
  0.66950000  -0.82445383
  0.66950000  -0.82445500
  0.66950000  -0.82445616
  0.66950000  -0.82445733
  0.66950000  -0.82445849
  0.66950000  -0.82445965
  0.66950000  -0.82446081
  0.66950000  -0.82446196
  0.66950000  -0.82446312
  0.66950000  -0.82446427
  0.66950000  -0.82446542
  0.66950000  -0.82446657
  0.66950000  -0.82446772
  0.66950000  -0.82446886
  0.66950000  -0.82447000
  0.66950000  -0.82447115
  0.66950000  -0.82447228
  0.66950000  -0.82447342
  0.66950000  -0.82447456
  0.67000000  -0.82443750
  0.67000000  -0.82443870
  0.67000000  -0.82443991
  0.67000000  -0.82444111
  0.67000000  -0.82444231
  0.67000000  -0.82444351
  0.67000000  -0.82444470
  0.67000000  -0.82444590
  0.67000000  -0.82444709
  0.67000000  -0.82444828
  0.67000000  -0.82444947
  0.67000000  -0.82445065
  0.67000000  -0.82445183
  0.67000000  -0.82445302
  0.67000000  -0.82445420
  0.67000000  -0.82445537
  0.67000000  -0.82445655
  0.67000000  -0.82445772
  0.67000000  -0.82445889
  0.67000000  -0.82446006
  0.67000000  -0.82446123
  0.67000000  -0.82446239
  0.67000000  -0.82446356
  0.67000000  -0.82446472
  0.67000000  -0.82446588
  0.67000000  -0.82446704
  0.67000000  -0.82446819
  0.67000000  -0.82446934
  0.67000000  -0.82447050
  0.67000000  -0.82447165
  0.67000000  -0.82447279
  0.67000000  -0.82447394
  0.67000000  -0.82447508
  0.67000000  -0.82447622
  0.67000000  -0.82447736
  0.67000000  -0.82447850
  0.67000000  -0.82447964
  0.67000000  -0.82448077
  0.67000000  -0.82448190
  0.67000000  -0.82448303
  0.67050000  -0.82444613
  0.67050000  -0.82444733
  0.67050000  -0.82444853
  0.67050000  -0.82444973
  0.67050000  -0.82445092
  0.67050000  -0.82445212
  0.67050000  -0.82445331
  0.67050000  -0.82445450
  0.67050000  -0.82445568
  0.67050000  -0.82445687
  0.67050000  -0.82445805
  0.67050000  -0.82445923
  0.67050000  -0.82446041
  0.67050000  -0.82446158
  0.67050000  -0.82446276
  0.67050000  -0.82446393
  0.67050000  -0.82446510
  0.67050000  -0.82446627
  0.67050000  -0.82446744
  0.67050000  -0.82446860
  0.67050000  -0.82446976
  0.67050000  -0.82447092
  0.67050000  -0.82447208
  0.67050000  -0.82447324
  0.67050000  -0.82447439
  0.67050000  -0.82447554
  0.67050000  -0.82447669
  0.67050000  -0.82447784
  0.67050000  -0.82447899
  0.67050000  -0.82448013
  0.67050000  -0.82448128
  0.67050000  -0.82448242
  0.67050000  -0.82448356
  0.67050000  -0.82448469
  0.67050000  -0.82448583
  0.67050000  -0.82448696
  0.67050000  -0.82448809
  0.67050000  -0.82448922
  0.67050000  -0.82449035
  0.67050000  -0.82449147
  0.67100000  -0.82445473
  0.67100000  -0.82445592
  0.67100000  -0.82445712
  0.67100000  -0.82445831
  0.67100000  -0.82445950
  0.67100000  -0.82446069
  0.67100000  -0.82446187
  0.67100000  -0.82446306
  0.67100000  -0.82446424
  0.67100000  -0.82446542
  0.67100000  -0.82446659
  0.67100000  -0.82446777
  0.67100000  -0.82446894
  0.67100000  -0.82447011
  0.67100000  -0.82447128
  0.67100000  -0.82447245
  0.67100000  -0.82447362
  0.67100000  -0.82447478
  0.67100000  -0.82447594
  0.67100000  -0.82447710
  0.67100000  -0.82447826
  0.67100000  -0.82447941
  0.67100000  -0.82448057
  0.67100000  -0.82448172
  0.67100000  -0.82448287
  0.67100000  -0.82448401
  0.67100000  -0.82448516
  0.67100000  -0.82448630
  0.67100000  -0.82448744
  0.67100000  -0.82448858
  0.67100000  -0.82448972
  0.67100000  -0.82449086
  0.67100000  -0.82449199
  0.67100000  -0.82449312
  0.67100000  -0.82449425
  0.67100000  -0.82449538
  0.67100000  -0.82449651
  0.67100000  -0.82449763
  0.67100000  -0.82449875
  0.67100000  -0.82449988
  0.67150000  -0.82446329
  0.67150000  -0.82446448
  0.67150000  -0.82446566
  0.67150000  -0.82446685
  0.67150000  -0.82446804
  0.67150000  -0.82446922
  0.67150000  -0.82447040
  0.67150000  -0.82447158
  0.67150000  -0.82447275
  0.67150000  -0.82447393
  0.67150000  -0.82447510
  0.67150000  -0.82447627
  0.67150000  -0.82447744
  0.67150000  -0.82447861
  0.67150000  -0.82447977
  0.67150000  -0.82448093
  0.67150000  -0.82448209
  0.67150000  -0.82448325
  0.67150000  -0.82448441
  0.67150000  -0.82448556
  0.67150000  -0.82448671
  0.67150000  -0.82448786
  0.67150000  -0.82448901
  0.67150000  -0.82449016
  0.67150000  -0.82449130
  0.67150000  -0.82449245
  0.67150000  -0.82449359
  0.67150000  -0.82449472
  0.67150000  -0.82449586
  0.67150000  -0.82449700
  0.67150000  -0.82449813
  0.67150000  -0.82449926
  0.67150000  -0.82450039
  0.67150000  -0.82450152
  0.67150000  -0.82450264
  0.67150000  -0.82450376
  0.67150000  -0.82450489
  0.67150000  -0.82450601
  0.67150000  -0.82450712
  0.67150000  -0.82450824
  0.67200000  -0.82447180
  0.67200000  -0.82447299
  0.67200000  -0.82447417
  0.67200000  -0.82447535
  0.67200000  -0.82447653
  0.67200000  -0.82447771
  0.67200000  -0.82447889
  0.67200000  -0.82448006
  0.67200000  -0.82448123
  0.67200000  -0.82448240
  0.67200000  -0.82448357
  0.67200000  -0.82448473
  0.67200000  -0.82448590
  0.67200000  -0.82448706
  0.67200000  -0.82448822
  0.67200000  -0.82448937
  0.67200000  -0.82449053
  0.67200000  -0.82449168
  0.67200000  -0.82449283
  0.67200000  -0.82449398
  0.67200000  -0.82449513
  0.67200000  -0.82449628
  0.67200000  -0.82449742
  0.67200000  -0.82449856
  0.67200000  -0.82449970
  0.67200000  -0.82450084
  0.67200000  -0.82450197
  0.67200000  -0.82450311
  0.67200000  -0.82450424
  0.67200000  -0.82450537
  0.67200000  -0.82450650
  0.67200000  -0.82450762
  0.67200000  -0.82450875
  0.67200000  -0.82450987
  0.67200000  -0.82451099
  0.67200000  -0.82451211
  0.67200000  -0.82451323
  0.67200000  -0.82451434
  0.67200000  -0.82451545
  0.67200000  -0.82451656
  0.67250000  -0.82448028
  0.67250000  -0.82448146
  0.67250000  -0.82448264
  0.67250000  -0.82448382
  0.67250000  -0.82448499
  0.67250000  -0.82448617
  0.67250000  -0.82448734
  0.67250000  -0.82448851
  0.67250000  -0.82448967
  0.67250000  -0.82449084
  0.67250000  -0.82449200
  0.67250000  -0.82449316
  0.67250000  -0.82449432
  0.67250000  -0.82449547
  0.67250000  -0.82449663
  0.67250000  -0.82449778
  0.67250000  -0.82449893
  0.67250000  -0.82450008
  0.67250000  -0.82450122
  0.67250000  -0.82450237
  0.67250000  -0.82450351
  0.67250000  -0.82450465
  0.67250000  -0.82450579
  0.67250000  -0.82450693
  0.67250000  -0.82450806
  0.67250000  -0.82450919
  0.67250000  -0.82451032
  0.67250000  -0.82451145
  0.67250000  -0.82451258
  0.67250000  -0.82451371
  0.67250000  -0.82451483
  0.67250000  -0.82451595
  0.67250000  -0.82451707
  0.67250000  -0.82451819
  0.67250000  -0.82451930
  0.67250000  -0.82452041
  0.67250000  -0.82452153
  0.67250000  -0.82452264
  0.67250000  -0.82452374
  0.67250000  -0.82452485
  0.67300000  -0.82448873
  0.67300000  -0.82448990
  0.67300000  -0.82449107
  0.67300000  -0.82449225
  0.67300000  -0.82449342
  0.67300000  -0.82449458
  0.67300000  -0.82449575
  0.67300000  -0.82449691
  0.67300000  -0.82449807
  0.67300000  -0.82449923
  0.67300000  -0.82450039
  0.67300000  -0.82450154
  0.67300000  -0.82450270
  0.67300000  -0.82450385
  0.67300000  -0.82450500
  0.67300000  -0.82450615
  0.67300000  -0.82450729
  0.67300000  -0.82450843
  0.67300000  -0.82450958
  0.67300000  -0.82451071
  0.67300000  -0.82451185
  0.67300000  -0.82451299
  0.67300000  -0.82451412
  0.67300000  -0.82451525
  0.67300000  -0.82451638
  0.67300000  -0.82451751
  0.67300000  -0.82451864
  0.67300000  -0.82451976
  0.67300000  -0.82452088
  0.67300000  -0.82452200
  0.67300000  -0.82452312
  0.67300000  -0.82452424
  0.67300000  -0.82452535
  0.67300000  -0.82452646
  0.67300000  -0.82452757
  0.67300000  -0.82452868
  0.67300000  -0.82452979
  0.67300000  -0.82453090
  0.67300000  -0.82453200
  0.67300000  -0.82453310
  0.67350000  -0.82449713
  0.67350000  -0.82449830
  0.67350000  -0.82449947
  0.67350000  -0.82450063
  0.67350000  -0.82450180
  0.67350000  -0.82450296
  0.67350000  -0.82450412
  0.67350000  -0.82450528
  0.67350000  -0.82450644
  0.67350000  -0.82450759
  0.67350000  -0.82450874
  0.67350000  -0.82450989
  0.67350000  -0.82451104
  0.67350000  -0.82451219
  0.67350000  -0.82451333
  0.67350000  -0.82451447
  0.67350000  -0.82451561
  0.67350000  -0.82451675
  0.67350000  -0.82451789
  0.67350000  -0.82451902
  0.67350000  -0.82452016
  0.67350000  -0.82452129
  0.67350000  -0.82452242
  0.67350000  -0.82452354
  0.67350000  -0.82452467
  0.67350000  -0.82452579
  0.67350000  -0.82452691
  0.67350000  -0.82452803
  0.67350000  -0.82452915
  0.67350000  -0.82453026
  0.67350000  -0.82453138
  0.67350000  -0.82453249
  0.67350000  -0.82453360
  0.67350000  -0.82453470
  0.67350000  -0.82453581
  0.67350000  -0.82453691
  0.67350000  -0.82453802
  0.67350000  -0.82453912
  0.67350000  -0.82454022
  0.67350000  -0.82454131
  0.67400000  -0.82450549
  0.67400000  -0.82450666
  0.67400000  -0.82450782
  0.67400000  -0.82450898
  0.67400000  -0.82451014
  0.67400000  -0.82451130
  0.67400000  -0.82451246
  0.67400000  -0.82451361
  0.67400000  -0.82451476
  0.67400000  -0.82451591
  0.67400000  -0.82451706
  0.67400000  -0.82451820
  0.67400000  -0.82451935
  0.67400000  -0.82452049
  0.67400000  -0.82452163
  0.67400000  -0.82452276
  0.67400000  -0.82452390
  0.67400000  -0.82452503
  0.67400000  -0.82452616
  0.67400000  -0.82452729
  0.67400000  -0.82452842
  0.67400000  -0.82452955
  0.67400000  -0.82453067
  0.67400000  -0.82453179
  0.67400000  -0.82453291
  0.67400000  -0.82453403
  0.67400000  -0.82453515
  0.67400000  -0.82453626
  0.67400000  -0.82453737
  0.67400000  -0.82453848
  0.67400000  -0.82453959
  0.67400000  -0.82454070
  0.67400000  -0.82454181
  0.67400000  -0.82454291
  0.67400000  -0.82454401
  0.67400000  -0.82454511
  0.67400000  -0.82454621
  0.67400000  -0.82454730
  0.67400000  -0.82454839
  0.67400000  -0.82454949
  0.67450000  -0.82451382
  0.67450000  -0.82451498
  0.67450000  -0.82451614
  0.67450000  -0.82451730
  0.67450000  -0.82451845
  0.67450000  -0.82451960
  0.67450000  -0.82452075
  0.67450000  -0.82452190
  0.67450000  -0.82452305
  0.67450000  -0.82452419
  0.67450000  -0.82452533
  0.67450000  -0.82452648
  0.67450000  -0.82452761
  0.67450000  -0.82452875
  0.67450000  -0.82452988
  0.67450000  -0.82453102
  0.67450000  -0.82453215
  0.67450000  -0.82453328
  0.67450000  -0.82453440
  0.67450000  -0.82453553
  0.67450000  -0.82453665
  0.67450000  -0.82453777
  0.67450000  -0.82453889
  0.67450000  -0.82454001
  0.67450000  -0.82454112
  0.67450000  -0.82454224
  0.67450000  -0.82454335
  0.67450000  -0.82454446
  0.67450000  -0.82454556
  0.67450000  -0.82454667
  0.67450000  -0.82454777
  0.67450000  -0.82454888
  0.67450000  -0.82454998
  0.67450000  -0.82455107
  0.67450000  -0.82455217
  0.67450000  -0.82455326
  0.67450000  -0.82455436
  0.67450000  -0.82455545
  0.67450000  -0.82455654
  0.67450000  -0.82455762
  0.67500000  -0.82452211
  0.67500000  -0.82452327
  0.67500000  -0.82452442
  0.67500000  -0.82452557
  0.67500000  -0.82452672
  0.67500000  -0.82452787
  0.67500000  -0.82452901
  0.67500000  -0.82453016
  0.67500000  -0.82453130
  0.67500000  -0.82453244
  0.67500000  -0.82453357
  0.67500000  -0.82453471
  0.67500000  -0.82453584
  0.67500000  -0.82453698
  0.67500000  -0.82453810
  0.67500000  -0.82453923
  0.67500000  -0.82454036
  0.67500000  -0.82454148
  0.67500000  -0.82454260
  0.67500000  -0.82454372
  0.67500000  -0.82454484
  0.67500000  -0.82454596
  0.67500000  -0.82454707
  0.67500000  -0.82454818
  0.67500000  -0.82454929
  0.67500000  -0.82455040
  0.67500000  -0.82455151
  0.67500000  -0.82455261
  0.67500000  -0.82455372
  0.67500000  -0.82455482
  0.67500000  -0.82455592
  0.67500000  -0.82455701
  0.67500000  -0.82455811
  0.67500000  -0.82455920
  0.67500000  -0.82456029
  0.67500000  -0.82456138
  0.67500000  -0.82456247
  0.67500000  -0.82456356
  0.67500000  -0.82456464
  0.67500000  -0.82456572
  0.67550000  -0.82453036
  0.67550000  -0.82453151
  0.67550000  -0.82453266
  0.67550000  -0.82453381
  0.67550000  -0.82453495
  0.67550000  -0.82453609
  0.67550000  -0.82453724
  0.67550000  -0.82453837
  0.67550000  -0.82453951
  0.67550000  -0.82454064
  0.67550000  -0.82454178
  0.67550000  -0.82454291
  0.67550000  -0.82454404
  0.67550000  -0.82454516
  0.67550000  -0.82454629
  0.67550000  -0.82454741
  0.67550000  -0.82454853
  0.67550000  -0.82454965
  0.67550000  -0.82455077
  0.67550000  -0.82455188
  0.67550000  -0.82455300
  0.67550000  -0.82455411
  0.67550000  -0.82455522
  0.67550000  -0.82455632
  0.67550000  -0.82455743
  0.67550000  -0.82455853
  0.67550000  -0.82455963
  0.67550000  -0.82456073
  0.67550000  -0.82456183
  0.67550000  -0.82456293
  0.67550000  -0.82456402
  0.67550000  -0.82456511
  0.67550000  -0.82456621
  0.67550000  -0.82456729
  0.67550000  -0.82456838
  0.67550000  -0.82456947
  0.67550000  -0.82457055
  0.67550000  -0.82457163
  0.67550000  -0.82457271
  0.67550000  -0.82457379
  0.67600000  -0.82453858
  0.67600000  -0.82453972
  0.67600000  -0.82454087
  0.67600000  -0.82454201
  0.67600000  -0.82454315
  0.67600000  -0.82454428
  0.67600000  -0.82454542
  0.67600000  -0.82454655
  0.67600000  -0.82454769
  0.67600000  -0.82454881
  0.67600000  -0.82454994
  0.67600000  -0.82455107
  0.67600000  -0.82455219
  0.67600000  -0.82455331
  0.67600000  -0.82455443
  0.67600000  -0.82455555
  0.67600000  -0.82455667
  0.67600000  -0.82455778
  0.67600000  -0.82455889
  0.67600000  -0.82456000
  0.67600000  -0.82456111
  0.67600000  -0.82456222
  0.67600000  -0.82456332
  0.67600000  -0.82456443
  0.67600000  -0.82456553
  0.67600000  -0.82456663
  0.67600000  -0.82456772
  0.67600000  -0.82456882
  0.67600000  -0.82456991
  0.67600000  -0.82457100
  0.67600000  -0.82457209
  0.67600000  -0.82457318
  0.67600000  -0.82457427
  0.67600000  -0.82457535
  0.67600000  -0.82457643
  0.67600000  -0.82457751
  0.67600000  -0.82457859
  0.67600000  -0.82457967
  0.67600000  -0.82458074
  0.67600000  -0.82458181
  0.67650000  -0.82454675
  0.67650000  -0.82454790
  0.67650000  -0.82454903
  0.67650000  -0.82455017
  0.67650000  -0.82455130
  0.67650000  -0.82455244
  0.67650000  -0.82455357
  0.67650000  -0.82455470
  0.67650000  -0.82455582
  0.67650000  -0.82455695
  0.67650000  -0.82455807
  0.67650000  -0.82455919
  0.67650000  -0.82456031
  0.67650000  -0.82456143
  0.67650000  -0.82456254
  0.67650000  -0.82456366
  0.67650000  -0.82456477
  0.67650000  -0.82456588
  0.67650000  -0.82456698
  0.67650000  -0.82456809
  0.67650000  -0.82456919
  0.67650000  -0.82457029
  0.67650000  -0.82457139
  0.67650000  -0.82457249
  0.67650000  -0.82457359
  0.67650000  -0.82457468
  0.67650000  -0.82457577
  0.67650000  -0.82457686
  0.67650000  -0.82457795
  0.67650000  -0.82457904
  0.67650000  -0.82458012
  0.67650000  -0.82458121
  0.67650000  -0.82458229
  0.67650000  -0.82458337
  0.67650000  -0.82458444
  0.67650000  -0.82458552
  0.67650000  -0.82458659
  0.67650000  -0.82458767
  0.67650000  -0.82458874
  0.67650000  -0.82458980
  0.67700000  -0.82455489
  0.67700000  -0.82455603
  0.67700000  -0.82455716
  0.67700000  -0.82455830
  0.67700000  -0.82455943
  0.67700000  -0.82456055
  0.67700000  -0.82456168
  0.67700000  -0.82456280
  0.67700000  -0.82456392
  0.67700000  -0.82456504
  0.67700000  -0.82456616
  0.67700000  -0.82456728
  0.67700000  -0.82456839
  0.67700000  -0.82456950
  0.67700000  -0.82457061
  0.67700000  -0.82457172
  0.67700000  -0.82457283
  0.67700000  -0.82457393
  0.67700000  -0.82457504
  0.67700000  -0.82457614
  0.67700000  -0.82457724
  0.67700000  -0.82457833
  0.67700000  -0.82457943
  0.67700000  -0.82458052
  0.67700000  -0.82458161
  0.67700000  -0.82458270
  0.67700000  -0.82458379
  0.67700000  -0.82458487
  0.67700000  -0.82458596
  0.67700000  -0.82458704
  0.67700000  -0.82458812
  0.67700000  -0.82458920
  0.67700000  -0.82459027
  0.67700000  -0.82459135
  0.67700000  -0.82459242
  0.67700000  -0.82459349
  0.67700000  -0.82459456
  0.67700000  -0.82459563
  0.67700000  -0.82459669
  0.67700000  -0.82459776
  0.67750000  -0.82456300
  0.67750000  -0.82456413
  0.67750000  -0.82456526
  0.67750000  -0.82456638
  0.67750000  -0.82456751
  0.67750000  -0.82456863
  0.67750000  -0.82456975
  0.67750000  -0.82457087
  0.67750000  -0.82457199
  0.67750000  -0.82457310
  0.67750000  -0.82457422
  0.67750000  -0.82457533
  0.67750000  -0.82457644
  0.67750000  -0.82457754
  0.67750000  -0.82457865
  0.67750000  -0.82457975
  0.67750000  -0.82458085
  0.67750000  -0.82458195
  0.67750000  -0.82458305
  0.67750000  -0.82458415
  0.67750000  -0.82458524
  0.67750000  -0.82458633
  0.67750000  -0.82458742
  0.67750000  -0.82458851
  0.67750000  -0.82458960
  0.67750000  -0.82459068
  0.67750000  -0.82459177
  0.67750000  -0.82459285
  0.67750000  -0.82459393
  0.67750000  -0.82459500
  0.67750000  -0.82459608
  0.67750000  -0.82459715
  0.67750000  -0.82459822
  0.67750000  -0.82459929
  0.67750000  -0.82460036
  0.67750000  -0.82460143
  0.67750000  -0.82460249
  0.67750000  -0.82460356
  0.67750000  -0.82460462
  0.67750000  -0.82460568
  0.67800000  -0.82457106
  0.67800000  -0.82457219
  0.67800000  -0.82457331
  0.67800000  -0.82457444
  0.67800000  -0.82457556
  0.67800000  -0.82457667
  0.67800000  -0.82457779
  0.67800000  -0.82457890
  0.67800000  -0.82458002
  0.67800000  -0.82458113
  0.67800000  -0.82458223
  0.67800000  -0.82458334
  0.67800000  -0.82458445
  0.67800000  -0.82458555
  0.67800000  -0.82458665
  0.67800000  -0.82458775
  0.67800000  -0.82458884
  0.67800000  -0.82458994
  0.67800000  -0.82459103
  0.67800000  -0.82459212
  0.67800000  -0.82459321
  0.67800000  -0.82459430
  0.67800000  -0.82459538
  0.67800000  -0.82459647
  0.67800000  -0.82459755
  0.67800000  -0.82459863
  0.67800000  -0.82459971
  0.67800000  -0.82460078
  0.67800000  -0.82460186
  0.67800000  -0.82460293
  0.67800000  -0.82460400
  0.67800000  -0.82460507
  0.67800000  -0.82460614
  0.67800000  -0.82460720
  0.67800000  -0.82460827
  0.67800000  -0.82460933
  0.67800000  -0.82461039
  0.67800000  -0.82461145
  0.67800000  -0.82461250
  0.67800000  -0.82461356
  0.67850000  -0.82457909
  0.67850000  -0.82458022
  0.67850000  -0.82458133
  0.67850000  -0.82458245
  0.67850000  -0.82458357
  0.67850000  -0.82458468
  0.67850000  -0.82458579
  0.67850000  -0.82458690
  0.67850000  -0.82458801
  0.67850000  -0.82458911
  0.67850000  -0.82459022
  0.67850000  -0.82459132
  0.67850000  -0.82459242
  0.67850000  -0.82459351
  0.67850000  -0.82459461
  0.67850000  -0.82459570
  0.67850000  -0.82459680
  0.67850000  -0.82459789
  0.67850000  -0.82459897
  0.67850000  -0.82460006
  0.67850000  -0.82460115
  0.67850000  -0.82460223
  0.67850000  -0.82460331
  0.67850000  -0.82460439
  0.67850000  -0.82460546
  0.67850000  -0.82460654
  0.67850000  -0.82460761
  0.67850000  -0.82460868
  0.67850000  -0.82460975
  0.67850000  -0.82461082
  0.67850000  -0.82461189
  0.67850000  -0.82461295
  0.67850000  -0.82461402
  0.67850000  -0.82461508
  0.67850000  -0.82461613
  0.67850000  -0.82461719
  0.67850000  -0.82461825
  0.67850000  -0.82461930
  0.67850000  -0.82462035
  0.67850000  -0.82462140
  0.67900000  -0.82458709
  0.67900000  -0.82458820
  0.67900000  -0.82458932
  0.67900000  -0.82459043
  0.67900000  -0.82459154
  0.67900000  -0.82459265
  0.67900000  -0.82459375
  0.67900000  -0.82459486
  0.67900000  -0.82459596
  0.67900000  -0.82459706
  0.67900000  -0.82459816
  0.67900000  -0.82459926
  0.67900000  -0.82460035
  0.67900000  -0.82460145
  0.67900000  -0.82460254
  0.67900000  -0.82460363
  0.67900000  -0.82460471
  0.67900000  -0.82460580
  0.67900000  -0.82460688
  0.67900000  -0.82460796
  0.67900000  -0.82460904
  0.67900000  -0.82461012
  0.67900000  -0.82461120
  0.67900000  -0.82461227
  0.67900000  -0.82461334
  0.67900000  -0.82461441
  0.67900000  -0.82461548
  0.67900000  -0.82461655
  0.67900000  -0.82461761
  0.67900000  -0.82461868
  0.67900000  -0.82461974
  0.67900000  -0.82462080
  0.67900000  -0.82462186
  0.67900000  -0.82462291
  0.67900000  -0.82462397
  0.67900000  -0.82462502
  0.67900000  -0.82462607
  0.67900000  -0.82462712
  0.67900000  -0.82462817
  0.67900000  -0.82462921
  0.67950000  -0.82459504
  0.67950000  -0.82459616
  0.67950000  -0.82459727
  0.67950000  -0.82459837
  0.67950000  -0.82459948
  0.67950000  -0.82460058
  0.67950000  -0.82460168
  0.67950000  -0.82460278
  0.67950000  -0.82460388
  0.67950000  -0.82460498
  0.67950000  -0.82460607
  0.67950000  -0.82460716
  0.67950000  -0.82460825
  0.67950000  -0.82460934
  0.67950000  -0.82461043
  0.67950000  -0.82461151
  0.67950000  -0.82461259
  0.67950000  -0.82461367
  0.67950000  -0.82461475
  0.67950000  -0.82461583
  0.67950000  -0.82461690
  0.67950000  -0.82461798
  0.67950000  -0.82461905
  0.67950000  -0.82462012
  0.67950000  -0.82462119
  0.67950000  -0.82462225
  0.67950000  -0.82462332
  0.67950000  -0.82462438
  0.67950000  -0.82462544
  0.67950000  -0.82462650
  0.67950000  -0.82462755
  0.67950000  -0.82462861
  0.67950000  -0.82462966
  0.67950000  -0.82463071
  0.67950000  -0.82463176
  0.67950000  -0.82463281
  0.67950000  -0.82463386
  0.67950000  -0.82463490
  0.67950000  -0.82463594
  0.67950000  -0.82463699
  0.68000000  -0.82460297
  0.68000000  -0.82460407
  0.68000000  -0.82460518
  0.68000000  -0.82460628
  0.68000000  -0.82460738
  0.68000000  -0.82460848
  0.68000000  -0.82460957
  0.68000000  -0.82461067
  0.68000000  -0.82461176
  0.68000000  -0.82461285
  0.68000000  -0.82461394
  0.68000000  -0.82461503
  0.68000000  -0.82461612
  0.68000000  -0.82461720
  0.68000000  -0.82461828
  0.68000000  -0.82461936
  0.68000000  -0.82462044
  0.68000000  -0.82462151
  0.68000000  -0.82462259
  0.68000000  -0.82462366
  0.68000000  -0.82462473
  0.68000000  -0.82462580
  0.68000000  -0.82462687
  0.68000000  -0.82462793
  0.68000000  -0.82462899
  0.68000000  -0.82463005
  0.68000000  -0.82463111
  0.68000000  -0.82463217
  0.68000000  -0.82463323
  0.68000000  -0.82463428
  0.68000000  -0.82463533
  0.68000000  -0.82463638
  0.68000000  -0.82463743
  0.68000000  -0.82463848
  0.68000000  -0.82463953
  0.68000000  -0.82464057
  0.68000000  -0.82464161
  0.68000000  -0.82464265
  0.68000000  -0.82464369
  0.68000000  -0.82464472
  0.68050000  -0.82461085
  0.68050000  -0.82461195
  0.68050000  -0.82461305
  0.68050000  -0.82461415
  0.68050000  -0.82461525
  0.68050000  -0.82461634
  0.68050000  -0.82461743
  0.68050000  -0.82461852
  0.68050000  -0.82461961
  0.68050000  -0.82462070
  0.68050000  -0.82462178
  0.68050000  -0.82462286
  0.68050000  -0.82462394
  0.68050000  -0.82462502
  0.68050000  -0.82462610
  0.68050000  -0.82462717
  0.68050000  -0.82462825
  0.68050000  -0.82462932
  0.68050000  -0.82463039
  0.68050000  -0.82463145
  0.68050000  -0.82463252
  0.68050000  -0.82463358
  0.68050000  -0.82463465
  0.68050000  -0.82463571
  0.68050000  -0.82463677
  0.68050000  -0.82463782
  0.68050000  -0.82463888
  0.68050000  -0.82463993
  0.68050000  -0.82464098
  0.68050000  -0.82464203
  0.68050000  -0.82464308
  0.68050000  -0.82464412
  0.68050000  -0.82464517
  0.68050000  -0.82464621
  0.68050000  -0.82464725
  0.68050000  -0.82464829
  0.68050000  -0.82464933
  0.68050000  -0.82465036
  0.68050000  -0.82465140
  0.68050000  -0.82465243
  0.68100000  -0.82461870
  0.68100000  -0.82461980
  0.68100000  -0.82462089
  0.68100000  -0.82462198
  0.68100000  -0.82462308
  0.68100000  -0.82462416
  0.68100000  -0.82462525
  0.68100000  -0.82462634
  0.68100000  -0.82462742
  0.68100000  -0.82462850
  0.68100000  -0.82462958
  0.68100000  -0.82463066
  0.68100000  -0.82463173
  0.68100000  -0.82463281
  0.68100000  -0.82463388
  0.68100000  -0.82463495
  0.68100000  -0.82463602
  0.68100000  -0.82463709
  0.68100000  -0.82463815
  0.68100000  -0.82463921
  0.68100000  -0.82464028
  0.68100000  -0.82464133
  0.68100000  -0.82464239
  0.68100000  -0.82464345
  0.68100000  -0.82464450
  0.68100000  -0.82464555
  0.68100000  -0.82464660
  0.68100000  -0.82464765
  0.68100000  -0.82464870
  0.68100000  -0.82464974
  0.68100000  -0.82465079
  0.68100000  -0.82465183
  0.68100000  -0.82465287
  0.68100000  -0.82465391
  0.68100000  -0.82465494
  0.68100000  -0.82465598
  0.68100000  -0.82465701
  0.68100000  -0.82465804
  0.68100000  -0.82465907
  0.68100000  -0.82466009
  0.68150000  -0.82462651
  0.68150000  -0.82462760
  0.68150000  -0.82462869
  0.68150000  -0.82462978
  0.68150000  -0.82463087
  0.68150000  -0.82463195
  0.68150000  -0.82463304
  0.68150000  -0.82463412
  0.68150000  -0.82463520
  0.68150000  -0.82463627
  0.68150000  -0.82463735
  0.68150000  -0.82463842
  0.68150000  -0.82463949
  0.68150000  -0.82464056
  0.68150000  -0.82464163
  0.68150000  -0.82464269
  0.68150000  -0.82464376
  0.68150000  -0.82464482
  0.68150000  -0.82464588
  0.68150000  -0.82464694
  0.68150000  -0.82464799
  0.68150000  -0.82464905
  0.68150000  -0.82465010
  0.68150000  -0.82465115
  0.68150000  -0.82465220
  0.68150000  -0.82465325
  0.68150000  -0.82465430
  0.68150000  -0.82465534
  0.68150000  -0.82465638
  0.68150000  -0.82465742
  0.68150000  -0.82465846
  0.68150000  -0.82465950
  0.68150000  -0.82466053
  0.68150000  -0.82466156
  0.68150000  -0.82466260
  0.68150000  -0.82466363
  0.68150000  -0.82466465
  0.68150000  -0.82466568
  0.68150000  -0.82466670
  0.68150000  -0.82466773
  0.68200000  -0.82463429
  0.68200000  -0.82463538
  0.68200000  -0.82463646
  0.68200000  -0.82463755
  0.68200000  -0.82463863
  0.68200000  -0.82463971
  0.68200000  -0.82464079
  0.68200000  -0.82464186
  0.68200000  -0.82464294
  0.68200000  -0.82464401
  0.68200000  -0.82464508
  0.68200000  -0.82464615
  0.68200000  -0.82464721
  0.68200000  -0.82464828
  0.68200000  -0.82464934
  0.68200000  -0.82465040
  0.68200000  -0.82465146
  0.68200000  -0.82465252
  0.68200000  -0.82465357
  0.68200000  -0.82465463
  0.68200000  -0.82465568
  0.68200000  -0.82465673
  0.68200000  -0.82465778
  0.68200000  -0.82465882
  0.68200000  -0.82465987
  0.68200000  -0.82466091
  0.68200000  -0.82466195
  0.68200000  -0.82466299
  0.68200000  -0.82466403
  0.68200000  -0.82466506
  0.68200000  -0.82466610
  0.68200000  -0.82466713
  0.68200000  -0.82466816
  0.68200000  -0.82466919
  0.68200000  -0.82467022
  0.68200000  -0.82467124
  0.68200000  -0.82467227
  0.68200000  -0.82467329
  0.68200000  -0.82467431
  0.68200000  -0.82467533
  0.68250000  -0.82464203
  0.68250000  -0.82464312
  0.68250000  -0.82464420
  0.68250000  -0.82464527
  0.68250000  -0.82464635
  0.68250000  -0.82464743
  0.68250000  -0.82464850
  0.68250000  -0.82464957
  0.68250000  -0.82465064
  0.68250000  -0.82465171
  0.68250000  -0.82465277
  0.68250000  -0.82465384
  0.68250000  -0.82465490
  0.68250000  -0.82465596
  0.68250000  -0.82465702
  0.68250000  -0.82465807
  0.68250000  -0.82465913
  0.68250000  -0.82466018
  0.68250000  -0.82466123
  0.68250000  -0.82466228
  0.68250000  -0.82466333
  0.68250000  -0.82466437
  0.68250000  -0.82466542
  0.68250000  -0.82466646
  0.68250000  -0.82466750
  0.68250000  -0.82466854
  0.68250000  -0.82466957
  0.68250000  -0.82467061
  0.68250000  -0.82467164
  0.68250000  -0.82467267
  0.68250000  -0.82467370
  0.68250000  -0.82467473
  0.68250000  -0.82467576
  0.68250000  -0.82467678
  0.68250000  -0.82467780
  0.68250000  -0.82467882
  0.68250000  -0.82467984
  0.68250000  -0.82468086
  0.68250000  -0.82468187
  0.68250000  -0.82468289
  0.68300000  -0.82464974
  0.68300000  -0.82465082
  0.68300000  -0.82465189
  0.68300000  -0.82465297
  0.68300000  -0.82465404
  0.68300000  -0.82465511
  0.68300000  -0.82465618
  0.68300000  -0.82465724
  0.68300000  -0.82465831
  0.68300000  -0.82465937
  0.68300000  -0.82466043
  0.68300000  -0.82466149
  0.68300000  -0.82466255
  0.68300000  -0.82466360
  0.68300000  -0.82466466
  0.68300000  -0.82466571
  0.68300000  -0.82466676
  0.68300000  -0.82466781
  0.68300000  -0.82466885
  0.68300000  -0.82466990
  0.68300000  -0.82467094
  0.68300000  -0.82467198
  0.68300000  -0.82467302
  0.68300000  -0.82467406
  0.68300000  -0.82467509
  0.68300000  -0.82467613
  0.68300000  -0.82467716
  0.68300000  -0.82467819
  0.68300000  -0.82467922
  0.68300000  -0.82468025
  0.68300000  -0.82468127
  0.68300000  -0.82468229
  0.68300000  -0.82468332
  0.68300000  -0.82468433
  0.68300000  -0.82468535
  0.68300000  -0.82468637
  0.68300000  -0.82468738
  0.68300000  -0.82468840
  0.68300000  -0.82468941
  0.68300000  -0.82469042
  0.68350000  -0.82465741
  0.68350000  -0.82465848
  0.68350000  -0.82465956
  0.68350000  -0.82466063
  0.68350000  -0.82466169
  0.68350000  -0.82466276
  0.68350000  -0.82466382
  0.68350000  -0.82466488
  0.68350000  -0.82466594
  0.68350000  -0.82466700
  0.68350000  -0.82466806
  0.68350000  -0.82466911
  0.68350000  -0.82467017
  0.68350000  -0.82467122
  0.68350000  -0.82467227
  0.68350000  -0.82467331
  0.68350000  -0.82467436
  0.68350000  -0.82467540
  0.68350000  -0.82467644
  0.68350000  -0.82467748
  0.68350000  -0.82467852
  0.68350000  -0.82467956
  0.68350000  -0.82468059
  0.68350000  -0.82468162
  0.68350000  -0.82468266
  0.68350000  -0.82468368
  0.68350000  -0.82468471
  0.68350000  -0.82468574
  0.68350000  -0.82468676
  0.68350000  -0.82468778
  0.68350000  -0.82468880
  0.68350000  -0.82468982
  0.68350000  -0.82469084
  0.68350000  -0.82469186
  0.68350000  -0.82469287
  0.68350000  -0.82469388
  0.68350000  -0.82469489
  0.68350000  -0.82469590
  0.68350000  -0.82469691
  0.68350000  -0.82469791
  0.68400000  -0.82466505
  0.68400000  -0.82466612
  0.68400000  -0.82466718
  0.68400000  -0.82466825
  0.68400000  -0.82466931
  0.68400000  -0.82467037
  0.68400000  -0.82467143
  0.68400000  -0.82467249
  0.68400000  -0.82467354
  0.68400000  -0.82467460
  0.68400000  -0.82467565
  0.68400000  -0.82467670
  0.68400000  -0.82467775
  0.68400000  -0.82467879
  0.68400000  -0.82467984
  0.68400000  -0.82468088
  0.68400000  -0.82468192
  0.68400000  -0.82468296
  0.68400000  -0.82468400
  0.68400000  -0.82468503
  0.68400000  -0.82468607
  0.68400000  -0.82468710
  0.68400000  -0.82468813
  0.68400000  -0.82468916
  0.68400000  -0.82469018
  0.68400000  -0.82469121
  0.68400000  -0.82469223
  0.68400000  -0.82469325
  0.68400000  -0.82469427
  0.68400000  -0.82469529
  0.68400000  -0.82469630
  0.68400000  -0.82469732
  0.68400000  -0.82469833
  0.68400000  -0.82469934
  0.68400000  -0.82470035
  0.68400000  -0.82470136
  0.68400000  -0.82470236
  0.68400000  -0.82470337
  0.68400000  -0.82470437
  0.68400000  -0.82470537
  0.68450000  -0.82467265
  0.68450000  -0.82467371
  0.68450000  -0.82467478
  0.68450000  -0.82467584
  0.68450000  -0.82467689
  0.68450000  -0.82467795
  0.68450000  -0.82467901
  0.68450000  -0.82468006
  0.68450000  -0.82468111
  0.68450000  -0.82468216
  0.68450000  -0.82468320
  0.68450000  -0.82468425
  0.68450000  -0.82468529
  0.68450000  -0.82468633
  0.68450000  -0.82468737
  0.68450000  -0.82468841
  0.68450000  -0.82468945
  0.68450000  -0.82469048
  0.68450000  -0.82469152
  0.68450000  -0.82469255
  0.68450000  -0.82469358
  0.68450000  -0.82469460
  0.68450000  -0.82469563
  0.68450000  -0.82469665
  0.68450000  -0.82469767
  0.68450000  -0.82469869
  0.68450000  -0.82469971
  0.68450000  -0.82470073
  0.68450000  -0.82470174
  0.68450000  -0.82470276
  0.68450000  -0.82470377
  0.68450000  -0.82470478
  0.68450000  -0.82470579
  0.68450000  -0.82470679
  0.68450000  -0.82470780
  0.68450000  -0.82470880
  0.68450000  -0.82470980
  0.68450000  -0.82471080
  0.68450000  -0.82471180
  0.68450000  -0.82471280
  0.68500000  -0.82468022
  0.68500000  -0.82468128
  0.68500000  -0.82468233
  0.68500000  -0.82468339
  0.68500000  -0.82468444
  0.68500000  -0.82468550
  0.68500000  -0.82468654
  0.68500000  -0.82468759
  0.68500000  -0.82468864
  0.68500000  -0.82468968
  0.68500000  -0.82469073
  0.68500000  -0.82469177
  0.68500000  -0.82469281
  0.68500000  -0.82469384
  0.68500000  -0.82469488
  0.68500000  -0.82469591
  0.68500000  -0.82469694
  0.68500000  -0.82469797
  0.68500000  -0.82469900
  0.68500000  -0.82470003
  0.68500000  -0.82470105
  0.68500000  -0.82470207
  0.68500000  -0.82470310
  0.68500000  -0.82470411
  0.68500000  -0.82470513
  0.68500000  -0.82470615
  0.68500000  -0.82470716
  0.68500000  -0.82470817
  0.68500000  -0.82470918
  0.68500000  -0.82471019
  0.68500000  -0.82471120
  0.68500000  -0.82471221
  0.68500000  -0.82471321
  0.68500000  -0.82471421
  0.68500000  -0.82471521
  0.68500000  -0.82471621
  0.68500000  -0.82471721
  0.68500000  -0.82471820
  0.68500000  -0.82471920
  0.68500000  -0.82472019
  0.68550000  -0.82468775
  0.68550000  -0.82468881
  0.68550000  -0.82468986
  0.68550000  -0.82469091
  0.68550000  -0.82469196
  0.68550000  -0.82469300
  0.68550000  -0.82469405
  0.68550000  -0.82469509
  0.68550000  -0.82469614
  0.68550000  -0.82469717
  0.68550000  -0.82469821
  0.68550000  -0.82469925
  0.68550000  -0.82470028
  0.68550000  -0.82470132
  0.68550000  -0.82470235
  0.68550000  -0.82470338
  0.68550000  -0.82470440
  0.68550000  -0.82470543
  0.68550000  -0.82470645
  0.68550000  -0.82470747
  0.68550000  -0.82470849
  0.68550000  -0.82470951
  0.68550000  -0.82471053
  0.68550000  -0.82471154
[truncated: 654,577 more chars]
