# Supplementary material for: A Fractional-Order Discrete Noninvertible Map of Cubic Type: Dynamics, Control, and Synchronization
Source: Hindawi journal article supplement (doi:10.1155/2020/2935192), 2020-05-22
Supplement: f1 [file 2935192.f1.zip › 2935192.f1/discretesanweiqIN2.dat]

  0.50000000   0.82306999
  0.50000000   0.82307161
  0.50000000   0.82307323
  0.50000000   0.82307485
  0.50000000   0.82307646
  0.50000000   0.82307807
  0.50000000   0.82307968
  0.50000000   0.82308129
  0.50000000   0.82308289
  0.50000000   0.82308449
  0.50000000   0.82308609
  0.50000000   0.82308769
  0.50000000   0.82308928
  0.50000000   0.82309087
  0.50000000   0.82309246
  0.50000000   0.82309405
  0.50000000   0.82309563
  0.50000000   0.82309722
  0.50000000   0.82309880
  0.50000000   0.82310037
  0.50000000   0.82310195
  0.50000000   0.82310352
  0.50000000   0.82310509
  0.50000000   0.82310665
  0.50000000   0.82310822
  0.50000000   0.82310978
  0.50000000   0.82311134
  0.50000000   0.82311290
  0.50000000   0.82311445
  0.50000000   0.82311601
  0.50000000   0.82311756
  0.50000000   0.82311910
  0.50000000   0.82312065
  0.50000000   0.82312219
  0.50000000   0.82312373
  0.50000000   0.82312527
  0.50000000   0.82312681
  0.50000000   0.82312834
  0.50000000   0.82312987
  0.50000000   0.82313140
  0.50050000   0.82308387
  0.50050000   0.82308548
  0.50050000   0.82308709
  0.50050000   0.82308870
  0.50050000   0.82309031
  0.50050000   0.82309192
  0.50050000   0.82309352
  0.50050000   0.82309512
  0.50050000   0.82309672
  0.50050000   0.82309832
  0.50050000   0.82309991
  0.50050000   0.82310150
  0.50050000   0.82310309
  0.50050000   0.82310467
  0.50050000   0.82310626
  0.50050000   0.82310784
  0.50050000   0.82310942
  0.50050000   0.82311099
  0.50050000   0.82311256
  0.50050000   0.82311414
  0.50050000   0.82311570
  0.50050000   0.82311727
  0.50050000   0.82311883
  0.50050000   0.82312040
  0.50050000   0.82312195
  0.50050000   0.82312351
  0.50050000   0.82312507
  0.50050000   0.82312662
  0.50050000   0.82312817
  0.50050000   0.82312971
  0.50050000   0.82313126
  0.50050000   0.82313280
  0.50050000   0.82313434
  0.50050000   0.82313588
  0.50050000   0.82313741
  0.50050000   0.82313895
  0.50050000   0.82314048
  0.50050000   0.82314201
  0.50050000   0.82314353
  0.50050000   0.82314506
  0.50100000   0.82309768
  0.50100000   0.82309929
  0.50100000   0.82310090
  0.50100000   0.82310250
  0.50100000   0.82310410
  0.50100000   0.82310570
  0.50100000   0.82310730
  0.50100000   0.82310889
  0.50100000   0.82311049
  0.50100000   0.82311208
  0.50100000   0.82311366
  0.50100000   0.82311525
  0.50100000   0.82311683
  0.50100000   0.82311841
  0.50100000   0.82311999
  0.50100000   0.82312156
  0.50100000   0.82312314
  0.50100000   0.82312471
  0.50100000   0.82312627
  0.50100000   0.82312784
  0.50100000   0.82312940
  0.50100000   0.82313096
  0.50100000   0.82313252
  0.50100000   0.82313408
  0.50100000   0.82313563
  0.50100000   0.82313718
  0.50100000   0.82313873
  0.50100000   0.82314028
  0.50100000   0.82314182
  0.50100000   0.82314336
  0.50100000   0.82314490
  0.50100000   0.82314644
  0.50100000   0.82314797
  0.50100000   0.82314951
  0.50100000   0.82315104
  0.50100000   0.82315256
  0.50100000   0.82315409
  0.50100000   0.82315561
  0.50100000   0.82315713
  0.50100000   0.82315865
  0.50150000   0.82311143
  0.50150000   0.82311304
  0.50150000   0.82311464
  0.50150000   0.82311624
  0.50150000   0.82311783
  0.50150000   0.82311943
  0.50150000   0.82312102
  0.50150000   0.82312261
  0.50150000   0.82312419
  0.50150000   0.82312578
  0.50150000   0.82312736
  0.50150000   0.82312894
  0.50150000   0.82313052
  0.50150000   0.82313209
  0.50150000   0.82313366
  0.50150000   0.82313523
  0.50150000   0.82313680
  0.50150000   0.82313836
  0.50150000   0.82313993
  0.50150000   0.82314149
  0.50150000   0.82314304
  0.50150000   0.82314460
  0.50150000   0.82314615
  0.50150000   0.82314770
  0.50150000   0.82314925
  0.50150000   0.82315079
  0.50150000   0.82315234
  0.50150000   0.82315388
  0.50150000   0.82315542
  0.50150000   0.82315695
  0.50150000   0.82315849
  0.50150000   0.82316002
  0.50150000   0.82316155
  0.50150000   0.82316307
  0.50150000   0.82316460
  0.50150000   0.82316612
  0.50150000   0.82316764
  0.50150000   0.82316916
  0.50150000   0.82317067
  0.50150000   0.82317218
  0.50200000   0.82312513
  0.50200000   0.82312672
  0.50200000   0.82312832
  0.50200000   0.82312991
  0.50200000   0.82313150
  0.50200000   0.82313309
  0.50200000   0.82313468
  0.50200000   0.82313626
  0.50200000   0.82313784
  0.50200000   0.82313942
  0.50200000   0.82314100
  0.50200000   0.82314257
  0.50200000   0.82314414
  0.50200000   0.82314571
  0.50200000   0.82314728
  0.50200000   0.82314884
  0.50200000   0.82315040
  0.50200000   0.82315196
  0.50200000   0.82315352
  0.50200000   0.82315507
  0.50200000   0.82315662
  0.50200000   0.82315817
  0.50200000   0.82315972
  0.50200000   0.82316126
  0.50200000   0.82316281
  0.50200000   0.82316435
  0.50200000   0.82316588
  0.50200000   0.82316742
  0.50200000   0.82316895
  0.50200000   0.82317048
  0.50200000   0.82317201
  0.50200000   0.82317354
  0.50200000   0.82317506
  0.50200000   0.82317658
  0.50200000   0.82317810
  0.50200000   0.82317962
  0.50200000   0.82318113
  0.50200000   0.82318264
  0.50200000   0.82318415
  0.50200000   0.82318566
  0.50250000   0.82313876
  0.50250000   0.82314035
  0.50250000   0.82314194
  0.50250000   0.82314353
  0.50250000   0.82314512
  0.50250000   0.82314670
  0.50250000   0.82314828
  0.50250000   0.82314986
  0.50250000   0.82315143
  0.50250000   0.82315300
  0.50250000   0.82315458
  0.50250000   0.82315614
  0.50250000   0.82315771
  0.50250000   0.82315927
  0.50250000   0.82316083
  0.50250000   0.82316239
  0.50250000   0.82316395
  0.50250000   0.82316550
  0.50250000   0.82316705
  0.50250000   0.82316860
  0.50250000   0.82317015
  0.50250000   0.82317169
  0.50250000   0.82317323
  0.50250000   0.82317477
  0.50250000   0.82317631
  0.50250000   0.82317784
  0.50250000   0.82317937
  0.50250000   0.82318090
  0.50250000   0.82318243
  0.50250000   0.82318396
  0.50250000   0.82318548
  0.50250000   0.82318700
  0.50250000   0.82318852
  0.50250000   0.82319003
  0.50250000   0.82319155
  0.50250000   0.82319306
  0.50250000   0.82319457
  0.50250000   0.82319607
  0.50250000   0.82319758
  0.50250000   0.82319908
  0.50300000   0.82315234
  0.50300000   0.82315392
  0.50300000   0.82315551
  0.50300000   0.82315709
  0.50300000   0.82315867
  0.50300000   0.82316025
  0.50300000   0.82316182
  0.50300000   0.82316339
  0.50300000   0.82316496
  0.50300000   0.82316653
  0.50300000   0.82316809
  0.50300000   0.82316966
  0.50300000   0.82317122
  0.50300000   0.82317277
  0.50300000   0.82317433
  0.50300000   0.82317588
  0.50300000   0.82317743
  0.50300000   0.82317898
  0.50300000   0.82318053
  0.50300000   0.82318207
  0.50300000   0.82318361
  0.50300000   0.82318515
  0.50300000   0.82318668
  0.50300000   0.82318822
  0.50300000   0.82318975
  0.50300000   0.82319128
  0.50300000   0.82319280
  0.50300000   0.82319433
  0.50300000   0.82319585
  0.50300000   0.82319737
  0.50300000   0.82319889
  0.50300000   0.82320040
  0.50300000   0.82320191
  0.50300000   0.82320342
  0.50300000   0.82320493
  0.50300000   0.82320644
  0.50300000   0.82320794
  0.50300000   0.82320944
  0.50300000   0.82321094
  0.50300000   0.82321244
  0.50350000   0.82316585
  0.50350000   0.82316744
  0.50350000   0.82316901
  0.50350000   0.82317059
  0.50350000   0.82317216
  0.50350000   0.82317374
  0.50350000   0.82317530
  0.50350000   0.82317687
  0.50350000   0.82317843
  0.50350000   0.82318000
  0.50350000   0.82318156
  0.50350000   0.82318311
  0.50350000   0.82318467
  0.50350000   0.82318622
  0.50350000   0.82318777
  0.50350000   0.82318931
  0.50350000   0.82319086
  0.50350000   0.82319240
  0.50350000   0.82319394
  0.50350000   0.82319548
  0.50350000   0.82319701
  0.50350000   0.82319855
  0.50350000   0.82320008
  0.50350000   0.82320161
  0.50350000   0.82320313
  0.50350000   0.82320465
  0.50350000   0.82320618
  0.50350000   0.82320769
  0.50350000   0.82320921
  0.50350000   0.82321072
  0.50350000   0.82321224
  0.50350000   0.82321375
  0.50350000   0.82321525
  0.50350000   0.82321676
  0.50350000   0.82321826
  0.50350000   0.82321976
  0.50350000   0.82322126
  0.50350000   0.82322275
  0.50350000   0.82322425
  0.50350000   0.82322574
  0.50400000   0.82317931
  0.50400000   0.82318089
  0.50400000   0.82318246
  0.50400000   0.82318403
  0.50400000   0.82318560
  0.50400000   0.82318717
  0.50400000   0.82318873
  0.50400000   0.82319029
  0.50400000   0.82319185
  0.50400000   0.82319340
  0.50400000   0.82319496
  0.50400000   0.82319651
  0.50400000   0.82319806
  0.50400000   0.82319960
  0.50400000   0.82320115
  0.50400000   0.82320269
  0.50400000   0.82320423
  0.50400000   0.82320577
  0.50400000   0.82320730
  0.50400000   0.82320883
  0.50400000   0.82321036
  0.50400000   0.82321189
  0.50400000   0.82321341
  0.50400000   0.82321494
  0.50400000   0.82321646
  0.50400000   0.82321797
  0.50400000   0.82321949
  0.50400000   0.82322100
  0.50400000   0.82322251
  0.50400000   0.82322402
  0.50400000   0.82322553
  0.50400000   0.82322703
  0.50400000   0.82322853
  0.50400000   0.82323003
  0.50400000   0.82323153
  0.50400000   0.82323303
  0.50400000   0.82323452
  0.50400000   0.82323601
  0.50400000   0.82323750
  0.50400000   0.82323898
  0.50450000   0.82319271
  0.50450000   0.82319428
  0.50450000   0.82319585
  0.50450000   0.82319742
  0.50450000   0.82319898
  0.50450000   0.82320054
  0.50450000   0.82320210
  0.50450000   0.82320365
  0.50450000   0.82320520
  0.50450000   0.82320676
  0.50450000   0.82320830
  0.50450000   0.82320985
  0.50450000   0.82321139
  0.50450000   0.82321293
  0.50450000   0.82321447
  0.50450000   0.82321601
  0.50450000   0.82321754
  0.50450000   0.82321907
  0.50450000   0.82322060
  0.50450000   0.82322213
  0.50450000   0.82322365
  0.50450000   0.82322517
  0.50450000   0.82322669
  0.50450000   0.82322821
  0.50450000   0.82322972
  0.50450000   0.82323124
  0.50450000   0.82323275
  0.50450000   0.82323425
  0.50450000   0.82323576
  0.50450000   0.82323726
  0.50450000   0.82323876
  0.50450000   0.82324026
  0.50450000   0.82324176
  0.50450000   0.82324325
  0.50450000   0.82324474
  0.50450000   0.82324623
  0.50450000   0.82324772
  0.50450000   0.82324921
  0.50450000   0.82325069
  0.50450000   0.82325217
  0.50500000   0.82320606
  0.50500000   0.82320762
  0.50500000   0.82320918
  0.50500000   0.82321074
  0.50500000   0.82321230
  0.50500000   0.82321385
  0.50500000   0.82321541
  0.50500000   0.82321696
  0.50500000   0.82321850
  0.50500000   0.82322005
  0.50500000   0.82322159
  0.50500000   0.82322313
  0.50500000   0.82322467
  0.50500000   0.82322620
  0.50500000   0.82322774
  0.50500000   0.82322927
  0.50500000   0.82323079
  0.50500000   0.82323232
  0.50500000   0.82323384
  0.50500000   0.82323536
  0.50500000   0.82323688
  0.50500000   0.82323840
  0.50500000   0.82323991
  0.50500000   0.82324143
  0.50500000   0.82324293
  0.50500000   0.82324444
  0.50500000   0.82324595
  0.50500000   0.82324745
  0.50500000   0.82324895
  0.50500000   0.82325045
  0.50500000   0.82325194
  0.50500000   0.82325343
  0.50500000   0.82325493
  0.50500000   0.82325641
  0.50500000   0.82325790
  0.50500000   0.82325938
  0.50500000   0.82326087
  0.50500000   0.82326235
  0.50500000   0.82326382
  0.50500000   0.82326530
  0.50550000   0.82321934
  0.50550000   0.82322090
  0.50550000   0.82322246
  0.50550000   0.82322401
  0.50550000   0.82322556
  0.50550000   0.82322711
  0.50550000   0.82322866
  0.50550000   0.82323020
  0.50550000   0.82323174
  0.50550000   0.82323328
  0.50550000   0.82323482
  0.50550000   0.82323635
  0.50550000   0.82323789
  0.50550000   0.82323942
  0.50550000   0.82324094
  0.50550000   0.82324247
  0.50550000   0.82324399
  0.50550000   0.82324551
  0.50550000   0.82324703
  0.50550000   0.82324854
  0.50550000   0.82325006
  0.50550000   0.82325157
  0.50550000   0.82325308
  0.50550000   0.82325458
  0.50550000   0.82325609
  0.50550000   0.82325759
  0.50550000   0.82325909
  0.50550000   0.82326059
  0.50550000   0.82326208
  0.50550000   0.82326357
  0.50550000   0.82326506
  0.50550000   0.82326655
  0.50550000   0.82326804
  0.50550000   0.82326952
  0.50550000   0.82327100
  0.50550000   0.82327248
  0.50550000   0.82327395
  0.50550000   0.82327543
  0.50550000   0.82327690
  0.50550000   0.82327837
  0.50600000   0.82323257
  0.50600000   0.82323412
  0.50600000   0.82323568
  0.50600000   0.82323722
  0.50600000   0.82323877
  0.50600000   0.82324031
  0.50600000   0.82324185
  0.50600000   0.82324339
  0.50600000   0.82324493
  0.50600000   0.82324646
  0.50600000   0.82324799
  0.50600000   0.82324952
  0.50600000   0.82325105
  0.50600000   0.82325257
  0.50600000   0.82325409
  0.50600000   0.82325561
  0.50600000   0.82325713
  0.50600000   0.82325865
  0.50600000   0.82326016
  0.50600000   0.82326167
  0.50600000   0.82326318
  0.50600000   0.82326468
  0.50600000   0.82326618
  0.50600000   0.82326769
  0.50600000   0.82326918
  0.50600000   0.82327068
  0.50600000   0.82327217
  0.50600000   0.82327366
  0.50600000   0.82327515
  0.50600000   0.82327664
  0.50600000   0.82327813
  0.50600000   0.82327961
  0.50600000   0.82328109
  0.50600000   0.82328257
  0.50600000   0.82328404
  0.50600000   0.82328552
  0.50600000   0.82328699
  0.50600000   0.82328846
  0.50600000   0.82328992
  0.50600000   0.82329139
  0.50650000   0.82324574
  0.50650000   0.82324729
  0.50650000   0.82324884
  0.50650000   0.82325038
  0.50650000   0.82325192
  0.50650000   0.82325346
  0.50650000   0.82325499
  0.50650000   0.82325652
  0.50650000   0.82325805
  0.50650000   0.82325958
  0.50650000   0.82326111
  0.50650000   0.82326263
  0.50650000   0.82326415
  0.50650000   0.82326567
  0.50650000   0.82326719
  0.50650000   0.82326870
  0.50650000   0.82327021
  0.50650000   0.82327172
  0.50650000   0.82327323
  0.50650000   0.82327473
  0.50650000   0.82327624
  0.50650000   0.82327774
  0.50650000   0.82327923
  0.50650000   0.82328073
  0.50650000   0.82328222
  0.50650000   0.82328371
  0.50650000   0.82328520
  0.50650000   0.82328669
  0.50650000   0.82328817
  0.50650000   0.82328965
  0.50650000   0.82329113
  0.50650000   0.82329261
  0.50650000   0.82329409
  0.50650000   0.82329556
  0.50650000   0.82329703
  0.50650000   0.82329850
  0.50650000   0.82329996
  0.50650000   0.82330143
  0.50650000   0.82330289
  0.50650000   0.82330435
  0.50700000   0.82325886
  0.50700000   0.82326040
  0.50700000   0.82326194
  0.50700000   0.82326348
  0.50700000   0.82326501
  0.50700000   0.82326654
  0.50700000   0.82326807
  0.50700000   0.82326960
  0.50700000   0.82327112
  0.50700000   0.82327265
  0.50700000   0.82327417
  0.50700000   0.82327569
  0.50700000   0.82327720
  0.50700000   0.82327871
  0.50700000   0.82328023
  0.50700000   0.82328173
  0.50700000   0.82328324
  0.50700000   0.82328474
  0.50700000   0.82328625
  0.50700000   0.82328774
  0.50700000   0.82328924
  0.50700000   0.82329074
  0.50700000   0.82329223
  0.50700000   0.82329372
  0.50700000   0.82329521
  0.50700000   0.82329669
  0.50700000   0.82329817
  0.50700000   0.82329966
  0.50700000   0.82330113
  0.50700000   0.82330261
  0.50700000   0.82330408
  0.50700000   0.82330556
  0.50700000   0.82330703
  0.50700000   0.82330849
  0.50700000   0.82330996
  0.50700000   0.82331142
  0.50700000   0.82331288
  0.50700000   0.82331434
  0.50700000   0.82331580
  0.50700000   0.82331725
  0.50750000   0.82327191
  0.50750000   0.82327345
  0.50750000   0.82327499
  0.50750000   0.82327652
  0.50750000   0.82327805
  0.50750000   0.82327957
  0.50750000   0.82328110
  0.50750000   0.82328262
  0.50750000   0.82328414
  0.50750000   0.82328566
  0.50750000   0.82328717
  0.50750000   0.82328868
  0.50750000   0.82329019
  0.50750000   0.82329170
  0.50750000   0.82329321
  0.50750000   0.82329471
  0.50750000   0.82329621
  0.50750000   0.82329771
  0.50750000   0.82329920
  0.50750000   0.82330070
  0.50750000   0.82330219
  0.50750000   0.82330368
  0.50750000   0.82330517
  0.50750000   0.82330665
  0.50750000   0.82330813
  0.50750000   0.82330961
  0.50750000   0.82331109
  0.50750000   0.82331257
  0.50750000   0.82331404
  0.50750000   0.82331551
  0.50750000   0.82331698
  0.50750000   0.82331845
  0.50750000   0.82331991
  0.50750000   0.82332137
  0.50750000   0.82332283
  0.50750000   0.82332429
  0.50750000   0.82332574
  0.50750000   0.82332720
  0.50750000   0.82332865
  0.50750000   0.82333010
  0.50800000   0.82328492
  0.50800000   0.82328645
  0.50800000   0.82328798
  0.50800000   0.82328950
  0.50800000   0.82329103
  0.50800000   0.82329255
  0.50800000   0.82329407
  0.50800000   0.82329558
  0.50800000   0.82329710
  0.50800000   0.82329861
  0.50800000   0.82330012
  0.50800000   0.82330162
  0.50800000   0.82330313
  0.50800000   0.82330463
  0.50800000   0.82330613
  0.50800000   0.82330763
  0.50800000   0.82330912
  0.50800000   0.82331062
  0.50800000   0.82331211
  0.50800000   0.82331360
  0.50800000   0.82331508
  0.50800000   0.82331657
  0.50800000   0.82331805
  0.50800000   0.82331953
  0.50800000   0.82332100
  0.50800000   0.82332248
  0.50800000   0.82332395
  0.50800000   0.82332542
  0.50800000   0.82332689
  0.50800000   0.82332835
  0.50800000   0.82332982
  0.50800000   0.82333128
  0.50800000   0.82333274
  0.50800000   0.82333419
  0.50800000   0.82333565
  0.50800000   0.82333710
  0.50800000   0.82333855
  0.50800000   0.82334000
  0.50800000   0.82334144
  0.50800000   0.82334289
  0.50850000   0.82329786
  0.50850000   0.82329939
  0.50850000   0.82330091
  0.50850000   0.82330243
  0.50850000   0.82330395
  0.50850000   0.82330546
  0.50850000   0.82330698
  0.50850000   0.82330849
  0.50850000   0.82331000
  0.50850000   0.82331150
  0.50850000   0.82331301
  0.50850000   0.82331451
  0.50850000   0.82331601
  0.50850000   0.82331751
  0.50850000   0.82331900
  0.50850000   0.82332049
  0.50850000   0.82332198
  0.50850000   0.82332347
  0.50850000   0.82332496
  0.50850000   0.82332644
  0.50850000   0.82332792
  0.50850000   0.82332940
  0.50850000   0.82333087
  0.50850000   0.82333235
  0.50850000   0.82333382
  0.50850000   0.82333529
  0.50850000   0.82333676
  0.50850000   0.82333822
  0.50850000   0.82333968
  0.50850000   0.82334114
  0.50850000   0.82334260
  0.50850000   0.82334406
  0.50850000   0.82334551
  0.50850000   0.82334696
  0.50850000   0.82334841
  0.50850000   0.82334986
  0.50850000   0.82335130
  0.50850000   0.82335275
  0.50850000   0.82335419
  0.50850000   0.82335562
  0.50900000   0.82331075
  0.50900000   0.82331227
  0.50900000   0.82331379
  0.50900000   0.82331530
  0.50900000   0.82331682
  0.50900000   0.82331833
  0.50900000   0.82331983
  0.50900000   0.82332134
  0.50900000   0.82332284
  0.50900000   0.82332434
  0.50900000   0.82332584
  0.50900000   0.82332734
  0.50900000   0.82332883
  0.50900000   0.82333032
  0.50900000   0.82333181
  0.50900000   0.82333330
  0.50900000   0.82333478
  0.50900000   0.82333627
  0.50900000   0.82333775
  0.50900000   0.82333922
  0.50900000   0.82334070
  0.50900000   0.82334217
  0.50900000   0.82334364
  0.50900000   0.82334511
  0.50900000   0.82334658
  0.50900000   0.82334804
  0.50900000   0.82334950
  0.50900000   0.82335096
  0.50900000   0.82335242
  0.50900000   0.82335388
  0.50900000   0.82335533
  0.50900000   0.82335678
  0.50900000   0.82335823
  0.50900000   0.82335967
  0.50900000   0.82336112
  0.50900000   0.82336256
  0.50900000   0.82336400
  0.50900000   0.82336544
  0.50900000   0.82336687
  0.50900000   0.82336831
  0.50950000   0.82332359
  0.50950000   0.82332510
  0.50950000   0.82332661
  0.50950000   0.82332812
  0.50950000   0.82332963
  0.50950000   0.82333113
  0.50950000   0.82333264
  0.50950000   0.82333414
  0.50950000   0.82333563
  0.50950000   0.82333713
  0.50950000   0.82333862
  0.50950000   0.82334011
  0.50950000   0.82334160
  0.50950000   0.82334309
  0.50950000   0.82334457
  0.50950000   0.82334605
  0.50950000   0.82334753
  0.50950000   0.82334901
  0.50950000   0.82335048
  0.50950000   0.82335196
  0.50950000   0.82335343
  0.50950000   0.82335489
  0.50950000   0.82335636
  0.50950000   0.82335782
  0.50950000   0.82335928
  0.50950000   0.82336074
  0.50950000   0.82336220
  0.50950000   0.82336365
  0.50950000   0.82336510
  0.50950000   0.82336655
  0.50950000   0.82336800
  0.50950000   0.82336945
  0.50950000   0.82337089
  0.50950000   0.82337233
  0.50950000   0.82337377
  0.50950000   0.82337521
  0.50950000   0.82337664
  0.50950000   0.82337807
  0.50950000   0.82337950
  0.50950000   0.82338093
  0.51000000   0.82333636
  0.51000000   0.82333787
  0.51000000   0.82333938
  0.51000000   0.82334088
  0.51000000   0.82334239
  0.51000000   0.82334388
  0.51000000   0.82334538
  0.51000000   0.82334688
  0.51000000   0.82334837
  0.51000000   0.82334986
  0.51000000   0.82335135
  0.51000000   0.82335283
  0.51000000   0.82335431
  0.51000000   0.82335580
  0.51000000   0.82335727
  0.51000000   0.82335875
  0.51000000   0.82336022
  0.51000000   0.82336170
  0.51000000   0.82336316
  0.51000000   0.82336463
  0.51000000   0.82336610
  0.51000000   0.82336756
  0.51000000   0.82336902
  0.51000000   0.82337048
  0.51000000   0.82337193
  0.51000000   0.82337339
  0.51000000   0.82337484
  0.51000000   0.82337629
  0.51000000   0.82337773
  0.51000000   0.82337918
  0.51000000   0.82338062
  0.51000000   0.82338206
  0.51000000   0.82338350
  0.51000000   0.82338493
  0.51000000   0.82338637
  0.51000000   0.82338780
  0.51000000   0.82338923
  0.51000000   0.82339066
  0.51000000   0.82339208
  0.51000000   0.82339350
  0.51050000   0.82334909
  0.51050000   0.82335059
  0.51050000   0.82335209
  0.51050000   0.82335359
  0.51050000   0.82335509
  0.51050000   0.82335658
  0.51050000   0.82335807
  0.51050000   0.82335956
  0.51050000   0.82336105
  0.51050000   0.82336253
  0.51050000   0.82336402
  0.51050000   0.82336550
  0.51050000   0.82336697
  0.51050000   0.82336845
  0.51050000   0.82336992
  0.51050000   0.82337139
  0.51050000   0.82337286
  0.51050000   0.82337433
  0.51050000   0.82337579
  0.51050000   0.82337725
  0.51050000   0.82337871
  0.51050000   0.82338017
  0.51050000   0.82338162
  0.51050000   0.82338308
  0.51050000   0.82338453
  0.51050000   0.82338598
  0.51050000   0.82338742
  0.51050000   0.82338887
  0.51050000   0.82339031
  0.51050000   0.82339175
  0.51050000   0.82339318
  0.51050000   0.82339462
  0.51050000   0.82339605
  0.51050000   0.82339748
  0.51050000   0.82339891
  0.51050000   0.82340034
  0.51050000   0.82340176
  0.51050000   0.82340318
  0.51050000   0.82340460
  0.51050000   0.82340602
  0.51100000   0.82336176
  0.51100000   0.82336325
  0.51100000   0.82336475
  0.51100000   0.82336624
  0.51100000   0.82336773
  0.51100000   0.82336922
  0.51100000   0.82337071
  0.51100000   0.82337219
  0.51100000   0.82337367
  0.51100000   0.82337515
  0.51100000   0.82337663
  0.51100000   0.82337810
  0.51100000   0.82337958
  0.51100000   0.82338105
  0.51100000   0.82338252
  0.51100000   0.82338398
  0.51100000   0.82338544
  0.51100000   0.82338690
  0.51100000   0.82338836
  0.51100000   0.82338982
  0.51100000   0.82339127
  0.51100000   0.82339273
  0.51100000   0.82339418
  0.51100000   0.82339562
  0.51100000   0.82339707
  0.51100000   0.82339851
  0.51100000   0.82339995
  0.51100000   0.82340139
  0.51100000   0.82340283
  0.51100000   0.82340426
  0.51100000   0.82340569
  0.51100000   0.82340712
  0.51100000   0.82340855
  0.51100000   0.82340998
  0.51100000   0.82341140
  0.51100000   0.82341282
  0.51100000   0.82341424
  0.51100000   0.82341566
  0.51100000   0.82341707
  0.51100000   0.82341848
  0.51150000   0.82337437
  0.51150000   0.82337586
  0.51150000   0.82337735
  0.51150000   0.82337884
  0.51150000   0.82338033
  0.51150000   0.82338181
  0.51150000   0.82338329
  0.51150000   0.82338477
  0.51150000   0.82338624
  0.51150000   0.82338772
  0.51150000   0.82338919
  0.51150000   0.82339066
  0.51150000   0.82339213
  0.51150000   0.82339359
  0.51150000   0.82339505
  0.51150000   0.82339651
  0.51150000   0.82339797
  0.51150000   0.82339943
  0.51150000   0.82340088
  0.51150000   0.82340233
  0.51150000   0.82340378
  0.51150000   0.82340523
  0.51150000   0.82340667
  0.51150000   0.82340811
  0.51150000   0.82340955
  0.51150000   0.82341099
  0.51150000   0.82341243
  0.51150000   0.82341386
  0.51150000   0.82341529
  0.51150000   0.82341672
  0.51150000   0.82341815
  0.51150000   0.82341957
  0.51150000   0.82342099
  0.51150000   0.82342242
  0.51150000   0.82342383
  0.51150000   0.82342525
  0.51150000   0.82342666
  0.51150000   0.82342807
  0.51150000   0.82342948
  0.51150000   0.82343089
  0.51200000   0.82338693
  0.51200000   0.82338842
  0.51200000   0.82338990
  0.51200000   0.82339138
  0.51200000   0.82339286
  0.51200000   0.82339434
  0.51200000   0.82339582
  0.51200000   0.82339729
  0.51200000   0.82339876
  0.51200000   0.82340023
  0.51200000   0.82340170
  0.51200000   0.82340316
  0.51200000   0.82340462
  0.51200000   0.82340608
  0.51200000   0.82340754
  0.51200000   0.82340899
  0.51200000   0.82341045
  0.51200000   0.82341190
  0.51200000   0.82341334
  0.51200000   0.82341479
  0.51200000   0.82341623
  0.51200000   0.82341768
  0.51200000   0.82341911
  0.51200000   0.82342055
  0.51200000   0.82342199
  0.51200000   0.82342342
  0.51200000   0.82342485
  0.51200000   0.82342628
  0.51200000   0.82342770
  0.51200000   0.82342913
  0.51200000   0.82343055
  0.51200000   0.82343197
  0.51200000   0.82343339
  0.51200000   0.82343480
  0.51200000   0.82343621
  0.51200000   0.82343762
  0.51200000   0.82343903
  0.51200000   0.82344044
  0.51200000   0.82344184
  0.51200000   0.82344325
  0.51250000   0.82339943
  0.51250000   0.82340092
  0.51250000   0.82340240
  0.51250000   0.82340387
  0.51250000   0.82340535
  0.51250000   0.82340682
  0.51250000   0.82340829
  0.51250000   0.82340976
  0.51250000   0.82341122
  0.51250000   0.82341269
  0.51250000   0.82341415
  0.51250000   0.82341561
  0.51250000   0.82341706
  0.51250000   0.82341852
  0.51250000   0.82341997
  0.51250000   0.82342142
  0.51250000   0.82342287
  0.51250000   0.82342431
  0.51250000   0.82342575
  0.51250000   0.82342720
  0.51250000   0.82342863
  0.51250000   0.82343007
  0.51250000   0.82343150
  0.51250000   0.82343294
  0.51250000   0.82343437
  0.51250000   0.82343579
  0.51250000   0.82343722
  0.51250000   0.82343864
  0.51250000   0.82344006
  0.51250000   0.82344148
  0.51250000   0.82344290
  0.51250000   0.82344431
  0.51250000   0.82344572
  0.51250000   0.82344713
  0.51250000   0.82344854
  0.51250000   0.82344995
  0.51250000   0.82345135
  0.51250000   0.82345275
  0.51250000   0.82345415
  0.51250000   0.82345555
  0.51300000   0.82341188
  0.51300000   0.82341336
  0.51300000   0.82341484
  0.51300000   0.82341631
  0.51300000   0.82341778
  0.51300000   0.82341924
  0.51300000   0.82342071
  0.51300000   0.82342217
  0.51300000   0.82342363
  0.51300000   0.82342509
  0.51300000   0.82342655
  0.51300000   0.82342800
  0.51300000   0.82342945
  0.51300000   0.82343090
  0.51300000   0.82343235
  0.51300000   0.82343379
  0.51300000   0.82343523
  0.51300000   0.82343667
  0.51300000   0.82343811
  0.51300000   0.82343955
  0.51300000   0.82344098
  0.51300000   0.82344241
  0.51300000   0.82344384
  0.51300000   0.82344527
  0.51300000   0.82344669
  0.51300000   0.82344811
  0.51300000   0.82344953
  0.51300000   0.82345095
  0.51300000   0.82345237
  0.51300000   0.82345378
  0.51300000   0.82345519
  0.51300000   0.82345660
  0.51300000   0.82345801
  0.51300000   0.82345941
  0.51300000   0.82346081
  0.51300000   0.82346221
  0.51300000   0.82346361
  0.51300000   0.82346501
  0.51300000   0.82346640
  0.51300000   0.82346779
  0.51350000   0.82342428
  0.51350000   0.82342575
  0.51350000   0.82342722
  0.51350000   0.82342869
  0.51350000   0.82343015
  0.51350000   0.82343161
  0.51350000   0.82343307
  0.51350000   0.82343453
  0.51350000   0.82343599
  0.51350000   0.82343744
  0.51350000   0.82343889
  0.51350000   0.82344034
  0.51350000   0.82344178
  0.51350000   0.82344323
  0.51350000   0.82344467
  0.51350000   0.82344611
  0.51350000   0.82344755
  0.51350000   0.82344898
  0.51350000   0.82345041
  0.51350000   0.82345184
  0.51350000   0.82345327
  0.51350000   0.82345470
  0.51350000   0.82345612
  0.51350000   0.82345754
  0.51350000   0.82345896
  0.51350000   0.82346038
  0.51350000   0.82346179
  0.51350000   0.82346321
  0.51350000   0.82346462
  0.51350000   0.82346602
  0.51350000   0.82346743
  0.51350000   0.82346883
  0.51350000   0.82347024
  0.51350000   0.82347164
  0.51350000   0.82347303
  0.51350000   0.82347443
  0.51350000   0.82347582
  0.51350000   0.82347721
  0.51350000   0.82347860
  0.51350000   0.82347999
  0.51400000   0.82343663
  0.51400000   0.82343809
  0.51400000   0.82343956
  0.51400000   0.82344102
  0.51400000   0.82344248
  0.51400000   0.82344393
  0.51400000   0.82344539
  0.51400000   0.82344684
  0.51400000   0.82344829
  0.51400000   0.82344974
  0.51400000   0.82345118
  0.51400000   0.82345262
  0.51400000   0.82345407
  0.51400000   0.82345550
  0.51400000   0.82345694
  0.51400000   0.82345837
  0.51400000   0.82345981
  0.51400000   0.82346123
  0.51400000   0.82346266
  0.51400000   0.82346409
  0.51400000   0.82346551
  0.51400000   0.82346693
  0.51400000   0.82346835
  0.51400000   0.82346977
  0.51400000   0.82347118
  0.51400000   0.82347259
  0.51400000   0.82347400
  0.51400000   0.82347541
  0.51400000   0.82347681
  0.51400000   0.82347822
  0.51400000   0.82347962
  0.51400000   0.82348102
  0.51400000   0.82348241
  0.51400000   0.82348381
  0.51400000   0.82348520
  0.51400000   0.82348659
  0.51400000   0.82348798
  0.51400000   0.82348937
  0.51400000   0.82349075
  0.51400000   0.82349213
  0.51450000   0.82344892
  0.51450000   0.82345038
  0.51450000   0.82345184
  0.51450000   0.82345329
  0.51450000   0.82345475
  0.51450000   0.82345620
  0.51450000   0.82345765
  0.51450000   0.82345909
  0.51450000   0.82346054
  0.51450000   0.82346198
  0.51450000   0.82346342
  0.51450000   0.82346486
  0.51450000   0.82346629
  0.51450000   0.82346773
  0.51450000   0.82346916
  0.51450000   0.82347059
  0.51450000   0.82347201
  0.51450000   0.82347344
  0.51450000   0.82347486
  0.51450000   0.82347628
  0.51450000   0.82347770
  0.51450000   0.82347911
  0.51450000   0.82348052
  0.51450000   0.82348194
  0.51450000   0.82348335
  0.51450000   0.82348475
  0.51450000   0.82348616
  0.51450000   0.82348756
  0.51450000   0.82348896
  0.51450000   0.82349036
  0.51450000   0.82349175
  0.51450000   0.82349315
  0.51450000   0.82349454
  0.51450000   0.82349593
  0.51450000   0.82349732
  0.51450000   0.82349870
  0.51450000   0.82350008
  0.51450000   0.82350147
  0.51450000   0.82350284
  0.51450000   0.82350422
  0.51500000   0.82346115
  0.51500000   0.82346261
  0.51500000   0.82346406
  0.51500000   0.82346551
  0.51500000   0.82346696
  0.51500000   0.82346841
  0.51500000   0.82346985
  0.51500000   0.82347129
  0.51500000   0.82347273
  0.51500000   0.82347417
  0.51500000   0.82347560
  0.51500000   0.82347704
  0.51500000   0.82347847
  0.51500000   0.82347990
  0.51500000   0.82348132
  0.51500000   0.82348274
  0.51500000   0.82348417
  0.51500000   0.82348559
  0.51500000   0.82348700
  0.51500000   0.82348842
  0.51500000   0.82348983
  0.51500000   0.82349124
  0.51500000   0.82349265
  0.51500000   0.82349405
  0.51500000   0.82349546
  0.51500000   0.82349686
  0.51500000   0.82349826
  0.51500000   0.82349966
  0.51500000   0.82350105
  0.51500000   0.82350244
  0.51500000   0.82350384
  0.51500000   0.82350522
  0.51500000   0.82350661
  0.51500000   0.82350800
  0.51500000   0.82350938
  0.51500000   0.82351076
  0.51500000   0.82351214
  0.51500000   0.82351351
  0.51500000   0.82351489
  0.51500000   0.82351626
  0.51550000   0.82347334
  0.51550000   0.82347479
  0.51550000   0.82347624
  0.51550000   0.82347768
  0.51550000   0.82347913
  0.51550000   0.82348057
  0.51550000   0.82348200
  0.51550000   0.82348344
  0.51550000   0.82348488
  0.51550000   0.82348631
  0.51550000   0.82348774
  0.51550000   0.82348916
  0.51550000   0.82349059
  0.51550000   0.82349201
  0.51550000   0.82349343
  0.51550000   0.82349485
  0.51550000   0.82349627
  0.51550000   0.82349768
  0.51550000   0.82349909
  0.51550000   0.82350050
  0.51550000   0.82350191
  0.51550000   0.82350332
  0.51550000   0.82350472
  0.51550000   0.82350612
  0.51550000   0.82350752
  0.51550000   0.82350891
  0.51550000   0.82351031
  0.51550000   0.82351170
  0.51550000   0.82351309
  0.51550000   0.82351448
  0.51550000   0.82351587
  0.51550000   0.82351725
  0.51550000   0.82351863
  0.51550000   0.82352001
  0.51550000   0.82352139
  0.51550000   0.82352276
  0.51550000   0.82352414
  0.51550000   0.82352551
  0.51550000   0.82352688
  0.51550000   0.82352824
  0.51600000   0.82348547
  0.51600000   0.82348692
  0.51600000   0.82348836
  0.51600000   0.82348980
  0.51600000   0.82349124
  0.51600000   0.82349267
  0.51600000   0.82349411
  0.51600000   0.82349554
  0.51600000   0.82349697
  0.51600000   0.82349839
  0.51600000   0.82349982
  0.51600000   0.82350124
  0.51600000   0.82350266
  0.51600000   0.82350408
  0.51600000   0.82350549
  0.51600000   0.82350691
  0.51600000   0.82350832
  0.51600000   0.82350973
  0.51600000   0.82351113
  0.51600000   0.82351254
  0.51600000   0.82351394
  0.51600000   0.82351534
  0.51600000   0.82351674
  0.51600000   0.82351813
  0.51600000   0.82351953
  0.51600000   0.82352092
  0.51600000   0.82352231
  0.51600000   0.82352369
  0.51600000   0.82352508
  0.51600000   0.82352646
  0.51600000   0.82352784
  0.51600000   0.82352922
  0.51600000   0.82353060
  0.51600000   0.82353197
  0.51600000   0.82353335
  0.51600000   0.82353472
  0.51600000   0.82353608
  0.51600000   0.82353745
  0.51600000   0.82353881
  0.51600000   0.82354018
  0.51650000   0.82349755
  0.51650000   0.82349899
  0.51650000   0.82350043
  0.51650000   0.82350186
  0.51650000   0.82350330
  0.51650000   0.82350473
  0.51650000   0.82350615
  0.51650000   0.82350758
  0.51650000   0.82350900
  0.51650000   0.82351043
  0.51650000   0.82351184
  0.51650000   0.82351326
  0.51650000   0.82351468
  0.51650000   0.82351609
  0.51650000   0.82351750
  0.51650000   0.82351891
  0.51650000   0.82352031
  0.51650000   0.82352172
  0.51650000   0.82352312
  0.51650000   0.82352452
  0.51650000   0.82352592
  0.51650000   0.82352731
  0.51650000   0.82352870
  0.51650000   0.82353009
  0.51650000   0.82353148
  0.51650000   0.82353287
  0.51650000   0.82353425
  0.51650000   0.82353564
  0.51650000   0.82353702
  0.51650000   0.82353839
  0.51650000   0.82353977
  0.51650000   0.82354114
  0.51650000   0.82354251
  0.51650000   0.82354388
  0.51650000   0.82354525
  0.51650000   0.82354662
  0.51650000   0.82354798
  0.51650000   0.82354934
  0.51650000   0.82355070
  0.51650000   0.82355206
  0.51700000   0.82350958
  0.51700000   0.82351101
  0.51700000   0.82351245
  0.51700000   0.82351387
  0.51700000   0.82351530
  0.51700000   0.82351673
  0.51700000   0.82351815
  0.51700000   0.82351957
  0.51700000   0.82352099
  0.51700000   0.82352241
  0.51700000   0.82352382
  0.51700000   0.82352523
  0.51700000   0.82352664
  0.51700000   0.82352805
  0.51700000   0.82352945
  0.51700000   0.82353086
  0.51700000   0.82353226
  0.51700000   0.82353366
  0.51700000   0.82353505
  0.51700000   0.82353645
  0.51700000   0.82353784
  0.51700000   0.82353923
  0.51700000   0.82354062
  0.51700000   0.82354200
  0.51700000   0.82354339
  0.51700000   0.82354477
  0.51700000   0.82354615
  0.51700000   0.82354753
  0.51700000   0.82354890
  0.51700000   0.82355027
  0.51700000   0.82355164
  0.51700000   0.82355301
  0.51700000   0.82355438
  0.51700000   0.82355574
  0.51700000   0.82355711
  0.51700000   0.82355847
  0.51700000   0.82355982
  0.51700000   0.82356118
  0.51700000   0.82356253
  0.51700000   0.82356389
  0.51750000   0.82352155
  0.51750000   0.82352298
  0.51750000   0.82352441
  0.51750000   0.82352584
  0.51750000   0.82352726
  0.51750000   0.82352868
  0.51750000   0.82353010
  0.51750000   0.82353151
  0.51750000   0.82353292
  0.51750000   0.82353434
  0.51750000   0.82353574
  0.51750000   0.82353715
  0.51750000   0.82353856
  0.51750000   0.82353996
  0.51750000   0.82354136
  0.51750000   0.82354276
  0.51750000   0.82354415
  0.51750000   0.82354555
  0.51750000   0.82354694
  0.51750000   0.82354833
  0.51750000   0.82354971
  0.51750000   0.82355110
  0.51750000   0.82355248
  0.51750000   0.82355386
  0.51750000   0.82355524
  0.51750000   0.82355662
  0.51750000   0.82355799
  0.51750000   0.82355936
  0.51750000   0.82356073
  0.51750000   0.82356210
  0.51750000   0.82356347
  0.51750000   0.82356483
  0.51750000   0.82356619
  0.51750000   0.82356755
  0.51750000   0.82356891
  0.51750000   0.82357026
  0.51750000   0.82357162
  0.51750000   0.82357297
  0.51750000   0.82357432
  0.51750000   0.82357567
  0.51800000   0.82353348
  0.51800000   0.82353490
  0.51800000   0.82353632
  0.51800000   0.82353774
  0.51800000   0.82353916
  0.51800000   0.82354058
  0.51800000   0.82354199
  0.51800000   0.82354340
  0.51800000   0.82354481
  0.51800000   0.82354621
  0.51800000   0.82354762
  0.51800000   0.82354902
  0.51800000   0.82355042
  0.51800000   0.82355182
  0.51800000   0.82355321
  0.51800000   0.82355460
  0.51800000   0.82355599
  0.51800000   0.82355738
  0.51800000   0.82355877
  0.51800000   0.82356015
  0.51800000   0.82356154
  0.51800000   0.82356292
  0.51800000   0.82356429
  0.51800000   0.82356567
  0.51800000   0.82356704
  0.51800000   0.82356841
  0.51800000   0.82356978
  0.51800000   0.82357115
  0.51800000   0.82357251
  0.51800000   0.82357388
  0.51800000   0.82357524
  0.51800000   0.82357660
  0.51800000   0.82357795
  0.51800000   0.82357931
  0.51800000   0.82358066
  0.51800000   0.82358201
  0.51800000   0.82358336
  0.51800000   0.82358471
  0.51800000   0.82358605
  0.51800000   0.82358739
  0.51850000   0.82354535
  0.51850000   0.82354677
  0.51850000   0.82354819
  0.51850000   0.82354960
  0.51850000   0.82355101
  0.51850000   0.82355242
  0.51850000   0.82355383
  0.51850000   0.82355524
  0.51850000   0.82355664
  0.51850000   0.82355804
  0.51850000   0.82355944
  0.51850000   0.82356084
  0.51850000   0.82356223
  0.51850000   0.82356362
  0.51850000   0.82356501
  0.51850000   0.82356640
  0.51850000   0.82356778
  0.51850000   0.82356917
  0.51850000   0.82357055
  0.51850000   0.82357193
  0.51850000   0.82357331
  0.51850000   0.82357468
  0.51850000   0.82357605
  0.51850000   0.82357742
  0.51850000   0.82357879
  0.51850000   0.82358016
  0.51850000   0.82358152
  0.51850000   0.82358289
  0.51850000   0.82358425
  0.51850000   0.82358560
  0.51850000   0.82358696
  0.51850000   0.82358831
  0.51850000   0.82358966
  0.51850000   0.82359101
  0.51850000   0.82359236
  0.51850000   0.82359371
  0.51850000   0.82359505
  0.51850000   0.82359639
  0.51850000   0.82359773
  0.51850000   0.82359907
  0.51900000   0.82355717
  0.51900000   0.82355859
  0.51900000   0.82356000
  0.51900000   0.82356141
  0.51900000   0.82356281
  0.51900000   0.82356422
  0.51900000   0.82356562
  0.51900000   0.82356702
  0.51900000   0.82356842
  0.51900000   0.82356982
  0.51900000   0.82357121
  0.51900000   0.82357260
  0.51900000   0.82357399
  0.51900000   0.82357538
  0.51900000   0.82357676
  0.51900000   0.82357814
  0.51900000   0.82357952
  0.51900000   0.82358090
  0.51900000   0.82358228
  0.51900000   0.82358365
  0.51900000   0.82358503
  0.51900000   0.82358640
  0.51900000   0.82358776
  0.51900000   0.82358913
  0.51900000   0.82359049
  0.51900000   0.82359185
  0.51900000   0.82359321
  0.51900000   0.82359457
  0.51900000   0.82359593
  0.51900000   0.82359728
  0.51900000   0.82359863
  0.51900000   0.82359998
  0.51900000   0.82360133
  0.51900000   0.82360267
  0.51900000   0.82360401
  0.51900000   0.82360535
  0.51900000   0.82360669
  0.51900000   0.82360803
  0.51900000   0.82360936
  0.51900000   0.82361069
  0.51950000   0.82356894
  0.51950000   0.82357035
  0.51950000   0.82357176
  0.51950000   0.82357316
  0.51950000   0.82357456
  0.51950000   0.82357596
  0.51950000   0.82357736
  0.51950000   0.82357876
  0.51950000   0.82358015
  0.51950000   0.82358154
  0.51950000   0.82358293
  0.51950000   0.82358431
  0.51950000   0.82358570
  0.51950000   0.82358708
  0.51950000   0.82358846
  0.51950000   0.82358984
  0.51950000   0.82359121
  0.51950000   0.82359259
  0.51950000   0.82359396
  0.51950000   0.82359533
  0.51950000   0.82359669
  0.51950000   0.82359806
  0.51950000   0.82359942
  0.51950000   0.82360078
  0.51950000   0.82360214
  0.51950000   0.82360350
  0.51950000   0.82360485
  0.51950000   0.82360620
  0.51950000   0.82360755
  0.51950000   0.82360890
  0.51950000   0.82361025
  0.51950000   0.82361159
  0.51950000   0.82361293
  0.51950000   0.82361427
  0.51950000   0.82361561
  0.51950000   0.82361695
  0.51950000   0.82361828
  0.51950000   0.82361961
  0.51950000   0.82362094
  0.51950000   0.82362227
  0.52000000   0.82358066
  0.52000000   0.82358207
  0.52000000   0.82358347
  0.52000000   0.82358487
  0.52000000   0.82358626
  0.52000000   0.82358766
  0.52000000   0.82358905
  0.52000000   0.82359044
  0.52000000   0.82359183
  0.52000000   0.82359321
  0.52000000   0.82359460
  0.52000000   0.82359598
  0.52000000   0.82359736
  0.52000000   0.82359873
  0.52000000   0.82360011
  0.52000000   0.82360148
  0.52000000   0.82360285
  0.52000000   0.82360422
  0.52000000   0.82360559
  0.52000000   0.82360695
  0.52000000   0.82360831
  0.52000000   0.82360967
  0.52000000   0.82361103
  0.52000000   0.82361239
  0.52000000   0.82361374
  0.52000000   0.82361509
  0.52000000   0.82361644
  0.52000000   0.82361779
  0.52000000   0.82361913
  0.52000000   0.82362048
  0.52000000   0.82362182
  0.52000000   0.82362316
  0.52000000   0.82362449
  0.52000000   0.82362583
  0.52000000   0.82362716
  0.52000000   0.82362849
  0.52000000   0.82362982
  0.52000000   0.82363115
  0.52000000   0.82363247
  0.52000000   0.82363380
  0.52050000   0.82359233
  0.52050000   0.82359373
  0.52050000   0.82359513
  0.52050000   0.82359652
  0.52050000   0.82359791
  0.52050000   0.82359930
  0.52050000   0.82360069
  0.52050000   0.82360207
  0.52050000   0.82360346
  0.52050000   0.82360484
  0.52050000   0.82360621
  0.52050000   0.82360759
  0.52050000   0.82360897
  0.52050000   0.82361034
  0.52050000   0.82361171
  0.52050000   0.82361308
  0.52050000   0.82361444
  0.52050000   0.82361580
  0.52050000   0.82361717
  0.52050000   0.82361852
  0.52050000   0.82361988
  0.52050000   0.82362124
  0.52050000   0.82362259
  0.52050000   0.82362394
  0.52050000   0.82362529
  0.52050000   0.82362664
  0.52050000   0.82362798
  0.52050000   0.82362932
  0.52050000   0.82363066
  0.52050000   0.82363200
  0.52050000   0.82363334
  0.52050000   0.82363467
  0.52050000   0.82363600
  0.52050000   0.82363733
  0.52050000   0.82363866
  0.52050000   0.82363999
  0.52050000   0.82364131
  0.52050000   0.82364263
  0.52050000   0.82364395
  0.52050000   0.82364527
  0.52100000   0.82360395
  0.52100000   0.82360534
  0.52100000   0.82360673
  0.52100000   0.82360812
  0.52100000   0.82360951
  0.52100000   0.82361089
  0.52100000   0.82361228
  0.52100000   0.82361366
  0.52100000   0.82361503
  0.52100000   0.82361641
  0.52100000   0.82361778
  0.52100000   0.82361915
  0.52100000   0.82362052
  0.52100000   0.82362189
  0.52100000   0.82362326
  0.52100000   0.82362462
  0.52100000   0.82362598
  0.52100000   0.82362734
  0.52100000   0.82362869
  0.52100000   0.82363005
  0.52100000   0.82363140
  0.52100000   0.82363275
  0.52100000   0.82363410
  0.52100000   0.82363544
  0.52100000   0.82363679
  0.52100000   0.82363813
  0.52100000   0.82363947
  0.52100000   0.82364081
  0.52100000   0.82364214
  0.52100000   0.82364348
  0.52100000   0.82364481
  0.52100000   0.82364614
  0.52100000   0.82364746
  0.52100000   0.82364879
  0.52100000   0.82365011
  0.52100000   0.82365143
  0.52100000   0.82365275
  0.52100000   0.82365407
  0.52100000   0.82365538
  0.52100000   0.82365670
  0.52150000   0.82361552
  0.52150000   0.82361691
  0.52150000   0.82361829
  0.52150000   0.82361968
  0.52150000   0.82362106
  0.52150000   0.82362244
  0.52150000   0.82362381
  0.52150000   0.82362519
  0.52150000   0.82362656
  0.52150000   0.82362793
  0.52150000   0.82362930
  0.52150000   0.82363067
  0.52150000   0.82363203
  0.52150000   0.82363339
  0.52150000   0.82363475
  0.52150000   0.82363611
  0.52150000   0.82363747
  0.52150000   0.82363882
  0.52150000   0.82364017
  0.52150000   0.82364152
  0.52150000   0.82364287
  0.52150000   0.82364421
  0.52150000   0.82364556
  0.52150000   0.82364690
  0.52150000   0.82364824
  0.52150000   0.82364957
  0.52150000   0.82365091
  0.52150000   0.82365224
  0.52150000   0.82365357
  0.52150000   0.82365490
  0.52150000   0.82365623
  0.52150000   0.82365755
  0.52150000   0.82365887
  0.52150000   0.82366019
  0.52150000   0.82366151
  0.52150000   0.82366283
  0.52150000   0.82366414
  0.52150000   0.82366545
  0.52150000   0.82366676
  0.52150000   0.82366807
  0.52200000   0.82362704
  0.52200000   0.82362842
  0.52200000   0.82362980
  0.52200000   0.82363118
  0.52200000   0.82363256
  0.52200000   0.82363393
  0.52200000   0.82363530
  0.52200000   0.82363667
  0.52200000   0.82363804
  0.52200000   0.82363941
  0.52200000   0.82364077
  0.52200000   0.82364213
  0.52200000   0.82364349
  0.52200000   0.82364485
  0.52200000   0.82364620
  0.52200000   0.82364755
  0.52200000   0.82364891
  0.52200000   0.82365025
  0.52200000   0.82365160
  0.52200000   0.82365294
  0.52200000   0.82365429
  0.52200000   0.82365563
  0.52200000   0.82365697
  0.52200000   0.82365830
  0.52200000   0.82365964
  0.52200000   0.82366097
  0.52200000   0.82366230
  0.52200000   0.82366363
  0.52200000   0.82366495
  0.52200000   0.82366627
  0.52200000   0.82366760
  0.52200000   0.82366892
  0.52200000   0.82367023
  0.52200000   0.82367155
  0.52200000   0.82367286
  0.52200000   0.82367417
  0.52200000   0.82367548
  0.52200000   0.82367679
  0.52200000   0.82367810
  0.52200000   0.82367940
  0.52250000   0.82363851
  0.52250000   0.82363988
  0.52250000   0.82364126
  0.52250000   0.82364263
  0.52250000   0.82364400
  0.52250000   0.82364537
  0.52250000   0.82364674
  0.52250000   0.82364811
  0.52250000   0.82364947
  0.52250000   0.82365083
  0.52250000   0.82365219
  0.52250000   0.82365354
  0.52250000   0.82365490
  0.52250000   0.82365625
  0.52250000   0.82365760
  0.52250000   0.82365895
  0.52250000   0.82366029
  0.52250000   0.82366164
  0.52250000   0.82366298
  0.52250000   0.82366432
  0.52250000   0.82366566
  0.52250000   0.82366699
  0.52250000   0.82366833
  0.52250000   0.82366966
  0.52250000   0.82367099
  0.52250000   0.82367231
  0.52250000   0.82367364
  0.52250000   0.82367496
  0.52250000   0.82367628
  0.52250000   0.82367760
  0.52250000   0.82367892
  0.52250000   0.82368023
  0.52250000   0.82368154
  0.52250000   0.82368286
  0.52250000   0.82368416
  0.52250000   0.82368547
  0.52250000   0.82368678
  0.52250000   0.82368808
  0.52250000   0.82368938
  0.52250000   0.82369068
  0.52300000   0.82364992
  0.52300000   0.82365130
  0.52300000   0.82365267
  0.52300000   0.82365404
  0.52300000   0.82365540
  0.52300000   0.82365677
  0.52300000   0.82365813
  0.52300000   0.82365949
  0.52300000   0.82366085
  0.52300000   0.82366220
  0.52300000   0.82366356
  0.52300000   0.82366491
  0.52300000   0.82366626
  0.52300000   0.82366761
  0.52300000   0.82366895
  0.52300000   0.82367029
  0.52300000   0.82367163
  0.52300000   0.82367297
  0.52300000   0.82367431
  0.52300000   0.82367564
  0.52300000   0.82367698
  0.52300000   0.82367831
  0.52300000   0.82367964
  0.52300000   0.82368096
  0.52300000   0.82368229
  0.52300000   0.82368361
  0.52300000   0.82368493
  0.52300000   0.82368625
  0.52300000   0.82368756
  0.52300000   0.82368888
  0.52300000   0.82369019
  0.52300000   0.82369150
  0.52300000   0.82369281
  0.52300000   0.82369411
  0.52300000   0.82369542
  0.52300000   0.82369672
  0.52300000   0.82369802
  0.52300000   0.82369932
  0.52300000   0.82370061
  0.52300000   0.82370191
  0.52350000   0.82366129
  0.52350000   0.82366266
  0.52350000   0.82366403
  0.52350000   0.82366539
  0.52350000   0.82366675
  0.52350000   0.82366811
  0.52350000   0.82366947
  0.52350000   0.82367083
  0.52350000   0.82367218
  0.52350000   0.82367353
  0.52350000   0.82367488
  0.52350000   0.82367622
  0.52350000   0.82367757
  0.52350000   0.82367891
  0.52350000   0.82368025
  0.52350000   0.82368159
  0.52350000   0.82368293
  0.52350000   0.82368426
  0.52350000   0.82368559
  0.52350000   0.82368692
  0.52350000   0.82368825
  0.52350000   0.82368957
  0.52350000   0.82369090
  0.52350000   0.82369222
  0.52350000   0.82369354
  0.52350000   0.82369486
  0.52350000   0.82369617
  0.52350000   0.82369748
  0.52350000   0.82369880
  0.52350000   0.82370010
  0.52350000   0.82370141
  0.52350000   0.82370272
  0.52350000   0.82370402
  0.52350000   0.82370532
  0.52350000   0.82370662
  0.52350000   0.82370792
  0.52350000   0.82370921
  0.52350000   0.82371051
  0.52350000   0.82371180
  0.52350000   0.82371309
  0.52400000   0.82367262
  0.52400000   0.82367398
  0.52400000   0.82367534
  0.52400000   0.82367670
  0.52400000   0.82367805
  0.52400000   0.82367941
  0.52400000   0.82368076
  0.52400000   0.82368211
  0.52400000   0.82368346
  0.52400000   0.82368481
  0.52400000   0.82368615
  0.52400000   0.82368749
  0.52400000   0.82368883
  0.52400000   0.82369017
  0.52400000   0.82369150
  0.52400000   0.82369284
  0.52400000   0.82369417
  0.52400000   0.82369550
  0.52400000   0.82369682
  0.52400000   0.82369815
  0.52400000   0.82369947
  0.52400000   0.82370079
  0.52400000   0.82370211
  0.52400000   0.82370343
  0.52400000   0.82370474
  0.52400000   0.82370605
  0.52400000   0.82370736
  0.52400000   0.82370867
  0.52400000   0.82370998
  0.52400000   0.82371128
  0.52400000   0.82371259
  0.52400000   0.82371389
  0.52400000   0.82371518
  0.52400000   0.82371648
  0.52400000   0.82371778
  0.52400000   0.82371907
  0.52400000   0.82372036
  0.52400000   0.82372165
  0.52400000   0.82372293
  0.52400000   0.82372422
  0.52450000   0.82368389
  0.52450000   0.82368525
  0.52450000   0.82368660
  0.52450000   0.82368796
  0.52450000   0.82368931
  0.52450000   0.82369066
  0.52450000   0.82369200
  0.52450000   0.82369335
  0.52450000   0.82369469
  0.52450000   0.82369603
  0.52450000   0.82369737
  0.52450000   0.82369871
  0.52450000   0.82370004
  0.52450000   0.82370138
  0.52450000   0.82370271
  0.52450000   0.82370403
  0.52450000   0.82370536
  0.52450000   0.82370668
  0.52450000   0.82370801
  0.52450000   0.82370933
  0.52450000   0.82371064
  0.52450000   0.82371196
  0.52450000   0.82371327
  0.52450000   0.82371459
  0.52450000   0.82371590
  0.52450000   0.82371720
  0.52450000   0.82371851
  0.52450000   0.82371981
  0.52450000   0.82372111
  0.52450000   0.82372241
  0.52450000   0.82372371
  0.52450000   0.82372501
  0.52450000   0.82372630
  0.52450000   0.82372759
  0.52450000   0.82372888
  0.52450000   0.82373017
  0.52450000   0.82373146
  0.52450000   0.82373274
  0.52450000   0.82373402
  0.52450000   0.82373530
  0.52500000   0.82369511
  0.52500000   0.82369646
  0.52500000   0.82369781
  0.52500000   0.82369916
  0.52500000   0.82370051
  0.52500000   0.82370185
  0.52500000   0.82370320
  0.52500000   0.82370454
  0.52500000   0.82370588
  0.52500000   0.82370721
  0.52500000   0.82370855
  0.52500000   0.82370988
  0.52500000   0.82371121
  0.52500000   0.82371253
  0.52500000   0.82371386
  0.52500000   0.82371518
  0.52500000   0.82371651
  0.52500000   0.82371782
  0.52500000   0.82371914
  0.52500000   0.82372046
  0.52500000   0.82372177
  0.52500000   0.82372308
  0.52500000   0.82372439
  0.52500000   0.82372570
  0.52500000   0.82372700
  0.52500000   0.82372831
  0.52500000   0.82372961
  0.52500000   0.82373090
  0.52500000   0.82373220
  0.52500000   0.82373350
  0.52500000   0.82373479
  0.52500000   0.82373608
  0.52500000   0.82373737
  0.52500000   0.82373866
  0.52500000   0.82373994
  0.52500000   0.82374122
  0.52500000   0.82374251
  0.52500000   0.82374378
  0.52500000   0.82374506
  0.52500000   0.82374634
  0.52550000   0.82370629
  0.52550000   0.82370763
  0.52550000   0.82370898
  0.52550000   0.82371032
  0.52550000   0.82371167
  0.52550000   0.82371301
  0.52550000   0.82371434
  0.52550000   0.82371568
  0.52550000   0.82371701
  0.52550000   0.82371834
  0.52550000   0.82371967
  0.52550000   0.82372100
  0.52550000   0.82372232
  0.52550000   0.82372365
  0.52550000   0.82372497
  0.52550000   0.82372629
  0.52550000   0.82372760
  0.52550000   0.82372892
  0.52550000   0.82373023
  0.52550000   0.82373154
  0.52550000   0.82373285
  0.52550000   0.82373415
  0.52550000   0.82373546
  0.52550000   0.82373676
  0.52550000   0.82373806
  0.52550000   0.82373936
  0.52550000   0.82374065
  0.52550000   0.82374195
  0.52550000   0.82374324
  0.52550000   0.82374453
  0.52550000   0.82374582
  0.52550000   0.82374711
  0.52550000   0.82374839
  0.52550000   0.82374967
  0.52550000   0.82375095
  0.52550000   0.82375223
  0.52550000   0.82375351
  0.52550000   0.82375478
  0.52550000   0.82375605
  0.52550000   0.82375732
  0.52600000   0.82371741
  0.52600000   0.82371876
  0.52600000   0.82372010
  0.52600000   0.82372144
  0.52600000   0.82372277
  0.52600000   0.82372411
  0.52600000   0.82372544
  0.52600000   0.82372677
  0.52600000   0.82372810
  0.52600000   0.82372942
  0.52600000   0.82373075
  0.52600000   0.82373207
  0.52600000   0.82373339
  0.52600000   0.82373471
  0.52600000   0.82373602
  0.52600000   0.82373734
  0.52600000   0.82373865
  0.52600000   0.82373996
  0.52600000   0.82374127
  0.52600000   0.82374257
  0.52600000   0.82374388
  0.52600000   0.82374518
  0.52600000   0.82374648
  0.52600000   0.82374778
  0.52600000   0.82374907
  0.52600000   0.82375036
  0.52600000   0.82375166
  0.52600000   0.82375294
  0.52600000   0.82375423
  0.52600000   0.82375552
  0.52600000   0.82375680
  0.52600000   0.82375808
  0.52600000   0.82375936
  0.52600000   0.82376064
  0.52600000   0.82376192
  0.52600000   0.82376319
  0.52600000   0.82376446
  0.52600000   0.82376573
  0.52600000   0.82376700
  0.52600000   0.82376826
  0.52650000   0.82372849
  0.52650000   0.82372983
  0.52650000   0.82373117
  0.52650000   0.82373250
  0.52650000   0.82373383
  0.52650000   0.82373516
  0.52650000   0.82373649
  0.52650000   0.82373781
  0.52650000   0.82373914
  0.52650000   0.82374046
  0.52650000   0.82374178
  0.52650000   0.82374310
  0.52650000   0.82374441
  0.52650000   0.82374572
  0.52650000   0.82374704
  0.52650000   0.82374834
  0.52650000   0.82374965
  0.52650000   0.82375096
  0.52650000   0.82375226
  0.52650000   0.82375356
  0.52650000   0.82375486
  0.52650000   0.82375616
  0.52650000   0.82375745
  0.52650000   0.82375874
  0.52650000   0.82376003
  0.52650000   0.82376132
  0.52650000   0.82376261
  0.52650000   0.82376389
  0.52650000   0.82376518
  0.52650000   0.82376646
  0.52650000   0.82376774
  0.52650000   0.82376901
  0.52650000   0.82377029
  0.52650000   0.82377156
  0.52650000   0.82377283
  0.52650000   0.82377410
  0.52650000   0.82377537
  0.52650000   0.82377663
  0.52650000   0.82377789
  0.52650000   0.82377916
  0.52700000   0.82373952
  0.52700000   0.82374085
  0.52700000   0.82374219
  0.52700000   0.82374352
  0.52700000   0.82374484
  0.52700000   0.82374617
  0.52700000   0.82374749
  0.52700000   0.82374881
  0.52700000   0.82375013
  0.52700000   0.82375145
  0.52700000   0.82375276
  0.52700000   0.82375407
  0.52700000   0.82375538
  0.52700000   0.82375669
  0.52700000   0.82375800
  0.52700000   0.82375930
  0.52700000   0.82376060
  0.52700000   0.82376190
  0.52700000   0.82376320
  0.52700000   0.82376450
  0.52700000   0.82376579
  0.52700000   0.82376708
  0.52700000   0.82376837
  0.52700000   0.82376966
  0.52700000   0.82377095
  0.52700000   0.82377223
  0.52700000   0.82377351
  0.52700000   0.82377479
  0.52700000   0.82377607
  0.52700000   0.82377735
  0.52700000   0.82377862
  0.52700000   0.82377989
  0.52700000   0.82378116
  0.52700000   0.82378243
  0.52700000   0.82378370
  0.52700000   0.82378496
  0.52700000   0.82378623
  0.52700000   0.82378749
  0.52700000   0.82378874
  0.52700000   0.82379000
  0.52750000   0.82375050
  0.52750000   0.82375183
  0.52750000   0.82375316
  0.52750000   0.82375448
  0.52750000   0.82375581
  0.52750000   0.82375713
  0.52750000   0.82375844
  0.52750000   0.82375976
  0.52750000   0.82376107
  0.52750000   0.82376239
  0.52750000   0.82376370
  0.52750000   0.82376500
  0.52750000   0.82376631
  0.52750000   0.82376761
  0.52750000   0.82376891
  0.52750000   0.82377021
  0.52750000   0.82377151
  0.52750000   0.82377281
  0.52750000   0.82377410
  0.52750000   0.82377539
  0.52750000   0.82377668
  0.52750000   0.82377797
  0.52750000   0.82377925
  0.52750000   0.82378054
  0.52750000   0.82378182
  0.52750000   0.82378310
  0.52750000   0.82378437
  0.52750000   0.82378565
  0.52750000   0.82378692
  0.52750000   0.82378819
  0.52750000   0.82378946
  0.52750000   0.82379073
  0.52750000   0.82379200
  0.52750000   0.82379326
  0.52750000   0.82379452
  0.52750000   0.82379578
  0.52750000   0.82379704
  0.52750000   0.82379829
  0.52750000   0.82379955
  0.52750000   0.82380080
  0.52800000   0.82376144
  0.52800000   0.82376276
  0.52800000   0.82376409
  0.52800000   0.82376540
  0.52800000   0.82376672
  0.52800000   0.82376804
  0.52800000   0.82376935
  0.52800000   0.82377066
  0.52800000   0.82377197
  0.52800000   0.82377328
  0.52800000   0.82377458
  0.52800000   0.82377589
  0.52800000   0.82377719
  0.52800000   0.82377849
  0.52800000   0.82377978
  0.52800000   0.82378108
  0.52800000   0.82378237
  0.52800000   0.82378366
  0.52800000   0.82378495
  0.52800000   0.82378623
  0.52800000   0.82378752
  0.52800000   0.82378880
  0.52800000   0.82379008
  0.52800000   0.82379136
  0.52800000   0.82379264
  0.52800000   0.82379391
  0.52800000   0.82379518
  0.52800000   0.82379646
  0.52800000   0.82379772
  0.52800000   0.82379899
  0.52800000   0.82380026
  0.52800000   0.82380152
  0.52800000   0.82380278
  0.52800000   0.82380404
  0.52800000   0.82380529
  0.52800000   0.82380655
  0.52800000   0.82380780
  0.52800000   0.82380905
  0.52800000   0.82381030
  0.52800000   0.82381155
  0.52850000   0.82377233
  0.52850000   0.82377365
  0.52850000   0.82377496
  0.52850000   0.82377628
  0.52850000   0.82377759
  0.52850000   0.82377890
  0.52850000   0.82378021
  0.52850000   0.82378152
  0.52850000   0.82378282
  0.52850000   0.82378412
  0.52850000   0.82378542
  0.52850000   0.82378672
  0.52850000   0.82378802
  0.52850000   0.82378931
  0.52850000   0.82379060
  0.52850000   0.82379189
  0.52850000   0.82379318
  0.52850000   0.82379447
  0.52850000   0.82379575
  0.52850000   0.82379703
  0.52850000   0.82379831
  0.52850000   0.82379959
  0.52850000   0.82380087
  0.52850000   0.82380214
  0.52850000   0.82380341
  0.52850000   0.82380468
  0.52850000   0.82380595
  0.52850000   0.82380722
  0.52850000   0.82380848
  0.52850000   0.82380974
  0.52850000   0.82381100
  0.52850000   0.82381226
  0.52850000   0.82381352
  0.52850000   0.82381477
  0.52850000   0.82381602
  0.52850000   0.82381727
  0.52850000   0.82381852
  0.52850000   0.82381977
  0.52850000   0.82382101
  0.52850000   0.82382225
  0.52900000   0.82378317
  0.52900000   0.82378448
  0.52900000   0.82378580
  0.52900000   0.82378711
  0.52900000   0.82378841
  0.52900000   0.82378972
  0.52900000   0.82379102
  0.52900000   0.82379232
  0.52900000   0.82379362
  0.52900000   0.82379492
  0.52900000   0.82379622
  0.52900000   0.82379751
  0.52900000   0.82379880
  0.52900000   0.82380009
  0.52900000   0.82380138
  0.52900000   0.82380266
  0.52900000   0.82380395
  0.52900000   0.82380523
  0.52900000   0.82380651
  0.52900000   0.82380778
  0.52900000   0.82380906
  0.52900000   0.82381033
  0.52900000   0.82381160
  0.52900000   0.82381287
  0.52900000   0.82381414
  0.52900000   0.82381540
  0.52900000   0.82381667
  0.52900000   0.82381793
  0.52900000   0.82381919
  0.52900000   0.82382045
  0.52900000   0.82382170
  0.52900000   0.82382295
  0.52900000   0.82382421
  0.52900000   0.82382546
  0.52900000   0.82382670
  0.52900000   0.82382795
  0.52900000   0.82382919
  0.52900000   0.82383043
  0.52900000   0.82383167
  0.52900000   0.82383291
  0.52950000   0.82379396
  0.52950000   0.82379527
  0.52950000   0.82379658
  0.52950000   0.82379789
  0.52950000   0.82379919
  0.52950000   0.82380049
  0.52950000   0.82380179
  0.52950000   0.82380309
  0.52950000   0.82380438
  0.52950000   0.82380567
  0.52950000   0.82380696
  0.52950000   0.82380825
  0.52950000   0.82380954
  0.52950000   0.82381082
  0.52950000   0.82381211
  0.52950000   0.82381339
  0.52950000   0.82381466
  0.52950000   0.82381594
  0.52950000   0.82381722
  0.52950000   0.82381849
  0.52950000   0.82381976
  0.52950000   0.82382103
  0.52950000   0.82382229
  0.52950000   0.82382356
  0.52950000   0.82382482
  0.52950000   0.82382608
  0.52950000   0.82382734
  0.52950000   0.82382860
  0.52950000   0.82382985
  0.52950000   0.82383110
  0.52950000   0.82383235
  0.52950000   0.82383360
  0.52950000   0.82383485
  0.52950000   0.82383609
  0.52950000   0.82383734
  0.52950000   0.82383858
  0.52950000   0.82383982
  0.52950000   0.82384106
  0.52950000   0.82384229
  0.52950000   0.82384352
  0.53000000   0.82380471
  0.53000000   0.82380602
  0.53000000   0.82380732
  0.53000000   0.82380862
  0.53000000   0.82380992
  0.53000000   0.82381121
  0.53000000   0.82381251
  0.53000000   0.82381380
  0.53000000   0.82381509
  0.53000000   0.82381638
  0.53000000   0.82381766
  0.53000000   0.82381895
  0.53000000   0.82382023
  0.53000000   0.82382151
  0.53000000   0.82382279
  0.53000000   0.82382406
  0.53000000   0.82382534
  0.53000000   0.82382661
  0.53000000   0.82382788
  0.53000000   0.82382915
  0.53000000   0.82383041
  0.53000000   0.82383168
  0.53000000   0.82383294
  0.53000000   0.82383420
  0.53000000   0.82383545
  0.53000000   0.82383671
  0.53000000   0.82383796
  0.53000000   0.82383922
  0.53000000   0.82384047
  0.53000000   0.82384171
  0.53000000   0.82384296
  0.53000000   0.82384421
  0.53000000   0.82384545
  0.53000000   0.82384669
  0.53000000   0.82384793
  0.53000000   0.82384916
  0.53000000   0.82385040
  0.53000000   0.82385163
  0.53000000   0.82385286
  0.53000000   0.82385409
  0.53050000   0.82381541
  0.53050000   0.82381671
  0.53050000   0.82381801
  0.53050000   0.82381931
  0.53050000   0.82382060
  0.53050000   0.82382189
  0.53050000   0.82382318
  0.53050000   0.82382447
  0.53050000   0.82382575
  0.53050000   0.82382704
  0.53050000   0.82382832
  0.53050000   0.82382960
  0.53050000   0.82383087
  0.53050000   0.82383215
  0.53050000   0.82383342
  0.53050000   0.82383469
  0.53050000   0.82383596
  0.53050000   0.82383723
  0.53050000   0.82383849
  0.53050000   0.82383976
  0.53050000   0.82384102
  0.53050000   0.82384228
  0.53050000   0.82384353
  0.53050000   0.82384479
  0.53050000   0.82384604
  0.53050000   0.82384729
  0.53050000   0.82384854
  0.53050000   0.82384979
  0.53050000   0.82385104
  0.53050000   0.82385228
  0.53050000   0.82385352
  0.53050000   0.82385476
  0.53050000   0.82385600
  0.53050000   0.82385724
  0.53050000   0.82385847
  0.53050000   0.82385970
  0.53050000   0.82386093
  0.53050000   0.82386216
  0.53050000   0.82386339
  0.53050000   0.82386461
  0.53100000   0.82382607
  0.53100000   0.82382736
  0.53100000   0.82382866
  0.53100000   0.82382995
  0.53100000   0.82383124
  0.53100000   0.82383252
  0.53100000   0.82383381
  0.53100000   0.82383509
  0.53100000   0.82383637
  0.53100000   0.82383765
  0.53100000   0.82383893
  0.53100000   0.82384020
  0.53100000   0.82384147
  0.53100000   0.82384274
  0.53100000   0.82384401
  0.53100000   0.82384528
  0.53100000   0.82384654
  0.53100000   0.82384780
  0.53100000   0.82384906
  0.53100000   0.82385032
  0.53100000   0.82385158
  0.53100000   0.82385283
  0.53100000   0.82385409
  0.53100000   0.82385534
  0.53100000   0.82385659
  0.53100000   0.82385783
  0.53100000   0.82385908
  0.53100000   0.82386032
  0.53100000   0.82386156
  0.53100000   0.82386280
  0.53100000   0.82386404
  0.53100000   0.82386527
  0.53100000   0.82386651
  0.53100000   0.82386774
  0.53100000   0.82386897
  0.53100000   0.82387019
  0.53100000   0.82387142
  0.53100000   0.82387264
  0.53100000   0.82387387
  0.53100000   0.82387509
  0.53150000   0.82383668
  0.53150000   0.82383797
  0.53150000   0.82383926
  0.53150000   0.82384054
  0.53150000   0.82384183
  0.53150000   0.82384311
  0.53150000   0.82384439
  0.53150000   0.82384567
  0.53150000   0.82384694
  0.53150000   0.82384822
  0.53150000   0.82384949
  0.53150000   0.82385076
  0.53150000   0.82385202
  0.53150000   0.82385329
  0.53150000   0.82385455
  0.53150000   0.82385582
  0.53150000   0.82385708
  0.53150000   0.82385833
  0.53150000   0.82385959
  0.53150000   0.82386084
  0.53150000   0.82386210
  0.53150000   0.82386335
  0.53150000   0.82386459
  0.53150000   0.82386584
  0.53150000   0.82386708
  0.53150000   0.82386833
  0.53150000   0.82386957
  0.53150000   0.82387080
  0.53150000   0.82387204
  0.53150000   0.82387327
  0.53150000   0.82387451
  0.53150000   0.82387574
  0.53150000   0.82387697
  0.53150000   0.82387819
  0.53150000   0.82387942
  0.53150000   0.82388064
  0.53150000   0.82388186
  0.53150000   0.82388308
  0.53150000   0.82388430
  0.53150000   0.82388551
  0.53200000   0.82384724
  0.53200000   0.82384853
  0.53200000   0.82384981
  0.53200000   0.82385109
  0.53200000   0.82385237
  0.53200000   0.82385365
  0.53200000   0.82385492
  0.53200000   0.82385620
  0.53200000   0.82385747
  0.53200000   0.82385874
  0.53200000   0.82386000
  0.53200000   0.82386127
  0.53200000   0.82386253
  0.53200000   0.82386379
  0.53200000   0.82386505
  0.53200000   0.82386631
  0.53200000   0.82386756
  0.53200000   0.82386882
  0.53200000   0.82387007
  0.53200000   0.82387132
  0.53200000   0.82387257
  0.53200000   0.82387381
  0.53200000   0.82387505
  0.53200000   0.82387630
  0.53200000   0.82387753
  0.53200000   0.82387877
  0.53200000   0.82388001
  0.53200000   0.82388124
  0.53200000   0.82388247
  0.53200000   0.82388370
  0.53200000   0.82388493
  0.53200000   0.82388616
  0.53200000   0.82388738
  0.53200000   0.82388860
  0.53200000   0.82388982
  0.53200000   0.82389104
  0.53200000   0.82389226
  0.53200000   0.82389347
  0.53200000   0.82389469
  0.53200000   0.82389590
  0.53250000   0.82385776
  0.53250000   0.82385904
  0.53250000   0.82386032
  0.53250000   0.82386160
  0.53250000   0.82386287
  0.53250000   0.82386414
  0.53250000   0.82386541
  0.53250000   0.82386668
  0.53250000   0.82386795
  0.53250000   0.82386921
  0.53250000   0.82387047
  0.53250000   0.82387173
  0.53250000   0.82387299
  0.53250000   0.82387425
  0.53250000   0.82387550
  0.53250000   0.82387676
  0.53250000   0.82387801
  0.53250000   0.82387926
  0.53250000   0.82388050
  0.53250000   0.82388175
  0.53250000   0.82388299
  0.53250000   0.82388423
  0.53250000   0.82388547
  0.53250000   0.82388671
  0.53250000   0.82388794
  0.53250000   0.82388917
  0.53250000   0.82389041
  0.53250000   0.82389163
  0.53250000   0.82389286
  0.53250000   0.82389409
  0.53250000   0.82389531
  0.53250000   0.82389653
  0.53250000   0.82389775
  0.53250000   0.82389897
  0.53250000   0.82390019
  0.53250000   0.82390140
  0.53250000   0.82390261
  0.53250000   0.82390382
  0.53250000   0.82390503
  0.53250000   0.82390624
  0.53300000   0.82386823
  0.53300000   0.82386951
  0.53300000   0.82387078
  0.53300000   0.82387205
  0.53300000   0.82387332
  0.53300000   0.82387459
  0.53300000   0.82387586
  0.53300000   0.82387712
  0.53300000   0.82387838
  0.53300000   0.82387964
  0.53300000   0.82388090
  0.53300000   0.82388216
  0.53300000   0.82388341
  0.53300000   0.82388466
  0.53300000   0.82388591
  0.53300000   0.82388716
  0.53300000   0.82388841
  0.53300000   0.82388965
  0.53300000   0.82389089
  0.53300000   0.82389213
  0.53300000   0.82389337
  0.53300000   0.82389461
  0.53300000   0.82389584
  0.53300000   0.82389707
  0.53300000   0.82389830
  0.53300000   0.82389953
  0.53300000   0.82390076
  0.53300000   0.82390198
  0.53300000   0.82390320
  0.53300000   0.82390443
  0.53300000   0.82390564
  0.53300000   0.82390686
  0.53300000   0.82390808
  0.53300000   0.82390929
  0.53300000   0.82391050
  0.53300000   0.82391171
  0.53300000   0.82391292
  0.53300000   0.82391412
  0.53300000   0.82391533
  0.53300000   0.82391653
  0.53350000   0.82387866
  0.53350000   0.82387993
  0.53350000   0.82388120
  0.53350000   0.82388247
  0.53350000   0.82388373
  0.53350000   0.82388499
  0.53350000   0.82388626
  0.53350000   0.82388751
  0.53350000   0.82388877
  0.53350000   0.82389003
  0.53350000   0.82389128
  0.53350000   0.82389253
  0.53350000   0.82389378
  0.53350000   0.82389503
  0.53350000   0.82389627
  0.53350000   0.82389752
  0.53350000   0.82389876
  0.53350000   0.82390000
  0.53350000   0.82390123
  0.53350000   0.82390247
  0.53350000   0.82390370
  0.53350000   0.82390494
  0.53350000   0.82390617
  0.53350000   0.82390739
  0.53350000   0.82390862
  0.53350000   0.82390984
  0.53350000   0.82391106
  0.53350000   0.82391228
  0.53350000   0.82391350
  0.53350000   0.82391472
  0.53350000   0.82391593
  0.53350000   0.82391715
  0.53350000   0.82391836
  0.53350000   0.82391957
  0.53350000   0.82392077
  0.53350000   0.82392198
  0.53350000   0.82392318
  0.53350000   0.82392438
  0.53350000   0.82392558
  0.53350000   0.82392678
  0.53400000   0.82388904
  0.53400000   0.82389031
  0.53400000   0.82389157
  0.53400000   0.82389283
  0.53400000   0.82389409
  0.53400000   0.82389535
  0.53400000   0.82389661
  0.53400000   0.82389786
  0.53400000   0.82389912
  0.53400000   0.82390037
  0.53400000   0.82390162
  0.53400000   0.82390286
  0.53400000   0.82390411
  0.53400000   0.82390535
  0.53400000   0.82390659
  0.53400000   0.82390783
  0.53400000   0.82390907
  0.53400000   0.82391030
  0.53400000   0.82391153
  0.53400000   0.82391276
  0.53400000   0.82391399
  0.53400000   0.82391522
  0.53400000   0.82391645
  0.53400000   0.82391767
  0.53400000   0.82391889
  0.53400000   0.82392011
  0.53400000   0.82392133
  0.53400000   0.82392254
  0.53400000   0.82392376
  0.53400000   0.82392497
  0.53400000   0.82392618
  0.53400000   0.82392739
  0.53400000   0.82392859
  0.53400000   0.82392980
  0.53400000   0.82393100
  0.53400000   0.82393220
  0.53400000   0.82393340
  0.53400000   0.82393460
  0.53400000   0.82393579
  0.53400000   0.82393698
  0.53450000   0.82389938
  0.53450000   0.82390064
  0.53450000   0.82390190
  0.53450000   0.82390316
  0.53450000   0.82390441
  0.53450000   0.82390567
  0.53450000   0.82390692
  0.53450000   0.82390817
  0.53450000   0.82390942
  0.53450000   0.82391066
  0.53450000   0.82391191
  0.53450000   0.82391315
  0.53450000   0.82391439
  0.53450000   0.82391563
  0.53450000   0.82391686
  0.53450000   0.82391810
  0.53450000   0.82391933
  0.53450000   0.82392056
  0.53450000   0.82392179
  0.53450000   0.82392301
  0.53450000   0.82392424
  0.53450000   0.82392546
  0.53450000   0.82392668
  0.53450000   0.82392790
  0.53450000   0.82392912
  0.53450000   0.82393033
  0.53450000   0.82393155
  0.53450000   0.82393276
  0.53450000   0.82393397
  0.53450000   0.82393517
  0.53450000   0.82393638
  0.53450000   0.82393758
  0.53450000   0.82393878
  0.53450000   0.82393998
  0.53450000   0.82394118
  0.53450000   0.82394238
  0.53450000   0.82394357
  0.53450000   0.82394476
  0.53450000   0.82394596
  0.53450000   0.82394714
  0.53500000   0.82390967
  0.53500000   0.82391093
  0.53500000   0.82391218
  0.53500000   0.82391344
  0.53500000   0.82391469
  0.53500000   0.82391594
  0.53500000   0.82391718
  0.53500000   0.82391843
  0.53500000   0.82391967
  0.53500000   0.82392091
  0.53500000   0.82392215
  0.53500000   0.82392339
  0.53500000   0.82392463
  0.53500000   0.82392586
  0.53500000   0.82392709
  0.53500000   0.82392832
  0.53500000   0.82392955
  0.53500000   0.82393077
  0.53500000   0.82393200
  0.53500000   0.82393322
  0.53500000   0.82393444
  0.53500000   0.82393566
  0.53500000   0.82393687
  0.53500000   0.82393809
  0.53500000   0.82393930
  0.53500000   0.82394051
  0.53500000   0.82394172
  0.53500000   0.82394293
  0.53500000   0.82394413
  0.53500000   0.82394533
  0.53500000   0.82394653
  0.53500000   0.82394773
  0.53500000   0.82394893
  0.53500000   0.82395013
  0.53500000   0.82395132
  0.53500000   0.82395251
  0.53500000   0.82395370
  0.53500000   0.82395489
  0.53500000   0.82395608
  0.53500000   0.82395726
  0.53550000   0.82391992
  0.53550000   0.82392117
  0.53550000   0.82392242
  0.53550000   0.82392367
  0.53550000   0.82392492
  0.53550000   0.82392616
  0.53550000   0.82392740
  0.53550000   0.82392864
  0.53550000   0.82392988
  0.53550000   0.82393112
  0.53550000   0.82393236
  0.53550000   0.82393359
  0.53550000   0.82393482
  0.53550000   0.82393605
  0.53550000   0.82393727
  0.53550000   0.82393850
  0.53550000   0.82393972
  0.53550000   0.82394094
  0.53550000   0.82394216
  0.53550000   0.82394338
  0.53550000   0.82394460
  0.53550000   0.82394581
  0.53550000   0.82394702
  0.53550000   0.82394823
  0.53550000   0.82394944
  0.53550000   0.82395064
  0.53550000   0.82395185
  0.53550000   0.82395305
  0.53550000   0.82395425
  0.53550000   0.82395545
  0.53550000   0.82395665
  0.53550000   0.82395784
  0.53550000   0.82395903
  0.53550000   0.82396023
  0.53550000   0.82396141
  0.53550000   0.82396260
  0.53550000   0.82396379
  0.53550000   0.82396497
  0.53550000   0.82396615
  0.53550000   0.82396733
  0.53600000   0.82393012
  0.53600000   0.82393137
  0.53600000   0.82393262
  0.53600000   0.82393386
  0.53600000   0.82393510
  0.53600000   0.82393634
  0.53600000   0.82393758
  0.53600000   0.82393882
  0.53600000   0.82394005
  0.53600000   0.82394128
  0.53600000   0.82394251
  0.53600000   0.82394374
  0.53600000   0.82394497
  0.53600000   0.82394619
  0.53600000   0.82394741
  0.53600000   0.82394863
  0.53600000   0.82394985
  0.53600000   0.82395107
  0.53600000   0.82395229
  0.53600000   0.82395350
  0.53600000   0.82395471
  0.53600000   0.82395592
  0.53600000   0.82395713
  0.53600000   0.82395833
  0.53600000   0.82395953
  0.53600000   0.82396074
  0.53600000   0.82396193
  0.53600000   0.82396313
  0.53600000   0.82396433
  0.53600000   0.82396552
  0.53600000   0.82396671
  0.53600000   0.82396791
  0.53600000   0.82396909
  0.53600000   0.82397028
  0.53600000   0.82397146
  0.53600000   0.82397265
  0.53600000   0.82397383
  0.53600000   0.82397501
  0.53600000   0.82397619
  0.53600000   0.82397736
  0.53650000   0.82394028
  0.53650000   0.82394152
  0.53650000   0.82394277
  0.53650000   0.82394401
  0.53650000   0.82394524
  0.53650000   0.82394648
  0.53650000   0.82394771
  0.53650000   0.82394894
  0.53650000   0.82395017
  0.53650000   0.82395140
  0.53650000   0.82395263
  0.53650000   0.82395385
  0.53650000   0.82395507
  0.53650000   0.82395629
  0.53650000   0.82395751
  0.53650000   0.82395873
  0.53650000   0.82395994
  0.53650000   0.82396115
  0.53650000   0.82396236
  0.53650000   0.82396357
  0.53650000   0.82396478
  0.53650000   0.82396598
  0.53650000   0.82396719
  0.53650000   0.82396839
  0.53650000   0.82396958
  0.53650000   0.82397078
  0.53650000   0.82397198
  0.53650000   0.82397317
  0.53650000   0.82397436
  0.53650000   0.82397555
  0.53650000   0.82397674
  0.53650000   0.82397793
  0.53650000   0.82397911
  0.53650000   0.82398029
  0.53650000   0.82398147
  0.53650000   0.82398265
  0.53650000   0.82398383
  0.53650000   0.82398500
  0.53650000   0.82398618
  0.53650000   0.82398735
  0.53700000   0.82395040
  0.53700000   0.82395164
  0.53700000   0.82395287
  0.53700000   0.82395411
  0.53700000   0.82395534
  0.53700000   0.82395657
  0.53700000   0.82395780
  0.53700000   0.82395903
  0.53700000   0.82396025
  0.53700000   0.82396148
  0.53700000   0.82396270
  0.53700000   0.82396392
  0.53700000   0.82396513
  0.53700000   0.82396635
  0.53700000   0.82396756
  0.53700000   0.82396877
  0.53700000   0.82396998
  0.53700000   0.82397119
  0.53700000   0.82397240
  0.53700000   0.82397360
  0.53700000   0.82397480
  0.53700000   0.82397600
  0.53700000   0.82397720
  0.53700000   0.82397840
  0.53700000   0.82397959
  0.53700000   0.82398078
  0.53700000   0.82398198
  0.53700000   0.82398316
  0.53700000   0.82398435
  0.53700000   0.82398554
  0.53700000   0.82398672
  0.53700000   0.82398790
  0.53700000   0.82398908
  0.53700000   0.82399026
  0.53700000   0.82399144
  0.53700000   0.82399261
  0.53700000   0.82399378
  0.53700000   0.82399495
  0.53700000   0.82399612
  0.53700000   0.82399729
  0.53750000   0.82396047
  0.53750000   0.82396170
  0.53750000   0.82396294
  0.53750000   0.82396417
  0.53750000   0.82396539
  0.53750000   0.82396662
  0.53750000   0.82396785
  0.53750000   0.82396907
  0.53750000   0.82397029
  0.53750000   0.82397151
  0.53750000   0.82397272
  0.53750000   0.82397394
  0.53750000   0.82397515
  0.53750000   0.82397636
  0.53750000   0.82397757
  0.53750000   0.82397878
  0.53750000   0.82397998
  0.53750000   0.82398119
  0.53750000   0.82398239
  0.53750000   0.82398359
  0.53750000   0.82398478
  0.53750000   0.82398598
  0.53750000   0.82398717
  0.53750000   0.82398837
  0.53750000   0.82398956
  0.53750000   0.82399074
  0.53750000   0.82399193
  0.53750000   0.82399312
  0.53750000   0.82399430
  0.53750000   0.82399548
  0.53750000   0.82399666
  0.53750000   0.82399784
  0.53750000   0.82399901
  0.53750000   0.82400018
  0.53750000   0.82400136
  0.53750000   0.82400253
  0.53750000   0.82400369
  0.53750000   0.82400486
  0.53750000   0.82400602
  0.53750000   0.82400719
  0.53800000   0.82397050
  0.53800000   0.82397173
  0.53800000   0.82397295
  0.53800000   0.82397418
  0.53800000   0.82397540
  0.53800000   0.82397663
  0.53800000   0.82397785
  0.53800000   0.82397906
  0.53800000   0.82398028
  0.53800000   0.82398149
  0.53800000   0.82398271
  0.53800000   0.82398392
  0.53800000   0.82398513
  0.53800000   0.82398633
  0.53800000   0.82398754
  0.53800000   0.82398874
  0.53800000   0.82398994
  0.53800000   0.82399114
  0.53800000   0.82399234
  0.53800000   0.82399353
  0.53800000   0.82399472
  0.53800000   0.82399591
  0.53800000   0.82399710
  0.53800000   0.82399829
  0.53800000   0.82399948
  0.53800000   0.82400066
  0.53800000   0.82400184
  0.53800000   0.82400302
  0.53800000   0.82400420
  0.53800000   0.82400538
  0.53800000   0.82400655
  0.53800000   0.82400773
  0.53800000   0.82400890
  0.53800000   0.82401007
  0.53800000   0.82401123
  0.53800000   0.82401240
  0.53800000   0.82401356
  0.53800000   0.82401472
  0.53800000   0.82401588
  0.53800000   0.82401704
  0.53850000   0.82398048
  0.53850000   0.82398171
  0.53850000   0.82398293
  0.53850000   0.82398415
  0.53850000   0.82398537
  0.53850000   0.82398659
  0.53850000   0.82398780
  0.53850000   0.82398902
  0.53850000   0.82399023
  0.53850000   0.82399144
  0.53850000   0.82399265
  0.53850000   0.82399385
  0.53850000   0.82399506
  0.53850000   0.82399626
  0.53850000   0.82399746
  0.53850000   0.82399866
  0.53850000   0.82399985
  0.53850000   0.82400105
  0.53850000   0.82400224
  0.53850000   0.82400343
  0.53850000   0.82400462
  0.53850000   0.82400581
  0.53850000   0.82400699
  0.53850000   0.82400817
  0.53850000   0.82400936
  0.53850000   0.82401053
  0.53850000   0.82401171
  0.53850000   0.82401289
  0.53850000   0.82401406
  0.53850000   0.82401523
  0.53850000   0.82401640
  0.53850000   0.82401757
  0.53850000   0.82401874
  0.53850000   0.82401990
  0.53850000   0.82402107
  0.53850000   0.82402223
  0.53850000   0.82402339
  0.53850000   0.82402455
  0.53850000   0.82402570
  0.53850000   0.82402686
  0.53900000   0.82399042
  0.53900000   0.82399164
  0.53900000   0.82399286
  0.53900000   0.82399408
  0.53900000   0.82399530
  0.53900000   0.82399651
  0.53900000   0.82399772
  0.53900000   0.82399893
  0.53900000   0.82400013
  0.53900000   0.82400134
  0.53900000   0.82400254
  0.53900000   0.82400374
  0.53900000   0.82400494
  0.53900000   0.82400614
  0.53900000   0.82400734
  0.53900000   0.82400853
  0.53900000   0.82400972
  0.53900000   0.82401091
  0.53900000   0.82401210
  0.53900000   0.82401329
  0.53900000   0.82401447
  0.53900000   0.82401565
  0.53900000   0.82401683
  0.53900000   0.82401801
  0.53900000   0.82401919
  0.53900000   0.82402037
  0.53900000   0.82402154
  0.53900000   0.82402271
  0.53900000   0.82402388
  0.53900000   0.82402505
  0.53900000   0.82402621
  0.53900000   0.82402738
  0.53900000   0.82402854
  0.53900000   0.82402970
  0.53900000   0.82403086
  0.53900000   0.82403202
  0.53900000   0.82403317
  0.53900000   0.82403432
  0.53900000   0.82403548
  0.53900000   0.82403663
  0.53950000   0.82400032
  0.53950000   0.82400154
  0.53950000   0.82400275
  0.53950000   0.82400397
  0.53950000   0.82400518
  0.53950000   0.82400638
  0.53950000   0.82400759
  0.53950000   0.82400880
  0.53950000   0.82401000
  0.53950000   0.82401120
  0.53950000   0.82401240
  0.53950000   0.82401359
  0.53950000   0.82401479
  0.53950000   0.82401598
  0.53950000   0.82401717
  0.53950000   0.82401836
  0.53950000   0.82401955
  0.53950000   0.82402074
  0.53950000   0.82402192
  0.53950000   0.82402310
  0.53950000   0.82402428
  0.53950000   0.82402546
  0.53950000   0.82402664
  0.53950000   0.82402781
  0.53950000   0.82402898
  0.53950000   0.82403015
  0.53950000   0.82403132
  0.53950000   0.82403249
  0.53950000   0.82403365
  0.53950000   0.82403482
  0.53950000   0.82403598
  0.53950000   0.82403714
  0.53950000   0.82403830
  0.53950000   0.82403945
  0.53950000   0.82404061
  0.53950000   0.82404176
  0.53950000   0.82404291
  0.53950000   0.82404406
  0.53950000   0.82404521
  0.53950000   0.82404635
  0.54000000   0.82401018
  0.54000000   0.82401139
  0.54000000   0.82401260
  0.54000000   0.82401381
  0.54000000   0.82401501
  0.54000000   0.82401622
  0.54000000   0.82401742
  0.54000000   0.82401862
  0.54000000   0.82401982
  0.54000000   0.82402101
  0.54000000   0.82402221
  0.54000000   0.82402340
  0.54000000   0.82402459
  0.54000000   0.82402578
  0.54000000   0.82402697
  0.54000000   0.82402815
  0.54000000   0.82402934
  0.54000000   0.82403052
  0.54000000   0.82403170
  0.54000000   0.82403287
  0.54000000   0.82403405
  0.54000000   0.82403522
  0.54000000   0.82403639
  0.54000000   0.82403756
  0.54000000   0.82403873
  0.54000000   0.82403990
  0.54000000   0.82404106
  0.54000000   0.82404223
  0.54000000   0.82404339
  0.54000000   0.82404455
  0.54000000   0.82404570
  0.54000000   0.82404686
  0.54000000   0.82404801
  0.54000000   0.82404916
  0.54000000   0.82405031
  0.54000000   0.82405146
  0.54000000   0.82405261
  0.54000000   0.82405375
  0.54000000   0.82405490
  0.54000000   0.82405604
  0.54050000   0.82401999
  0.54050000   0.82402120
  0.54050000   0.82402240
  0.54050000   0.82402361
  0.54050000   0.82402481
  0.54050000   0.82402601
  0.54050000   0.82402721
  0.54050000   0.82402840
  0.54050000   0.82402960
  0.54050000   0.82403079
  0.54050000   0.82403198
  0.54050000   0.82403317
  0.54050000   0.82403435
  0.54050000   0.82403554
  0.54050000   0.82403672
  0.54050000   0.82403790
  0.54050000   0.82403908
  0.54050000   0.82404025
  0.54050000   0.82404143
  0.54050000   0.82404260
  0.54050000   0.82404377
  0.54050000   0.82404494
  0.54050000   0.82404611
  0.54050000   0.82404728
  0.54050000   0.82404844
  0.54050000   0.82404960
  0.54050000   0.82405076
  0.54050000   0.82405192
  0.54050000   0.82405308
  0.54050000   0.82405423
  0.54050000   0.82405539
  0.54050000   0.82405654
  0.54050000   0.82405769
  0.54050000   0.82405883
  0.54050000   0.82405998
  0.54050000   0.82406112
  0.54050000   0.82406227
  0.54050000   0.82406341
  0.54050000   0.82406455
  0.54050000   0.82406568
  0.54100000   0.82402976
  0.54100000   0.82403097
  0.54100000   0.82403217
  0.54100000   0.82403337
  0.54100000   0.82403456
  0.54100000   0.82403576
  0.54100000   0.82403695
  0.54100000   0.82403814
  0.54100000   0.82403933
  0.54100000   0.82404052
  0.54100000   0.82404170
  0.54100000   0.82404289
  0.54100000   0.82404407
  0.54100000   0.82404525
  0.54100000   0.82404643
  0.54100000   0.82404760
  0.54100000   0.82404878
  0.54100000   0.82404995
  0.54100000   0.82405112
  0.54100000   0.82405229
  0.54100000   0.82405346
  0.54100000   0.82405462
  0.54100000   0.82405578
  0.54100000   0.82405695
  0.54100000   0.82405811
  0.54100000   0.82405926
  0.54100000   0.82406042
  0.54100000   0.82406157
  0.54100000   0.82406273
  0.54100000   0.82406388
  0.54100000   0.82406503
  0.54100000   0.82406617
  0.54100000   0.82406732
  0.54100000   0.82406846
  0.54100000   0.82406960
  0.54100000   0.82407074
  0.54100000   0.82407188
  0.54100000   0.82407302
  0.54100000   0.82407415
  0.54100000   0.82407528
  0.54150000   0.82403949
  0.54150000   0.82404069
  0.54150000   0.82404189
  0.54150000   0.82404308
  0.54150000   0.82404427
  0.54150000   0.82404546
  0.54150000   0.82404665
  0.54150000   0.82404784
  0.54150000   0.82404902
  0.54150000   0.82405021
  0.54150000   0.82405139
  0.54150000   0.82405257
  0.54150000   0.82405375
  0.54150000   0.82405492
  0.54150000   0.82405609
  0.54150000   0.82405727
  0.54150000   0.82405844
  0.54150000   0.82405960
  0.54150000   0.82406077
  0.54150000   0.82406194
  0.54150000   0.82406310
  0.54150000   0.82406426
  0.54150000   0.82406542
  0.54150000   0.82406657
  0.54150000   0.82406773
  0.54150000   0.82406888
  0.54150000   0.82407003
  0.54150000   0.82407118
  0.54150000   0.82407233
  0.54150000   0.82407348
  0.54150000   0.82407462
  0.54150000   0.82407577
  0.54150000   0.82407691
  0.54150000   0.82407805
  0.54150000   0.82407918
  0.54150000   0.82408032
  0.54150000   0.82408145
  0.54150000   0.82408258
  0.54150000   0.82408372
  0.54150000   0.82408484
  0.54200000   0.82404918
  0.54200000   0.82405037
  0.54200000   0.82405156
  0.54200000   0.82405275
  0.54200000   0.82405394
  0.54200000   0.82405513
  0.54200000   0.82405631
  0.54200000   0.82405750
  0.54200000   0.82405868
  0.54200000   0.82405985
  0.54200000   0.82406103
  0.54200000   0.82406221
  0.54200000   0.82406338
  0.54200000   0.82406455
  0.54200000   0.82406572
  0.54200000   0.82406689
  0.54200000   0.82406805
  0.54200000   0.82406922
  0.54200000   0.82407038
  0.54200000   0.82407154
  0.54200000   0.82407270
  0.54200000   0.82407385
  0.54200000   0.82407501
  0.54200000   0.82407616
  0.54200000   0.82407731
  0.54200000   0.82407846
  0.54200000   0.82407961
  0.54200000   0.82408075
  0.54200000   0.82408190
  0.54200000   0.82408304
  0.54200000   0.82408418
  0.54200000   0.82408532
  0.54200000   0.82408645
  0.54200000   0.82408759
  0.54200000   0.82408872
  0.54200000   0.82408985
  0.54200000   0.82409098
  0.54200000   0.82409211
  0.54200000   0.82409324
  0.54200000   0.82409436
  0.54250000   0.82405882
  0.54250000   0.82406001
  0.54250000   0.82406120
  0.54250000   0.82406239
  0.54250000   0.82406357
  0.54250000   0.82406475
  0.54250000   0.82406593
  0.54250000   0.82406711
  0.54250000   0.82406829
  0.54250000   0.82406946
  0.54250000   0.82407063
  0.54250000   0.82407180
  0.54250000   0.82407297
  0.54250000   0.82407414
  0.54250000   0.82407530
  0.54250000   0.82407647
  0.54250000   0.82407763
  0.54250000   0.82407879
  0.54250000   0.82407994
  0.54250000   0.82408110
  0.54250000   0.82408225
  0.54250000   0.82408341
  0.54250000   0.82408456
  0.54250000   0.82408571
  0.54250000   0.82408685
  0.54250000   0.82408800
  0.54250000   0.82408914
  0.54250000   0.82409028
  0.54250000   0.82409142
  0.54250000   0.82409256
  0.54250000   0.82409369
  0.54250000   0.82409483
  0.54250000   0.82409596
  0.54250000   0.82409709
  0.54250000   0.82409822
  0.54250000   0.82409935
  0.54250000   0.82410047
  0.54250000   0.82410160
  0.54250000   0.82410272
  0.54250000   0.82410384
  0.54300000   0.82406843
  0.54300000   0.82406961
  0.54300000   0.82407079
  0.54300000   0.82407198
  0.54300000   0.82407316
  0.54300000   0.82407433
  0.54300000   0.82407551
  0.54300000   0.82407668
  0.54300000   0.82407785
  0.54300000   0.82407902
  0.54300000   0.82408019
  0.54300000   0.82408136
  0.54300000   0.82408252
  0.54300000   0.82408368
  0.54300000   0.82408485
  0.54300000   0.82408600
  0.54300000   0.82408716
  0.54300000   0.82408832
  0.54300000   0.82408947
  0.54300000   0.82409062
  0.54300000   0.82409177
  0.54300000   0.82409292
  0.54300000   0.82409406
  0.54300000   0.82409521
  0.54300000   0.82409635
  0.54300000   0.82409749
  0.54300000   0.82409863
  0.54300000   0.82409977
  0.54300000   0.82410090
  0.54300000   0.82410204
  0.54300000   0.82410317
  0.54300000   0.82410430
  0.54300000   0.82410543
  0.54300000   0.82410655
  0.54300000   0.82410768
  0.54300000   0.82410880
  0.54300000   0.82410992
  0.54300000   0.82411104
  0.54300000   0.82411216
  0.54300000   0.82411327
  0.54350000   0.82407799
  0.54350000   0.82407917
  0.54350000   0.82408035
  0.54350000   0.82408152
  0.54350000   0.82408270
  0.54350000   0.82408387
  0.54350000   0.82408504
  0.54350000   0.82408621
  0.54350000   0.82408738
  0.54350000   0.82408855
  0.54350000   0.82408971
  0.54350000   0.82409087
  0.54350000   0.82409203
  0.54350000   0.82409319
  0.54350000   0.82409435
  0.54350000   0.82409550
  0.54350000   0.82409665
  0.54350000   0.82409780
  0.54350000   0.82409895
  0.54350000   0.82410010
  0.54350000   0.82410125
  0.54350000   0.82410239
  0.54350000   0.82410353
  0.54350000   0.82410467
  0.54350000   0.82410581
  0.54350000   0.82410695
  0.54350000   0.82410808
  0.54350000   0.82410921
  0.54350000   0.82411034
  0.54350000   0.82411147
  0.54350000   0.82411260
  0.54350000   0.82411373
  0.54350000   0.82411485
  0.54350000   0.82411597
  0.54350000   0.82411709
  0.54350000   0.82411821
  0.54350000   0.82411933
  0.54350000   0.82412044
  0.54350000   0.82412156
  0.54350000   0.82412267
  0.54400000   0.82408751
  0.54400000   0.82408868
  0.54400000   0.82408986
  0.54400000   0.82409103
  0.54400000   0.82409220
  0.54400000   0.82409337
  0.54400000   0.82409454
  0.54400000   0.82409570
  0.54400000   0.82409687
  0.54400000   0.82409803
  0.54400000   0.82409919
  0.54400000   0.82410034
  0.54400000   0.82410150
  0.54400000   0.82410265
  0.54400000   0.82410381
  0.54400000   0.82410496
  0.54400000   0.82410610
  0.54400000   0.82410725
  0.54400000   0.82410839
  0.54400000   0.82410954
  0.54400000   0.82411068
  0.54400000   0.82411182
  0.54400000   0.82411296
  0.54400000   0.82411409
  0.54400000   0.82411523
  0.54400000   0.82411636
  0.54400000   0.82411749
  0.54400000   0.82411862
  0.54400000   0.82411974
  0.54400000   0.82412087
  0.54400000   0.82412199
  0.54400000   0.82412311
  0.54400000   0.82412423
  0.54400000   0.82412535
  0.54400000   0.82412647
  0.54400000   0.82412758
  0.54400000   0.82412870
  0.54400000   0.82412981
  0.54400000   0.82413092
  0.54400000   0.82413202
  0.54450000   0.82409699
  0.54450000   0.82409816
  0.54450000   0.82409933
  0.54450000   0.82410050
  0.54450000   0.82410166
  0.54450000   0.82410283
  0.54450000   0.82410399
  0.54450000   0.82410515
  0.54450000   0.82410631
  0.54450000   0.82410747
  0.54450000   0.82410862
  0.54450000   0.82410977
  0.54450000   0.82411093
  0.54450000   0.82411208
  0.54450000   0.82411322
  0.54450000   0.82411437
  0.54450000   0.82411551
  0.54450000   0.82411666
  0.54450000   0.82411780
  0.54450000   0.82411893
  0.54450000   0.82412007
  0.54450000   0.82412121
  0.54450000   0.82412234
  0.54450000   0.82412347
  0.54450000   0.82412460
  0.54450000   0.82412573
  0.54450000   0.82412686
  0.54450000   0.82412798
  0.54450000   0.82412910
  0.54450000   0.82413022
  0.54450000   0.82413134
  0.54450000   0.82413246
  0.54450000   0.82413358
  0.54450000   0.82413469
  0.54450000   0.82413580
  0.54450000   0.82413691
  0.54450000   0.82413802
  0.54450000   0.82413913
  0.54450000   0.82414023
  0.54450000   0.82414134
  0.54500000   0.82410643
  0.54500000   0.82410759
  0.54500000   0.82410876
  0.54500000   0.82410992
  0.54500000   0.82411108
  0.54500000   0.82411224
  0.54500000   0.82411340
  0.54500000   0.82411456
  0.54500000   0.82411571
  0.54500000   0.82411687
  0.54500000   0.82411802
  0.54500000   0.82411917
  0.54500000   0.82412031
  0.54500000   0.82412146
  0.54500000   0.82412260
  0.54500000   0.82412374
  0.54500000   0.82412488
  0.54500000   0.82412602
  0.54500000   0.82412716
  0.54500000   0.82412829
  0.54500000   0.82412942
  0.54500000   0.82413055
  0.54500000   0.82413168
  0.54500000   0.82413281
  0.54500000   0.82413394
  0.54500000   0.82413506
  0.54500000   0.82413618
  0.54500000   0.82413730
  0.54500000   0.82413842
  0.54500000   0.82413954
  0.54500000   0.82414065
  0.54500000   0.82414177
  0.54500000   0.82414288
  0.54500000   0.82414399
  0.54500000   0.82414510
  0.54500000   0.82414620
  0.54500000   0.82414731
  0.54500000   0.82414841
  0.54500000   0.82414951
  0.54500000   0.82415061
  0.54550000   0.82411582
  0.54550000   0.82411699
  0.54550000   0.82411815
  0.54550000   0.82411931
  0.54550000   0.82412046
  0.54550000   0.82412162
  0.54550000   0.82412277
  0.54550000   0.82412393
  0.54550000   0.82412508
  0.54550000   0.82412622
  0.54550000   0.82412737
  0.54550000   0.82412851
  0.54550000   0.82412966
  0.54550000   0.82413080
  0.54550000   0.82413194
  0.54550000   0.82413308
  0.54550000   0.82413421
  0.54550000   0.82413534
  0.54550000   0.82413648
  0.54550000   0.82413761
  0.54550000   0.82413874
  0.54550000   0.82413986
  0.54550000   0.82414099
  0.54550000   0.82414211
  0.54550000   0.82414323
  0.54550000   0.82414435
  0.54550000   0.82414547
  0.54550000   0.82414658
  0.54550000   0.82414770
  0.54550000   0.82414881
  0.54550000   0.82414992
  0.54550000   0.82415103
  0.54550000   0.82415214
  0.54550000   0.82415324
  0.54550000   0.82415435
  0.54550000   0.82415545
  0.54550000   0.82415655
  0.54550000   0.82415765
  0.54550000   0.82415875
  0.54550000   0.82415984
  0.54600000   0.82412518
  0.54600000   0.82412634
  0.54600000   0.82412749
  0.54600000   0.82412865
  0.54600000   0.82412980
  0.54600000   0.82413095
  0.54600000   0.82413210
  0.54600000   0.82413325
  0.54600000   0.82413440
  0.54600000   0.82413554
  0.54600000   0.82413668
  0.54600000   0.82413782
  0.54600000   0.82413896
  0.54600000   0.82414010
  0.54600000   0.82414123
  0.54600000   0.82414237
  0.54600000   0.82414350
  0.54600000   0.82414463
  0.54600000   0.82414576
  0.54600000   0.82414688
  0.54600000   0.82414801
  0.54600000   0.82414913
  0.54600000   0.82415025
  0.54600000   0.82415137
  0.54600000   0.82415249
  0.54600000   0.82415360
  0.54600000   0.82415471
  0.54600000   0.82415583
  0.54600000   0.82415694
  0.54600000   0.82415805
  0.54600000   0.82415915
  0.54600000   0.82416026
  0.54600000   0.82416136
  0.54600000   0.82416246
  0.54600000   0.82416356
  0.54600000   0.82416466
  0.54600000   0.82416576
  0.54600000   0.82416685
  0.54600000   0.82416794
  0.54600000   0.82416903
  0.54650000   0.82413449
  0.54650000   0.82413565
  0.54650000   0.82413680
  0.54650000   0.82413795
  0.54650000   0.82413910
  0.54650000   0.82414025
  0.54650000   0.82414139
  0.54650000   0.82414254
  0.54650000   0.82414368
  0.54650000   0.82414482
  0.54650000   0.82414596
  0.54650000   0.82414709
  0.54650000   0.82414823
  0.54650000   0.82414936
  0.54650000   0.82415049
  0.54650000   0.82415162
  0.54650000   0.82415275
  0.54650000   0.82415387
  0.54650000   0.82415500
  0.54650000   0.82415612
  0.54650000   0.82415724
  0.54650000   0.82415836
  0.54650000   0.82415947
  0.54650000   0.82416059
  0.54650000   0.82416170
  0.54650000   0.82416281
  0.54650000   0.82416392
  0.54650000   0.82416503
  0.54650000   0.82416613
  0.54650000   0.82416724
  0.54650000   0.82416834
  0.54650000   0.82416944
  0.54650000   0.82417054
  0.54650000   0.82417164
  0.54650000   0.82417273
  0.54650000   0.82417383
  0.54650000   0.82417492
  0.54650000   0.82417601
  0.54650000   0.82417710
  0.54650000   0.82417819
  0.54700000   0.82414377
  0.54700000   0.82414492
  0.54700000   0.82414607
  0.54700000   0.82414722
  0.54700000   0.82414836
  0.54700000   0.82414950
  0.54700000   0.82415064
  0.54700000   0.82415178
  0.54700000   0.82415292
  0.54700000   0.82415406
  0.54700000   0.82415519
  0.54700000   0.82415632
  0.54700000   0.82415745
  0.54700000   0.82415858
  0.54700000   0.82415971
  0.54700000   0.82416083
  0.54700000   0.82416195
  0.54700000   0.82416308
  0.54700000   0.82416419
  0.54700000   0.82416531
  0.54700000   0.82416643
  0.54700000   0.82416754
  0.54700000   0.82416865
  0.54700000   0.82416977
  0.54700000   0.82417087
  0.54700000   0.82417198
  0.54700000   0.82417309
  0.54700000   0.82417419
  0.54700000   0.82417529
  0.54700000   0.82417639
  0.54700000   0.82417749
  0.54700000   0.82417859
  0.54700000   0.82417968
  0.54700000   0.82418078
  0.54700000   0.82418187
  0.54700000   0.82418296
  0.54700000   0.82418405
  0.54700000   0.82418513
  0.54700000   0.82418622
  0.54700000   0.82418730
  0.54750000   0.82415301
  0.54750000   0.82415415
  0.54750000   0.82415530
  0.54750000   0.82415644
  0.54750000   0.82415758
  0.54750000   0.82415872
  0.54750000   0.82415985
  0.54750000   0.82416099
  0.54750000   0.82416212
  0.54750000   0.82416325
  0.54750000   0.82416438
  0.54750000   0.82416551
  0.54750000   0.82416664
  0.54750000   0.82416776
  0.54750000   0.82416888
  0.54750000   0.82417000
  0.54750000   0.82417112
  0.54750000   0.82417224
  0.54750000   0.82417335
  0.54750000   0.82417447
  0.54750000   0.82417558
  0.54750000   0.82417669
  0.54750000   0.82417780
  0.54750000   0.82417890
  0.54750000   0.82418001
  0.54750000   0.82418111
  0.54750000   0.82418221
  0.54750000   0.82418331
  0.54750000   0.82418441
  0.54750000   0.82418551
  0.54750000   0.82418660
  0.54750000   0.82418769
  0.54750000   0.82418878
  0.54750000   0.82418987
  0.54750000   0.82419096
  0.54750000   0.82419205
  0.54750000   0.82419313
  0.54750000   0.82419421
  0.54750000   0.82419529
  0.54750000   0.82419637
  0.54800000   0.82416220
  0.54800000   0.82416334
  0.54800000   0.82416448
  0.54800000   0.82416562
  0.54800000   0.82416676
  0.54800000   0.82416789
  0.54800000   0.82416902
  0.54800000   0.82417015
  0.54800000   0.82417128
  0.54800000   0.82417241
  0.54800000   0.82417354
  0.54800000   0.82417466
  0.54800000   0.82417578
  0.54800000   0.82417690
  0.54800000   0.82417802
  0.54800000   0.82417914
  0.54800000   0.82418025
  0.54800000   0.82418136
  0.54800000   0.82418247
  0.54800000   0.82418358
  0.54800000   0.82418469
  0.54800000   0.82418580
  0.54800000   0.82418690
  0.54800000   0.82418800
  0.54800000   0.82418910
  0.54800000   0.82419020
  0.54800000   0.82419130
  0.54800000   0.82419239
  0.54800000   0.82419349
  0.54800000   0.82419458
  0.54800000   0.82419567
  0.54800000   0.82419676
  0.54800000   0.82419785
  0.54800000   0.82419893
  0.54800000   0.82420001
  0.54800000   0.82420110
  0.54800000   0.82420218
  0.54800000   0.82420325
  0.54800000   0.82420433
  0.54800000   0.82420541
  0.54850000   0.82417136
  0.54850000   0.82417249
  0.54850000   0.82417363
  0.54850000   0.82417476
  0.54850000   0.82417590
  0.54850000   0.82417703
  0.54850000   0.82417815
  0.54850000   0.82417928
  0.54850000   0.82418041
  0.54850000   0.82418153
  0.54850000   0.82418265
  0.54850000   0.82418377
  0.54850000   0.82418489
  0.54850000   0.82418600
  0.54850000   0.82418712
  0.54850000   0.82418823
  0.54850000   0.82418934
  0.54850000   0.82419045
  0.54850000   0.82419155
  0.54850000   0.82419266
  0.54850000   0.82419376
  0.54850000   0.82419486
  0.54850000   0.82419596
  0.54850000   0.82419706
  0.54850000   0.82419816
  0.54850000   0.82419925
  0.54850000   0.82420035
  0.54850000   0.82420144
  0.54850000   0.82420253
  0.54850000   0.82420362
  0.54850000   0.82420470
  0.54850000   0.82420579
  0.54850000   0.82420687
  0.54850000   0.82420795
  0.54850000   0.82420903
  0.54850000   0.82421011
  0.54850000   0.82421118
  0.54850000   0.82421226
  0.54850000   0.82421333
  0.54850000   0.82421440
  0.54900000   0.82418047
  0.54900000   0.82418161
  0.54900000   0.82418274
  0.54900000   0.82418387
  0.54900000   0.82418499
  0.54900000   0.82418612
  0.54900000   0.82418724
  0.54900000   0.82418837
  0.54900000   0.82418949
  0.54900000   0.82419061
  0.54900000   0.82419172
  0.54900000   0.82419284
  0.54900000   0.82419395
  0.54900000   0.82419506
  0.54900000   0.82419617
  0.54900000   0.82419728
  0.54900000   0.82419839
  0.54900000   0.82419949
  0.54900000   0.82420059
  0.54900000   0.82420170
  0.54900000   0.82420279
  0.54900000   0.82420389
  0.54900000   0.82420499
  0.54900000   0.82420608
  0.54900000   0.82420717
  0.54900000   0.82420827
  0.54900000   0.82420935
  0.54900000   0.82421044
  0.54900000   0.82421153
  0.54900000   0.82421261
  0.54900000   0.82421369
  0.54900000   0.82421477
  0.54900000   0.82421585
  0.54900000   0.82421693
  0.54900000   0.82421800
  0.54900000   0.82421908
  0.54900000   0.82422015
  0.54900000   0.82422122
  0.54900000   0.82422229
  0.54900000   0.82422336
  0.54950000   0.82418955
  0.54950000   0.82419068
  0.54950000   0.82419181
  0.54950000   0.82419293
  0.54950000   0.82419405
  0.54950000   0.82419518
  0.54950000   0.82419630
  0.54950000   0.82419741
  0.54950000   0.82419853
  0.54950000   0.82419964
  0.54950000   0.82420076
  0.54950000   0.82420187
  0.54950000   0.82420298
  0.54950000   0.82420409
  0.54950000   0.82420519
  0.54950000   0.82420629
  0.54950000   0.82420740
  0.54950000   0.82420850
  0.54950000   0.82420960
  0.54950000   0.82421069
  0.54950000   0.82421179
  0.54950000   0.82421288
  0.54950000   0.82421397
  0.54950000   0.82421506
  0.54950000   0.82421615
  0.54950000   0.82421724
  0.54950000   0.82421832
  0.54950000   0.82421941
  0.54950000   0.82422049
  0.54950000   0.82422157
  0.54950000   0.82422265
  0.54950000   0.82422372
  0.54950000   0.82422480
  0.54950000   0.82422587
  0.54950000   0.82422694
  0.54950000   0.82422801
  0.54950000   0.82422908
  0.54950000   0.82423014
  0.54950000   0.82423121
  0.54950000   0.82423227
  0.55000000   0.82419859
  0.55000000   0.82419971
  0.55000000   0.82420083
  0.55000000   0.82420196
  0.55000000   0.82420307
  0.55000000   0.82420419
  0.55000000   0.82420531
  0.55000000   0.82420642
  0.55000000   0.82420753
  0.55000000   0.82420864
  0.55000000   0.82420975
  0.55000000   0.82421086
  0.55000000   0.82421196
  0.55000000   0.82421307
  0.55000000   0.82421417
  0.55000000   0.82421527
  0.55000000   0.82421637
  0.55000000   0.82421746
  0.55000000   0.82421856
  0.55000000   0.82421965
  0.55000000   0.82422074
  0.55000000   0.82422183
  0.55000000   0.82422292
  0.55000000   0.82422401
  0.55000000   0.82422509
  0.55000000   0.82422617
  0.55000000   0.82422725
  0.55000000   0.82422833
  0.55000000   0.82422941
  0.55000000   0.82423049
  0.55000000   0.82423156
  0.55000000   0.82423263
  0.55000000   0.82423370
  0.55000000   0.82423477
  0.55000000   0.82423584
  0.55000000   0.82423690
  0.55000000   0.82423797
  0.55000000   0.82423903
  0.55000000   0.82424009
  0.55000000   0.82424115
  0.55050000   0.82420758
  0.55050000   0.82420871
  0.55050000   0.82420982
  0.55050000   0.82421094
  0.55050000   0.82421206
  0.55050000   0.82421317
  0.55050000   0.82421428
  0.55050000   0.82421539
  0.55050000   0.82421650
  0.55050000   0.82421760
  0.55050000   0.82421871
  0.55050000   0.82421981
  0.55050000   0.82422091
  0.55050000   0.82422201
  0.55050000   0.82422311
  0.55050000   0.82422421
  0.55050000   0.82422530
  0.55050000   0.82422639
  0.55050000   0.82422748
  0.55050000   0.82422857
  0.55050000   0.82422966
  0.55050000   0.82423074
  0.55050000   0.82423183
  0.55050000   0.82423291
  0.55050000   0.82423399
  0.55050000   0.82423507
  0.55050000   0.82423614
  0.55050000   0.82423722
  0.55050000   0.82423829
  0.55050000   0.82423936
  0.55050000   0.82424043
  0.55050000   0.82424150
  0.55050000   0.82424257
  0.55050000   0.82424363
  0.55050000   0.82424470
  0.55050000   0.82424576
  0.55050000   0.82424682
  0.55050000   0.82424788
  0.55050000   0.82424893
  0.55050000   0.82424999
  0.55100000   0.82421654
  0.55100000   0.82421766
  0.55100000   0.82421877
  0.55100000   0.82421989
  0.55100000   0.82422100
  0.55100000   0.82422211
  0.55100000   0.82422322
  0.55100000   0.82422432
  0.55100000   0.82422542
  0.55100000   0.82422653
  0.55100000   0.82422763
  0.55100000   0.82422873
  0.55100000   0.82422982
  0.55100000   0.82423092
  0.55100000   0.82423201
  0.55100000   0.82423310
  0.55100000   0.82423419
  0.55100000   0.82423528
  0.55100000   0.82423637
  0.55100000   0.82423745
  0.55100000   0.82423853
  0.55100000   0.82423962
  0.55100000   0.82424070
  0.55100000   0.82424177
  0.55100000   0.82424285
  0.55100000   0.82424392
  0.55100000   0.82424500
  0.55100000   0.82424607
  0.55100000   0.82424714
  0.55100000   0.82424820
  0.55100000   0.82424927
  0.55100000   0.82425033
  0.55100000   0.82425140
  0.55100000   0.82425246
  0.55100000   0.82425352
  0.55100000   0.82425458
  0.55100000   0.82425563
  0.55100000   0.82425669
  0.55100000   0.82425774
  0.55100000   0.82425879
  0.55150000   0.82422546
  0.55150000   0.82422658
  0.55150000   0.82422769
  0.55150000   0.82422880
  0.55150000   0.82422990
  0.55150000   0.82423101
  0.55150000   0.82423211
  0.55150000   0.82423321
  0.55150000   0.82423431
  0.55150000   0.82423541
  0.55150000   0.82423651
  0.55150000   0.82423760
  0.55150000   0.82423869
  0.55150000   0.82423978
  0.55150000   0.82424087
  0.55150000   0.82424196
  0.55150000   0.82424305
  0.55150000   0.82424413
  0.55150000   0.82424521
  0.55150000   0.82424629
  0.55150000   0.82424737
  0.55150000   0.82424845
  0.55150000   0.82424953
  0.55150000   0.82425060
  0.55150000   0.82425167
  0.55150000   0.82425274
  0.55150000   0.82425381
  0.55150000   0.82425488
  0.55150000   0.82425594
  0.55150000   0.82425701
  0.55150000   0.82425807
  0.55150000   0.82425913
  0.55150000   0.82426019
  0.55150000   0.82426124
  0.55150000   0.82426230
  0.55150000   0.82426335
  0.55150000   0.82426441
  0.55150000   0.82426546
  0.55150000   0.82426650
  0.55150000   0.82426755
  0.55200000   0.82423435
  0.55200000   0.82423545
  0.55200000   0.82423656
  0.55200000   0.82423766
  0.55200000   0.82423877
  0.55200000   0.82423987
  0.55200000   0.82424097
  0.55200000   0.82424206
  0.55200000   0.82424316
  0.55200000   0.82424425
  0.55200000   0.82424535
  0.55200000   0.82424644
  0.55200000   0.82424753
  0.55200000   0.82424861
  0.55200000   0.82424970
  0.55200000   0.82425078
  0.55200000   0.82425186
  0.55200000   0.82425294
  0.55200000   0.82425402
  0.55200000   0.82425510
  0.55200000   0.82425617
  0.55200000   0.82425725
  0.55200000   0.82425832
  0.55200000   0.82425939
  0.55200000   0.82426045
  0.55200000   0.82426152
  0.55200000   0.82426259
  0.55200000   0.82426365
  0.55200000   0.82426471
  0.55200000   0.82426577
  0.55200000   0.82426683
  0.55200000   0.82426788
  0.55200000   0.82426894
  0.55200000   0.82426999
  0.55200000   0.82427104
  0.55200000   0.82427209
  0.55200000   0.82427314
  0.55200000   0.82427419
  0.55200000   0.82427523
  0.55200000   0.82427628
  0.55250000   0.82424319
  0.55250000   0.82424429
  0.55250000   0.82424539
  0.55250000   0.82424650
  0.55250000   0.82424759
  0.55250000   0.82424869
  0.55250000   0.82424979
  0.55250000   0.82425088
  0.55250000   0.82425197
  0.55250000   0.82425306
  0.55250000   0.82425415
  0.55250000   0.82425523
  0.55250000   0.82425632
  0.55250000   0.82425740
  0.55250000   0.82425848
  0.55250000   0.82425956
  0.55250000   0.82426064
  0.55250000   0.82426172
  0.55250000   0.82426279
  0.55250000   0.82426386
  0.55250000   0.82426493
  0.55250000   0.82426600
  0.55250000   0.82426707
  0.55250000   0.82426814
  0.55250000   0.82426920
  0.55250000   0.82427026
  0.55250000   0.82427132
  0.55250000   0.82427238
  0.55250000   0.82427344
  0.55250000   0.82427450
  0.55250000   0.82427555
  0.55250000   0.82427660
  0.55250000   0.82427765
  0.55250000   0.82427870
  0.55250000   0.82427975
  0.55250000   0.82428079
  0.55250000   0.82428184
  0.55250000   0.82428288
  0.55250000   0.82428392
  0.55250000   0.82428496
  0.55300000   0.82425199
  0.55300000   0.82425309
  0.55300000   0.82425419
  0.55300000   0.82425529
  0.55300000   0.82425638
  0.55300000   0.82425747
  0.55300000   0.82425857
  0.55300000   0.82425966
  0.55300000   0.82426074
  0.55300000   0.82426183
  0.55300000   0.82426291
  0.55300000   0.82426399
  0.55300000   0.82426507
  0.55300000   0.82426615
  0.55300000   0.82426723
  0.55300000   0.82426831
  0.55300000   0.82426938
  0.55300000   0.82427045
  0.55300000   0.82427152
  0.55300000   0.82427259
  0.55300000   0.82427366
  0.55300000   0.82427472
  0.55300000   0.82427579
  0.55300000   0.82427685
  0.55300000   0.82427791
  0.55300000   0.82427897
  0.55300000   0.82428002
  0.55300000   0.82428108
  0.55300000   0.82428213
  0.55300000   0.82428318
  0.55300000   0.82428423
  0.55300000   0.82428528
  0.55300000   0.82428633
  0.55300000   0.82428737
  0.55300000   0.82428842
  0.55300000   0.82428946
  0.55300000   0.82429050
  0.55300000   0.82429154
  0.55300000   0.82429257
  0.55300000   0.82429361
  0.55350000   0.82426076
  0.55350000   0.82426186
  0.55350000   0.82426295
  0.55350000   0.82426404
  0.55350000   0.82426513
  0.55350000   0.82426622
  0.55350000   0.82426731
  0.55350000   0.82426839
  0.55350000   0.82426948
  0.55350000   0.82427056
  0.55350000   0.82427164
  0.55350000   0.82427272
  0.55350000   0.82427379
  0.55350000   0.82427487
  0.55350000   0.82427594
  0.55350000   0.82427701
  0.55350000   0.82427808
  0.55350000   0.82427915
  0.55350000   0.82428022
  0.55350000   0.82428128
  0.55350000   0.82428234
  0.55350000   0.82428340
  0.55350000   0.82428446
  0.55350000   0.82428552
  0.55350000   0.82428658
  0.55350000   0.82428763
  0.55350000   0.82428868
  0.55350000   0.82428974
  0.55350000   0.82429078
  0.55350000   0.82429183
  0.55350000   0.82429288
  0.55350000   0.82429392
  0.55350000   0.82429497
  0.55350000   0.82429601
  0.55350000   0.82429705
  0.55350000   0.82429808
  0.55350000   0.82429912
  0.55350000   0.82430016
  0.55350000   0.82430119
  0.55350000   0.82430222
  0.55400000   0.82426949
  0.55400000   0.82427058
  0.55400000   0.82427167
  0.55400000   0.82427276
  0.55400000   0.82427384
  0.55400000   0.82427493
  0.55400000   0.82427601
  0.55400000   0.82427709
  0.55400000   0.82427817
  0.55400000   0.82427925
  0.55400000   0.82428033
  0.55400000   0.82428140
  0.55400000   0.82428247
  0.55400000   0.82428354
  0.55400000   0.82428461
  0.55400000   0.82428568
  0.55400000   0.82428675
  0.55400000   0.82428781
  0.55400000   0.82428887
  0.55400000   0.82428993
  0.55400000   0.82429099
  0.55400000   0.82429205
  0.55400000   0.82429310
  0.55400000   0.82429416
  0.55400000   0.82429521
  0.55400000   0.82429626
  0.55400000   0.82429731
  0.55400000   0.82429836
  0.55400000   0.82429940
  0.55400000   0.82430044
  0.55400000   0.82430149
  0.55400000   0.82430253
  0.55400000   0.82430357
  0.55400000   0.82430460
  0.55400000   0.82430564
  0.55400000   0.82430667
  0.55400000   0.82430771
  0.55400000   0.82430874
  0.55400000   0.82430977
  0.55400000   0.82431079
  0.55450000   0.82427818
  0.55450000   0.82427927
  0.55450000   0.82428035
  0.55450000   0.82428144
  0.55450000   0.82428252
  0.55450000   0.82428360
  0.55450000   0.82428468
  0.55450000   0.82428576
  0.55450000   0.82428683
  0.55450000   0.82428790
  0.55450000   0.82428898
  0.55450000   0.82429005
  0.55450000   0.82429111
  0.55450000   0.82429218
  0.55450000   0.82429325
  0.55450000   0.82429431
  0.55450000   0.82429537
  0.55450000   0.82429643
  0.55450000   0.82429749
  0.55450000   0.82429855
  0.55450000   0.82429960
  0.55450000   0.82430065
  0.55450000   0.82430171
  0.55450000   0.82430276
  0.55450000   0.82430380
  0.55450000   0.82430485
  0.55450000   0.82430589
  0.55450000   0.82430694
  0.55450000   0.82430798
  0.55450000   0.82430902
  0.55450000   0.82431006
  0.55450000   0.82431109
  0.55450000   0.82431213
  0.55450000   0.82431316
  0.55450000   0.82431419
  0.55450000   0.82431523
  0.55450000   0.82431625
  0.55450000   0.82431728
  0.55450000   0.82431831
  0.55450000   0.82431933
  0.55500000   0.82428683
  0.55500000   0.82428792
  0.55500000   0.82428900
  0.55500000   0.82429008
  0.55500000   0.82429116
  0.55500000   0.82429223
  0.55500000   0.82429331
  0.55500000   0.82429438
  0.55500000   0.82429545
  0.55500000   0.82429652
  0.55500000   0.82429759
  0.55500000   0.82429866
  0.55500000   0.82429972
  0.55500000   0.82430078
  0.55500000   0.82430184
  0.55500000   0.82430290
  0.55500000   0.82430396
  0.55500000   0.82430502
  0.55500000   0.82430607
  0.55500000   0.82430712
  0.55500000   0.82430817
  0.55500000   0.82430922
  0.55500000   0.82431027
  0.55500000   0.82431132
  0.55500000   0.82431236
  0.55500000   0.82431340
  0.55500000   0.82431444
  0.55500000   0.82431548
  0.55500000   0.82431652
  0.55500000   0.82431756
  0.55500000   0.82431859
  0.55500000   0.82431962
  0.55500000   0.82432066
  0.55500000   0.82432168
  0.55500000   0.82432271
  0.55500000   0.82432374
  0.55500000   0.82432476
  0.55500000   0.82432579
  0.55500000   0.82432681
  0.55500000   0.82432783
  0.55550000   0.82429545
  0.55550000   0.82429653
  0.55550000   0.82429761
  0.55550000   0.82429868
  0.55550000   0.82429976
  0.55550000   0.82430083
  0.55550000   0.82430190
  0.55550000   0.82430297
  0.55550000   0.82430404
  0.55550000   0.82430510
  0.55550000   0.82430616
  0.55550000   0.82430723
  0.55550000   0.82430829
  0.55550000   0.82430935
  0.55550000   0.82431040
  0.55550000   0.82431146
  0.55550000   0.82431251
  0.55550000   0.82431356
  0.55550000   0.82431461
  0.55550000   0.82431566
  0.55550000   0.82431671
  0.55550000   0.82431775
  0.55550000   0.82431880
  0.55550000   0.82431984
  0.55550000   0.82432088
  0.55550000   0.82432192
  0.55550000   0.82432296
  0.55550000   0.82432399
  0.55550000   0.82432503
  0.55550000   0.82432606
  0.55550000   0.82432709
  0.55550000   0.82432812
  0.55550000   0.82432914
  0.55550000   0.82433017
  0.55550000   0.82433119
  0.55550000   0.82433222
  0.55550000   0.82433324
  0.55550000   0.82433426
  0.55550000   0.82433527
  0.55550000   0.82433629
  0.55600000   0.82430403
  0.55600000   0.82430510
  0.55600000   0.82430618
  0.55600000   0.82430725
  0.55600000   0.82430832
  0.55600000   0.82430939
  0.55600000   0.82431045
  0.55600000   0.82431152
  0.55600000   0.82431258
  0.55600000   0.82431364
  0.55600000   0.82431470
  0.55600000   0.82431576
  0.55600000   0.82431682
  0.55600000   0.82431787
  0.55600000   0.82431893
  0.55600000   0.82431998
  0.55600000   0.82432103
  0.55600000   0.82432207
  0.55600000   0.82432312
  0.55600000   0.82432417
  0.55600000   0.82432521
  0.55600000   0.82432625
  0.55600000   0.82432729
  0.55600000   0.82432833
  0.55600000   0.82432936
  0.55600000   0.82433040
  0.55600000   0.82433143
  0.55600000   0.82433246
  0.55600000   0.82433349
  0.55600000   0.82433452
  0.55600000   0.82433555
  0.55600000   0.82433657
  0.55600000   0.82433760
  0.55600000   0.82433862
  0.55600000   0.82433964
  0.55600000   0.82434066
  0.55600000   0.82434167
  0.55600000   0.82434269
  0.55600000   0.82434370
  0.55600000   0.82434471
  0.55650000   0.82431257
  0.55650000   0.82431364
  0.55650000   0.82431471
  0.55650000   0.82431578
  0.55650000   0.82431684
  0.55650000   0.82431791
  0.55650000   0.82431897
  0.55650000   0.82432003
  0.55650000   0.82432109
  0.55650000   0.82432215
  0.55650000   0.82432320
  0.55650000   0.82432426
  0.55650000   0.82432531
  0.55650000   0.82432636
  0.55650000   0.82432741
  0.55650000   0.82432846
  0.55650000   0.82432950
  0.55650000   0.82433055
  0.55650000   0.82433159
  0.55650000   0.82433263
  0.55650000   0.82433367
  0.55650000   0.82433471
  0.55650000   0.82433574
  0.55650000   0.82433678
  0.55650000   0.82433781
  0.55650000   0.82433884
  0.55650000   0.82433987
  0.55650000   0.82434090
  0.55650000   0.82434192
  0.55650000   0.82434295
  0.55650000   0.82434397
  0.55650000   0.82434499
  0.55650000   0.82434601
  0.55650000   0.82434703
  0.55650000   0.82434805
  0.55650000   0.82434906
  0.55650000   0.82435007
  0.55650000   0.82435108
  0.55650000   0.82435209
  0.55650000   0.82435310
  0.55700000   0.82432107
  0.55700000   0.82432214
  0.55700000   0.82432321
  0.55700000   0.82432427
  0.55700000   0.82432533
  0.55700000   0.82432639
  0.55700000   0.82432745
  0.55700000   0.82432851
  0.55700000   0.82432956
  0.55700000   0.82433062
  0.55700000   0.82433167
  0.55700000   0.82433272
  0.55700000   0.82433377
  0.55700000   0.82433481
  0.55700000   0.82433586
  0.55700000   0.82433690
  0.55700000   0.82433794
  0.55700000   0.82433898
  0.55700000   0.82434002
  0.55700000   0.82434106
  0.55700000   0.82434209
  0.55700000   0.82434313
  0.55700000   0.82434416
  0.55700000   0.82434519
  0.55700000   0.82434622
  0.55700000   0.82434725
  0.55700000   0.82434827
  0.55700000   0.82434929
  0.55700000   0.82435032
  0.55700000   0.82435134
  0.55700000   0.82435236
  0.55700000   0.82435337
  0.55700000   0.82435439
  0.55700000   0.82435540
  0.55700000   0.82435642
  0.55700000   0.82435743
  0.55700000   0.82435844
  0.55700000   0.82435944
  0.55700000   0.82436045
  0.55700000   0.82436145
  0.55750000   0.82432954
  0.55750000   0.82433060
  0.55750000   0.82433167
  0.55750000   0.82433272
  0.55750000   0.82433378
  0.55750000   0.82433484
  0.55750000   0.82433589
  0.55750000   0.82433695
  0.55750000   0.82433800
  0.55750000   0.82433905
  0.55750000   0.82434010
  0.55750000   0.82434114
  0.55750000   0.82434219
  0.55750000   0.82434323
  0.55750000   0.82434427
  0.55750000   0.82434531
  0.55750000   0.82434635
  0.55750000   0.82434738
  0.55750000   0.82434842
  0.55750000   0.82434945
  0.55750000   0.82435048
  0.55750000   0.82435151
  0.55750000   0.82435254
  0.55750000   0.82435357
  0.55750000   0.82435459
  0.55750000   0.82435561
  0.55750000   0.82435664
  0.55750000   0.82435766
  0.55750000   0.82435867
  0.55750000   0.82435969
  0.55750000   0.82436071
  0.55750000   0.82436172
  0.55750000   0.82436273
  0.55750000   0.82436374
  0.55750000   0.82436475
  0.55750000   0.82436576
  0.55750000   0.82436676
  0.55750000   0.82436777
  0.55750000   0.82436877
  0.55750000   0.82436977
  0.55800000   0.82433797
  0.55800000   0.82433903
  0.55800000   0.82434009
  0.55800000   0.82434114
  0.55800000   0.82434220
  0.55800000   0.82434325
  0.55800000   0.82434430
  0.55800000   0.82434535
  0.55800000   0.82434640
  0.55800000   0.82434744
  0.55800000   0.82434849
  0.55800000   0.82434953
  0.55800000   0.82435057
  0.55800000   0.82435161
  0.55800000   0.82435265
  0.55800000   0.82435368
  0.55800000   0.82435472
  0.55800000   0.82435575
  0.55800000   0.82435678
  0.55800000   0.82435781
  0.55800000   0.82435883
  0.55800000   0.82435986
  0.55800000   0.82436088
  0.55800000   0.82436191
  0.55800000   0.82436293
  0.55800000   0.82436395
  0.55800000   0.82436496
  0.55800000   0.82436598
  0.55800000   0.82436700
  0.55800000   0.82436801
  0.55800000   0.82436902
  0.55800000   0.82437003
  0.55800000   0.82437104
  0.55800000   0.82437204
  0.55800000   0.82437305
  0.55800000   0.82437405
  0.55800000   0.82437505
  0.55800000   0.82437605
  0.55800000   0.82437705
  0.55800000   0.82437805
  0.55850000   0.82434636
  0.55850000   0.82434742
  0.55850000   0.82434847
  0.55850000   0.82434953
  0.55850000   0.82435058
  0.55850000   0.82435162
  0.55850000   0.82435267
  0.55850000   0.82435372
  0.55850000   0.82435476
  0.55850000   0.82435580
  0.55850000   0.82435684
  0.55850000   0.82435788
  0.55850000   0.82435892
  0.55850000   0.82435995
  0.55850000   0.82436098
  0.55850000   0.82436202
  0.55850000   0.82436305
  0.55850000   0.82436407
  0.55850000   0.82436510
  0.55850000   0.82436613
  0.55850000   0.82436715
  0.55850000   0.82436817
  0.55850000   0.82436919
  0.55850000   0.82437021
  0.55850000   0.82437123
  0.55850000   0.82437224
  0.55850000   0.82437326
  0.55850000   0.82437427
  0.55850000   0.82437528
  0.55850000   0.82437629
  0.55850000   0.82437730
  0.55850000   0.82437830
  0.55850000   0.82437931
  0.55850000   0.82438031
  0.55850000   0.82438131
  0.55850000   0.82438231
  0.55850000   0.82438331
  0.55850000   0.82438430
  0.55850000   0.82438530
  0.55850000   0.82438629
  0.55900000   0.82435472
  0.55900000   0.82435577
  0.55900000   0.82435682
  0.55900000   0.82435787
  0.55900000   0.82435892
  0.55900000   0.82435996
  0.55900000   0.82436100
  0.55900000   0.82436205
  0.55900000   0.82436309
  0.55900000   0.82436412
  0.55900000   0.82436516
  0.55900000   0.82436619
  0.55900000   0.82436723
  0.55900000   0.82436826
  0.55900000   0.82436929
  0.55900000   0.82437031
  0.55900000   0.82437134
  0.55900000   0.82437237
  0.55900000   0.82437339
  0.55900000   0.82437441
  0.55900000   0.82437543
  0.55900000   0.82437645
  0.55900000   0.82437746
  0.55900000   0.82437848
  0.55900000   0.82437949
  0.55900000   0.82438050
  0.55900000   0.82438151
  0.55900000   0.82438252
  0.55900000   0.82438353
  0.55900000   0.82438453
  0.55900000   0.82438554
  0.55900000   0.82438654
  0.55900000   0.82438754
  0.55900000   0.82438854
  0.55900000   0.82438954
  0.55900000   0.82439053
  0.55900000   0.82439153
  0.55900000   0.82439252
  0.55900000   0.82439351
  0.55900000   0.82439450
  0.55950000   0.82436304
  0.55950000   0.82436409
  0.55950000   0.82436514
  0.55950000   0.82436618
  0.55950000   0.82436722
  0.55950000   0.82436826
  0.55950000   0.82436930
  0.55950000   0.82437034
  0.55950000   0.82437138
  0.55950000   0.82437241
  0.55950000   0.82437344
  0.55950000   0.82437447
  0.55950000   0.82437550
  0.55950000   0.82437653
  0.55950000   0.82437755
  0.55950000   0.82437858
  0.55950000   0.82437960
  0.55950000   0.82438062
  0.55950000   0.82438164
  0.55950000   0.82438266
  0.55950000   0.82438367
  0.55950000   0.82438469
  0.55950000   0.82438570
  0.55950000   0.82438671
  0.55950000   0.82438772
  0.55950000   0.82438873
  0.55950000   0.82438973
  0.55950000   0.82439074
  0.55950000   0.82439174
  0.55950000   0.82439274
  0.55950000   0.82439374
  0.55950000   0.82439474
  0.55950000   0.82439574
  0.55950000   0.82439673
  0.55950000   0.82439773
  0.55950000   0.82439872
  0.55950000   0.82439971
  0.55950000   0.82440070
  0.55950000   0.82440168
  0.55950000   0.82440267
  0.56000000   0.82437133
  0.56000000   0.82437237
  0.56000000   0.82437341
  0.56000000   0.82437445
  0.56000000   0.82437549
  0.56000000   0.82437653
  0.56000000   0.82437756
  0.56000000   0.82437860
  0.56000000   0.82437963
  0.56000000   0.82438066
  0.56000000   0.82438169
  0.56000000   0.82438271
  0.56000000   0.82438374
  0.56000000   0.82438476
  0.56000000   0.82438578
  0.56000000   0.82438680
  0.56000000   0.82438782
  0.56000000   0.82438884
  0.56000000   0.82438985
  0.56000000   0.82439087
  0.56000000   0.82439188
  0.56000000   0.82439289
  0.56000000   0.82439390
  0.56000000   0.82439491
  0.56000000   0.82439591
  0.56000000   0.82439692
  0.56000000   0.82439792
  0.56000000   0.82439892
  0.56000000   0.82439992
  0.56000000   0.82440092
  0.56000000   0.82440191
  0.56000000   0.82440291
  0.56000000   0.82440390
  0.56000000   0.82440489
  0.56000000   0.82440588
  0.56000000   0.82440687
  0.56000000   0.82440786
  0.56000000   0.82440884
  0.56000000   0.82440982
  0.56000000   0.82441081
  0.56050000   0.82437958
  0.56050000   0.82438062
  0.56050000   0.82438166
  0.56050000   0.82438269
  0.56050000   0.82438373
  0.56050000   0.82438476
  0.56050000   0.82438579
  0.56050000   0.82438682
  0.56050000   0.82438785
  0.56050000   0.82438887
  0.56050000   0.82438990
  0.56050000   0.82439092
  0.56050000   0.82439194
  0.56050000   0.82439296
  0.56050000   0.82439398
  0.56050000   0.82439500
  0.56050000   0.82439601
  0.56050000   0.82439702
  0.56050000   0.82439803
  0.56050000   0.82439904
  0.56050000   0.82440005
  0.56050000   0.82440106
  0.56050000   0.82440206
  0.56050000   0.82440307
  0.56050000   0.82440407
  0.56050000   0.82440507
  0.56050000   0.82440607
  0.56050000   0.82440706
  0.56050000   0.82440806
  0.56050000   0.82440905
  0.56050000   0.82441005
  0.56050000   0.82441104
  0.56050000   0.82441203
  0.56050000   0.82441301
  0.56050000   0.82441400
  0.56050000   0.82441498
  0.56050000   0.82441597
  0.56050000   0.82441695
  0.56050000   0.82441793
  0.56050000   0.82441891
  0.56100000   0.82438779
  0.56100000   0.82438883
  0.56100000   0.82438986
  0.56100000   0.82439089
  0.56100000   0.82439192
  0.56100000   0.82439295
  0.56100000   0.82439398
  0.56100000   0.82439501
  0.56100000   0.82439603
  0.56100000   0.82439705
  0.56100000   0.82439807
  0.56100000   0.82439909
  0.56100000   0.82440011
  0.56100000   0.82440112
  0.56100000   0.82440214
  0.56100000   0.82440315
  0.56100000   0.82440416
  0.56100000   0.82440517
  0.56100000   0.82440618
  0.56100000   0.82440718
  0.56100000   0.82440819
  0.56100000   0.82440919
  0.56100000   0.82441019
  0.56100000   0.82441119
  0.56100000   0.82441219
  0.56100000   0.82441319
  0.56100000   0.82441418
  0.56100000   0.82441517
  0.56100000   0.82441617
  0.56100000   0.82441716
  0.56100000   0.82441814
  0.56100000   0.82441913
  0.56100000   0.82442012
  0.56100000   0.82442110
  0.56100000   0.82442208
  0.56100000   0.82442306
  0.56100000   0.82442404
  0.56100000   0.82442502
  0.56100000   0.82442600
  0.56100000   0.82442697
  0.56150000   0.82439597
  0.56150000   0.82439700
  0.56150000   0.82439803
  0.56150000   0.82439906
  0.56150000   0.82440009
  0.56150000   0.82440111
  0.56150000   0.82440213
  0.56150000   0.82440316
  0.56150000   0.82440418
  0.56150000   0.82440519
  0.56150000   0.82440621
  0.56150000   0.82440723
  0.56150000   0.82440824
  0.56150000   0.82440925
  0.56150000   0.82441026
  0.56150000   0.82441127
  0.56150000   0.82441228
  0.56150000   0.82441328
  0.56150000   0.82441429
  0.56150000   0.82441529
  0.56150000   0.82441629
  0.56150000   0.82441729
  0.56150000   0.82441829
  0.56150000   0.82441928
  0.56150000   0.82442028
  0.56150000   0.82442127
  0.56150000   0.82442226
  0.56150000   0.82442325
  0.56150000   0.82442424
  0.56150000   0.82442522
  0.56150000   0.82442621
  0.56150000   0.82442719
  0.56150000   0.82442817
  0.56150000   0.82442915
  0.56150000   0.82443013
  0.56150000   0.82443111
  0.56150000   0.82443208
  0.56150000   0.82443306
  0.56150000   0.82443403
  0.56150000   0.82443500
  0.56200000   0.82440411
  0.56200000   0.82440514
  0.56200000   0.82440617
  0.56200000   0.82440719
  0.56200000   0.82440821
  0.56200000   0.82440923
  0.56200000   0.82441025
  0.56200000   0.82441127
  0.56200000   0.82441229
  0.56200000   0.82441330
  0.56200000   0.82441432
  0.56200000   0.82441533
  0.56200000   0.82441634
  0.56200000   0.82441734
  0.56200000   0.82441835
  0.56200000   0.82441936
  0.56200000   0.82442036
  0.56200000   0.82442136
  0.56200000   0.82442236
  0.56200000   0.82442336
  0.56200000   0.82442436
  0.56200000   0.82442535
  0.56200000   0.82442634
  0.56200000   0.82442734
  0.56200000   0.82442833
  0.56200000   0.82442932
  0.56200000   0.82443030
  0.56200000   0.82443129
  0.56200000   0.82443227
  0.56200000   0.82443325
  0.56200000   0.82443424
  0.56200000   0.82443522
  0.56200000   0.82443619
  0.56200000   0.82443717
  0.56200000   0.82443814
  0.56200000   0.82443912
  0.56200000   0.82444009
  0.56200000   0.82444106
  0.56200000   0.82444203
  0.56200000   0.82444300
  0.56250000   0.82441222
  0.56250000   0.82441324
  0.56250000   0.82441427
  0.56250000   0.82441529
  0.56250000   0.82441630
  0.56250000   0.82441732
  0.56250000   0.82441834
  0.56250000   0.82441935
  0.56250000   0.82442036
  0.56250000   0.82442137
  0.56250000   0.82442238
  0.56250000   0.82442339
  0.56250000   0.82442440
  0.56250000   0.82442540
  0.56250000   0.82442640
  0.56250000   0.82442740
  0.56250000   0.82442840
  0.56250000   0.82442940
  0.56250000   0.82443040
  0.56250000   0.82443139
  0.56250000   0.82443239
  0.56250000   0.82443338
  0.56250000   0.82443437
  0.56250000   0.82443536
  0.56250000   0.82443634
  0.56250000   0.82443733
  0.56250000   0.82443831
  0.56250000   0.82443929
  0.56250000   0.82444027
  0.56250000   0.82444125
  0.56250000   0.82444223
  0.56250000   0.82444320
  0.56250000   0.82444418
  0.56250000   0.82444515
  0.56250000   0.82444612
  0.56250000   0.82444709
  0.56250000   0.82444806
  0.56250000   0.82444903
  0.56250000   0.82444999
  0.56250000   0.82445096
  0.56300000   0.82442029
  0.56300000   0.82442131
  0.56300000   0.82442233
  0.56300000   0.82442335
  0.56300000   0.82442436
  0.56300000   0.82442537
  0.56300000   0.82442639
  0.56300000   0.82442740
  0.56300000   0.82442841
  0.56300000   0.82442941
  0.56300000   0.82443042
  0.56300000   0.82443142
  0.56300000   0.82443242
  0.56300000   0.82443342
  0.56300000   0.82443442
  0.56300000   0.82443542
  0.56300000   0.82443641
  0.56300000   0.82443741
  0.56300000   0.82443840
  0.56300000   0.82443939
  0.56300000   0.82444038
  0.56300000   0.82444137
  0.56300000   0.82444236
  0.56300000   0.82444334
  0.56300000   0.82444432
  0.56300000   0.82444530
  0.56300000   0.82444628
  0.56300000   0.82444726
  0.56300000   0.82444824
  0.56300000   0.82444921
  0.56300000   0.82445019
  0.56300000   0.82445116
  0.56300000   0.82445213
  0.56300000   0.82445310
  0.56300000   0.82445407
  0.56300000   0.82445503
  0.56300000   0.82445600
  0.56300000   0.82445696
  0.56300000   0.82445792
  0.56300000   0.82445888
  0.56350000   0.82442833
  0.56350000   0.82442934
  0.56350000   0.82443036
  0.56350000   0.82443137
  0.56350000   0.82443238
  0.56350000   0.82443339
  0.56350000   0.82443440
  0.56350000   0.82443541
  0.56350000   0.82443641
  0.56350000   0.82443741
  0.56350000   0.82443842
  0.56350000   0.82443942
  0.56350000   0.82444041
  0.56350000   0.82444141
  0.56350000   0.82444241
  0.56350000   0.82444340
  0.56350000   0.82444439
  0.56350000   0.82444538
  0.56350000   0.82444637
  0.56350000   0.82444736
  0.56350000   0.82444834
  0.56350000   0.82444933
  0.56350000   0.82445031
  0.56350000   0.82445129
  0.56350000   0.82445227
  0.56350000   0.82445325
  0.56350000   0.82445422
  0.56350000   0.82445520
  0.56350000   0.82445617
  0.56350000   0.82445714
  0.56350000   0.82445811
  0.56350000   0.82445908
  0.56350000   0.82446005
  0.56350000   0.82446101
  0.56350000   0.82446198
  0.56350000   0.82446294
  0.56350000   0.82446390
  0.56350000   0.82446486
  0.56350000   0.82446582
  0.56350000   0.82446677
  0.56400000   0.82443633
  0.56400000   0.82443734
  0.56400000   0.82443835
  0.56400000   0.82443936
  0.56400000   0.82444037
  0.56400000   0.82444138
  0.56400000   0.82444238
  0.56400000   0.82444338
  0.56400000   0.82444438
  0.56400000   0.82444538
  0.56400000   0.82444638
  0.56400000   0.82444738
  0.56400000   0.82444837
  0.56400000   0.82444936
  0.56400000   0.82445035
  0.56400000   0.82445134
  0.56400000   0.82445233
  0.56400000   0.82445332
  0.56400000   0.82445430
  0.56400000   0.82445529
  0.56400000   0.82445627
  0.56400000   0.82445725
  0.56400000   0.82445823
  0.56400000   0.82445920
  0.56400000   0.82446018
  0.56400000   0.82446115
  0.56400000   0.82446213
  0.56400000   0.82446310
  0.56400000   0.82446407
  0.56400000   0.82446503
  0.56400000   0.82446600
  0.56400000   0.82446697
  0.56400000   0.82446793
  0.56400000   0.82446889
  0.56400000   0.82446985
  0.56400000   0.82447081
  0.56400000   0.82447177
  0.56400000   0.82447272
  0.56400000   0.82447368
  0.56400000   0.82447463
  0.56450000   0.82444430
  0.56450000   0.82444531
  0.56450000   0.82444631
  0.56450000   0.82444732
  0.56450000   0.82444832
  0.56450000   0.82444932
  0.56450000   0.82445032
  0.56450000   0.82445132
  0.56450000   0.82445232
  0.56450000   0.82445331
  0.56450000   0.82445431
  0.56450000   0.82445530
  0.56450000   0.82445629
  0.56450000   0.82445728
  0.56450000   0.82445827
  0.56450000   0.82445925
  0.56450000   0.82446024
  0.56450000   0.82446122
  0.56450000   0.82446220
  0.56450000   0.82446318
  0.56450000   0.82446416
  0.56450000   0.82446514
  0.56450000   0.82446611
  0.56450000   0.82446708
  0.56450000   0.82446806
  0.56450000   0.82446903
  0.56450000   0.82447000
  0.56450000   0.82447096
  0.56450000   0.82447193
  0.56450000   0.82447289
  0.56450000   0.82447386
  0.56450000   0.82447482
  0.56450000   0.82447578
  0.56450000   0.82447673
  0.56450000   0.82447769
  0.56450000   0.82447865
  0.56450000   0.82447960
  0.56450000   0.82448055
  0.56450000   0.82448150
  0.56450000   0.82448245
  0.56500000   0.82445223
  0.56500000   0.82445323
  0.56500000   0.82445424
  0.56500000   0.82445524
  0.56500000   0.82445624
  0.56500000   0.82445724
  0.56500000   0.82445823
  0.56500000   0.82445923
  0.56500000   0.82446022
  0.56500000   0.82446121
  0.56500000   0.82446220
  0.56500000   0.82446319
  0.56500000   0.82446418
  0.56500000   0.82446516
  0.56500000   0.82446615
  0.56500000   0.82446713
  0.56500000   0.82446811
  0.56500000   0.82446909
  0.56500000   0.82447007
  0.56500000   0.82447104
  0.56500000   0.82447202
  0.56500000   0.82447299
  0.56500000   0.82447396
  0.56500000   0.82447493
  0.56500000   0.82447590
  0.56500000   0.82447687
  0.56500000   0.82447783
  0.56500000   0.82447879
  0.56500000   0.82447976
  0.56500000   0.82448072
  0.56500000   0.82448168
  0.56500000   0.82448263
  0.56500000   0.82448359
  0.56500000   0.82448454
  0.56500000   0.82448550
  0.56500000   0.82448645
  0.56500000   0.82448740
  0.56500000   0.82448835
  0.56500000   0.82448929
  0.56500000   0.82449024
  0.56550000   0.82446013
  0.56550000   0.82446113
  0.56550000   0.82446213
  0.56550000   0.82446313
  0.56550000   0.82446412
  0.56550000   0.82446512
  0.56550000   0.82446611
  0.56550000   0.82446710
  0.56550000   0.82446809
  0.56550000   0.82446908
  0.56550000   0.82447006
  0.56550000   0.82447105
  0.56550000   0.82447203
  0.56550000   0.82447301
  0.56550000   0.82447399
  0.56550000   0.82447497
  0.56550000   0.82447595
  0.56550000   0.82447692
  0.56550000   0.82447790
  0.56550000   0.82447887
  0.56550000   0.82447984
  0.56550000   0.82448081
  0.56550000   0.82448178
  0.56550000   0.82448274
  0.56550000   0.82448371
  0.56550000   0.82448467
  0.56550000   0.82448563
  0.56550000   0.82448659
  0.56550000   0.82448755
  0.56550000   0.82448851
  0.56550000   0.82448946
  0.56550000   0.82449042
  0.56550000   0.82449137
  0.56550000   0.82449232
  0.56550000   0.82449327
  0.56550000   0.82449422
  0.56550000   0.82449516
  0.56550000   0.82449611
  0.56550000   0.82449705
  0.56550000   0.82449799
  0.56600000   0.82446799
  0.56600000   0.82446899
  0.56600000   0.82446998
  0.56600000   0.82447098
  0.56600000   0.82447197
  0.56600000   0.82447296
  0.56600000   0.82447395
  0.56600000   0.82447494
  0.56600000   0.82447592
  0.56600000   0.82447691
  0.56600000   0.82447789
  0.56600000   0.82447887
  0.56600000   0.82447985
  0.56600000   0.82448083
  0.56600000   0.82448180
  0.56600000   0.82448278
  0.56600000   0.82448375
  0.56600000   0.82448472
  0.56600000   0.82448569
  0.56600000   0.82448666
  0.56600000   0.82448763
  0.56600000   0.82448860
  0.56600000   0.82448956
  0.56600000   0.82449052
  0.56600000   0.82449148
  0.56600000   0.82449244
  0.56600000   0.82449340
  0.56600000   0.82449436
  0.56600000   0.82449531
  0.56600000   0.82449626
  0.56600000   0.82449721
  0.56600000   0.82449817
  0.56600000   0.82449911
  0.56600000   0.82450006
  0.56600000   0.82450101
  0.56600000   0.82450195
  0.56600000   0.82450289
  0.56600000   0.82450383
  0.56600000   0.82450477
  0.56600000   0.82450571
  0.56650000   0.82447582
  0.56650000   0.82447681
  0.56650000   0.82447781
  0.56650000   0.82447880
  0.56650000   0.82447979
  0.56650000   0.82448077
  0.56650000   0.82448176
  0.56650000   0.82448274
  0.56650000   0.82448372
  0.56650000   0.82448470
  0.56650000   0.82448568
  0.56650000   0.82448666
  0.56650000   0.82448764
  0.56650000   0.82448861
  0.56650000   0.82448958
  0.56650000   0.82449055
  0.56650000   0.82449152
  0.56650000   0.82449249
  0.56650000   0.82449346
  0.56650000   0.82449442
  0.56650000   0.82449538
  0.56650000   0.82449635
  0.56650000   0.82449731
  0.56650000   0.82449827
  0.56650000   0.82449922
  0.56650000   0.82450018
  0.56650000   0.82450113
  0.56650000   0.82450208
  0.56650000   0.82450304
  0.56650000   0.82450399
  0.56650000   0.82450493
  0.56650000   0.82450588
  0.56650000   0.82450683
  0.56650000   0.82450777
  0.56650000   0.82450871
  0.56650000   0.82450965
  0.56650000   0.82451059
  0.56650000   0.82451153
  0.56650000   0.82451246
  0.56650000   0.82451340
  0.56700000   0.82448362
  0.56700000   0.82448461
  0.56700000   0.82448559
  0.56700000   0.82448658
  0.56700000   0.82448757
  0.56700000   0.82448855
  0.56700000   0.82448953
  0.56700000   0.82449051
  0.56700000   0.82449149
  0.56700000   0.82449247
  0.56700000   0.82449344
  0.56700000   0.82449441
  0.56700000   0.82449539
  0.56700000   0.82449636
  0.56700000   0.82449733
  0.56700000   0.82449829
  0.56700000   0.82449926
  0.56700000   0.82450022
  0.56700000   0.82450119
  0.56700000   0.82450215
  0.56700000   0.82450311
  0.56700000   0.82450406
  0.56700000   0.82450502
  0.56700000   0.82450598
  0.56700000   0.82450693
  0.56700000   0.82450788
  0.56700000   0.82450883
  0.56700000   0.82450978
  0.56700000   0.82451073
  0.56700000   0.82451167
  0.56700000   0.82451262
  0.56700000   0.82451356
  0.56700000   0.82451450
  0.56700000   0.82451544
  0.56700000   0.82451638
  0.56700000   0.82451732
  0.56700000   0.82451825
  0.56700000   0.82451919
  0.56700000   0.82452012
  0.56700000   0.82452105
  0.56750000   0.82449138
  0.56750000   0.82449236
  0.56750000   0.82449335
  0.56750000   0.82449433
  0.56750000   0.82449531
  0.56750000   0.82449629
  0.56750000   0.82449727
  0.56750000   0.82449825
  0.56750000   0.82449922
  0.56750000   0.82450019
  0.56750000   0.82450117
  0.56750000   0.82450214
  0.56750000   0.82450310
  0.56750000   0.82450407
  0.56750000   0.82450504
  0.56750000   0.82450600
  0.56750000   0.82450696
  0.56750000   0.82450792
  0.56750000   0.82450888
  0.56750000   0.82450984
  0.56750000   0.82451079
  0.56750000   0.82451175
  0.56750000   0.82451270
  0.56750000   0.82451365
  0.56750000   0.82451460
  0.56750000   0.82451555
  0.56750000   0.82451650
  0.56750000   0.82451744
  0.56750000   0.82451839
  0.56750000   0.82451933
  0.56750000   0.82452027
  0.56750000   0.82452121
  0.56750000   0.82452215
  0.56750000   0.82452308
  0.56750000   0.82452402
  0.56750000   0.82452495
  0.56750000   0.82452588
  0.56750000   0.82452681
  0.56750000   0.82452774
  0.56750000   0.82452867
  0.56800000   0.82449911
  0.56800000   0.82450009
  0.56800000   0.82450107
  0.56800000   0.82450205
  0.56800000   0.82450303
  0.56800000   0.82450400
  0.56800000   0.82450498
  0.56800000   0.82450595
  0.56800000   0.82450692
  0.56800000   0.82450789
  0.56800000   0.82450886
  0.56800000   0.82450982
  0.56800000   0.82451079
  0.56800000   0.82451175
  0.56800000   0.82451271
  0.56800000   0.82451367
  0.56800000   0.82451463
  0.56800000   0.82451559
  0.56800000   0.82451654
  0.56800000   0.82451750
  0.56800000   0.82451845
  0.56800000   0.82451940
  0.56800000   0.82452035
  0.56800000   0.82452130
  0.56800000   0.82452224
  0.56800000   0.82452319
  0.56800000   0.82452413
  0.56800000   0.82452507
  0.56800000   0.82452601
  0.56800000   0.82452695
  0.56800000   0.82452789
  0.56800000   0.82452882
  0.56800000   0.82452976
  0.56800000   0.82453069
  0.56800000   0.82453162
  0.56800000   0.82453255
  0.56800000   0.82453348
  0.56800000   0.82453441
  0.56800000   0.82453533
  0.56800000   0.82453626
  0.56850000   0.82450680
  0.56850000   0.82450778
  0.56850000   0.82450876
  0.56850000   0.82450973
  0.56850000   0.82451071
  0.56850000   0.82451168
  0.56850000   0.82451265
  0.56850000   0.82451362
  0.56850000   0.82451458
  0.56850000   0.82451555
  0.56850000   0.82451651
  0.56850000   0.82451748
  0.56850000   0.82451844
  0.56850000   0.82451940
  0.56850000   0.82452035
  0.56850000   0.82452131
  0.56850000   0.82452227
  0.56850000   0.82452322
  0.56850000   0.82452417
  0.56850000   0.82452512
  0.56850000   0.82452607
  0.56850000   0.82452702
  0.56850000   0.82452796
  0.56850000   0.82452891
  0.56850000   0.82452985
  0.56850000   0.82453079
  0.56850000   0.82453173
  0.56850000   0.82453267
  0.56850000   0.82453360
  0.56850000   0.82453454
  0.56850000   0.82453547
  0.56850000   0.82453641
  0.56850000   0.82453734
  0.56850000   0.82453827
  0.56850000   0.82453919
  0.56850000   0.82454012
  0.56850000   0.82454104
  0.56850000   0.82454197
  0.56850000   0.82454289
  0.56850000   0.82454381
  0.56900000   0.82451446
  0.56900000   0.82451544
  0.56900000   0.82451641
  0.56900000   0.82451738
  0.56900000   0.82451835
  0.56900000   0.82451932
  0.56900000   0.82452029
  0.56900000   0.82452125
  0.56900000   0.82452222
  0.56900000   0.82452318
  0.56900000   0.82452414
  0.56900000   0.82452510
  0.56900000   0.82452605
  0.56900000   0.82452701
  0.56900000   0.82452796
  0.56900000   0.82452892
  0.56900000   0.82452987
  0.56900000   0.82453082
  0.56900000   0.82453177
  0.56900000   0.82453271
  0.56900000   0.82453366
  0.56900000   0.82453460
  0.56900000   0.82453554
  0.56900000   0.82453648
  0.56900000   0.82453742
  0.56900000   0.82453836
  0.56900000   0.82453930
  0.56900000   0.82454023
  0.56900000   0.82454116
  0.56900000   0.82454210
  0.56900000   0.82454303
  0.56900000   0.82454395
  0.56900000   0.82454488
  0.56900000   0.82454581
  0.56900000   0.82454673
  0.56900000   0.82454765
  0.56900000   0.82454858
  0.56900000   0.82454950
  0.56900000   0.82455041
  0.56900000   0.82455133
  0.56950000   0.82452209
  0.56950000   0.82452306
  0.56950000   0.82452403
  0.56950000   0.82452500
  0.56950000   0.82452596
  0.56950000   0.82452693
  0.56950000   0.82452789
  0.56950000   0.82452885
  0.56950000   0.82452981
  0.56950000   0.82453077
  0.56950000   0.82453173
  0.56950000   0.82453268
  0.56950000   0.82453364
  0.56950000   0.82453459
  0.56950000   0.82453554
  0.56950000   0.82453649
  0.56950000   0.82453744
  0.56950000   0.82453838
  0.56950000   0.82453933
  0.56950000   0.82454027
  0.56950000   0.82454121
  0.56950000   0.82454215
  0.56950000   0.82454309
  0.56950000   0.82454403
  0.56950000   0.82454496
  0.56950000   0.82454590
  0.56950000   0.82454683
  0.56950000   0.82454776
  0.56950000   0.82454869
  0.56950000   0.82454962
  0.56950000   0.82455054
  0.56950000   0.82455147
  0.56950000   0.82455239
  0.56950000   0.82455332
  0.56950000   0.82455424
  0.56950000   0.82455516
  0.56950000   0.82455607
  0.56950000   0.82455699
  0.56950000   0.82455790
  0.56950000   0.82455882
  0.57000000   0.82452969
  0.57000000   0.82453065
  0.57000000   0.82453162
  0.57000000   0.82453258
  0.57000000   0.82453354
  0.57000000   0.82453451
  0.57000000   0.82453546
  0.57000000   0.82453642
  0.57000000   0.82453738
  0.57000000   0.82453833
  0.57000000   0.82453929
  0.57000000   0.82454024
  0.57000000   0.82454119
  0.57000000   0.82454214
  0.57000000   0.82454308
  0.57000000   0.82454403
  0.57000000   0.82454497
  0.57000000   0.82454592
  0.57000000   0.82454686
  0.57000000   0.82454780
  0.57000000   0.82454873
  0.57000000   0.82454967
  0.57000000   0.82455061
  0.57000000   0.82455154
  0.57000000   0.82455247
  0.57000000   0.82455340
  0.57000000   0.82455433
  0.57000000   0.82455526
  0.57000000   0.82455618
  0.57000000   0.82455711
  0.57000000   0.82455803
  0.57000000   0.82455895
  0.57000000   0.82455987
  0.57000000   0.82456079
  0.57000000   0.82456171
  0.57000000   0.82456262
  0.57000000   0.82456354
  0.57000000   0.82456445
  0.57000000   0.82456536
  0.57000000   0.82456627
  0.57050000   0.82453725
  0.57050000   0.82453821
  0.57050000   0.82453917
  0.57050000   0.82454013
  0.57050000   0.82454109
  0.57050000   0.82454205
  0.57050000   0.82454300
  0.57050000   0.82454396
  0.57050000   0.82454491
  0.57050000   0.82454586
  0.57050000   0.82454681
  0.57050000   0.82454776
  0.57050000   0.82454871
  0.57050000   0.82454965
  0.57050000   0.82455059
  0.57050000   0.82455154
  0.57050000   0.82455248
  0.57050000   0.82455342
  0.57050000   0.82455435
  0.57050000   0.82455529
  0.57050000   0.82455622
  0.57050000   0.82455716
  0.57050000   0.82455809
  0.57050000   0.82455902
  0.57050000   0.82455995
  0.57050000   0.82456087
  0.57050000   0.82456180
  0.57050000   0.82456272
  0.57050000   0.82456364
  0.57050000   0.82456456
  0.57050000   0.82456548
  0.57050000   0.82456640
  0.57050000   0.82456732
  0.57050000   0.82456823
  0.57050000   0.82456915
  0.57050000   0.82457006
  0.57050000   0.82457097
  0.57050000   0.82457188
  0.57050000   0.82457279
  0.57050000   0.82457370
  0.57100000   0.82454478
  0.57100000   0.82454574
  0.57100000   0.82454669
  0.57100000   0.82454765
  0.57100000   0.82454861
  0.57100000   0.82454956
  0.57100000   0.82455051
  0.57100000   0.82455146
  0.57100000   0.82455241
  0.57100000   0.82455336
  0.57100000   0.82455430
  0.57100000   0.82455525
  0.57100000   0.82455619
  0.57100000   0.82455713
  0.57100000   0.82455807
  0.57100000   0.82455901
  0.57100000   0.82455995
  0.57100000   0.82456088
  0.57100000   0.82456182
  0.57100000   0.82456275
  0.57100000   0.82456368
  0.57100000   0.82456461
  0.57100000   0.82456554
  0.57100000   0.82456646
  0.57100000   0.82456739
  0.57100000   0.82456831
  0.57100000   0.82456923
  0.57100000   0.82457015
  0.57100000   0.82457107
  0.57100000   0.82457199
  0.57100000   0.82457291
  0.57100000   0.82457382
  0.57100000   0.82457473
  0.57100000   0.82457564
  0.57100000   0.82457656
  0.57100000   0.82457746
  0.57100000   0.82457837
  0.57100000   0.82457928
  0.57100000   0.82458018
  0.57100000   0.82458108
  0.57150000   0.82455227
  0.57150000   0.82455323
  0.57150000   0.82455418
  0.57150000   0.82455514
  0.57150000   0.82455609
  0.57150000   0.82455704
  0.57150000   0.82455799
  0.57150000   0.82455893
  0.57150000   0.82455988
  0.57150000   0.82456082
  0.57150000   0.82456176
  0.57150000   0.82456270
  0.57150000   0.82456364
  0.57150000   0.82456458
  0.57150000   0.82456552
  0.57150000   0.82456645
  0.57150000   0.82456739
  0.57150000   0.82456832
  0.57150000   0.82456925
  0.57150000   0.82457018
  0.57150000   0.82457110
  0.57150000   0.82457203
  0.57150000   0.82457295
  0.57150000   0.82457388
  0.57150000   0.82457480
  0.57150000   0.82457572
  0.57150000   0.82457664
  0.57150000   0.82457755
  0.57150000   0.82457847
  0.57150000   0.82457938
  0.57150000   0.82458029
  0.57150000   0.82458121
  0.57150000   0.82458211
  0.57150000   0.82458302
  0.57150000   0.82458393
  0.57150000   0.82458484
  0.57150000   0.82458574
  0.57150000   0.82458664
  0.57150000   0.82458754
  0.57150000   0.82458844
  0.57200000   0.82455973
  0.57200000   0.82456069
  0.57200000   0.82456164
  0.57200000   0.82456259
  0.57200000   0.82456354
  0.57200000   0.82456448
  0.57200000   0.82456543
  0.57200000   0.82456637
  0.57200000   0.82456731
  0.57200000   0.82456825
  0.57200000   0.82456919
  0.57200000   0.82457013
  0.57200000   0.82457106
  0.57200000   0.82457200
  0.57200000   0.82457293
  0.57200000   0.82457386
  0.57200000   0.82457479
  0.57200000   0.82457572
  0.57200000   0.82457665
  0.57200000   0.82457757
  0.57200000   0.82457849
  0.57200000   0.82457942
  0.57200000   0.82458034
  0.57200000   0.82458126
  0.57200000   0.82458217
  0.57200000   0.82458309
  0.57200000   0.82458401
  0.57200000   0.82458492
  0.57200000   0.82458583
  0.57200000   0.82458674
  0.57200000   0.82458765
  0.57200000   0.82458856
  0.57200000   0.82458946
  0.57200000   0.82459037
  0.57200000   0.82459127
  0.57200000   0.82459217
  0.57200000   0.82459307
  0.57200000   0.82459397
  0.57200000   0.82459487
  0.57200000   0.82459577
  0.57250000   0.82456717
  0.57250000   0.82456811
  0.57250000   0.82456906
  0.57250000   0.82457001
  0.57250000   0.82457095
  0.57250000   0.82457189
  0.57250000   0.82457284
  0.57250000   0.82457378
  0.57250000   0.82457471
  0.57250000   0.82457565
  0.57250000   0.82457659
  0.57250000   0.82457752
  0.57250000   0.82457845
  0.57250000   0.82457938
  0.57250000   0.82458031
  0.57250000   0.82458124
  0.57250000   0.82458216
  0.57250000   0.82458309
  0.57250000   0.82458401
  0.57250000   0.82458493
  0.57250000   0.82458585
  0.57250000   0.82458677
  0.57250000   0.82458769
  0.57250000   0.82458861
  0.57250000   0.82458952
  0.57250000   0.82459043
  0.57250000   0.82459134
  0.57250000   0.82459225
  0.57250000   0.82459316
  0.57250000   0.82459407
  0.57250000   0.82459497
  0.57250000   0.82459588
  0.57250000   0.82459678
  0.57250000   0.82459768
  0.57250000   0.82459858
  0.57250000   0.82459948
  0.57250000   0.82460038
  0.57250000   0.82460127
  0.57250000   0.82460217
  0.57250000   0.82460306
  0.57300000   0.82457456
  0.57300000   0.82457551
  0.57300000   0.82457645
  0.57300000   0.82457740
  0.57300000   0.82457834
  0.57300000   0.82457928
  0.57300000   0.82458021
  0.57300000   0.82458115
  0.57300000   0.82458208
  0.57300000   0.82458302
  0.57300000   0.82458395
  0.57300000   0.82458488
  0.57300000   0.82458581
  0.57300000   0.82458673
  0.57300000   0.82458766
  0.57300000   0.82458858
  0.57300000   0.82458951
  0.57300000   0.82459043
  0.57300000   0.82459135
  0.57300000   0.82459226
  0.57300000   0.82459318
  0.57300000   0.82459410
  0.57300000   0.82459501
  0.57300000   0.82459592
  0.57300000   0.82459683
  0.57300000   0.82459774
  0.57300000   0.82459865
  0.57300000   0.82459956
  0.57300000   0.82460046
  0.57300000   0.82460137
  0.57300000   0.82460227
  0.57300000   0.82460317
  0.57300000   0.82460407
  0.57300000   0.82460496
  0.57300000   0.82460586
  0.57300000   0.82460676
  0.57300000   0.82460765
  0.57300000   0.82460854
  0.57300000   0.82460943
  0.57300000   0.82461032
  0.57350000   0.82458193
  0.57350000   0.82458287
  0.57350000   0.82458381
  0.57350000   0.82458475
  0.57350000   0.82458569
  0.57350000   0.82458662
  0.57350000   0.82458756
  0.57350000   0.82458849
  0.57350000   0.82458942
  0.57350000   0.82459035
  0.57350000   0.82459128
  0.57350000   0.82459221
  0.57350000   0.82459313
  0.57350000   0.82459405
  0.57350000   0.82459498
  0.57350000   0.82459590
  0.57350000   0.82459682
  0.57350000   0.82459773
  0.57350000   0.82459865
  0.57350000   0.82459956
  0.57350000   0.82460048
  0.57350000   0.82460139
  0.57350000   0.82460230
  0.57350000   0.82460321
  0.57350000   0.82460411
  0.57350000   0.82460502
  0.57350000   0.82460592
  0.57350000   0.82460683
  0.57350000   0.82460773
  0.57350000   0.82460863
  0.57350000   0.82460953
  0.57350000   0.82461042
  0.57350000   0.82461132
  0.57350000   0.82461222
  0.57350000   0.82461311
  0.57350000   0.82461400
  0.57350000   0.82461489
  0.57350000   0.82461578
  0.57350000   0.82461667
  0.57350000   0.82461755
  0.57400000   0.82458926
  0.57400000   0.82459020
  0.57400000   0.82459114
  0.57400000   0.82459207
  0.57400000   0.82459301
  0.57400000   0.82459394
  0.57400000   0.82459487
  0.57400000   0.82459580
  0.57400000   0.82459673
  0.57400000   0.82459765
  0.57400000   0.82459858
  0.57400000   0.82459950
  0.57400000   0.82460042
  0.57400000   0.82460134
  0.57400000   0.82460226
  0.57400000   0.82460318
  0.57400000   0.82460409
  0.57400000   0.82460501
  0.57400000   0.82460592
  0.57400000   0.82460683
  0.57400000   0.82460774
  0.57400000   0.82460865
  0.57400000   0.82460955
  0.57400000   0.82461046
  0.57400000   0.82461136
  0.57400000   0.82461227
  0.57400000   0.82461317
  0.57400000   0.82461407
  0.57400000   0.82461496
  0.57400000   0.82461586
  0.57400000   0.82461676
  0.57400000   0.82461765
  0.57400000   0.82461854
  0.57400000   0.82461943
  0.57400000   0.82462032
  0.57400000   0.82462121
  0.57400000   0.82462210
  0.57400000   0.82462298
  0.57400000   0.82462387
  0.57400000   0.82462475
  0.57450000   0.82459657
  0.57450000   0.82459750
  0.57450000   0.82459843
  0.57450000   0.82459937
  0.57450000   0.82460030
  0.57450000   0.82460122
  0.57450000   0.82460215
  0.57450000   0.82460308
  0.57450000   0.82460400
  0.57450000   0.82460492
  0.57450000   0.82460584
  0.57450000   0.82460676
  0.57450000   0.82460768
  0.57450000   0.82460860
  0.57450000   0.82460951
  0.57450000   0.82461043
  0.57450000   0.82461134
  0.57450000   0.82461225
  0.57450000   0.82461316
  0.57450000   0.82461407
  0.57450000   0.82461497
  0.57450000   0.82461588
  0.57450000   0.82461678
  0.57450000   0.82461768
  0.57450000   0.82461858
  0.57450000   0.82461948
  0.57450000   0.82462038
  0.57450000   0.82462127
  0.57450000   0.82462217
  0.57450000   0.82462306
  0.57450000   0.82462395
  0.57450000   0.82462484
  0.57450000   0.82462573
  0.57450000   0.82462662
  0.57450000   0.82462751
  0.57450000   0.82462839
  0.57450000   0.82462927
  0.57450000   0.82463016
  0.57450000   0.82463104
  0.57450000   0.82463192
  0.57500000   0.82460384
  0.57500000   0.82460477
  0.57500000   0.82460570
  0.57500000   0.82460663
  0.57500000   0.82460755
  0.57500000   0.82460848
  0.57500000   0.82460940
  0.57500000   0.82461032
  0.57500000   0.82461124
  0.57500000   0.82461216
  0.57500000   0.82461308
  0.57500000   0.82461400
  0.57500000   0.82461491
  0.57500000   0.82461582
  0.57500000   0.82461673
  0.57500000   0.82461764
  0.57500000   0.82461855
  0.57500000   0.82461946
  0.57500000   0.82462037
  0.57500000   0.82462127
  0.57500000   0.82462217
  0.57500000   0.82462307
  0.57500000   0.82462397
  0.57500000   0.82462487
  0.57500000   0.82462577
  0.57500000   0.82462666
  0.57500000   0.82462756
  0.57500000   0.82462845
  0.57500000   0.82462934
  0.57500000   0.82463023
  0.57500000   0.82463112
  0.57500000   0.82463201
  0.57500000   0.82463289
  0.57500000   0.82463378
  0.57500000   0.82463466
  0.57500000   0.82463554
  0.57500000   0.82463642
  0.57500000   0.82463730
  0.57500000   0.82463818
  0.57500000   0.82463905
  0.57550000   0.82461108
  0.57550000   0.82461200
  0.57550000   0.82461293
  0.57550000   0.82461385
  0.57550000   0.82461478
  0.57550000   0.82461570
  0.57550000   0.82461662
  0.57550000   0.82461754
  0.57550000   0.82461845
  0.57550000   0.82461937
  0.57550000   0.82462028
  0.57550000   0.82462120
  0.57550000   0.82462211
  0.57550000   0.82462302
  0.57550000   0.82462392
  0.57550000   0.82462483
  0.57550000   0.82462574
  0.57550000   0.82462664
  0.57550000   0.82462754
  0.57550000   0.82462844
  0.57550000   0.82462934
  0.57550000   0.82463024
  0.57550000   0.82463113
  0.57550000   0.82463203
  0.57550000   0.82463292
  0.57550000   0.82463382
  0.57550000   0.82463471
  0.57550000   0.82463559
  0.57550000   0.82463648
  0.57550000   0.82463737
  0.57550000   0.82463825
  0.57550000   0.82463914
  0.57550000   0.82464002
  0.57550000   0.82464090
  0.57550000   0.82464178
  0.57550000   0.82464266
  0.57550000   0.82464353
  0.57550000   0.82464441
  0.57550000   0.82464528
  0.57550000   0.82464616
  0.57600000   0.82461828
  0.57600000   0.82461921
  0.57600000   0.82462013
  0.57600000   0.82462105
  0.57600000   0.82462197
  0.57600000   0.82462289
  0.57600000   0.82462380
  0.57600000   0.82462472
  0.57600000   0.82462563
  0.57600000   0.82462654
  0.57600000   0.82462746
  0.57600000   0.82462836
  0.57600000   0.82462927
  0.57600000   0.82463018
  0.57600000   0.82463108
  0.57600000   0.82463198
  0.57600000   0.82463289
  0.57600000   0.82463379
  0.57600000   0.82463469
  0.57600000   0.82463558
  0.57600000   0.82463648
  0.57600000   0.82463737
  0.57600000   0.82463827
  0.57600000   0.82463916
  0.57600000   0.82464005
  0.57600000   0.82464094
  0.57600000   0.82464182
  0.57600000   0.82464271
  0.57600000   0.82464359
  0.57600000   0.82464448
  0.57600000   0.82464536
  0.57600000   0.82464624
  0.57600000   0.82464712
  0.57600000   0.82464799
  0.57600000   0.82464887
  0.57600000   0.82464974
  0.57600000   0.82465062
  0.57600000   0.82465149
  0.57600000   0.82465236
  0.57600000   0.82465323
  0.57650000   0.82462546
  0.57650000   0.82462638
  0.57650000   0.82462730
  0.57650000   0.82462822
  0.57650000   0.82462913
  0.57650000   0.82463005
  0.57650000   0.82463096
  0.57650000   0.82463187
  0.57650000   0.82463278
  0.57650000   0.82463369
  0.57650000   0.82463460
  0.57650000   0.82463550
  0.57650000   0.82463641
  0.57650000   0.82463731
  0.57650000   0.82463821
  0.57650000   0.82463911
  0.57650000   0.82464001
  0.57650000   0.82464090
  0.57650000   0.82464180
  0.57650000   0.82464269
  0.57650000   0.82464358
  0.57650000   0.82464448
  0.57650000   0.82464536
  0.57650000   0.82464625
  0.57650000   0.82464714
  0.57650000   0.82464802
  0.57650000   0.82464891
  0.57650000   0.82464979
  0.57650000   0.82465067
  0.57650000   0.82465155
  0.57650000   0.82465243
  0.57650000   0.82465331
  0.57650000   0.82465418
  0.57650000   0.82465506
  0.57650000   0.82465593
  0.57650000   0.82465680
  0.57650000   0.82465767
  0.57650000   0.82465854
  0.57650000   0.82465940
  0.57650000   0.82466027
  0.57700000   0.82463261
  0.57700000   0.82463352
  0.57700000   0.82463444
  0.57700000   0.82463535
  0.57700000   0.82463626
  0.57700000   0.82463717
  0.57700000   0.82463808
  0.57700000   0.82463899
  0.57700000   0.82463990
  0.57700000   0.82464080
  0.57700000   0.82464171
  0.57700000   0.82464261
  0.57700000   0.82464351
  0.57700000   0.82464441
  0.57700000   0.82464530
  0.57700000   0.82464620
  0.57700000   0.82464710
  0.57700000   0.82464799
  0.57700000   0.82464888
  0.57700000   0.82464977
  0.57700000   0.82465066
  0.57700000   0.82465155
  0.57700000   0.82465243
  0.57700000   0.82465332
  0.57700000   0.82465420
  0.57700000   0.82465508
  0.57700000   0.82465596
  0.57700000   0.82465684
  0.57700000   0.82465772
  0.57700000   0.82465860
  0.57700000   0.82465947
  0.57700000   0.82466034
  0.57700000   0.82466122
  0.57700000   0.82466209
  0.57700000   0.82466296
  0.57700000   0.82466382
  0.57700000   0.82466469
  0.57700000   0.82466556
  0.57700000   0.82466642
  0.57700000   0.82466728
  0.57750000   0.82463972
  0.57750000   0.82464063
  0.57750000   0.82464154
  0.57750000   0.82464245
  0.57750000   0.82464336
  0.57750000   0.82464427
  0.57750000   0.82464518
  0.57750000   0.82464608
  0.57750000   0.82464698
  0.57750000   0.82464788
  0.57750000   0.82464878
  0.57750000   0.82464968
  0.57750000   0.82465058
  0.57750000   0.82465148
  0.57750000   0.82465237
  0.57750000   0.82465326
  0.57750000   0.82465415
  0.57750000   0.82465504
  0.57750000   0.82465593
  0.57750000   0.82465682
  0.57750000   0.82465770
  0.57750000   0.82465859
  0.57750000   0.82465947
  0.57750000   0.82466035
  0.57750000   0.82466123
  0.57750000   0.82466211
  0.57750000   0.82466299
  0.57750000   0.82466386
  0.57750000   0.82466474
  0.57750000   0.82466561
  0.57750000   0.82466648
  0.57750000   0.82466735
  0.57750000   0.82466822
  0.57750000   0.82466909
  0.57750000   0.82466995
  0.57750000   0.82467082
  0.57750000   0.82467168
  0.57750000   0.82467254
  0.57750000   0.82467340
  0.57750000   0.82467426
  0.57800000   0.82464680
  0.57800000   0.82464771
  0.57800000   0.82464862
  0.57800000   0.82464953
  0.57800000   0.82465043
  0.57800000   0.82465134
  0.57800000   0.82465224
  0.57800000   0.82465314
  0.57800000   0.82465404
  0.57800000   0.82465494
  0.57800000   0.82465583
  0.57800000   0.82465673
  0.57800000   0.82465762
  0.57800000   0.82465851
  0.57800000   0.82465940
  0.57800000   0.82466029
  0.57800000   0.82466118
  0.57800000   0.82466207
  0.57800000   0.82466295
  0.57800000   0.82466384
  0.57800000   0.82466472
  0.57800000   0.82466560
  0.57800000   0.82466648
  0.57800000   0.82466736
  0.57800000   0.82466823
  0.57800000   0.82466911
  0.57800000   0.82466998
  0.57800000   0.82467085
  0.57800000   0.82467172
  0.57800000   0.82467259
  0.57800000   0.82467346
  0.57800000   0.82467433
  0.57800000   0.82467519
  0.57800000   0.82467606
  0.57800000   0.82467692
  0.57800000   0.82467778
  0.57800000   0.82467864
  0.57800000   0.82467950
  0.57800000   0.82468036
  0.57800000   0.82468121
  0.57850000   0.82465385
  0.57850000   0.82465476
  0.57850000   0.82465566
  0.57850000   0.82465657
  0.57850000   0.82465747
  0.57850000   0.82465837
  0.57850000   0.82465927
  0.57850000   0.82466017
  0.57850000   0.82466106
  0.57850000   0.82466196
  0.57850000   0.82466285
  0.57850000   0.82466374
  0.57850000   0.82466463
  0.57850000   0.82466552
  0.57850000   0.82466641
  0.57850000   0.82466729
  0.57850000   0.82466818
  0.57850000   0.82466906
  0.57850000   0.82466994
  0.57850000   0.82467082
  0.57850000   0.82467170
  0.57850000   0.82467258
  0.57850000   0.82467345
  0.57850000   0.82467433
  0.57850000   0.82467520
  0.57850000   0.82467607
  0.57850000   0.82467694
  0.57850000   0.82467781
  0.57850000   0.82467868
  0.57850000   0.82467955
  0.57850000   0.82468041
  0.57850000   0.82468127
  0.57850000   0.82468214
  0.57850000   0.82468300
  0.57850000   0.82468386
  0.57850000   0.82468471
  0.57850000   0.82468557
  0.57850000   0.82468643
  0.57850000   0.82468728
  0.57850000   0.82468813
  0.57900000   0.82466087
  0.57900000   0.82466178
  0.57900000   0.82466268
  0.57900000   0.82466358
  0.57900000   0.82466448
  0.57900000   0.82466537
  0.57900000   0.82466627
  0.57900000   0.82466716
  0.57900000   0.82466806
  0.57900000   0.82466895
  0.57900000   0.82466984
  0.57900000   0.82467072
  0.57900000   0.82467161
  0.57900000   0.82467250
  0.57900000   0.82467338
  0.57900000   0.82467426
  0.57900000   0.82467514
  0.57900000   0.82467602
  0.57900000   0.82467690
  0.57900000   0.82467778
  0.57900000   0.82467865
  0.57900000   0.82467953
  0.57900000   0.82468040
  0.57900000   0.82468127
  0.57900000   0.82468214
  0.57900000   0.82468301
  0.57900000   0.82468388
  0.57900000   0.82468474
  0.57900000   0.82468561
  0.57900000   0.82468647
  0.57900000   0.82468733
  0.57900000   0.82468819
  0.57900000   0.82468905
  0.57900000   0.82468991
  0.57900000   0.82469076
  0.57900000   0.82469162
  0.57900000   0.82469247
  0.57900000   0.82469332
  0.57900000   0.82469417
  0.57900000   0.82469502
  0.57950000   0.82466787
  0.57950000   0.82466876
  0.57950000   0.82466966
  0.57950000   0.82467056
  0.57950000   0.82467145
  0.57950000   0.82467235
  0.57950000   0.82467324
  0.57950000   0.82467413
  0.57950000   0.82467502
  0.57950000   0.82467591
  0.57950000   0.82467679
  0.57950000   0.82467768
  0.57950000   0.82467856
  0.57950000   0.82467944
  0.57950000   0.82468032
  0.57950000   0.82468120
  0.57950000   0.82468208
  0.57950000   0.82468296
  0.57950000   0.82468383
  0.57950000   0.82468470
  0.57950000   0.82468558
  0.57950000   0.82468645
  0.57950000   0.82468732
  0.57950000   0.82468818
  0.57950000   0.82468905
  0.57950000   0.82468991
  0.57950000   0.82469078
  0.57950000   0.82469164
  0.57950000   0.82469250
  0.57950000   0.82469336
  0.57950000   0.82469422
  0.57950000   0.82469508
  0.57950000   0.82469593
  0.57950000   0.82469678
  0.57950000   0.82469764
  0.57950000   0.82469849
  0.57950000   0.82469934
  0.57950000   0.82470019
  0.57950000   0.82470103
  0.57950000   0.82470188
  0.58000000   0.82467483
  0.58000000   0.82467572
  0.58000000   0.82467662
  0.58000000   0.82467751
  0.58000000   0.82467840
  0.58000000   0.82467929
  0.58000000   0.82468018
  0.58000000   0.82468107
  0.58000000   0.82468195
  0.58000000   0.82468284
  0.58000000   0.82468372
  0.58000000   0.82468460
  0.58000000   0.82468548
  0.58000000   0.82468636
  0.58000000   0.82468724
  0.58000000   0.82468811
  0.58000000   0.82468899
  0.58000000   0.82468986
  0.58000000   0.82469073
  0.58000000   0.82469160
  0.58000000   0.82469247
  0.58000000   0.82469334
  0.58000000   0.82469420
  0.58000000   0.82469507
  0.58000000   0.82469593
  0.58000000   0.82469679
  0.58000000   0.82469765
  0.58000000   0.82469851
  0.58000000   0.82469937
  0.58000000   0.82470022
  0.58000000   0.82470108
  0.58000000   0.82470193
  0.58000000   0.82470278
  0.58000000   0.82470363
  0.58000000   0.82470448
  0.58000000   0.82470533
  0.58000000   0.82470618
  0.58000000   0.82470702
  0.58000000   0.82470787
  0.58000000   0.82470871
  0.58050000   0.82468175
  0.58050000   0.82468265
  0.58050000   0.82468354
  0.58050000   0.82468443
  0.58050000   0.82468532
  0.58050000   0.82468620
  0.58050000   0.82468709
  0.58050000   0.82468797
  0.58050000   0.82468885
  0.58050000   0.82468973
  0.58050000   0.82469061
  0.58050000   0.82469149
  0.58050000   0.82469237
  0.58050000   0.82469324
  0.58050000   0.82469412
  0.58050000   0.82469499
  0.58050000   0.82469586
  0.58050000   0.82469673
  0.58050000   0.82469760
  0.58050000   0.82469846
  0.58050000   0.82469933
  0.58050000   0.82470019
  0.58050000   0.82470106
  0.58050000   0.82470192
  0.58050000   0.82470278
  0.58050000   0.82470364
  0.58050000   0.82470449
  0.58050000   0.82470535
  0.58050000   0.82470620
  0.58050000   0.82470705
  0.58050000   0.82470791
  0.58050000   0.82470876
  0.58050000   0.82470961
  0.58050000   0.82471045
  0.58050000   0.82471130
  0.58050000   0.82471214
  0.58050000   0.82471299
  0.58050000   0.82471383
  0.58050000   0.82471467
  0.58050000   0.82471551
  0.58100000   0.82468865
  0.58100000   0.82468954
  0.58100000   0.82469043
  0.58100000   0.82469132
  0.58100000   0.82469220
  0.58100000   0.82469308
  0.58100000   0.82469397
  0.58100000   0.82469485
  0.58100000   0.82469573
  0.58100000   0.82469660
  0.58100000   0.82469748
  0.58100000   0.82469835
  0.58100000   0.82469923
  0.58100000   0.82470010
  0.58100000   0.82470097
  0.58100000   0.82470184
  0.58100000   0.82470271
  0.58100000   0.82470357
  0.58100000   0.82470444
  0.58100000   0.82470530
  0.58100000   0.82470616
  0.58100000   0.82470702
  0.58100000   0.82470788
  0.58100000   0.82470874
  0.58100000   0.82470960
  0.58100000   0.82471045
  0.58100000   0.82471130
  0.58100000   0.82471216
  0.58100000   0.82471301
  0.58100000   0.82471386
  0.58100000   0.82471471
  0.58100000   0.82471555
  0.58100000   0.82471640
  0.58100000   0.82471724
  0.58100000   0.82471808
  0.58100000   0.82471893
  0.58100000   0.82471977
  0.58100000   0.82472060
  0.58100000   0.82472144
  0.58100000   0.82472228
  0.58150000   0.82469552
  0.58150000   0.82469641
  0.58150000   0.82469729
  0.58150000   0.82469818
  0.58150000   0.82469906
  0.58150000   0.82469994
  0.58150000   0.82470082
  0.58150000   0.82470169
  0.58150000   0.82470257
  0.58150000   0.82470344
  0.58150000   0.82470431
  0.58150000   0.82470519
  0.58150000   0.82470606
  0.58150000   0.82470692
  0.58150000   0.82470779
  0.58150000   0.82470866
  0.58150000   0.82470952
  0.58150000   0.82471038
  0.58150000   0.82471125
  0.58150000   0.82471211
  0.58150000   0.82471296
  0.58150000   0.82471382
  0.58150000   0.82471468
  0.58150000   0.82471553
  0.58150000   0.82471638
  0.58150000   0.82471724
  0.58150000   0.82471809
  0.58150000   0.82471894
  0.58150000   0.82471978
  0.58150000   0.82472063
  0.58150000   0.82472147
  0.58150000   0.82472232
  0.58150000   0.82472316
  0.58150000   0.82472400
  0.58150000   0.82472484
  0.58150000   0.82472568
  0.58150000   0.82472652
  0.58150000   0.82472735
  0.58150000   0.82472819
  0.58150000   0.82472902
  0.58200000   0.82470236
  0.58200000   0.82470325
  0.58200000   0.82470413
  0.58200000   0.82470501
  0.58200000   0.82470588
  0.58200000   0.82470676
  0.58200000   0.82470763
  0.58200000   0.82470851
  0.58200000   0.82470938
  0.58200000   0.82471025
  0.58200000   0.82471112
  0.58200000   0.82471199
  0.58200000   0.82471285
  0.58200000   0.82471372
  0.58200000   0.82471458
  0.58200000   0.82471545
  0.58200000   0.82471631
  0.58200000   0.82471717
  0.58200000   0.82471802
  0.58200000   0.82471888
  0.58200000   0.82471974
  0.58200000   0.82472059
  0.58200000   0.82472144
  0.58200000   0.82472229
  0.58200000   0.82472314
  0.58200000   0.82472399
  0.58200000   0.82472484
  0.58200000   0.82472568
  0.58200000   0.82472653
  0.58200000   0.82472737
  0.58200000   0.82472821
  0.58200000   0.82472905
  0.58200000   0.82472989
  0.58200000   0.82473073
  0.58200000   0.82473157
  0.58200000   0.82473240
  0.58200000   0.82473324
  0.58200000   0.82473407
  0.58200000   0.82473490
  0.58200000   0.82473573
  0.58250000   0.82470917
  0.58250000   0.82471005
  0.58250000   0.82471093
  0.58250000   0.82471181
  0.58250000   0.82471268
  0.58250000   0.82471355
  0.58250000   0.82471442
  0.58250000   0.82471529
  0.58250000   0.82471616
  0.58250000   0.82471703
  0.58250000   0.82471790
  0.58250000   0.82471876
  0.58250000   0.82471962
  0.58250000   0.82472049
  0.58250000   0.82472135
  0.58250000   0.82472221
  0.58250000   0.82472306
  0.58250000   0.82472392
  0.58250000   0.82472477
  0.58250000   0.82472563
  0.58250000   0.82472648
  0.58250000   0.82472733
  0.58250000   0.82472818
  0.58250000   0.82472903
  0.58250000   0.82472987
  0.58250000   0.82473072
  0.58250000   0.82473156
  0.58250000   0.82473240
  0.58250000   0.82473325
  0.58250000   0.82473409
  0.58250000   0.82473492
  0.58250000   0.82473576
  0.58250000   0.82473660
  0.58250000   0.82473743
  0.58250000   0.82473826
  0.58250000   0.82473910
  0.58250000   0.82473993
  0.58250000   0.82474076
  0.58250000   0.82474158
  0.58250000   0.82474241
  0.58300000   0.82471595
  0.58300000   0.82471683
  0.58300000   0.82471770
  0.58300000   0.82471857
  0.58300000   0.82471945
  0.58300000   0.82472032
  0.58300000   0.82472118
  0.58300000   0.82472205
  0.58300000   0.82472292
  0.58300000   0.82472378
  0.58300000   0.82472464
  0.58300000   0.82472550
  0.58300000   0.82472636
  0.58300000   0.82472722
  0.58300000   0.82472808
  0.58300000   0.82472893
  0.58300000   0.82472979
  0.58300000   0.82473064
  0.58300000   0.82473149
  0.58300000   0.82473234
  0.58300000   0.82473319
  0.58300000   0.82473404
  0.58300000   0.82473489
  0.58300000   0.82473573
  0.58300000   0.82473657
  0.58300000   0.82473742
  0.58300000   0.82473826
  0.58300000   0.82473909
  0.58300000   0.82473993
  0.58300000   0.82474077
  0.58300000   0.82474160
  0.58300000   0.82474244
  0.58300000   0.82474327
  0.58300000   0.82474410
  0.58300000   0.82474493
  0.58300000   0.82474576
  0.58300000   0.82474659
  0.58300000   0.82474741
  0.58300000   0.82474824
  0.58300000   0.82474906
  0.58350000   0.82472270
  0.58350000   0.82472358
  0.58350000   0.82472445
  0.58350000   0.82472532
  0.58350000   0.82472618
  0.58350000   0.82472705
  0.58350000   0.82472791
  0.58350000   0.82472878
  0.58350000   0.82472964
  0.58350000   0.82473050
  0.58350000   0.82473136
  0.58350000   0.82473222
  0.58350000   0.82473307
  0.58350000   0.82473393
  0.58350000   0.82473478
  0.58350000   0.82473564
  0.58350000   0.82473649
  0.58350000   0.82473734
  0.58350000   0.82473818
  0.58350000   0.82473903
  0.58350000   0.82473988
  0.58350000   0.82474072
  0.58350000   0.82474156
  0.58350000   0.82474240
  0.58350000   0.82474324
  0.58350000   0.82474408
  0.58350000   0.82474492
  0.58350000   0.82474576
  0.58350000   0.82474659
  0.58350000   0.82474742
  0.58350000   0.82474826
  0.58350000   0.82474909
  0.58350000   0.82474992
  0.58350000   0.82475074
  0.58350000   0.82475157
  0.58350000   0.82475240
  0.58350000   0.82475322
  0.58350000   0.82475404
  0.58350000   0.82475486
  0.58350000   0.82475568
  0.58400000   0.82472942
  0.58400000   0.82473029
  0.58400000   0.82473116
  0.58400000   0.82473203
  0.58400000   0.82473289
  0.58400000   0.82473375
  0.58400000   0.82473462
  0.58400000   0.82473548
  0.58400000   0.82473633
  0.58400000   0.82473719
  0.58400000   0.82473805
  0.58400000   0.82473890
  0.58400000   0.82473976
  0.58400000   0.82474061
  0.58400000   0.82474146
  0.58400000   0.82474231
  0.58400000   0.82474315
  0.58400000   0.82474400
  0.58400000   0.82474484
  0.58400000   0.82474569
  0.58400000   0.82474653
  0.58400000   0.82474737
  0.58400000   0.82474821
  0.58400000   0.82474905
  0.58400000   0.82474989
  0.58400000   0.82475072
  0.58400000   0.82475156
  0.58400000   0.82475239
  0.58400000   0.82475322
  0.58400000   0.82475405
  0.58400000   0.82475488
  0.58400000   0.82475571
  0.58400000   0.82475653
  0.58400000   0.82475736
  0.58400000   0.82475818
  0.58400000   0.82475900
  0.58400000   0.82475982
  0.58400000   0.82476064
  0.58400000   0.82476146
  0.58400000   0.82476228
  0.58450000   0.82473612
  0.58450000   0.82473698
  0.58450000   0.82473785
  0.58450000   0.82473871
  0.58450000   0.82473957
  0.58450000   0.82474043
  0.58450000   0.82474129
  0.58450000   0.82474214
  0.58450000   0.82474300
  0.58450000   0.82474385
  0.58450000   0.82474471
  0.58450000   0.82474556
  0.58450000   0.82474641
  0.58450000   0.82474726
  0.58450000   0.82474810
  0.58450000   0.82474895
  0.58450000   0.82474979
  0.58450000   0.82475064
  0.58450000   0.82475148
  0.58450000   0.82475232
  0.58450000   0.82475316
  0.58450000   0.82475399
  0.58450000   0.82475483
  0.58450000   0.82475566
  0.58450000   0.82475650
  0.58450000   0.82475733
  0.58450000   0.82475816
  0.58450000   0.82475899
  0.58450000   0.82475982
  0.58450000   0.82476065
  0.58450000   0.82476147
  0.58450000   0.82476230
  0.58450000   0.82476312
  0.58450000   0.82476394
  0.58450000   0.82476476
  0.58450000   0.82476558
  0.58450000   0.82476640
  0.58450000   0.82476721
  0.58450000   0.82476803
  0.58450000   0.82476884
  0.58500000   0.82474278
  0.58500000   0.82474364
  0.58500000   0.82474450
  0.58500000   0.82474536
  0.58500000   0.82474622
  0.58500000   0.82474707
  0.58500000   0.82474793
  0.58500000   0.82474878
  0.58500000   0.82474963
  0.58500000   0.82475049
  0.58500000   0.82475133
  0.58500000   0.82475218
  0.58500000   0.82475303
  0.58500000   0.82475387
  0.58500000   0.82475472
  0.58500000   0.82475556
  0.58500000   0.82475640
  0.58500000   0.82475724
  0.58500000   0.82475808
  0.58500000   0.82475892
  0.58500000   0.82475975
  0.58500000   0.82476059
  0.58500000   0.82476142
  0.58500000   0.82476225
  0.58500000   0.82476308
  0.58500000   0.82476391
  0.58500000   0.82476474
  0.58500000   0.82476556
  0.58500000   0.82476639
  0.58500000   0.82476721
  0.58500000   0.82476804
  0.58500000   0.82476886
  0.58500000   0.82476968
  0.58500000   0.82477049
  0.58500000   0.82477131
  0.58500000   0.82477213
  0.58500000   0.82477294
  0.58500000   0.82477376
  0.58500000   0.82477457
  0.58500000   0.82477538
  0.58550000   0.82474941
  0.58550000   0.82475027
  0.58550000   0.82475113
  0.58550000   0.82475198
  0.58550000   0.82475284
  0.58550000   0.82475369
  0.58550000   0.82475454
  0.58550000   0.82475539
  0.58550000   0.82475624
  0.58550000   0.82475709
  0.58550000   0.82475794
  0.58550000   0.82475878
  0.58550000   0.82475962
  0.58550000   0.82476047
  0.58550000   0.82476131
  0.58550000   0.82476214
  0.58550000   0.82476298
  0.58550000   0.82476382
  0.58550000   0.82476465
  0.58550000   0.82476549
  0.58550000   0.82476632
  0.58550000   0.82476715
  0.58550000   0.82476798
  0.58550000   0.82476881
  0.58550000   0.82476964
  0.58550000   0.82477046
  0.58550000   0.82477129
  0.58550000   0.82477211
  0.58550000   0.82477293
  0.58550000   0.82477375
  0.58550000   0.82477457
  0.58550000   0.82477539
  0.58550000   0.82477621
  0.58550000   0.82477702
  0.58550000   0.82477783
  0.58550000   0.82477865
  0.58550000   0.82477946
  0.58550000   0.82478027
  0.58550000   0.82478108
  0.58550000   0.82478188
  0.58600000   0.82475602
  0.58600000   0.82475687
  0.58600000   0.82475773
  0.58600000   0.82475858
  0.58600000   0.82475943
  0.58600000   0.82476028
  0.58600000   0.82476113
  0.58600000   0.82476197
  0.58600000   0.82476282
  0.58600000   0.82476366
  0.58600000   0.82476451
  0.58600000   0.82476535
  0.58600000   0.82476619
  0.58600000   0.82476703
  0.58600000   0.82476786
  0.58600000   0.82476870
  0.58600000   0.82476953
  0.58600000   0.82477037
  0.58600000   0.82477120
  0.58600000   0.82477203
  0.58600000   0.82477286
  0.58600000   0.82477369
  0.58600000   0.82477451
  0.58600000   0.82477534
  0.58600000   0.82477616
  0.58600000   0.82477699
  0.58600000   0.82477781
  0.58600000   0.82477863
  0.58600000   0.82477945
  0.58600000   0.82478026
  0.58600000   0.82478108
  0.58600000   0.82478189
  0.58600000   0.82478271
  0.58600000   0.82478352
  0.58600000   0.82478433
  0.58600000   0.82478514
  0.58600000   0.82478595
  0.58600000   0.82478675
  0.58600000   0.82478756
  0.58600000   0.82478836
  0.58650000   0.82476259
  0.58650000   0.82476344
  0.58650000   0.82476429
  0.58650000   0.82476514
  0.58650000   0.82476599
  0.58650000   0.82476684
  0.58650000   0.82476768
  0.58650000   0.82476853
  0.58650000   0.82476937
  0.58650000   0.82477021
  0.58650000   0.82477105
  0.58650000   0.82477189
  0.58650000   0.82477272
  0.58650000   0.82477356
  0.58650000   0.82477439
  0.58650000   0.82477523
  0.58650000   0.82477606
  0.58650000   0.82477689
  0.58650000   0.82477772
  0.58650000   0.82477854
  0.58650000   0.82477937
  0.58650000   0.82478019
  0.58650000   0.82478102
  0.58650000   0.82478184
  0.58650000   0.82478266
  0.58650000   0.82478348
  0.58650000   0.82478430
  0.58650000   0.82478511
  0.58650000   0.82478593
  0.58650000   0.82478674
  0.58650000   0.82478756
  0.58650000   0.82478837
  0.58650000   0.82478918
  0.58650000   0.82478999
  0.58650000   0.82479079
  0.58650000   0.82479160
  0.58650000   0.82479241
  0.58650000   0.82479321
  0.58650000   0.82479401
  0.58650000   0.82479481
  0.58700000   0.82476914
  0.58700000   0.82476999
  0.58700000   0.82477083
  0.58700000   0.82477168
  0.58700000   0.82477253
  0.58700000   0.82477337
  0.58700000   0.82477421
  0.58700000   0.82477505
  0.58700000   0.82477589
  0.58700000   0.82477673
  0.58700000   0.82477756
  0.58700000   0.82477840
  0.58700000   0.82477923
  0.58700000   0.82478006
  0.58700000   0.82478089
  0.58700000   0.82478172
  0.58700000   0.82478255
  0.58700000   0.82478338
  0.58700000   0.82478420
  0.58700000   0.82478503
  0.58700000   0.82478585
  0.58700000   0.82478667
  0.58700000   0.82478749
  0.58700000   0.82478831
  0.58700000   0.82478913
  0.58700000   0.82478995
  0.58700000   0.82479076
  0.58700000   0.82479157
  0.58700000   0.82479239
  0.58700000   0.82479320
  0.58700000   0.82479401
  0.58700000   0.82479482
  0.58700000   0.82479562
  0.58700000   0.82479643
  0.58700000   0.82479723
  0.58700000   0.82479804
  0.58700000   0.82479884
  0.58700000   0.82479964
  0.58700000   0.82480044
  0.58700000   0.82480124
  0.58750000   0.82477566
  0.58750000   0.82477650
  0.58750000   0.82477735
  0.58750000   0.82477819
  0.58750000   0.82477903
  0.58750000   0.82477987
  0.58750000   0.82478071
  0.58750000   0.82478155
  0.58750000   0.82478238
  0.58750000   0.82478322
  0.58750000   0.82478405
  0.58750000   0.82478488
  0.58750000   0.82478571
  0.58750000   0.82478654
  0.58750000   0.82478737
  0.58750000   0.82478819
  0.58750000   0.82478902
  0.58750000   0.82478984
  0.58750000   0.82479066
  0.58750000   0.82479149
  0.58750000   0.82479231
  0.58750000   0.82479312
  0.58750000   0.82479394
  0.58750000   0.82479476
  0.58750000   0.82479557
  0.58750000   0.82479638
  0.58750000   0.82479719
  0.58750000   0.82479801
  0.58750000   0.82479881
  0.58750000   0.82479962
  0.58750000   0.82480043
  0.58750000   0.82480123
  0.58750000   0.82480204
  0.58750000   0.82480284
  0.58750000   0.82480364
  0.58750000   0.82480444
  0.58750000   0.82480524
  0.58750000   0.82480604
  0.58750000   0.82480683
  0.58750000   0.82480763
  0.58800000   0.82478215
  0.58800000   0.82478299
  0.58800000   0.82478383
  0.58800000   0.82478467
  0.58800000   0.82478551
  0.58800000   0.82478634
  0.58800000   0.82478718
  0.58800000   0.82478801
  0.58800000   0.82478885
  0.58800000   0.82478968
  0.58800000   0.82479051
  0.58800000   0.82479133
  0.58800000   0.82479216
  0.58800000   0.82479299
  0.58800000   0.82479381
  0.58800000   0.82479464
  0.58800000   0.82479546
  0.58800000   0.82479628
  0.58800000   0.82479710
  0.58800000   0.82479791
  0.58800000   0.82479873
  0.58800000   0.82479955
  0.58800000   0.82480036
  0.58800000   0.82480117
  0.58800000   0.82480198
  0.58800000   0.82480279
  0.58800000   0.82480360
  0.58800000   0.82480441
  0.58800000   0.82480521
  0.58800000   0.82480602
  0.58800000   0.82480682
  0.58800000   0.82480762
  0.58800000   0.82480843
  0.58800000   0.82480922
  0.58800000   0.82481002
  0.58800000   0.82481082
  0.58800000   0.82481162
  0.58800000   0.82481241
  0.58800000   0.82481320
  0.58800000   0.82481399
  0.58850000   0.82478861
  0.58850000   0.82478945
  0.58850000   0.82479028
  0.58850000   0.82479112
  0.58850000   0.82479196
  0.58850000   0.82479279
  0.58850000   0.82479362
  0.58850000   0.82479445
  0.58850000   0.82479528
  0.58850000   0.82479611
  0.58850000   0.82479694
  0.58850000   0.82479776
  0.58850000   0.82479858
  0.58850000   0.82479941
  0.58850000   0.82480023
  0.58850000   0.82480105
  0.58850000   0.82480187
  0.58850000   0.82480268
  0.58850000   0.82480350
  0.58850000   0.82480431
  0.58850000   0.82480513
  0.58850000   0.82480594
  0.58850000   0.82480675
  0.58850000   0.82480756
  0.58850000   0.82480837
  0.58850000   0.82480917
  0.58850000   0.82480998
  0.58850000   0.82481078
  0.58850000   0.82481159
  0.58850000   0.82481239
  0.58850000   0.82481319
  0.58850000   0.82481399
  0.58850000   0.82481478
  0.58850000   0.82481558
  0.58850000   0.82481638
  0.58850000   0.82481717
  0.58850000   0.82481796
  0.58850000   0.82481875
  0.58850000   0.82481954
  0.58850000   0.82482033
  0.58900000   0.82479504
  0.58900000   0.82479588
  0.58900000   0.82479671
  0.58900000   0.82479754
  0.58900000   0.82479838
  0.58900000   0.82479921
  0.58900000   0.82480003
  0.58900000   0.82480086
  0.58900000   0.82480169
  0.58900000   0.82480251
  0.58900000   0.82480334
  0.58900000   0.82480416
  0.58900000   0.82480498
  0.58900000   0.82480580
  0.58900000   0.82480662
  0.58900000   0.82480743
  0.58900000   0.82480825
  0.58900000   0.82480906
  0.58900000   0.82480988
  0.58900000   0.82481069
  0.58900000   0.82481150
  0.58900000   0.82481231
  0.58900000   0.82481311
  0.58900000   0.82481392
  0.58900000   0.82481472
  0.58900000   0.82481553
  0.58900000   0.82481633
  0.58900000   0.82481713
  0.58900000   0.82481793
  0.58900000   0.82481873
  0.58900000   0.82481953
  0.58900000   0.82482032
  0.58900000   0.82482112
  0.58900000   0.82482191
  0.58900000   0.82482270
  0.58900000   0.82482349
  0.58900000   0.82482428
  0.58900000   0.82482507
  0.58900000   0.82482586
  0.58900000   0.82482664
  0.58950000   0.82480145
  0.58950000   0.82480228
  0.58950000   0.82480311
  0.58950000   0.82480394
  0.58950000   0.82480477
  0.58950000   0.82480559
  0.58950000   0.82480642
  0.58950000   0.82480724
  0.58950000   0.82480807
  0.58950000   0.82480889
  0.58950000   0.82480971
  0.58950000   0.82481053
  0.58950000   0.82481135
  0.58950000   0.82481216
  0.58950000   0.82481298
  0.58950000   0.82481379
  0.58950000   0.82481460
  0.58950000   0.82481541
  0.58950000   0.82481622
  0.58950000   0.82481703
  0.58950000   0.82481784
  0.58950000   0.82481864
  0.58950000   0.82481945
  0.58950000   0.82482025
  0.58950000   0.82482105
  0.58950000   0.82482185
  0.58950000   0.82482265
  0.58950000   0.82482345
  0.58950000   0.82482425
  0.58950000   0.82482504
  0.58950000   0.82482584
  0.58950000   0.82482663
  0.58950000   0.82482742
  0.58950000   0.82482821
  0.58950000   0.82482900
  0.58950000   0.82482979
  0.58950000   0.82483057
  0.58950000   0.82483136
  0.58950000   0.82483214
  0.58950000   0.82483292
  0.59000000   0.82480782
  0.59000000   0.82480865
  0.59000000   0.82480948
  0.59000000   0.82481031
  0.59000000   0.82481113
  0.59000000   0.82481196
  0.59000000   0.82481278
  0.59000000   0.82481360
  0.59000000   0.82481442
  0.59000000   0.82481524
  0.59000000   0.82481605
  0.59000000   0.82481687
  0.59000000   0.82481768
  0.59000000   0.82481850
  0.59000000   0.82481931
  0.59000000   0.82482012
  0.59000000   0.82482093
  0.59000000   0.82482174
  0.59000000   0.82482254
  0.59000000   0.82482335
  0.59000000   0.82482415
  0.59000000   0.82482495
  0.59000000   0.82482576
  0.59000000   0.82482655
  0.59000000   0.82482735
  0.59000000   0.82482815
  0.59000000   0.82482895
  0.59000000   0.82482974
  0.59000000   0.82483054
  0.59000000   0.82483133
  0.59000000   0.82483212
  0.59000000   0.82483291
  0.59000000   0.82483370
  0.59000000   0.82483448
  0.59000000   0.82483527
  0.59000000   0.82483605
  0.59000000   0.82483684
  0.59000000   0.82483762
  0.59000000   0.82483840
  0.59000000   0.82483918
  0.59050000   0.82481417
  0.59050000   0.82481500
  0.59050000   0.82481582
  0.59050000   0.82481665
  0.59050000   0.82481747
  0.59050000   0.82481829
  0.59050000   0.82481911
  0.59050000   0.82481993
  0.59050000   0.82482074
  0.59050000   0.82482156
  0.59050000   0.82482237
  0.59050000   0.82482318
  0.59050000   0.82482400
  0.59050000   0.82482481
  0.59050000   0.82482561
  0.59050000   0.82482642
  0.59050000   0.82482723
  0.59050000   0.82482803
  0.59050000   0.82482883
  0.59050000   0.82482964
  0.59050000   0.82483044
  0.59050000   0.82483124
  0.59050000   0.82483203
  0.59050000   0.82483283
  0.59050000   0.82483363
  0.59050000   0.82483442
  0.59050000   0.82483521
  0.59050000   0.82483601
  0.59050000   0.82483680
  0.59050000   0.82483759
  0.59050000   0.82483837
  0.59050000   0.82483916
  0.59050000   0.82483994
  0.59050000   0.82484073
  0.59050000   0.82484151
  0.59050000   0.82484229
  0.59050000   0.82484307
  0.59050000   0.82484385
  0.59050000   0.82484463
  0.59050000   0.82484541
  0.59100000   0.82482049
  0.59100000   0.82482132
  0.59100000   0.82482214
  0.59100000   0.82482296
  0.59100000   0.82482378
  0.59100000   0.82482459
  0.59100000   0.82482541
  0.59100000   0.82482623
  0.59100000   0.82482704
  0.59100000   0.82482785
  0.59100000   0.82482866
  0.59100000   0.82482947
  0.59100000   0.82483028
  0.59100000   0.82483109
  0.59100000   0.82483189
  0.59100000   0.82483269
  0.59100000   0.82483350
  0.59100000   0.82483430
  0.59100000   0.82483510
  0.59100000   0.82483590
  0.59100000   0.82483670
  0.59100000   0.82483749
  0.59100000   0.82483829
  0.59100000   0.82483908
  0.59100000   0.82483987
  0.59100000   0.82484066
  0.59100000   0.82484145
  0.59100000   0.82484224
  0.59100000   0.82484303
  0.59100000   0.82484382
  0.59100000   0.82484460
  0.59100000   0.82484538
  0.59100000   0.82484617
  0.59100000   0.82484695
  0.59100000   0.82484773
  0.59100000   0.82484851
  0.59100000   0.82484928
  0.59100000   0.82485006
  0.59100000   0.82485083
  0.59100000   0.82485161
  0.59150000   0.82482679
  0.59150000   0.82482761
  0.59150000   0.82482843
  0.59150000   0.82482924
  0.59150000   0.82483006
  0.59150000   0.82483087
  0.59150000   0.82483169
  0.59150000   0.82483250
  0.59150000   0.82483331
  0.59150000   0.82483412
  0.59150000   0.82483492
  0.59150000   0.82483573
  0.59150000   0.82483653
  0.59150000   0.82483734
  0.59150000   0.82483814
  0.59150000   0.82483894
  0.59150000   0.82483974
  0.59150000   0.82484054
  0.59150000   0.82484134
  0.59150000   0.82484213
  0.59150000   0.82484293
  0.59150000   0.82484372
  0.59150000   0.82484451
  0.59150000   0.82484530
  0.59150000   0.82484609
  0.59150000   0.82484688
  0.59150000   0.82484767
  0.59150000   0.82484845
  0.59150000   0.82484924
  0.59150000   0.82485002
  0.59150000   0.82485080
  0.59150000   0.82485158
  0.59150000   0.82485236
  0.59150000   0.82485314
  0.59150000   0.82485391
  0.59150000   0.82485469
  0.59150000   0.82485546
  0.59150000   0.82485624
  0.59150000   0.82485701
  0.59150000   0.82485778
  0.59200000   0.82483305
  0.59200000   0.82483387
  0.59200000   0.82483469
  0.59200000   0.82483550
  0.59200000   0.82483631
  0.59200000   0.82483712
  0.59200000   0.82483793
  0.59200000   0.82483874
  0.59200000   0.82483955
  0.59200000   0.82484035
  0.59200000   0.82484116
  0.59200000   0.82484196
  0.59200000   0.82484276
  0.59200000   0.82484356
  0.59200000   0.82484436
  0.59200000   0.82484516
  0.59200000   0.82484596
  0.59200000   0.82484675
  0.59200000   0.82484755
  0.59200000   0.82484834
  0.59200000   0.82484913
  0.59200000   0.82484992
  0.59200000   0.82485071
  0.59200000   0.82485150
  0.59200000   0.82485228
  0.59200000   0.82485307
  0.59200000   0.82485385
  0.59200000   0.82485463
  0.59200000   0.82485541
  0.59200000   0.82485619
  0.59200000   0.82485697
  0.59200000   0.82485775
  0.59200000   0.82485853
  0.59200000   0.82485930
  0.59200000   0.82486008
  0.59200000   0.82486085
  0.59200000   0.82486162
  0.59200000   0.82486239
  0.59200000   0.82486316
  0.59200000   0.82486392
  0.59250000   0.82483929
  0.59250000   0.82484011
  0.59250000   0.82484092
  0.59250000   0.82484173
  0.59250000   0.82484254
  0.59250000   0.82484335
  0.59250000   0.82484415
  0.59250000   0.82484496
  0.59250000   0.82484576
  0.59250000   0.82484656
  0.59250000   0.82484737
  0.59250000   0.82484817
  0.59250000   0.82484896
  0.59250000   0.82484976
  0.59250000   0.82485056
  0.59250000   0.82485135
  0.59250000   0.82485215
  0.59250000   0.82485294
  0.59250000   0.82485373
  0.59250000   0.82485452
  0.59250000   0.82485531
  0.59250000   0.82485609
  0.59250000   0.82485688
  0.59250000   0.82485766
  0.59250000   0.82485845
  0.59250000   0.82485923
  0.59250000   0.82486001
  0.59250000   0.82486079
  0.59250000   0.82486157
  0.59250000   0.82486234
  0.59250000   0.82486312
  0.59250000   0.82486389
  0.59250000   0.82486467
  0.59250000   0.82486544
  0.59250000   0.82486621
  0.59250000   0.82486698
  0.59250000   0.82486775
  0.59250000   0.82486851
  0.59250000   0.82486928
  0.59250000   0.82487004
  0.59300000   0.82484551
  0.59300000   0.82484632
  0.59300000   0.82484712
  0.59300000   0.82484793
  0.59300000   0.82484874
  0.59300000   0.82484954
  0.59300000   0.82485035
  0.59300000   0.82485115
  0.59300000   0.82485195
  0.59300000   0.82485275
  0.59300000   0.82485355
  0.59300000   0.82485434
  0.59300000   0.82485514
  0.59300000   0.82485593
  0.59300000   0.82485672
  0.59300000   0.82485752
  0.59300000   0.82485831
  0.59300000   0.82485910
  0.59300000   0.82485988
  0.59300000   0.82486067
  0.59300000   0.82486146
  0.59300000   0.82486224
  0.59300000   0.82486302
  0.59300000   0.82486380
  0.59300000   0.82486458
  0.59300000   0.82486536
  0.59300000   0.82486614
  0.59300000   0.82486692
  0.59300000   0.82486769
  0.59300000   0.82486846
  0.59300000   0.82486924
  0.59300000   0.82487001
  0.59300000   0.82487078
  0.59300000   0.82487155
  0.59300000   0.82487232
  0.59300000   0.82487308
  0.59300000   0.82487385
  0.59300000   0.82487461
  0.59300000   0.82487537
  0.59300000   0.82487614
  0.59350000   0.82485169
  0.59350000   0.82485250
  0.59350000   0.82485330
  0.59350000   0.82485411
  0.59350000   0.82485491
  0.59350000   0.82485571
  0.59350000   0.82485651
  0.59350000   0.82485731
  0.59350000   0.82485811
  0.59350000   0.82485890
  0.59350000   0.82485970
  0.59350000   0.82486049
  0.59350000   0.82486128
  0.59350000   0.82486208
  0.59350000   0.82486287
  0.59350000   0.82486365
  0.59350000   0.82486444
  0.59350000   0.82486523
  0.59350000   0.82486601
  0.59350000   0.82486680
  0.59350000   0.82486758
  0.59350000   0.82486836
  0.59350000   0.82486914
  0.59350000   0.82486992
  0.59350000   0.82487069
  0.59350000   0.82487147
  0.59350000   0.82487224
  0.59350000   0.82487302
  0.59350000   0.82487379
  0.59350000   0.82487456
  0.59350000   0.82487533
  0.59350000   0.82487610
  0.59350000   0.82487686
  0.59350000   0.82487763
  0.59350000   0.82487840
  0.59350000   0.82487916
  0.59350000   0.82487992
  0.59350000   0.82488068
  0.59350000   0.82488144
  0.59350000   0.82488220
  0.59400000   0.82485785
  0.59400000   0.82485865
  0.59400000   0.82485945
  0.59400000   0.82486025
  0.59400000   0.82486105
  0.59400000   0.82486185
  0.59400000   0.82486265
  0.59400000   0.82486345
  0.59400000   0.82486424
  0.59400000   0.82486503
  0.59400000   0.82486582
  0.59400000   0.82486662
  0.59400000   0.82486740
  0.59400000   0.82486819
  0.59400000   0.82486898
  0.59400000   0.82486976
  0.59400000   0.82487055
  0.59400000   0.82487133
  0.59400000   0.82487211
  0.59400000   0.82487289
  0.59400000   0.82487367
  0.59400000   0.82487445
  0.59400000   0.82487523
  0.59400000   0.82487600
  0.59400000   0.82487678
  0.59400000   0.82487755
  0.59400000   0.82487832
  0.59400000   0.82487909
  0.59400000   0.82487986
  0.59400000   0.82488063
  0.59400000   0.82488139
  0.59400000   0.82488216
  0.59400000   0.82488292
  0.59400000   0.82488369
  0.59400000   0.82488445
  0.59400000   0.82488521
  0.59400000   0.82488597
  0.59400000   0.82488673
  0.59400000   0.82488748
  0.59400000   0.82488824
  0.59450000   0.82486398
  0.59450000   0.82486478
  0.59450000   0.82486558
  0.59450000   0.82486638
  0.59450000   0.82486717
  0.59450000   0.82486797
  0.59450000   0.82486876
  0.59450000   0.82486955
  0.59450000   0.82487035
  0.59450000   0.82487114
  0.59450000   0.82487192
  0.59450000   0.82487271
  0.59450000   0.82487350
  0.59450000   0.82487428
  0.59450000   0.82487507
  0.59450000   0.82487585
  0.59450000   0.82487663
  0.59450000   0.82487741
  0.59450000   0.82487819
  0.59450000   0.82487897
  0.59450000   0.82487974
  0.59450000   0.82488052
  0.59450000   0.82488129
  0.59450000   0.82488206
  0.59450000   0.82488283
  0.59450000   0.82488360
  0.59450000   0.82488437
  0.59450000   0.82488514
  0.59450000   0.82488590
  0.59450000   0.82488667
  0.59450000   0.82488743
  0.59450000   0.82488820
  0.59450000   0.82488896
  0.59450000   0.82488972
  0.59450000   0.82489047
  0.59450000   0.82489123
  0.59450000   0.82489199
  0.59450000   0.82489274
  0.59450000   0.82489350
  0.59450000   0.82489425
  0.59500000   0.82487008
  0.59500000   0.82487088
  0.59500000   0.82487167
  0.59500000   0.82487247
  0.59500000   0.82487326
  0.59500000   0.82487406
  0.59500000   0.82487485
  0.59500000   0.82487564
  0.59500000   0.82487642
  0.59500000   0.82487721
  0.59500000   0.82487800
  0.59500000   0.82487878
  0.59500000   0.82487956
  0.59500000   0.82488035
  0.59500000   0.82488113
  0.59500000   0.82488191
  0.59500000   0.82488268
  0.59500000   0.82488346
  0.59500000   0.82488424
  0.59500000   0.82488501
  0.59500000   0.82488578
  0.59500000   0.82488656
  0.59500000   0.82488733
  0.59500000   0.82488810
  0.59500000   0.82488886
  0.59500000   0.82488963
  0.59500000   0.82489040
  0.59500000   0.82489116
  0.59500000   0.82489192
  0.59500000   0.82489268
  0.59500000   0.82489344
  0.59500000   0.82489420
  0.59500000   0.82489496
  0.59500000   0.82489572
  0.59500000   0.82489647
  0.59500000   0.82489723
  0.59500000   0.82489798
  0.59500000   0.82489873
  0.59500000   0.82489949
  0.59500000   0.82490024
  0.59550000   0.82487616
  0.59550000   0.82487695
  0.59550000   0.82487775
  0.59550000   0.82487854
  0.59550000   0.82487933
  0.59550000   0.82488012
  0.59550000   0.82488090
  0.59550000   0.82488169
  0.59550000   0.82488248
  0.59550000   0.82488326
  0.59550000   0.82488404
  0.59550000   0.82488482
  0.59550000   0.82488560
  0.59550000   0.82488638
  0.59550000   0.82488716
  0.59550000   0.82488794
  0.59550000   0.82488871
  0.59550000   0.82488949
  0.59550000   0.82489026
  0.59550000   0.82489103
  0.59550000   0.82489180
  0.59550000   0.82489257
  0.59550000   0.82489334
  0.59550000   0.82489410
  0.59550000   0.82489487
  0.59550000   0.82489563
  0.59550000   0.82489639
  0.59550000   0.82489715
  0.59550000   0.82489791
  0.59550000   0.82489867
  0.59550000   0.82489943
  0.59550000   0.82490019
  0.59550000   0.82490094
  0.59550000   0.82490170
  0.59550000   0.82490245
  0.59550000   0.82490320
  0.59550000   0.82490395
  0.59550000   0.82490470
  0.59550000   0.82490545
  0.59550000   0.82490619
  0.59600000   0.82488221
  0.59600000   0.82488300
  0.59600000   0.82488379
  0.59600000   0.82488458
  0.59600000   0.82488537
  0.59600000   0.82488615
  0.59600000   0.82488694
  0.59600000   0.82488772
  0.59600000   0.82488850
  0.59600000   0.82488928
  0.59600000   0.82489006
  0.59600000   0.82489084
  0.59600000   0.82489162
  0.59600000   0.82489239
  0.59600000   0.82489317
  0.59600000   0.82489394
  0.59600000   0.82489471
  0.59600000   0.82489548
  0.59600000   0.82489625
  0.59600000   0.82489702
  0.59600000   0.82489779
  0.59600000   0.82489855
  0.59600000   0.82489932
  0.59600000   0.82490008
  0.59600000   0.82490084
  0.59600000   0.82490160
  0.59600000   0.82490236
  0.59600000   0.82490312
  0.59600000   0.82490388
  0.59600000   0.82490464
  0.59600000   0.82490539
  0.59600000   0.82490614
  0.59600000   0.82490690
  0.59600000   0.82490765
  0.59600000   0.82490840
  0.59600000   0.82490914
  0.59600000   0.82490989
  0.59600000   0.82491064
  0.59600000   0.82491138
  0.59600000   0.82491213
  0.59650000   0.82488823
  0.59650000   0.82488902
  0.59650000   0.82488981
  0.59650000   0.82489059
  0.59650000   0.82489138
  0.59650000   0.82489216
  0.59650000   0.82489294
  0.59650000   0.82489372
  0.59650000   0.82489450
  0.59650000   0.82489528
  0.59650000   0.82489606
  0.59650000   0.82489683
  0.59650000   0.82489760
  0.59650000   0.82489838
  0.59650000   0.82489915
  0.59650000   0.82489992
  0.59650000   0.82490069
  0.59650000   0.82490146
  0.59650000   0.82490222
  0.59650000   0.82490299
  0.59650000   0.82490375
  0.59650000   0.82490451
  0.59650000   0.82490528
  0.59650000   0.82490604
  0.59650000   0.82490679
  0.59650000   0.82490755
  0.59650000   0.82490831
  0.59650000   0.82490906
  0.59650000   0.82490982
  0.59650000   0.82491057
  0.59650000   0.82491132
  0.59650000   0.82491207
  0.59650000   0.82491282
  0.59650000   0.82491357
  0.59650000   0.82491432
  0.59650000   0.82491506
  0.59650000   0.82491581
  0.59650000   0.82491655
  0.59650000   0.82491729
  0.59650000   0.82491803
  0.59700000   0.82489423
  0.59700000   0.82489501
  0.59700000   0.82489580
  0.59700000   0.82489658
  0.59700000   0.82489736
  0.59700000   0.82489814
  0.59700000   0.82489892
  0.59700000   0.82489970
  0.59700000   0.82490047
  0.59700000   0.82490125
  0.59700000   0.82490202
  0.59700000   0.82490279
  0.59700000   0.82490357
  0.59700000   0.82490434
  0.59700000   0.82490510
  0.59700000   0.82490587
  0.59700000   0.82490664
  0.59700000   0.82490740
  0.59700000   0.82490816
  0.59700000   0.82490893
  0.59700000   0.82490969
  0.59700000   0.82491045
  0.59700000   0.82491121
  0.59700000   0.82491196
  0.59700000   0.82491272
  0.59700000   0.82491347
  0.59700000   0.82491423
  0.59700000   0.82491498
  0.59700000   0.82491573
  0.59700000   0.82491648
  0.59700000   0.82491723
  0.59700000   0.82491798
  0.59700000   0.82491872
  0.59700000   0.82491947
  0.59700000   0.82492021
  0.59700000   0.82492096
  0.59700000   0.82492170
  0.59700000   0.82492244
  0.59700000   0.82492318
  0.59700000   0.82492391
  0.59750000   0.82490020
  0.59750000   0.82490098
  0.59750000   0.82490176
  0.59750000   0.82490254
  0.59750000   0.82490332
  0.59750000   0.82490410
  0.59750000   0.82490487
  0.59750000   0.82490565
  0.59750000   0.82490642
  0.59750000   0.82490719
  0.59750000   0.82490796
  0.59750000   0.82490873
  0.59750000   0.82490950
  0.59750000   0.82491027
  0.59750000   0.82491103
  0.59750000   0.82491180
  0.59750000   0.82491256
  0.59750000   0.82491332
  0.59750000   0.82491408
  0.59750000   0.82491484
  0.59750000   0.82491560
  0.59750000   0.82491636
  0.59750000   0.82491711
  0.59750000   0.82491786
  0.59750000   0.82491862
  0.59750000   0.82491937
  0.59750000   0.82492012
  0.59750000   0.82492087
  0.59750000   0.82492162
  0.59750000   0.82492237
  0.59750000   0.82492311
  0.59750000   0.82492386
  0.59750000   0.82492460
  0.59750000   0.82492534
  0.59750000   0.82492608
  0.59750000   0.82492682
  0.59750000   0.82492756
  0.59750000   0.82492830
  0.59750000   0.82492903
  0.59750000   0.82492977
  0.59800000   0.82490615
  0.59800000   0.82490692
  0.59800000   0.82490770
  0.59800000   0.82490848
  0.59800000   0.82490925
  0.59800000   0.82491003
  0.59800000   0.82491080
  0.59800000   0.82491157
  0.59800000   0.82491234
  0.59800000   0.82491311
  0.59800000   0.82491388
  0.59800000   0.82491464
  0.59800000   0.82491541
  0.59800000   0.82491617
  0.59800000   0.82491693
  0.59800000   0.82491770
  0.59800000   0.82491846
  0.59800000   0.82491921
  0.59800000   0.82491997
  0.59800000   0.82492073
  0.59800000   0.82492148
  0.59800000   0.82492224
  0.59800000   0.82492299
  0.59800000   0.82492374
  0.59800000   0.82492449
  0.59800000   0.82492524
  0.59800000   0.82492599
  0.59800000   0.82492673
  0.59800000   0.82492748
  0.59800000   0.82492822
  0.59800000   0.82492897
  0.59800000   0.82492971
  0.59800000   0.82493045
  0.59800000   0.82493119
  0.59800000   0.82493193
  0.59800000   0.82493266
  0.59800000   0.82493340
  0.59800000   0.82493413
  0.59800000   0.82493487
  0.59800000   0.82493560
  0.59850000   0.82491206
  0.59850000   0.82491284
  0.59850000   0.82491362
  0.59850000   0.82491439
  0.59850000   0.82491516
  0.59850000   0.82491593
  0.59850000   0.82491670
  0.59850000   0.82491747
  0.59850000   0.82491824
  0.59850000   0.82491900
  0.59850000   0.82491977
  0.59850000   0.82492053
  0.59850000   0.82492129
  0.59850000   0.82492205
  0.59850000   0.82492281
  0.59850000   0.82492357
  0.59850000   0.82492433
  0.59850000   0.82492508
  0.59850000   0.82492584
  0.59850000   0.82492659
  0.59850000   0.82492734
  0.59850000   0.82492809
  0.59850000   0.82492884
  0.59850000   0.82492959
  0.59850000   0.82493034
  0.59850000   0.82493108
  0.59850000   0.82493183
  0.59850000   0.82493257
  0.59850000   0.82493331
  0.59850000   0.82493406
  0.59850000   0.82493480
  0.59850000   0.82493553
  0.59850000   0.82493627
  0.59850000   0.82493701
  0.59850000   0.82493774
  0.59850000   0.82493848
  0.59850000   0.82493921
  0.59850000   0.82493994
  0.59850000   0.82494067
  0.59850000   0.82494140
  0.59900000   0.82491796
  0.59900000   0.82491873
  0.59900000   0.82491950
  0.59900000   0.82492027
  0.59900000   0.82492104
  0.59900000   0.82492181
  0.59900000   0.82492258
  0.59900000   0.82492334
  0.59900000   0.82492410
  0.59900000   0.82492487
  0.59900000   0.82492563
  0.59900000   0.82492639
  0.59900000   0.82492715
  0.59900000   0.82492791
  0.59900000   0.82492866
  0.59900000   0.82492942
  0.59900000   0.82493017
  0.59900000   0.82493092
  0.59900000   0.82493168
  0.59900000   0.82493243
  0.59900000   0.82493318
  0.59900000   0.82493392
  0.59900000   0.82493467
  0.59900000   0.82493541
  0.59900000   0.82493616
  0.59900000   0.82493690
  0.59900000   0.82493764
  0.59900000   0.82493838
  0.59900000   0.82493912
  0.59900000   0.82493986
  0.59900000   0.82494060
  0.59900000   0.82494134
  0.59900000   0.82494207
  0.59900000   0.82494280
  0.59900000   0.82494354
  0.59900000   0.82494427
  0.59900000   0.82494500
  0.59900000   0.82494573
  0.59900000   0.82494645
  0.59900000   0.82494718
  0.59950000   0.82492382
  0.59950000   0.82492459
  0.59950000   0.82492536
  0.59950000   0.82492613
  0.59950000   0.82492690
  0.59950000   0.82492766
  0.59950000   0.82492842
  0.59950000   0.82492919
  0.59950000   0.82492995
  0.59950000   0.82493071
  0.59950000   0.82493147
  0.59950000   0.82493222
  0.59950000   0.82493298
  0.59950000   0.82493373
  0.59950000   0.82493449
  0.59950000   0.82493524
  0.59950000   0.82493599
  0.59950000   0.82493674
  0.59950000   0.82493749
  0.59950000   0.82493824
  0.59950000   0.82493898
  0.59950000   0.82493973
  0.59950000   0.82494047
  0.59950000   0.82494121
  0.59950000   0.82494195
  0.59950000   0.82494270
  0.59950000   0.82494343
  0.59950000   0.82494417
  0.59950000   0.82494491
  0.59950000   0.82494564
  0.59950000   0.82494638
  0.59950000   0.82494711
  0.59950000   0.82494784
  0.59950000   0.82494857
  0.59950000   0.82494930
  0.59950000   0.82495003
  0.59950000   0.82495076
  0.59950000   0.82495148
  0.59950000   0.82495221
  0.59950000   0.82495293
  0.60000000   0.82492967
  0.60000000   0.82493043
  0.60000000   0.82493120
  0.60000000   0.82493196
  0.60000000   0.82493273
  0.60000000   0.82493349
  0.60000000   0.82493425
  0.60000000   0.82493501
  0.60000000   0.82493577
  0.60000000   0.82493652
  0.60000000   0.82493728
  0.60000000   0.82493803
  0.60000000   0.82493878
  0.60000000   0.82493954
  0.60000000   0.82494029
  0.60000000   0.82494104
  0.60000000   0.82494178
  0.60000000   0.82494253
  0.60000000   0.82494328
  0.60000000   0.82494402
  0.60000000   0.82494476
  0.60000000   0.82494551
  0.60000000   0.82494625
  0.60000000   0.82494699
  0.60000000   0.82494773
  0.60000000   0.82494846
  0.60000000   0.82494920
  0.60000000   0.82494993
  0.60000000   0.82495067
  0.60000000   0.82495140
  0.60000000   0.82495213
  0.60000000   0.82495286
  0.60000000   0.82495359
  0.60000000   0.82495432
  0.60000000   0.82495504
  0.60000000   0.82495577
  0.60000000   0.82495649
  0.60000000   0.82495722
  0.60000000   0.82495794
  0.60000000   0.82495866
  0.60050000   0.82493548
  0.60050000   0.82493625
  0.60050000   0.82493701
  0.60050000   0.82493777
  0.60050000   0.82493853
  0.60050000   0.82493929
  0.60050000   0.82494005
  0.60050000   0.82494080
  0.60050000   0.82494156
  0.60050000   0.82494231
  0.60050000   0.82494306
  0.60050000   0.82494381
  0.60050000   0.82494456
  0.60050000   0.82494531
  0.60050000   0.82494606
  0.60050000   0.82494681
  0.60050000   0.82494755
  0.60050000   0.82494830
  0.60050000   0.82494904
  0.60050000   0.82494978
  0.60050000   0.82495052
  0.60050000   0.82495126
  0.60050000   0.82495200
  0.60050000   0.82495273
  0.60050000   0.82495347
  0.60050000   0.82495420
  0.60050000   0.82495494
  0.60050000   0.82495567
  0.60050000   0.82495640
  0.60050000   0.82495713
  0.60050000   0.82495786
  0.60050000   0.82495859
  0.60050000   0.82495931
  0.60050000   0.82496004
  0.60050000   0.82496076
  0.60050000   0.82496148
  0.60050000   0.82496220
  0.60050000   0.82496292
  0.60050000   0.82496364
  0.60050000   0.82496436
  0.60100000   0.82494127
  0.60100000   0.82494203
  0.60100000   0.82494279
  0.60100000   0.82494355
  0.60100000   0.82494431
  0.60100000   0.82494506
  0.60100000   0.82494582
  0.60100000   0.82494657
  0.60100000   0.82494732
  0.60100000   0.82494807
  0.60100000   0.82494882
  0.60100000   0.82494957
  0.60100000   0.82495032
  0.60100000   0.82495107
  0.60100000   0.82495181
  0.60100000   0.82495255
  0.60100000   0.82495330
  0.60100000   0.82495404
  0.60100000   0.82495478
  0.60100000   0.82495551
  0.60100000   0.82495625
  0.60100000   0.82495699
  0.60100000   0.82495772
  0.60100000   0.82495846
  0.60100000   0.82495919
  0.60100000   0.82495992
  0.60100000   0.82496065
  0.60100000   0.82496138
  0.60100000   0.82496211
  0.60100000   0.82496283
  0.60100000   0.82496356
  0.60100000   0.82496428
  0.60100000   0.82496501
  0.60100000   0.82496573
  0.60100000   0.82496645
  0.60100000   0.82496717
  0.60100000   0.82496789
  0.60100000   0.82496861
  0.60100000   0.82496932
  0.60100000   0.82497004
  0.60150000   0.82494704
  0.60150000   0.82494780
  0.60150000   0.82494855
  0.60150000   0.82494931
  0.60150000   0.82495006
  0.60150000   0.82495081
  0.60150000   0.82495157
  0.60150000   0.82495232
  0.60150000   0.82495306
  0.60150000   0.82495381
  0.60150000   0.82495456
  0.60150000   0.82495530
  0.60150000   0.82495605
  0.60150000   0.82495679
  0.60150000   0.82495753
  0.60150000   0.82495827
  0.60150000   0.82495901
  0.60150000   0.82495975
  0.60150000   0.82496049
  0.60150000   0.82496122
  0.60150000   0.82496196
  0.60150000   0.82496269
  0.60150000   0.82496342
  0.60150000   0.82496415
  0.60150000   0.82496488
  0.60150000   0.82496561
  0.60150000   0.82496634
  0.60150000   0.82496707
  0.60150000   0.82496779
  0.60150000   0.82496851
  0.60150000   0.82496924
  0.60150000   0.82496996
  0.60150000   0.82497068
  0.60150000   0.82497140
  0.60150000   0.82497212
  0.60150000   0.82497283
  0.60150000   0.82497355
  0.60150000   0.82497426
  0.60150000   0.82497498
  0.60150000   0.82497569
  0.60200000   0.82495278
  0.60200000   0.82495353
  0.60200000   0.82495429
  0.60200000   0.82495504
  0.60200000   0.82495579
  0.60200000   0.82495654
  0.60200000   0.82495729
  0.60200000   0.82495803
  0.60200000   0.82495878
  0.60200000   0.82495953
  0.60200000   0.82496027
  0.60200000   0.82496101
  0.60200000   0.82496175
  0.60200000   0.82496249
  0.60200000   0.82496323
  0.60200000   0.82496397
  0.60200000   0.82496471
  0.60200000   0.82496544
  0.60200000   0.82496617
  0.60200000   0.82496691
  0.60200000   0.82496764
  0.60200000   0.82496837
  0.60200000   0.82496910
  0.60200000   0.82496983
  0.60200000   0.82497055
  0.60200000   0.82497128
  0.60200000   0.82497200
  0.60200000   0.82497273
  0.60200000   0.82497345
  0.60200000   0.82497417
  0.60200000   0.82497489
  0.60200000   0.82497561
  0.60200000   0.82497633
  0.60200000   0.82497704
  0.60200000   0.82497776
  0.60200000   0.82497847
  0.60200000   0.82497918
  0.60200000   0.82497990
  0.60200000   0.82498061
  0.60200000   0.82498132
  0.60250000   0.82495849
  0.60250000   0.82495924
  0.60250000   0.82495999
  0.60250000   0.82496074
  0.60250000   0.82496149
  0.60250000   0.82496224
  0.60250000   0.82496298
  0.60250000   0.82496373
  0.60250000   0.82496447
  0.60250000   0.82496521
  0.60250000   0.82496595
  0.60250000   0.82496669
  0.60250000   0.82496743
  0.60250000   0.82496817
  0.60250000   0.82496891
  0.60250000   0.82496964
  0.60250000   0.82497037
  0.60250000   0.82497111
  0.60250000   0.82497184
  0.60250000   0.82497257
  0.60250000   0.82497330
  0.60250000   0.82497402
  0.60250000   0.82497475
  0.60250000   0.82497547
  0.60250000   0.82497620
  0.60250000   0.82497692
  0.60250000   0.82497764
  0.60250000   0.82497836
  0.60250000   0.82497908
  0.60250000   0.82497980
  0.60250000   0.82498052
  0.60250000   0.82498123
  0.60250000   0.82498195
  0.60250000   0.82498266
  0.60250000   0.82498337
  0.60250000   0.82498408
  0.60250000   0.82498479
  0.60250000   0.82498550
  0.60250000   0.82498621
  0.60250000   0.82498692
  0.60300000   0.82496418
  0.60300000   0.82496493
  0.60300000   0.82496568
  0.60300000   0.82496642
  0.60300000   0.82496717
  0.60300000   0.82496791
  0.60300000   0.82496866
  0.60300000   0.82496940
  0.60300000   0.82497014
  0.60300000   0.82497088
  0.60300000   0.82497161
  0.60300000   0.82497235
  0.60300000   0.82497309
  0.60300000   0.82497382
  0.60300000   0.82497455
  0.60300000   0.82497529
  0.60300000   0.82497602
  0.60300000   0.82497675
  0.60300000   0.82497747
  0.60300000   0.82497820
  0.60300000   0.82497893
  0.60300000   0.82497965
  0.60300000   0.82498037
  0.60300000   0.82498110
  0.60300000   0.82498182
  0.60300000   0.82498254
  0.60300000   0.82498326
  0.60300000   0.82498397
  0.60300000   0.82498469
  0.60300000   0.82498541
  0.60300000   0.82498612
  0.60300000   0.82498683
  0.60300000   0.82498754
  0.60300000   0.82498826
  0.60300000   0.82498896
  0.60300000   0.82498967
  0.60300000   0.82499038
  0.60300000   0.82499109
  0.60300000   0.82499179
  0.60300000   0.82499249
  0.60350000   0.82496985
  0.60350000   0.82497059
  0.60350000   0.82497134
  0.60350000   0.82497208
  0.60350000   0.82497282
  0.60350000   0.82497356
  0.60350000   0.82497430
  0.60350000   0.82497504
  0.60350000   0.82497578
  0.60350000   0.82497651
  0.60350000   0.82497725
  0.60350000   0.82497798
  0.60350000   0.82497872
  0.60350000   0.82497945
  0.60350000   0.82498018
  0.60350000   0.82498091
  0.60350000   0.82498163
  0.60350000   0.82498236
  0.60350000   0.82498309
  0.60350000   0.82498381
  0.60350000   0.82498453
  0.60350000   0.82498525
  0.60350000   0.82498597
  0.60350000   0.82498669
  0.60350000   0.82498741
  0.60350000   0.82498813
  0.60350000   0.82498885
  0.60350000   0.82498956
  0.60350000   0.82499027
  0.60350000   0.82499099
  0.60350000   0.82499170
  0.60350000   0.82499241
  0.60350000   0.82499312
  0.60350000   0.82499382
  0.60350000   0.82499453
  0.60350000   0.82499524
  0.60350000   0.82499594
  0.60350000   0.82499664
  0.60350000   0.82499735
  0.60350000   0.82499805
  0.60400000   0.82497548
  0.60400000   0.82497623
  0.60400000   0.82497697
  0.60400000   0.82497771
  0.60400000   0.82497845
  0.60400000   0.82497919
  0.60400000   0.82497992
  0.60400000   0.82498066
  0.60400000   0.82498139
  0.60400000   0.82498213
  0.60400000   0.82498286
  0.60400000   0.82498359
  0.60400000   0.82498432
  0.60400000   0.82498505
  0.60400000   0.82498578
  0.60400000   0.82498650
  0.60400000   0.82498723
  0.60400000   0.82498795
  0.60400000   0.82498867
  0.60400000   0.82498939
  0.60400000   0.82499011
  0.60400000   0.82499083
  0.60400000   0.82499155
  0.60400000   0.82499227
  0.60400000   0.82499298
  0.60400000   0.82499370
  0.60400000   0.82499441
  0.60400000   0.82499512
  0.60400000   0.82499583
  0.60400000   0.82499654
  0.60400000   0.82499725
  0.60400000   0.82499796
  0.60400000   0.82499866
  0.60400000   0.82499937
  0.60400000   0.82500007
  0.60400000   0.82500078
  0.60400000   0.82500148
  0.60400000   0.82500218
  0.60400000   0.82500288
  0.60400000   0.82500358
  0.60450000   0.82498110
  0.60450000   0.82498184
  0.60450000   0.82498258
  0.60450000   0.82498332
  0.60450000   0.82498405
  0.60450000   0.82498479
  0.60450000   0.82498552
  0.60450000   0.82498625
  0.60450000   0.82498699
  0.60450000   0.82498772
  0.60450000   0.82498845
  0.60450000   0.82498917
  0.60450000   0.82498990
  0.60450000   0.82499063
  0.60450000   0.82499135
  0.60450000   0.82499207
  0.60450000   0.82499280
  0.60450000   0.82499352
  0.60450000   0.82499424
  0.60450000   0.82499495
  0.60450000   0.82499567
  0.60450000   0.82499639
  0.60450000   0.82499710
  0.60450000   0.82499782
  0.60450000   0.82499853
  0.60450000   0.82499924
  0.60450000   0.82499995
  0.60450000   0.82500066
  0.60450000   0.82500137
  0.60450000   0.82500207
  0.60450000   0.82500278
  0.60450000   0.82500348
  0.60450000   0.82500419
  0.60450000   0.82500489
  0.60450000   0.82500559
  0.60450000   0.82500629
  0.60450000   0.82500699
  0.60450000   0.82500769
  0.60450000   0.82500838
  0.60450000   0.82500908
  0.60500000   0.82498669
  0.60500000   0.82498743
  0.60500000   0.82498816
  0.60500000   0.82498890
  0.60500000   0.82498963
  0.60500000   0.82499036
  0.60500000   0.82499109
  0.60500000   0.82499182
  0.60500000   0.82499255
  0.60500000   0.82499328
  0.60500000   0.82499401
  0.60500000   0.82499473
  0.60500000   0.82499546
  0.60500000   0.82499618
  0.60500000   0.82499690
  0.60500000   0.82499762
  0.60500000   0.82499834
  0.60500000   0.82499906
  0.60500000   0.82499977
  0.60500000   0.82500049
  0.60500000   0.82500120
  0.60500000   0.82500192
  0.60500000   0.82500263
  0.60500000   0.82500334
  0.60500000   0.82500405
  0.60500000   0.82500476
  0.60500000   0.82500547
  0.60500000   0.82500617
  0.60500000   0.82500688
  0.60500000   0.82500758
  0.60500000   0.82500828
  0.60500000   0.82500899
  0.60500000   0.82500969
  0.60500000   0.82501039
  0.60500000   0.82501108
  0.60500000   0.82501178
  0.60500000   0.82501248
  0.60500000   0.82501317
  0.60500000   0.82501387
  0.60500000   0.82501456
  0.60550000   0.82499226
  0.60550000   0.82499299
  0.60550000   0.82499372
  0.60550000   0.82499445
  0.60550000   0.82499519
  0.60550000   0.82499591
  0.60550000   0.82499664
  0.60550000   0.82499737
  0.60550000   0.82499810
  0.60550000   0.82499882
  0.60550000   0.82499954
  0.60550000   0.82500027
  0.60550000   0.82500099
  0.60550000   0.82500171
  0.60550000   0.82500243
  0.60550000   0.82500314
  0.60550000   0.82500386
  0.60550000   0.82500457
  0.60550000   0.82500529
  0.60550000   0.82500600
  0.60550000   0.82500671
  0.60550000   0.82500742
  0.60550000   0.82500813
  0.60550000   0.82500884
  0.60550000   0.82500955
  0.60550000   0.82501025
  0.60550000   0.82501096
  0.60550000   0.82501166
  0.60550000   0.82501236
  0.60550000   0.82501306
  0.60550000   0.82501376
  0.60550000   0.82501446
  0.60550000   0.82501516
  0.60550000   0.82501586
  0.60550000   0.82501655
  0.60550000   0.82501725
  0.60550000   0.82501794
  0.60550000   0.82501863
  0.60550000   0.82501932
  0.60550000   0.82502001
  0.60600000   0.82499780
  0.60600000   0.82499853
  0.60600000   0.82499926
  0.60600000   0.82499999
  0.60600000   0.82500071
  0.60600000   0.82500144
  0.60600000   0.82500217
  0.60600000   0.82500289
  0.60600000   0.82500361
  0.60600000   0.82500434
  0.60600000   0.82500506
  0.60600000   0.82500578
  0.60600000   0.82500649
  0.60600000   0.82500721
  0.60600000   0.82500793
  0.60600000   0.82500864
  0.60600000   0.82500935
  0.60600000   0.82501007
  0.60600000   0.82501078
  0.60600000   0.82501149
  0.60600000   0.82501220
  0.60600000   0.82501290
  0.60600000   0.82501361
  0.60600000   0.82501432
  0.60600000   0.82501502
  0.60600000   0.82501572
  0.60600000   0.82501642
  0.60600000   0.82501713
  0.60600000   0.82501782
  0.60600000   0.82501852
  0.60600000   0.82501922
  0.60600000   0.82501992
  0.60600000   0.82502061
  0.60600000   0.82502131
  0.60600000   0.82502200
  0.60600000   0.82502269
  0.60600000   0.82502338
  0.60600000   0.82502407
  0.60600000   0.82502476
  0.60600000   0.82502545
  0.60650000   0.82500331
  0.60650000   0.82500404
  0.60650000   0.82500477
  0.60650000   0.82500550
  0.60650000   0.82500622
  0.60650000   0.82500694
  0.60650000   0.82500767
  0.60650000   0.82500839
  0.60650000   0.82500911
  0.60650000   0.82500983
  0.60650000   0.82501054
  0.60650000   0.82501126
  0.60650000   0.82501198
  0.60650000   0.82501269
  0.60650000   0.82501340
  0.60650000   0.82501411
  0.60650000   0.82501483
  0.60650000   0.82501553
  0.60650000   0.82501624
  0.60650000   0.82501695
  0.60650000   0.82501766
  0.60650000   0.82501836
  0.60650000   0.82501906
  0.60650000   0.82501977
  0.60650000   0.82502047
  0.60650000   0.82502117
  0.60650000   0.82502187
  0.60650000   0.82502257
  0.60650000   0.82502326
  0.60650000   0.82502396
  0.60650000   0.82502465
  0.60650000   0.82502535
  0.60650000   0.82502604
  0.60650000   0.82502673
  0.60650000   0.82502742
  0.60650000   0.82502811
  0.60650000   0.82502880
  0.60650000   0.82502948
  0.60650000   0.82503017
  0.60650000   0.82503085
  0.60700000   0.82500881
  0.60700000   0.82500953
  0.60700000   0.82501026
  0.60700000   0.82501098
  0.60700000   0.82501170
  0.60700000   0.82501242
  0.60700000   0.82501314
  0.60700000   0.82501386
  0.60700000   0.82501458
  0.60700000   0.82501529
  0.60700000   0.82501601
  0.60700000   0.82501672
  0.60700000   0.82501743
  0.60700000   0.82501815
  0.60700000   0.82501886
  0.60700000   0.82501956
  0.60700000   0.82502027
  0.60700000   0.82502098
  0.60700000   0.82502168
  0.60700000   0.82502239
  0.60700000   0.82502309
  0.60700000   0.82502379
  0.60700000   0.82502449
  0.60700000   0.82502519
  0.60700000   0.82502589
  0.60700000   0.82502659
  0.60700000   0.82502729
  0.60700000   0.82502798
  0.60700000   0.82502868
  0.60700000   0.82502937
  0.60700000   0.82503006
  0.60700000   0.82503075
  0.60700000   0.82503144
  0.60700000   0.82503213
  0.60700000   0.82503282
  0.60700000   0.82503350
  0.60700000   0.82503419
  0.60700000   0.82503487
  0.60700000   0.82503555
  0.60700000   0.82503624
  0.60750000   0.82501427
  0.60750000   0.82501500
  0.60750000   0.82501572
  0.60750000   0.82501644
  0.60750000   0.82501716
  0.60750000   0.82501788
  0.60750000   0.82501859
  0.60750000   0.82501931
  0.60750000   0.82502002
  0.60750000   0.82502074
  0.60750000   0.82502145
  0.60750000   0.82502216
  0.60750000   0.82502287
  0.60750000   0.82502358
  0.60750000   0.82502428
  0.60750000   0.82502499
  0.60750000   0.82502570
  0.60750000   0.82502640
  0.60750000   0.82502710
  0.60750000   0.82502780
  0.60750000   0.82502850
  0.60750000   0.82502920
  0.60750000   0.82502990
  0.60750000   0.82503060
  0.60750000   0.82503129
  0.60750000   0.82503199
  0.60750000   0.82503268
  0.60750000   0.82503337
  0.60750000   0.82503407
  0.60750000   0.82503476
  0.60750000   0.82503545
  0.60750000   0.82503613
  0.60750000   0.82503682
  0.60750000   0.82503751
  0.60750000   0.82503819
  0.60750000   0.82503887
  0.60750000   0.82503956
  0.60750000   0.82504024
  0.60750000   0.82504092
  0.60750000   0.82504160
  0.60800000   0.82501972
  0.60800000   0.82502044
  0.60800000   0.82502116
  0.60800000   0.82502188
  0.60800000   0.82502259
  0.60800000   0.82502331
  0.60800000   0.82502402
  0.60800000   0.82502473
  0.60800000   0.82502544
  0.60800000   0.82502615
  0.60800000   0.82502686
  0.60800000   0.82502757
  0.60800000   0.82502828
  0.60800000   0.82502898
  0.60800000   0.82502969
  0.60800000   0.82503039
  0.60800000   0.82503109
  0.60800000   0.82503180
  0.60800000   0.82503250
  0.60800000   0.82503319
  0.60800000   0.82503389
  0.60800000   0.82503459
  0.60800000   0.82503528
  0.60800000   0.82503598
  0.60800000   0.82503667
  0.60800000   0.82503736
  0.60800000   0.82503805
  0.60800000   0.82503874
  0.60800000   0.82503943
  0.60800000   0.82504012
  0.60800000   0.82504081
  0.60800000   0.82504149
  0.60800000   0.82504217
  0.60800000   0.82504286
  0.60800000   0.82504354
  0.60800000   0.82504422
  0.60800000   0.82504490
  0.60800000   0.82504558
  0.60800000   0.82504626
  0.60800000   0.82504693
  0.60850000   0.82502514
  0.60850000   0.82502586
  0.60850000   0.82502657
  0.60850000   0.82502729
  0.60850000   0.82502800
  0.60850000   0.82502871
  0.60850000   0.82502942
  0.60850000   0.82503013
  0.60850000   0.82503084
  0.60850000   0.82503155
  0.60850000   0.82503226
  0.60850000   0.82503296
  0.60850000   0.82503367
  0.60850000   0.82503437
  0.60850000   0.82503507
  0.60850000   0.82503577
  0.60850000   0.82503647
  0.60850000   0.82503717
  0.60850000   0.82503787
  0.60850000   0.82503856
  0.60850000   0.82503926
  0.60850000   0.82503995
  0.60850000   0.82504064
  0.60850000   0.82504133
  0.60850000   0.82504202
  0.60850000   0.82504271
  0.60850000   0.82504340
  0.60850000   0.82504409
  0.60850000   0.82504477
  0.60850000   0.82504546
  0.60850000   0.82504614
  0.60850000   0.82504682
  0.60850000   0.82504751
  0.60850000   0.82504819
  0.60850000   0.82504887
  0.60850000   0.82504954
  0.60850000   0.82505022
  0.60850000   0.82505090
  0.60850000   0.82505157
  0.60850000   0.82505225
  0.60900000   0.82503054
  0.60900000   0.82503125
  0.60900000   0.82503196
  0.60900000   0.82503268
  0.60900000   0.82503339
  0.60900000   0.82503410
  0.60900000   0.82503480
  0.60900000   0.82503551
  0.60900000   0.82503622
  0.60900000   0.82503692
  0.60900000   0.82503762
  0.60900000   0.82503833
  0.60900000   0.82503903
  0.60900000   0.82503973
  0.60900000   0.82504043
  0.60900000   0.82504113
  0.60900000   0.82504182
  0.60900000   0.82504252
  0.60900000   0.82504321
  0.60900000   0.82504390
  0.60900000   0.82504460
  0.60900000   0.82504529
  0.60900000   0.82504598
  0.60900000   0.82504667
  0.60900000   0.82504735
  0.60900000   0.82504804
  0.60900000   0.82504873
  0.60900000   0.82504941
  0.60900000   0.82505009
  0.60900000   0.82505077
  0.60900000   0.82505146
  0.60900000   0.82505214
  0.60900000   0.82505281
  0.60900000   0.82505349
  0.60900000   0.82505417
  0.60900000   0.82505484
  0.60900000   0.82505552
  0.60900000   0.82505619
  0.60900000   0.82505686
  0.60900000   0.82505753
  0.60950000   0.82503591
  0.60950000   0.82503662
  0.60950000   0.82503733
  0.60950000   0.82503804
  0.60950000   0.82503875
  0.60950000   0.82503945
  0.60950000   0.82504016
  0.60950000   0.82504086
  0.60950000   0.82504157
  0.60950000   0.82504227
  0.60950000   0.82504297
  0.60950000   0.82504367
  0.60950000   0.82504437
  0.60950000   0.82504506
  0.60950000   0.82504576
  0.60950000   0.82504646
  0.60950000   0.82504715
  0.60950000   0.82504784
  0.60950000   0.82504853
  0.60950000   0.82504922
  0.60950000   0.82504991
  0.60950000   0.82505060
  0.60950000   0.82505129
  0.60950000   0.82505198
  0.60950000   0.82505266
  0.60950000   0.82505334
  0.60950000   0.82505403
  0.60950000   0.82505471
  0.60950000   0.82505539
  0.60950000   0.82505607
  0.60950000   0.82505675
  0.60950000   0.82505742
  0.60950000   0.82505810
  0.60950000   0.82505877
  0.60950000   0.82505945
  0.60950000   0.82506012
  0.60950000   0.82506079
  0.60950000   0.82506146
  0.60950000   0.82506213
  0.60950000   0.82506280
  0.61000000   0.82504126
  0.61000000   0.82504197
  0.61000000   0.82504267
  0.61000000   0.82504338
  0.61000000   0.82504409
  0.61000000   0.82504479
  0.61000000   0.82504549
  0.61000000   0.82504619
  0.61000000   0.82504689
  0.61000000   0.82504759
  0.61000000   0.82504829
  0.61000000   0.82504899
  0.61000000   0.82504968
  0.61000000   0.82505038
  0.61000000   0.82505107
  0.61000000   0.82505176
  0.61000000   0.82505245
  0.61000000   0.82505314
  0.61000000   0.82505383
  0.61000000   0.82505452
  0.61000000   0.82505521
  0.61000000   0.82505589
  0.61000000   0.82505658
  0.61000000   0.82505726
  0.61000000   0.82505794
  0.61000000   0.82505862
  0.61000000   0.82505930
  0.61000000   0.82505998
  0.61000000   0.82506066
  0.61000000   0.82506134
  0.61000000   0.82506201
  0.61000000   0.82506269
  0.61000000   0.82506336
  0.61000000   0.82506403
  0.61000000   0.82506470
  0.61000000   0.82506537
  0.61000000   0.82506604
  0.61000000   0.82506671
  0.61000000   0.82506738
  0.61000000   0.82506804
  0.61050000   0.82504658
  0.61050000   0.82504729
  0.61050000   0.82504799
  0.61050000   0.82504870
  0.61050000   0.82504940
  0.61050000   0.82505010
  0.61050000   0.82505080
  0.61050000   0.82505150
  0.61050000   0.82505220
  0.61050000   0.82505289
  0.61050000   0.82505359
  0.61050000   0.82505428
  0.61050000   0.82505498
  0.61050000   0.82505567
  0.61050000   0.82505636
  0.61050000   0.82505705
  0.61050000   0.82505774
  0.61050000   0.82505842
  0.61050000   0.82505911
  0.61050000   0.82505979
  0.61050000   0.82506048
  0.61050000   0.82506116
  0.61050000   0.82506184
  0.61050000   0.82506252
  0.61050000   0.82506320
  0.61050000   0.82506388
  0.61050000   0.82506456
  0.61050000   0.82506523
  0.61050000   0.82506591
  0.61050000   0.82506658
  0.61050000   0.82506726
  0.61050000   0.82506793
  0.61050000   0.82506860
  0.61050000   0.82506927
  0.61050000   0.82506994
  0.61050000   0.82507060
  0.61050000   0.82507127
  0.61050000   0.82507193
  0.61050000   0.82507260
  0.61050000   0.82507326
  0.61100000   0.82505189
  0.61100000   0.82505259
  0.61100000   0.82505329
  0.61100000   0.82505399
  0.61100000   0.82505469
  0.61100000   0.82505539
  0.61100000   0.82505609
  0.61100000   0.82505678
  0.61100000   0.82505748
  0.61100000   0.82505817
  0.61100000   0.82505886
  0.61100000   0.82505955
  0.61100000   0.82506024
  0.61100000   0.82506093
  0.61100000   0.82506162
  0.61100000   0.82506231
  0.61100000   0.82506299
  0.61100000   0.82506368
  0.61100000   0.82506436
  0.61100000   0.82506504
  0.61100000   0.82506573
  0.61100000   0.82506641
  0.61100000   0.82506708
  0.61100000   0.82506776
  0.61100000   0.82506844
  0.61100000   0.82506911
  0.61100000   0.82506979
  0.61100000   0.82507046
  0.61100000   0.82507113
  0.61100000   0.82507181
  0.61100000   0.82507248
  0.61100000   0.82507314
  0.61100000   0.82507381
  0.61100000   0.82507448
  0.61100000   0.82507514
  0.61100000   0.82507581
  0.61100000   0.82507647
  0.61100000   0.82507714
  0.61100000   0.82507780
  0.61100000   0.82507846
  0.61150000   0.82505717
  0.61150000   0.82505787
  0.61150000   0.82505856
  0.61150000   0.82505926
  0.61150000   0.82505996
  0.61150000   0.82506065
  0.61150000   0.82506135
  0.61150000   0.82506204
  0.61150000   0.82506273
  0.61150000   0.82506342
  0.61150000   0.82506411
  0.61150000   0.82506480
  0.61150000   0.82506549
  0.61150000   0.82506618
  0.61150000   0.82506686
  0.61150000   0.82506755
  0.61150000   0.82506823
  0.61150000   0.82506891
  0.61150000   0.82506959
  0.61150000   0.82507027
  0.61150000   0.82507095
  0.61150000   0.82507163
  0.61150000   0.82507230
  0.61150000   0.82507298
  0.61150000   0.82507365
  0.61150000   0.82507432
  0.61150000   0.82507500
  0.61150000   0.82507567
  0.61150000   0.82507634
  0.61150000   0.82507700
  0.61150000   0.82507767
  0.61150000   0.82507834
  0.61150000   0.82507900
  0.61150000   0.82507967
  0.61150000   0.82508033
  0.61150000   0.82508099
  0.61150000   0.82508165
  0.61150000   0.82508231
  0.61150000   0.82508297
  0.61150000   0.82508363
  0.61200000   0.82506242
  0.61200000   0.82506312
  0.61200000   0.82506381
  0.61200000   0.82506451
  0.61200000   0.82506520
  0.61200000   0.82506590
  0.61200000   0.82506659
  0.61200000   0.82506728
  0.61200000   0.82506797
  0.61200000   0.82506866
  0.61200000   0.82506934
  0.61200000   0.82507003
  0.61200000   0.82507071
  0.61200000   0.82507140
  0.61200000   0.82507208
  0.61200000   0.82507276
  0.61200000   0.82507344
  0.61200000   0.82507412
  0.61200000   0.82507480
  0.61200000   0.82507547
  0.61200000   0.82507615
  0.61200000   0.82507682
  0.61200000   0.82507750
  0.61200000   0.82507817
  0.61200000   0.82507884
  0.61200000   0.82507951
  0.61200000   0.82508018
  0.61200000   0.82508085
  0.61200000   0.82508152
  0.61200000   0.82508218
  0.61200000   0.82508285
  0.61200000   0.82508351
  0.61200000   0.82508417
  0.61200000   0.82508483
  0.61200000   0.82508549
  0.61200000   0.82508615
  0.61200000   0.82508681
  0.61200000   0.82508747
  0.61200000   0.82508813
  0.61200000   0.82508878
  0.61250000   0.82506765
  0.61250000   0.82506835
  0.61250000   0.82506904
  0.61250000   0.82506973
  0.61250000   0.82507042
  0.61250000   0.82507111
  0.61250000   0.82507180
  0.61250000   0.82507249
  0.61250000   0.82507318
  0.61250000   0.82507386
  0.61250000   0.82507455
  0.61250000   0.82507523
  0.61250000   0.82507591
  0.61250000   0.82507659
  0.61250000   0.82507727
  0.61250000   0.82507795
  0.61250000   0.82507863
  0.61250000   0.82507931
  0.61250000   0.82507998
  0.61250000   0.82508065
  0.61250000   0.82508133
  0.61250000   0.82508200
  0.61250000   0.82508267
  0.61250000   0.82508334
  0.61250000   0.82508401
  0.61250000   0.82508468
  0.61250000   0.82508534
  0.61250000   0.82508601
  0.61250000   0.82508667
  0.61250000   0.82508734
  0.61250000   0.82508800
  0.61250000   0.82508866
  0.61250000   0.82508932
  0.61250000   0.82508998
  0.61250000   0.82509064
  0.61250000   0.82509129
  0.61250000   0.82509195
  0.61250000   0.82509260
  0.61250000   0.82509326
  0.61250000   0.82509391
  0.61300000   0.82507286
  0.61300000   0.82507355
  0.61300000   0.82507425
  0.61300000   0.82507494
  0.61300000   0.82507562
  0.61300000   0.82507631
  0.61300000   0.82507700
  0.61300000   0.82507768
  0.61300000   0.82507837
  0.61300000   0.82507905
  0.61300000   0.82507973
  0.61300000   0.82508041
  0.61300000   0.82508109
  0.61300000   0.82508177
  0.61300000   0.82508244
  0.61300000   0.82508312
  0.61300000   0.82508379
  0.61300000   0.82508447
  0.61300000   0.82508514
  0.61300000   0.82508581
  0.61300000   0.82508648
  0.61300000   0.82508715
  0.61300000   0.82508782
  0.61300000   0.82508849
  0.61300000   0.82508915
  0.61300000   0.82508982
  0.61300000   0.82509048
  0.61300000   0.82509114
  0.61300000   0.82509181
  0.61300000   0.82509247
  0.61300000   0.82509313
  0.61300000   0.82509378
  0.61300000   0.82509444
  0.61300000   0.82509510
  0.61300000   0.82509575
  0.61300000   0.82509641
  0.61300000   0.82509706
  0.61300000   0.82509771
  0.61300000   0.82509836
  0.61300000   0.82509901
  0.61350000   0.82507805
  0.61350000   0.82507874
  0.61350000   0.82507943
  0.61350000   0.82508011
  0.61350000   0.82508080
  0.61350000   0.82508148
  0.61350000   0.82508217
  0.61350000   0.82508285
  0.61350000   0.82508353
  0.61350000   0.82508421
  0.61350000   0.82508489
  0.61350000   0.82508557
  0.61350000   0.82508624
  0.61350000   0.82508692
  0.61350000   0.82508759
  0.61350000   0.82508827
  0.61350000   0.82508894
  0.61350000   0.82508961
  0.61350000   0.82509028
  0.61350000   0.82509095
  0.61350000   0.82509162
  0.61350000   0.82509228
  0.61350000   0.82509295
  0.61350000   0.82509361
  0.61350000   0.82509427
  0.61350000   0.82509494
  0.61350000   0.82509560
  0.61350000   0.82509626
  0.61350000   0.82509692
  0.61350000   0.82509758
  0.61350000   0.82509823
  0.61350000   0.82509889
  0.61350000   0.82509954
  0.61350000   0.82510020
  0.61350000   0.82510085
  0.61350000   0.82510150
  0.61350000   0.82510215
  0.61350000   0.82510280
  0.61350000   0.82510345
  0.61350000   0.82510410
  0.61400000   0.82508321
  0.61400000   0.82508390
  0.61400000   0.82508459
  0.61400000   0.82508527
  0.61400000   0.82508595
  0.61400000   0.82508663
  0.61400000   0.82508731
  0.61400000   0.82508799
  0.61400000   0.82508867
  0.61400000   0.82508935
  0.61400000   0.82509003
  0.61400000   0.82509070
  0.61400000   0.82509137
  0.61400000   0.82509205
  0.61400000   0.82509272
  0.61400000   0.82509339
  0.61400000   0.82509406
  0.61400000   0.82509473
  0.61400000   0.82509539
  0.61400000   0.82509606
  0.61400000   0.82509672
  0.61400000   0.82509739
  0.61400000   0.82509805
  0.61400000   0.82509871
  0.61400000   0.82509937
  0.61400000   0.82510003
  0.61400000   0.82510069
  0.61400000   0.82510135
  0.61400000   0.82510201
  0.61400000   0.82510266
  0.61400000   0.82510332
  0.61400000   0.82510397
  0.61400000   0.82510462
  0.61400000   0.82510527
  0.61400000   0.82510592
  0.61400000   0.82510657
  0.61400000   0.82510722
  0.61400000   0.82510786
  0.61400000   0.82510851
  0.61400000   0.82510916
  0.61450000   0.82508835
  0.61450000   0.82508904
  0.61450000   0.82508972
  0.61450000   0.82509040
  0.61450000   0.82509108
  0.61450000   0.82509176
  0.61450000   0.82509244
  0.61450000   0.82509312
  0.61450000   0.82509379
  0.61450000   0.82509447
  0.61450000   0.82509514
  0.61450000   0.82509581
  0.61450000   0.82509648
  0.61450000   0.82509715
  0.61450000   0.82509782
  0.61450000   0.82509849
  0.61450000   0.82509916
  0.61450000   0.82509982
  0.61450000   0.82510049
  0.61450000   0.82510115
  0.61450000   0.82510181
  0.61450000   0.82510247
  0.61450000   0.82510313
  0.61450000   0.82510379
  0.61450000   0.82510445
  0.61450000   0.82510511
  0.61450000   0.82510576
  0.61450000   0.82510642
  0.61450000   0.82510707
  0.61450000   0.82510772
  0.61450000   0.82510838
  0.61450000   0.82510903
  0.61450000   0.82510968
  0.61450000   0.82511032
  0.61450000   0.82511097
  0.61450000   0.82511162
  0.61450000   0.82511226
  0.61450000   0.82511291
  0.61450000   0.82511355
  0.61450000   0.82511419
  0.61500000   0.82509347
  0.61500000   0.82509415
  0.61500000   0.82509483
  0.61500000   0.82509551
  0.61500000   0.82509619
  0.61500000   0.82509687
  0.61500000   0.82509754
  0.61500000   0.82509822
  0.61500000   0.82509889
  0.61500000   0.82509956
  0.61500000   0.82510023
  0.61500000   0.82510090
  0.61500000   0.82510157
  0.61500000   0.82510224
  0.61500000   0.82510290
  0.61500000   0.82510357
  0.61500000   0.82510423
  0.61500000   0.82510489
  0.61500000   0.82510556
  0.61500000   0.82510622
  0.61500000   0.82510688
  0.61500000   0.82510754
  0.61500000   0.82510819
  0.61500000   0.82510885
  0.61500000   0.82510950
  0.61500000   0.82511016
  0.61500000   0.82511081
  0.61500000   0.82511146
  0.61500000   0.82511212
  0.61500000   0.82511277
  0.61500000   0.82511341
  0.61500000   0.82511406
  0.61500000   0.82511471
  0.61500000   0.82511535
  0.61500000   0.82511600
  0.61500000   0.82511664
  0.61500000   0.82511729
  0.61500000   0.82511793
  0.61500000   0.82511857
  0.61500000   0.82511921
  0.61550000   0.82509857
  0.61550000   0.82509925
  0.61550000   0.82509992
  0.61550000   0.82510060
  0.61550000   0.82510127
  0.61550000   0.82510195
  0.61550000   0.82510262
  0.61550000   0.82510329
  0.61550000   0.82510396
  0.61550000   0.82510463
  0.61550000   0.82510530
  0.61550000   0.82510597
  0.61550000   0.82510663
  0.61550000   0.82510730
  0.61550000   0.82510796
  0.61550000   0.82510862
  0.61550000   0.82510928
  0.61550000   0.82510994
  0.61550000   0.82511060
  0.61550000   0.82511126
  0.61550000   0.82511192
  0.61550000   0.82511257
  0.61550000   0.82511323
  0.61550000   0.82511388
  0.61550000   0.82511454
  0.61550000   0.82511519
  0.61550000   0.82511584
  0.61550000   0.82511649
  0.61550000   0.82511714
  0.61550000   0.82511778
  0.61550000   0.82511843
  0.61550000   0.82511908
  0.61550000   0.82511972
  0.61550000   0.82512036
  0.61550000   0.82512101
  0.61550000   0.82512165
  0.61550000   0.82512229
  0.61550000   0.82512293
  0.61550000   0.82512356
  0.61550000   0.82512420
  0.61600000   0.82510364
  0.61600000   0.82510432
  0.61600000   0.82510499
  0.61600000   0.82510566
  0.61600000   0.82510634
  0.61600000   0.82510701
  0.61600000   0.82510768
  0.61600000   0.82510835
  0.61600000   0.82510901
  0.61600000   0.82510968
  0.61600000   0.82511035
  0.61600000   0.82511101
  0.61600000   0.82511167
  0.61600000   0.82511234
  0.61600000   0.82511300
  0.61600000   0.82511366
  0.61600000   0.82511431
  0.61600000   0.82511497
  0.61600000   0.82511563
  0.61600000   0.82511628
  0.61600000   0.82511694
  0.61600000   0.82511759
  0.61600000   0.82511824
  0.61600000   0.82511890
  0.61600000   0.82511955
  0.61600000   0.82512019
  0.61600000   0.82512084
  0.61600000   0.82512149
  0.61600000   0.82512214
  0.61600000   0.82512278
  0.61600000   0.82512342
  0.61600000   0.82512407
  0.61600000   0.82512471
  0.61600000   0.82512535
  0.61600000   0.82512599
  0.61600000   0.82512663
  0.61600000   0.82512726
  0.61600000   0.82512790
  0.61600000   0.82512854
  0.61600000   0.82512917
  0.61650000   0.82510869
  0.61650000   0.82510937
  0.61650000   0.82511004
  0.61650000   0.82511071
  0.61650000   0.82511138
  0.61650000   0.82511205
  0.61650000   0.82511271
  0.61650000   0.82511338
  0.61650000   0.82511404
  0.61650000   0.82511471
  0.61650000   0.82511537
  0.61650000   0.82511603
  0.61650000   0.82511669
  0.61650000   0.82511735
  0.61650000   0.82511801
  0.61650000   0.82511867
  0.61650000   0.82511932
  0.61650000   0.82511998
  0.61650000   0.82512063
  0.61650000   0.82512128
  0.61650000   0.82512194
  0.61650000   0.82512259
  0.61650000   0.82512324
  0.61650000   0.82512389
  0.61650000   0.82512453
  0.61650000   0.82512518
  0.61650000   0.82512582
  0.61650000   0.82512647
  0.61650000   0.82512711
  0.61650000   0.82512775
  0.61650000   0.82512840
  0.61650000   0.82512904
  0.61650000   0.82512968
  0.61650000   0.82513031
  0.61650000   0.82513095
  0.61650000   0.82513159
  0.61650000   0.82513222
  0.61650000   0.82513286
  0.61650000   0.82513349
  0.61650000   0.82513412
  0.61700000   0.82511372
  0.61700000   0.82511439
  0.61700000   0.82511506
  0.61700000   0.82511573
  0.61700000   0.82511640
  0.61700000   0.82511706
  0.61700000   0.82511773
  0.61700000   0.82511839
  0.61700000   0.82511905
  0.61700000   0.82511971
  0.61700000   0.82512037
  0.61700000   0.82512103
  0.61700000   0.82512169
  0.61700000   0.82512235
  0.61700000   0.82512300
  0.61700000   0.82512366
  0.61700000   0.82512431
  0.61700000   0.82512496
  0.61700000   0.82512561
  0.61700000   0.82512626
  0.61700000   0.82512691
  0.61700000   0.82512756
  0.61700000   0.82512821
  0.61700000   0.82512885
  0.61700000   0.82512950
  0.61700000   0.82513014
  0.61700000   0.82513078
  0.61700000   0.82513143
  0.61700000   0.82513207
  0.61700000   0.82513271
  0.61700000   0.82513335
  0.61700000   0.82513398
  0.61700000   0.82513462
  0.61700000   0.82513526
  0.61700000   0.82513589
  0.61700000   0.82513652
  0.61700000   0.82513716
  0.61700000   0.82513779
  0.61700000   0.82513842
  0.61700000   0.82513905
  0.61750000   0.82511873
  0.61750000   0.82511940
  0.61750000   0.82512006
  0.61750000   0.82512073
  0.61750000   0.82512139
  0.61750000   0.82512205
  0.61750000   0.82512272
  0.61750000   0.82512338
  0.61750000   0.82512404
  0.61750000   0.82512469
  0.61750000   0.82512535
  0.61750000   0.82512601
  0.61750000   0.82512666
  0.61750000   0.82512732
  0.61750000   0.82512797
  0.61750000   0.82512862
  0.61750000   0.82512927
  0.61750000   0.82512992
  0.61750000   0.82513057
  0.61750000   0.82513122
  0.61750000   0.82513187
  0.61750000   0.82513251
  0.61750000   0.82513316
  0.61750000   0.82513380
  0.61750000   0.82513444
  0.61750000   0.82513508
  0.61750000   0.82513572
  0.61750000   0.82513636
  0.61750000   0.82513700
  0.61750000   0.82513764
  0.61750000   0.82513827
  0.61750000   0.82513891
  0.61750000   0.82513954
  0.61750000   0.82514018
  0.61750000   0.82514081
  0.61750000   0.82514144
  0.61750000   0.82514207
  0.61750000   0.82514270
  0.61750000   0.82514333
  0.61750000   0.82514395
  0.61800000   0.82512371
  0.61800000   0.82512438
  0.61800000   0.82512504
  0.61800000   0.82512570
  0.61800000   0.82512636
  0.61800000   0.82512702
  0.61800000   0.82512768
  0.61800000   0.82512834
  0.61800000   0.82512900
  0.61800000   0.82512965
  0.61800000   0.82513031
  0.61800000   0.82513096
  0.61800000   0.82513162
  0.61800000   0.82513227
  0.61800000   0.82513292
  0.61800000   0.82513357
  0.61800000   0.82513422
  0.61800000   0.82513486
  0.61800000   0.82513551
  0.61800000   0.82513615
  0.61800000   0.82513680
  0.61800000   0.82513744
  0.61800000   0.82513808
  0.61800000   0.82513872
  0.61800000   0.82513936
  0.61800000   0.82514000
  0.61800000   0.82514064
  0.61800000   0.82514128
  0.61800000   0.82514191
  0.61800000   0.82514255
  0.61800000   0.82514318
  0.61800000   0.82514381
  0.61800000   0.82514444
  0.61800000   0.82514507
  0.61800000   0.82514570
  0.61800000   0.82514633
  0.61800000   0.82514696
  0.61800000   0.82514759
  0.61800000   0.82514821
  0.61800000   0.82514884
  0.61850000   0.82512868
  0.61850000   0.82512934
  0.61850000   0.82513000
  0.61850000   0.82513066
  0.61850000   0.82513132
  0.61850000   0.82513197
  0.61850000   0.82513263
  0.61850000   0.82513329
  0.61850000   0.82513394
  0.61850000   0.82513459
  0.61850000   0.82513525
  0.61850000   0.82513590
  0.61850000   0.82513655
  0.61850000   0.82513720
  0.61850000   0.82513784
  0.61850000   0.82513849
  0.61850000   0.82513914
  0.61850000   0.82513978
  0.61850000   0.82514042
  0.61850000   0.82514107
  0.61850000   0.82514171
  0.61850000   0.82514235
  0.61850000   0.82514299
  0.61850000   0.82514363
  0.61850000   0.82514426
  0.61850000   0.82514490
  0.61850000   0.82514553
  0.61850000   0.82514617
  0.61850000   0.82514680
  0.61850000   0.82514743
  0.61850000   0.82514806
  0.61850000   0.82514869
  0.61850000   0.82514932
  0.61850000   0.82514995
  0.61850000   0.82515058
  0.61850000   0.82515120
  0.61850000   0.82515183
  0.61850000   0.82515245
  0.61850000   0.82515307
  0.61850000   0.82515370
  0.61900000   0.82513362
  0.61900000   0.82513427
  0.61900000   0.82513493
  0.61900000   0.82513559
  0.61900000   0.82513625
  0.61900000   0.82513690
  0.61900000   0.82513756
  0.61900000   0.82513821
  0.61900000   0.82513886
  0.61900000   0.82513951
  0.61900000   0.82514016
  0.61900000   0.82514081
  0.61900000   0.82514146
  0.61900000   0.82514210
  0.61900000   0.82514275
  0.61900000   0.82514339
  0.61900000   0.82514403
  0.61900000   0.82514468
  0.61900000   0.82514532
  0.61900000   0.82514596
  0.61900000   0.82514660
  0.61900000   0.82514723
  0.61900000   0.82514787
  0.61900000   0.82514851
  0.61900000   0.82514914
  0.61900000   0.82514977
  0.61900000   0.82515041
  0.61900000   0.82515104
  0.61900000   0.82515167
  0.61900000   0.82515230
  0.61900000   0.82515293
  0.61900000   0.82515355
  0.61900000   0.82515418
  0.61900000   0.82515481
  0.61900000   0.82515543
  0.61900000   0.82515605
  0.61900000   0.82515668
  0.61900000   0.82515730
  0.61900000   0.82515792
  0.61900000   0.82515854
  0.61950000   0.82513853
  0.61950000   0.82513919
  0.61950000   0.82513985
  0.61950000   0.82514050
  0.61950000   0.82514115
  0.61950000   0.82514181
  0.61950000   0.82514246
  0.61950000   0.82514311
  0.61950000   0.82514376
  0.61950000   0.82514441
  0.61950000   0.82514505
  0.61950000   0.82514570
  0.61950000   0.82514634
  0.61950000   0.82514699
  0.61950000   0.82514763
  0.61950000   0.82514827
  0.61950000   0.82514891
  0.61950000   0.82514955
  0.61950000   0.82515019
  0.61950000   0.82515083
  0.61950000   0.82515146
  0.61950000   0.82515210
  0.61950000   0.82515273
  0.61950000   0.82515337
  0.61950000   0.82515400
  0.61950000   0.82515463
  0.61950000   0.82515526
  0.61950000   0.82515589
  0.61950000   0.82515652
  0.61950000   0.82515714
  0.61950000   0.82515777
  0.61950000   0.82515839
  0.61950000   0.82515902
  0.61950000   0.82515964
  0.61950000   0.82516026
  0.61950000   0.82516088
  0.61950000   0.82516150
  0.61950000   0.82516212
  0.61950000   0.82516274
  0.61950000   0.82516336
  0.62000000   0.82514343
  0.62000000   0.82514409
  0.62000000   0.82514474
  0.62000000   0.82514539
  0.62000000   0.82514604
  0.62000000   0.82514669
  0.62000000   0.82514734
  0.62000000   0.82514799
  0.62000000   0.82514863
  0.62000000   0.82514928
  0.62000000   0.82514992
  0.62000000   0.82515057
  0.62000000   0.82515121
  0.62000000   0.82515185
  0.62000000   0.82515249
  0.62000000   0.82515313
  0.62000000   0.82515377
  0.62000000   0.82515440
  0.62000000   0.82515504
  0.62000000   0.82515567
  0.62000000   0.82515631
  0.62000000   0.82515694
  0.62000000   0.82515757
  0.62000000   0.82515820
  0.62000000   0.82515883
  0.62000000   0.82515946
  0.62000000   0.82516009
  0.62000000   0.82516071
  0.62000000   0.82516134
  0.62000000   0.82516196
  0.62000000   0.82516259
  0.62000000   0.82516321
  0.62000000   0.82516383
  0.62000000   0.82516445
  0.62000000   0.82516507
  0.62000000   0.82516569
  0.62000000   0.82516631
  0.62000000   0.82516692
  0.62000000   0.82516754
  0.62000000   0.82516815
  0.62050000   0.82514831
  0.62050000   0.82514896
  0.62050000   0.82514961
  0.62050000   0.82515026
  0.62050000   0.82515091
  0.62050000   0.82515155
  0.62050000   0.82515220
  0.62050000   0.82515284
  0.62050000   0.82515349
  0.62050000   0.82515413
  0.62050000   0.82515477
  0.62050000   0.82515541
  0.62050000   0.82515605
  0.62050000   0.82515669
  0.62050000   0.82515733
  0.62050000   0.82515797
  0.62050000   0.82515860
  0.62050000   0.82515923
  0.62050000   0.82515987
  0.62050000   0.82516050
  0.62050000   0.82516113
  0.62050000   0.82516176
  0.62050000   0.82516239
  0.62050000   0.82516302
  0.62050000   0.82516365
  0.62050000   0.82516427
  0.62050000   0.82516490
  0.62050000   0.82516552
  0.62050000   0.82516614
  0.62050000   0.82516677
  0.62050000   0.82516739
  0.62050000   0.82516801
  0.62050000   0.82516862
  0.62050000   0.82516924
  0.62050000   0.82516986
  0.62050000   0.82517048
  0.62050000   0.82517109
  0.62050000   0.82517170
  0.62050000   0.82517232
  0.62050000   0.82517293
  0.62100000   0.82515316
  0.62100000   0.82515381
  0.62100000   0.82515446
  0.62100000   0.82515510
  0.62100000   0.82515575
  0.62100000   0.82515639
  0.62100000   0.82515704
  0.62100000   0.82515768
  0.62100000   0.82515832
  0.62100000   0.82515896
  0.62100000   0.82515960
  0.62100000   0.82516024
  0.62100000   0.82516088
  0.62100000   0.82516151
  0.62100000   0.82516215
  0.62100000   0.82516278
  0.62100000   0.82516341
  0.62100000   0.82516404
  0.62100000   0.82516468
  0.62100000   0.82516530
  0.62100000   0.82516593
  0.62100000   0.82516656
  0.62100000   0.82516719
  0.62100000   0.82516781
  0.62100000   0.82516844
  0.62100000   0.82516906
  0.62100000   0.82516968
  0.62100000   0.82517030
  0.62100000   0.82517093
  0.62100000   0.82517154
  0.62100000   0.82517216
  0.62100000   0.82517278
  0.62100000   0.82517340
  0.62100000   0.82517401
  0.62100000   0.82517463
  0.62100000   0.82517524
  0.62100000   0.82517585
  0.62100000   0.82517646
  0.62100000   0.82517707
  0.62100000   0.82517768
  0.62150000   0.82515799
  0.62150000   0.82515864
  0.62150000   0.82515928
  0.62150000   0.82515993
  0.62150000   0.82516057
  0.62150000   0.82516121
  0.62150000   0.82516185
  0.62150000   0.82516249
  0.62150000   0.82516313
  0.62150000   0.82516377
  0.62150000   0.82516441
  0.62150000   0.82516504
  0.62150000   0.82516568
  0.62150000   0.82516631
  0.62150000   0.82516694
  0.62150000   0.82516757
  0.62150000   0.82516820
  0.62150000   0.82516883
  0.62150000   0.82516946
  0.62150000   0.82517009
  0.62150000   0.82517071
  0.62150000   0.82517134
  0.62150000   0.82517196
  0.62150000   0.82517259
  0.62150000   0.82517321
  0.62150000   0.82517383
  0.62150000   0.82517445
  0.62150000   0.82517507
  0.62150000   0.82517569
  0.62150000   0.82517630
  0.62150000   0.82517692
  0.62150000   0.82517753
  0.62150000   0.82517815
  0.62150000   0.82517876
  0.62150000   0.82517937
  0.62150000   0.82517998
  0.62150000   0.82518059
  0.62150000   0.82518120
  0.62150000   0.82518181
  0.62150000   0.82518242
  0.62200000   0.82516280
  0.62200000   0.82516345
  0.62200000   0.82516409
  0.62200000   0.82516473
  0.62200000   0.82516537
  0.62200000   0.82516601
  0.62200000   0.82516665
  0.62200000   0.82516729
  0.62200000   0.82516792
  0.62200000   0.82516856
  0.62200000   0.82516919
  0.62200000   0.82516983
  0.62200000   0.82517046
  0.62200000   0.82517109
  0.62200000   0.82517172
  0.62200000   0.82517235
  0.62200000   0.82517297
  0.62200000   0.82517360
  0.62200000   0.82517423
  0.62200000   0.82517485
  0.62200000   0.82517547
  0.62200000   0.82517610
  0.62200000   0.82517672
  0.62200000   0.82517734
  0.62200000   0.82517796
  0.62200000   0.82517858
  0.62200000   0.82517919
  0.62200000   0.82517981
  0.62200000   0.82518043
  0.62200000   0.82518104
  0.62200000   0.82518165
  0.62200000   0.82518227
  0.62200000   0.82518288
  0.62200000   0.82518349
  0.62200000   0.82518410
  0.62200000   0.82518471
  0.62200000   0.82518531
  0.62200000   0.82518592
  0.62200000   0.82518653
  0.62200000   0.82518713
  0.62250000   0.82516759
  0.62250000   0.82516823
  0.62250000   0.82516887
  0.62250000   0.82516951
  0.62250000   0.82517015
  0.62250000   0.82517079
  0.62250000   0.82517142
  0.62250000   0.82517206
  0.62250000   0.82517269
  0.62250000   0.82517332
  0.62250000   0.82517396
  0.62250000   0.82517459
  0.62250000   0.82517522
  0.62250000   0.82517584
  0.62250000   0.82517647
  0.62250000   0.82517710
  0.62250000   0.82517772
  0.62250000   0.82517835
  0.62250000   0.82517897
  0.62250000   0.82517959
  0.62250000   0.82518021
  0.62250000   0.82518083
  0.62250000   0.82518145
  0.62250000   0.82518207
  0.62250000   0.82518269
  0.62250000   0.82518330
  0.62250000   0.82518392
  0.62250000   0.82518453
  0.62250000   0.82518514
  0.62250000   0.82518576
  0.62250000   0.82518637
  0.62250000   0.82518698
  0.62250000   0.82518759
  0.62250000   0.82518819
  0.62250000   0.82518880
  0.62250000   0.82518941
  0.62250000   0.82519001
  0.62250000   0.82519062
  0.62250000   0.82519122
  0.62250000   0.82519182
  0.62300000   0.82517236
  0.62300000   0.82517300
  0.62300000   0.82517364
  0.62300000   0.82517427
  0.62300000   0.82517491
  0.62300000   0.82517554
  0.62300000   0.82517618
  0.62300000   0.82517681
  0.62300000   0.82517744
  0.62300000   0.82517807
  0.62300000   0.82517870
  0.62300000   0.82517933
  0.62300000   0.82517995
  0.62300000   0.82518058
  0.62300000   0.82518120
  0.62300000   0.82518183
  0.62300000   0.82518245
  0.62300000   0.82518307
  0.62300000   0.82518369
  0.62300000   0.82518431
  0.62300000   0.82518493
  0.62300000   0.82518555
  0.62300000   0.82518616
  0.62300000   0.82518678
  0.62300000   0.82518739
  0.62300000   0.82518801
  0.62300000   0.82518862
  0.62300000   0.82518923
  0.62300000   0.82518984
  0.62300000   0.82519045
  0.62300000   0.82519106
  0.62300000   0.82519167
  0.62300000   0.82519227
  0.62300000   0.82519288
  0.62300000   0.82519348
  0.62300000   0.82519409
  0.62300000   0.82519469
  0.62300000   0.82519529
  0.62300000   0.82519589
  0.62300000   0.82519649
  0.62350000   0.82517711
  0.62350000   0.82517775
  0.62350000   0.82517838
  0.62350000   0.82517901
  0.62350000   0.82517965
  0.62350000   0.82518028
  0.62350000   0.82518091
  0.62350000   0.82518154
  0.62350000   0.82518217
  0.62350000   0.82518279
  0.62350000   0.82518342
  0.62350000   0.82518405
  0.62350000   0.82518467
  0.62350000   0.82518529
  0.62350000   0.82518592
  0.62350000   0.82518654
  0.62350000   0.82518716
  0.62350000   0.82518778
  0.62350000   0.82518839
  0.62350000   0.82518901
  0.62350000   0.82518963
  0.62350000   0.82519024
  0.62350000   0.82519086
  0.62350000   0.82519147
  0.62350000   0.82519208
  0.62350000   0.82519269
  0.62350000   0.82519330
  0.62350000   0.82519391
  0.62350000   0.82519452
  0.62350000   0.82519513
  0.62350000   0.82519573
  0.62350000   0.82519634
  0.62350000   0.82519694
  0.62350000   0.82519754
  0.62350000   0.82519815
  0.62350000   0.82519875
  0.62350000   0.82519935
  0.62350000   0.82519995
  0.62350000   0.82520055
  0.62350000   0.82520114
  0.62400000   0.82518184
  0.62400000   0.82518247
  0.62400000   0.82518310
  0.62400000   0.82518373
  0.62400000   0.82518436
  0.62400000   0.82518499
  0.62400000   0.82518562
  0.62400000   0.82518625
  0.62400000   0.82518687
  0.62400000   0.82518750
  0.62400000   0.82518812
  0.62400000   0.82518875
  0.62400000   0.82518937
  0.62400000   0.82518999
  0.62400000   0.82519061
  0.62400000   0.82519123
  0.62400000   0.82519184
  0.62400000   0.82519246
  0.62400000   0.82519308
  0.62400000   0.82519369
  0.62400000   0.82519430
  0.62400000   0.82519492
  0.62400000   0.82519553
  0.62400000   0.82519614
  0.62400000   0.82519675
  0.62400000   0.82519736
  0.62400000   0.82519796
  0.62400000   0.82519857
  0.62400000   0.82519918
  0.62400000   0.82519978
  0.62400000   0.82520038
  0.62400000   0.82520099
  0.62400000   0.82520159
  0.62400000   0.82520219
  0.62400000   0.82520279
  0.62400000   0.82520339
  0.62400000   0.82520398
  0.62400000   0.82520458
  0.62400000   0.82520518
  0.62400000   0.82520577
  0.62450000   0.82518654
  0.62450000   0.82518717
  0.62450000   0.82518780
  0.62450000   0.82518843
  0.62450000   0.82518906
  0.62450000   0.82518969
  0.62450000   0.82519031
  0.62450000   0.82519094
  0.62450000   0.82519156
  0.62450000   0.82519218
  0.62450000   0.82519280
  0.62450000   0.82519342
  0.62450000   0.82519404
  0.62450000   0.82519466
  0.62450000   0.82519528
  0.62450000   0.82519589
  0.62450000   0.82519651
  0.62450000   0.82519712
  0.62450000   0.82519774
  0.62450000   0.82519835
  0.62450000   0.82519896
  0.62450000   0.82519957
  0.62450000   0.82520018
  0.62450000   0.82520079
  0.62450000   0.82520139
  0.62450000   0.82520200
  0.62450000   0.82520260
  0.62450000   0.82520321
  0.62450000   0.82520381
  0.62450000   0.82520441
  0.62450000   0.82520501
  0.62450000   0.82520561
  0.62450000   0.82520621
  0.62450000   0.82520681
  0.62450000   0.82520741
  0.62450000   0.82520801
  0.62450000   0.82520860
  0.62450000   0.82520919
  0.62450000   0.82520979
  0.62450000   0.82521038
  0.62500000   0.82519123
  0.62500000   0.82519186
  0.62500000   0.82519248
  0.62500000   0.82519311
  0.62500000   0.82519373
  0.62500000   0.82519436
  0.62500000   0.82519498
  0.62500000   0.82519560
  0.62500000   0.82519622
  0.62500000   0.82519684
  0.62500000   0.82519746
  0.62500000   0.82519808
  0.62500000   0.82519870
  0.62500000   0.82519931
  0.62500000   0.82519993
  0.62500000   0.82520054
  0.62500000   0.82520115
  0.62500000   0.82520176
  0.62500000   0.82520238
  0.62500000   0.82520299
  0.62500000   0.82520359
  0.62500000   0.82520420
  0.62500000   0.82520481
  0.62500000   0.82520541
  0.62500000   0.82520602
  0.62500000   0.82520662
  0.62500000   0.82520722
  0.62500000   0.82520783
  0.62500000   0.82520843
  0.62500000   0.82520903
  0.62500000   0.82520962
  0.62500000   0.82521022
  0.62500000   0.82521082
  0.62500000   0.82521141
  0.62500000   0.82521201
  0.62500000   0.82521260
  0.62500000   0.82521320
  0.62500000   0.82521379
  0.62500000   0.82521438
  0.62500000   0.82521497
  0.62550000   0.82519589
  0.62550000   0.82519652
  0.62550000   0.82519714
  0.62550000   0.82519776
  0.62550000   0.82519839
  0.62550000   0.82519901
  0.62550000   0.82519963
  0.62550000   0.82520025
  0.62550000   0.82520087
  0.62550000   0.82520148
  0.62550000   0.82520210
  0.62550000   0.82520272
  0.62550000   0.82520333
  0.62550000   0.82520394
  0.62550000   0.82520456
  0.62550000   0.82520517
  0.62550000   0.82520578
  0.62550000   0.82520639
  0.62550000   0.82520699
  0.62550000   0.82520760
  0.62550000   0.82520821
  0.62550000   0.82520881
  0.62550000   0.82520942
  0.62550000   0.82521002
  0.62550000   0.82521062
  0.62550000   0.82521122
  0.62550000   0.82521182
  0.62550000   0.82521242
  0.62550000   0.82521302
  0.62550000   0.82521362
  0.62550000   0.82521421
  0.62550000   0.82521481
  0.62550000   0.82521540
  0.62550000   0.82521600
  0.62550000   0.82521659
  0.62550000   0.82521718
  0.62550000   0.82521777
  0.62550000   0.82521836
  0.62550000   0.82521895
  0.62550000   0.82521954
  0.62600000   0.82520053
  0.62600000   0.82520116
  0.62600000   0.82520178
  0.62600000   0.82520240
  0.62600000   0.82520302
  0.62600000   0.82520364
  0.62600000   0.82520426
  0.62600000   0.82520487
  0.62600000   0.82520549
  0.62600000   0.82520611
  0.62600000   0.82520672
  0.62600000   0.82520733
  0.62600000   0.82520794
  0.62600000   0.82520855
  0.62600000   0.82520916
  0.62600000   0.82520977
  0.62600000   0.82521038
  0.62600000   0.82521099
  0.62600000   0.82521159
  0.62600000   0.82521220
  0.62600000   0.82521280
  0.62600000   0.82521340
  0.62600000   0.82521401
  0.62600000   0.82521461
  0.62600000   0.82521521
  0.62600000   0.82521581
  0.62600000   0.82521640
  0.62600000   0.82521700
  0.62600000   0.82521760
  0.62600000   0.82521819
  0.62600000   0.82521878
  0.62600000   0.82521938
  0.62600000   0.82521997
  0.62600000   0.82522056
  0.62600000   0.82522115
  0.62600000   0.82522174
  0.62600000   0.82522233
  0.62600000   0.82522291
  0.62600000   0.82522350
  0.62600000   0.82522408
  0.62650000   0.82520516
  0.62650000   0.82520578
  0.62650000   0.82520640
  0.62650000   0.82520702
  0.62650000   0.82520763
  0.62650000   0.82520825
  0.62650000   0.82520887
  0.62650000   0.82520948
  0.62650000   0.82521009
  0.62650000   0.82521071
  0.62650000   0.82521132
  0.62650000   0.82521193
  0.62650000   0.82521254
  0.62650000   0.82521315
  0.62650000   0.82521375
  0.62650000   0.82521436
  0.62650000   0.82521496
  0.62650000   0.82521557
  0.62650000   0.82521617
  0.62650000   0.82521677
  0.62650000   0.82521737
  0.62650000   0.82521798
  0.62650000   0.82521857
  0.62650000   0.82521917
  0.62650000   0.82521977
  0.62650000   0.82522037
  0.62650000   0.82522096
  0.62650000   0.82522156
  0.62650000   0.82522215
  0.62650000   0.82522274
  0.62650000   0.82522333
  0.62650000   0.82522392
  0.62650000   0.82522451
  0.62650000   0.82522510
  0.62650000   0.82522569
  0.62650000   0.82522628
  0.62650000   0.82522686
  0.62650000   0.82522745
  0.62650000   0.82522803
  0.62650000   0.82522861
  0.62700000   0.82520976
  0.62700000   0.82521038
  0.62700000   0.82521100
  0.62700000   0.82521161
  0.62700000   0.82521223
  0.62700000   0.82521284
  0.62700000   0.82521345
  0.62700000   0.82521407
  0.62700000   0.82521468
  0.62700000   0.82521529
  0.62700000   0.82521589
  0.62700000   0.82521650
  0.62700000   0.82521711
  0.62700000   0.82521772
  0.62700000   0.82521832
  0.62700000   0.82521892
  0.62700000   0.82521953
  0.62700000   0.82522013
  0.62700000   0.82522073
  0.62700000   0.82522133
  0.62700000   0.82522193
  0.62700000   0.82522253
  0.62700000   0.82522312
  0.62700000   0.82522372
  0.62700000   0.82522431
  0.62700000   0.82522491
  0.62700000   0.82522550
  0.62700000   0.82522609
  0.62700000   0.82522668
  0.62700000   0.82522727
  0.62700000   0.82522786
  0.62700000   0.82522845
  0.62700000   0.82522904
  0.62700000   0.82522962
  0.62700000   0.82523021
  0.62700000   0.82523079
  0.62700000   0.82523138
  0.62700000   0.82523196
  0.62700000   0.82523254
  0.62700000   0.82523312
  0.62750000   0.82521434
  0.62750000   0.82521496
  0.62750000   0.82521557
  0.62750000   0.82521619
  0.62750000   0.82521680
  0.62750000   0.82521741
  0.62750000   0.82521802
  0.62750000   0.82521863
  0.62750000   0.82521924
  0.62750000   0.82521985
  0.62750000   0.82522045
  0.62750000   0.82522106
  0.62750000   0.82522166
  0.62750000   0.82522227
  0.62750000   0.82522287
  0.62750000   0.82522347
  0.62750000   0.82522407
  0.62750000   0.82522467
  0.62750000   0.82522527
  0.62750000   0.82522586
  0.62750000   0.82522646
  0.62750000   0.82522706
  0.62750000   0.82522765
  0.62750000   0.82522824
  0.62750000   0.82522884
  0.62750000   0.82522943
  0.62750000   0.82523002
  0.62750000   0.82523061
  0.62750000   0.82523120
  0.62750000   0.82523178
  0.62750000   0.82523237
  0.62750000   0.82523296
  0.62750000   0.82523354
  0.62750000   0.82523412
  0.62750000   0.82523471
  0.62750000   0.82523529
  0.62750000   0.82523587
  0.62750000   0.82523645
  0.62750000   0.82523703
  0.62750000   0.82523761
  0.62800000   0.82521890
  0.62800000   0.82521952
  0.62800000   0.82522013
  0.62800000   0.82522074
  0.62800000   0.82522135
  0.62800000   0.82522196
  0.62800000   0.82522257
  0.62800000   0.82522317
  0.62800000   0.82522378
  0.62800000   0.82522439
  0.62800000   0.82522499
  0.62800000   0.82522559
  0.62800000   0.82522619
  0.62800000   0.82522679
  0.62800000   0.82522739
  0.62800000   0.82522799
  0.62800000   0.82522859
  0.62800000   0.82522919
  0.62800000   0.82522978
  0.62800000   0.82523038
  0.62800000   0.82523097
  0.62800000   0.82523157
  0.62800000   0.82523216
  0.62800000   0.82523275
  0.62800000   0.82523334
  0.62800000   0.82523393
  0.62800000   0.82523452
  0.62800000   0.82523510
  0.62800000   0.82523569
  0.62800000   0.82523627
  0.62800000   0.82523686
  0.62800000   0.82523744
  0.62800000   0.82523802
  0.62800000   0.82523861
  0.62800000   0.82523919
  0.62800000   0.82523977
  0.62800000   0.82524034
  0.62800000   0.82524092
  0.62800000   0.82524150
  0.62800000   0.82524207
  0.62850000   0.82522345
  0.62850000   0.82522406
  0.62850000   0.82522467
  0.62850000   0.82522527
  0.62850000   0.82522588
  0.62850000   0.82522649
  0.62850000   0.82522709
  0.62850000   0.82522770
  0.62850000   0.82522830
  0.62850000   0.82522890
  0.62850000   0.82522951
  0.62850000   0.82523011
  0.62850000   0.82523071
  0.62850000   0.82523130
  0.62850000   0.82523190
  0.62850000   0.82523250
  0.62850000   0.82523309
  0.62850000   0.82523369
  0.62850000   0.82523428
  0.62850000   0.82523487
  0.62850000   0.82523547
  0.62850000   0.82523606
  0.62850000   0.82523665
  0.62850000   0.82523723
  0.62850000   0.82523782
  0.62850000   0.82523841
  0.62850000   0.82523899
  0.62850000   0.82523958
  0.62850000   0.82524016
  0.62850000   0.82524075
  0.62850000   0.82524133
  0.62850000   0.82524191
  0.62850000   0.82524249
  0.62850000   0.82524307
  0.62850000   0.82524365
  0.62850000   0.82524422
  0.62850000   0.82524480
  0.62850000   0.82524537
  0.62850000   0.82524595
  0.62850000   0.82524652
  0.62900000   0.82522797
  0.62900000   0.82522857
  0.62900000   0.82522918
  0.62900000   0.82522979
  0.62900000   0.82523039
  0.62900000   0.82523100
  0.62900000   0.82523160
  0.62900000   0.82523220
  0.62900000   0.82523280
  0.62900000   0.82523340
  0.62900000   0.82523400
  0.62900000   0.82523460
  0.62900000   0.82523520
  0.62900000   0.82523579
  0.62900000   0.82523639
  0.62900000   0.82523698
  0.62900000   0.82523758
  0.62900000   0.82523817
  0.62900000   0.82523876
  0.62900000   0.82523935
  0.62900000   0.82523994
  0.62900000   0.82524053
  0.62900000   0.82524111
  0.62900000   0.82524170
  0.62900000   0.82524229
  0.62900000   0.82524287
  0.62900000   0.82524345
  0.62900000   0.82524404
  0.62900000   0.82524462
  0.62900000   0.82524520
  0.62900000   0.82524578
  0.62900000   0.82524635
  0.62900000   0.82524693
  0.62900000   0.82524751
  0.62900000   0.82524808
  0.62900000   0.82524866
  0.62900000   0.82524923
  0.62900000   0.82524981
  0.62900000   0.82525038
  0.62900000   0.82525095
  0.62950000   0.82523247
  0.62950000   0.82523307
  0.62950000   0.82523368
  0.62950000   0.82523428
  0.62950000   0.82523488
  0.62950000   0.82523549
  0.62950000   0.82523609
  0.62950000   0.82523669
  0.62950000   0.82523729
  0.62950000   0.82523788
  0.62950000   0.82523848
  0.62950000   0.82523908
  0.62950000   0.82523967
  0.62950000   0.82524026
  0.62950000   0.82524086
  0.62950000   0.82524145
  0.62950000   0.82524204
  0.62950000   0.82524263
  0.62950000   0.82524322
  0.62950000   0.82524380
  0.62950000   0.82524439
  0.62950000   0.82524498
  0.62950000   0.82524556
  0.62950000   0.82524615
  0.62950000   0.82524673
  0.62950000   0.82524731
  0.62950000   0.82524789
  0.62950000   0.82524847
  0.62950000   0.82524905
  0.62950000   0.82524963
  0.62950000   0.82525021
  0.62950000   0.82525078
  0.62950000   0.82525136
  0.62950000   0.82525193
  0.62950000   0.82525250
  0.62950000   0.82525308
  0.62950000   0.82525365
  0.62950000   0.82525422
  0.62950000   0.82525479
  0.62950000   0.82525536
  0.63000000   0.82523695
  0.63000000   0.82523755
  0.63000000   0.82523815
  0.63000000   0.82523876
  0.63000000   0.82523936
  0.63000000   0.82523996
  0.63000000   0.82524055
  0.63000000   0.82524115
  0.63000000   0.82524175
  0.63000000   0.82524234
  0.63000000   0.82524294
  0.63000000   0.82524353
  0.63000000   0.82524412
  0.63000000   0.82524471
  0.63000000   0.82524530
  0.63000000   0.82524589
  0.63000000   0.82524648
  0.63000000   0.82524707
  0.63000000   0.82524765
  0.63000000   0.82524824
  0.63000000   0.82524882
  0.63000000   0.82524941
  0.63000000   0.82524999
  0.63000000   0.82525057
  0.63000000   0.82525115
  0.63000000   0.82525173
  0.63000000   0.82525231
  0.63000000   0.82525289
  0.63000000   0.82525346
  0.63000000   0.82525404
  0.63000000   0.82525461
  0.63000000   0.82525519
  0.63000000   0.82525576
  0.63000000   0.82525633
  0.63000000   0.82525690
  0.63000000   0.82525747
  0.63000000   0.82525804
  0.63000000   0.82525861
  0.63000000   0.82525918
  0.63000000   0.82525975
  0.63050000   0.82524141
  0.63050000   0.82524201
  0.63050000   0.82524261
  0.63050000   0.82524321
  0.63050000   0.82524381
  0.63050000   0.82524440
  0.63050000   0.82524500
  0.63050000   0.82524560
  0.63050000   0.82524619
  0.63050000   0.82524678
  0.63050000   0.82524737
  0.63050000   0.82524796
  0.63050000   0.82524855
  0.63050000   0.82524914
  0.63050000   0.82524973
  0.63050000   0.82525032
  0.63050000   0.82525090
  0.63050000   0.82525149
  0.63050000   0.82525207
  0.63050000   0.82525266
  0.63050000   0.82525324
  0.63050000   0.82525382
  0.63050000   0.82525440
  0.63050000   0.82525498
  0.63050000   0.82525556
  0.63050000   0.82525613
  0.63050000   0.82525671
  0.63050000   0.82525728
  0.63050000   0.82525786
  0.63050000   0.82525843
  0.63050000   0.82525900
  0.63050000   0.82525958
  0.63050000   0.82526015
  0.63050000   0.82526072
  0.63050000   0.82526128
  0.63050000   0.82526185
  0.63050000   0.82526242
  0.63050000   0.82526299
  0.63050000   0.82526355
  0.63050000   0.82526411
  0.63100000   0.82524585
  0.63100000   0.82524645
  0.63100000   0.82524705
  0.63100000   0.82524764
  0.63100000   0.82524824
  0.63100000   0.82524883
  0.63100000   0.82524943
  0.63100000   0.82525002
  0.63100000   0.82525061
  0.63100000   0.82525120
  0.63100000   0.82525179
  0.63100000   0.82525238
  0.63100000   0.82525297
  0.63100000   0.82525355
  0.63100000   0.82525414
  0.63100000   0.82525472
  0.63100000   0.82525531
  0.63100000   0.82525589
  0.63100000   0.82525647
  0.63100000   0.82525705
  0.63100000   0.82525763
  0.63100000   0.82525821
  0.63100000   0.82525879
  0.63100000   0.82525936
  0.63100000   0.82525994
  0.63100000   0.82526051
  0.63100000   0.82526109
  0.63100000   0.82526166
  0.63100000   0.82526223
  0.63100000   0.82526280
  0.63100000   0.82526337
  0.63100000   0.82526394
  0.63100000   0.82526451
  0.63100000   0.82526508
  0.63100000   0.82526565
  0.63100000   0.82526621
  0.63100000   0.82526678
  0.63100000   0.82526734
  0.63100000   0.82526790
  0.63100000   0.82526846
  0.63150000   0.82525027
  0.63150000   0.82525087
  0.63150000   0.82525147
  0.63150000   0.82525206
  0.63150000   0.82525265
  0.63150000   0.82525324
  0.63150000   0.82525384
  0.63150000   0.82525443
  0.63150000   0.82525501
  0.63150000   0.82525560
  0.63150000   0.82525619
  0.63150000   0.82525678
  0.63150000   0.82525736
  0.63150000   0.82525794
  0.63150000   0.82525853
  0.63150000   0.82525911
  0.63150000   0.82525969
  0.63150000   0.82526027
  0.63150000   0.82526085
  0.63150000   0.82526143
  0.63150000   0.82526201
  0.63150000   0.82526258
  0.63150000   0.82526316
  0.63150000   0.82526373
  0.63150000   0.82526430
  0.63150000   0.82526488
  0.63150000   0.82526545
  0.63150000   0.82526602
  0.63150000   0.82526659
  0.63150000   0.82526716
  0.63150000   0.82526773
  0.63150000   0.82526829
  0.63150000   0.82526886
  0.63150000   0.82526942
  0.63150000   0.82526999
  0.63150000   0.82527055
  0.63150000   0.82527111
  0.63150000   0.82527167
  0.63150000   0.82527223
  0.63150000   0.82527279
  0.63200000   0.82525468
  0.63200000   0.82525527
  0.63200000   0.82525586
  0.63200000   0.82525645
  0.63200000   0.82525705
  0.63200000   0.82525763
  0.63200000   0.82525822
  0.63200000   0.82525881
  0.63200000   0.82525940
  0.63200000   0.82525998
  0.63200000   0.82526057
  0.63200000   0.82526115
  0.63200000   0.82526173
  0.63200000   0.82526232
  0.63200000   0.82526290
  0.63200000   0.82526348
  0.63200000   0.82526405
  0.63200000   0.82526463
  0.63200000   0.82526521
  0.63200000   0.82526579
  0.63200000   0.82526636
  0.63200000   0.82526693
  0.63200000   0.82526751
  0.63200000   0.82526808
  0.63200000   0.82526865
  0.63200000   0.82526922
  0.63200000   0.82526979
  0.63200000   0.82527036
  0.63200000   0.82527092
  0.63200000   0.82527149
  0.63200000   0.82527206
  0.63200000   0.82527262
  0.63200000   0.82527318
  0.63200000   0.82527375
  0.63200000   0.82527431
  0.63200000   0.82527487
  0.63200000   0.82527543
  0.63200000   0.82527599
  0.63200000   0.82527655
  0.63200000   0.82527710
  0.63250000   0.82525906
  0.63250000   0.82525965
  0.63250000   0.82526024
  0.63250000   0.82526083
  0.63250000   0.82526142
  0.63250000   0.82526201
  0.63250000   0.82526259
  0.63250000   0.82526318
  0.63250000   0.82526376
  0.63250000   0.82526434
  0.63250000   0.82526493
  0.63250000   0.82526551
  0.63250000   0.82526609
  0.63250000   0.82526667
  0.63250000   0.82526725
  0.63250000   0.82526782
  0.63250000   0.82526840
  0.63250000   0.82526897
  0.63250000   0.82526955
  0.63250000   0.82527012
  0.63250000   0.82527070
  0.63250000   0.82527127
  0.63250000   0.82527184
  0.63250000   0.82527241
  0.63250000   0.82527298
  0.63250000   0.82527354
  0.63250000   0.82527411
  0.63250000   0.82527468
  0.63250000   0.82527524
  0.63250000   0.82527581
  0.63250000   0.82527637
  0.63250000   0.82527693
  0.63250000   0.82527749
  0.63250000   0.82527805
  0.63250000   0.82527861
  0.63250000   0.82527917
  0.63250000   0.82527973
  0.63250000   0.82528028
  0.63250000   0.82528084
  0.63250000   0.82528140
  0.63300000   0.82526342
  0.63300000   0.82526401
  0.63300000   0.82526460
  0.63300000   0.82526519
  0.63300000   0.82526577
  0.63300000   0.82526636
  0.63300000   0.82526694
  0.63300000   0.82526752
  0.63300000   0.82526811
  0.63300000   0.82526869
  0.63300000   0.82526927
  0.63300000   0.82526985
  0.63300000   0.82527042
  0.63300000   0.82527100
  0.63300000   0.82527158
  0.63300000   0.82527215
  0.63300000   0.82527272
  0.63300000   0.82527330
  0.63300000   0.82527387
  0.63300000   0.82527444
  0.63300000   0.82527501
  0.63300000   0.82527558
  0.63300000   0.82527615
  0.63300000   0.82527672
  0.63300000   0.82527728
  0.63300000   0.82527785
  0.63300000   0.82527841
  0.63300000   0.82527898
  0.63300000   0.82527954
  0.63300000   0.82528010
  0.63300000   0.82528066
  0.63300000   0.82528122
  0.63300000   0.82528178
  0.63300000   0.82528234
  0.63300000   0.82528290
  0.63300000   0.82528345
  0.63300000   0.82528401
  0.63300000   0.82528456
  0.63300000   0.82528512
  0.63300000   0.82528567
  0.63350000   0.82526777
  0.63350000   0.82526835
  0.63350000   0.82526894
  0.63350000   0.82526952
  0.63350000   0.82527011
  0.63350000   0.82527069
  0.63350000   0.82527127
  0.63350000   0.82527185
  0.63350000   0.82527243
  0.63350000   0.82527301
  0.63350000   0.82527359
  0.63350000   0.82527416
  0.63350000   0.82527474
  0.63350000   0.82527531
  0.63350000   0.82527589
  0.63350000   0.82527646
  0.63350000   0.82527703
  0.63350000   0.82527760
  0.63350000   0.82527817
  0.63350000   0.82527874
  0.63350000   0.82527931
  0.63350000   0.82527988
  0.63350000   0.82528044
  0.63350000   0.82528101
  0.63350000   0.82528157
  0.63350000   0.82528213
  0.63350000   0.82528270
  0.63350000   0.82528326
  0.63350000   0.82528382
  0.63350000   0.82528438
  0.63350000   0.82528494
  0.63350000   0.82528549
  0.63350000   0.82528605
  0.63350000   0.82528661
  0.63350000   0.82528716
  0.63350000   0.82528771
  0.63350000   0.82528827
  0.63350000   0.82528882
  0.63350000   0.82528937
  0.63350000   0.82528992
  0.63400000   0.82527209
  0.63400000   0.82527268
  0.63400000   0.82527326
  0.63400000   0.82527384
  0.63400000   0.82527442
  0.63400000   0.82527500
  0.63400000   0.82527558
  0.63400000   0.82527616
  0.63400000   0.82527674
  0.63400000   0.82527731
  0.63400000   0.82527789
  0.63400000   0.82527846
  0.63400000   0.82527903
  0.63400000   0.82527961
  0.63400000   0.82528018
  0.63400000   0.82528075
  0.63400000   0.82528132
  0.63400000   0.82528189
  0.63400000   0.82528245
  0.63400000   0.82528302
  0.63400000   0.82528359
  0.63400000   0.82528415
  0.63400000   0.82528471
  0.63400000   0.82528528
  0.63400000   0.82528584
  0.63400000   0.82528640
  0.63400000   0.82528696
  0.63400000   0.82528752
  0.63400000   0.82528808
  0.63400000   0.82528863
  0.63400000   0.82528919
  0.63400000   0.82528975
  0.63400000   0.82529030
  0.63400000   0.82529085
  0.63400000   0.82529141
  0.63400000   0.82529196
  0.63400000   0.82529251
  0.63400000   0.82529306
  0.63400000   0.82529361
  0.63400000   0.82529416
  0.63450000   0.82527640
  0.63450000   0.82527698
  0.63450000   0.82527756
  0.63450000   0.82527814
  0.63450000   0.82527872
  0.63450000   0.82527930
  0.63450000   0.82527987
  0.63450000   0.82528045
  0.63450000   0.82528102
  0.63450000   0.82528160
  0.63450000   0.82528217
  0.63450000   0.82528274
  0.63450000   0.82528331
  0.63450000   0.82528388
  0.63450000   0.82528445
  0.63450000   0.82528502
  0.63450000   0.82528559
  0.63450000   0.82528615
  0.63450000   0.82528672
  0.63450000   0.82528728
  0.63450000   0.82528784
  0.63450000   0.82528841
  0.63450000   0.82528897
  0.63450000   0.82528953
  0.63450000   0.82529009
  0.63450000   0.82529065
  0.63450000   0.82529120
  0.63450000   0.82529176
  0.63450000   0.82529232
  0.63450000   0.82529287
  0.63450000   0.82529343
  0.63450000   0.82529398
  0.63450000   0.82529453
  0.63450000   0.82529508
  0.63450000   0.82529563
  0.63450000   0.82529618
  0.63450000   0.82529673
  0.63450000   0.82529728
  0.63450000   0.82529782
  0.63450000   0.82529837
  0.63500000   0.82528068
  0.63500000   0.82528126
  0.63500000   0.82528184
  0.63500000   0.82528242
  0.63500000   0.82528300
  0.63500000   0.82528357
  0.63500000   0.82528414
  0.63500000   0.82528472
  0.63500000   0.82528529
  0.63500000   0.82528586
  0.63500000   0.82528643
  0.63500000   0.82528700
  0.63500000   0.82528757
  0.63500000   0.82528814
  0.63500000   0.82528870
  0.63500000   0.82528927
  0.63500000   0.82528983
  0.63500000   0.82529040
  0.63500000   0.82529096
  0.63500000   0.82529152
  0.63500000   0.82529208
  0.63500000   0.82529264
  0.63500000   0.82529320
  0.63500000   0.82529376
  0.63500000   0.82529432
  0.63500000   0.82529487
  0.63500000   0.82529543
  0.63500000   0.82529598
  0.63500000   0.82529654
  0.63500000   0.82529709
  0.63500000   0.82529764
  0.63500000   0.82529819
  0.63500000   0.82529874
  0.63500000   0.82529929
  0.63500000   0.82529984
  0.63500000   0.82530039
  0.63500000   0.82530093
  0.63500000   0.82530148
  0.63500000   0.82530202
  0.63500000   0.82530257
  0.63550000   0.82528495
  0.63550000   0.82528553
  0.63550000   0.82528610
  0.63550000   0.82528668
  0.63550000   0.82528725
  0.63550000   0.82528783
  0.63550000   0.82528840
  0.63550000   0.82528897
  0.63550000   0.82528954
  0.63550000   0.82529011
  0.63550000   0.82529068
  0.63550000   0.82529124
  0.63550000   0.82529181
  0.63550000   0.82529237
  0.63550000   0.82529294
  0.63550000   0.82529350
  0.63550000   0.82529406
  0.63550000   0.82529463
  0.63550000   0.82529519
  0.63550000   0.82529575
  0.63550000   0.82529630
  0.63550000   0.82529686
  0.63550000   0.82529742
  0.63550000   0.82529798
  0.63550000   0.82529853
  0.63550000   0.82529908
  0.63550000   0.82529964
  0.63550000   0.82530019
  0.63550000   0.82530074
  0.63550000   0.82530129
  0.63550000   0.82530184
  0.63550000   0.82530239
  0.63550000   0.82530294
  0.63550000   0.82530348
  0.63550000   0.82530403
  0.63550000   0.82530457
  0.63550000   0.82530512
  0.63550000   0.82530566
  0.63550000   0.82530620
  0.63550000   0.82530675
  0.63600000   0.82528920
  0.63600000   0.82528978
  0.63600000   0.82529035
  0.63600000   0.82529092
  0.63600000   0.82529149
  0.63600000   0.82529206
  0.63600000   0.82529263
  0.63600000   0.82529320
  0.63600000   0.82529377
  0.63600000   0.82529434
  0.63600000   0.82529490
  0.63600000   0.82529547
  0.63600000   0.82529603
  0.63600000   0.82529659
  0.63600000   0.82529715
  0.63600000   0.82529772
  0.63600000   0.82529828
  0.63600000   0.82529884
  0.63600000   0.82529939
  0.63600000   0.82529995
  0.63600000   0.82530051
  0.63600000   0.82530106
  0.63600000   0.82530162
  0.63600000   0.82530217
  0.63600000   0.82530272
  0.63600000   0.82530327
  0.63600000   0.82530383
  0.63600000   0.82530438
  0.63600000   0.82530492
  0.63600000   0.82530547
  0.63600000   0.82530602
  0.63600000   0.82530657
  0.63600000   0.82530711
  0.63600000   0.82530766
  0.63600000   0.82530820
  0.63600000   0.82530874
  0.63600000   0.82530928
  0.63600000   0.82530983
  0.63600000   0.82531037
  0.63600000   0.82531090
  0.63650000   0.82529343
  0.63650000   0.82529400
  0.63650000   0.82529457
  0.63650000   0.82529514
  0.63650000   0.82529571
  0.63650000   0.82529628
  0.63650000   0.82529685
  0.63650000   0.82529741
  0.63650000   0.82529798
  0.63650000   0.82529854
  0.63650000   0.82529911
  0.63650000   0.82529967
  0.63650000   0.82530023
  0.63650000   0.82530079
  0.63650000   0.82530135
  0.63650000   0.82530191
  0.63650000   0.82530247
  0.63650000   0.82530303
  0.63650000   0.82530358
  0.63650000   0.82530414
  0.63650000   0.82530469
  0.63650000   0.82530524
  0.63650000   0.82530580
  0.63650000   0.82530635
  0.63650000   0.82530690
  0.63650000   0.82530745
  0.63650000   0.82530800
  0.63650000   0.82530854
  0.63650000   0.82530909
  0.63650000   0.82530964
  0.63650000   0.82531018
  0.63650000   0.82531072
  0.63650000   0.82531127
  0.63650000   0.82531181
  0.63650000   0.82531235
  0.63650000   0.82531289
  0.63650000   0.82531343
  0.63650000   0.82531397
  0.63650000   0.82531451
  0.63650000   0.82531504
  0.63700000   0.82529764
  0.63700000   0.82529821
  0.63700000   0.82529878
  0.63700000   0.82529935
  0.63700000   0.82529991
  0.63700000   0.82530048
  0.63700000   0.82530104
  0.63700000   0.82530161
  0.63700000   0.82530217
  0.63700000   0.82530273
  0.63700000   0.82530330
  0.63700000   0.82530386
  0.63700000   0.82530441
  0.63700000   0.82530497
  0.63700000   0.82530553
  0.63700000   0.82530609
  0.63700000   0.82530664
  0.63700000   0.82530720
  0.63700000   0.82530775
  0.63700000   0.82530830
  0.63700000   0.82530885
  0.63700000   0.82530941
  0.63700000   0.82530996
  0.63700000   0.82531050
  0.63700000   0.82531105
  0.63700000   0.82531160
  0.63700000   0.82531215
  0.63700000   0.82531269
  0.63700000   0.82531324
  0.63700000   0.82531378
  0.63700000   0.82531432
  0.63700000   0.82531486
  0.63700000   0.82531541
  0.63700000   0.82531595
  0.63700000   0.82531648
  0.63700000   0.82531702
  0.63700000   0.82531756
  0.63700000   0.82531810
  0.63700000   0.82531863
  0.63700000   0.82531917
  0.63750000   0.82530183
  0.63750000   0.82530240
  0.63750000   0.82530297
  0.63750000   0.82530353
  0.63750000   0.82530410
  0.63750000   0.82530466
  0.63750000   0.82530522
  0.63750000   0.82530578
  0.63750000   0.82530635
  0.63750000   0.82530691
  0.63750000   0.82530746
  0.63750000   0.82530802
  0.63750000   0.82530858
  0.63750000   0.82530913
  0.63750000   0.82530969
  0.63750000   0.82531024
  0.63750000   0.82531080
  0.63750000   0.82531135
  0.63750000   0.82531190
  0.63750000   0.82531245
  0.63750000   0.82531300
  0.63750000   0.82531355
  0.63750000   0.82531410
  0.63750000   0.82531464
  0.63750000   0.82531519
  0.63750000   0.82531573
  0.63750000   0.82531628
  0.63750000   0.82531682
  0.63750000   0.82531736
  0.63750000   0.82531791
  0.63750000   0.82531845
  0.63750000   0.82531899
  0.63750000   0.82531952
  0.63750000   0.82532006
  0.63750000   0.82532060
  0.63750000   0.82532114
  0.63750000   0.82532167
  0.63750000   0.82532220
  0.63750000   0.82532274
  0.63750000   0.82532327
  0.63800000   0.82530601
  0.63800000   0.82530657
  0.63800000   0.82530714
  0.63800000   0.82530770
  0.63800000   0.82530826
  0.63800000   0.82530882
  0.63800000   0.82530938
  0.63800000   0.82530994
  0.63800000   0.82531050
  0.63800000   0.82531106
  0.63800000   0.82531161
  0.63800000   0.82531217
  0.63800000   0.82531272
  0.63800000   0.82531328
  0.63800000   0.82531383
  0.63800000   0.82531438
  0.63800000   0.82531493
  0.63800000   0.82531548
  0.63800000   0.82531603
  0.63800000   0.82531658
  0.63800000   0.82531713
  0.63800000   0.82531767
  0.63800000   0.82531822
  0.63800000   0.82531876
  0.63800000   0.82531931
  0.63800000   0.82531985
  0.63800000   0.82532039
  0.63800000   0.82532093
  0.63800000   0.82532147
  0.63800000   0.82532201
  0.63800000   0.82532255
  0.63800000   0.82532309
  0.63800000   0.82532363
  0.63800000   0.82532416
  0.63800000   0.82532470
  0.63800000   0.82532523
  0.63800000   0.82532576
  0.63800000   0.82532629
  0.63800000   0.82532683
  0.63800000   0.82532736
  0.63850000   0.82531016
  0.63850000   0.82531072
  0.63850000   0.82531129
  0.63850000   0.82531185
  0.63850000   0.82531241
  0.63850000   0.82531297
  0.63850000   0.82531352
  0.63850000   0.82531408
  0.63850000   0.82531464
  0.63850000   0.82531519
  0.63850000   0.82531575
  0.63850000   0.82531630
  0.63850000   0.82531685
  0.63850000   0.82531740
  0.63850000   0.82531795
  0.63850000   0.82531850
  0.63850000   0.82531905
  0.63850000   0.82531960
  0.63850000   0.82532015
  0.63850000   0.82532069
  0.63850000   0.82532124
  0.63850000   0.82532178
  0.63850000   0.82532233
  0.63850000   0.82532287
  0.63850000   0.82532341
  0.63850000   0.82532395
  0.63850000   0.82532449
  0.63850000   0.82532503
  0.63850000   0.82532557
  0.63850000   0.82532610
  0.63850000   0.82532664
  0.63850000   0.82532717
  0.63850000   0.82532771
  0.63850000   0.82532824
  0.63850000   0.82532877
  0.63850000   0.82532931
  0.63850000   0.82532984
  0.63850000   0.82533037
  0.63850000   0.82533090
  0.63850000   0.82533142
  0.63900000   0.82531430
  0.63900000   0.82531486
  0.63900000   0.82531542
  0.63900000   0.82531598
  0.63900000   0.82531653
  0.63900000   0.82531709
  0.63900000   0.82531765
  0.63900000   0.82531820
  0.63900000   0.82531875
  0.63900000   0.82531931
  0.63900000   0.82531986
  0.63900000   0.82532041
  0.63900000   0.82532096
  0.63900000   0.82532151
  0.63900000   0.82532206
  0.63900000   0.82532261
  0.63900000   0.82532315
  0.63900000   0.82532370
  0.63900000   0.82532424
  0.63900000   0.82532479
  0.63900000   0.82532533
  0.63900000   0.82532587
  0.63900000   0.82532641
  0.63900000   0.82532695
  0.63900000   0.82532749
  0.63900000   0.82532803
  0.63900000   0.82532857
  0.63900000   0.82532910
  0.63900000   0.82532964
  0.63900000   0.82533017
  0.63900000   0.82533071
  0.63900000   0.82533124
  0.63900000   0.82533177
  0.63900000   0.82533230
  0.63900000   0.82533283
  0.63900000   0.82533336
  0.63900000   0.82533389
  0.63900000   0.82533442
  0.63900000   0.82533495
  0.63900000   0.82533547
  0.63950000   0.82531842
  0.63950000   0.82531897
  0.63950000   0.82531953
  0.63950000   0.82532009
  0.63950000   0.82532064
  0.63950000   0.82532120
  0.63950000   0.82532175
  0.63950000   0.82532230
  0.63950000   0.82532285
  0.63950000   0.82532341
  0.63950000   0.82532395
  0.63950000   0.82532450
  0.63950000   0.82532505
  0.63950000   0.82532560
  0.63950000   0.82532614
  0.63950000   0.82532669
  0.63950000   0.82532723
  0.63950000   0.82532778
  0.63950000   0.82532832
  0.63950000   0.82532886
  0.63950000   0.82532940
  0.63950000   0.82532994
  0.63950000   0.82533048
  0.63950000   0.82533102
  0.63950000   0.82533155
  0.63950000   0.82533209
  0.63950000   0.82533263
  0.63950000   0.82533316
  0.63950000   0.82533369
  0.63950000   0.82533423
  0.63950000   0.82533476
  0.63950000   0.82533529
  0.63950000   0.82533582
  0.63950000   0.82533635
  0.63950000   0.82533688
  0.63950000   0.82533740
  0.63950000   0.82533793
  0.63950000   0.82533845
  0.63950000   0.82533898
  0.63950000   0.82533950
  0.64000000   0.82532252
  0.64000000   0.82532307
  0.64000000   0.82532363
  0.64000000   0.82532418
  0.64000000   0.82532473
  0.64000000   0.82532529
  0.64000000   0.82532584
  0.64000000   0.82532639
  0.64000000   0.82532694
  0.64000000   0.82532748
  0.64000000   0.82532803
  0.64000000   0.82532858
  0.64000000   0.82532912
  0.64000000   0.82532967
  0.64000000   0.82533021
  0.64000000   0.82533075
  0.64000000   0.82533130
  0.64000000   0.82533184
  0.64000000   0.82533238
  0.64000000   0.82533292
  0.64000000   0.82533346
  0.64000000   0.82533399
  0.64000000   0.82533453
  0.64000000   0.82533507
  0.64000000   0.82533560
  0.64000000   0.82533613
  0.64000000   0.82533667
  0.64000000   0.82533720
  0.64000000   0.82533773
  0.64000000   0.82533826
  0.64000000   0.82533879
  0.64000000   0.82533932
  0.64000000   0.82533985
  0.64000000   0.82534037
  0.64000000   0.82534090
  0.64000000   0.82534142
  0.64000000   0.82534195
  0.64000000   0.82534247
  0.64000000   0.82534299
  0.64000000   0.82534352
  0.64050000   0.82532660
  0.64050000   0.82532715
  0.64050000   0.82532770
  0.64050000   0.82532825
  0.64050000   0.82532881
  0.64050000   0.82532936
  0.64050000   0.82532990
  0.64050000   0.82533045
  0.64050000   0.82533100
  0.64050000   0.82533155
  0.64050000   0.82533209
  0.64050000   0.82533263
  0.64050000   0.82533318
  0.64050000   0.82533372
  0.64050000   0.82533426
  0.64050000   0.82533480
  0.64050000   0.82533534
  0.64050000   0.82533588
  0.64050000   0.82533642
  0.64050000   0.82533696
  0.64050000   0.82533749
  0.64050000   0.82533803
  0.64050000   0.82533856
  0.64050000   0.82533909
  0.64050000   0.82533963
  0.64050000   0.82534016
  0.64050000   0.82534069
  0.64050000   0.82534122
  0.64050000   0.82534175
  0.64050000   0.82534228
  0.64050000   0.82534280
  0.64050000   0.82534333
  0.64050000   0.82534386
  0.64050000   0.82534438
  0.64050000   0.82534490
  0.64050000   0.82534543
  0.64050000   0.82534595
  0.64050000   0.82534647
  0.64050000   0.82534699
  0.64050000   0.82534751
  0.64100000   0.82533066
  0.64100000   0.82533121
  0.64100000   0.82533176
  0.64100000   0.82533231
  0.64100000   0.82533286
  0.64100000   0.82533341
  0.64100000   0.82533395
  0.64100000   0.82533450
  0.64100000   0.82533504
  0.64100000   0.82533559
  0.64100000   0.82533613
  0.64100000   0.82533667
  0.64100000   0.82533721
  0.64100000   0.82533775
  0.64100000   0.82533829
  0.64100000   0.82533883
  0.64100000   0.82533937
  0.64100000   0.82533991
  0.64100000   0.82534044
  0.64100000   0.82534098
  0.64100000   0.82534151
  0.64100000   0.82534204
  0.64100000   0.82534258
  0.64100000   0.82534311
  0.64100000   0.82534364
  0.64100000   0.82534417
  0.64100000   0.82534469
  0.64100000   0.82534522
  0.64100000   0.82534575
  0.64100000   0.82534628
  0.64100000   0.82534680
  0.64100000   0.82534732
  0.64100000   0.82534785
  0.64100000   0.82534837
  0.64100000   0.82534889
  0.64100000   0.82534941
  0.64100000   0.82534993
  0.64100000   0.82535045
  0.64100000   0.82535097
  0.64100000   0.82535149
  0.64150000   0.82533470
  0.64150000   0.82533525
  0.64150000   0.82533580
  0.64150000   0.82533635
  0.64150000   0.82533690
  0.64150000   0.82533744
  0.64150000   0.82533799
  0.64150000   0.82533853
  0.64150000   0.82533907
  0.64150000   0.82533961
  0.64150000   0.82534015
  0.64150000   0.82534069
  0.64150000   0.82534123
  0.64150000   0.82534177
  0.64150000   0.82534231
  0.64150000   0.82534284
  0.64150000   0.82534338
  0.64150000   0.82534391
  0.64150000   0.82534445
  0.64150000   0.82534498
  0.64150000   0.82534551
  0.64150000   0.82534604
  0.64150000   0.82534657
  0.64150000   0.82534710
  0.64150000   0.82534763
  0.64150000   0.82534816
  0.64150000   0.82534868
  0.64150000   0.82534921
  0.64150000   0.82534973
  0.64150000   0.82535026
  0.64150000   0.82535078
  0.64150000   0.82535130
  0.64150000   0.82535182
  0.64150000   0.82535234
  0.64150000   0.82535286
  0.64150000   0.82535338
  0.64150000   0.82535390
  0.64150000   0.82535442
  0.64150000   0.82535493
  0.64150000   0.82535545
  0.64200000   0.82533873
  0.64200000   0.82533928
  0.64200000   0.82533982
  0.64200000   0.82534037
  0.64200000   0.82534091
  0.64200000   0.82534146
  0.64200000   0.82534200
  0.64200000   0.82534254
  0.64200000   0.82534308
  0.64200000   0.82534362
  0.64200000   0.82534416
  0.64200000   0.82534470
  0.64200000   0.82534523
  0.64200000   0.82534577
  0.64200000   0.82534630
  0.64200000   0.82534684
  0.64200000   0.82534737
  0.64200000   0.82534790
  0.64200000   0.82534843
  0.64200000   0.82534896
  0.64200000   0.82534949
  0.64200000   0.82535002
  0.64200000   0.82535055
  0.64200000   0.82535108
  0.64200000   0.82535160
  0.64200000   0.82535213
  0.64200000   0.82535265
  0.64200000   0.82535317
  0.64200000   0.82535370
  0.64200000   0.82535422
  0.64200000   0.82535474
  0.64200000   0.82535526
  0.64200000   0.82535578
  0.64200000   0.82535630
  0.64200000   0.82535681
  0.64200000   0.82535733
  0.64200000   0.82535785
  0.64200000   0.82535836
  0.64200000   0.82535887
  0.64200000   0.82535939
  0.64250000   0.82534274
  0.64250000   0.82534329
  0.64250000   0.82534383
  0.64250000   0.82534437
  0.64250000   0.82534491
  0.64250000   0.82534545
  0.64250000   0.82534599
  0.64250000   0.82534653
  0.64250000   0.82534707
  0.64250000   0.82534761
  0.64250000   0.82534814
  0.64250000   0.82534868
  0.64250000   0.82534921
  0.64250000   0.82534975
  0.64250000   0.82535028
  0.64250000   0.82535081
  0.64250000   0.82535134
  0.64250000   0.82535187
  0.64250000   0.82535240
  0.64250000   0.82535293
  0.64250000   0.82535346
  0.64250000   0.82535398
  0.64250000   0.82535451
  0.64250000   0.82535503
  0.64250000   0.82535556
  0.64250000   0.82535608
  0.64250000   0.82535660
  0.64250000   0.82535712
  0.64250000   0.82535764
  0.64250000   0.82535816
  0.64250000   0.82535868
  0.64250000   0.82535920
  0.64250000   0.82535972
  0.64250000   0.82536023
  0.64250000   0.82536075
  0.64250000   0.82536126
  0.64250000   0.82536178
  0.64250000   0.82536229
  0.64250000   0.82536280
  0.64250000   0.82536331
  0.64300000   0.82534673
  0.64300000   0.82534727
  0.64300000   0.82534782
  0.64300000   0.82534836
  0.64300000   0.82534890
  0.64300000   0.82534943
  0.64300000   0.82534997
  0.64300000   0.82535051
  0.64300000   0.82535104
  0.64300000   0.82535158
  0.64300000   0.82535211
  0.64300000   0.82535265
  0.64300000   0.82535318
  0.64300000   0.82535371
  0.64300000   0.82535424
  0.64300000   0.82535477
  0.64300000   0.82535530
  0.64300000   0.82535583
  0.64300000   0.82535635
  0.64300000   0.82535688
  0.64300000   0.82535740
  0.64300000   0.82535793
  0.64300000   0.82535845
  0.64300000   0.82535897
  0.64300000   0.82535950
  0.64300000   0.82536002
  0.64300000   0.82536054
  0.64300000   0.82536106
  0.64300000   0.82536157
  0.64300000   0.82536209
  0.64300000   0.82536261
  0.64300000   0.82536312
  0.64300000   0.82536364
  0.64300000   0.82536415
  0.64300000   0.82536467
  0.64300000   0.82536518
  0.64300000   0.82536569
  0.64300000   0.82536620
  0.64300000   0.82536671
  0.64300000   0.82536722
  0.64350000   0.82535071
  0.64350000   0.82535125
  0.64350000   0.82535178
  0.64350000   0.82535232
  0.64350000   0.82535286
  0.64350000   0.82535340
  0.64350000   0.82535393
  0.64350000   0.82535447
  0.64350000   0.82535500
  0.64350000   0.82535553
  0.64350000   0.82535606
  0.64350000   0.82535660
  0.64350000   0.82535713
  0.64350000   0.82535765
  0.64350000   0.82535818
  0.64350000   0.82535871
  0.64350000   0.82535924
  0.64350000   0.82535976
  0.64350000   0.82536029
  0.64350000   0.82536081
  0.64350000   0.82536133
  0.64350000   0.82536186
  0.64350000   0.82536238
  0.64350000   0.82536290
  0.64350000   0.82536342
  0.64350000   0.82536394
  0.64350000   0.82536445
  0.64350000   0.82536497
  0.64350000   0.82536549
  0.64350000   0.82536600
  0.64350000   0.82536652
  0.64350000   0.82536703
  0.64350000   0.82536754
  0.64350000   0.82536805
  0.64350000   0.82536856
  0.64350000   0.82536907
  0.64350000   0.82536958
  0.64350000   0.82537009
  0.64350000   0.82537060
  0.64350000   0.82537111
  0.64400000   0.82535466
  0.64400000   0.82535520
  0.64400000   0.82535574
  0.64400000   0.82535627
  0.64400000   0.82535681
  0.64400000   0.82535734
  0.64400000   0.82535787
  0.64400000   0.82535841
  0.64400000   0.82535894
  0.64400000   0.82535947
  0.64400000   0.82536000
  0.64400000   0.82536053
  0.64400000   0.82536106
  0.64400000   0.82536158
  0.64400000   0.82536211
  0.64400000   0.82536263
  0.64400000   0.82536316
  0.64400000   0.82536368
  0.64400000   0.82536420
  0.64400000   0.82536473
  0.64400000   0.82536525
  0.64400000   0.82536577
  0.64400000   0.82536628
  0.64400000   0.82536680
  0.64400000   0.82536732
  0.64400000   0.82536784
  0.64400000   0.82536835
  0.64400000   0.82536887
  0.64400000   0.82536938
  0.64400000   0.82536989
  0.64400000   0.82537041
  0.64400000   0.82537092
  0.64400000   0.82537143
  0.64400000   0.82537194
  0.64400000   0.82537245
  0.64400000   0.82537295
  0.64400000   0.82537346
  0.64400000   0.82537397
  0.64400000   0.82537447
  0.64400000   0.82537498
  0.64450000   0.82535860
  0.64450000   0.82535914
  0.64450000   0.82535967
  0.64450000   0.82536020
  0.64450000   0.82536074
  0.64450000   0.82536127
  0.64450000   0.82536180
  0.64450000   0.82536233
  0.64450000   0.82536286
  0.64450000   0.82536339
  0.64450000   0.82536391
  0.64450000   0.82536444
  0.64450000   0.82536497
  0.64450000   0.82536549
  0.64450000   0.82536602
  0.64450000   0.82536654
  0.64450000   0.82536706
  0.64450000   0.82536758
  0.64450000   0.82536810
  0.64450000   0.82536862
  0.64450000   0.82536914
  0.64450000   0.82536966
  0.64450000   0.82537017
  0.64450000   0.82537069
  0.64450000   0.82537121
  0.64450000   0.82537172
  0.64450000   0.82537223
  0.64450000   0.82537275
  0.64450000   0.82537326
  0.64450000   0.82537377
  0.64450000   0.82537428
  0.64450000   0.82537479
  0.64450000   0.82537530
  0.64450000   0.82537580
  0.64450000   0.82537631
  0.64450000   0.82537682
  0.64450000   0.82537732
  0.64450000   0.82537783
  0.64450000   0.82537833
  0.64450000   0.82537883
  0.64500000   0.82536252
  0.64500000   0.82536305
  0.64500000   0.82536359
  0.64500000   0.82536412
  0.64500000   0.82536465
  0.64500000   0.82536518
  0.64500000   0.82536571
  0.64500000   0.82536623
  0.64500000   0.82536676
  0.64500000   0.82536729
  0.64500000   0.82536781
  0.64500000   0.82536834
  0.64500000   0.82536886
  0.64500000   0.82536938
  0.64500000   0.82536991
  0.64500000   0.82537043
  0.64500000   0.82537095
  0.64500000   0.82537147
  0.64500000   0.82537198
  0.64500000   0.82537250
  0.64500000   0.82537302
  0.64500000   0.82537353
  0.64500000   0.82537405
  0.64500000   0.82537456
  0.64500000   0.82537507
  0.64500000   0.82537559
  0.64500000   0.82537610
  0.64500000   0.82537661
  0.64500000   0.82537712
  0.64500000   0.82537763
  0.64500000   0.82537813
  0.64500000   0.82537864
  0.64500000   0.82537915
  0.64500000   0.82537965
  0.64500000   0.82538016
  0.64500000   0.82538066
  0.64500000   0.82538116
  0.64500000   0.82538167
  0.64500000   0.82538217
  0.64500000   0.82538267
  0.64550000   0.82536642
  0.64550000   0.82536695
  0.64550000   0.82536748
  0.64550000   0.82536801
  0.64550000   0.82536854
  0.64550000   0.82536907
  0.64550000   0.82536960
  0.64550000   0.82537012
  0.64550000   0.82537065
  0.64550000   0.82537117
  0.64550000   0.82537169
  0.64550000   0.82537222
  0.64550000   0.82537274
  0.64550000   0.82537326
  0.64550000   0.82537378
  0.64550000   0.82537430
  0.64550000   0.82537481
  0.64550000   0.82537533
  0.64550000   0.82537585
  0.64550000   0.82537636
  0.64550000   0.82537688
  0.64550000   0.82537739
  0.64550000   0.82537790
  0.64550000   0.82537841
  0.64550000   0.82537893
  0.64550000   0.82537944
  0.64550000   0.82537994
  0.64550000   0.82538045
  0.64550000   0.82538096
  0.64550000   0.82538147
  0.64550000   0.82538197
  0.64550000   0.82538248
  0.64550000   0.82538298
  0.64550000   0.82538349
  0.64550000   0.82538399
  0.64550000   0.82538449
  0.64550000   0.82538499
  0.64550000   0.82538549
  0.64550000   0.82538599
  0.64550000   0.82538649
  0.64600000   0.82537031
  0.64600000   0.82537084
  0.64600000   0.82537137
  0.64600000   0.82537189
  0.64600000   0.82537242
  0.64600000   0.82537294
  0.64600000   0.82537347
  0.64600000   0.82537399
  0.64600000   0.82537452
  0.64600000   0.82537504
  0.64600000   0.82537556
  0.64600000   0.82537608
  0.64600000   0.82537660
  0.64600000   0.82537712
  0.64600000   0.82537763
  0.64600000   0.82537815
  0.64600000   0.82537866
  0.64600000   0.82537918
  0.64600000   0.82537969
  0.64600000   0.82538021
  0.64600000   0.82538072
  0.64600000   0.82538123
  0.64600000   0.82538174
  0.64600000   0.82538225
  0.64600000   0.82538276
  0.64600000   0.82538327
  0.64600000   0.82538377
  0.64600000   0.82538428
  0.64600000   0.82538479
  0.64600000   0.82538529
  0.64600000   0.82538579
  0.64600000   0.82538630
  0.64600000   0.82538680
  0.64600000   0.82538730
  0.64600000   0.82538780
  0.64600000   0.82538830
  0.64600000   0.82538880
  0.64600000   0.82538930
  0.64600000   0.82538979
  0.64600000   0.82539029
  0.64650000   0.82537418
  0.64650000   0.82537470
  0.64650000   0.82537523
  0.64650000   0.82537575
  0.64650000   0.82537628
  0.64650000   0.82537680
  0.64650000   0.82537732
  0.64650000   0.82537785
  0.64650000   0.82537837
  0.64650000   0.82537889
  0.64650000   0.82537940
  0.64650000   0.82537992
  0.64650000   0.82538044
  0.64650000   0.82538096
  0.64650000   0.82538147
  0.64650000   0.82538198
  0.64650000   0.82538250
  0.64650000   0.82538301
  0.64650000   0.82538352
  0.64650000   0.82538403
  0.64650000   0.82538454
  0.64650000   0.82538505
  0.64650000   0.82538556
  0.64650000   0.82538607
  0.64650000   0.82538658
  0.64650000   0.82538708
  0.64650000   0.82538759
  0.64650000   0.82538809
  0.64650000   0.82538859
  0.64650000   0.82538910
  0.64650000   0.82538960
  0.64650000   0.82539010
  0.64650000   0.82539060
  0.64650000   0.82539110
  0.64650000   0.82539160
  0.64650000   0.82539209
  0.64650000   0.82539259
  0.64650000   0.82539309
  0.64650000   0.82539358
  0.64650000   0.82539408
  0.64700000   0.82537803
  0.64700000   0.82537855
  0.64700000   0.82537908
  0.64700000   0.82537960
  0.64700000   0.82538012
  0.64700000   0.82538064
  0.64700000   0.82538116
  0.64700000   0.82538168
  0.64700000   0.82538220
  0.64700000   0.82538272
  0.64700000   0.82538323
  0.64700000   0.82538375
  0.64700000   0.82538426
  0.64700000   0.82538478
  0.64700000   0.82538529
  0.64700000   0.82538580
  0.64700000   0.82538631
  0.64700000   0.82538683
  0.64700000   0.82538734
  0.64700000   0.82538784
  0.64700000   0.82538835
  0.64700000   0.82538886
  0.64700000   0.82538937
  0.64700000   0.82538987
  0.64700000   0.82539038
  0.64700000   0.82539088
  0.64700000   0.82539138
  0.64700000   0.82539188
  0.64700000   0.82539239
  0.64700000   0.82539289
  0.64700000   0.82539339
  0.64700000   0.82539388
  0.64700000   0.82539438
  0.64700000   0.82539488
  0.64700000   0.82539538
  0.64700000   0.82539587
  0.64700000   0.82539637
  0.64700000   0.82539686
  0.64700000   0.82539735
  0.64700000   0.82539784
  0.64750000   0.82538186
  0.64750000   0.82538238
  0.64750000   0.82538291
  0.64750000   0.82538343
  0.64750000   0.82538395
  0.64750000   0.82538446
  0.64750000   0.82538498
  0.64750000   0.82538550
  0.64750000   0.82538602
  0.64750000   0.82538653
  0.64750000   0.82538705
  0.64750000   0.82538756
  0.64750000   0.82538807
  0.64750000   0.82538858
  0.64750000   0.82538909
  0.64750000   0.82538961
  0.64750000   0.82539011
  0.64750000   0.82539062
  0.64750000   0.82539113
  0.64750000   0.82539164
  0.64750000   0.82539214
  0.64750000   0.82539265
  0.64750000   0.82539315
  0.64750000   0.82539366
  0.64750000   0.82539416
  0.64750000   0.82539466
  0.64750000   0.82539516
  0.64750000   0.82539566
  0.64750000   0.82539616
  0.64750000   0.82539666
  0.64750000   0.82539716
  0.64750000   0.82539765
  0.64750000   0.82539815
  0.64750000   0.82539864
  0.64750000   0.82539914
  0.64750000   0.82539963
  0.64750000   0.82540012
  0.64750000   0.82540061
  0.64750000   0.82540111
  0.64750000   0.82540160
  0.64800000   0.82538568
  0.64800000   0.82538620
  0.64800000   0.82538672
  0.64800000   0.82538724
  0.64800000   0.82538775
  0.64800000   0.82538827
  0.64800000   0.82538879
  0.64800000   0.82538930
  0.64800000   0.82538982
  0.64800000   0.82539033
  0.64800000   0.82539084
  0.64800000   0.82539135
  0.64800000   0.82539186
  0.64800000   0.82539237
  0.64800000   0.82539288
  0.64800000   0.82539339
  0.64800000   0.82539390
  0.64800000   0.82539440
  0.64800000   0.82539491
  0.64800000   0.82539541
  0.64800000   0.82539592
  0.64800000   0.82539642
  0.64800000   0.82539692
  0.64800000   0.82539742
  0.64800000   0.82539792
  0.64800000   0.82539842
  0.64800000   0.82539892
  0.64800000   0.82539942
  0.64800000   0.82539992
  0.64800000   0.82540041
  0.64800000   0.82540091
  0.64800000   0.82540140
  0.64800000   0.82540190
  0.64800000   0.82540239
  0.64800000   0.82540288
  0.64800000   0.82540337
  0.64800000   0.82540386
  0.64800000   0.82540435
  0.64800000   0.82540484
  0.64800000   0.82540533
  0.64850000   0.82538948
  0.64850000   0.82539000
  0.64850000   0.82539051
  0.64850000   0.82539103
  0.64850000   0.82539154
  0.64850000   0.82539206
  0.64850000   0.82539257
  0.64850000   0.82539309
  0.64850000   0.82539360
  0.64850000   0.82539411
  0.64850000   0.82539462
  0.64850000   0.82539513
  0.64850000   0.82539564
  0.64850000   0.82539614
  0.64850000   0.82539665
  0.64850000   0.82539716
  0.64850000   0.82539766
  0.64850000   0.82539817
  0.64850000   0.82539867
  0.64850000   0.82539917
  0.64850000   0.82539967
  0.64850000   0.82540017
  0.64850000   0.82540067
  0.64850000   0.82540117
  0.64850000   0.82540167
  0.64850000   0.82540217
  0.64850000   0.82540267
  0.64850000   0.82540316
  0.64850000   0.82540366
  0.64850000   0.82540415
  0.64850000   0.82540464
  0.64850000   0.82540514
  0.64850000   0.82540563
  0.64850000   0.82540612
  0.64850000   0.82540661
  0.64850000   0.82540710
  0.64850000   0.82540759
  0.64850000   0.82540807
  0.64850000   0.82540856
  0.64850000   0.82540905
  0.64900000   0.82539326
  0.64900000   0.82539378
  0.64900000   0.82539429
  0.64900000   0.82539481
  0.64900000   0.82539532
  0.64900000   0.82539583
  0.64900000   0.82539634
  0.64900000   0.82539685
  0.64900000   0.82539736
  0.64900000   0.82539787
  0.64900000   0.82539838
  0.64900000   0.82539889
  0.64900000   0.82539939
  0.64900000   0.82539990
  0.64900000   0.82540040
  0.64900000   0.82540091
  0.64900000   0.82540141
  0.64900000   0.82540191
  0.64900000   0.82540241
  0.64900000   0.82540291
  0.64900000   0.82540341
  0.64900000   0.82540391
  0.64900000   0.82540441
  0.64900000   0.82540491
  0.64900000   0.82540540
  0.64900000   0.82540590
  0.64900000   0.82540639
  0.64900000   0.82540689
  0.64900000   0.82540738
  0.64900000   0.82540787
  0.64900000   0.82540836
  0.64900000   0.82540885
  0.64900000   0.82540934
  0.64900000   0.82540983
  0.64900000   0.82541032
  0.64900000   0.82541081
  0.64900000   0.82541129
  0.64900000   0.82541178
  0.64900000   0.82541226
  0.64900000   0.82541275
  0.64950000   0.82539703
  0.64950000   0.82539754
  0.64950000   0.82539805
  0.64950000   0.82539856
  0.64950000   0.82539908
  0.64950000   0.82539959
  0.64950000   0.82540010
  0.64950000   0.82540060
  0.64950000   0.82540111
  0.64950000   0.82540162
  0.64950000   0.82540212
  0.64950000   0.82540263
  0.64950000   0.82540313
  0.64950000   0.82540364
  0.64950000   0.82540414
  0.64950000   0.82540464
  0.64950000   0.82540514
  0.64950000   0.82540564
  0.64950000   0.82540614
  0.64950000   0.82540664
  0.64950000   0.82540714
  0.64950000   0.82540763
  0.64950000   0.82540813
  0.64950000   0.82540862
  0.64950000   0.82540912
  0.64950000   0.82540961
  0.64950000   0.82541010
  0.64950000   0.82541060
  0.64950000   0.82541109
  0.64950000   0.82541158
  0.64950000   0.82541207
  0.64950000   0.82541255
  0.64950000   0.82541304
  0.64950000   0.82541353
  0.64950000   0.82541402
  0.64950000   0.82541450
  0.64950000   0.82541498
  0.64950000   0.82541547
  0.64950000   0.82541595
  0.64950000   0.82541643
  0.65000000   0.82540077
  0.65000000   0.82540129
  0.65000000   0.82540180
  0.65000000   0.82540231
  0.65000000   0.82540282
  0.65000000   0.82540332
  0.65000000   0.82540383
  0.65000000   0.82540434
  0.65000000   0.82540484
  0.65000000   0.82540535
  0.65000000   0.82540585
  0.65000000   0.82540636
  0.65000000   0.82540686
  0.65000000   0.82540736
  0.65000000   0.82540786
  0.65000000   0.82540836
  0.65000000   0.82540886
  0.65000000   0.82540936
  0.65000000   0.82540985
  0.65000000   0.82541035
  0.65000000   0.82541084
  0.65000000   0.82541134
  0.65000000   0.82541183
  0.65000000   0.82541233
  0.65000000   0.82541282
  0.65000000   0.82541331
  0.65000000   0.82541380
  0.65000000   0.82541429
  0.65000000   0.82541478
  0.65000000   0.82541527
  0.65000000   0.82541575
  0.65000000   0.82541624
  0.65000000   0.82541672
  0.65000000   0.82541721
  0.65000000   0.82541769
  0.65000000   0.82541818
  0.65000000   0.82541866
  0.65000000   0.82541914
  0.65000000   0.82541962
  0.65000000   0.82542010
  0.65050000   0.82540451
  0.65050000   0.82540502
  0.65050000   0.82540553
  0.65050000   0.82540603
  0.65050000   0.82540654
  0.65050000   0.82540705
  0.65050000   0.82540755
  0.65050000   0.82540806
  0.65050000   0.82540856
  0.65050000   0.82540906
  0.65050000   0.82540956
  0.65050000   0.82541006
  0.65050000   0.82541056
  0.65050000   0.82541106
  0.65050000   0.82541156
  0.65050000   0.82541206
  0.65050000   0.82541256
  0.65050000   0.82541305
  0.65050000   0.82541355
  0.65050000   0.82541404
  0.65050000   0.82541453
  0.65050000   0.82541503
  0.65050000   0.82541552
  0.65050000   0.82541601
  0.65050000   0.82541650
  0.65050000   0.82541699
  0.65050000   0.82541748
  0.65050000   0.82541796
  0.65050000   0.82541845
  0.65050000   0.82541894
  0.65050000   0.82541942
  0.65050000   0.82541991
  0.65050000   0.82542039
  0.65050000   0.82542087
  0.65050000   0.82542135
  0.65050000   0.82542184
  0.65050000   0.82542232
  0.65050000   0.82542280
  0.65050000   0.82542327
  0.65050000   0.82542375
  0.65100000   0.82540822
  0.65100000   0.82540873
  0.65100000   0.82540924
  0.65100000   0.82540974
  0.65100000   0.82541025
  0.65100000   0.82541075
  0.65100000   0.82541125
  0.65100000   0.82541176
  0.65100000   0.82541226
  0.65100000   0.82541276
  0.65100000   0.82541326
  0.65100000   0.82541376
  0.65100000   0.82541425
  0.65100000   0.82541475
  0.65100000   0.82541525
  0.65100000   0.82541574
  0.65100000   0.82541624
  0.65100000   0.82541673
  0.65100000   0.82541722
  0.65100000   0.82541772
  0.65100000   0.82541821
  0.65100000   0.82541870
  0.65100000   0.82541919
  0.65100000   0.82541968
  0.65100000   0.82542016
  0.65100000   0.82542065
  0.65100000   0.82542114
  0.65100000   0.82542162
  0.65100000   0.82542211
  0.65100000   0.82542259
  0.65100000   0.82542308
  0.65100000   0.82542356
  0.65100000   0.82542404
  0.65100000   0.82542452
  0.65100000   0.82542500
  0.65100000   0.82542548
  0.65100000   0.82542596
  0.65100000   0.82542643
  0.65100000   0.82542691
  0.65100000   0.82542739
  0.65150000   0.82541192
  0.65150000   0.82541243
  0.65150000   0.82541293
  0.65150000   0.82541343
  0.65150000   0.82541394
  0.65150000   0.82541444
  0.65150000   0.82541494
  0.65150000   0.82541544
  0.65150000   0.82541594
  0.65150000   0.82541644
  0.65150000   0.82541694
  0.65150000   0.82541743
  0.65150000   0.82541793
  0.65150000   0.82541842
  0.65150000   0.82541892
  0.65150000   0.82541941
  0.65150000   0.82541990
  0.65150000   0.82542039
  0.65150000   0.82542089
  0.65150000   0.82542138
  0.65150000   0.82542186
  0.65150000   0.82542235
  0.65150000   0.82542284
  0.65150000   0.82542333
  0.65150000   0.82542381
  0.65150000   0.82542430
  0.65150000   0.82542478
  0.65150000   0.82542527
  0.65150000   0.82542575
  0.65150000   0.82542623
  0.65150000   0.82542671
  0.65150000   0.82542719
  0.65150000   0.82542767
  0.65150000   0.82542815
  0.65150000   0.82542863
  0.65150000   0.82542911
  0.65150000   0.82542958
  0.65150000   0.82543006
  0.65150000   0.82543053
  0.65150000   0.82543101
  0.65200000   0.82541560
  0.65200000   0.82541611
  0.65200000   0.82541661
  0.65200000   0.82541711
  0.65200000   0.82541761
  0.65200000   0.82541811
  0.65200000   0.82541861
  0.65200000   0.82541911
  0.65200000   0.82541960
  0.65200000   0.82542010
  0.65200000   0.82542060
  0.65200000   0.82542109
  0.65200000   0.82542158
  0.65200000   0.82542208
  0.65200000   0.82542257
  0.65200000   0.82542306
  0.65200000   0.82542355
  0.65200000   0.82542404
  0.65200000   0.82542453
  0.65200000   0.82542502
  0.65200000   0.82542551
  0.65200000   0.82542599
  0.65200000   0.82542648
  0.65200000   0.82542696
  0.65200000   0.82542745
  0.65200000   0.82542793
  0.65200000   0.82542841
  0.65200000   0.82542889
  0.65200000   0.82542937
  0.65200000   0.82542985
  0.65200000   0.82543033
  0.65200000   0.82543081
  0.65200000   0.82543129
  0.65200000   0.82543176
  0.65200000   0.82543224
  0.65200000   0.82543272
  0.65200000   0.82543319
  0.65200000   0.82543366
  0.65200000   0.82543414
  0.65200000   0.82543461
  0.65250000   0.82541927
  0.65250000   0.82541977
  0.65250000   0.82542027
  0.65250000   0.82542077
  0.65250000   0.82542127
  0.65250000   0.82542177
  0.65250000   0.82542226
  0.65250000   0.82542276
  0.65250000   0.82542325
  0.65250000   0.82542375
  0.65250000   0.82542424
  0.65250000   0.82542473
  0.65250000   0.82542523
  0.65250000   0.82542572
  0.65250000   0.82542621
  0.65250000   0.82542670
  0.65250000   0.82542718
  0.65250000   0.82542767
  0.65250000   0.82542816
  0.65250000   0.82542864
  0.65250000   0.82542913
  0.65250000   0.82542961
  0.65250000   0.82543010
  0.65250000   0.82543058
  0.65250000   0.82543106
  0.65250000   0.82543154
  0.65250000   0.82543202
  0.65250000   0.82543250
  0.65250000   0.82543298
  0.65250000   0.82543346
  0.65250000   0.82543394
  0.65250000   0.82543441
  0.65250000   0.82543489
  0.65250000   0.82543536
  0.65250000   0.82543584
  0.65250000   0.82543631
  0.65250000   0.82543678
  0.65250000   0.82543725
  0.65250000   0.82543772
  0.65250000   0.82543819
  0.65300000   0.82542292
  0.65300000   0.82542342
  0.65300000   0.82542392
  0.65300000   0.82542441
  0.65300000   0.82542491
  0.65300000   0.82542540
  0.65300000   0.82542590
  0.65300000   0.82542639
  0.65300000   0.82542689
  0.65300000   0.82542738
  0.65300000   0.82542787
  0.65300000   0.82542836
  0.65300000   0.82542885
  0.65300000   0.82542934
  0.65300000   0.82542983
  0.65300000   0.82543031
  0.65300000   0.82543080
  0.65300000   0.82543129
  0.65300000   0.82543177
  0.65300000   0.82543225
  0.65300000   0.82543274
  0.65300000   0.82543322
  0.65300000   0.82543370
  0.65300000   0.82543418
  0.65300000   0.82543466
  0.65300000   0.82543514
  0.65300000   0.82543562
  0.65300000   0.82543610
  0.65300000   0.82543657
  0.65300000   0.82543705
  0.65300000   0.82543752
  0.65300000   0.82543800
  0.65300000   0.82543847
  0.65300000   0.82543894
  0.65300000   0.82543942
  0.65300000   0.82543989
  0.65300000   0.82544036
  0.65300000   0.82544083
  0.65300000   0.82544130
  0.65300000   0.82544176
  0.65350000   0.82542655
  0.65350000   0.82542705
  0.65350000   0.82542754
  0.65350000   0.82542804
  0.65350000   0.82542853
  0.65350000   0.82542903
  0.65350000   0.82542952
  0.65350000   0.82543001
  0.65350000   0.82543050
  0.65350000   0.82543099
  0.65350000   0.82543148
  0.65350000   0.82543197
  0.65350000   0.82543246
  0.65350000   0.82543294
  0.65350000   0.82543343
  0.65350000   0.82543392
  0.65350000   0.82543440
  0.65350000   0.82543488
  0.65350000   0.82543537
  0.65350000   0.82543585
  0.65350000   0.82543633
  0.65350000   0.82543681
  0.65350000   0.82543729
  0.65350000   0.82543777
  0.65350000   0.82543825
  0.65350000   0.82543872
  0.65350000   0.82543920
  0.65350000   0.82543967
  0.65350000   0.82544015
  0.65350000   0.82544062
  0.65350000   0.82544110
  0.65350000   0.82544157
  0.65350000   0.82544204
  0.65350000   0.82544251
  0.65350000   0.82544298
  0.65350000   0.82544345
  0.65350000   0.82544392
  0.65350000   0.82544439
  0.65350000   0.82544485
  0.65350000   0.82544532
  0.65400000   0.82543017
  0.65400000   0.82543066
  0.65400000   0.82543116
  0.65400000   0.82543165
  0.65400000   0.82543214
  0.65400000   0.82543263
  0.65400000   0.82543312
  0.65400000   0.82543361
  0.65400000   0.82543410
  0.65400000   0.82543459
  0.65400000   0.82543508
  0.65400000   0.82543556
  0.65400000   0.82543605
  0.65400000   0.82543653
  0.65400000   0.82543702
  0.65400000   0.82543750
  0.65400000   0.82543798
  0.65400000   0.82543847
  0.65400000   0.82543895
  0.65400000   0.82543943
  0.65400000   0.82543991
  0.65400000   0.82544038
  0.65400000   0.82544086
  0.65400000   0.82544134
  0.65400000   0.82544181
  0.65400000   0.82544229
  0.65400000   0.82544276
  0.65400000   0.82544324
  0.65400000   0.82544371
  0.65400000   0.82544418
  0.65400000   0.82544465
  0.65400000   0.82544512
  0.65400000   0.82544559
  0.65400000   0.82544606
  0.65400000   0.82544653
  0.65400000   0.82544700
  0.65400000   0.82544746
  0.65400000   0.82544793
  0.65400000   0.82544839
  0.65400000   0.82544886
  0.65450000   0.82543377
  0.65450000   0.82543426
  0.65450000   0.82543475
  0.65450000   0.82543524
  0.65450000   0.82543573
  0.65450000   0.82543622
  0.65450000   0.82543671
  0.65450000   0.82543720
  0.65450000   0.82543769
  0.65450000   0.82543817
  0.65450000   0.82543866
  0.65450000   0.82543914
  0.65450000   0.82543963
  0.65450000   0.82544011
  0.65450000   0.82544059
  0.65450000   0.82544107
  0.65450000   0.82544155
  0.65450000   0.82544203
  0.65450000   0.82544251
  0.65450000   0.82544299
  0.65450000   0.82544346
  0.65450000   0.82544394
  0.65450000   0.82544442
  0.65450000   0.82544489
  0.65450000   0.82544537
  0.65450000   0.82544584
  0.65450000   0.82544631
  0.65450000   0.82544678
  0.65450000   0.82544725
  0.65450000   0.82544772
  0.65450000   0.82544819
  0.65450000   0.82544866
  0.65450000   0.82544913
  0.65450000   0.82544959
  0.65450000   0.82545006
  0.65450000   0.82545053
  0.65450000   0.82545099
  0.65450000   0.82545145
  0.65450000   0.82545192
  0.65450000   0.82545238
  0.65500000   0.82543735
  0.65500000   0.82543784
  0.65500000   0.82543833
  0.65500000   0.82543882
  0.65500000   0.82543931
  0.65500000   0.82543980
  0.65500000   0.82544028
  0.65500000   0.82544077
  0.65500000   0.82544125
  0.65500000   0.82544174
  0.65500000   0.82544222
  0.65500000   0.82544270
  0.65500000   0.82544319
  0.65500000   0.82544367
  0.65500000   0.82544415
  0.65500000   0.82544463
  0.65500000   0.82544510
  0.65500000   0.82544558
  0.65500000   0.82544606
  0.65500000   0.82544653
  0.65500000   0.82544701
  0.65500000   0.82544748
  0.65500000   0.82544796
  0.65500000   0.82544843
  0.65500000   0.82544890
  0.65500000   0.82544937
  0.65500000   0.82544984
  0.65500000   0.82545031
  0.65500000   0.82545078
  0.65500000   0.82545125
  0.65500000   0.82545172
  0.65500000   0.82545218
  0.65500000   0.82545265
  0.65500000   0.82545311
  0.65500000   0.82545358
  0.65500000   0.82545404
  0.65500000   0.82545450
  0.65500000   0.82545496
  0.65500000   0.82545542
  0.65500000   0.82545589
  0.65550000   0.82544092
  0.65550000   0.82544141
  0.65550000   0.82544190
  0.65550000   0.82544238
  0.65550000   0.82544287
  0.65550000   0.82544336
  0.65550000   0.82544384
  0.65550000   0.82544432
  0.65550000   0.82544481
  0.65550000   0.82544529
  0.65550000   0.82544577
  0.65550000   0.82544625
  0.65550000   0.82544673
  0.65550000   0.82544721
  0.65550000   0.82544769
  0.65550000   0.82544816
  0.65550000   0.82544864
  0.65550000   0.82544911
  0.65550000   0.82544959
  0.65550000   0.82545006
  0.65550000   0.82545054
  0.65550000   0.82545101
  0.65550000   0.82545148
  0.65550000   0.82545195
  0.65550000   0.82545242
  0.65550000   0.82545289
  0.65550000   0.82545336
  0.65550000   0.82545383
  0.65550000   0.82545429
  0.65550000   0.82545476
  0.65550000   0.82545522
  0.65550000   0.82545569
  0.65550000   0.82545615
  0.65550000   0.82545661
  0.65550000   0.82545708
  0.65550000   0.82545754
  0.65550000   0.82545800
  0.65550000   0.82545846
  0.65550000   0.82545892
  0.65550000   0.82545938
  0.65600000   0.82544447
  0.65600000   0.82544496
  0.65600000   0.82544545
  0.65600000   0.82544593
  0.65600000   0.82544641
  0.65600000   0.82544690
  0.65600000   0.82544738
  0.65600000   0.82544786
  0.65600000   0.82544834
  0.65600000   0.82544882
  0.65600000   0.82544930
  0.65600000   0.82544978
  0.65600000   0.82545026
  0.65600000   0.82545073
  0.65600000   0.82545121
  0.65600000   0.82545168
  0.65600000   0.82545216
  0.65600000   0.82545263
  0.65600000   0.82545311
  0.65600000   0.82545358
  0.65600000   0.82545405
  0.65600000   0.82545452
  0.65600000   0.82545499
  0.65600000   0.82545546
  0.65600000   0.82545592
  0.65600000   0.82545639
  0.65600000   0.82545686
  0.65600000   0.82545732
  0.65600000   0.82545779
  0.65600000   0.82545825
  0.65600000   0.82545872
  0.65600000   0.82545918
  0.65600000   0.82545964
  0.65600000   0.82546010
  0.65600000   0.82546056
  0.65600000   0.82546102
  0.65600000   0.82546148
  0.65600000   0.82546194
  0.65600000   0.82546239
  0.65600000   0.82546285
  0.65650000   0.82544801
  0.65650000   0.82544849
  0.65650000   0.82544898
  0.65650000   0.82544946
  0.65650000   0.82544994
  0.65650000   0.82545042
  0.65650000   0.82545090
  0.65650000   0.82545138
  0.65650000   0.82545186
  0.65650000   0.82545234
  0.65650000   0.82545282
  0.65650000   0.82545329
  0.65650000   0.82545377
  0.65650000   0.82545424
  0.65650000   0.82545472
  0.65650000   0.82545519
  0.65650000   0.82545566
  0.65650000   0.82545613
  0.65650000   0.82545661
  0.65650000   0.82545707
  0.65650000   0.82545754
  0.65650000   0.82545801
  0.65650000   0.82545848
  0.65650000   0.82545895
  0.65650000   0.82545941
  0.65650000   0.82545988
  0.65650000   0.82546034
  0.65650000   0.82546081
  0.65650000   0.82546127
  0.65650000   0.82546173
  0.65650000   0.82546219
  0.65650000   0.82546265
  0.65650000   0.82546311
  0.65650000   0.82546357
  0.65650000   0.82546403
  0.65650000   0.82546449
  0.65650000   0.82546494
  0.65650000   0.82546540
  0.65650000   0.82546585
  0.65650000   0.82546631
  0.65700000   0.82545153
  0.65700000   0.82545201
  0.65700000   0.82545249
  0.65700000   0.82545297
  0.65700000   0.82545345
  0.65700000   0.82545393
  0.65700000   0.82545441
  0.65700000   0.82545489
  0.65700000   0.82545537
  0.65700000   0.82545584
  0.65700000   0.82545632
  0.65700000   0.82545679
  0.65700000   0.82545727
  0.65700000   0.82545774
  0.65700000   0.82545821
  0.65700000   0.82545868
  0.65700000   0.82545915
  0.65700000   0.82545962
  0.65700000   0.82546009
  0.65700000   0.82546056
  0.65700000   0.82546102
  0.65700000   0.82546149
  0.65700000   0.82546196
  0.65700000   0.82546242
  0.65700000   0.82546289
  0.65700000   0.82546335
  0.65700000   0.82546381
  0.65700000   0.82546427
  0.65700000   0.82546473
  0.65700000   0.82546519
  0.65700000   0.82546565
  0.65700000   0.82546611
  0.65700000   0.82546657
  0.65700000   0.82546703
  0.65700000   0.82546748
  0.65700000   0.82546794
  0.65700000   0.82546839
  0.65700000   0.82546885
  0.65700000   0.82546930
  0.65700000   0.82546975
  0.65750000   0.82545503
  0.65750000   0.82545551
  0.65750000   0.82545599
  0.65750000   0.82545647
  0.65750000   0.82545695
  0.65750000   0.82545743
  0.65750000   0.82545790
  0.65750000   0.82545838
  0.65750000   0.82545885
  0.65750000   0.82545933
  0.65750000   0.82545980
  0.65750000   0.82546027
  0.65750000   0.82546075
  0.65750000   0.82546122
  0.65750000   0.82546169
  0.65750000   0.82546216
  0.65750000   0.82546262
  0.65750000   0.82546309
  0.65750000   0.82546356
  0.65750000   0.82546402
  0.65750000   0.82546449
  0.65750000   0.82546495
  0.65750000   0.82546542
  0.65750000   0.82546588
  0.65750000   0.82546634
  0.65750000   0.82546680
  0.65750000   0.82546726
  0.65750000   0.82546772
  0.65750000   0.82546818
  0.65750000   0.82546864
  0.65750000   0.82546910
  0.65750000   0.82546955
  0.65750000   0.82547001
  0.65750000   0.82547047
  0.65750000   0.82547092
  0.65750000   0.82547137
  0.65750000   0.82547183
  0.65750000   0.82547228
  0.65750000   0.82547273
  0.65750000   0.82547318
  0.65800000   0.82545852
  0.65800000   0.82545900
  0.65800000   0.82545948
  0.65800000   0.82545996
  0.65800000   0.82546043
  0.65800000   0.82546091
  0.65800000   0.82546138
  0.65800000   0.82546185
  0.65800000   0.82546233
  0.65800000   0.82546280
  0.65800000   0.82546327
  0.65800000   0.82546374
  0.65800000   0.82546421
  0.65800000   0.82546468
  0.65800000   0.82546515
  0.65800000   0.82546561
  0.65800000   0.82546608
  0.65800000   0.82546655
  0.65800000   0.82546701
  0.65800000   0.82546747
  0.65800000   0.82546794
  0.65800000   0.82546840
  0.65800000   0.82546886
  0.65800000   0.82546932
  0.65800000   0.82546978
  0.65800000   0.82547024
  0.65800000   0.82547070
  0.65800000   0.82547116
  0.65800000   0.82547162
  0.65800000   0.82547207
  0.65800000   0.82547253
  0.65800000   0.82547298
  0.65800000   0.82547344
  0.65800000   0.82547389
  0.65800000   0.82547434
  0.65800000   0.82547479
  0.65800000   0.82547524
  0.65800000   0.82547569
  0.65800000   0.82547614
  0.65800000   0.82547659
  0.65850000   0.82546200
  0.65850000   0.82546247
  0.65850000   0.82546295
  0.65850000   0.82546342
  0.65850000   0.82546390
  0.65850000   0.82546437
  0.65850000   0.82546484
  0.65850000   0.82546531
  0.65850000   0.82546578
  0.65850000   0.82546625
  0.65850000   0.82546672
  0.65850000   0.82546719
  0.65850000   0.82546766
  0.65850000   0.82546813
  0.65850000   0.82546859
  0.65850000   0.82546906
  0.65850000   0.82546952
  0.65850000   0.82546999
  0.65850000   0.82547045
  0.65850000   0.82547091
  0.65850000   0.82547137
  0.65850000   0.82547183
  0.65850000   0.82547229
  0.65850000   0.82547275
  0.65850000   0.82547321
  0.65850000   0.82547367
  0.65850000   0.82547412
  0.65850000   0.82547458
  0.65850000   0.82547503
  0.65850000   0.82547549
  0.65850000   0.82547594
  0.65850000   0.82547639
  0.65850000   0.82547685
  0.65850000   0.82547730
  0.65850000   0.82547775
  0.65850000   0.82547820
  0.65850000   0.82547865
  0.65850000   0.82547910
  0.65850000   0.82547954
  0.65850000   0.82547999
  0.65900000   0.82546545
  0.65900000   0.82546593
  0.65900000   0.82546640
  0.65900000   0.82546687
  0.65900000   0.82546735
  0.65900000   0.82546782
  0.65900000   0.82546829
  0.65900000   0.82546876
  0.65900000   0.82546923
  0.65900000   0.82546969
  0.65900000   0.82547016
  0.65900000   0.82547063
  0.65900000   0.82547109
  0.65900000   0.82547156
  0.65900000   0.82547202
  0.65900000   0.82547249
  0.65900000   0.82547295
  0.65900000   0.82547341
  0.65900000   0.82547387
  0.65900000   0.82547433
  0.65900000   0.82547479
  0.65900000   0.82547525
  0.65900000   0.82547571
  0.65900000   0.82547616
  0.65900000   0.82547662
  0.65900000   0.82547707
  0.65900000   0.82547753
  0.65900000   0.82547798
  0.65900000   0.82547844
  0.65900000   0.82547889
  0.65900000   0.82547934
  0.65900000   0.82547979
  0.65900000   0.82548024
  0.65900000   0.82548069
  0.65900000   0.82548114
  0.65900000   0.82548159
  0.65900000   0.82548203
  0.65900000   0.82548248
  0.65900000   0.82548293
  0.65900000   0.82548337
  0.65950000   0.82546890
  0.65950000   0.82546937
  0.65950000   0.82546984
  0.65950000   0.82547031
  0.65950000   0.82547078
  0.65950000   0.82547125
  0.65950000   0.82547172
  0.65950000   0.82547219
  0.65950000   0.82547265
  0.65950000   0.82547312
  0.65950000   0.82547358
  0.65950000   0.82547405
  0.65950000   0.82547451
  0.65950000   0.82547497
  0.65950000   0.82547544
  0.65950000   0.82547590
  0.65950000   0.82547636
  0.65950000   0.82547682
  0.65950000   0.82547728
  0.65950000   0.82547774
  0.65950000   0.82547819
  0.65950000   0.82547865
  0.65950000   0.82547910
  0.65950000   0.82547956
  0.65950000   0.82548001
  0.65950000   0.82548047
  0.65950000   0.82548092
  0.65950000   0.82548137
  0.65950000   0.82548182
  0.65950000   0.82548227
  0.65950000   0.82548272
  0.65950000   0.82548317
  0.65950000   0.82548362
  0.65950000   0.82548407
  0.65950000   0.82548452
  0.65950000   0.82548496
  0.65950000   0.82548541
  0.65950000   0.82548585
  0.65950000   0.82548629
  0.65950000   0.82548674
  0.66000000   0.82547232
  0.66000000   0.82547279
  0.66000000   0.82547326
  0.66000000   0.82547373
  0.66000000   0.82547420
  0.66000000   0.82547467
  0.66000000   0.82547513
  0.66000000   0.82547560
  0.66000000   0.82547606
  0.66000000   0.82547653
  0.66000000   0.82547699
  0.66000000   0.82547745
  0.66000000   0.82547791
  0.66000000   0.82547838
  0.66000000   0.82547884
  0.66000000   0.82547930
  0.66000000   0.82547975
  0.66000000   0.82548021
  0.66000000   0.82548067
  0.66000000   0.82548112
  0.66000000   0.82548158
  0.66000000   0.82548203
  0.66000000   0.82548249
  0.66000000   0.82548294
  0.66000000   0.82548339
  0.66000000   0.82548385
  0.66000000   0.82548430
  0.66000000   0.82548475
  0.66000000   0.82548520
  0.66000000   0.82548564
  0.66000000   0.82548609
  0.66000000   0.82548654
  0.66000000   0.82548699
  0.66000000   0.82548743
  0.66000000   0.82548788
  0.66000000   0.82548832
  0.66000000   0.82548876
  0.66000000   0.82548921
  0.66000000   0.82548965
  0.66000000   0.82549009
  0.66050000   0.82547573
  0.66050000   0.82547620
  0.66050000   0.82547667
  0.66050000   0.82547714
  0.66050000   0.82547760
  0.66050000   0.82547807
  0.66050000   0.82547853
  0.66050000   0.82547900
  0.66050000   0.82547946
  0.66050000   0.82547992
  0.66050000   0.82548038
  0.66050000   0.82548084
  0.66050000   0.82548130
  0.66050000   0.82548176
  0.66050000   0.82548222
  0.66050000   0.82548268
  0.66050000   0.82548313
  0.66050000   0.82548359
  0.66050000   0.82548404
  0.66050000   0.82548450
  0.66050000   0.82548495
  0.66050000   0.82548540
  0.66050000   0.82548586
  0.66050000   0.82548631
  0.66050000   0.82548676
  0.66050000   0.82548721
  0.66050000   0.82548766
  0.66050000   0.82548811
  0.66050000   0.82548855
  0.66050000   0.82548900
  0.66050000   0.82548945
  0.66050000   0.82548989
  0.66050000   0.82549033
  0.66050000   0.82549078
  0.66050000   0.82549122
  0.66050000   0.82549166
  0.66050000   0.82549211
  0.66050000   0.82549255
  0.66050000   0.82549299
  0.66050000   0.82549343
  0.66100000   0.82547913
  0.66100000   0.82547960
  0.66100000   0.82548006
  0.66100000   0.82548053
  0.66100000   0.82548099
  0.66100000   0.82548145
  0.66100000   0.82548192
  0.66100000   0.82548238
  0.66100000   0.82548284
  0.66100000   0.82548330
  0.66100000   0.82548376
  0.66100000   0.82548422
  0.66100000   0.82548467
  0.66100000   0.82548513
  0.66100000   0.82548559
  0.66100000   0.82548604
  0.66100000   0.82548650
  0.66100000   0.82548695
  0.66100000   0.82548740
  0.66100000   0.82548786
  0.66100000   0.82548831
  0.66100000   0.82548876
  0.66100000   0.82548921
  0.66100000   0.82548966
  0.66100000   0.82549011
  0.66100000   0.82549056
  0.66100000   0.82549100
  0.66100000   0.82549145
  0.66100000   0.82549189
  0.66100000   0.82549234
  0.66100000   0.82549278
  0.66100000   0.82549323
  0.66100000   0.82549367
  0.66100000   0.82549411
  0.66100000   0.82549455
  0.66100000   0.82549499
  0.66100000   0.82549543
  0.66100000   0.82549587
  0.66100000   0.82549631
  0.66100000   0.82549675
  0.66150000   0.82548251
  0.66150000   0.82548297
  0.66150000   0.82548344
  0.66150000   0.82548390
  0.66150000   0.82548436
  0.66150000   0.82548482
  0.66150000   0.82548529
  0.66150000   0.82548574
  0.66150000   0.82548620
  0.66150000   0.82548666
  0.66150000   0.82548712
  0.66150000   0.82548758
  0.66150000   0.82548803
  0.66150000   0.82548849
  0.66150000   0.82548894
  0.66150000   0.82548939
  0.66150000   0.82548985
  0.66150000   0.82549030
  0.66150000   0.82549075
  0.66150000   0.82549120
  0.66150000   0.82549165
  0.66150000   0.82549210
  0.66150000   0.82549255
  0.66150000   0.82549300
  0.66150000   0.82549344
  0.66150000   0.82549389
  0.66150000   0.82549433
  0.66150000   0.82549478
  0.66150000   0.82549522
  0.66150000   0.82549566
  0.66150000   0.82549611
  0.66150000   0.82549655
  0.66150000   0.82549699
  0.66150000   0.82549743
  0.66150000   0.82549787
  0.66150000   0.82549831
  0.66150000   0.82549874
  0.66150000   0.82549918
  0.66150000   0.82549962
  0.66150000   0.82550005
  0.66200000   0.82548588
  0.66200000   0.82548634
  0.66200000   0.82548680
  0.66200000   0.82548726
  0.66200000   0.82548772
  0.66200000   0.82548818
  0.66200000   0.82548864
  0.66200000   0.82548910
  0.66200000   0.82548955
  0.66200000   0.82549001
  0.66200000   0.82549047
  0.66200000   0.82549092
  0.66200000   0.82549137
  0.66200000   0.82549183
  0.66200000   0.82549228
  0.66200000   0.82549273
  0.66200000   0.82549318
  0.66200000   0.82549363
  0.66200000   0.82549408
  0.66200000   0.82549453
  0.66200000   0.82549498
  0.66200000   0.82549542
  0.66200000   0.82549587
  0.66200000   0.82549632
  0.66200000   0.82549676
  0.66200000   0.82549720
  0.66200000   0.82549765
  0.66200000   0.82549809
  0.66200000   0.82549853
  0.66200000   0.82549897
  0.66200000   0.82549941
  0.66200000   0.82549985
  0.66200000   0.82550029
  0.66200000   0.82550073
  0.66200000   0.82550117
  0.66200000   0.82550160
  0.66200000   0.82550204
  0.66200000   0.82550248
  0.66200000   0.82550291
  0.66200000   0.82550334
  0.66250000   0.82548923
  0.66250000   0.82548969
  0.66250000   0.82549015
  0.66250000   0.82549061
  0.66250000   0.82549106
  0.66250000   0.82549152
  0.66250000   0.82549198
  0.66250000   0.82549243
  0.66250000   0.82549289
  0.66250000   0.82549334
  0.66250000   0.82549380
  0.66250000   0.82549425
  0.66250000   0.82549470
  0.66250000   0.82549515
  0.66250000   0.82549560
  0.66250000   0.82549605
  0.66250000   0.82549650
  0.66250000   0.82549695
  0.66250000   0.82549740
  0.66250000   0.82549784
  0.66250000   0.82549829
  0.66250000   0.82549873
  0.66250000   0.82549918
  0.66250000   0.82549962
  0.66250000   0.82550006
  0.66250000   0.82550051
  0.66250000   0.82550095
  0.66250000   0.82550139
  0.66250000   0.82550183
  0.66250000   0.82550227
  0.66250000   0.82550271
  0.66250000   0.82550314
  0.66250000   0.82550358
  0.66250000   0.82550402
  0.66250000   0.82550445
  0.66250000   0.82550489
  0.66250000   0.82550532
  0.66250000   0.82550576
  0.66250000   0.82550619
  0.66250000   0.82550662
  0.66300000   0.82549256
  0.66300000   0.82549302
  0.66300000   0.82549348
  0.66300000   0.82549393
  0.66300000   0.82549439
  0.66300000   0.82549485
  0.66300000   0.82549530
  0.66300000   0.82549575
  0.66300000   0.82549621
  0.66300000   0.82549666
  0.66300000   0.82549711
  0.66300000   0.82549756
  0.66300000   0.82549801
  0.66300000   0.82549846
  0.66300000   0.82549891
  0.66300000   0.82549936
  0.66300000   0.82549981
  0.66300000   0.82550025
  0.66300000   0.82550070
  0.66300000   0.82550114
  0.66300000   0.82550159
  0.66300000   0.82550203
  0.66300000   0.82550247
  0.66300000   0.82550291
  0.66300000   0.82550335
  0.66300000   0.82550379
  0.66300000   0.82550423
  0.66300000   0.82550467
  0.66300000   0.82550511
  0.66300000   0.82550555
  0.66300000   0.82550598
  0.66300000   0.82550642
  0.66300000   0.82550686
  0.66300000   0.82550729
  0.66300000   0.82550772
  0.66300000   0.82550816
  0.66300000   0.82550859
  0.66300000   0.82550902
  0.66300000   0.82550945
  0.66300000   0.82550988
  0.66350000   0.82549588
  0.66350000   0.82549634
  0.66350000   0.82549679
  0.66350000   0.82549725
  0.66350000   0.82549770
  0.66350000   0.82549816
  0.66350000   0.82549861
  0.66350000   0.82549906
  0.66350000   0.82549951
  0.66350000   0.82549996
  0.66350000   0.82550041
  0.66350000   0.82550086
  0.66350000   0.82550131
  0.66350000   0.82550176
  0.66350000   0.82550220
  0.66350000   0.82550265
  0.66350000   0.82550309
  0.66350000   0.82550354
  0.66350000   0.82550398
  0.66350000   0.82550443
  0.66350000   0.82550487
  0.66350000   0.82550531
  0.66350000   0.82550575
  0.66350000   0.82550619
  0.66350000   0.82550663
  0.66350000   0.82550707
  0.66350000   0.82550750
  0.66350000   0.82550794
  0.66350000   0.82550838
  0.66350000   0.82550881
  0.66350000   0.82550925
  0.66350000   0.82550968
  0.66350000   0.82551011
  0.66350000   0.82551055
  0.66350000   0.82551098
  0.66350000   0.82551141
  0.66350000   0.82551184
  0.66350000   0.82551227
  0.66350000   0.82551270
  0.66350000   0.82551313
  0.66400000   0.82549919
  0.66400000   0.82549964
  0.66400000   0.82550009
  0.66400000   0.82550055
  0.66400000   0.82550100
  0.66400000   0.82550145
  0.66400000   0.82550190
  0.66400000   0.82550235
  0.66400000   0.82550280
  0.66400000   0.82550325
  0.66400000   0.82550370
  0.66400000   0.82550415
  0.66400000   0.82550459
  0.66400000   0.82550504
  0.66400000   0.82550548
  0.66400000   0.82550593
  0.66400000   0.82550637
  0.66400000   0.82550681
  0.66400000   0.82550725
  0.66400000   0.82550769
  0.66400000   0.82550813
  0.66400000   0.82550857
  0.66400000   0.82550901
  0.66400000   0.82550945
  0.66400000   0.82550989
  0.66400000   0.82551032
  0.66400000   0.82551076
  0.66400000   0.82551120
  0.66400000   0.82551163
  0.66400000   0.82551206
  0.66400000   0.82551250
  0.66400000   0.82551293
  0.66400000   0.82551336
  0.66400000   0.82551379
  0.66400000   0.82551422
  0.66400000   0.82551465
  0.66400000   0.82551508
  0.66400000   0.82551551
  0.66400000   0.82551593
  0.66400000   0.82551636
  0.66450000   0.82550248
  0.66450000   0.82550293
  0.66450000   0.82550338
  0.66450000   0.82550383
  0.66450000   0.82550428
  0.66450000   0.82550473
  0.66450000   0.82550518
  0.66450000   0.82550563
  0.66450000   0.82550608
  0.66450000   0.82550652
  0.66450000   0.82550697
  0.66450000   0.82550741
  0.66450000   0.82550786
  0.66450000   0.82550830
  0.66450000   0.82550875
  0.66450000   0.82550919
  0.66450000   0.82550963
  0.66450000   0.82551007
  0.66450000   0.82551051
  0.66450000   0.82551095
  0.66450000   0.82551139
  0.66450000   0.82551182
  0.66450000   0.82551226
  0.66450000   0.82551270
  0.66450000   0.82551313
  0.66450000   0.82551357
  0.66450000   0.82551400
  0.66450000   0.82551443
  0.66450000   0.82551487
  0.66450000   0.82551530
  0.66450000   0.82551573
  0.66450000   0.82551616
  0.66450000   0.82551659
  0.66450000   0.82551702
  0.66450000   0.82551745
  0.66450000   0.82551787
  0.66450000   0.82551830
  0.66450000   0.82551873
  0.66450000   0.82551915
  0.66450000   0.82551958
  0.66500000   0.82550575
  0.66500000   0.82550620
  0.66500000   0.82550665
  0.66500000   0.82550710
  0.66500000   0.82550755
  0.66500000   0.82550800
  0.66500000   0.82550845
  0.66500000   0.82550889
  0.66500000   0.82550934
  0.66500000   0.82550978
  0.66500000   0.82551023
  0.66500000   0.82551067
  0.66500000   0.82551111
  0.66500000   0.82551155
  0.66500000   0.82551199
  0.66500000   0.82551243
  0.66500000   0.82551287
  0.66500000   0.82551331
  0.66500000   0.82551375
  0.66500000   0.82551419
  0.66500000   0.82551462
  0.66500000   0.82551506
  0.66500000   0.82551550
  0.66500000   0.82551593
  0.66500000   0.82551636
  0.66500000   0.82551680
  0.66500000   0.82551723
  0.66500000   0.82551766
  0.66500000   0.82551809
  0.66500000   0.82551852
  0.66500000   0.82551895
  0.66500000   0.82551938
  0.66500000   0.82551981
  0.66500000   0.82552023
  0.66500000   0.82552066
  0.66500000   0.82552108
  0.66500000   0.82552151
  0.66500000   0.82552193
  0.66500000   0.82552236
  0.66500000   0.82552278
  0.66550000   0.82550901
  0.66550000   0.82550946
  0.66550000   0.82550991
  0.66550000   0.82551036
  0.66550000   0.82551080
  0.66550000   0.82551125
  0.66550000   0.82551170
  0.66550000   0.82551214
  0.66550000   0.82551258
  0.66550000   0.82551303
  0.66550000   0.82551347
  0.66550000   0.82551391
  0.66550000   0.82551435
  0.66550000   0.82551479
  0.66550000   0.82551523
  0.66550000   0.82551567
  0.66550000   0.82551610
  0.66550000   0.82551654
  0.66550000   0.82551698
  0.66550000   0.82551741
  0.66550000   0.82551785
  0.66550000   0.82551828
  0.66550000   0.82551871
  0.66550000   0.82551915
  0.66550000   0.82551958
  0.66550000   0.82552001
  0.66550000   0.82552044
  0.66550000   0.82552087
  0.66550000   0.82552130
  0.66550000   0.82552173
  0.66550000   0.82552215
  0.66550000   0.82552258
  0.66550000   0.82552301
  0.66550000   0.82552343
  0.66550000   0.82552386
  0.66550000   0.82552428
  0.66550000   0.82552470
  0.66550000   0.82552513
  0.66550000   0.82552555
  0.66550000   0.82552597
  0.66600000   0.82551226
  0.66600000   0.82551271
  0.66600000   0.82551315
  0.66600000   0.82551360
  0.66600000   0.82551404
  0.66600000   0.82551449
  0.66600000   0.82551493
  0.66600000   0.82551537
  0.66600000   0.82551581
  0.66600000   0.82551625
  0.66600000   0.82551670
  0.66600000   0.82551713
  0.66600000   0.82551757
  0.66600000   0.82551801
  0.66600000   0.82551845
  0.66600000   0.82551888
  0.66600000   0.82551932
  0.66600000   0.82551976
  0.66600000   0.82552019
  0.66600000   0.82552062
  0.66600000   0.82552106
  0.66600000   0.82552149
  0.66600000   0.82552192
  0.66600000   0.82552235
  0.66600000   0.82552278
  0.66600000   0.82552321
  0.66600000   0.82552364
  0.66600000   0.82552406
  0.66600000   0.82552449
  0.66600000   0.82552492
  0.66600000   0.82552534
  0.66600000   0.82552577
  0.66600000   0.82552619
  0.66600000   0.82552662
  0.66600000   0.82552704
  0.66600000   0.82552746
  0.66600000   0.82552788
  0.66600000   0.82552830
  0.66600000   0.82552872
  0.66600000   0.82552914
  0.66650000   0.82551549
  0.66650000   0.82551594
  0.66650000   0.82551638
  0.66650000   0.82551682
  0.66650000   0.82551727
  0.66650000   0.82551771
  0.66650000   0.82551815
  0.66650000   0.82551859
  0.66650000   0.82551903
  0.66650000   0.82551947
  0.66650000   0.82551991
  0.66650000   0.82552035
  0.66650000   0.82552078
  0.66650000   0.82552122
  0.66650000   0.82552165
  0.66650000   0.82552209
  0.66650000   0.82552252
  0.66650000   0.82552295
  0.66650000   0.82552339
  0.66650000   0.82552382
  0.66650000   0.82552425
  0.66650000   0.82552468
  0.66650000   0.82552511
  0.66650000   0.82552554
  0.66650000   0.82552597
  0.66650000   0.82552639
  0.66650000   0.82552682
  0.66650000   0.82552725
  0.66650000   0.82552767
  0.66650000   0.82552810
  0.66650000   0.82552852
  0.66650000   0.82552894
  0.66650000   0.82552936
  0.66650000   0.82552979
  0.66650000   0.82553021
  0.66650000   0.82553063
  0.66650000   0.82553105
  0.66650000   0.82553147
  0.66650000   0.82553188
  0.66650000   0.82553230
  0.66700000   0.82551871
  0.66700000   0.82551915
  0.66700000   0.82551959
  0.66700000   0.82552003
  0.66700000   0.82552048
  0.66700000   0.82552092
  0.66700000   0.82552136
  0.66700000   0.82552179
  0.66700000   0.82552223
  0.66700000   0.82552267
  0.66700000   0.82552311
  0.66700000   0.82552354
  0.66700000   0.82552398
  0.66700000   0.82552441
  0.66700000   0.82552484
  0.66700000   0.82552528
  0.66700000   0.82552571
  0.66700000   0.82552614
  0.66700000   0.82552657
  0.66700000   0.82552700
  0.66700000   0.82552743
  0.66700000   0.82552786
  0.66700000   0.82552829
  0.66700000   0.82552871
  0.66700000   0.82552914
  0.66700000   0.82552956
  0.66700000   0.82552999
  0.66700000   0.82553041
  0.66700000   0.82553084
  0.66700000   0.82553126
  0.66700000   0.82553168
  0.66700000   0.82553210
  0.66700000   0.82553252
  0.66700000   0.82553294
  0.66700000   0.82553336
  0.66700000   0.82553378
  0.66700000   0.82553420
  0.66700000   0.82553461
  0.66700000   0.82553503
  0.66700000   0.82553545
  0.66750000   0.82552191
  0.66750000   0.82552235
  0.66750000   0.82552279
  0.66750000   0.82552323
  0.66750000   0.82552367
  0.66750000   0.82552411
  0.66750000   0.82552455
  0.66750000   0.82552498
  0.66750000   0.82552542
  0.66750000   0.82552585
  0.66750000   0.82552629
  0.66750000   0.82552672
  0.66750000   0.82552716
  0.66750000   0.82552759
  0.66750000   0.82552802
  0.66750000   0.82552845
  0.66750000   0.82552888
  0.66750000   0.82552931
  0.66750000   0.82552974
  0.66750000   0.82553017
  0.66750000   0.82553059
  0.66750000   0.82553102
  0.66750000   0.82553145
  0.66750000   0.82553187
  0.66750000   0.82553230
  0.66750000   0.82553272
  0.66750000   0.82553314
  0.66750000   0.82553357
  0.66750000   0.82553399
  0.66750000   0.82553441
  0.66750000   0.82553483
  0.66750000   0.82553525
  0.66750000   0.82553567
  0.66750000   0.82553608
  0.66750000   0.82553650
  0.66750000   0.82553692
  0.66750000   0.82553733
  0.66750000   0.82553775
  0.66750000   0.82553816
  0.66750000   0.82553858
  0.66800000   0.82552510
  0.66800000   0.82552554
  0.66800000   0.82552598
  0.66800000   0.82552641
  0.66800000   0.82552685
  0.66800000   0.82552729
  0.66800000   0.82552772
  0.66800000   0.82552816
  0.66800000   0.82552859
  0.66800000   0.82552903
  0.66800000   0.82552946
  0.66800000   0.82552989
  0.66800000   0.82553032
  0.66800000   0.82553075
  0.66800000   0.82553118
  0.66800000   0.82553161
  0.66800000   0.82553204
  0.66800000   0.82553247
  0.66800000   0.82553289
  0.66800000   0.82553332
  0.66800000   0.82553375
  0.66800000   0.82553417
  0.66800000   0.82553459
  0.66800000   0.82553502
  0.66800000   0.82553544
  0.66800000   0.82553586
  0.66800000   0.82553628
  0.66800000   0.82553670
  0.66800000   0.82553712
  0.66800000   0.82553754
  0.66800000   0.82553796
  0.66800000   0.82553838
  0.66800000   0.82553879
  0.66800000   0.82553921
  0.66800000   0.82553963
  0.66800000   0.82554004
  0.66800000   0.82554046
  0.66800000   0.82554087
  0.66800000   0.82554128
  0.66800000   0.82554169
  0.66850000   0.82552827
  0.66850000   0.82552871
  0.66850000   0.82552914
  0.66850000   0.82552958
  0.66850000   0.82553002
  0.66850000   0.82553045
  0.66850000   0.82553088
  0.66850000   0.82553132
  0.66850000   0.82553175
  0.66850000   0.82553218
  0.66850000   0.82553261
  0.66850000   0.82553304
  0.66850000   0.82553347
  0.66850000   0.82553390
  0.66850000   0.82553433
  0.66850000   0.82553476
  0.66850000   0.82553518
  0.66850000   0.82553561
  0.66850000   0.82553603
  0.66850000   0.82553646
  0.66850000   0.82553688
  0.66850000   0.82553730
  0.66850000   0.82553773
  0.66850000   0.82553815
  0.66850000   0.82553857
  0.66850000   0.82553899
  0.66850000   0.82553941
  0.66850000   0.82553983
  0.66850000   0.82554024
  0.66850000   0.82554066
  0.66850000   0.82554108
  0.66850000   0.82554149
  0.66850000   0.82554191
  0.66850000   0.82554232
  0.66850000   0.82554274
  0.66850000   0.82554315
  0.66850000   0.82554356
  0.66850000   0.82554397
  0.66850000   0.82554439
  0.66850000   0.82554480
  0.66900000   0.82553143
  0.66900000   0.82553187
  0.66900000   0.82553230
  0.66900000   0.82553273
  0.66900000   0.82553317
  0.66900000   0.82553360
  0.66900000   0.82553403
  0.66900000   0.82553446
  0.66900000   0.82553489
  0.66900000   0.82553532
  0.66900000   0.82553575
  0.66900000   0.82553618
  0.66900000   0.82553661
  0.66900000   0.82553704
  0.66900000   0.82553746
  0.66900000   0.82553789
  0.66900000   0.82553831
  0.66900000   0.82553874
  0.66900000   0.82553916
  0.66900000   0.82553958
  0.66900000   0.82554000
  0.66900000   0.82554043
  0.66900000   0.82554085
  0.66900000   0.82554127
  0.66900000   0.82554168
  0.66900000   0.82554210
  0.66900000   0.82554252
  0.66900000   0.82554294
  0.66900000   0.82554335
  0.66900000   0.82554377
  0.66900000   0.82554418
  0.66900000   0.82554460
  0.66900000   0.82554501
  0.66900000   0.82554542
  0.66900000   0.82554583
  0.66900000   0.82554625
  0.66900000   0.82554666
  0.66900000   0.82554707
  0.66900000   0.82554748
  0.66900000   0.82554788
  0.66950000   0.82553457
  0.66950000   0.82553501
  0.66950000   0.82553544
  0.66950000   0.82553587
  0.66950000   0.82553631
  0.66950000   0.82553674
  0.66950000   0.82553717
  0.66950000   0.82553760
  0.66950000   0.82553802
  0.66950000   0.82553845
  0.66950000   0.82553888
  0.66950000   0.82553931
  0.66950000   0.82553973
  0.66950000   0.82554016
  0.66950000   0.82554058
  0.66950000   0.82554101
  0.66950000   0.82554143
  0.66950000   0.82554185
  0.66950000   0.82554227
  0.66950000   0.82554269
  0.66950000   0.82554311
  0.66950000   0.82554353
  0.66950000   0.82554395
  0.66950000   0.82554437
  0.66950000   0.82554479
  0.66950000   0.82554520
  0.66950000   0.82554562
  0.66950000   0.82554603
  0.66950000   0.82554645
  0.66950000   0.82554686
  0.66950000   0.82554727
  0.66950000   0.82554769
  0.66950000   0.82554810
  0.66950000   0.82554851
  0.66950000   0.82554892
  0.66950000   0.82554933
  0.66950000   0.82554974
  0.66950000   0.82555014
  0.66950000   0.82555055
  0.66950000   0.82555096
  0.67000000   0.82553770
  0.67000000   0.82553814
  0.67000000   0.82553857
  0.67000000   0.82553900
  0.67000000   0.82553943
  0.67000000   0.82553986
  0.67000000   0.82554029
  0.67000000   0.82554071
  0.67000000   0.82554114
  0.67000000   0.82554157
  0.67000000   0.82554199
  0.67000000   0.82554242
  0.67000000   0.82554284
  0.67000000   0.82554326
  0.67000000   0.82554369
  0.67000000   0.82554411
  0.67000000   0.82554453
  0.67000000   0.82554495
  0.67000000   0.82554537
  0.67000000   0.82554579
  0.67000000   0.82554621
  0.67000000   0.82554662
  0.67000000   0.82554704
  0.67000000   0.82554746
  0.67000000   0.82554787
  0.67000000   0.82554829
  0.67000000   0.82554870
  0.67000000   0.82554911
  0.67000000   0.82554953
  0.67000000   0.82554994
  0.67000000   0.82555035
  0.67000000   0.82555076
  0.67000000   0.82555117
  0.67000000   0.82555158
  0.67000000   0.82555199
  0.67000000   0.82555240
  0.67000000   0.82555280
  0.67000000   0.82555321
  0.67000000   0.82555361
  0.67000000   0.82555402
  0.67050000   0.82554082
  0.67050000   0.82554125
  0.67050000   0.82554168
  0.67050000   0.82554211
  0.67050000   0.82554254
  0.67050000   0.82554297
  0.67050000   0.82554339
  0.67050000   0.82554382
  0.67050000   0.82554424
  0.67050000   0.82554467
  0.67050000   0.82554509
  0.67050000   0.82554551
  0.67050000   0.82554594
  0.67050000   0.82554636
  0.67050000   0.82554678
  0.67050000   0.82554720
  0.67050000   0.82554762
  0.67050000   0.82554804
  0.67050000   0.82554845
  0.67050000   0.82554887
  0.67050000   0.82554929
  0.67050000   0.82554970
  0.67050000   0.82555012
  0.67050000   0.82555053
  0.67050000   0.82555095
  0.67050000   0.82555136
  0.67050000   0.82555177
  0.67050000   0.82555218
  0.67050000   0.82555259
  0.67050000   0.82555300
  0.67050000   0.82555341
  0.67050000   0.82555382
  0.67050000   0.82555423
  0.67050000   0.82555464
  0.67050000   0.82555504
  0.67050000   0.82555545
  0.67050000   0.82555585
  0.67050000   0.82555626
  0.67050000   0.82555666
  0.67050000   0.82555707
  0.67100000   0.82554392
  0.67100000   0.82554435
  0.67100000   0.82554478
  0.67100000   0.82554521
  0.67100000   0.82554563
  0.67100000   0.82554606
  0.67100000   0.82554648
  0.67100000   0.82554691
  0.67100000   0.82554733
  0.67100000   0.82554775
  0.67100000   0.82554817
  0.67100000   0.82554860
  0.67100000   0.82554902
  0.67100000   0.82554944
  0.67100000   0.82554985
  0.67100000   0.82555027
  0.67100000   0.82555069
  0.67100000   0.82555111
  0.67100000   0.82555152
  0.67100000   0.82555194
  0.67100000   0.82555235
  0.67100000   0.82555277
  0.67100000   0.82555318
  0.67100000   0.82555359
  0.67100000   0.82555400
  0.67100000   0.82555442
  0.67100000   0.82555483
  0.67100000   0.82555524
  0.67100000   0.82555564
  0.67100000   0.82555605
  0.67100000   0.82555646
  0.67100000   0.82555687
  0.67100000   0.82555727
  0.67100000   0.82555768
  0.67100000   0.82555808
  0.67100000   0.82555849
  0.67100000   0.82555889
  0.67100000   0.82555929
  0.67100000   0.82555970
  0.67100000   0.82556010
  0.67150000   0.82554701
  0.67150000   0.82554744
  0.67150000   0.82554786
  0.67150000   0.82554829
  0.67150000   0.82554871
  0.67150000   0.82554914
  0.67150000   0.82554956
  0.67150000   0.82554998
  0.67150000   0.82555040
  0.67150000   0.82555082
  0.67150000   0.82555124
  0.67150000   0.82555166
  0.67150000   0.82555208
  0.67150000   0.82555250
  0.67150000   0.82555292
  0.67150000   0.82555333
  0.67150000   0.82555375
  0.67150000   0.82555416
  0.67150000   0.82555458
  0.67150000   0.82555499
  0.67150000   0.82555540
  0.67150000   0.82555582
  0.67150000   0.82555623
  0.67150000   0.82555664
  0.67150000   0.82555705
  0.67150000   0.82555746
  0.67150000   0.82555787
  0.67150000   0.82555828
  0.67150000   0.82555868
  0.67150000   0.82555909
  0.67150000   0.82555949
  0.67150000   0.82555990
  0.67150000   0.82556030
  0.67150000   0.82556071
  0.67150000   0.82556111
  0.67150000   0.82556151
  0.67150000   0.82556192
  0.67150000   0.82556232
  0.67150000   0.82556272
  0.67150000   0.82556312
  0.67200000   0.82555009
  0.67200000   0.82555051
  0.67200000   0.82555094
  0.67200000   0.82555136
  0.67200000   0.82555178
  0.67200000   0.82555220
  0.67200000   0.82555262
  0.67200000   0.82555304
  0.67200000   0.82555346
  0.67200000   0.82555388
  0.67200000   0.82555430
  0.67200000   0.82555472
  0.67200000   0.82555514
  0.67200000   0.82555555
  0.67200000   0.82555597
  0.67200000   0.82555638
  0.67200000   0.82555679
  0.67200000   0.82555721
  0.67200000   0.82555762
  0.67200000   0.82555803
  0.67200000   0.82555844
  0.67200000   0.82555885
  0.67200000   0.82555926
  0.67200000   0.82555967
  0.67200000   0.82556008
  0.67200000   0.82556049
  0.67200000   0.82556090
  0.67200000   0.82556130
  0.67200000   0.82556171
  0.67200000   0.82556211
  0.67200000   0.82556252
  0.67200000   0.82556292
  0.67200000   0.82556332
  0.67200000   0.82556372
  0.67200000   0.82556413
  0.67200000   0.82556453
  0.67200000   0.82556493
  0.67200000   0.82556533
  0.67200000   0.82556572
  0.67200000   0.82556612
  0.67250000   0.82555315
  0.67250000   0.82555357
  0.67250000   0.82555399
  0.67250000   0.82555441
  0.67250000   0.82555483
  0.67250000   0.82555525
  0.67250000   0.82555567
  0.67250000   0.82555609
  0.67250000   0.82555651
  0.67250000   0.82555693
  0.67250000   0.82555734
  0.67250000   0.82555776
  0.67250000   0.82555817
  0.67250000   0.82555859
  0.67250000   0.82555900
  0.67250000   0.82555941
  0.67250000   0.82555983
  0.67250000   0.82556024
  0.67250000   0.82556065
  0.67250000   0.82556106
  0.67250000   0.82556147
  0.67250000   0.82556188
  0.67250000   0.82556228
  0.67250000   0.82556269
  0.67250000   0.82556310
  0.67250000   0.82556350
  0.67250000   0.82556391
  0.67250000   0.82556431
  0.67250000   0.82556472
  0.67250000   0.82556512
  0.67250000   0.82556552
  0.67250000   0.82556592
  0.67250000   0.82556633
  0.67250000   0.82556673
  0.67250000   0.82556713
  0.67250000   0.82556752
  0.67250000   0.82556792
  0.67250000   0.82556832
  0.67250000   0.82556872
  0.67250000   0.82556911
  0.67300000   0.82555619
  0.67300000   0.82555661
  0.67300000   0.82555704
  0.67300000   0.82555745
  0.67300000   0.82555787
  0.67300000   0.82555829
  0.67300000   0.82555871
  0.67300000   0.82555913
  0.67300000   0.82555954
  0.67300000   0.82555996
  0.67300000   0.82556037
  0.67300000   0.82556079
  0.67300000   0.82556120
  0.67300000   0.82556161
  0.67300000   0.82556202
  0.67300000   0.82556243
  0.67300000   0.82556284
  0.67300000   0.82556325
  0.67300000   0.82556366
  0.67300000   0.82556407
  0.67300000   0.82556448
  0.67300000   0.82556489
  0.67300000   0.82556529
  0.67300000   0.82556570
  0.67300000   0.82556610
  0.67300000   0.82556651
  0.67300000   0.82556691
  0.67300000   0.82556731
  0.67300000   0.82556771
  0.67300000   0.82556812
  0.67300000   0.82556852
  0.67300000   0.82556892
  0.67300000   0.82556932
  0.67300000   0.82556971
  0.67300000   0.82557011
  0.67300000   0.82557051
  0.67300000   0.82557091
  0.67300000   0.82557130
  0.67300000   0.82557170
  0.67300000   0.82557209
  0.67350000   0.82555923
  0.67350000   0.82555965
  0.67350000   0.82556006
  0.67350000   0.82556048
  0.67350000   0.82556090
  0.67350000   0.82556132
  0.67350000   0.82556173
  0.67350000   0.82556215
  0.67350000   0.82556256
  0.67350000   0.82556297
  0.67350000   0.82556339
  0.67350000   0.82556380
  0.67350000   0.82556421
  0.67350000   0.82556462
  0.67350000   0.82556503
  0.67350000   0.82556544
  0.67350000   0.82556585
  0.67350000   0.82556626
  0.67350000   0.82556666
  0.67350000   0.82556707
  0.67350000   0.82556748
  0.67350000   0.82556788
  0.67350000   0.82556829
  0.67350000   0.82556869
  0.67350000   0.82556909
  0.67350000   0.82556949
  0.67350000   0.82556990
  0.67350000   0.82557030
  0.67350000   0.82557070
  0.67350000   0.82557110
  0.67350000   0.82557150
  0.67350000   0.82557189
  0.67350000   0.82557229
  0.67350000   0.82557269
  0.67350000   0.82557309
  0.67350000   0.82557348
  0.67350000   0.82557388
  0.67350000   0.82557427
  0.67350000   0.82557466
  0.67350000   0.82557506
  0.67400000   0.82556225
  0.67400000   0.82556266
  0.67400000   0.82556308
  0.67400000   0.82556350
  0.67400000   0.82556391
  0.67400000   0.82556433
  0.67400000   0.82556474
  0.67400000   0.82556515
  0.67400000   0.82556557
  0.67400000   0.82556598
  0.67400000   0.82556639
  0.67400000   0.82556680
  0.67400000   0.82556721
  0.67400000   0.82556762
  0.67400000   0.82556803
  0.67400000   0.82556843
  0.67400000   0.82556884
  0.67400000   0.82556925
  0.67400000   0.82556965
  0.67400000   0.82557006
  0.67400000   0.82557046
  0.67400000   0.82557086
  0.67400000   0.82557127
  0.67400000   0.82557167
  0.67400000   0.82557207
  0.67400000   0.82557247
  0.67400000   0.82557287
  0.67400000   0.82557327
  0.67400000   0.82557367
  0.67400000   0.82557407
  0.67400000   0.82557446
  0.67400000   0.82557486
  0.67400000   0.82557526
  0.67400000   0.82557565
  0.67400000   0.82557604
  0.67400000   0.82557644
  0.67400000   0.82557683
  0.67400000   0.82557722
  0.67400000   0.82557762
  0.67400000   0.82557801
  0.67450000   0.82556525
  0.67450000   0.82556567
  0.67450000   0.82556608
  0.67450000   0.82556650
  0.67450000   0.82556691
  0.67450000   0.82556732
  0.67450000   0.82556773
  0.67450000   0.82556815
  0.67450000   0.82556856
  0.67450000   0.82556897
  0.67450000   0.82556938
  0.67450000   0.82556978
  0.67450000   0.82557019
  0.67450000   0.82557060
  0.67450000   0.82557101
  0.67450000   0.82557141
  0.67450000   0.82557182
  0.67450000   0.82557222
  0.67450000   0.82557262
  0.67450000   0.82557303
  0.67450000   0.82557343
  0.67450000   0.82557383
  0.67450000   0.82557423
  0.67450000   0.82557463
  0.67450000   0.82557503
  0.67450000   0.82557543
  0.67450000   0.82557583
  0.67450000   0.82557623
  0.67450000   0.82557662
  0.67450000   0.82557702
  0.67450000   0.82557742
  0.67450000   0.82557781
  0.67450000   0.82557820
  0.67450000   0.82557860
  0.67450000   0.82557899
  0.67450000   0.82557938
  0.67450000   0.82557977
  0.67450000   0.82558017
  0.67450000   0.82558056
  0.67450000   0.82558095
  0.67500000   0.82556824
  0.67500000   0.82556866
  0.67500000   0.82556907
  0.67500000   0.82556948
  0.67500000   0.82556989
  0.67500000   0.82557031
  0.67500000   0.82557072
  0.67500000   0.82557113
  0.67500000   0.82557153
  0.67500000   0.82557194
  0.67500000   0.82557235
  0.67500000   0.82557276
  0.67500000   0.82557316
  0.67500000   0.82557357
  0.67500000   0.82557397
  0.67500000   0.82557438
  0.67500000   0.82557478
  0.67500000   0.82557518
  0.67500000   0.82557558
  0.67500000   0.82557599
  0.67500000   0.82557639
  0.67500000   0.82557679
  0.67500000   0.82557719
  0.67500000   0.82557758
  0.67500000   0.82557798
  0.67500000   0.82557838
  0.67500000   0.82557878
  0.67500000   0.82557917
  0.67500000   0.82557957
  0.67500000   0.82557996
  0.67500000   0.82558035
  0.67500000   0.82558075
  0.67500000   0.82558114
  0.67500000   0.82558153
  0.67500000   0.82558192
  0.67500000   0.82558231
  0.67500000   0.82558270
  0.67500000   0.82558309
  0.67500000   0.82558348
  0.67500000   0.82558387
  0.67550000   0.82557122
  0.67550000   0.82557163
  0.67550000   0.82557204
  0.67550000   0.82557246
  0.67550000   0.82557287
  0.67550000   0.82557327
  0.67550000   0.82557368
  0.67550000   0.82557409
  0.67550000   0.82557450
  0.67550000   0.82557490
  0.67550000   0.82557531
  0.67550000   0.82557572
  0.67550000   0.82557612
  0.67550000   0.82557652
  0.67550000   0.82557693
  0.67550000   0.82557733
  0.67550000   0.82557773
  0.67550000   0.82557813
  0.67550000   0.82557853
  0.67550000   0.82557893
  0.67550000   0.82557933
  0.67550000   0.82557973
  0.67550000   0.82558013
  0.67550000   0.82558052
  0.67550000   0.82558092
  0.67550000   0.82558131
  0.67550000   0.82558171
  0.67550000   0.82558210
  0.67550000   0.82558250
  0.67550000   0.82558289
  0.67550000   0.82558328
  0.67550000   0.82558367
  0.67550000   0.82558406
  0.67550000   0.82558445
  0.67550000   0.82558484
  0.67550000   0.82558523
  0.67550000   0.82558562
  0.67550000   0.82558601
  0.67550000   0.82558639
  0.67550000   0.82558678
  0.67600000   0.82557419
  0.67600000   0.82557460
  0.67600000   0.82557501
  0.67600000   0.82557541
  0.67600000   0.82557582
  0.67600000   0.82557623
  0.67600000   0.82557664
  0.67600000   0.82557704
  0.67600000   0.82557745
  0.67600000   0.82557785
  0.67600000   0.82557826
  0.67600000   0.82557866
  0.67600000   0.82557906
  0.67600000   0.82557947
  0.67600000   0.82557987
  0.67600000   0.82558027
  0.67600000   0.82558067
  0.67600000   0.82558107
  0.67600000   0.82558146
  0.67600000   0.82558186
  0.67600000   0.82558226
  0.67600000   0.82558266
  0.67600000   0.82558305
  0.67600000   0.82558345
  0.67600000   0.82558384
  0.67600000   0.82558423
  0.67600000   0.82558463
  0.67600000   0.82558502
  0.67600000   0.82558541
  0.67600000   0.82558580
  0.67600000   0.82558619
  0.67600000   0.82558658
  0.67600000   0.82558697
  0.67600000   0.82558736
  0.67600000   0.82558775
  0.67600000   0.82558814
  0.67600000   0.82558852
  0.67600000   0.82558891
  0.67600000   0.82558929
  0.67600000   0.82558968
  0.67650000   0.82557714
  0.67650000   0.82557755
  0.67650000   0.82557795
  0.67650000   0.82557836
  0.67650000   0.82557877
  0.67650000   0.82557917
  0.67650000   0.82557958
  0.67650000   0.82557998
  0.67650000   0.82558039
  0.67650000   0.82558079
  0.67650000   0.82558119
  0.67650000   0.82558159
  0.67650000   0.82558199
  0.67650000   0.82558239
  0.67650000   0.82558279
  0.67650000   0.82558319
  0.67650000   0.82558359
  0.67650000   0.82558399
  0.67650000   0.82558438
  0.67650000   0.82558478
  0.67650000   0.82558518
  0.67650000   0.82558557
  0.67650000   0.82558596
  0.67650000   0.82558636
  0.67650000   0.82558675
  0.67650000   0.82558714
  0.67650000   0.82558753
  0.67650000   0.82558792
  0.67650000   0.82558831
  0.67650000   0.82558870
  0.67650000   0.82558909
  0.67650000   0.82558948
  0.67650000   0.82558987
  0.67650000   0.82559026
  0.67650000   0.82559064
  0.67650000   0.82559103
  0.67650000   0.82559141
  0.67650000   0.82559180
  0.67650000   0.82559218
  0.67650000   0.82559256
  0.67700000   0.82558008
  0.67700000   0.82558048
  0.67700000   0.82558089
  0.67700000   0.82558129
  0.67700000   0.82558170
  0.67700000   0.82558210
  0.67700000   0.82558251
  0.67700000   0.82558291
  0.67700000   0.82558331
  0.67700000   0.82558371
  0.67700000   0.82558411
  0.67700000   0.82558451
  0.67700000   0.82558491
  0.67700000   0.82558531
  0.67700000   0.82558571
  0.67700000   0.82558610
  0.67700000   0.82558650
  0.67700000   0.82558690
  0.67700000   0.82558729
  0.67700000   0.82558769
  0.67700000   0.82558808
  0.67700000   0.82558847
  0.67700000   0.82558886
  0.67700000   0.82558926
  0.67700000   0.82558965
  0.67700000   0.82559004
  0.67700000   0.82559043
  0.67700000   0.82559082
  0.67700000   0.82559120
  0.67700000   0.82559159
  0.67700000   0.82559198
  0.67700000   0.82559237
  0.67700000   0.82559275
  0.67700000   0.82559314
  0.67700000   0.82559352
  0.67700000   0.82559390
  0.67700000   0.82559429
  0.67700000   0.82559467
  0.67700000   0.82559505
  0.67700000   0.82559543
  0.67750000   0.82558300
  0.67750000   0.82558341
  0.67750000   0.82558381
  0.67750000   0.82558421
  0.67750000   0.82558462
  0.67750000   0.82558502
  0.67750000   0.82558542
  0.67750000   0.82558582
  0.67750000   0.82558622
  0.67750000   0.82558662
  0.67750000   0.82558702
  0.67750000   0.82558742
  0.67750000   0.82558781
  0.67750000   0.82558821
  0.67750000   0.82558861
  0.67750000   0.82558900
  0.67750000   0.82558940
  0.67750000   0.82558979
  0.67750000   0.82559018
  0.67750000   0.82559058
  0.67750000   0.82559097
  0.67750000   0.82559136
  0.67750000   0.82559175
  0.67750000   0.82559214
  0.67750000   0.82559253
  0.67750000   0.82559292
  0.67750000   0.82559331
  0.67750000   0.82559369
  0.67750000   0.82559408
  0.67750000   0.82559447
  0.67750000   0.82559485
  0.67750000   0.82559524
  0.67750000   0.82559562
  0.67750000   0.82559600
  0.67750000   0.82559639
  0.67750000   0.82559677
  0.67750000   0.82559715
  0.67750000   0.82559753
  0.67750000   0.82559791
  0.67750000   0.82559829
  0.67800000   0.82558591
  0.67800000   0.82558631
  0.67800000   0.82558672
  0.67800000   0.82558712
  0.67800000   0.82558752
  0.67800000   0.82558792
  0.67800000   0.82558832
  0.67800000   0.82558872
  0.67800000   0.82558912
  0.67800000   0.82558952
  0.67800000   0.82558991
  0.67800000   0.82559031
  0.67800000   0.82559070
  0.67800000   0.82559110
  0.67800000   0.82559149
  0.67800000   0.82559189
  0.67800000   0.82559228
  0.67800000   0.82559267
  0.67800000   0.82559306
  0.67800000   0.82559346
  0.67800000   0.82559385
  0.67800000   0.82559424
  0.67800000   0.82559462
  0.67800000   0.82559501
  0.67800000   0.82559540
  0.67800000   0.82559579
  0.67800000   0.82559617
  0.67800000   0.82559656
  0.67800000   0.82559694
  0.67800000   0.82559733
  0.67800000   0.82559771
  0.67800000   0.82559810
  0.67800000   0.82559848
  0.67800000   0.82559886
  0.67800000   0.82559924
  0.67800000   0.82559962
  0.67800000   0.82560000
  0.67800000   0.82560038
  0.67800000   0.82560076
  0.67800000   0.82560114
  0.67850000   0.82558881
  0.67850000   0.82558921
  0.67850000   0.82558961
  0.67850000   0.82559001
  0.67850000   0.82559041
  0.67850000   0.82559081
  0.67850000   0.82559121
  0.67850000   0.82559161
  0.67850000   0.82559200
  0.67850000   0.82559240
  0.67850000   0.82559279
  0.67850000   0.82559319
  0.67850000   0.82559358
  0.67850000   0.82559398
  0.67850000   0.82559437
  0.67850000   0.82559476
  0.67850000   0.82559515
  0.67850000   0.82559554
  0.67850000   0.82559593
  0.67850000   0.82559632
  0.67850000   0.82559671
  0.67850000   0.82559710
  0.67850000   0.82559749
  0.67850000   0.82559787
  0.67850000   0.82559826
  0.67850000   0.82559864
  0.67850000   0.82559903
  0.67850000   0.82559941
  0.67850000   0.82559979
  0.67850000   0.82560018
  0.67850000   0.82560056
  0.67850000   0.82560094
  0.67850000   0.82560132
  0.67850000   0.82560170
  0.67850000   0.82560208
  0.67850000   0.82560246
  0.67850000   0.82560284
  0.67850000   0.82560322
  0.67850000   0.82560359
  0.67850000   0.82560397
  0.67900000   0.82559169
  0.67900000   0.82559209
  0.67900000   0.82559249
  0.67900000   0.82559289
  0.67900000   0.82559329
  0.67900000   0.82559369
  0.67900000   0.82559408
  0.67900000   0.82559448
  0.67900000   0.82559487
  0.67900000   0.82559527
  0.67900000   0.82559566
  0.67900000   0.82559605
  0.67900000   0.82559645
  0.67900000   0.82559684
  0.67900000   0.82559723
  0.67900000   0.82559762
  0.67900000   0.82559801
  0.67900000   0.82559840
  0.67900000   0.82559879
  0.67900000   0.82559917
  0.67900000   0.82559956
  0.67900000   0.82559995
  0.67900000   0.82560033
  0.67900000   0.82560072
  0.67900000   0.82560110
  0.67900000   0.82560149
  0.67900000   0.82560187
  0.67900000   0.82560225
  0.67900000   0.82560263
  0.67900000   0.82560301
  0.67900000   0.82560339
  0.67900000   0.82560377
  0.67900000   0.82560415
  0.67900000   0.82560453
  0.67900000   0.82560491
  0.67900000   0.82560529
  0.67900000   0.82560566
  0.67900000   0.82560604
  0.67900000   0.82560641
  0.67900000   0.82560679
  0.67950000   0.82559457
  0.67950000   0.82559496
  0.67950000   0.82559536
  0.67950000   0.82559576
  0.67950000   0.82559615
  0.67950000   0.82559655
  0.67950000   0.82559694
  0.67950000   0.82559734
  0.67950000   0.82559773
  0.67950000   0.82559812
  0.67950000   0.82559852
  0.67950000   0.82559891
  0.67950000   0.82559930
  0.67950000   0.82559969
  0.67950000   0.82560008
  0.67950000   0.82560047
  0.67950000   0.82560085
  0.67950000   0.82560124
  0.67950000   0.82560163
  0.67950000   0.82560201
  0.67950000   0.82560240
  0.67950000   0.82560278
  0.67950000   0.82560317
  0.67950000   0.82560355
  0.67950000   0.82560393
  0.67950000   0.82560431
  0.67950000   0.82560470
  0.67950000   0.82560508
  0.67950000   0.82560546
  0.67950000   0.82560584
  0.67950000   0.82560621
  0.67950000   0.82560659
  0.67950000   0.82560697
  0.67950000   0.82560735
  0.67950000   0.82560772
  0.67950000   0.82560810
  0.67950000   0.82560847
  0.67950000   0.82560885
  0.67950000   0.82560922
  0.67950000   0.82560959
  0.68000000   0.82559743
  0.68000000   0.82559782
  0.68000000   0.82559822
  0.68000000   0.82559861
  0.68000000   0.82559901
  0.68000000   0.82559940
  0.68000000   0.82559979
  0.68000000   0.82560019
  0.68000000   0.82560058
  0.68000000   0.82560097
  0.68000000   0.82560136
  0.68000000   0.82560175
  0.68000000   0.82560214
  0.68000000   0.82560252
  0.68000000   0.82560291
  0.68000000   0.82560330
  0.68000000   0.82560369
  0.68000000   0.82560407
  0.68000000   0.82560446
  0.68000000   0.82560484
  0.68000000   0.82560522
  0.68000000   0.82560561
  0.68000000   0.82560599
  0.68000000   0.82560637
  0.68000000   0.82560675
  0.68000000   0.82560713
  0.68000000   0.82560751
  0.68000000   0.82560789
  0.68000000   0.82560827
  0.68000000   0.82560865
  0.68000000   0.82560902
  0.68000000   0.82560940
  0.68000000   0.82560978
  0.68000000   0.82561015
  0.68000000   0.82561053
  0.68000000   0.82561090
  0.68000000   0.82561127
  0.68000000   0.82561165
  0.68000000   0.82561202
  0.68000000   0.82561239
  0.68050000   0.82560027
  0.68050000   0.82560067
  0.68050000   0.82560106
  0.68050000   0.82560145
  0.68050000   0.82560185
  0.68050000   0.82560224
  0.68050000   0.82560263
  0.68050000   0.82560302
  0.68050000   0.82560341
  0.68050000   0.82560380
  0.68050000   0.82560419
  0.68050000   0.82560457
  0.68050000   0.82560496
  0.68050000   0.82560535
  0.68050000   0.82560573
  0.68050000   0.82560612
  0.68050000   0.82560650
  0.68050000   0.82560689
  0.68050000   0.82560727
  0.68050000   0.82560765
  0.68050000   0.82560804
  0.68050000   0.82560842
  0.68050000   0.82560880
  0.68050000   0.82560918
  0.68050000   0.82560956
  0.68050000   0.82560993
  0.68050000   0.82561031
  0.68050000   0.82561069
  0.68050000   0.82561107
  0.68050000   0.82561144
  0.68050000   0.82561182
  0.68050000   0.82561219
  0.68050000   0.82561257
  0.68050000   0.82561294
  0.68050000   0.82561331
  0.68050000   0.82561369
  0.68050000   0.82561406
  0.68050000   0.82561443
  0.68050000   0.82561480
  0.68050000   0.82561517
  0.68100000   0.82560310
  0.68100000   0.82560350
  0.68100000   0.82560389
  0.68100000   0.82560428
  0.68100000   0.82560467
  0.68100000   0.82560506
  0.68100000   0.82560545
  0.68100000   0.82560584
  0.68100000   0.82560623
  0.68100000   0.82560662
  0.68100000   0.82560700
  0.68100000   0.82560739
  0.68100000   0.82560777
  0.68100000   0.82560816
  0.68100000   0.82560854
  0.68100000   0.82560893
  0.68100000   0.82560931
  0.68100000   0.82560969
  0.68100000   0.82561007
  0.68100000   0.82561045
  0.68100000   0.82561083
  0.68100000   0.82561121
  0.68100000   0.82561159
  0.68100000   0.82561197
  0.68100000   0.82561235
  0.68100000   0.82561273
  0.68100000   0.82561310
  0.68100000   0.82561348
  0.68100000   0.82561385
  0.68100000   0.82561423
  0.68100000   0.82561460
  0.68100000   0.82561497
  0.68100000   0.82561535
  0.68100000   0.82561572
  0.68100000   0.82561609
  0.68100000   0.82561646
  0.68100000   0.82561683
  0.68100000   0.82561720
  0.68100000   0.82561757
  0.68100000   0.82561794
  0.68150000   0.82560592
  0.68150000   0.82560632
  0.68150000   0.82560671
  0.68150000   0.82560710
  0.68150000   0.82560748
  0.68150000   0.82560787
  0.68150000   0.82560826
  0.68150000   0.82560865
  0.68150000   0.82560903
  0.68150000   0.82560942
  0.68150000   0.82560981
  0.68150000   0.82561019
  0.68150000   0.82561057
  0.68150000   0.82561096
  0.68150000   0.82561134
  0.68150000   0.82561172
  0.68150000   0.82561210
  0.68150000   0.82561248
  0.68150000   0.82561286
  0.68150000   0.82561324
  0.68150000   0.82561362
  0.68150000   0.82561400
  0.68150000   0.82561438
  0.68150000   0.82561475
  0.68150000   0.82561513
  0.68150000   0.82561550
  0.68150000   0.82561588
  0.68150000   0.82561625
  0.68150000   0.82561663
  0.68150000   0.82561700
  0.68150000   0.82561737
  0.68150000   0.82561774
  0.68150000   0.82561811
  0.68150000   0.82561848
  0.68150000   0.82561885
  0.68150000   0.82561922
  0.68150000   0.82561959
  0.68150000   0.82561996
  0.68150000   0.82562033
  0.68150000   0.82562069
  0.68200000   0.82560873
  0.68200000   0.82560912
  0.68200000   0.82560951
  0.68200000   0.82560990
  0.68200000   0.82561029
  0.68200000   0.82561067
  0.68200000   0.82561106
  0.68200000   0.82561144
  0.68200000   0.82561183
  0.68200000   0.82561221
  0.68200000   0.82561260
  0.68200000   0.82561298
  0.68200000   0.82561336
  0.68200000   0.82561374
  0.68200000   0.82561412
  0.68200000   0.82561450
  0.68200000   0.82561488
  0.68200000   0.82561526
  0.68200000   0.82561564
  0.68200000   0.82561602
  0.68200000   0.82561639
  0.68200000   0.82561677
  0.68200000   0.82561715
  0.68200000   0.82561752
  0.68200000   0.82561790
  0.68200000   0.82561827
  0.68200000   0.82561864
  0.68200000   0.82561902
  0.68200000   0.82561939
  0.68200000   0.82561976
  0.68200000   0.82562013
  0.68200000   0.82562050
  0.68200000   0.82562087
  0.68200000   0.82562124
  0.68200000   0.82562160
  0.68200000   0.82562197
  0.68200000   0.82562234
  0.68200000   0.82562271
  0.68200000   0.82562307
  0.68200000   0.82562344
  0.68250000   0.82561153
  0.68250000   0.82561191
  0.68250000   0.82561230
  0.68250000   0.82561269
  0.68250000   0.82561307
  0.68250000   0.82561346
  0.68250000   0.82561384
  0.68250000   0.82561423
  0.68250000   0.82561461
  0.68250000   0.82561499
  0.68250000   0.82561537
  0.68250000   0.82561575
  0.68250000   0.82561614
  0.68250000   0.82561652
  0.68250000   0.82561689
  0.68250000   0.82561727
  0.68250000   0.82561765
  0.68250000   0.82561803
  0.68250000   0.82561840
  0.68250000   0.82561878
  0.68250000   0.82561916
  0.68250000   0.82561953
  0.68250000   0.82561990
  0.68250000   0.82562028
  0.68250000   0.82562065
  0.68250000   0.82562102
  0.68250000   0.82562139
  0.68250000   0.82562176
  0.68250000   0.82562214
  0.68250000   0.82562250
  0.68250000   0.82562287
  0.68250000   0.82562324
  0.68250000   0.82562361
  0.68250000   0.82562398
  0.68250000   0.82562434
  0.68250000   0.82562471
  0.68250000   0.82562507
  0.68250000   0.82562544
  0.68250000   0.82562580
  0.68250000   0.82562617
  0.68300000   0.82561431
  0.68300000   0.82561469
  0.68300000   0.82561508
  0.68300000   0.82561546
  0.68300000   0.82561585
  0.68300000   0.82561623
  0.68300000   0.82561661
  0.68300000   0.82561700
  0.68300000   0.82561738
  0.68300000   0.82561776
  0.68300000   0.82561814
  0.68300000   0.82561852
  0.68300000   0.82561890
  0.68300000   0.82561928
  0.68300000   0.82561965
  0.68300000   0.82562003
  0.68300000   0.82562041
  0.68300000   0.82562078
  0.68300000   0.82562116
  0.68300000   0.82562153
  0.68300000   0.82562190
  0.68300000   0.82562228
  0.68300000   0.82562265
  0.68300000   0.82562302
  0.68300000   0.82562339
  0.68300000   0.82562376
  0.68300000   0.82562413
  0.68300000   0.82562450
  0.68300000   0.82562487
  0.68300000   0.82562524
  0.68300000   0.82562561
  0.68300000   0.82562597
  0.68300000   0.82562634
  0.68300000   0.82562670
  0.68300000   0.82562707
  0.68300000   0.82562743
  0.68300000   0.82562780
  0.68300000   0.82562816
  0.68300000   0.82562852
  0.68300000   0.82562888
  0.68350000   0.82561708
  0.68350000   0.82561746
  0.68350000   0.82561784
  0.68350000   0.82561823
  0.68350000   0.82561861
  0.68350000   0.82561899
  0.68350000   0.82561937
  0.68350000   0.82561975
  0.68350000   0.82562013
  0.68350000   0.82562051
  0.68350000   0.82562089
  0.68350000   0.82562127
  0.68350000   0.82562165
  0.68350000   0.82562202
  0.68350000   0.82562240
  0.68350000   0.82562277
  0.68350000   0.82562315
  0.68350000   0.82562352
  0.68350000   0.82562390
  0.68350000   0.82562427
  0.68350000   0.82562464
  0.68350000   0.82562501
  0.68350000   0.82562538
  0.68350000   0.82562575
  0.68350000   0.82562612
  0.68350000   0.82562649
  0.68350000   0.82562686
  0.68350000   0.82562723
  0.68350000   0.82562759
  0.68350000   0.82562796
  0.68350000   0.82562833
  0.68350000   0.82562869
  0.68350000   0.82562906
  0.68350000   0.82562942
  0.68350000   0.82562978
  0.68350000   0.82563014
  0.68350000   0.82563051
  0.68350000   0.82563087
  0.68350000   0.82563123
  0.68350000   0.82563159
  0.68400000   0.82561983
  0.68400000   0.82562022
  0.68400000   0.82562060
  0.68400000   0.82562098
  0.68400000   0.82562136
  0.68400000   0.82562174
  0.68400000   0.82562212
  0.68400000   0.82562250
  0.68400000   0.82562288
  0.68400000   0.82562325
  0.68400000   0.82562363
  0.68400000   0.82562401
  0.68400000   0.82562438
  0.68400000   0.82562476
  0.68400000   0.82562513
  0.68400000   0.82562551
  0.68400000   0.82562588
  0.68400000   0.82562625
  0.68400000   0.82562662
  0.68400000   0.82562699
  0.68400000   0.82562736
  0.68400000   0.82562773
  0.68400000   0.82562810
  0.68400000   0.82562847
  0.68400000   0.82562884
  0.68400000   0.82562921
  0.68400000   0.82562957
  0.68400000   0.82562994
  0.68400000   0.82563030
  0.68400000   0.82563067
  0.68400000   0.82563103
  0.68400000   0.82563140
  0.68400000   0.82563176
  0.68400000   0.82563212
  0.68400000   0.82563248
  0.68400000   0.82563284
  0.68400000   0.82563320
  0.68400000   0.82563356
  0.68400000   0.82563392
  0.68400000   0.82563428
  0.68450000   0.82562258
  0.68450000   0.82562296
  0.68450000   0.82562334
  0.68450000   0.82562372
  0.68450000   0.82562410
  0.68450000   0.82562448
  0.68450000   0.82562485
  0.68450000   0.82562523
  0.68450000   0.82562561
  0.68450000   0.82562598
  0.68450000   0.82562636
  0.68450000   0.82562673
  0.68450000   0.82562711
  0.68450000   0.82562748
  0.68450000   0.82562785
  0.68450000   0.82562822
  0.68450000   0.82562860
  0.68450000   0.82562897
  0.68450000   0.82562934
  0.68450000   0.82562971
  0.68450000   0.82563007
  0.68450000   0.82563044
  0.68450000   0.82563081
  0.68450000   0.82563118
  0.68450000   0.82563154
  0.68450000   0.82563191
  0.68450000   0.82563227
  0.68450000   0.82563264
  0.68450000   0.82563300
  0.68450000   0.82563337
  0.68450000   0.82563373
  0.68450000   0.82563409
  0.68450000   0.82563445
  0.68450000   0.82563481
  0.68450000   0.82563517
  0.68450000   0.82563553
  0.68450000   0.82563589
  0.68450000   0.82563625
  0.68450000   0.82563661
  0.68450000   0.82563696
  0.68500000   0.82562531
  0.68500000   0.82562569
  0.68500000   0.82562607
  0.68500000   0.82562644
  0.68500000   0.82562682
  0.68500000   0.82562720
  0.68500000   0.82562757
  0.68500000   0.82562795
  0.68500000   0.82562833
  0.68500000   0.82562870
  0.68500000   0.82562907
  0.68500000   0.82562945
  0.68500000   0.82562982
  0.68500000   0.82563019
  0.68500000   0.82563056
  0.68500000   0.82563093
  0.68500000   0.82563130
  0.68500000   0.82563167
  0.68500000   0.82563204
  0.68500000   0.82563241
  0.68500000   0.82563277
  0.68500000   0.82563314
  0.68500000   0.82563351
  0.68500000   0.82563387
  0.68500000   0.82563424
  0.68500000   0.82563460
  0.68500000   0.82563496
  0.68500000   0.82563533
  0.68500000   0.82563569
  0.68500000   0.82563605
  0.68500000   0.82563641
  0.68500000   0.82563677
  0.68500000   0.82563713
  0.68500000   0.82563749
  0.68500000   0.82563785
  0.68500000   0.82563821
  0.68500000   0.82563856
  0.68500000   0.82563892
  0.68500000   0.82563928
  0.68500000   0.82563963
  0.68550000   0.82562803
  0.68550000   0.82562840
  0.68550000   0.82562878
  0.68550000   0.82562916
  0.68550000   0.82562953
  0.68550000   0.82562991
  0.68550000   0.82563028
  0.68550000   0.82563066
  0.68550000   0.82563103
  0.68550000   0.82563140
  0.68550000   0.82563178
  0.68550000   0.82563215
  0.68550000   0.82563252
  0.68550000   0.82563289
  0.68550000   0.82563326
  0.68550000   0.82563363
  0.68550000   0.82563399
  0.68550000   0.82563436
  0.68550000   0.82563473
  0.68550000   0.82563509
  0.68550000   0.82563546
  0.68550000   0.82563582
  0.68550000   0.82563619
  0.68550000   0.82563655
  0.68550000   0.82563692
  0.68550000   0.82563728
  0.68550000   0.82563764
  0.68550000   0.82563800
  0.68550000   0.82563836
  0.68550000   0.82563872
  0.68550000   0.82563908
  0.68550000   0.82563944
  0.68550000   0.82563980
  0.68550000   0.82564016
  0.68550000   0.82564051
  0.68550000   0.82564087
  0.68550000   0.82564122
  0.68550000   0.82564158
  0.68550000   0.82564193
  0.68550000   0.82564229
  0.68600000   0.82563073
  0.68600000   0.82563111
  0.68600000   0.82563149
  0.68600000   0.82563186
  0.68600000   0.82563223
  0.68600000   0.82563261
  0.68600000   0.82563298
  0.68600000   0.82563335
  0.68600000   0.82563372
  0.68600000   0.82563410
  0.68600000   0.82563447
  0.68600000   0.82563484
  0.68600000   0.82563520
  0.68600000   0.82563557
  0.68600000   0.82563594
  0.68600000   0.82563631
  0.68600000   0.82563667
  0.68600000   0.82563704
  0.68600000   0.82563740
  0.68600000   0.82563777
  0.68600000   0.82563813
  0.68600000   0.82563850
  0.68600000   0.82563886
  0.68600000   0.82563922
  0.68600000   0.82563958
  0.68600000   0.82563994
  0.68600000   0.82564030
  0.68600000   0.82564066
  0.68600000   0.82564102
  0.68600000   0.82564138
  0.68600000   0.82564174
  0.68600000   0.82564210
  0.68600000   0.82564245
  0.68600000   0.82564281
  0.68600000   0.82564316
  0.68600000   0.82564352
  0.68600000   0.82564387
  0.68600000   0.82564423
  0.68600000   0.82564458
  0.68600000   0.82564493
  0.68650000   0.82563343
  0.68650000   0.82563380
  0.68650000   0.82563418
  0.68650000   0.82563455
  0.68650000   0.82563492
  0.68650000   0.82563529
  0.68650000   0.82563566
  0.68650000   0.82563604
  0.68650000   0.82563641
  0.68650000   0.82563677
  0.68650000   0.82563714
  0.68650000   0.82563751
  0.68650000   0.82563788
  0.68650000   0.82563825
  0.68650000   0.82563861
  0.68650000   0.82563898
  0.68650000   0.82563934
  0.68650000   0.82563971
  0.68650000   0.82564007
  0.68650000   0.82564043
  0.68650000   0.82564080
  0.68650000   0.82564116
  0.68650000   0.82564152
  0.68650000   0.82564188
  0.68650000   0.82564224
  0.68650000   0.82564260
  0.68650000   0.82564296
  0.68650000   0.82564331
  0.68650000   0.82564367
  0.68650000   0.82564403
  0.68650000   0.82564439
  0.68650000   0.82564474
  0.68650000   0.82564510
  0.68650000   0.82564545
  0.68650000   0.82564580
  0.68650000   0.82564616
  0.68650000   0.82564651
  0.68650000   0.82564686
  0.68650000   0.82564721
  0.68650000   0.82564756
  0.68700000   0.82563611
  0.68700000   0.82563648
  0.68700000   0.82563685
  0.68700000   0.82563723
  0.68700000   0.82563760
  0.68700000   0.82563797
  0.68700000   0.82563834
  0.68700000   0.82563871
  0.68700000   0.82563907
  0.68700000   0.82563944
  0.68700000   0.82563981
  0.68700000   0.82564018
  0.68700000   0.82564054
  0.68700000   0.82564091
  0.68700000   0.82564127
  0.68700000   0.82564163
  0.68700000   0.82564200
  0.68700000   0.82564236
  0.68700000   0.82564272
  0.68700000   0.82564308
  0.68700000   0.82564344
  0.68700000   0.82564381
  0.68700000   0.82564416
  0.68700000   0.82564452
  0.68700000   0.82564488
  0.68700000   0.82564524
  0.68700000   0.82564560
  0.68700000   0.82564595
  0.68700000   0.82564631
  0.68700000   0.82564666
  0.68700000   0.82564702
  0.68700000   0.82564737
  0.68700000   0.82564773
  0.68700000   0.82564808
  0.68700000   0.82564843
  0.68700000   0.82564878
  0.68700000   0.82564913
  0.68700000   0.82564948
  0.68700000   0.82564983
  0.68700000   0.82565018
  0.68750000   0.82563878
  0.68750000   0.82563915
  0.68750000   0.82563952
  0.68750000   0.82563989
  0.68750000   0.82564026
  0.68750000   0.82564063
  0.68750000   0.82564100
  0.68750000   0.82564136
  0.68750000   0.82564173
  0.68750000   0.82564210
  0.68750000   0.82564246
  0.68750000   0.82564283
  0.68750000   0.82564319
  0.68750000   0.82564356
  0.68750000   0.82564392
  0.68750000   0.82564428
  0.68750000   0.82564464
  0.68750000   0.82564500
  0.68750000   0.82564536
  0.68750000   0.82564572
  0.68750000   0.82564608
  0.68750000   0.82564644
  0.68750000   0.82564680
  0.68750000   0.82564716
  0.68750000   0.82564751
  0.68750000   0.82564787
  0.68750000   0.82564822
  0.68750000   0.82564858
  0.68750000   0.82564893
  0.68750000   0.82564929
  0.68750000   0.82564964
  0.68750000   0.82564999
  0.68750000   0.82565035
  0.68750000   0.82565070
  0.68750000   0.82565105
  0.68750000   0.82565140
  0.68750000   0.82565175
  0.68750000   0.82565210
  0.68750000   0.82565244
  0.68750000   0.82565279
  0.68800000   0.82564144
  0.68800000   0.82564181
  0.68800000   0.82564218
  0.68800000   0.82564254
  0.68800000   0.82564291
  0.68800000   0.82564328
  0.68800000   0.82564364
  0.68800000   0.82564401
  0.68800000   0.82564438
  0.68800000   0.82564474
  0.68800000   0.82564510
  0.68800000   0.82564547
  0.68800000   0.82564583
  0.68800000   0.82564619
  0.68800000   0.82564655
  0.68800000   0.82564691
  0.68800000   0.82564727
  0.68800000   0.82564763
  0.68800000   0.82564799
  0.68800000   0.82564835
  0.68800000   0.82564871
  0.68800000   0.82564906
  0.68800000   0.82564942
  0.68800000   0.82564978
  0.68800000   0.82565013
  0.68800000   0.82565049
  0.68800000   0.82565084
  0.68800000   0.82565119
  0.68800000   0.82565155
  0.68800000   0.82565190
  0.68800000   0.82565225
  0.68800000   0.82565260
  0.68800000   0.82565295
  0.68800000   0.82565330
  0.68800000   0.82565365
  0.68800000   0.82565400
  0.68800000   0.82565435
  0.68800000   0.82565469
  0.68800000   0.82565504
  0.68800000   0.82565539
  0.68850000   0.82564408
  0.68850000   0.82564445
  0.68850000   0.82564482
  0.68850000   0.82564518
  0.68850000   0.82564555
  0.68850000   0.82564592
  0.68850000   0.82564628
  0.68850000   0.82564664
  0.68850000   0.82564701
  0.68850000   0.82564737
  0.68850000   0.82564773
  0.68850000   0.82564809
  0.68850000   0.82564846
  0.68850000   0.82564882
  0.68850000   0.82564918
  0.68850000   0.82564954
  0.68850000   0.82564989
  0.68850000   0.82565025
  0.68850000   0.82565061
  0.68850000   0.82565097
  0.68850000   0.82565132
  0.68850000   0.82565168
  0.68850000   0.82565203
  0.68850000   0.82565239
  0.68850000   0.82565274
  0.68850000   0.82565309
  0.68850000   0.82565344
  0.68850000   0.82565380
  0.68850000   0.82565415
  0.68850000   0.82565450
  0.68850000   0.82565485
  0.68850000   0.82565520
  0.68850000   0.82565555
  0.68850000   0.82565589
  0.68850000   0.82565624
  0.68850000   0.82565659
  0.68850000   0.82565694
  0.68850000   0.82565728
  0.68850000   0.82565763
  0.68850000   0.82565797
  0.68900000   0.82564672
  0.68900000   0.82564708
  0.68900000   0.82564745
  0.68900000   0.82564781
  0.68900000   0.82564818
  0.68900000   0.82564854
  0.68900000   0.82564890
  0.68900000   0.82564927
  0.68900000   0.82564963
  0.68900000   0.82564999
  0.68900000   0.82565035
  0.68900000   0.82565071
  0.68900000   0.82565107
  0.68900000   0.82565143
  0.68900000   0.82565179
  0.68900000   0.82565214
  0.68900000   0.82565250
  0.68900000   0.82565286
  0.68900000   0.82565321
  0.68900000   0.82565357
  0.68900000   0.82565392
  0.68900000   0.82565428
  0.68900000   0.82565463
  0.68900000   0.82565498
  0.68900000   0.82565533
  0.68900000   0.82565569
  0.68900000   0.82565604
  0.68900000   0.82565639
  0.68900000   0.82565674
  0.68900000   0.82565709
  0.68900000   0.82565743
  0.68900000   0.82565778
  0.68900000   0.82565813
  0.68900000   0.82565848
  0.68900000   0.82565882
  0.68900000   0.82565917
  0.68900000   0.82565951
  0.68900000   0.82565986
  0.68900000   0.82566020
  0.68900000   0.82566054
  0.68950000   0.82564934
  0.68950000   0.82564970
  0.68950000   0.82565007
  0.68950000   0.82565043
  0.68950000   0.82565079
  0.68950000   0.82565115
  0.68950000   0.82565152
  0.68950000   0.82565188
  0.68950000   0.82565224
  0.68950000   0.82565260
  0.68950000   0.82565296
  0.68950000   0.82565331
  0.68950000   0.82565367
  0.68950000   0.82565403
  0.68950000   0.82565439
  0.68950000   0.82565474
  0.68950000   0.82565510
  0.68950000   0.82565545
  0.68950000   0.82565581
  0.68950000   0.82565616
  0.68950000   0.82565651
  0.68950000   0.82565686
  0.68950000   0.82565722
  0.68950000   0.82565757
  0.68950000   0.82565792
  0.68950000   0.82565827
  0.68950000   0.82565862
  0.68950000   0.82565897
  0.68950000   0.82565931
  0.68950000   0.82565966
  0.68950000   0.82566001
  0.68950000   0.82566035
  0.68950000   0.82566070
  0.68950000   0.82566105
  0.68950000   0.82566139
  0.68950000   0.82566173
  0.68950000   0.82566208
  0.68950000   0.82566242
  0.68950000   0.82566276
  0.68950000   0.82566310
  0.69000000   0.82565195
  0.69000000   0.82565231
  0.69000000   0.82565267
  0.69000000   0.82565303
  0.69000000   0.82565339
  0.69000000   0.82565376
  0.69000000   0.82565412
  0.69000000   0.82565447
  0.69000000   0.82565483
  0.69000000   0.82565519
  0.69000000   0.82565555
  0.69000000   0.82565591
  0.69000000   0.82565626
  0.69000000   0.82565662
  0.69000000   0.82565697
  0.69000000   0.82565733
  0.69000000   0.82565768
  0.69000000   0.82565803
  0.69000000   0.82565839
  0.69000000   0.82565874
  0.69000000   0.82565909
  0.69000000   0.82565944
  0.69000000   0.82565979
  0.69000000   0.82566014
  0.69000000   0.82566049
  0.69000000   0.82566084
  0.69000000   0.82566119
  0.69000000   0.82566153
  0.69000000   0.82566188
  0.69000000   0.82566223
  0.69000000   0.82566257
  0.69000000   0.82566292
  0.69000000   0.82566326
  0.69000000   0.82566360
  0.69000000   0.82566395
  0.69000000   0.82566429
  0.69000000   0.82566463
  0.69000000   0.82566497
  0.69000000   0.82566531
  0.69000000   0.82566565
  0.69050000   0.82565454
  0.69050000   0.82565490
  0.69050000   0.82565527
  0.69050000   0.82565563
  0.69050000   0.82565599
  0.69050000   0.82565634
  0.69050000   0.82565670
  0.69050000   0.82565706
  0.69050000   0.82565742
  0.69050000   0.82565777
  0.69050000   0.82565813
  0.69050000   0.82565849
  0.69050000   0.82565884
  0.69050000   0.82565919
  0.69050000   0.82565955
  0.69050000   0.82565990
  0.69050000   0.82566025
  0.69050000   0.82566060
  0.69050000   0.82566096
  0.69050000   0.82566131
  0.69050000   0.82566166
  0.69050000   0.82566201
  0.69050000   0.82566235
  0.69050000   0.82566270
  0.69050000   0.82566305
  0.69050000   0.82566340
  0.69050000   0.82566374
  0.69050000   0.82566409
  0.69050000   0.82566443
  0.69050000   0.82566478
  0.69050000   0.82566512
  0.69050000   0.82566546
  0.69050000   0.82566581
  0.69050000   0.82566615
  0.69050000   0.82566649
  0.69050000   0.82566683
  0.69050000   0.82566717
  0.69050000   0.82566751
  0.69050000   0.82566785
  0.69050000   0.82566819
  0.69100000   0.82565713
  0.69100000   0.82565749
  0.69100000   0.82565785
  0.69100000   0.82565821
  0.69100000   0.82565856
  0.69100000   0.82565892
  0.69100000   0.82565928
  0.69100000   0.82565964
  0.69100000   0.82565999
  0.69100000   0.82566035
  0.69100000   0.82566070
  0.69100000   0.82566105
  0.69100000   0.82566141
  0.69100000   0.82566176
  0.69100000   0.82566211
  0.69100000   0.82566246
  0.69100000   0.82566281
  0.69100000   0.82566316
  0.69100000   0.82566351
  0.69100000   0.82566386
  0.69100000   0.82566421
  0.69100000   0.82566456
  0.69100000   0.82566490
  0.69100000   0.82566525
  0.69100000   0.82566560
  0.69100000   0.82566594
  0.69100000   0.82566629
  0.69100000   0.82566663
  0.69100000   0.82566697
  0.69100000   0.82566732
  0.69100000   0.82566766
  0.69100000   0.82566800
  0.69100000   0.82566834
  0.69100000   0.82566868
  0.69100000   0.82566902
  0.69100000   0.82566936
  0.69100000   0.82566970
  0.69100000   0.82567004
  0.69100000   0.82567038
  0.69100000   0.82567072
  0.69150000   0.82565970
  0.69150000   0.82566006
  0.69150000   0.82566042
  0.69150000   0.82566078
  0.69150000   0.82566113
  0.69150000   0.82566149
  0.69150000   0.82566184
  0.69150000   0.82566220
  0.69150000   0.82566255
  0.69150000   0.82566291
  0.69150000   0.82566326
  0.69150000   0.82566361
  0.69150000   0.82566396
  0.69150000   0.82566431
  0.69150000   0.82566466
  0.69150000   0.82566501
  0.69150000   0.82566536
  0.69150000   0.82566571
  0.69150000   0.82566606
  0.69150000   0.82566641
  0.69150000   0.82566675
  0.69150000   0.82566710
  0.69150000   0.82566744
  0.69150000   0.82566779
  0.69150000   0.82566813
  0.69150000   0.82566848
  0.69150000   0.82566882
  0.69150000   0.82566916
  0.69150000   0.82566950
  0.69150000   0.82566985
  0.69150000   0.82567019
  0.69150000   0.82567053
  0.69150000   0.82567087
  0.69150000   0.82567121
  0.69150000   0.82567154
  0.69150000   0.82567188
  0.69150000   0.82567222
  0.69150000   0.82567256
  0.69150000   0.82567289
  0.69150000   0.82567323
  0.69200000   0.82566226
  0.69200000   0.82566262
  0.69200000   0.82566298
  0.69200000   0.82566333
  0.69200000   0.82566369
  0.69200000   0.82566404
  0.69200000   0.82566440
  0.69200000   0.82566475
  0.69200000   0.82566510
  0.69200000   0.82566545
  0.69200000   0.82566580
  0.69200000   0.82566615
  0.69200000   0.82566651
  0.69200000   0.82566685
  0.69200000   0.82566720
  0.69200000   0.82566755
  0.69200000   0.82566790
  0.69200000   0.82566825
  0.69200000   0.82566859
  0.69200000   0.82566894
  0.69200000   0.82566928
  0.69200000   0.82566963
  0.69200000   0.82566997
  0.69200000   0.82567032
[truncated: 641,057 more chars]
